# Supplementary material for: Increased calcium channel in the lamina propria of aging rat
Source: Aging (Albany NY). 2019 Oct 31;11(20):8810–24. doi: 10.18632/aging.102284 (PMC6834399; doi:10.18632/aging.102284)
Supplement: Supplementary data for Table 1 [file aging-11-102284-s002.xlsx]

## Sheet: DEG1 Y1-4 vs O1-4
GeneId	GeneAcc	GeneName	Desc	Value_1	Value_2	log2fc	p-value	q-value	DEG:PV=0.05:SELECT	DEG:UP_DOWN	DEG:QV<=0.05	DEG:QV<=0.10	DEG:PV<=0.01	DEG:PV<=0.05	DEG:FC2>=0	EXP:Y1-4:FPKM	EXP:O1-4:FPKM
TBIG000470	ENSRNOG00000020380.L01	Lgals7	lectin, galactoside-binding, soluble, 7 [Source:RGD Symbol;Acc:61951]	588	66.7	-3.14	5e-05	0.0726033	yes	DOWN	N	Y	Y	Y	Y	635.49	62.06
TBIG004075	XLOC_004075	env	Envelope glycoprotein [Source:SWISS;Acc:P31789]	2.61	0	#NAME?	5e-05	0.0726033	yes	DOWN	N	Y	Y	Y	Y	2.82	0
TBIG004085	XLOC_004085	-	-	0.865	0	#NAME?	5e-05	0.0726033	yes	DOWN	N	Y	Y	Y	Y	0.94	0
TBIG004582	ENSRNOG00000022964	Rnf222	ring finger protein 222 [Source:RGD Symbol;Acc:1310573]	1.45	0	#NAME?	5e-05	0.0726033	yes	DOWN	N	Y	Y	Y	Y	1.57	0
TBIG006667	ENSRNOG00000039668.L01	Col8a1	collagen, type VIII, alpha 1 [Source:RGD Symbol;Acc:1309361]	33.3	2.5	-3.74	5e-05	0.0726033	yes	DOWN	N	Y	Y	Y	Y	36.02	2.33
TBIG013600	ENSRNOG00000017159.L01	Dsc3	desmocollin 3 [Source:RGD Symbol;Acc:1311782]	26.1	3	-3.12	5e-05	0.0726033	yes	DOWN	N	Y	Y	Y	Y	28.21	2.79
TBIG013287	ENSRNOG00000016853.L01	Dsg1	desmoglein 1 [Source:RGD Symbol;Acc:1309925]	25.1	0.978	-4.68	5e-05	0.0726033	yes	DOWN	N	Y	Y	Y	Y	27.08	0.91
TBIG016193	ENSRNOG00000018679.L01	Rptn	repetin [Source:RGD Symbol;Acc:1311687]	1.13	0	#NAME?	5e-05	0.0726033	yes	DOWN	N	Y	Y	Y	Y	1.22	0
TBIG029390	ENSRNOG00000011823	Tfap2b	transcription factor AP-2 beta [Source:RGD Symbol;Acc:1306321]	0.602	0	#NAME?	5e-05	0.0726033	yes	DOWN	N	Y	Y	Y	Y	0.65	0
TBIG025485	XLOC_025485	-	-	1.33	0	#NAME?	0.0001	0.121006	yes	DOWN	N	N	Y	Y	Y	1.43	0
TBIG025936	ENSRNOG00000004476.L01	Wif1	Wnt inhibitory factor 1 [Source:RGD Symbol;Acc:619774]	120	4.24	-4.82	0.0001	0.121006	yes	DOWN	N	N	Y	Y	Y	129.81	3.95
TBIG007820	XLOC_007820	Cyp3a9	Cytochrome P450 3A9 [Source:SWISS;Acc:P51538]	61.1	7.56	-3.01	0.00015	0.136131	yes	DOWN	N	N	Y	Y	Y	65.92	7.04
TBIG009439	ENSRNOG00000029964.L01	Tmprss11g	transmembrane protease, serine 11G [Source:RGD Symbol;Acc:1306446]	63.2	8.9	-2.83	0.00015	0.136131	yes	DOWN	N	N	Y	Y	Y	68.17	8.29
TBIG011778	ENSRNOG00000043342	LOC290595	hypothetical gene supported by AF152002 [Source:RGD Symbol;Acc:1566160]	169	17.7	-3.26	0.00015	0.136131	yes	DOWN	N	N	Y	Y	Y	182.1	16.42
TBIG014258	ENSRNOG00000012238.L01	Clec3a	C-type lectin domain family 3, member A [Source:RGD Symbol;Acc:1306295]	33.7	3.59	-3.23	0.00015	0.136131	yes	DOWN	N	N	Y	Y	Y	36.39	3.34
TBIG024098	XLOC_024098	-	-	1.45	0	#NAME?	0.00015	0.136131	yes	DOWN	N	N	Y	Y	Y	1.57	0
TBIG029136	XLOC_029136	-	-	1.21	0	#NAME?	0.00015	0.136131	yes	DOWN	N	N	Y	Y	Y	1.31	0
TBIG011678	ENSRNOG00000028636.L01	Xkr5	XK, Kell blood group complex subunit-related family, member 5 [Source:RGD Symbol;Acc:1359335]	2.75	0	#NAME?	0.0002	0.155579	yes	DOWN	N	N	Y	Y	Y	2.98	0
TBIG013613	ENSRNOG00000016632.L01	Dsg3	desmoglein 3 [Source:RGD Symbol;Acc:1592103]	62.7	7.59	-3.05	0.00035	0.245915	yes	DOWN	N	N	Y	Y	Y	67.7	7.07
TBIG026986	ENSRNOG00000025994.L01	Krt80	keratin 80 [Source:RGD Symbol;Acc:1359177]	105	14	-2.91	0.0004	0.258627	yes	DOWN	N	N	Y	Y	Y	113.47	13.02
TBIG015429	XLOC_015429	Sprr1a	Cornifin-A [Source:SWISS;Acc:Q63532]	189	15.7	-3.6	0.0005	0.258627	yes	DOWN	N	N	Y	Y	Y	204.41	14.56
TBIG027007	ENSRNOG00000024909	Krt78	keratin 78 [Source:RGD Symbol;Acc:1591341]	22.5	1.19	-4.24	0.0005	0.258627	yes	DOWN	N	N	Y	Y	Y	24.33	1.11
TBIG015752	ENSRNOG00000012471	Thbs4	thrombospondin 4 [Source:RGD Symbol;Acc:62046]	36.6	5.51	-2.73	0.00055	0.258627	yes	DOWN	N	N	Y	Y	Y	39.57	5.13
TBIG023580	ENSRNOG00000029427.L01	Grhl3	grainyhead-like 3 (Drosophila) [Source:RGD Symbol;Acc:1308320]	25.4	3.74	-2.76	0.00055	0.258627	yes	DOWN	N	N	Y	Y	Y	27.42	3.48
TBIG008326	ENSRNOG00000002460.L01	Serpinb2	serpin peptidase inhibitor, clade B (ovalbumin), member 2 [Source:RGD Symbol;Acc:621823]	68.7	11.1	-2.63	0.0006	0.258627	yes	DOWN	N	N	Y	Y	Y	74.13	10.35
TBIG026996	ENSRNOG00000009160	LOC683295	similar to keratin complex 2, basic, gene 6a [Source:RGD Symbol;Acc:1589189]	45.6	2.21	-4.37	0.0006	0.258627	yes	DOWN	N	N	Y	Y	Y	49.32	2.06
TBIG002838	ENSRNOG00000028137.L01	Mki67	marker of proliferation Ki-67 [Source:RGD Symbol;Acc:1305476]	6.41	0.76	-3.08	0.0007	0.258627	yes	DOWN	N	N	Y	Y	Y	6.92	0.71
TBIG000447	ENSRNOG00000026244.L01	Nccrp1	non-specific cytotoxic cell receptor protein 1 homolog (zebrafish) [Source:RGD Symbol;Acc:1305932]	60.5	1.83	-5.05	0.00075	0.258627	yes	DOWN	N	N	Y	Y	Y	65.43	1.7
TBIG008321	ENSRNOG00000002640.L01	Serpinb5	serpin peptidase inhibitor, clade B (ovalbumin), member 5 [Source:RGD Symbol;Acc:69342]	67.5	10.8	-2.64	0.00075	0.258627	yes	DOWN	N	N	Y	Y	Y	72.83	10.11
TBIG009434	ENSRNOG00000007183	LOC100360977	TRIMCyp-like [Source:RGD Symbol;Acc:2321083]	147	26.2	-2.49	0.00085	0.258627	yes	DOWN	N	N	Y	Y	Y	159.13	24.38
TBIG005793	ENSRNOG00000032404.L01	Top2a	topoisomerase (DNA) II alpha [Source:RGD Symbol;Acc:62048]	12.7	1.29	-3.29	0.0009	0.258627	yes	DOWN	N	N	Y	Y	Y	13.69	1.2
TBIG022741	ENSRNOG00000010841.L01	Col8a2	collagen, type VIII, alpha 2 [Source:RGD Symbol;Acc:1305182]	8.46	0.975	-3.12	0.0009	0.258627	yes	DOWN	N	N	Y	Y	Y	9.15	0.91
TBIG028117	ENSRNOG00000026951.L01	Susd5	sushi domain containing 5 [Source:RGD Symbol;Acc:1561132]	10.2	1.34	-2.92	0.00095	0.258627	yes	DOWN	N	N	Y	Y	Y	11	1.25
TBIG031263	ENSRNOG00000004795.L01	Pof1b	premature ovarian failure 1B [Source:RGD Symbol;Acc:1560798]	48.1	7.82	-2.62	0.00095	0.258627	yes	DOWN	N	N	Y	Y	Y	51.94	7.29
TBIG015663	ENSRNOG00000032959	Adh7	alcohol dehydrogenase 7 (class IV), mu or sigma polypeptide [Source:RGD Symbol;Acc:621638]	184	31.1	-2.57	0.0011	0.258627	yes	DOWN	N	N	Y	Y	Y	198.77	28.95
TBIG014187	ENSRNOG00000013808.L01	Ces2g	carboxylesterase 2G [Source:RGD Symbol;Acc:1308358]	32	5.51	-2.54	0.00115	0.258627	yes	DOWN	N	N	Y	Y	Y	34.59	5.13
TBIG013779	ENSRNOG00000012176.L01	Rab27b	RAB27B, member RAS oncogene family [Source:RGD Symbol;Acc:620114]	18.1	3.33	-2.44	0.0014	0.258627	yes	DOWN	N	N	Y	Y	Y	19.5	3.1
TBIG015411	ENSRNOG00000021798.L01	LOC100910179	peptidoglycan recognition protein 4-like [Source:RGD Symbol;Acc:6499827]	1	0	#NAME?	0.0015	0.258627	yes	DOWN	N	N	Y	Y	Y	1.08	0
TBIG000741	ENSRNOG00000017140.L01	Zfp185	zinc finger protein 185 [Source:RGD Symbol;Acc:1586351]	26.5	5.75	-2.21	0.0016	0.258627	yes	DOWN	N	N	Y	Y	Y	28.66	5.36
TBIG017420	ENSRNOG00000030676.L01	RGD1562885	similar to RIKEN cDNA 2300002M23 [Source:RGD Symbol;Acc:1562885]	53.5	9.42	-2.5	0.0016	0.258627	yes	DOWN	N	N	Y	Y	Y	57.81	8.77
TBIG012929	ENSRNOG00000017933.L02	Ccdc3	coiled-coil domain containing 3 [Source:RGD Symbol;Acc:1559473]	25.3	2.98	-3.08	0.0018	0.258627	yes	DOWN	N	N	Y	Y	Y	27.3	2.78
TBIG013601	ENSRNOG00000039969.L01	Dsc2	desmocollin 2 [Source:RGD Symbol;Acc:1309426]	81.5	14.4	-2.5	0.0018	0.258627	yes	DOWN	N	N	Y	Y	Y	88.04	13.42
TBIG006938	ENSRNOG00000021569.L01	Tiam1	T-cell lymphoma invasion and metastasis 1 [Source:RGD Symbol;Acc:1307455]	18.7	3.72	-2.33	0.0019	0.258627	yes	DOWN	N	N	Y	Y	Y	20.22	3.46
TBIG008333	ENSRNOG00000002414.L01	Tfcp2l1	transcription factor CP2-like 1 [Source:RGD Symbol;Acc:1305456]	10.5	2.2	-2.26	0.0019	0.258627	yes	DOWN	N	N	Y	Y	Y	11.36	2.04
TBIG016424	ENSRNOG00000036877.L01	Clca4l	chloride channel calcium activated 4-like [Source:RGD Symbol;Acc:1591945]	28.7	0.677	-5.4	0.0021	0.258627	yes	DOWN	N	N	Y	Y	Y	30.98	0.63
TBIG014939	ENSRNOG00000032002.L01	Hapln1	hyaluronan and proteoglycan link protein 1 [Source:RGD Symbol;Acc:2412]	8.73	0.987	-3.14	0.0022	0.258627	yes	DOWN	N	N	Y	Y	Y	9.42	0.92
TBIG015080	ENSRNOG00000019184.L01	Npr3	natriuretic peptide receptor 3 [Source:RGD Symbol;Acc:3196]	12.8	2.36	-2.44	0.0022	0.258627	yes	DOWN	N	N	Y	Y	Y	13.81	2.2
TBIG020676	ENSRNOG00000008816.L01	Gpnmb	glycoprotein (transmembrane) nmb [Source:RGD Symbol;Acc:71008]	47.9	10.5	-2.19	0.0022	0.258627	yes	DOWN	N	N	Y	Y	Y	51.79	9.74
TBIG024381	ENSRNOG00000023316.L01	Grhl1	grainyhead-like 1 (Drosophila) [Source:RGD Symbol;Acc:1305735]	34.9	6.88	-2.34	0.00225	0.258627	yes	DOWN	N	N	Y	Y	Y	37.75	6.4
TBIG017692	ENSRNOG00000000323.L01	Prdm1	PR domain containing 1, with ZNF domain [Source:RGD Symbol;Acc:1311765]	5.56	0.658	-3.08	0.00235	0.258627	yes	DOWN	N	N	Y	Y	Y	6.01	0.61
TBIG028291	ENSRNOG00000014343.L01	Anln	anillin, actin binding protein [Source:RGD Symbol;Acc:1561367]	11.2	1.41	-2.98	0.00235	0.258627	yes	DOWN	N	N	Y	Y	Y	12.07	1.32
TBIG028602	ENSRNOG00000011925.L01	Fam83b	family with sequence similarity 83, member B [Source:RGD Symbol;Acc:1311988]	8.72	1.77	-2.3	0.0024	0.258627	yes	DOWN	N	N	Y	Y	Y	9.42	1.65
TBIG016198	ENSRNOG00000029760.L01	AABR06019060.1	Uncharacterized protein [Source:UniProtKB/TrEMBL;Acc:D3ZS07]	2.67	0	#NAME?	0.0026	0.258627	yes	DOWN	N	N	Y	Y	Y	2.89	0
TBIG009454	ENSRNOG00000024689.L01	Hopx	HOP homeobox [Source:RGD Symbol;Acc:621841]	368	75.5	-2.29	0.00265	0.258627	yes	DOWN	N	N	Y	Y	Y	397.75	70.28
TBIG027942	ENSRNOG00000025332.L01	Cd109	CD109 molecule [Source:RGD Symbol;Acc:1311287]	11.7	1.54	-2.93	0.0027	0.258627	yes	DOWN	N	N	Y	Y	Y	12.62	1.43
TBIG012179	XLOC_012179	-	-	0.898	0	#NAME?	0.00285	0.258627	yes	DOWN	N	N	Y	Y	Y	0.97	0
TBIG022250	XLOC_022250	-	-	1.14	0	#NAME?	0.00285	0.258627	yes	DOWN	N	N	Y	Y	Y	1.24	0
TBIG012912	ENSRNOG00000028576.L01	Calml5	calmodulin-like 5 [Source:RGD Symbol;Acc:1310047]	291	34	-3.1	0.0029	0.258627	yes	DOWN	N	N	Y	Y	Y	314.38	31.61
TBIG016224	ENSRNOG00000021134.L01	Anxa9	annexin A9 [Source:RGD Symbol;Acc:1587550]	25.1	2.69	-3.22	0.00315	0.258627	yes	DOWN	N	N	Y	Y	Y	27.14	2.51
TBIG013000	XLOC_013000	Pol	Retrovirus-related Pol polyprotein LINE-1 [Source:SWISS;Acc:P11369]	1.34	0	#NAME?	0.0032	0.258627	yes	DOWN	N	N	Y	Y	Y	1.45	0
TBIG016922	XLOC_016922	-	-	0.823	0	#NAME?	0.0032	0.258627	yes	DOWN	N	N	Y	Y	Y	0.89	0
TBIG026788	ENSRNOG00000023828.L01	LOC680875	similar to dystonin isoform 1 [Source:RGD Symbol;Acc:1587008]	52.2	7	-2.9	0.0032	0.258627	yes	DOWN	N	N	Y	Y	Y	56.45	6.51
TBIG004296	ENSRNOG00000005336	Prss27	protease, serine 27 [Source:RGD Symbol;Acc:1303256]	33	3.94	-3.07	0.00325	0.258627	yes	DOWN	N	N	Y	Y	Y	35.62	3.66
TBIG022247	XLOC_022247	-	-	1.23	0	#NAME?	0.0033	0.258627	yes	DOWN	N	N	Y	Y	Y	1.33	0
TBIG000385	ENSRNOG00000019999.L01	Lypd3	Ly6/Plaur domain containing 3 [Source:RGD Symbol;Acc:69053]	139	31.1	-2.16	0.00335	0.258627	yes	DOWN	N	N	Y	Y	Y	150.38	28.93
TBIG010546	ENSRNOG00000020382.L01	Ltb4r2	leukotriene B4 receptor 2 [Source:RGD Symbol;Acc:621029]	7.56	0.692	-3.45	0.00335	0.258627	yes	DOWN	N	N	Y	Y	Y	8.19	0.64
TBIG019233	ENSRNOG00000009399.L01	RGD1311224	similar to fatty acid desaturase 2; linoleoyl-CoA desaturase (delta-6-desaturase)-like 2; delta-6 fatty acid desaturase [Source:RGD Symbol;Acc:1311224]	33.7	5.59	-2.59	0.00345	0.258627	yes	DOWN	N	N	Y	Y	Y	36.4	5.2
TBIG022055	XLOC_022055	-	-	0.887	0	#NAME?	0.00345	0.258627	yes	DOWN	N	N	Y	Y	Y	0.96	0
TBIG022233	XLOC_022233	-	-	1.9	0	#NAME?	0.00345	0.258627	yes	DOWN	N	N	Y	Y	Y	2.05	0
TBIG018514	ENSRNOG00000050251	MGC105649	hypothetical LOC302884 [Source:RGD Symbol;Acc:1359583]	70.6	15.5	-2.19	0.0035	0.258627	yes	DOWN	N	N	Y	Y	Y	76.25	14.45
TBIG029378	ENSRNOG00000025603.L01	Gpr111	G protein-coupled receptor 111 [Source:RGD Symbol;Acc:1306718]	5.31	0.463	-3.52	0.0035	0.258627	yes	DOWN	N	N	Y	Y	Y	5.74	0.43
TBIG005116	ENSRNOG00000021902.L01	Rmi2	RecQ mediated genome instability 2 [Source:RGD Symbol;Acc:1563163]	0.877	0	#NAME?	0.00355	0.258627	yes	DOWN	N	N	Y	Y	Y	0.95	0
TBIG027248	XLOC_027248	-	-	1.32	0	#NAME?	0.0037	0.258627	yes	DOWN	N	N	Y	Y	Y	1.42	0
TBIG003494	XLOC_003494	Krt6a	Keratin, type II cytoskeletal 6A [Source:SWISS;Acc:Q4FZU2]	179	5.69	-4.98	0.0038	0.258627	yes	DOWN	N	N	Y	Y	Y	193.88	5.3
TBIG025905	ENSRNOG00000004527	Lin7a	lin-7 homolog a (C. elegans) [Source:RGD Symbol;Acc:621256]	1.37	0	#NAME?	0.0038	0.258627	yes	DOWN	N	N	Y	Y	Y	1.48	0
TBIG003512	XLOC_003512	-	-	0.66	0	#NAME?	0.00385	0.258627	yes	DOWN	N	N	Y	Y	Y	0.71	0
TBIG025972	ENSRNOG00000004459	Sdr9c7	short chain dehydrogenase/reductase family 9C, member 7 [Source:RGD Symbol;Acc:628716]	1.58	0	#NAME?	0.00385	0.258627	yes	DOWN	N	N	Y	Y	Y	1.71	0
TBIG030370	XLOC_030370	-	-	0.999	0	#NAME?	0.00385	0.258627	yes	DOWN	N	N	Y	Y	Y	1.08	0
TBIG030993	ENSRNOG00000026379.L01	AABR06108800.1	Uncharacterized protein [Source:UniProtKB/TrEMBL;Acc:F1M4F6]	0.692	0	#NAME?	0.0039	0.258627	yes	DOWN	N	N	Y	Y	Y	0.75	0
TBIG006508	XLOC_006508	-	-	0.853	0	#NAME?	0.00395	0.258627	yes	DOWN	N	N	Y	Y	Y	0.92	0
TBIG006740	ENSRNOG00000033933	Stfa3	stefin A3 [Source:RGD Symbol;Acc:1307831]	102	9.46	-3.44	0.00395	0.258627	yes	DOWN	N	N	Y	Y	Y	110.66	8.8
TBIG010129	XLOC_010129	-	-	0.854	0	#NAME?	0.004	0.258627	yes	DOWN	N	N	Y	Y	Y	0.92	0
TBIG027035	XLOC_027035	pol	Pol polyprotein [Source:SWISS;Acc:P10272]	2.91	0	#NAME?	0.004	0.258627	yes	DOWN	N	N	Y	Y	Y	3.15	0
TBIG007015	XLOC_007015	MYH15	Myosin-15 [Source:SWISS;Acc:Q9Y2K3]	8.08	0	#NAME?	0.0042	0.258627	yes	DOWN	N	N	Y	Y	Y	8.72	0
TBIG007311	XLOC_007311	-	-	1.01	0	#NAME?	0.0042	0.258627	yes	DOWN	N	N	Y	Y	Y	1.09	0
TBIG012226	XLOC_012226	-	-	1.45	0	#NAME?	0.0042	0.258627	yes	DOWN	N	N	Y	Y	Y	1.56	0
TBIG021349	ENSRNOG00000013203	LOC312273	Trypsin V-A [Source:RGD Symbol;Acc:1563848]	1.48	0	#NAME?	0.0042	0.258627	yes	DOWN	N	N	Y	Y	Y	1.6	0
TBIG024024	XLOC_024024	-	-	5.53	0	#NAME?	0.0042	0.258627	yes	DOWN	N	N	Y	Y	Y	5.97	0
TBIG022858	ENSRNOG00000017024	Pla2g2e	phospholipase A2, group IIE [Source:RGD Symbol;Acc:1309611]	1.13	0	#NAME?	0.0042	0.258627	yes	DOWN	N	N	Y	Y	Y	1.22	0
TBIG030539	XLOC_030539	Ace2	Angiotensin-converting enzyme 2 [Source:SWISS;Acc:Q5EGZ1]	39	0	#NAME?	0.0042	0.258627	yes	DOWN	N	N	Y	Y	Y	42.09	0
TBIG001711	ENSRNOG00000015321	Moxd1	monooxygenase, DBH-like 1 [Source:RGD Symbol;Acc:1310033]	9.94	1.43	-2.8	0.00445	0.258627	yes	DOWN	N	N	Y	Y	Y	10.74	1.33
TBIG010742	ENSRNOG00000010516.L01	Plau	plasminogen activator, urokinase [Source:RGD Symbol;Acc:3343]	60.1	12.8	-2.23	0.0045	0.258627	yes	DOWN	N	N	Y	Y	Y	64.97	11.94
TBIG027724	ENSRNOG00000021771.L01	Trim29	tripartite motif-containing 29 [Source:RGD Symbol;Acc:1307858]	91	21.1	-2.11	0.0045	0.258627	yes	DOWN	N	N	Y	Y	Y	98.34	19.64
TBIG018854	ENSRNOG00000009531.L01	Col9a3	collagen, type IX, alpha 3 [Source:RGD Symbol;Acc:1310255]	24.3	5.07	-2.26	0.0046	0.258627	yes	DOWN	N	N	Y	Y	Y	26.26	4.71
TBIG009070	XLOC_009070	-	-	0.841	0	#NAME?	0.00465	0.258627	yes	DOWN	N	N	Y	Y	Y	0.91	0
TBIG020069	XLOC_020069	-	-	1.14	0	#NAME?	0.00465	0.258627	yes	DOWN	N	N	Y	Y	Y	1.23	0
TBIG006244	XLOC_006244	-	-	1.64	0	#NAME?	0.00475	0.258627	yes	DOWN	N	N	Y	Y	Y	1.77	0
TBIG009151	XLOC_009151	-	-	0.992	0	#NAME?	0.00475	0.258627	yes	DOWN	N	N	Y	Y	Y	1.07	0
TBIG027749	ENSRNOG00000016397.L01	Tmprss13	transmembrane protease, serine 13 [Source:RGD Symbol;Acc:1310872]	19	3.25	-2.54	0.00475	0.258627	yes	DOWN	N	N	Y	Y	Y	20.49	3.03
TBIG030369	XLOC_030369	-	-	0.734	0	#NAME?	0.00475	0.258627	yes	DOWN	N	N	Y	Y	Y	0.79	0
TBIG018452	ENSRNOG00000045829.L01	Thbs1	thrombospondin 1 [Source:RGD Symbol;Acc:1588455]	25.8	5.91	-2.13	0.0048	0.258627	yes	DOWN	N	N	Y	Y	Y	27.91	5.5
TBIG028655	ENSRNOG00000009945.L01	Pls1	plastin 1 [Source:RGD Symbol;Acc:1307142]	21.6	5.31	-2.02	0.0048	0.258627	yes	DOWN	N	N	Y	Y	Y	23.28	4.95
TBIG007310	XLOC_007310	-	-	1.63	0	#NAME?	0.0049	0.258627	yes	DOWN	N	N	Y	Y	Y	1.76	0
TBIG007333	XLOC_007333	-	-	1.23	0	#NAME?	0.0049	0.258627	yes	DOWN	N	N	Y	Y	Y	1.33	0
TBIG008761	XLOC_008761	-	-	2.21	0	#NAME?	0.0049	0.258627	yes	DOWN	N	N	Y	Y	Y	2.39	0
TBIG009184	XLOC_009184	-	-	1.03	0	#NAME?	0.0049	0.258627	yes	DOWN	N	N	Y	Y	Y	1.11	0
TBIG009198	XLOC_009198	-	-	1.71	0	#NAME?	0.0049	0.258627	yes	DOWN	N	N	Y	Y	Y	1.85	0
TBIG013217	XLOC_013217	-	-	0.781	0	#NAME?	0.0049	0.258627	yes	DOWN	N	N	Y	Y	Y	0.84	0
TBIG014732	XLOC_014732	-	-	1.45	0	#NAME?	0.0049	0.258627	yes	DOWN	N	N	Y	Y	Y	1.57	0
TBIG016596	XLOC_016596	-	-	0.914	0	#NAME?	0.0049	0.258627	yes	DOWN	N	N	Y	Y	Y	0.99	0
TBIG015646	ENSRNOG00000009339.L01	Cenpe	centromere protein E [Source:RGD Symbol;Acc:1307115]	2.23	0.209	-3.42	0.0049	0.258627	yes	DOWN	N	N	Y	Y	Y	2.41	0.19
TBIG022248	XLOC_022248	-	-	1.02	0	#NAME?	0.0049	0.258627	yes	DOWN	N	N	Y	Y	Y	1.1	0
TBIG023747	XLOC_023747	-	-	2.46	0	#NAME?	0.0049	0.258627	yes	DOWN	N	N	Y	Y	Y	2.66	0
TBIG025369	XLOC_025369	-	-	1.37	0	#NAME?	0.0049	0.258627	yes	DOWN	N	N	Y	Y	Y	1.48	0
TBIG030228	XLOC_030228	-	-	2.29	0	#NAME?	0.0049	0.258627	yes	DOWN	N	N	Y	Y	Y	2.47	0
TBIG030237	XLOC_030237	-	-	1.58	0	#NAME?	0.0049	0.258627	yes	DOWN	N	N	Y	Y	Y	1.71	0
TBIG003948	XLOC_003948	-	-	0.688	0	#NAME?	0.00495	0.258627	yes	DOWN	N	N	Y	Y	Y	0.74	0
TBIG004083	XLOC_004083	-	-	0.852	0	#NAME?	0.00495	0.258627	yes	DOWN	N	N	Y	Y	Y	0.92	0
TBIG004086	XLOC_004086	-	-	1.39	0	#NAME?	0.00495	0.258627	yes	DOWN	N	N	Y	Y	Y	1.5	0
TBIG006454	XLOC_006454	-	-	1.01	0	#NAME?	0.00495	0.258627	yes	DOWN	N	N	Y	Y	Y	1.09	0
TBIG009073	XLOC_009073	Pol	Retrovirus-related Pol polyprotein LINE-1 [Source:SWISS;Acc:P11369]	0.725	0	#NAME?	0.00495	0.258627	yes	DOWN	N	N	Y	Y	Y	0.78	0
TBIG009149	XLOC_009149	-	-	0.568	0	#NAME?	0.00495	0.258627	yes	DOWN	N	N	Y	Y	Y	0.61	0
TBIG009286	XLOC_009286	-	-	56.3	0	#NAME?	0.00495	0.258627	yes	DOWN	N	N	Y	Y	Y	60.81	0
TBIG010193	XLOC_010193	-	-	1.12	0	#NAME?	0.00495	0.258627	yes	DOWN	N	N	Y	Y	Y	1.22	0
TBIG010245	XLOC_010245	-	-	1.84	0	#NAME?	0.00495	0.258627	yes	DOWN	N	N	Y	Y	Y	1.99	0
TBIG010249	XLOC_010249	-	-	0.848	0	#NAME?	0.00495	0.258627	yes	DOWN	N	N	Y	Y	Y	0.92	0
TBIG013077	XLOC_013077	-	-	4.64	0	#NAME?	0.00495	0.258627	yes	DOWN	N	N	Y	Y	Y	5.02	0
TBIG013241	XLOC_013241	-	-	0.906	0	#NAME?	0.00495	0.258627	yes	DOWN	N	N	Y	Y	Y	0.98	0
TBIG014799	XLOC_014799	-	-	3.06	0	#NAME?	0.00495	0.258627	yes	DOWN	N	N	Y	Y	Y	3.31	0
TBIG016759	XLOC_016759	-	-	0.766	0	#NAME?	0.00495	0.258627	yes	DOWN	N	N	Y	Y	Y	0.83	0
TBIG016844	XLOC_016844	-	-	2.35	0	#NAME?	0.00495	0.258627	yes	DOWN	N	N	Y	Y	Y	2.54	0
TBIG017581	XLOC_017581	-	-	0.703	0	#NAME?	0.00495	0.258627	yes	DOWN	N	N	Y	Y	Y	0.76	0
TBIG020021	XLOC_020021	-	-	0.913	0	#NAME?	0.00495	0.258627	yes	DOWN	N	N	Y	Y	Y	0.99	0
TBIG020102	XLOC_020102	-	-	1.23	0	#NAME?	0.00495	0.258627	yes	DOWN	N	N	Y	Y	Y	1.32	0
TBIG019442	XLOC_019442	Ryr3	Ryanodine receptor 3 [Source:SWISS;Acc:A2AGL3]	1.43	0	#NAME?	0.00495	0.258627	yes	DOWN	N	N	Y	Y	Y	1.54	0
TBIG020315	XLOC_020315	-	-	1.65	0	#NAME?	0.00495	0.258627	yes	DOWN	N	N	Y	Y	Y	1.78	0
TBIG021979	XLOC_021979	-	-	1.44	0	#NAME?	0.00495	0.258627	yes	DOWN	N	N	Y	Y	Y	1.55	0
TBIG021678	XLOC_021678	-	-	0.73	0	#NAME?	0.00495	0.258627	yes	DOWN	N	N	Y	Y	Y	0.79	0
TBIG024039	XLOC_024039	-	-	0.99	0	#NAME?	0.00495	0.258627	yes	DOWN	N	N	Y	Y	Y	1.07	0
TBIG025478	XLOC_025478	-	-	0.932	0	#NAME?	0.00495	0.258627	yes	DOWN	N	N	Y	Y	Y	1.01	0
TBIG027484	XLOC_027484	-	-	1.02	0	#NAME?	0.00495	0.258627	yes	DOWN	N	N	Y	Y	Y	1.11	0
TBIG030449	XLOC_030449	-	-	0.852	0	#NAME?	0.00495	0.258627	yes	DOWN	N	N	Y	Y	Y	0.92	0
TBIG030490	XLOC_030490	-	-	1.09	0	#NAME?	0.00495	0.258627	yes	DOWN	N	N	Y	Y	Y	1.18	0
TBIG031506	XLOC_031506	-	-	0.572	0	#NAME?	0.00495	0.258627	yes	DOWN	N	N	Y	Y	Y	0.62	0
TBIG028530	ENSRNOG00000014080.L01	Kif23	kinesin family member 23 [Source:RGD Symbol;Acc:1308596]	20.7	4.39	-2.24	0.005	0.258627	yes	DOWN	N	N	Y	Y	Y	22.37	4.09
TBIG015331	ENSRNOG00000010866.L01	Tmem154	transmembrane protein 154 [Source:RGD Symbol;Acc:1563262]	26.8	5.78	-2.21	0.00505	0.258627	yes	DOWN	N	N	Y	Y	Y	28.92	5.39
TBIG004091	XLOC_004091	-	-	1.75	0	#NAME?	0.0052	0.258627	yes	DOWN	N	N	Y	Y	Y	1.9	0
TBIG007325	XLOC_007325	-	-	0.693	0	#NAME?	0.0052	0.258627	yes	DOWN	N	N	Y	Y	Y	0.75	0
TBIG008255	XLOC_008255	-	-	1.49	0	#NAME?	0.0052	0.258627	yes	DOWN	N	N	Y	Y	Y	1.61	0
TBIG009069	XLOC_009069	TR22_MOUSE	Putative transposase element L1Md-A101/L1Md-A102/L1Md-A2 [Source:SWISS;Acc:P11260]	0.847	0	#NAME?	0.0052	0.258627	yes	DOWN	N	N	Y	Y	Y	0.92	0
TBIG008389	ENSRNOG00000003183	Fmod	fibromodulin [Source:RGD Symbol;Acc:619769]	23.8	4.66	-2.35	0.0052	0.258627	yes	DOWN	N	N	Y	Y	Y	25.71	4.33
TBIG013144	XLOC_013144	-	-	1.58	0	#NAME?	0.0052	0.258627	yes	DOWN	N	N	Y	Y	Y	1.71	0
TBIG014048	XLOC_014048	-	-	0.906	0	#NAME?	0.0052	0.258627	yes	DOWN	N	N	Y	Y	Y	0.98	0
TBIG027471	XLOC_027471	-	-	1.32	0	#NAME?	0.0052	0.258627	yes	DOWN	N	N	Y	Y	Y	1.43	0
TBIG027472	XLOC_027472	-	-	0.597	0	#NAME?	0.0052	0.258627	yes	DOWN	N	N	Y	Y	Y	0.65	0
TBIG031547	XLOC_031547	-	-	1.01	0	#NAME?	0.0052	0.258627	yes	DOWN	N	N	Y	Y	Y	1.09	0
TBIG010627	ENSRNOG00000015075.L01	Stc1	stanniocalcin 1 [Source:RGD Symbol;Acc:621776]	5.83	0.869	-2.75	0.00525	0.258627	yes	DOWN	N	N	Y	Y	Y	6.3	0.81
TBIG024553	ENSRNOG00000012094.L01	Ltbp2	latent transforming growth factor beta binding protein 2 [Source:RGD Symbol;Acc:68380]	10.1	2.02	-2.31	0.00525	0.258627	yes	DOWN	N	N	Y	Y	Y	10.88	1.88
TBIG030018	ENSRNOG00000027430.L01	Ikzf2	IKAROS family zinc finger 2 [Source:RGD Symbol;Acc:1308686]	30.3	7.26	-2.06	0.0054	0.258627	yes	DOWN	N	N	Y	Y	Y	32.76	6.77
TBIG001689	XLOC_001689	Arfgef3	Brefeldin A-inhibited guanine nucleotide-exchange protein 3 [Source:SWISS;Acc:Q3UGY8]	2.37	0	#NAME?	0.00545	0.258627	yes	DOWN	N	N	Y	Y	Y	2.56	0
TBIG003506	XLOC_003506	-	-	1	0	#NAME?	0.00545	0.258627	yes	DOWN	N	N	Y	Y	Y	1.08	0
TBIG003800	XLOC_003800	-	-	1.33	0	#NAME?	0.00545	0.258627	yes	DOWN	N	N	Y	Y	Y	1.44	0
TBIG006157	XLOC_006157	-	-	3.71	0	#NAME?	0.00545	0.258627	yes	DOWN	N	N	Y	Y	Y	4.01	0
TBIG008669	XLOC_008669	-	-	46	0	#NAME?	0.00545	0.258627	yes	DOWN	N	N	Y	Y	Y	49.72	0
TBIG010313	XLOC_010313	-	-	4.38	0	#NAME?	0.00545	0.258627	yes	DOWN	N	N	Y	Y	Y	4.73	0
TBIG013040	XLOC_013040	-	-	0.69	0	#NAME?	0.00545	0.258627	yes	DOWN	N	N	Y	Y	Y	0.75	0
TBIG013082	XLOC_013082	Gpr125	Probable G-protein coupled receptor 125 [Source:SWISS;Acc:Q7TT36]	0.739	0	#NAME?	0.00545	0.258627	yes	DOWN	N	N	Y	Y	Y	0.8	0
TBIG013215	XLOC_013215	-	-	1	0	#NAME?	0.00545	0.258627	yes	DOWN	N	N	Y	Y	Y	1.08	0
TBIG014648	XLOC_014648	-	-	2.1	0	#NAME?	0.00545	0.258627	yes	DOWN	N	N	Y	Y	Y	2.27	0
TBIG016881	XLOC_016881	-	-	0.916	0	#NAME?	0.00545	0.258627	yes	DOWN	N	N	Y	Y	Y	0.99	0
TBIG023841	XLOC_023841	-	-	1.2	0	#NAME?	0.00545	0.258627	yes	DOWN	N	N	Y	Y	Y	1.3	0
TBIG025359	XLOC_025359	-	-	1.68	0	#NAME?	0.00545	0.258627	yes	DOWN	N	N	Y	Y	Y	1.82	0
TBIG025391	XLOC_025391	-	-	2.56	0	#NAME?	0.00545	0.258627	yes	DOWN	N	N	Y	Y	Y	2.77	0
TBIG025510	XLOC_025510	-	-	0.715	0	#NAME?	0.00545	0.258627	yes	DOWN	N	N	Y	Y	Y	0.77	0
TBIG025511	XLOC_025511	-	-	0.827	0	#NAME?	0.00545	0.258627	yes	DOWN	N	N	Y	Y	Y	0.89	0
TBIG027330	XLOC_027330	-	-	1.14	0	#NAME?	0.00545	0.258627	yes	DOWN	N	N	Y	Y	Y	1.23	0
TBIG029462	XLOC_029462	-	-	1.41	0	#NAME?	0.00545	0.258627	yes	DOWN	N	N	Y	Y	Y	1.52	0
TBIG008327	ENSRNOG00000002417.L01	Serpinb10	serpin peptidase inhibitor, clade B (ovalbumin), member 10 [Source:RGD Symbol;Acc:628853]	89	21.1	-2.08	0.00555	0.258627	yes	DOWN	N	N	Y	Y	Y	96.08	19.65
TBIG031430	ENSRNOG00000022684	Gpc3	glypican 3 [Source:RGD Symbol;Acc:2725]	92.4	21.9	-2.08	0.0056	0.258627	yes	DOWN	N	N	Y	Y	Y	99.79	20.36
TBIG008966	ENSRNOG00000042299.L01	AABR06076389.1	Uncharacterized protein [Source:UniProtKB/TrEMBL;Acc:D3ZAY5]	0.743	0	#NAME?	0.00565	0.258627	yes	DOWN	N	N	Y	Y	Y	0.8	0
TBIG018208	ENSRNOG00000001514	Cdca7	cell division cycle associated 7 [Source:RGD Symbol;Acc:1309363]	31.3	7.59	-2.04	0.00575	0.258627	yes	DOWN	N	N	Y	Y	Y	33.84	7.07
TBIG024508	ENSRNOG00000005220.L01	Syne2	spectrin repeat containing, nuclear envelope 2 [Source:RGD Symbol;Acc:1305248]	13.4	3.39	-1.98	0.0063	0.258627	yes	DOWN	N	N	Y	Y	Y	14.49	3.16
TBIG003472	XLOC_003472	-	-	4.68	0	#NAME?	0.00645	0.258627	yes	DOWN	N	N	Y	Y	Y	5.06	0
TBIG004188	XLOC_004188	-	-	0.865	0	#NAME?	0.00645	0.258627	yes	DOWN	N	N	Y	Y	Y	0.94	0
TBIG006210	XLOC_006210	PGBD2	PiggyBac transposable element-derived protein 2 [Source:SWISS;Acc:Q6P3X8]	1.38	0	#NAME?	0.00645	0.258627	yes	DOWN	N	N	Y	Y	Y	1.49	0
TBIG006427	XLOC_006427	-	-	0.984	0	#NAME?	0.00645	0.258627	yes	DOWN	N	N	Y	Y	Y	1.06	0
TBIG006893	ENSRNOG00000048513	AABR06067067.1	Uncharacterized protein [Source:UniProtKB/TrEMBL;Acc:D3ZEC8]	3.94	0	#NAME?	0.00645	0.258627	yes	DOWN	N	N	Y	Y	Y	4.26	0
TBIG009087	XLOC_009087	-	-	0.964	0	#NAME?	0.00645	0.258627	yes	DOWN	N	N	Y	Y	Y	1.04	0
TBIG009108	XLOC_009108	-	-	0.752	0	#NAME?	0.00645	0.258627	yes	DOWN	N	N	Y	Y	Y	0.81	0
TBIG009118	XLOC_009118	-	-	2.85	0	#NAME?	0.00645	0.258627	yes	DOWN	N	N	Y	Y	Y	3.08	0
TBIG009221	XLOC_009221	-	-	0.697	0	#NAME?	0.00645	0.258627	yes	DOWN	N	N	Y	Y	Y	0.75	0
TBIG011135	XLOC_011135	-	-	1.52	0	#NAME?	0.00645	0.258627	yes	DOWN	N	N	Y	Y	Y	1.64	0
TBIG012068	XLOC_012068	-	-	0.924	0	#NAME?	0.00645	0.258627	yes	DOWN	N	N	Y	Y	Y	1	0
TBIG012113	XLOC_012113	-	-	0.764	0	#NAME?	0.00645	0.258627	yes	DOWN	N	N	Y	Y	Y	0.83	0
TBIG012154	XLOC_012154	-	-	1.03	0	#NAME?	0.00645	0.258627	yes	DOWN	N	N	Y	Y	Y	1.11	0
TBIG012180	XLOC_012180	-	-	0.925	0	#NAME?	0.00645	0.258627	yes	DOWN	N	N	Y	Y	Y	1	0
TBIG012999	XLOC_012999	-	-	1.42	0	#NAME?	0.00645	0.258627	yes	DOWN	N	N	Y	Y	Y	1.53	0
TBIG012393	XLOC_012393	-	-	2.72	0	#NAME?	0.00645	0.258627	yes	DOWN	N	N	Y	Y	Y	2.94	0
TBIG013214	XLOC_013214	-	-	0.606	0	#NAME?	0.00645	0.258627	yes	DOWN	N	N	Y	Y	Y	0.66	0
TBIG013951	XLOC_013951	-	-	1.52	0	#NAME?	0.00645	0.258627	yes	DOWN	N	N	Y	Y	Y	1.64	0
TBIG016602	XLOC_016602	-	-	1.05	0	#NAME?	0.00645	0.258627	yes	DOWN	N	N	Y	Y	Y	1.13	0
TBIG016704	XLOC_016704	-	-	2.72	0	#NAME?	0.00645	0.258627	yes	DOWN	N	N	Y	Y	Y	2.94	0
TBIG016717	XLOC_016717	-	-	2.85	0	#NAME?	0.00645	0.258627	yes	DOWN	N	N	Y	Y	Y	3.08	0
TBIG016787	XLOC_016787	-	-	1.04	0	#NAME?	0.00645	0.258627	yes	DOWN	N	N	Y	Y	Y	1.12	0
TBIG016877	XLOC_016877	-	-	1.25	0	#NAME?	0.00645	0.258627	yes	DOWN	N	N	Y	Y	Y	1.35	0
TBIG016963	XLOC_016963	-	-	0.551	0	#NAME?	0.00645	0.258627	yes	DOWN	N	N	Y	Y	Y	0.6	0
TBIG019939	XLOC_019939	-	-	6.79	0	#NAME?	0.00645	0.258627	yes	DOWN	N	N	Y	Y	Y	7.33	0
TBIG018406	XLOC_018406	-	-	0.908	0	#NAME?	0.00645	0.258627	yes	DOWN	N	N	Y	Y	Y	0.98	0
TBIG020277	XLOC_020277	-	-	1.97	0	#NAME?	0.00645	0.258627	yes	DOWN	N	N	Y	Y	Y	2.13	0
TBIG021919	XLOC_021919	Pol	Retrovirus-related Pol polyprotein LINE-1 [Source:SWISS;Acc:P11369]	1.22	0	#NAME?	0.00645	0.258627	yes	DOWN	N	N	Y	Y	Y	1.32	0
TBIG022014	XLOC_022014	-	-	0.899	0	#NAME?	0.00645	0.258627	yes	DOWN	N	N	Y	Y	Y	0.97	0
TBIG022064	XLOC_022064	-	-	0.593	0	#NAME?	0.00645	0.258627	yes	DOWN	N	N	Y	Y	Y	0.64	0
TBIG023840	XLOC_023840	-	-	0.883	0	#NAME?	0.00645	0.258627	yes	DOWN	N	N	Y	Y	Y	0.95	0
TBIG025497	XLOC_025497	-	-	0.964	0	#NAME?	0.00645	0.258627	yes	DOWN	N	N	Y	Y	Y	1.04	0
TBIG025609	XLOC_025609	-	-	2.86	0	#NAME?	0.00645	0.258627	yes	DOWN	N	N	Y	Y	Y	3.09	0
TBIG027272	XLOC_027272	-	-	0.773	0	#NAME?	0.00645	0.258627	yes	DOWN	N	N	Y	Y	Y	0.84	0
TBIG026939	XLOC_026939	-	-	0.903	0	#NAME?	0.00645	0.258627	yes	DOWN	N	N	Y	Y	Y	0.97	0
TBIG030371	XLOC_030371	-	-	0.77	0	#NAME?	0.00645	0.258627	yes	DOWN	N	N	Y	Y	Y	0.83	0
TBIG030461	XLOC_030461	-	-	0.906	0	#NAME?	0.00645	0.258627	yes	DOWN	N	N	Y	Y	Y	0.98	0
TBIG031512	XLOC_031512	-	-	2.41	0	#NAME?	0.00645	0.258627	yes	DOWN	N	N	Y	Y	Y	2.6	0
TBIG011482	ENSRNOG00000017156.L01	Ankle1	ankyrin repeat and LEM domain containing 1 [Source:RGD Symbol;Acc:1308184]	4.92	0.67	-2.88	0.0066	0.258627	yes	DOWN	N	N	Y	Y	Y	5.32	0.62
TBIG029379	ENSRNOG00000012535	Gpr115	G protein-coupled receptor 115 [Source:RGD Symbol;Acc:1565216]	14.6	1.15	-3.67	0.00665	0.258627	yes	DOWN	N	N	Y	Y	Y	15.73	1.07
TBIG000718	ENSRNOG00000013057.L01	Prc1	protein regulator of cytokinesis 1 [Source:RGD Symbol;Acc:1311754]	15.6	2.11	-2.89	0.00675	0.258627	yes	DOWN	N	N	Y	Y	Y	16.84	1.96
TBIG010645	ENSRNOG00000010555.L01	LOC102551958	phytanoyl-CoA hydroxylase-interacting protein-like [Source:RGD Symbol;Acc:7719585]	36.7	9.53	-1.95	0.00675	0.258627	yes	DOWN	N	N	Y	Y	Y	39.69	8.87
TBIG026504	ENSRNOG00000008885.L01	Chst11	carbohydrate (chondroitin 4) sulfotransferase 11 [Source:RGD Symbol;Acc:1308400]	6.03	1.18	-2.35	0.00675	0.258627	yes	DOWN	N	N	Y	Y	Y	6.52	1.1
TBIG005835	ENSRNOG00000026371	Krt17	keratin 17 [Source:RGD Symbol;Acc:1303181]	238	57.6	-2.05	0.00695	0.258627	yes	DOWN	N	N	Y	Y	Y	257.21	53.53
TBIG003363	XLOC_003363	-	-	35	0	#NAME?	0.007	0.258627	yes	DOWN	N	N	Y	Y	Y	37.77	0
TBIG003549	XLOC_003549	-	-	1.44	0	#NAME?	0.007	0.258627	yes	DOWN	N	N	Y	Y	Y	1.56	0
TBIG003745	XLOC_003745	-	-	3.15	0	#NAME?	0.007	0.258627	yes	DOWN	N	N	Y	Y	Y	3.4	0
TBIG003828	XLOC_003828	LIN1_NYCCO	LINE-1 reverse transcriptase homolog [Source:SWISS;Acc:P08548]	0.68	0	#NAME?	0.007	0.258627	yes	DOWN	N	N	Y	Y	Y	0.74	0
TBIG004038	XLOC_004038	env	Envelope glycoprotein [Source:SWISS;Acc:P26804]	1.97	0	#NAME?	0.007	0.258627	yes	DOWN	N	N	Y	Y	Y	2.13	0
TBIG004084	XLOC_004084	-	-	1.23	0	#NAME?	0.007	0.258627	yes	DOWN	N	N	Y	Y	Y	1.33	0
TBIG004127	XLOC_004127	-	-	14	0	#NAME?	0.007	0.258627	yes	DOWN	N	N	Y	Y	Y	15.14	0
TBIG004134	XLOC_004134	-	-	0.692	0	#NAME?	0.007	0.258627	yes	DOWN	N	N	Y	Y	Y	0.75	0
TBIG003202	XLOC_003202	-	-	9.64	0	#NAME?	0.007	0.258627	yes	DOWN	N	N	Y	Y	Y	10.42	0
TBIG006128	XLOC_006128	-	-	1.45	0	#NAME?	0.007	0.258627	yes	DOWN	N	N	Y	Y	Y	1.57	0
TBIG006264	XLOC_006264	-	-	0.848	0	#NAME?	0.007	0.258627	yes	DOWN	N	N	Y	Y	Y	0.92	0
TBIG006319	XLOC_006319	-	-	1.46	0	#NAME?	0.007	0.258627	yes	DOWN	N	N	Y	Y	Y	1.58	0
TBIG006366	XLOC_006366	-	-	0.914	0	#NAME?	0.007	0.258627	yes	DOWN	N	N	Y	Y	Y	0.99	0
TBIG007205	XLOC_007205	-	-	1.44	0	#NAME?	0.007	0.258627	yes	DOWN	N	N	Y	Y	Y	1.55	0
TBIG007312	XLOC_007312	-	-	0.562	0	#NAME?	0.007	0.258627	yes	DOWN	N	N	Y	Y	Y	0.61	0
TBIG007327	XLOC_007327	-	-	0.617	0	#NAME?	0.007	0.258627	yes	DOWN	N	N	Y	Y	Y	0.67	0
TBIG008116	XLOC_008116	Nedd4	E3 ubiquitin-protein ligase NEDD4 [Source:SWISS;Acc:P46935]	1.35	0	#NAME?	0.007	0.258627	yes	DOWN	N	N	Y	Y	Y	1.46	0
TBIG008176	XLOC_008176	-	-	2.95	0	#NAME?	0.007	0.258627	yes	DOWN	N	N	Y	Y	Y	3.18	0
TBIG008179	XLOC_008179	-	-	12.4	0	#NAME?	0.007	0.258627	yes	DOWN	N	N	Y	Y	Y	13.45	0
TBIG009068	XLOC_009068	Pol	Retrovirus-related Pol polyprotein LINE-1 [Source:SWISS;Acc:P11369]	0.932	0	#NAME?	0.007	0.258627	yes	DOWN	N	N	Y	Y	Y	1.01	0
TBIG009074	XLOC_009074	gag	Glycosylated Gag polyprotein [Source:SWISS;Acc:Q8UN02]	1.87	0	#NAME?	0.007	0.258627	yes	DOWN	N	N	Y	Y	Y	2.02	0
TBIG010160	XLOC_010160	-	-	0.859	0	#NAME?	0.007	0.258627	yes	DOWN	N	N	Y	Y	Y	0.93	0
TBIG010290	XLOC_010290	-	-	1.5	0	#NAME?	0.007	0.258627	yes	DOWN	N	N	Y	Y	Y	1.62	0
TBIG011240	XLOC_011240	-	-	1.09	0	#NAME?	0.007	0.258627	yes	DOWN	N	N	Y	Y	Y	1.18	0
TBIG011287	XLOC_011287	-	-	0.773	0	#NAME?	0.007	0.258627	yes	DOWN	N	N	Y	Y	Y	0.84	0
TBIG012055	XLOC_012055	-	-	3.62	0	#NAME?	0.007	0.258627	yes	DOWN	N	N	Y	Y	Y	3.91	0
TBIG012184	XLOC_012184	-	-	3.02	0	#NAME?	0.007	0.258627	yes	DOWN	N	N	Y	Y	Y	3.26	0
TBIG012243	XLOC_012243	-	-	1.45	0	#NAME?	0.007	0.258627	yes	DOWN	N	N	Y	Y	Y	1.56	0
TBIG013182	XLOC_013182	-	-	1.12	0	#NAME?	0.007	0.258627	yes	DOWN	N	N	Y	Y	Y	1.21	0
TBIG013196	XLOC_013196	-	-	1.12	0	#NAME?	0.007	0.258627	yes	DOWN	N	N	Y	Y	Y	1.21	0
TBIG013829	XLOC_013829	Pol	Retrovirus-related Pol polyprotein LINE-1 [Source:SWISS;Acc:P11369]	1.29	0	#NAME?	0.007	0.258627	yes	DOWN	N	N	Y	Y	Y	1.39	0
TBIG013858	XLOC_013858	-	-	0.904	0	#NAME?	0.007	0.258627	yes	DOWN	N	N	Y	Y	Y	0.98	0
TBIG013869	XLOC_013869	-	-	1.27	0	#NAME?	0.007	0.258627	yes	DOWN	N	N	Y	Y	Y	1.37	0
TBIG014762	XLOC_014762	-	-	0.7	0	#NAME?	0.007	0.258627	yes	DOWN	N	N	Y	Y	Y	0.76	0
TBIG016638	XLOC_016638	-	-	0.634	0	#NAME?	0.007	0.258627	yes	DOWN	N	N	Y	Y	Y	0.69	0
TBIG016674	XLOC_016674	-	-	0.981	0	#NAME?	0.007	0.258627	yes	DOWN	N	N	Y	Y	Y	1.06	0
TBIG016760	XLOC_016760	env	Envelope glycoprotein gp70 [Source:SWISS;Acc:P03374]	0.597	0	#NAME?	0.007	0.258627	yes	DOWN	N	N	Y	Y	Y	0.65	0
TBIG016846	XLOC_016846	-	-	3.5	0	#NAME?	0.007	0.258627	yes	DOWN	N	N	Y	Y	Y	3.78	0
TBIG016912	XLOC_016912	-	-	1.62	0	#NAME?	0.007	0.258627	yes	DOWN	N	N	Y	Y	Y	1.75	0
TBIG016967	XLOC_016967	-	-	3.79	0	#NAME?	0.007	0.258627	yes	DOWN	N	N	Y	Y	Y	4.09	0
TBIG017769	XLOC_017769	-	-	1.1	0	#NAME?	0.007	0.258627	yes	DOWN	N	N	Y	Y	Y	1.19	0
TBIG017819	XLOC_017819	-	-	1.52	0	#NAME?	0.007	0.258627	yes	DOWN	N	N	Y	Y	Y	1.64	0
TBIG017844	XLOC_017844	-	-	1.93	0	#NAME?	0.007	0.258627	yes	DOWN	N	N	Y	Y	Y	2.09	0
TBIG019877	XLOC_019877	-	-	0.639	0	#NAME?	0.007	0.258627	yes	DOWN	N	N	Y	Y	Y	0.69	0
TBIG019947	XLOC_019947	-	-	0.657	0	#NAME?	0.007	0.258627	yes	DOWN	N	N	Y	Y	Y	0.71	0
TBIG019974	XLOC_019974	-	-	1.33	0	#NAME?	0.007	0.258627	yes	DOWN	N	N	Y	Y	Y	1.44	0
TBIG020037	XLOC_020037	-	-	12.2	0	#NAME?	0.007	0.258627	yes	DOWN	N	N	Y	Y	Y	13.21	0
TBIG018408	XLOC_018408	-	-	1.28	0	#NAME?	0.007	0.258627	yes	DOWN	N	N	Y	Y	Y	1.39	0
TBIG019580	ENSRNOG00000021274.L01	Fermt1	fermitin family member 1 [Source:RGD Symbol;Acc:1306816]	13	3.29	-1.98	0.007	0.258627	yes	DOWN	N	N	Y	Y	Y	14.08	3.07
TBIG020214	XLOC_020214	-	-	2.43	0	#NAME?	0.007	0.258627	yes	DOWN	N	N	Y	Y	Y	2.63	0
TBIG020330	XLOC_020330	HCG22	Protein PBMUCL2 [Source:SWISS;Acc:E2RYF7]	1.79	0	#NAME?	0.007	0.258627	yes	DOWN	N	N	Y	Y	Y	1.93	0
TBIG021920	XLOC_021920	-	-	1.18	0	#NAME?	0.007	0.258627	yes	DOWN	N	N	Y	Y	Y	1.28	0
TBIG022149	XLOC_022149	-	-	1.92	0	#NAME?	0.007	0.258627	yes	DOWN	N	N	Y	Y	Y	2.08	0
TBIG022174	XLOC_022174	-	-	1.21	0	#NAME?	0.007	0.258627	yes	DOWN	N	N	Y	Y	Y	1.31	0
TBIG023906	XLOC_023906	-	-	0.915	0	#NAME?	0.007	0.258627	yes	DOWN	N	N	Y	Y	Y	0.99	0
TBIG023986	XLOC_023986	-	-	2.61	0	#NAME?	0.007	0.258627	yes	DOWN	N	N	Y	Y	Y	2.82	0
TBIG023993	XLOC_023993	-	-	0.8	0	#NAME?	0.007	0.258627	yes	DOWN	N	N	Y	Y	Y	0.86	0
TBIG024082	XLOC_024082	-	-	7.86	0	#NAME?	0.007	0.258627	yes	DOWN	N	N	Y	Y	Y	8.49	0
TBIG024107	XLOC_024107	-	-	0.711	0	#NAME?	0.007	0.258627	yes	DOWN	N	N	Y	Y	Y	0.77	0
TBIG024130	XLOC_024130	-	-	1.76	0	#NAME?	0.007	0.258627	yes	DOWN	N	N	Y	Y	Y	1.9	0
TBIG025355	XLOC_025355	-	-	0.755	0	#NAME?	0.007	0.258627	yes	DOWN	N	N	Y	Y	Y	0.82	0
TBIG025412	XLOC_025412	-	-	0.88	0	#NAME?	0.007	0.258627	yes	DOWN	N	N	Y	Y	Y	0.95	0
TBIG025479	XLOC_025479	-	-	1.1	0	#NAME?	0.007	0.258627	yes	DOWN	N	N	Y	Y	Y	1.19	0
TBIG025578	XLOC_025578	-	-	0.954	0	#NAME?	0.007	0.258627	yes	DOWN	N	N	Y	Y	Y	1.03	0
TBIG025618	XLOC_025618	-	-	0.812	0	#NAME?	0.007	0.258627	yes	DOWN	N	N	Y	Y	Y	0.88	0
TBIG027045	XLOC_027045	-	-	0.554	0	#NAME?	0.007	0.258627	yes	DOWN	N	N	Y	Y	Y	0.6	0
TBIG027111	XLOC_027111	-	-	1.41	0	#NAME?	0.007	0.258627	yes	DOWN	N	N	Y	Y	Y	1.52	0
TBIG027130	XLOC_027130	-	-	44.9	0	#NAME?	0.007	0.258627	yes	DOWN	N	N	Y	Y	Y	48.5	0
TBIG027192	XLOC_027192	-	-	2.01	0	#NAME?	0.007	0.258627	yes	DOWN	N	N	Y	Y	Y	2.17	0
TBIG027364	XLOC_027364	Nedd4	E3 ubiquitin-protein ligase NEDD4 [Source:SWISS;Acc:P46935]	1.3	0	#NAME?	0.007	0.258627	yes	DOWN	N	N	Y	Y	Y	1.4	0
TBIG027405	XLOC_027405	-	-	0.965	0	#NAME?	0.007	0.258627	yes	DOWN	N	N	Y	Y	Y	1.04	0
TBIG028968	XLOC_028968	-	-	0.955	0	#NAME?	0.007	0.258627	yes	DOWN	N	N	Y	Y	Y	1.03	0
TBIG029049	XLOC_029049	-	-	0.98	0	#NAME?	0.007	0.258627	yes	DOWN	N	N	Y	Y	Y	1.06	0
TBIG030265	XLOC_030265	-	-	1.05	0	#NAME?	0.007	0.258627	yes	DOWN	N	N	Y	Y	Y	1.13	0
TBIG029920	ENSRNOG00000018276.L01	Mgat4a	mannosyl (alpha-1,3-)-glycoprotein beta-1,4-N-acetylglucosaminyltransferase, isozyme A [Source:RGD Symbol;Acc:1305650]	22.2	5.59	-1.99	0.007	0.258627	yes	DOWN	N	N	Y	Y	Y	23.97	5.21
TBIG030292	XLOC_030292	-	-	0.8	0	#NAME?	0.007	0.258627	yes	DOWN	N	N	Y	Y	Y	0.86	0
TBIG030300	XLOC_030300	-	-	2.33	0	#NAME?	0.007	0.258627	yes	DOWN	N	N	Y	Y	Y	2.52	0
TBIG030460	XLOC_030460	Pol	Retrovirus-related Pol polyprotein LINE-1 [Source:SWISS;Acc:P11369]	1.58	0	#NAME?	0.007	0.258627	yes	DOWN	N	N	Y	Y	Y	1.71	0
TBIG031546	XLOC_031546	-	-	1.75	0	#NAME?	0.007	0.258627	yes	DOWN	N	N	Y	Y	Y	1.9	0
TBIG031559	XLOC_031559	-	-	0.805	0	#NAME?	0.007	0.258627	yes	DOWN	N	N	Y	Y	Y	0.87	0
TBIG031562	XLOC_031562	Pol	Retrovirus-related Pol polyprotein LINE-1 [Source:SWISS;Acc:P11369]	1.72	0	#NAME?	0.007	0.258627	yes	DOWN	N	N	Y	Y	Y	1.86	0
TBIG001406	ENSRNOG00000048953.L01	Spink5	serine peptidase inhibitor, Kazal type 5 [Source:RGD Symbol;Acc:1306540]	5.37	0.7	-2.94	0.0072	0.258627	yes	DOWN	N	N	Y	Y	Y	5.79	0.65
TBIG003386	XLOC_003386	-	-	0.796	0	#NAME?	0.00735	0.258627	yes	DOWN	N	N	Y	Y	Y	0.86	0
TBIG003424	XLOC_003424	-	-	1.12	0	#NAME?	0.00735	0.258627	yes	DOWN	N	N	Y	Y	Y	1.21	0
TBIG003434	XLOC_003434	-	-	1.94	0	#NAME?	0.00735	0.258627	yes	DOWN	N	N	Y	Y	Y	2.09	0
TBIG003644	XLOC_003644	-	-	2.38	0	#NAME?	0.00735	0.258627	yes	DOWN	N	N	Y	Y	Y	2.57	0
TBIG002315	XLOC_002315	-	-	0.978	0	#NAME?	0.00735	0.258627	yes	DOWN	N	N	Y	Y	Y	1.06	0
TBIG004058	XLOC_004058	-	-	3.55	0	#NAME?	0.00735	0.258627	yes	DOWN	N	N	Y	Y	Y	3.84	0
TBIG006250	XLOC_006250	-	-	1.01	0	#NAME?	0.00735	0.258627	yes	DOWN	N	N	Y	Y	Y	1.09	0
TBIG006322	XLOC_006322	-	-	2.22	0	#NAME?	0.00735	0.258627	yes	DOWN	N	N	Y	Y	Y	2.4	0
TBIG006396	XLOC_006396	-	-	1.41	0	#NAME?	0.00735	0.258627	yes	DOWN	N	N	Y	Y	Y	1.52	0
TBIG006422	XLOC_006422	-	-	1.08	0	#NAME?	0.00735	0.258627	yes	DOWN	N	N	Y	Y	Y	1.17	0
TBIG006472	XLOC_006472	-	-	1.42	0	#NAME?	0.00735	0.258627	yes	DOWN	N	N	Y	Y	Y	1.53	0
TBIG008105	XLOC_008105	-	-	9.07	0	#NAME?	0.00735	0.258627	yes	DOWN	N	N	Y	Y	Y	9.8	0
TBIG008128	XLOC_008128	-	-	0.702	0	#NAME?	0.00735	0.258627	yes	DOWN	N	N	Y	Y	Y	0.76	0
TBIG008129	XLOC_008129	-	-	1.42	0	#NAME?	0.00735	0.258627	yes	DOWN	N	N	Y	Y	Y	1.53	0
TBIG009154	XLOC_009154	-	-	0.754	0	#NAME?	0.00735	0.258627	yes	DOWN	N	N	Y	Y	Y	0.82	0
TBIG009186	XLOC_009186	-	-	1.68	0	#NAME?	0.00735	0.258627	yes	DOWN	N	N	Y	Y	Y	1.81	0
TBIG009220	XLOC_009220	-	-	0.818	0	#NAME?	0.00735	0.258627	yes	DOWN	N	N	Y	Y	Y	0.88	0
TBIG009243	XLOC_009243	-	-	0.704	0	#NAME?	0.00735	0.258627	yes	DOWN	N	N	Y	Y	Y	0.76	0
TBIG011190	XLOC_011190	-	-	2.3	0	#NAME?	0.00735	0.258627	yes	DOWN	N	N	Y	Y	Y	2.48	0
TBIG011354	XLOC_011354	-	-	0.872	0	#NAME?	0.00735	0.258627	yes	DOWN	N	N	Y	Y	Y	0.94	0
TBIG012150	XLOC_012150	-	-	0.697	0	#NAME?	0.00735	0.258627	yes	DOWN	N	N	Y	Y	Y	0.75	0
TBIG012162	XLOC_012162	-	-	1.42	0	#NAME?	0.00735	0.258627	yes	DOWN	N	N	Y	Y	Y	1.53	0
TBIG012212	XLOC_012212	-	-	1.55	0	#NAME?	0.00735	0.258627	yes	DOWN	N	N	Y	Y	Y	1.67	0
TBIG012240	XLOC_012240	-	-	1.94	0	#NAME?	0.00735	0.258627	yes	DOWN	N	N	Y	Y	Y	2.09	0
TBIG013081	XLOC_013081	-	-	1.93	0	#NAME?	0.00735	0.258627	yes	DOWN	N	N	Y	Y	Y	2.09	0
TBIG013167	XLOC_013167	-	-	1.93	0	#NAME?	0.00735	0.258627	yes	DOWN	N	N	Y	Y	Y	2.09	0
TBIG013197	XLOC_013197	-	-	0.83	0	#NAME?	0.00735	0.258627	yes	DOWN	N	N	Y	Y	Y	0.9	0
TBIG013211	XLOC_013211	-	-	1.22	0	#NAME?	0.00735	0.258627	yes	DOWN	N	N	Y	Y	Y	1.32	0
TBIG013219	XLOC_013219	-	-	1.05	0	#NAME?	0.00735	0.258627	yes	DOWN	N	N	Y	Y	Y	1.14	0
TBIG014814	XLOC_014814	-	-	0.872	0	#NAME?	0.00735	0.258627	yes	DOWN	N	N	Y	Y	Y	0.94	0
TBIG014846	XLOC_014846	-	-	0.744	0	#NAME?	0.00735	0.258627	yes	DOWN	N	N	Y	Y	Y	0.8	0
TBIG016497	XLOC_016497	-	-	1.04	0	#NAME?	0.00735	0.258627	yes	DOWN	N	N	Y	Y	Y	1.12	0
TBIG016532	XLOC_016532	-	-	0.973	0	#NAME?	0.00735	0.258627	yes	DOWN	N	N	Y	Y	Y	1.05	0
TBIG016583	XLOC_016583	-	-	0.793	0	#NAME?	0.00735	0.258627	yes	DOWN	N	N	Y	Y	Y	0.86	0
TBIG016605	XLOC_016605	-	-	2.03	0	#NAME?	0.00735	0.258627	yes	DOWN	N	N	Y	Y	Y	2.19	0
TBIG016698	XLOC_016698	KCNAB1	Voltage-gated potassium channel subunit beta-1 [Source:SWISS;Acc:Q28528]	3.9	0	#NAME?	0.00735	0.258627	yes	DOWN	N	N	Y	Y	Y	4.22	0
TBIG016739	XLOC_016739	-	-	1.31	0	#NAME?	0.00735	0.258627	yes	DOWN	N	N	Y	Y	Y	1.42	0
TBIG016915	XLOC_016915	-	-	1.15	0	#NAME?	0.00735	0.258627	yes	DOWN	N	N	Y	Y	Y	1.24	0
TBIG017809	XLOC_017809	-	-	0.6	0	#NAME?	0.00735	0.258627	yes	DOWN	N	N	Y	Y	Y	0.65	0
TBIG020140	XLOC_020140	-	-	0.929	0	#NAME?	0.00735	0.258627	yes	DOWN	N	N	Y	Y	Y	1	0
TBIG020151	XLOC_020151	-	-	0.745	0	#NAME?	0.00735	0.258627	yes	DOWN	N	N	Y	Y	Y	0.81	0
TBIG020318	XLOC_020318	-	-	0.825	0	#NAME?	0.00735	0.258627	yes	DOWN	N	N	Y	Y	Y	0.89	0
TBIG020352	XLOC_020352	-	-	10.6	0	#NAME?	0.00735	0.258627	yes	DOWN	N	N	Y	Y	Y	11.44	0
TBIG021956	XLOC_021956	-	-	0.932	0	#NAME?	0.00735	0.258627	yes	DOWN	N	N	Y	Y	Y	1.01	0
TBIG022069	XLOC_022069	Pol	Retrovirus-related Pol polyprotein LINE-1 [Source:SWISS;Acc:P11369]	0.925	0	#NAME?	0.00735	0.258627	yes	DOWN	N	N	Y	Y	Y	1	0
TBIG022239	XLOC_022239	-	-	2.76	0	#NAME?	0.00735	0.258627	yes	DOWN	N	N	Y	Y	Y	2.98	0
TBIG023745	XLOC_023745	-	-	375	0	#NAME?	0.00735	0.258627	yes	DOWN	N	N	Y	Y	Y	405.32	0
TBIG023793	XLOC_023793	-	-	1.94	0	#NAME?	0.00735	0.258627	yes	DOWN	N	N	Y	Y	Y	2.09	0
TBIG023891	XLOC_023891	-	-	0.59	0	#NAME?	0.00735	0.258627	yes	DOWN	N	N	Y	Y	Y	0.64	0
TBIG023916	XLOC_023916	-	-	3.04	0	#NAME?	0.00735	0.258627	yes	DOWN	N	N	Y	Y	Y	3.29	0
TBIG024016	XLOC_024016	-	-	1.49	0	#NAME?	0.00735	0.258627	yes	DOWN	N	N	Y	Y	Y	1.61	0
TBIG024025	XLOC_024025	-	-	0.755	0	#NAME?	0.00735	0.258627	yes	DOWN	N	N	Y	Y	Y	0.82	0
TBIG025328	XLOC_025328	-	-	1.84	0	#NAME?	0.00735	0.258627	yes	DOWN	N	N	Y	Y	Y	1.99	0
TBIG025403	XLOC_025403	-	-	0.718	0	#NAME?	0.00735	0.258627	yes	DOWN	N	N	Y	Y	Y	0.78	0
TBIG025410	XLOC_025410	-	-	1.19	0	#NAME?	0.00735	0.258627	yes	DOWN	N	N	Y	Y	Y	1.28	0
TBIG025579	XLOC_025579	-	-	1.67	0	#NAME?	0.00735	0.258627	yes	DOWN	N	N	Y	Y	Y	1.8	0
TBIG027483	XLOC_027483	-	-	0.855	0	#NAME?	0.00735	0.258627	yes	DOWN	N	N	Y	Y	Y	0.92	0
TBIG029043	XLOC_029043	-	-	1.15	0	#NAME?	0.00735	0.258627	yes	DOWN	N	N	Y	Y	Y	1.25	0
TBIG029170	XLOC_029170	-	-	0.744	0	#NAME?	0.00735	0.258627	yes	DOWN	N	N	Y	Y	Y	0.8	0
TBIG030211	XLOC_030211	-	-	17.7	0	#NAME?	0.00735	0.258627	yes	DOWN	N	N	Y	Y	Y	19.13	0
TBIG001015	ENSRNOG00000018459.L01	Xylt1	xylosyltransferase 1 [Source:RGD Symbol;Acc:620093]	4.47	1.05	-2.08	0.00745	0.261302	yes	DOWN	N	N	Y	Y	Y	4.83	0.98
TBIG014050	ENSRNOG00000013481	Cdh11	cadherin 11 [Source:RGD Symbol;Acc:619742]	11.5	2.86	-2.01	0.00745	0.261302	yes	DOWN	N	N	Y	Y	Y	12.44	2.66
TBIG009372	ENSRNOG00000002188.L01	Hpse	heparanase [Source:RGD Symbol;Acc:61969]	36.8	8.41	-2.13	0.00755	0.263536	yes	DOWN	N	N	Y	Y	Y	39.73	7.83
TBIG009984	ENSRNOG00000017775.L01	Slc5a1	solute carrier family 5 (sodium/glucose cotransporter), member 1 [Source:RGD Symbol;Acc:3713]	5.53	0.617	-3.16	0.00755	0.263536	yes	DOWN	N	N	Y	Y	Y	5.97	0.57
TBIG027995	ENSRNOG00000013932.L01	Rbp2	retinol binding protein 2, cellular [Source:RGD Symbol;Acc:3544]	33.5	4.28	-2.97	0.0077	0.267486	yes	DOWN	N	N	Y	Y	Y	36.21	3.98
TBIG010698	ENSRNOG00000024237.L01	Scel	sciellin [Source:RGD Symbol;Acc:1305102]	66.2	16.5	-2.01	0.0081	0.274807	yes	DOWN	N	N	Y	Y	Y	71.52	15.35
TBIG022643	ENSRNOG00000008161.L01	Pdzk1ip1	PDZK1 interacting protein 1 [Source:RGD Symbol;Acc:620952]	80.8	18.5	-2.13	0.00815	0.276073	yes	DOWN	N	N	Y	Y	Y	87.28	17.17
TBIG004479	ENSRNOG00000026844.L01	Lypd8	LY6/PLAUR domain containing 8 [Source:RGD Symbol;Acc:1586251]	35.1	0.647	-5.76	0.0085	0.285708	yes	DOWN	N	N	Y	Y	Y	37.86	0.6
TBIG008774	ENSRNOG00000010076.L01	Pkp1	plakophilin 1 [Source:RGD Symbol;Acc:1307472]	139	28.1	-2.31	0.00895	0.298988	yes	DOWN	N	N	Y	Y	Y	150.34	26.18
TBIG006794	ENSRNOG00000001923.L01	Tprg1	tumor protein p63 regulated 1 [Source:RGD Symbol;Acc:1306226]	11.9	0.644	-4.21	0.0093	0.307847	yes	DOWN	N	N	Y	Y	Y	12.83	0.6
TBIG004535	ENSRNOG00000002331	Aldh3a1	aldehyde dehydrogenase 3 family, member A1 [Source:RGD Symbol;Acc:2088]	224	58.7	-1.94	0.00935	0.309032	yes	DOWN	N	N	Y	Y	Y	242.62	54.56
TBIG000682	ENSRNOG00000013823.L01	Cers3	ceramide synthase 3 [Source:RGD Symbol;Acc:1564356]	6.48	0.752	-3.11	0.00945	0.310922	yes	DOWN	N	N	Y	Y	Y	7	0.7
TBIG008424	ENSRNOG00000012318.L01	Aspm	asp (abnormal spindle) homolog, microcephaly associated (Drosophila) [Source:RGD Symbol;Acc:1307111]	4.85	1.06	-2.19	0.00945	0.310922	yes	DOWN	N	N	Y	Y	Y	5.24	0.99
TBIG008753	ENSRNOG00000003120.L01	Prelp	proline/arginine-rich end leucine-rich repeat protein [Source:RGD Symbol;Acc:620226]	37.7	10.1	-1.9	0.00965	0.314651	yes	DOWN	N	N	Y	Y	Y	40.74	9.4
TBIG016461	XLOC_016461	pol	Pol polyprotein [Source:SWISS;Acc:P03356]	4.54	0.491	-3.21	0.00965	0.314651	yes	DOWN	N	N	Y	Y	Y	4.9	0.46
TBIG019393	ENSRNOG00000022710.L01	Prrg4	proline rich Gla (G-carboxyglutamic acid) 4 (transmembrane) [Source:RGD Symbol;Acc:1560542]	17.8	4.8	-1.89	0.0102	0.331591	yes	DOWN	N	N	N	Y	Y	19.28	4.48
TBIG021073	ENSRNOG00000019939.L01	Ccnd2	cyclin D2 [Source:RGD Symbol;Acc:621083]	130	26.8	-2.28	0.01065	0.344166	yes	DOWN	N	N	N	Y	Y	140.49	24.96
TBIG021837	ENSRNOG00000027592.L01	Rerg	RAS-like, estrogen-regulated, growth-inhibitor [Source:RGD Symbol;Acc:1562829]	27.6	7.28	-1.92	0.01075	0.346369	yes	DOWN	N	N	N	Y	Y	29.82	6.78
TBIG030706	ENSRNOG00000003705.L01	Bmx	BMX non-receptor tyrosine kinase [Source:RGD Symbol;Acc:1565643]	50.1	10.7	-2.23	0.01075	0.346369	yes	DOWN	N	N	N	Y	Y	54.13	9.95
TBIG023108	ENSRNOG00000009797	Aqp3	aquaporin 3 [Source:RGD Symbol;Acc:68428]	713	124	-2.53	0.01085	0.349075	yes	DOWN	N	N	N	Y	Y	770.67	114.91
TBIG023253	ENSRNOG00000049585.L01	Tnc	tenascin C [Source:RGD Symbol;Acc:621057]	9.17	1.06	-3.11	0.01125	0.360878	yes	DOWN	N	N	N	Y	Y	9.9	0.99
TBIG000154	XLOC_000154	pol	Pol polyprotein [Source:SWISS;Acc:P31792]	4.22	0.826	-2.35	0.0114	0.364081	yes	DOWN	N	N	N	Y	Y	4.56	0.77
TBIG019544	ENSRNOG00000017550.L01	Fbln7	fibulin 7 [Source:RGD Symbol;Acc:1310131]	6.25	1.24	-2.34	0.01165	0.370436	yes	DOWN	N	N	N	Y	Y	6.75	1.15
TBIG010041	ENSRNOG00000004332.L01	Egfr	epidermal growth factor receptor [Source:RGD Symbol;Acc:2543]	12.9	3.77	-1.77	0.01175	0.372528	yes	DOWN	N	N	N	Y	Y	13.89	3.51
TBIG004824	ENSRNOG00000003304	Chad	chondroadherin [Source:RGD Symbol;Acc:2336]	139	13.3	-3.39	0.0119	0.376189	yes	DOWN	N	N	N	Y	Y	149.76	12.33
TBIG000560	ENSRNOG00000022353.L01	Klk13	kallikrein related-peptidase 13 [Source:RGD Symbol;Acc:1309337]	21.2	1.58	-3.75	0.01205	0.380378	yes	DOWN	N	N	N	Y	Y	22.92	1.47
TBIG025985	XLOC_025985	-	-	5.26	1.14	-2.21	0.01235	0.38538	yes	DOWN	N	N	N	Y	Y	5.68	1.06
TBIG015929	ENSRNOG00000049075	Fabp5	fatty acid binding protein 5, epidermal [Source:RGD Symbol;Acc:70997]	267	78	-1.77	0.0124	0.386387	yes	DOWN	N	N	N	Y	Y	288.05	72.52
TBIG002321	ENSRNOG00000013028.L01	Aldh1a3	aldehyde dehydrogenase 1 family, member A3 [Source:RGD Symbol;Acc:628662]	17.7	4.77	-1.89	0.01245	0.387391	yes	DOWN	N	N	N	Y	Y	19.14	4.44
TBIG027929	ENSRNOG00000010917.L01	Bmp5	bone morphogenetic protein 5 [Source:RGD Symbol;Acc:1305979]	7.2	1.24	-2.54	0.0125	0.388392	yes	DOWN	N	N	N	Y	Y	7.78	1.16
TBIG027726	ENSRNOG00000006403.L01	Pvrl1	poliovirus receptor-related 1 [Source:RGD Symbol;Acc:620791]	38.8	10.9	-1.84	0.0127	0.393483	yes	DOWN	N	N	N	Y	Y	41.92	10.09
TBIG013728	ENSRNOG00000043219.L01	Fbn2	fibrillin 2 [Source:RGD Symbol;Acc:620910]	2.47	0.293	-3.08	0.0129	0.397981	yes	DOWN	N	N	N	Y	Y	2.67	0.27
TBIG021512	ENSRNOG00000015076.L01	Cyp26b1	cytochrome P450, family 26, subfamily b, polypeptide 1 [Source:RGD Symbol;Acc:631379]	8.38	1.57	-2.42	0.01325	0.405905	yes	DOWN	N	N	N	Y	Y	9.06	1.46
TBIG008347	ENSRNOG00000003614.L01	Mgat5	mannosyl (alpha-1,6-)-glycoprotein beta-1,6-N-acetyl-glucosaminyltransferase [Source:RGD Symbol;Acc:620100]	12	2.95	-2.02	0.01335	0.40725	yes	DOWN	N	N	N	Y	Y	12.93	2.74
TBIG012573	ENSRNOG00000017882.L01	Camk1d	calcium/calmodulin-dependent protein kinase ID [Source:RGD Symbol;Acc:1560691]	10.7	3.1	-1.78	0.01335	0.40725	yes	DOWN	N	N	N	Y	Y	11.55	2.89
TBIG009925	ENSRNOG00000038572.L01	Ncapg	non-SMC condensin I complex, subunit G [Source:RGD Symbol;Acc:1562646]	2.91	0.39	-2.9	0.0135	0.410103	yes	DOWN	N	N	N	Y	Y	3.14	0.36
TBIG024429	XLOC_024429	ARHGAP5	Rho GTPase-activating protein 5 [Source:SWISS;Acc:Q13017]	12.7	3.77	-1.76	0.0136	0.412565	yes	DOWN	N	N	N	Y	Y	13.75	3.52
TBIG014265	ENSRNOG00000012671.L01	Gan	gigaxonin [Source:RGD Symbol;Acc:1307766]	7.44	2.29	-1.7	0.01385	0.417821	yes	DOWN	N	N	N	Y	Y	8.03	2.13
TBIG002687	ENSRNOG00000016343.L01	Dkk3	dickkopf WNT signaling pathway inhibitor 3 [Source:RGD Symbol;Acc:621846]	27.3	7.48	-1.87	0.0142	0.42602	yes	DOWN	N	N	N	Y	Y	29.48	6.97
TBIG018405	ENSRNOG00000005715.L01	Lgr4	leucine-rich repeat-containing G protein-coupled receptor 4 [Source:RGD Symbol;Acc:628615]	60	16.6	-1.85	0.01435	0.429337	yes	DOWN	N	N	N	Y	Y	64.78	15.49
TBIG000698	ENSRNOG00000028992.L01	Acan	aggrecan [Source:RGD Symbol;Acc:68358]	10.4	3.14	-1.72	0.0144	0.430242	yes	DOWN	N	N	N	Y	Y	11.2	2.92
TBIG018454	ENSRNOG00000007906.L01	Bub1b	BUB1 mitotic checkpoint serine/threonine kinase B [Source:RGD Symbol;Acc:619791]	5.34	0.478	-3.48	0.0146	0.43562	yes	DOWN	N	N	N	Y	Y	5.77	0.45
TBIG027762	ENSRNOG00000018778.L01	Cadm1	cell adhesion molecule 1 [Source:RGD Symbol;Acc:1310999]	8.74	1.82	-2.26	0.0147	0.438004	yes	DOWN	N	N	N	Y	Y	9.44	1.7
TBIG015437	ENSRNOG00000043445.L01	Them5	thioesterase superfamily member 5 [Source:RGD Symbol;Acc:1562059]	100	14.7	-2.77	0.01505	0.444782	yes	DOWN	N	N	N	Y	Y	108.22	13.69
TBIG015237	ENSRNOG00000012660.L01	Postn	periostin, osteoblast specific factor [Source:RGD Symbol;Acc:1305285]	31.6	9.4	-1.75	0.0152	0.44679	yes	DOWN	N	N	N	Y	Y	34.17	8.75
TBIG023259	ENSRNOG00000005932.L01	Megf9	multiple EGF-like-domains 9 [Source:RGD Symbol;Acc:1308330]	13.1	3.88	-1.75	0.0152	0.44679	yes	DOWN	N	N	N	Y	Y	14.14	3.62
TBIG018552	ENSRNOG00000026143.L01	Ckap2l	cytoskeleton associated protein 2-like [Source:RGD Symbol;Acc:1590645]	4.89	0.77	-2.67	0.01545	0.452554	yes	DOWN	N	N	N	Y	Y	5.28	0.72
TBIG008442	ENSRNOG00000002403.L01	Fam129a	family with sequence similarity 129, member A [Source:RGD Symbol;Acc:71088]	38.9	10.7	-1.87	0.0155	0.452554	yes	DOWN	N	N	N	Y	Y	41.97	9.92
TBIG008485	ENSRNOG00000003221.L01	Myoc	myocilin, trabecular meshwork inducible glucocorticoid response [Source:RGD Symbol;Acc:620430]	107	27.1	-1.99	0.0155	0.452554	yes	DOWN	N	N	N	Y	Y	116.15	25.18
TBIG016165	ENSRNOG00000020584.L01	Efna3	ephrin A3 [Source:RGD Symbol;Acc:620390]	7.82	1.09	-2.84	0.0155	0.452554	yes	DOWN	N	N	N	Y	Y	8.45	1.02
TBIG026705	ENSRNOG00000004089.L01	Enpp2	ectonucleotide pyrophosphatase/phosphodiesterase 2 [Source:RGD Symbol;Acc:69298]	43	10.1	-2.08	0.0156	0.454256	yes	DOWN	N	N	N	Y	Y	46.39	9.44
TBIG015359	ENSRNOG00000027894.L01	Iqgap3	IQ motif containing GTPase activating protein 3 [Source:RGD Symbol;Acc:1305951]	3.34	0.661	-2.34	0.01565	0.455104	yes	DOWN	N	N	N	Y	Y	3.61	0.62
TBIG025029	ENSRNOG00000007271.L01	Map3k9	mitogen-activated protein kinase kinase kinase 9 [Source:RGD Symbol;Acc:1562149]	7.66	2.27	-1.76	0.01575	0.457401	yes	DOWN	N	N	N	Y	Y	8.28	2.11
TBIG024818	ENSRNOG00000010667.L01	Ept1	ethanolaminephosphotransferase 1 (CDP-ethanolamine-specific) [Source:RGD Symbol;Acc:1560938]	25.2	6.55	-1.94	0.01595	0.460752	yes	DOWN	N	N	N	Y	Y	27.17	6.11
TBIG026015	ENSRNOG00000026415.L01	Col14a1	collagen, type XIV, alpha 1 [Source:RGD Symbol;Acc:1305806]	21.3	6.2	-1.78	0.01595	0.460752	yes	DOWN	N	N	N	Y	Y	23.03	5.77
TBIG026977	ENSRNOG00000022282	Col2a1	collagen, type II, alpha 1 [Source:RGD Symbol;Acc:2375]	11	3.31	-1.74	0.01595	0.460752	yes	DOWN	N	N	N	Y	Y	11.95	3.07
TBIG011627	ENSRNOG00000045531	Rab11fip1	RAB11 family interacting protein 1 (class I) [Source:EntrezGene;Acc:498650]	49	13.3	-1.88	0.01615	0.465911	yes	DOWN	N	N	N	Y	Y	52.93	12.37
TBIG010925	ENSRNOG00000020136.L01	Tgm1	transglutaminase 1 [Source:RGD Symbol;Acc:61838]	41.5	13.5	-1.62	0.0165	0.4735	yes	DOWN	N	N	N	Y	Y	44.83	12.52
TBIG026778	ENSRNOG00000032231.L01	Mroh6	maestro heat-like repeat family member 6 [Source:RGD Symbol;Acc:2323632]	25.9	7.72	-1.74	0.0165	0.4735	yes	DOWN	N	N	N	Y	Y	27.97	7.18
TBIG011428	XLOC_011428	Gdf10	Bone morphogenetic protein 3B [Source:SWISS;Acc:P55108]	8.49	1.97	-2.11	0.01655	0.473687	yes	DOWN	N	N	N	Y	Y	9.18	1.84
TBIG015773	ENSRNOG00000016122	Hmgcr	3-hydroxy-3-methylglutaryl-CoA reductase [Source:RGD Symbol;Acc:2803]	27.5	8.52	-1.69	0.0167	0.476727	yes	DOWN	N	N	N	Y	Y	29.72	7.93
TBIG022368	ENSRNOG00000010106.L01	Faxc	failed axon connections homolog (Drosophila) [Source:RGD Symbol;Acc:1562449]	0.809	0	#NAME?	0.0168	0.478954	yes	DOWN	N	N	N	Y	Y	0.87	0
TBIG000040	ENSRNOG00000012286.L01	Il20ra	interleukin 20 receptor, alpha [Source:RGD Symbol;Acc:1307335]	14.2	2.93	-2.27	0.01685	0.479295	yes	DOWN	N	N	N	Y	Y	15.31	2.73
TBIG021023	ENSRNOG00000015529.L01	Cdca3	cell division cycle associated 3 [Source:RGD Symbol;Acc:1359093]	9.68	1.42	-2.77	0.0169	0.479295	yes	DOWN	N	N	N	Y	Y	10.46	1.32
TBIG024670	ENSRNOG00000012843.L01	Aspg	asparaginase [Source:RGD Symbol;Acc:708388]	7.33	0.84	-3.12	0.0169	0.479295	yes	DOWN	N	N	N	Y	Y	7.92	0.78
TBIG027249	XLOC_027249	pol	Pol polyprotein [Source:SWISS;Acc:P31623]	4.87	0.275	-4.15	0.0169	0.479295	yes	DOWN	N	N	N	Y	Y	5.27	0.26
TBIG019446	ENSRNOG00000008115.L01	Arhgap11a	Rho GTPase activating protein 11A [Source:RGD Symbol;Acc:1309107]	6.33	1.44	-2.13	0.01705	0.482921	yes	DOWN	N	N	N	Y	Y	6.83	1.35
TBIG022742	ENSRNOG00000011332.L01	Clspn	claspin [Source:RGD Symbol;Acc:1309083]	1.09	0.0938	-3.54	0.0171	0.483708	yes	DOWN	N	N	N	Y	Y	1.18	0.09
TBIG010641	ENSRNOG00000011427.L01	Hr	hair growth associated [Source:RGD Symbol;Acc:620634]	38.7	10.4	-1.9	0.01715	0.483865	yes	DOWN	N	N	N	Y	Y	41.8	9.63
TBIG024842	ENSRNOG00000005345	Vsnl1	visinin-like 1 [Source:RGD Symbol;Acc:3966]	23.3	5.39	-2.11	0.01715	0.483865	yes	DOWN	N	N	N	Y	Y	25.13	5.02
TBIG008881	ENSRNOG00000003038.L01	Sft2d2	SFT2 domain containing 2 [Source:RGD Symbol;Acc:1310623]	60.8	15.7	-1.95	0.0172	0.484178	yes	DOWN	N	N	N	Y	Y	65.73	14.66
TBIG015800	ENSRNOG00000018635.L01	Ccnb1	cyclin B1 [Source:RGD Symbol;Acc:2291]	12.6	2.16	-2.55	0.01725	0.484178	yes	DOWN	N	N	N	Y	Y	13.62	2.01
TBIG017298	ENSRNOG00000000545.L01	Col10a1	collagen, type X, alpha 1 [Source:RGD Symbol;Acc:2371]	18.4	3.16	-2.54	0.01725	0.484178	yes	DOWN	N	N	N	Y	Y	19.88	2.94
TBIG031282	ENSRNOG00000003526.L01	Sytl4	synaptotagmin-like 4 [Source:RGD Symbol;Acc:620204]	20.1	6.18	-1.7	0.01725	0.484178	yes	DOWN	N	N	N	Y	Y	21.7	5.75
TBIG003240	ENSRNOG00000015727.L01	Loxl4	lysyl oxidase-like 4 [Source:RGD Symbol;Acc:1308588]	11.9	2.94	-2.02	0.0173	0.484957	yes	DOWN	N	N	N	Y	Y	12.91	2.73
TBIG003493	XLOC_003493	Krt6a	Keratin, type II cytoskeletal 6A [Source:SWISS;Acc:Q4FZU2]	739	41.5	-4.15	0.01735	0.485733	yes	DOWN	N	N	N	Y	Y	798.69	38.63
TBIG021224	ENSRNOG00000009258.L01	Cdk6	cyclin-dependent kinase 6 [Source:RGD Symbol;Acc:621121]	9.56	3.03	-1.66	0.01745	0.48728	yes	DOWN	N	N	N	Y	Y	10.34	2.82
TBIG020612	ENSRNOG00000045771.L01	Chl1	cell adhesion molecule L1-like [Source:RGD Symbol;Acc:620122]	10.8	3.36	-1.69	0.01775	0.49439	yes	DOWN	N	N	N	Y	Y	11.66	3.13
TBIG004540	ENSRNOG00000027924.L01	Fam83g	family with sequence similarity 83, member G [Source:RGD Symbol;Acc:2322345]	8.89	2.34	-1.92	0.01785	0.49654	yes	DOWN	N	N	N	Y	Y	9.61	2.18
TBIG026160	ENSRNOG00000022268.L01	Pnpla3	patatin-like phospholipase domain containing 3 [Source:RGD Symbol;Acc:1595843]	10.6	2.7	-1.98	0.018	0.500074	yes	DOWN	N	N	N	Y	Y	11.48	2.51
TBIG002339	ENSRNOG00000011160.L01	Sv2b	synaptic vesicle glycoprotein 2b [Source:RGD Symbol;Acc:619716]	3.95	0.361	-3.45	0.0183	0.507115	yes	DOWN	N	N	N	Y	Y	4.27	0.34
TBIG000017	ENSRNOG00000025587.L01	Plagl1	pleiomorphic adenoma gene-like 1 [Source:RGD Symbol;Acc:3014]	10.6	3.04	-1.8	0.01835	0.50721	yes	DOWN	N	N	N	Y	Y	11.45	2.83
TBIG001331	ENSRNOG00000021203.L01	Atl3	atlastin GTPase 3 [Source:RGD Symbol;Acc:1309871]	33.3	9.98	-1.74	0.01835	0.50721	yes	DOWN	N	N	N	Y	Y	35.91	9.3
TBIG018451	XLOC_018451	Thbs1	Thrombospondin-1 [Source:SWISS;Acc:P35441]	18.5	1.26	-3.88	0.0184	0.507304	yes	DOWN	N	N	N	Y	Y	19.98	1.17
TBIG029860	ENSRNOG00000025654.L01	Gpr110	G protein-coupled receptor 110 [Source:RGD Symbol;Acc:1310285]	3.62	0.277	-3.71	0.0184	0.507304	yes	DOWN	N	N	N	Y	Y	3.91	0.26
TBIG011626	XLOC_011626	Rab11fip1	Rab11 family-interacting protein 1 [Source:SWISS;Acc:Q9D620]	28.6	3.44	-3.06	0.0185	0.509417	yes	DOWN	N	N	N	Y	Y	31	3.2
TBIG018475	ENSRNOG00000004921.L01	Nusap1	nucleolar and spindle associated protein 1 [Source:RGD Symbol;Acc:1305764]	7.06	1.18	-2.58	0.01865	0.512899	yes	DOWN	N	N	N	Y	Y	7.62	1.1
TBIG010568	ENSRNOG00000051196.L01	Parp4	poly (ADP-ribose) polymerase family, member 4 [Source:RGD Symbol;Acc:1310524]	15.8	4.81	-1.72	0.01875	0.514426	yes	DOWN	N	N	N	Y	Y	17.11	4.48
TBIG009403	ENSRNOG00000002273	Naaa	N-acylethanolamine acid amidase [Source:RGD Symbol;Acc:1307267]	34.2	10.2	-1.75	0.0188	0.514426	yes	DOWN	N	N	N	Y	Y	36.95	9.49
TBIG021449	ENSRNOG00000007740.L01	Tacstd2	tumor-associated calcium signal transducer 2 [Source:RGD Symbol;Acc:1359498]	186	56.1	-1.73	0.0189	0.516513	yes	DOWN	N	N	N	Y	Y	200.85	52.2
TBIG028885	XLOC_028885	-	-	1.96	0.331	-2.57	0.0192	0.523398	yes	DOWN	N	N	N	Y	Y	2.12	0.31
TBIG005065	ENSRNOG00000047367.L01	Card14	caspase recruitment domain family, member 14 [Source:RGD Symbol;Acc:1591135]	20	3.55	-2.49	0.01955	0.530946	yes	DOWN	N	N	N	Y	Y	21.59	3.3
TBIG018457	ENSRNOG00000009334	Knstrn	kinetochore-localized astrin/SPAG5 binding protein [Source:RGD Symbol;Acc:1303240]	7.86	0.493	-3.99	0.0196	0.53098	yes	DOWN	N	N	N	Y	Y	8.49	0.46
TBIG024384	ENSRNOG00000023272	Rrm2	ribonucleotide reductase M2 [Source:RGD Symbol;Acc:1598310]	11.5	0.741	-3.96	0.0196	0.53098	yes	DOWN	N	N	N	Y	Y	12.45	0.69
TBIG007526	ENSRNOG00000001469	Eln	elastin [Source:RGD Symbol;Acc:67394]	123	33.6	-1.87	0.0197	0.533026	yes	DOWN	N	N	N	Y	Y	132.85	31.23
TBIG014916	ENSRNOG00000012183.L01	Glrx	glutaredoxin (thioltransferase) [Source:RGD Symbol;Acc:70951]	239	76.8	-1.64	0.02	0.538467	yes	DOWN	N	N	N	Y	Y	257.8	71.51
TBIG022375	ENSRNOG00000007030.L01	Epha7	Eph receptor A7 [Source:RGD Symbol;Acc:70957]	9.12	2.81	-1.7	0.02	0.538467	yes	DOWN	N	N	N	Y	Y	9.85	2.62
TBIG005828	ENSRNOG00000014070.L01	Krt13	keratin 13 [Source:RGD Symbol;Acc:1302937]	894	119	-2.91	0.0201	0.539825	yes	DOWN	N	N	N	Y	Y	965.93	110.71
TBIG009849	ENSRNOG00000002227.L01	Kit	v-kit Hardy-Zuckerman 4 feline sarcoma viral oncogene homolog [Source:RGD Symbol;Acc:620568]	16.7	5.47	-1.61	0.0201	0.539825	yes	DOWN	N	N	N	Y	Y	18	5.09
TBIG026703	ENSRNOG00000008336	Tnfrsf11b	tumor necrosis factor receptor superfamily, member 11b [Source:RGD Symbol;Acc:619802]	14.3	4.05	-1.82	0.0202	0.541176	yes	DOWN	N	N	N	Y	Y	15.48	3.77
TBIG011073	ENSRNOG00000012821.L01	Lect1	leukocyte cell derived chemotaxin 1 [Source:RGD Symbol;Acc:620176]	21.2	5.54	-1.93	0.02025	0.541184	yes	DOWN	N	N	N	Y	Y	22.88	5.15
TBIG001744	ENSRNOG00000028261.L01	Tppp	tubulin polymerization promoting protein [Source:RGD Symbol;Acc:1310121]	30.9	10.2	-1.6	0.02045	0.54386	yes	DOWN	N	N	N	Y	Y	33.35	9.45
TBIG001509	ENSRNOG00000016377.L01	Cep55	centrosomal protein 55 [Source:RGD Symbol;Acc:1305340]	3.63	0.572	-2.67	0.02045	0.54386	yes	DOWN	N	N	N	Y	Y	3.92	0.53
TBIG015523	ENSRNOG00000018716.L01	Dennd2c	DENN/MADD domain containing 2C [Source:RGD Symbol;Acc:1308197]	12.8	4.23	-1.59	0.0205	0.544525	yes	DOWN	N	N	N	Y	Y	13.78	3.94
TBIG023197	ENSRNOG00000018126.L01	Abca1	ATP-binding cassette, subfamily A (ABC1), member 1 [Source:RGD Symbol;Acc:631344]	5.5	1.54	-1.84	0.02065	0.547841	yes	DOWN	N	N	N	Y	Y	5.94	1.43
TBIG013533	ENSRNOG00000014104.L01	Myo5b	myosin Vb [Source:RGD Symbol;Acc:621347]	9.09	2.79	-1.7	0.0207	0.5485	yes	DOWN	N	N	N	Y	Y	9.82	2.6
TBIG021637	ENSRNOG00000007909	Cd69	Cd69 molecule [Source:RGD Symbol;Acc:61318]	11.1	2.41	-2.2	0.02075	0.549156	yes	DOWN	N	N	N	Y	Y	11.98	2.25
TBIG001493	ENSRNOG00000018929.L01	Kif20b	kinesin family member 20B [Source:RGD Symbol;Acc:1308497]	2.33	0.372	-2.65	0.0208	0.549812	yes	DOWN	N	N	N	Y	Y	2.51	0.35
TBIG029537	ENSRNOG00000031232.L01	Nrp2	neuropilin 2 [Source:RGD Symbol;Acc:621442]	7.15	2.21	-1.7	0.02115	0.554972	yes	DOWN	N	N	N	Y	Y	7.73	2.05
TBIG031421	ENSRNOG00000002487.L01	Mbnl3	muscleblind-like splicing regulator 3 [Source:RGD Symbol;Acc:1565834]	9.56	2.96	-1.69	0.0212	0.554972	yes	DOWN	N	N	N	Y	Y	10.32	2.76
TBIG001828	ENSRNOG00000010529.L01	Thbs2	thrombospondin 2 [Source:RGD Symbol;Acc:1310979]	2.37	0.375	-2.66	0.02125	0.554972	yes	DOWN	N	N	N	Y	Y	2.56	0.35
TBIG009438	ENSRNOG00000022255.L01	Tmprss11e	transmembrane protease, serine 11e [Source:RGD Symbol;Acc:1561698]	2.62	0.257	-3.35	0.02125	0.554972	yes	DOWN	N	N	N	Y	Y	2.83	0.24
TBIG022708	ENSRNOG00000014259.L01	Mycl	v-myc avian myelocytomatosis viral oncogene lung carcinoma derived homolog [Source:RGD Symbol;Acc:1588591]	15.1	4	-1.91	0.02125	0.554972	yes	DOWN	N	N	N	Y	Y	16.3	3.72
TBIG010604	ENSRNOG00000015921	Esco2	establishment of sister chromatid cohesion N-acetyltransferase 2 [Source:RGD Symbol;Acc:1593313]	2.83	0.449	-2.66	0.02155	0.56146	yes	DOWN	N	N	N	Y	Y	3.05	0.42
TBIG010722	ENSRNOG00000023687.L01	Rap2a	RAS related protein 2a [Source:RGD Symbol;Acc:620590]	13.2	2.25	-2.55	0.02165	0.562719	yes	DOWN	N	N	N	Y	Y	14.28	2.09
TBIG016331	ENSRNOG00000020058.L01	Celsr2	cadherin, EGF LAG seven-pass G-type receptor 2 [Source:RGD Symbol;Acc:69237]	9.42	3.19	-1.56	0.0217	0.563257	yes	DOWN	N	N	N	Y	Y	10.19	2.97
TBIG027789	ENSRNOG00000025115.L01	Exph5	exophilin 5 [Source:RGD Symbol;Acc:1560308]	10.8	3.61	-1.57	0.02175	0.563257	yes	DOWN	N	N	N	Y	Y	11.63	3.37
TBIG000810	ENSRNOG00000012494.L01	Kctd14	potassium channel tetramerization domain containing 14 [Source:RGD Symbol;Acc:1306430]	40.8	13	-1.65	0.0218	0.563257	yes	DOWN	N	N	N	Y	Y	44.09	12.12
TBIG011078	ENSRNOG00000008986.L01	Diaph3	diaphanous-related formin 3 [Source:RGD Symbol;Acc:1593287]	3.67	0.671	-2.45	0.0218	0.563257	yes	DOWN	N	N	N	Y	Y	3.96	0.62
TBIG017617	ENSRNOG00000000572.L01	Chst3	carbohydrate (chondroitin 6) sulfotransferase 3 [Source:RGD Symbol;Acc:620355]	4.49	1.11	-2.02	0.0218	0.563257	yes	DOWN	N	N	N	Y	Y	4.86	1.03
TBIG029262	ENSRNOG00000022499.L01	Sgol1	shugoshin-like 1 (S. pombe) [Source:RGD Symbol;Acc:1593238]	1.48	0.134	-3.46	0.0219	0.564502	yes	DOWN	N	N	N	Y	Y	1.6	0.13
TBIG000565	ENSRNOG00000018580.L01	Klk8	kallikrein related-peptidase 8 [Source:RGD Symbol;Acc:1305998]	3.35	0.345	-3.28	0.02225	0.57009	yes	DOWN	N	N	N	Y	Y	3.62	0.32
TBIG027952	ENSRNOG00000009613.L01	Sh3bgrl2	SH3 domain binding glutamate-rich protein like 2 [Source:RGD Symbol;Acc:1591931]	42.6	13.8	-1.62	0.02225	0.57009	yes	DOWN	N	N	N	Y	Y	46.02	12.88
TBIG015596	ENSRNOG00000016351.L01	Frrs1	ferric-chelate reductase 1 [Source:RGD Symbol;Acc:1306883]	13.5	3.49	-1.95	0.0223	0.57009	yes	DOWN	N	N	N	Y	Y	14.56	3.25
TBIG026987	XLOC_026987	-	-	2.27	0.34	-2.74	0.0224	0.571975	yes	DOWN	N	N	N	Y	Y	2.45	0.32
TBIG018436	ENSRNOG00000005814.L01	Katnbl1	katanin p80 subunit B-like 1 [Source:RGD Symbol;Acc:1582771]	8.67	1.32	-2.72	0.02245	0.57258	yes	DOWN	N	N	N	Y	Y	9.36	1.23
TBIG030695	ENSRNOG00000004275.L01	Egfl6	EGF-like-domain, multiple 6 [Source:RGD Symbol;Acc:1563321]	39.9	12.7	-1.65	0.02275	0.579553	yes	DOWN	N	N	N	Y	Y	43.09	11.82
TBIG004001	XLOC_004001	-	-	1.62	0.267	-2.6	0.02285	0.580065	yes	DOWN	N	N	N	Y	Y	1.75	0.25
TBIG015513	ENSRNOG00000023851.L01	Igsf3	immunoglobulin superfamily, member 3 [Source:RGD Symbol;Acc:1307796]	5.72	1.49	-1.94	0.02285	0.580065	yes	DOWN	N	N	N	Y	Y	6.18	1.38
TBIG013677	ENSRNOG00000019462.L01	Pcdh1	protocadherin 1 [Source:RGD Symbol;Acc:1308490]	45.7	14.7	-1.63	0.023	0.583193	yes	DOWN	N	N	N	Y	Y	49.48	13.7
TBIG007112	XLOC_007112	Tceb2	Transcription elongation factor B polypeptide 2 [Source:SWISS;Acc:P62870]	9.25	1.77	-2.38	0.0232	0.58758	yes	DOWN	N	N	N	Y	Y	9.99	1.65
TBIG013716	ENSRNOG00000014426.L01	Lox	lysyl oxidase [Source:RGD Symbol;Acc:3015]	7.15	2.1	-1.76	0.02355	0.593683	yes	DOWN	N	N	N	Y	Y	7.72	1.96
TBIG031357	ENSRNOG00000018187	LOC100909901	rac GTPase-activating protein 1-like [Source:RGD Symbol;Acc:6501444]	4.25	0.369	-3.53	0.02355	0.593683	yes	DOWN	N	N	N	Y	Y	4.59	0.34
TBIG009423	ENSRNOG00000001960.L01	Sult1d1	sulfotransferase family 1D, member 1 [Source:RGD Symbol;Acc:620491]	14.2	3.44	-2.05	0.02365	0.595515	yes	DOWN	N	N	N	Y	Y	15.35	3.21
TBIG012904	ENSRNOG00000017163	Pfkp	phosphofructokinase, platelet [Source:RGD Symbol;Acc:61893]	15.9	4.61	-1.79	0.02375	0.595966	yes	DOWN	N	N	N	Y	Y	17.21	4.29
TBIG001664	ENSRNOG00000023549.L01	Samd5	sterile alpha motif domain containing 5 [Source:RGD Symbol;Acc:1311012]	6.96	1.74	-2	0.0241	0.601975	yes	DOWN	N	N	N	Y	Y	7.52	1.62
TBIG009829	ENSRNOG00000002002.L01	Tmprss11bnl	transmembrane protease, serine 11B N terminal like [Source:RGD Symbol;Acc:1303278]	65.2	18	-1.86	0.02425	0.60351	yes	DOWN	N	N	N	Y	Y	70.42	16.75
TBIG021536	ENSRNOG00000008678.L01	Antxr1	anthrax toxin receptor 1 [Source:RGD Symbol;Acc:1307144]	38.4	11.9	-1.69	0.0245	0.607093	yes	DOWN	N	N	N	Y	Y	41.48	11.06
TBIG009952	ENSRNOG00000007599.L01	Afap1	actin filament associated protein 1 [Source:RGD Symbol;Acc:619959]	11.6	2.57	-2.18	0.0246	0.608878	yes	DOWN	N	N	N	Y	Y	12.58	2.39
TBIG026522	ENSRNOG00000025198.L01	Gas2l3	growth arrest-specific 2 like 3 [Source:RGD Symbol;Acc:1594151]	3.38	0.711	-2.25	0.0247	0.609525	yes	DOWN	N	N	N	Y	Y	3.66	0.66
TBIG014137	ENSRNOG00000008450	LOC100359539	ribonucleotide reductase M2 polypeptide [Source:RGD Symbol;Acc:2323655]	7.61	1.25	-2.61	0.02475	0.609525	yes	DOWN	N	N	N	Y	Y	8.22	1.16
TBIG018543	ENSRNOG00000015445.L01	Mal	mal, T-cell differentiation protein [Source:RGD Symbol;Acc:3037]	177	53.4	-1.73	0.0248	0.609525	yes	DOWN	N	N	N	Y	Y	191.2	49.75
TBIG008328	ENSRNOG00000002396.L01	Serpinb8	serpin peptidase inhibitor, clade B (ovalbumin), member 8 [Source:RGD Symbol;Acc:1309833]	32.3	10.9	-1.56	0.02485	0.609525	yes	DOWN	N	N	N	Y	Y	34.84	10.18
TBIG024627	ENSRNOG00000010527	Serpina3n	serine (or cysteine) peptidase inhibitor, clade A, member 3N [Source:RGD Symbol;Acc:3747]	5.04	1.15	-2.14	0.02485	0.609525	yes	DOWN	N	N	N	Y	Y	5.45	1.07
TBIG015958	ENSRNOG00000024365.L01	Ect2	epithelial cell transforming 2 [Source:RGD Symbol;Acc:1308524]	6.09	0.589	-3.37	0.0251	0.613584	yes	DOWN	N	N	N	Y	Y	6.58	0.55
TBIG028470	ENSRNOG00000011381	Acsbg1	acyl-CoA synthetase bubblegum family member 1 [Source:RGD Symbol;Acc:708557]	11.4	2.47	-2.21	0.0254	0.619527	yes	DOWN	N	N	N	Y	Y	12.31	2.29
TBIG017910	ENSRNOG00000005871.L01	Il1rn	interleukin 1 receptor antagonist [Source:RGD Symbol;Acc:621159]	21.4	5.66	-1.91	0.02575	0.625961	yes	DOWN	N	N	N	Y	Y	23.06	5.28
TBIG015427	ENSRNOG00000009314.L01	Ivl	involucrin [Source:RGD Symbol;Acc:620141]	1.9	0.171	-3.48	0.0258	0.626477	yes	DOWN	N	N	N	Y	Y	2.05	0.16
TBIG009506	ENSRNOG00000002209.L01	Arap2	ArfGAP with RhoGAP domain, ankyrin repeat and PH domain 2 [Source:RGD Symbol;Acc:1306452]	13.6	4.6	-1.56	0.0259	0.627506	yes	DOWN	N	N	N	Y	Y	14.63	4.29
TBIG005963	ENSRNOG00000024711.L01	Sdk2	sidekick cell adhesion molecule 2 [Source:RGD Symbol;Acc:1310397]	1.09	0.117	-3.21	0.02595	0.628019	yes	DOWN	N	N	N	Y	Y	1.18	0.11
TBIG000996	ENSRNOG00000014448.L01	Arntl	aryl hydrocarbon receptor nuclear translocator-like [Source:RGD Symbol;Acc:62003]	25.1	8.81	-1.51	0.02605	0.629041	yes	DOWN	N	N	N	Y	Y	27.08	8.2
TBIG030180	ENSRNOG00000013727.L01	Ndc80	NDC80 kinetochore complex component [Source:RGD Symbol;Acc:1310154]	4.14	0.694	-2.58	0.02605	0.629041	yes	DOWN	N	N	N	Y	Y	4.47	0.65
TBIG005316	ENSRNOG00000032396.L02	RGD1559575	similar to novel protein [Source:RGD Symbol;Acc:1559575]	16.5	5.63	-1.55	0.02615	0.630566	yes	DOWN	N	N	N	Y	Y	17.77	5.24
TBIG009964	ENSRNOG00000008645.L01	Igfbp3	insulin-like growth factor binding protein 3 [Source:RGD Symbol;Acc:2874]	199	55.9	-1.83	0.0262	0.630566	yes	DOWN	N	N	N	Y	Y	215.4	52.03
TBIG004889	ENSRNOG00000027871.L01	RAPGEFL1	Uncharacterized protein [Source:UniProtKB/TrEMBL;Acc:F1LPE3]	38.1	10.6	-1.84	0.0263	0.631577	yes	DOWN	N	N	N	Y	Y	41.22	9.89
TBIG011663	ENSRNOG00000024650	Ckap2	cytoskeleton associated protein 2 [Source:RGD Symbol;Acc:1311631]	6.24	1.46	-2.09	0.02645	0.633085	yes	DOWN	N	N	N	Y	Y	6.74	1.36
TBIG017225	ENSRNOG00000000632.L01	Cdk1	cyclin-dependent kinase 1 [Source:RGD Symbol;Acc:2319]	15.1	2.75	-2.46	0.02645	0.633085	yes	DOWN	N	N	N	Y	Y	16.31	2.56
TBIG012544	ENSRNOG00000018113	Anlnl1	anillin, actin binding protein-like 1 [Source:RGD Symbol;Acc:1566097]	3.98	0.332	-3.58	0.02655	0.633391	yes	DOWN	N	N	N	Y	Y	4.3	0.31
TBIG017421	ENSRNOG00000050215	LOC682408	similar to corneodesmosin [Source:RGD Symbol;Acc:1583483]	23.6	5.32	-2.15	0.02685	0.638245	yes	DOWN	N	N	N	Y	Y	25.46	4.95
TBIG018441	ENSRNOG00000031760.L01	AABR06025587.1	Protein Fmn1 [Source:UniProtKB/TrEMBL;Acc:D3ZBI5]	2.79	0.544	-2.36	0.0269	0.638245	yes	DOWN	N	N	N	Y	Y	3.01	0.51
TBIG021680	ENSRNOG00000014578.L01	Fxyd4	FXYD domain-containing ion transport regulator 4 [Source:RGD Symbol;Acc:70998]	83.7	23.2	-1.85	0.0269	0.638245	yes	DOWN	N	N	N	Y	Y	90.44	21.62
TBIG025861	ENSRNOG00000006367.L01	Slc5a8	solute carrier family 5 (sodium/monocarboxylate cotransporter), member 8 [Source:RGD Symbol;Acc:1564146]	4.79	1.25	-1.94	0.0271	0.641593	yes	DOWN	N	N	N	Y	Y	5.18	1.16
TBIG023271	ENSRNOG00000010484.L01	Zdhhc21	zinc finger, DHHC-type containing 21 [Source:RGD Symbol;Acc:1305750]	7.26	1.26	-2.52	0.0272	0.641991	yes	DOWN	N	N	N	Y	Y	7.84	1.18
TBIG015279	ENSRNOG00000011238.L01	Tiparp	TCDD-inducible poly(ADP-ribose) polymerase [Source:RGD Symbol;Acc:1306171]	18.5	6.06	-1.61	0.02725	0.641991	yes	DOWN	N	N	N	Y	Y	19.99	5.65
TBIG018152	ENSRNOG00000005743	Dapl1	death associated protein-like 1 [Source:RGD Symbol;Acc:1309610]	265	96.8	-1.45	0.02725	0.641991	yes	DOWN	N	N	N	Y	Y	285.99	90.04
TBIG020998	ENSRNOG00000005599.L01	Cpamd8	C3 and PZP-like, alpha-2-macroglobulin domain containing 8 [Source:EntrezGene;Acc:297572]	3.18	0.431	-2.88	0.0273	0.641991	yes	DOWN	N	N	N	Y	Y	3.43	0.4
TBIG008324	ENSRNOG00000002583.L01	Serpinb11	serpin peptidase inhibitor, clade B (ovalbumin), member 11 [Source:RGD Symbol;Acc:1306497]	14.6	3.42	-2.1	0.0274	0.641991	yes	DOWN	N	N	N	Y	Y	15.77	3.18
TBIG019528	ENSRNOG00000012051.L01	Ncaph	non-SMC condensin I complex, subunit H [Source:RGD Symbol;Acc:1596799]	5.2	0.456	-3.51	0.0274	0.641991	yes	DOWN	N	N	N	Y	Y	5.61	0.42
TBIG000562	ENSRNOG00000018742.L01	Klk11	kallikrein related-peptidase 11 [Source:RGD Symbol;Acc:1308690]	14.2	0.561	-4.66	0.02745	0.641991	yes	DOWN	N	N	N	Y	Y	15.37	0.52
TBIG028081	XLOC_028081	Col7a1	Collagen alpha-1(VII) chain [Source:SWISS;Acc:Q63870]	27.2	7.96	-1.77	0.02745	0.641991	yes	DOWN	N	N	N	Y	Y	29.43	7.4
TBIG001688	ENSRNOG00000011409	Hebp2	heme binding protein 2 [Source:RGD Symbol;Acc:1311553]	33.9	10.3	-1.72	0.0275	0.641991	yes	DOWN	N	N	N	Y	Y	36.68	9.57
TBIG024706	ENSRNOG00000004968.L01	Ncapg2	non-SMC condensin II complex, subunit G2 [Source:RGD Symbol;Acc:1308406]	3.84	1.01	-1.93	0.0275	0.641991	yes	DOWN	N	N	N	Y	Y	4.14	0.94
TBIG006776	ENSRNOG00000001724.L01	Atp13a3	ATPase type 13A3 [Source:RGD Symbol;Acc:1590881]	7.9	1.26	-2.65	0.02755	0.64247	yes	DOWN	N	N	N	Y	Y	8.53	1.17
TBIG005890	ENSRNOG00000021713.L01	Kif18b	kinesin family member 18B [Source:RGD Symbol;Acc:1310360]	4.05	0.735	-2.46	0.0277	0.64395	yes	DOWN	N	N	N	Y	Y	4.38	0.68
TBIG030778	ENSRNOG00000005639.L01	Ar	androgen receptor [Source:RGD Symbol;Acc:2147]	5.05	1.73	-1.55	0.02775	0.64395	yes	DOWN	N	N	N	Y	Y	5.45	1.61
TBIG010960	ENSRNOG00000022116.L01	Gjb6	gap junction protein, beta 6 [Source:RGD Symbol;Acc:621830]	6.41	0.458	-3.81	0.0278	0.64395	yes	DOWN	N	N	N	Y	Y	6.92	0.43
TBIG024712	ENSRNOG00000037436.L01	Macc1	metastasis associated in colon cancer 1 [Source:RGD Symbol;Acc:1309838]	4.4	1.04	-2.08	0.0278	0.64395	yes	DOWN	N	N	N	Y	Y	4.75	0.97
TBIG016046	ENSRNOG00000013894.L01	Gpr87	G protein-coupled receptor 87 [Source:RGD Symbol;Acc:1307852]	20.8	5.64	-1.88	0.02785	0.64395	yes	DOWN	N	N	N	Y	Y	22.45	5.25
TBIG016144	ENSRNOG00000019412.L01	Rhbg	Rh family, B glycoprotein [Source:RGD Symbol;Acc:727813]	16.8	3.34	-2.33	0.02785	0.64395	yes	DOWN	N	N	N	Y	Y	18.16	3.11
TBIG002391	ENSRNOG00000012442.L01	Cemip	cell migration inducing protein, hyaluronan binding [Source:RGD Symbol;Acc:1305254]	2.01	0.105	-4.26	0.0281	0.648134	yes	DOWN	N	N	N	Y	Y	2.17	0.1
TBIG007416	ENSRNOG00000001031.L01	Ocm2	oncomodulin 2 [Source:RGD Symbol;Acc:3222]	54.7	14.7	-1.9	0.02815	0.648134	yes	DOWN	N	N	N	Y	Y	59.08	13.66
TBIG017690	ENSRNOG00000025998.L01	Aim1	absent in melanoma 1 [Source:RGD Symbol;Acc:1308629]	14.3	5.18	-1.46	0.02815	0.648134	yes	DOWN	N	N	N	Y	Y	15.46	4.82
TBIG016335	ENSRNOG00000012149.L01	Gpsm2	G-protein signaling modulator 2 [Source:RGD Symbol;Acc:1560967]	11	2.92	-1.92	0.0282	0.6486	yes	DOWN	N	N	N	Y	Y	11.91	2.72
TBIG028273	ENSRNOG00000020901.L01	S1pr5	sphingosine-1-phosphate receptor 5 [Source:RGD Symbol;Acc:620566]	31.8	9.35	-1.77	0.02835	0.650676	yes	DOWN	N	N	N	Y	Y	34.41	8.7
TBIG026047	ENSRNOG00000005887.L01	Psca	prostate stem cell antigen [Source:RGD Symbol;Acc:1594221]	133	33.7	-1.98	0.02855	0.653888	yes	DOWN	N	N	N	Y	Y	143.33	31.38
TBIG002219	ENSRNOG00000019138.L01	Clec11a	C-type lectin domain family 11, member A [Source:RGD Symbol;Acc:3627]	4.21	0.74	-2.51	0.0287	0.656633	yes	DOWN	N	N	N	Y	Y	4.55	0.69
TBIG008684	ENSRNOG00000002578.L01	Serpinb3a	serine (or cysteine) peptidase inhibitor, clade B (ovalbumin), member 3A [Source:RGD Symbol;Acc:1562868]	6	0.42	-3.84	0.0288	0.65823	yes	DOWN	N	N	N	Y	Y	6.48	0.39
TBIG008727	XLOC_008727	-	-	5.41	0.664	-3.03	0.02895	0.659582	yes	DOWN	N	N	N	Y	Y	5.85	0.62
TBIG016407	ENSRNOG00000010575.L01	Dapp1	dual adaptor of phosphotyrosine and 3-phosphoinositides [Source:RGD Symbol;Acc:1310189]	8.18	2.25	-1.86	0.02895	0.659582	yes	DOWN	N	N	N	Y	Y	8.84	2.09
TBIG021199	ENSRNOG00000006631.L01	Sema3e	sema domain, immunoglobulin domain (Ig), short basic domain, secreted, (semaphorin) 3E [Source:RGD Symbol;Acc:1310973]	3.61	0.939	-1.94	0.02905	0.659789	yes	DOWN	N	N	N	Y	Y	3.9	0.88
TBIG028464	ENSRNOG00000024230.L01	Tnfaip8l3	tumor necrosis factor, alpha-induced protein 8-like 3 [Source:RGD Symbol;Acc:1311533]	5.79	1.05	-2.46	0.02905	0.659789	yes	DOWN	N	N	N	Y	Y	6.25	0.98
TBIG027954	ENSRNOG00000029055.L01	Ttk	Ttk protein kinase [Source:RGD Symbol;Acc:1305558]	2.57	0.292	-3.14	0.02905	0.659789	yes	DOWN	N	N	N	Y	Y	2.77	0.27
TBIG022990	ENSRNOG00000017686.L01	Pi15	peptidase inhibitor 15 [Source:RGD Symbol;Acc:1309577]	3.97	0.833	-2.25	0.0293	0.663392	yes	DOWN	N	N	N	Y	Y	4.29	0.78
TBIG003194	ENSRNOG00000021916.L01	Slc16a12	solute carrier family 16, member 12 [Source:RGD Symbol;Acc:1311468]	29.4	10.3	-1.52	0.02955	0.668358	yes	DOWN	N	N	N	Y	Y	31.8	9.59
TBIG019456	ENSRNOG00000005404.L01	Rasgrp1	RAS guanyl releasing protein 1 (calcium and DAG-regulated) [Source:RGD Symbol;Acc:3539]	11.6	3.82	-1.6	0.0297	0.670358	yes	DOWN	N	N	N	Y	Y	12.51	3.56
TBIG031321	ENSRNOG00000018856.L01	Col4a6	collagen, type IV, alpha 6 [Source:RGD Symbol;Acc:1589724]	2.15	0.557	-1.95	0.0297	0.670358	yes	DOWN	N	N	N	Y	Y	2.32	0.52
TBIG010065	ENSRNOG00000006205.L01	Rel	v-rel avian reticuloendotheliosis viral oncogene homolog [Source:RGD Symbol;Acc:1311231]	5.64	1.32	-2.09	0.0299	0.673477	yes	DOWN	N	N	N	Y	Y	6.09	1.23
TBIG016291	ENSRNOG00000014479.L01	Cttnbp2nl	CTTNBP2 N-terminal like [Source:RGD Symbol;Acc:1310822]	20.2	7.33	-1.46	0.03015	0.67631	yes	DOWN	N	N	N	Y	Y	21.76	6.83
TBIG020475	ENSRNOG00000007234	Cyp51	cytochrome P450, family 51 [Source:RGD Symbol;Acc:2481]	26.9	9.41	-1.52	0.03015	0.67631	yes	DOWN	N	N	N	Y	Y	29.07	8.76
TBIG023416	ENSRNOG00000028415	Cdc20	cell division cycle 20 [Source:RGD Symbol;Acc:620477]	9.97	2.42	-2.04	0.0302	0.676735	yes	DOWN	N	N	N	Y	Y	10.78	2.25
TBIG014397	ENSRNOG00000016695.L01	Mmp2	matrix metallopeptidase 2 [Source:RGD Symbol;Acc:621316]	81.9	28	-1.55	0.03045	0.680237	yes	DOWN	N	N	N	Y	Y	88.48	26.07
TBIG007125	ENSRNOG00000001925.L01	Leprel1	leprecan-like 1 [Source:RGD Symbol;Acc:1304568]	25.9	8.95	-1.54	0.0306	0.681491	yes	DOWN	N	N	N	Y	Y	28.03	8.32
TBIG019472	ENSRNOG00000013380	Rhov	ras homolog family member V [Source:RGD Symbol;Acc:628824]	52.9	18.6	-1.51	0.0312	0.692428	yes	DOWN	N	N	N	Y	Y	57.16	17.32
TBIG029748	ENSRNOG00000037227.L01	Yes1	Yamaguchi sarcoma viral (v-yes) oncogene homolog 1 [Source:RGD Symbol;Acc:3977]	20.1	6.3	-1.67	0.03125	0.692428	yes	DOWN	N	N	N	Y	Y	21.71	5.87
TBIG015161	ENSRNOG00000028156.L01	Pld1	phospholipase D1 [Source:RGD Symbol;Acc:3349]	12.3	4.17	-1.56	0.0313	0.69253	yes	DOWN	N	N	N	Y	Y	13.27	3.88
TBIG027967	ENSRNOG00000011071.L01	Nt5e	5' nucleotidase, ecto [Source:RGD Symbol;Acc:61956]	23	8.21	-1.49	0.03145	0.693332	yes	DOWN	N	N	N	Y	Y	24.87	7.65
TBIG028531	ENSRNOG00000014164.L01	Paqr5	progestin and adipoQ receptor family member V [Source:RGD Symbol;Acc:1311259]	41.3	14	-1.56	0.03165	0.697036	yes	DOWN	N	N	N	Y	Y	44.59	13.01
TBIG011327	XLOC_011327	-	-	0.846	0.0842	-3.33	0.0317	0.697432	yes	DOWN	N	N	N	Y	Y	0.91	0.08
TBIG012930	ENSRNOG00000017987	Ucma	upper zone of growth plate and cartilage matrix associated [Source:RGD Symbol;Acc:1308977]	26.3	6.58	-2	0.0319	0.698305	yes	DOWN	N	N	N	Y	Y	28.42	6.12
TBIG016116	ENSRNOG00000024594.L01	Fhdc1	FH2 domain containing 1 [Source:RGD Symbol;Acc:1311955]	27.2	9.74	-1.48	0.0322	0.703459	yes	DOWN	N	N	N	Y	Y	29.4	9.06
TBIG013348	ENSRNOG00000018525.L01	Slc4a9	solute carrier family 4, sodium bicarbonate cotransporter, member 9 [Source:RGD Symbol;Acc:628811]	4.05	0.567	-2.84	0.03225	0.703845	yes	DOWN	N	N	N	Y	Y	4.38	0.53
TBIG019689	ENSRNOG00000046772.L01	Fam83c	family with sequence similarity 83, member C [Source:RGD Symbol;Acc:1585687]	4.93	1.19	-2.05	0.0324	0.706411	yes	DOWN	N	N	N	Y	Y	5.33	1.11
TBIG023006	ENSRNOG00000049052.L01	Sgk3	serum/glucocorticoid regulated kinase family, member 3 [Source:RGD Symbol;Acc:620242]	14.4	4.66	-1.63	0.03245	0.706793	yes	DOWN	N	N	N	Y	Y	15.59	4.35
TBIG017117	ENSRNOG00000000479	Kifc1	kinesin family member C1 [Source:RGD Symbol;Acc:1359118]	9.01	2.26	-1.99	0.0326	0.707937	yes	DOWN	N	N	N	Y	Y	9.74	2.1
TBIG012617	ENSRNOG00000002624.L01	Edaradd	EDAR-associated death domain [Source:RGD Symbol;Acc:1564010]	18	4.86	-1.89	0.0327	0.708695	yes	DOWN	N	N	N	Y	Y	19.44	4.52
TBIG008382	ENSRNOG00000048096.L01	Plekha6	pleckstrin homology domain containing, family A member 6 [Source:MGI Symbol;Acc:MGI:2388662]	21.2	6.49	-1.71	0.0328	0.708747	yes	DOWN	N	N	N	Y	Y	22.94	6.03
TBIG023222	XLOC_023222	SUSD1	Sushi domain-containing protein 1 [Source:SWISS;Acc:Q6UWL2]	3.47	0.452	-2.94	0.03285	0.709124	yes	DOWN	N	N	N	Y	Y	3.75	0.42
TBIG022434	ENSRNOG00000013598.L01	Melk	maternal embryonic leucine zipper kinase [Source:RGD Symbol;Acc:1308974]	2.82	0.261	-3.43	0.0332	0.713145	yes	DOWN	N	N	N	Y	Y	3.05	0.24
TBIG026785	ENSRNOG00000030264	Fam83h	family with sequence similarity 83, member H [Source:RGD Symbol;Acc:1305866]	44.1	15	-1.56	0.03335	0.714957	yes	DOWN	N	N	N	Y	Y	47.74	13.97
TBIG017100	ENSRNOG00000027157.L01	Ly6g6e	lymphocyte antigen 6 complex, locus G6E [Source:RGD Symbol;Acc:1303112]	70.7	18.2	-1.95	0.0335	0.716762	yes	DOWN	N	N	N	Y	Y	76.41	16.96
TBIG021502	ENSRNOG00000011387.L01	Tet3	tet methylcytosine dioxygenase 3 [Source:RGD Symbol;Acc:1590584]	14.6	4.93	-1.57	0.03365	0.717856	yes	DOWN	N	N	N	Y	Y	15.8	4.59
TBIG006545	XLOC_006545	Pol	Retrovirus-related Pol polyprotein LINE-1 [Source:SWISS;Acc:P11369]	1.06	0.206	-2.37	0.0337	0.718219	yes	DOWN	N	N	N	Y	Y	1.15	0.19
TBIG016277	ENSRNOG00000016477.L01	Vangl1	VANGL planar cell polarity protein 1 [Source:RGD Symbol;Acc:1597324]	27.2	9.21	-1.56	0.03415	0.725679	yes	DOWN	N	N	N	Y	Y	29.38	8.58
TBIG008654	ENSRNOG00000004487.L01	Nek2	NIMA-related kinase 2 [Source:RGD Symbol;Acc:619792]	2.31	0.247	-3.22	0.03425	0.725681	yes	DOWN	N	N	N	Y	Y	2.5	0.23
TBIG014533	XLOC_014533	Ap1g1	AP-1 complex subunit gamma-1 [Source:SWISS;Acc:P22892]	5.62	1.76	-1.67	0.03435	0.725681	yes	DOWN	N	N	N	Y	Y	6.07	1.64
TBIG016115	ENSRNOG00000010124.L01	Trim2	tripartite motif-containing 2 [Source:RGD Symbol;Acc:1310981]	16.1	5.35	-1.59	0.03435	0.725681	yes	DOWN	N	N	N	Y	Y	17.42	4.98
TBIG026255	ENSRNOG00000012835.L01	Espl1	extra spindle pole bodies homolog 1 (S. cerevisiae) [Source:RGD Symbol;Acc:1306266]	2.45	0.504	-2.28	0.03435	0.725681	yes	DOWN	N	N	N	Y	Y	2.65	0.47
TBIG005807	ENSRNOG00000011907.L01	Krt23	keratin 23 (histone deacetylase inducible) [Source:RGD Symbol;Acc:1308838]	106	29.4	-1.86	0.03445	0.727089	yes	DOWN	N	N	N	Y	Y	114.96	27.32
TBIG028015	ENSRNOG00000009005.L01	Slco2a1	solute carrier organic anion transporter family, member 2a1 [Source:RGD Symbol;Acc:3051]	17.5	5.6	-1.64	0.0345	0.727435	yes	DOWN	N	N	N	Y	Y	18.86	5.21
TBIG021865	ENSRNOG00000001804.L01	Itpr2	inositol 1,4,5-trisphosphate receptor, type 2 [Source:EntrezGene;Acc:81678]	11.8	4.05	-1.55	0.0346	0.727435	yes	DOWN	N	N	N	Y	Y	12.79	3.77
TBIG007650	ENSRNOG00000001192	Gltp	glycolipid transfer protein [Source:RGD Symbol;Acc:1564442]	176	57.2	-1.62	0.03475	0.729181	yes	DOWN	N	N	N	Y	Y	189.76	53.22
TBIG005751	ENSRNOG00000049998.L02	B4galnt2	beta-1,4-N-acetyl-galactosaminyl transferase 2 [Source:MGI Symbol;Acc:MGI:1342058]	19.4	5.87	-1.73	0.03485	0.730575	yes	DOWN	N	N	N	Y	Y	20.96	5.46
TBIG013490	ENSRNOG00000043304.L01	Apcdd1	adenomatosis polyposis coli down-regulated 1 [Source:RGD Symbol;Acc:1589962]	41.9	14.8	-1.5	0.03495	0.731264	yes	DOWN	N	N	N	Y	Y	45.3	13.81
TBIG015765	ENSRNOG00000018003.L01	F2rl1	coagulation factor II (thrombin) receptor-like 1 [Source:RGD Symbol;Acc:620866]	16.5	5.52	-1.58	0.03505	0.732653	yes	DOWN	N	N	N	Y	Y	17.79	5.14
TBIG018228	ENSRNOG00000001547	Agps	alkylglycerone phosphate synthase [Source:RGD Symbol;Acc:620364]	23	6.73	-1.77	0.03515	0.733335	yes	DOWN	N	N	N	Y	Y	24.82	6.26
TBIG010636	ENSRNOG00000017828.L01	Egr3	early growth response 3 [Source:RGD Symbol;Acc:2545]	2.89	0.304	-3.25	0.03525	0.734016	yes	DOWN	N	N	N	Y	Y	3.13	0.28
TBIG028386	ENSRNOG00000008305.L01	Sc5d	sterol-C5-desaturase [Source:RGD Symbol;Acc:620775]	25.7	8.05	-1.68	0.03525	0.734016	yes	DOWN	N	N	N	Y	Y	27.77	7.5
TBIG014282	ENSRNOG00000016752.L01	Crispld2	cysteine-rich secretory protein LCCL domain containing 2 [Source:RGD Symbol;Acc:620860]	31.3	10.7	-1.56	0.03535	0.735031	yes	DOWN	N	N	N	Y	Y	33.85	9.92
TBIG011880	ENSRNOG00000013167	Hmgb2	high mobility group box 2 [Source:RGD Symbol;Acc:69291]	79.7	28.3	-1.49	0.0356	0.73848	yes	DOWN	N	N	N	Y	Y	86.14	26.36
TBIG005667	ENSRNOG00000030021.L01	Ccl6	chemokine (C-C motif) ligand 6 [Source:RGD Symbol;Acc:1303200]	19.4	5.22	-1.89	0.0361	0.745302	yes	DOWN	N	N	N	Y	Y	20.92	4.87
TBIG025887	ENSRNOG00000004635	Kera	keratocan [Source:RGD Symbol;Acc:1305816]	2.67	0.294	-3.18	0.0362	0.746659	yes	DOWN	N	N	N	Y	Y	2.88	0.27
TBIG005371	ENSRNOG00000012575.L01	Fat2	FAT atypical cadherin 2 [Source:RGD Symbol;Acc:620656]	13.3	4.58	-1.54	0.0364	0.749365	yes	DOWN	N	N	N	Y	Y	14.36	4.26
TBIG018196	ENSRNOG00000009620.L01	Cybrd1	cytochrome b reductase 1 [Source:RGD Symbol;Acc:1305740]	5.15	1.49	-1.79	0.03655	0.751034	yes	DOWN	N	N	N	Y	Y	5.57	1.39
TBIG025623	XLOC_025623	-	-	12.1	1.24	-3.28	0.0367	0.752696	yes	DOWN	N	N	N	Y	Y	13.07	1.16
TBIG013602	XLOC_013602	Garem	GRB2-associated and regulator of MAPK protein [Source:SWISS;Acc:Q3UFT3]	19.1	2.45	-2.96	0.03685	0.752936	yes	DOWN	N	N	N	Y	Y	20.71	2.28
TBIG009461	ENSRNOG00000002175.L01	LOC100911602	circadian locomoter output cycles protein kaput-like [Source:RGD Symbol;Acc:6492097]	13.5	4.08	-1.73	0.0373	0.760703	yes	DOWN	N	N	N	Y	Y	14.59	3.8
TBIG016146	ENSRNOG00000019414.L01	Tmem79	transmembrane protein 79 [Source:RGD Symbol;Acc:1309886]	19	6.07	-1.65	0.03765	0.765691	yes	DOWN	N	N	N	Y	Y	20.55	5.64
TBIG002430	ENSRNOG00000017440	Bgn	biglycan [Source:RGD Symbol;Acc:2207]	98.4	29.7	-1.73	0.0378	0.767608	yes	DOWN	N	N	N	Y	Y	106.25	27.66
TBIG006884	ENSRNOG00000030285.L01	Epha3	Eph receptor A3 [Source:RGD Symbol;Acc:68389]	3.05	0.778	-1.97	0.03785	0.767608	yes	DOWN	N	N	N	Y	Y	3.3	0.73
TBIG023223	ENSRNOG00000016334.L01	Ptbp3	polypyrimidine tract binding protein 3 [Source:RGD Symbol;Acc:621671]	36.8	13.5	-1.45	0.0381	0.769811	yes	DOWN	N	N	N	Y	Y	39.68	12.58
TBIG015077	ENSRNOG00000013140.L01	Pdzd2	PDZ domain containing 2 [Source:RGD Symbol;Acc:619958]	13	4.8	-1.43	0.03815	0.770107	yes	DOWN	N	N	N	Y	Y	14.03	4.47
TBIG014233	ENSRNOG00000016953.L01	Chst4	carbohydrate (N-acetylglucosamine 6-O) sulfotransferase 4 [Source:RGD Symbol;Acc:1310798]	5.95	1.59	-1.91	0.03835	0.773427	yes	DOWN	N	N	N	Y	Y	6.43	1.48
TBIG005834	ENSRNOG00000014441	Krt16	keratin 16 [Source:RGD Symbol;Acc:1590901]	10.5	1.11	-3.23	0.03845	0.774727	yes	DOWN	N	N	N	Y	Y	11.3	1.03
TBIG002385	ENSRNOG00000019770.L01	Bnc1	basonuclin 1 [Source:RGD Symbol;Acc:1309042]	0.704	0.088	-3	0.03855	0.776024	yes	DOWN	N	N	N	Y	Y	0.76	0.08
TBIG021626	ENSRNOG00000010430.L01	Tmem40	transmembrane protein 40 [Source:RGD Symbol;Acc:1587025]	10.6	2.11	-2.32	0.03865	0.776601	yes	DOWN	N	N	N	Y	Y	11.41	1.96
TBIG027611	ENSRNOG00000015357	Bmper	BMP-binding endothelial regulator [Source:RGD Symbol;Acc:1563373]	2.12	0.446	-2.25	0.0387	0.776889	yes	DOWN	N	N	N	Y	Y	2.29	0.42
TBIG027921	XLOC_027921	Myo5a	Unconventional myosin-Va [Source:SWISS;Acc:Q9QYF3]	19.4	6.44	-1.59	0.03875	0.777177	yes	DOWN	N	N	N	Y	Y	20.96	6
TBIG022571	ENSRNOG00000010514.L01	Cachd1	cache domain containing 1 [Source:RGD Symbol;Acc:1310770]	11.7	4.26	-1.46	0.0388	0.777463	yes	DOWN	N	N	N	Y	Y	12.67	3.97
TBIG006016	ENSRNOG00000047314.L01	Tk1	thymidine kinase 1, soluble [Source:RGD Symbol;Acc:621014]	17	3.58	-2.25	0.0389	0.778036	yes	DOWN	N	N	N	Y	Y	18.35	3.33
TBIG030054	ENSRNOG00000013213	Epha4	Eph receptor A4 [Source:RGD Symbol;Acc:1560587]	5.68	1.88	-1.59	0.0389	0.778036	yes	DOWN	N	N	N	Y	Y	6.13	1.75
TBIG026752	ENSRNOG00000007818.L01	Slc45a4	solute carrier family 45, member 4 [Source:RGD Symbol;Acc:1309971]	26.5	8.66	-1.61	0.0391	0.779028	yes	DOWN	N	N	N	Y	Y	28.6	8.05
TBIG010518	XLOC_010518	-	-	20.6	5.26	-1.97	0.03915	0.779028	yes	DOWN	N	N	N	Y	Y	22.26	4.9
TBIG029393	ENSRNOG00000012830.L01	Paqr8	progestin and adipoQ receptor family member VIII [Source:RGD Symbol;Acc:1311710]	10.5	3.58	-1.55	0.0392	0.779028	yes	DOWN	N	N	N	Y	Y	11.31	3.33
TBIG030101	ENSRNOG00000022911.L01	Hjurp	Holliday junction recognition protein [Source:RGD Symbol;Acc:1305846]	7.66	2.5	-1.62	0.03925	0.779311	yes	DOWN	N	N	N	Y	Y	8.27	2.32
TBIG000061	ENSRNOG00000013994.L01	Enpp1	ectonucleotide pyrophosphatase/phosphodiesterase 1 [Source:RGD Symbol;Acc:628825]	13.7	4.51	-1.6	0.0395	0.782848	yes	DOWN	N	N	N	Y	Y	14.79	4.19
TBIG020886	ENSRNOG00000012364.L01	Prickle2	prickle homolog 2 (Drosophila) [Source:RGD Symbol;Acc:1306723]	4.03	1.22	-1.73	0.0395	0.782848	yes	DOWN	N	N	N	Y	Y	4.36	1.13
TBIG006900	ENSRNOG00000001554.L01	RGD1563888	similar to DNA segment, Chr 16, ERATO Doi 472, expressed [Source:RGD Symbol;Acc:1563888]	12.8	4.8	-1.42	0.0398	0.785496	yes	DOWN	N	N	N	Y	Y	13.85	4.47
TBIG022378	ENSRNOG00000006170.L01	Bach2	BTB and CNC homology 1, basic leucine zipper transcription factor 2 [Source:RGD Symbol;Acc:1562865]	3.42	1.02	-1.75	0.0398	0.785496	yes	DOWN	N	N	N	Y	Y	3.7	0.95
TBIG005202	ENSRNOG00000007483.L01	Ccnf	cyclin F [Source:RGD Symbol;Acc:67401]	4.09	0.817	-2.32	0.03985	0.785496	yes	DOWN	N	N	N	Y	Y	4.42	0.76
TBIG008418	ENSRNOG00000037211	Kif14	kinesin family member 14 [Source:RGD Symbol;Acc:1310650]	0.891	0.0998	-3.16	0.03985	0.785496	yes	DOWN	N	N	N	Y	Y	0.96	0.09
TBIG012706	ENSRNOG00000015410	Aspn	asporin [Source:RGD Symbol;Acc:1549776]	6.22	1.23	-2.34	0.0405	0.790707	yes	DOWN	N	N	N	Y	Y	6.72	1.15
TBIG021048	XLOC_021048	Clec2d6	C-type lectin domain family 2 member D6 [Source:SWISS;Acc:A4KWA8]	17.9	6.71	-1.42	0.04055	0.790707	yes	DOWN	N	N	N	Y	Y	19.35	6.25
TBIG006811	XLOC_006811	Liph	Lipase member H [Source:SWISS;Acc:Q32PY2]	5.53	1.18	-2.23	0.0407	0.791506	yes	DOWN	N	N	N	Y	Y	5.97	1.1
TBIG011432	ENSRNOG00000020270.L01	Anxa8	annexin A8 [Source:RGD Symbol;Acc:1307719]	256	83.6	-1.62	0.04085	0.792301	yes	DOWN	N	N	N	Y	Y	276.82	77.75
TBIG024504	ENSRNOG00000009344.L01	Syt16	synaptotagmin XVI [Source:RGD Symbol;Acc:1564654]	9.99	2.99	-1.74	0.0412	0.792736	yes	DOWN	N	N	N	Y	Y	10.79	2.79
TBIG023275	ENSRNOG00000042603.L01	Ttc39b	tetratricopeptide repeat domain 39B [Source:RGD Symbol;Acc:1305797]	9.06	3.23	-1.49	0.0414	0.794479	yes	DOWN	N	N	N	Y	Y	9.79	3.01
TBIG004363	ENSRNOG00000007419.L01	LOC100362038	pantothenate kinase 3 [Source:RGD Symbol;Acc:2318942]	15.9	5.75	-1.47	0.04155	0.796655	yes	DOWN	N	N	N	Y	Y	17.14	5.36
TBIG008746	ENSRNOG00000028368	Etnk2	ethanolamine kinase 2 [Source:RGD Symbol;Acc:1305304]	3.68	0.805	-2.19	0.04195	0.802206	yes	DOWN	N	N	N	Y	Y	3.97	0.75
TBIG010438	ENSRNOG00000030694	Rnase1l2	ribonuclease, RNase A family, 1-like 2 (pancreatic) [Source:RGD Symbol;Acc:1565230]	7.06	0.863	-3.03	0.042	0.802458	yes	DOWN	N	N	N	Y	Y	7.63	0.8
TBIG000096	ENSRNOG00000016103.L01	Nkd2	naked cuticle homolog 2 (Drosophila) [Source:RGD Symbol;Acc:1311459]	8.42	2.87	-1.55	0.0425	0.810147	yes	DOWN	N	N	N	Y	Y	9.1	2.67
TBIG022539	ENSRNOG00000008036.L01	Dennd4c	DENN/MADD domain containing 4C [Source:MGI Symbol;Acc:MGI:1914769]	10.5	3.74	-1.49	0.04255	0.810147	yes	DOWN	N	N	N	Y	Y	11.34	3.48
TBIG022430	ENSRNOG00000014863.L01	Reck	reversion-inducing-cysteine-rich protein with kazal motifs [Source:RGD Symbol;Acc:1308845]	13.7	5.15	-1.42	0.04265	0.810147	yes	DOWN	N	N	N	Y	Y	14.84	4.79
TBIG028310	ENSRNOG00000008515	Tmem45b	transmembrane protein 45b [Source:RGD Symbol;Acc:1305586]	5.73	1.49	-1.95	0.04265	0.810147	yes	DOWN	N	N	N	Y	Y	6.19	1.39
TBIG000159	ENSRNOG00000014166.L01	Smoc2	SPARC related modular calcium binding 2 [Source:RGD Symbol;Acc:1306681]	8.1	2.4	-1.75	0.04275	0.81039	yes	DOWN	N	N	N	Y	Y	8.75	2.24
TBIG006772	ENSRNOG00000001730.L01	Acap2	ArfGAP with coiled-coil, ankyrin repeat and PH domains 2 [Source:RGD Symbol;Acc:1562939]	10.8	3.97	-1.45	0.04285	0.811579	yes	DOWN	N	N	N	Y	Y	11.68	3.7
TBIG012414	ENSRNOG00000016581.L01	Serpinb1a	serine (or cysteine) proteinase inhibitor, clade B, member 1a [Source:RGD Symbol;Acc:1306203]	246	85.9	-1.52	0.04305	0.813951	yes	DOWN	N	N	N	Y	Y	265.99	79.97
TBIG002291	XLOC_002291	Mrgprb3	Mas-related G-protein coupled receptor member B3 [Source:SWISS;Acc:Q91ZC1]	20.4	3.95	-2.37	0.0432	0.813961	yes	DOWN	N	N	N	Y	Y	22.08	3.69
TBIG011605	ENSRNOG00000011424	Cldn23	claudin 23 [Source:RGD Symbol;Acc:1309001]	44.8	17.1	-1.39	0.0434	0.816317	yes	DOWN	N	N	N	Y	Y	48.47	15.88
TBIG021245	ENSRNOG00000033618.L01	Col28a1	collagen, type XXVIII, alpha 1 [Source:RGD Symbol;Acc:1564680]	4.38	1.19	-1.88	0.0436	0.819372	yes	DOWN	N	N	N	Y	Y	4.73	1.11
TBIG020524	ENSRNOG00000006030.L01	Ptprz1	protein tyrosine phosphatase, receptor-type, Z polypeptide 1 [Source:RGD Symbol;Acc:3455]	14.1	5.15	-1.45	0.04395	0.820991	yes	DOWN	N	N	N	Y	Y	15.2	4.8
TBIG022776	ENSRNOG00000031475.L01	Col16a1	collagen, type XVI, alpha 1 [Source:RGD Symbol;Acc:1310982]	12.3	4.42	-1.47	0.04395	0.820991	yes	DOWN	N	N	N	Y	Y	13.29	4.11
TBIG025979	ENSRNOG00000006060.L01	Matn2	matrilin 2 [Source:RGD Symbol;Acc:1305353]	32.7	11.8	-1.47	0.04395	0.820991	yes	DOWN	N	N	N	Y	Y	35.37	11.01
TBIG018669	ENSRNOG00000008165.L01	Tpx2	TPX2, microtubule-associated [Source:RGD Symbol;Acc:1311894]	6.97	0.949	-2.88	0.04415	0.82261	yes	DOWN	N	N	N	Y	Y	7.52	0.88
TBIG021325	ENSRNOG00000013428.L01	Atp6v0a4	ATPase, H+ transporting, lysosomal V0 subunit A4 [Source:RGD Symbol;Acc:1305055]	2.62	0.266	-3.3	0.0445	0.827715	yes	DOWN	N	N	N	Y	Y	2.83	0.25
TBIG009943	ENSRNOG00000028108.L01	Cytl1	cytokine like 1 [Source:RGD Symbol;Acc:1561846]	139	46	-1.6	0.04465	0.829797	yes	DOWN	N	N	N	Y	Y	150.43	42.81
TBIG006795	ENSRNOG00000001924.L01	Tp63	tumor protein p63 [Source:RGD Symbol;Acc:620863]	82.1	25.4	-1.69	0.0451	0.833183	yes	DOWN	N	N	N	Y	Y	88.65	23.67
TBIG015756	ENSRNOG00000050343.L01	Jmy	junction-mediating and regulatory protein [Source:MGI Symbol;Acc:MGI:1913096]	15.3	3.7	-2.05	0.0457	0.839285	yes	DOWN	N	N	N	Y	Y	16.57	3.44
TBIG027743	ENSRNOG00000016085	Mpzl2	myelin protein zero-like 2 [Source:RGD Symbol;Acc:1307196]	79.3	30.2	-1.39	0.04595	0.842455	yes	DOWN	N	N	N	Y	Y	85.69	28.15
TBIG012358	XLOC_012358	-	-	1.78	0.594	-1.58	0.046	0.842663	yes	DOWN	N	N	N	Y	Y	1.92	0.55
TBIG017332	ENSRNOG00000000321	Cd24	CD24 molecule [Source:RGD Symbol;Acc:2298]	205	72	-1.51	0.0464	0.848255	yes	DOWN	N	N	N	Y	Y	221.3	67.08
TBIG016272	ENSRNOG00000015655	Ptgfrn	prostaglandin F2 receptor inhibitor [Source:RGD Symbol;Acc:3437]	16.7	6.36	-1.39	0.0465	0.848255	yes	DOWN	N	N	N	Y	Y	18.03	5.92
TBIG016393	ENSRNOG00000011284.L01	Sgms2	sphingomyelin synthase 2 [Source:RGD Symbol;Acc:1305778]	4.38	1.31	-1.74	0.0466	0.848646	yes	DOWN	N	N	N	Y	Y	4.73	1.22
TBIG018724	ENSRNOG00000006236.L01	Dsn1	DSN1, MIS12 kinetochore complex component [Source:RGD Symbol;Acc:1565179]	3.92	0.676	-2.53	0.0466	0.848646	yes	DOWN	N	N	N	Y	Y	4.23	0.63
TBIG001300	ENSRNOG00000020784	Kcnk7	potassium channel, subfamily K, member 7 [Source:RGD Symbol;Acc:1565025]	13.1	1.73	-2.91	0.0467	0.848646	yes	DOWN	N	N	N	Y	Y	14.11	1.61
TBIG017288	ENSRNOG00000000805.L01	Gja1	gap junction protein, alpha 1 [Source:RGD Symbol;Acc:2690]	45.7	17.8	-1.36	0.0468	0.848646	yes	DOWN	N	N	N	Y	Y	49.36	16.56
TBIG015330	ENSRNOG00000010741.L01	Tigd4	tigger transposable element derived 4 [Source:RGD Symbol;Acc:1305780]	1.86	0.235	-2.98	0.04685	0.848646	yes	DOWN	N	N	N	Y	Y	2.01	0.22
TBIG022881	ENSRNOG00000009222	Epha2	Eph receptor A2 [Source:RGD Symbol;Acc:1307204]	42.3	16.4	-1.37	0.04695	0.848646	yes	DOWN	N	N	N	Y	Y	45.77	15.24
TBIG024510	XLOC_024510	Syne2	Nesprin-2 [Source:SWISS;Acc:Q6ZWQ0]	33.6	9.97	-1.75	0.04695	0.848646	yes	DOWN	N	N	N	Y	Y	36.23	9.27
TBIG004637	ENSRNOG00000008040	Fam64a	family with sequence similarity 64, member A [Source:RGD Symbol;Acc:1308747]	4.88	0.652	-2.9	0.04715	0.849194	yes	DOWN	N	N	N	Y	Y	5.27	0.61
TBIG008678	ENSRNOG00000014859.L01	Rnf152	ring finger protein 152 [Source:RGD Symbol;Acc:1305251]	2.61	0.688	-1.92	0.04715	0.849194	yes	DOWN	N	N	N	Y	Y	2.81	0.64
TBIG008383	ENSRNOG00000003031.L01	Atp2b4	ATPase, Ca++ transporting, plasma membrane 4 [Source:RGD Symbol;Acc:621305]	10.2	4.15	-1.3	0.04745	0.849194	yes	DOWN	N	N	N	Y	Y	11.03	3.87
TBIG003028	ENSRNOG00000021140.L01	Kcnk4	potassium channel, subfamily K, member 4 [Source:RGD Symbol;Acc:621449]	13.7	4.85	-1.5	0.0475	0.849194	yes	DOWN	N	N	N	Y	Y	14.8	4.52
TBIG016212	ENSRNOG00000020923.L01	Tuft1	tuftelin 1 [Source:RGD Symbol;Acc:1310373]	39.9	14.6	-1.45	0.0475	0.849194	yes	DOWN	N	N	N	Y	Y	43.09	13.56
TBIG013661	ENSRNOG00000018646	Hbegf	heparin-binding EGF-like growth factor [Source:RGD Symbol;Acc:2526]	16.4	5.11	-1.69	0.04755	0.849194	yes	DOWN	N	N	N	Y	Y	17.75	4.75
TBIG015579	ENSRNOG00000020470.L01	Slc25a24	solute carrier family 25 (mitochondrial carrier, phosphate carrier), member 24 [Source:RGD Symbol;Acc:1311982]	17.9	6.49	-1.46	0.0478	0.849194	yes	DOWN	N	N	N	Y	Y	19.32	6.05
TBIG023402	ENSRNOG00000019100.L01	Kif2c	kinesin family member 2C [Source:RGD Symbol;Acc:620239]	2.97	0.433	-2.78	0.0478	0.849194	yes	DOWN	N	N	N	Y	Y	3.2	0.4
TBIG027917	ENSRNOG00000007876.L01	Wdr72	WD repeat domain 72 [Source:RGD Symbol;Acc:1563550]	6	1.84	-1.71	0.0479	0.849194	yes	DOWN	N	N	N	Y	Y	6.48	1.71
TBIG022705	ENSRNOG00000011502	Col9a2	collagen, type IX, alpha 2 [Source:RGD Symbol;Acc:1307029]	26.7	10.4	-1.37	0.04795	0.849194	yes	DOWN	N	N	N	Y	Y	28.9	9.63
TBIG030151	ENSRNOG00000034177.L01	Efna5	ephrin A5 [Source:RGD Symbol;Acc:620391]	5.82	1.56	-1.9	0.04805	0.849194	yes	DOWN	N	N	N	Y	Y	6.29	1.46
TBIG027479	XLOC_027479	-	-	3.42	0.457	-2.9	0.0481	0.849194	yes	DOWN	N	N	N	Y	Y	3.7	0.43
TBIG012998	XLOC_012998	-	-	1.74	0	#NAME?	0.04815	0.849194	yes	DOWN	N	N	N	Y	Y	1.88	0
TBIG013195	XLOC_013195	Nedd4	E3 ubiquitin-protein ligase NEDD4 [Source:SWISS;Acc:P46935]	0.611	0	#NAME?	0.04815	0.849194	yes	DOWN	N	N	N	Y	Y	0.66	0
TBIG014683	XLOC_014683	-	-	0.78	0	#NAME?	0.04815	0.849194	yes	DOWN	N	N	N	Y	Y	0.84	0
TBIG014686	XLOC_014686	-	-	0.91	0	#NAME?	0.04815	0.849194	yes	DOWN	N	N	N	Y	Y	0.98	0
TBIG015067	ENSRNOG00000051143	Ranbp3l	RAN binding protein 3-like [Source:RGD Symbol;Acc:1307559]	3.3	0	#NAME?	0.04815	0.849194	yes	DOWN	N	N	N	Y	Y	3.57	0
TBIG016646	XLOC_016646	-	-	0.586	0	#NAME?	0.04815	0.849194	yes	DOWN	N	N	N	Y	Y	0.63	0
TBIG023955	XLOC_023955	-	-	0.629	0	#NAME?	0.04815	0.849194	yes	DOWN	N	N	N	Y	Y	0.68	0
TBIG029308	ENSRNOG00000049939	AABR06058583.1	Uncharacterized protein [Source:UniProtKB/TrEMBL;Acc:M0RD07]	1.99	0	#NAME?	0.04815	0.849194	yes	DOWN	N	N	N	Y	Y	2.15	0
TBIG009951	ENSRNOG00000006845.L01	Psapl1	prosaposin-like 1 [Source:RGD Symbol;Acc:1307368]	27.8	5.04	-2.47	0.0486	0.850366	yes	DOWN	N	N	N	Y	Y	30.11	4.69
TBIG006224	XLOC_006224	-	-	0.66	0	#NAME?	0.04875	0.850366	yes	DOWN	N	N	N	Y	Y	0.71	0
TBIG009049	XLOC_009049	-	-	5.3	0	#NAME?	0.04875	0.850366	yes	DOWN	N	N	N	Y	Y	5.72	0
TBIG013127	XLOC_013127	-	-	0.753	0	#NAME?	0.04875	0.850366	yes	DOWN	N	N	N	Y	Y	0.81	0
TBIG027429	XLOC_027429	-	-	0.75	0	#NAME?	0.04875	0.850366	yes	DOWN	N	N	N	Y	Y	0.81	0
TBIG010959	ENSRNOG00000008855	Gjb2	gap junction protein, beta 2 [Source:RGD Symbol;Acc:728891]	25.7	10.1	-1.36	0.04885	0.850366	yes	DOWN	N	N	N	Y	Y	27.8	9.37
TBIG030019	ENSRNOG00000014960.L01	Bard1	BRCA1 associated RING domain 1 [Source:RGD Symbol;Acc:621072]	1.72	0.297	-2.53	0.04885	0.850366	yes	DOWN	N	N	N	Y	Y	1.86	0.28
TBIG000960	ENSRNOG00000036790.L01	Olfml1	olfactomedin-like 1 [Source:RGD Symbol;Acc:1311854]	11.7	4.08	-1.51	0.049	0.850366	yes	DOWN	N	N	N	Y	Y	12.59	3.8
TBIG012697	ENSRNOG00000014130	LOC100362620	CDC28 protein kinase regulatory subunit 2 [Source:RGD Symbol;Acc:2324338]	25	5.65	-2.15	0.0495	0.850366	yes	DOWN	N	N	N	Y	Y	27.05	5.26
TBIG021078	ENSRNOG00000047736	Kcna6	potassium voltage gated channel, shaker related subfamily, member 6 [Source:RGD Symbol;Acc:62083]	1.1	0.157	-2.81	0.0499	0.852449	yes	DOWN	N	N	N	Y	Y	1.18	0.15
TBIG001010	XLOC_001010	-	-	0	1.34	inf	5e-05	0.0726033	yes	UP	N	Y	Y	Y	Y	0	1.24
TBIG008392	ENSRNOG00000003336.L01	Mybph	myosin binding protein H [Source:RGD Symbol;Acc:620287]	9.69	67.4	2.8	5e-05	0.0726033	yes	UP	N	Y	Y	Y	Y	10.47	62.66
TBIG008922	XLOC_008922	Itln1	Intelectin-1a [Source:SWISS;Acc:O88310]	0	5.24	inf	5e-05	0.0726033	yes	UP	N	Y	Y	Y	Y	0	4.88
TBIG020384	XLOC_020384	-	-	0	1.47	inf	5e-05	0.0726033	yes	UP	N	Y	Y	Y	Y	0	1.37
TBIG023762	XLOC_023762	gag	Retrovirus-related Gag polyprotein [Source:SWISS;Acc:P11365]	0	3.13	inf	5e-05	0.0726033	yes	UP	N	Y	Y	Y	Y	0	2.92
TBIG026827	ENSRNOG00000006471.L01	Pvalb	parvalbumin [Source:RGD Symbol;Acc:3457]	6.57	1290	7.61	5e-05	0.0726033	yes	UP	N	Y	Y	Y	Y	7.1	1198.44
TBIG018078	XLOC_018078	Gm10881	Ig kappa chain V-V region L7 [Source:SWISS;Acc:P01642]	0	27.4	inf	0.0001	0.121006	yes	UP	N	N	Y	Y	Y	0	25.54
TBIG002354	ENSRNOG00000015086.L01	Plin1	perilipin 1 [Source:RGD Symbol;Acc:3351]	0	0.995	inf	0.0002	0.155579	yes	UP	N	N	Y	Y	Y	0	0.93
TBIG001057	ENSRNOG00000014652	Aqp8	aquaporin 8 [Source:RGD Symbol;Acc:2146]	0	1.38	inf	0.0002	0.155579	yes	UP	N	N	Y	Y	Y	0	1.28
TBIG004551	XLOC_004551	MYH13	Myosin-13 [Source:SWISS;Acc:Q9UKX3]	19.6	244	3.64	0.0002	0.155579	yes	UP	N	N	Y	Y	Y	21.17	226.87
TBIG003650	XLOC_003650	pol	Pol polyprotein [Source:SWISS;Acc:P31795]	10.7	77	2.85	0.0003	0.21781	yes	UP	N	N	Y	Y	Y	11.51	71.62
TBIG012014	ENSRNOG00000011754.L01	Myom2	myomesin 2 [Source:RGD Symbol;Acc:631437]	4.7	35	2.89	0.0003	0.21781	yes	UP	N	N	Y	Y	Y	5.08	32.55
TBIG002222	ENSRNOG00000019627.L01	Mybpc2	myosin binding protein C, fast-type [Source:RGD Symbol;Acc:1311596]	10.2	132	3.7	0.0005	0.258627	yes	UP	N	N	Y	Y	Y	10.99	122.77
TBIG022871	ENSRNOG00000007574.L01	Padi2	peptidyl arginine deiminase, type II [Source:RGD Symbol;Acc:3288]	4.79	33.9	2.82	0.00055	0.258627	yes	UP	N	N	Y	Y	Y	5.18	31.52
TBIG026683	ENSRNOG00000007999	Abra	actin-binding Rho activating protein [Source:RGD Symbol;Acc:708493]	10.3	58.2	2.49	0.00055	0.258627	yes	UP	N	N	Y	Y	Y	11.16	54.09
TBIG018670	ENSRNOG00000008235.L01	Mylk2	myosin light chain kinase 2 [Source:RGD Symbol;Acc:620934]	4.87	32.2	2.73	0.00065	0.258627	yes	UP	N	N	Y	Y	Y	5.26	29.94
TBIG010339	ENSRNOG00000013034	Dupd1	dual specificity phosphatase and pro isomerase domain containing 1 [Source:RGD Symbol;Acc:1310229]	2.19	45.6	4.38	0.00105	0.258627	yes	UP	N	N	Y	Y	Y	2.37	42.42
TBIG022617	ENSRNOG00000008001	Rab3b	RAB3B, member RAS oncogene family [Source:RGD Symbol;Acc:620922]	1.97	41.7	4.41	0.0011	0.258627	yes	UP	N	N	Y	Y	Y	2.13	38.82
TBIG011384	XLOC_011384	Dnah12	Dynein heavy chain 12, axonemal [Source:SWISS;Acc:Q923J6]	0	2.46	inf	0.00115	0.258627	yes	UP	N	N	Y	Y	Y	0	2.29
TBIG030928	ENSRNOG00000019213	Gpd1	glycerol-3-phosphate dehydrogenase 1 (soluble) [Source:RGD Symbol;Acc:621381]	10.3	60.2	2.55	0.00115	0.258627	yes	UP	N	N	Y	Y	Y	11.13	55.98
TBIG020991	ENSRNOG00000048169.L01	Tuba8	tubulin, alpha 8 [Source:RGD Symbol;Acc:1566041]	15.8	86.6	2.45	0.0013	0.258627	yes	UP	N	N	Y	Y	Y	17.09	80.57
TBIG026142	XLOC_026142	pol	Pol polyprotein [Source:SWISS;Acc:P26809]	3.77	20	2.41	0.0013	0.258627	yes	UP	N	N	Y	Y	Y	4.08	18.62
TBIG001495	ENSRNOG00000018598	Ankrd1	ankyrin repeat domain 1 [Source:RGD Symbol;Acc:61989]	13.9	81.1	2.54	0.00135	0.258627	yes	UP	N	N	Y	Y	Y	15.05	75.51
TBIG028010	ENSRNOG00000008210.L01	Ky	kyphoscoliosis peptidase [Source:RGD Symbol;Acc:1305407]	6.28	33.8	2.43	0.0014	0.258627	yes	UP	N	N	Y	Y	Y	6.79	31.49
TBIG011943	ENSRNOG00000011518	Dusp26	dual specificity phosphatase 26 (putative) [Source:RGD Symbol;Acc:1310090]	4.86	42.1	3.11	0.00145	0.258627	yes	UP	N	N	Y	Y	Y	5.26	39.13
TBIG007677	XLOC_007677	-	-	7.07	34.2	2.27	0.0015	0.258627	yes	UP	N	N	Y	Y	Y	7.63	31.8
TBIG000359	ENSRNOG00000016603.L01	Rtn2	reticulon 2 [Source:RGD Symbol;Acc:1303245]	51.2	261	2.35	0.00205	0.258627	yes	UP	N	N	Y	Y	Y	55.4	242.94
TBIG011957	XLOC_011957	-	-	0.481	7.5	3.96	0.0021	0.258627	yes	UP	N	N	Y	Y	Y	0.52	6.99
TBIG000838	ENSRNOG00000017716.L01	Ucp3	uncoupling protein 3 (mitochondrial, proton carrier) [Source:RGD Symbol;Acc:3933]	10.3	51.6	2.33	0.0022	0.258627	yes	UP	N	N	Y	Y	Y	11.1	48.05
TBIG001165	ENSRNOG00000018978.L01	Cd163l1	CD163 molecule-like 1 [Source:RGD Symbol;Acc:1307378]	3.17	20.9	2.72	0.0023	0.258627	yes	UP	N	N	Y	Y	Y	3.43	19.47
TBIG022699	ENSRNOG00000037451.L01	LOC100912735	uncharacterized LOC100912735 [Source:RGD Symbol;Acc:6485680]	0	43.5	inf	0.0026	0.258627	yes	UP	N	N	Y	Y	Y	0	40.37
TBIG022778	ENSRNOG00000012879	Fabp3	fatty acid binding protein 3, muscle and heart [Source:RGD Symbol;Acc:69048]	128	799	2.64	0.0026	0.258627	yes	UP	N	N	Y	Y	Y	138.58	743.08
TBIG011276	XLOC_011276	-	-	0	5.02	inf	0.0028	0.258627	yes	UP	N	N	Y	Y	Y	0	4.67
TBIG003448	XLOC_003448	-	-	0	1.55	inf	0.00285	0.258627	yes	UP	N	N	Y	Y	Y	0	1.44
TBIG022253	XLOC_022253	-	-	0	1.09	inf	0.00285	0.258627	yes	UP	N	N	Y	Y	Y	0	1.02
TBIG021862	XLOC_021862	-	-	0	1.86	inf	0.00305	0.258627	yes	UP	N	N	Y	Y	Y	0	1.73
TBIG027029	ENSRNOG00000036827	Ppp1r1a	protein phosphatase 1, regulatory (inhibitor) subunit 1A [Source:RGD Symbol;Acc:62018]	4.32	26.7	2.63	0.0032	0.258627	yes	UP	N	N	Y	Y	Y	4.67	24.84
TBIG004142	XLOC_004142	-	-	0	3.5	inf	0.00325	0.258627	yes	UP	N	N	Y	Y	Y	0	3.26
TBIG010538	ENSRNOG00000019019	Fitm1	fat storage-inducing transmembrane protein 1 [Source:RGD Symbol;Acc:1306911]	24.1	116	2.27	0.00325	0.258627	yes	UP	N	N	Y	Y	Y	26.09	108.36
TBIG013927	XLOC_013927	-	-	0	1.68	inf	0.00325	0.258627	yes	UP	N	N	Y	Y	Y	0	1.56
TBIG018076	XLOC_018076	KV206_HUMAN	Ig kappa chain V-II region RPMI 6410 [Source:SWISS;Acc:P06310]	0	10	inf	0.00325	0.258627	yes	UP	N	N	Y	Y	Y	0	9.32
TBIG020296	XLOC_020296	-	-	0	0.946	inf	0.00325	0.258627	yes	UP	N	N	Y	Y	Y	0	0.88
TBIG003917	XLOC_003917	-	-	0	1.35	inf	0.0033	0.258627	yes	UP	N	N	Y	Y	Y	0	1.26
TBIG006283	XLOC_006283	-	-	0	1.73	inf	0.0033	0.258627	yes	UP	N	N	Y	Y	Y	0	1.61
TBIG006284	XLOC_006284	-	-	0	1.6	inf	0.0033	0.258627	yes	UP	N	N	Y	Y	Y	0	1.49
TBIG020022	XLOC_020022	-	-	0	1.33	inf	0.0033	0.258627	yes	UP	N	N	Y	Y	Y	0	1.24
TBIG025737	ENSRNOG00000032951	Jsrp1	junctional sarcoplasmic reticulum protein 1 [Source:RGD Symbol;Acc:1596084]	31.7	136	2.1	0.00345	0.258627	yes	UP	N	N	Y	Y	Y	34.3	126.44
TBIG003378	XLOC_003378	-	-	0	1.45	inf	0.00355	0.258627	yes	UP	N	N	Y	Y	Y	0	1.35
TBIG005181	XLOC_005181	-	-	0	24.8	inf	0.00355	0.258627	yes	UP	N	N	Y	Y	Y	0	23.05
TBIG021910	XLOC_021910	-	-	0	1.44	inf	0.00355	0.258627	yes	UP	N	N	Y	Y	Y	0	1.34
TBIG025631	XLOC_025631	Fmn1	Formin-1 [Source:SWISS;Acc:Q05860]	0	1.16	inf	0.00355	0.258627	yes	UP	N	N	Y	Y	Y	0	1.08
TBIG027250	XLOC_027250	-	-	0	2.71	inf	0.00355	0.258627	yes	UP	N	N	Y	Y	Y	0	2.52
TBIG004143	XLOC_004143	-	-	0	10.5	inf	0.00375	0.258627	yes	UP	N	N	Y	Y	Y	0	9.75
TBIG006261	XLOC_006261	-	-	0	1.35	inf	0.00375	0.258627	yes	UP	N	N	Y	Y	Y	0	1.26
TBIG009097	XLOC_009097	-	-	0	0.676	inf	0.00375	0.258627	yes	UP	N	N	Y	Y	Y	0	0.63
TBIG009188	XLOC_009188	-	-	0	1.2	inf	0.00375	0.258627	yes	UP	N	N	Y	Y	Y	0	1.12
TBIG015753	XLOC_015753	-	-	0	2.58	inf	0.00375	0.258627	yes	UP	N	N	Y	Y	Y	0	2.4
TBIG016775	XLOC_016775	-	-	0	1.07	inf	0.00375	0.258627	yes	UP	N	N	Y	Y	Y	0	1
TBIG023811	XLOC_023811	-	-	0	5.98	inf	0.00375	0.258627	yes	UP	N	N	Y	Y	Y	0	5.57
TBIG028527	XLOC_028527	-	-	0	2.27	inf	0.00375	0.258627	yes	UP	N	N	Y	Y	Y	0	2.11
TBIG031535	XLOC_031535	-	-	0	7.71	inf	0.00375	0.258627	yes	UP	N	N	Y	Y	Y	0	7.18
TBIG031587	XLOC_031587	-	-	0	1.54	inf	0.00375	0.258627	yes	UP	N	N	Y	Y	Y	0	1.43
TBIG005320	ENSRNOG00000046377.L01	LOC684480	similar to butyrophilin 3 [Source:RGD Symbol;Acc:1590287]	1.62	13	3	0.0039	0.258627	yes	UP	N	N	Y	Y	Y	1.76	12.09
TBIG005026	ENSRNOG00000028456.L01	Ush1g	Usher syndrome 1G [Source:RGD Symbol;Acc:1304551]	0	0.683	inf	0.00405	0.258627	yes	UP	N	N	Y	Y	Y	0	0.63
TBIG015129	ENSRNOG00000010805.L01	Fabp4	fatty acid binding protein 4, adipocyte [Source:RGD Symbol;Acc:69309]	137	671	2.29	0.0041	0.258627	yes	UP	N	N	Y	Y	Y	147.75	623.92
TBIG018483	ENSRNOG00000008609.L01	Capn3	calpain 3 [Source:RGD Symbol;Acc:2269]	7.61	39.1	2.36	0.00415	0.258627	yes	UP	N	N	Y	Y	Y	8.22	36.35
TBIG002207	ENSRNOG00000047662	Klk1c12	kallikrein 1-related peptidase C12 [Source:RGD Symbol;Acc:1303192]	0	1.95	inf	0.0044	0.258627	yes	UP	N	N	Y	Y	Y	0	1.81
TBIG003754	XLOC_003754	-	-	0	1.61	inf	0.0044	0.258627	yes	UP	N	N	Y	Y	Y	0	1.5
TBIG004574	ENSRNOG00000026548	Dhrs7c	dehydrogenase/reductase (SDR family) member 7C [Source:RGD Symbol;Acc:1306989]	56	249	2.15	0.0044	0.258627	yes	UP	N	N	Y	Y	Y	60.54	231.58
TBIG008618	XLOC_008618	DNAH14	Dynein heavy chain 14, axonemal [Source:SWISS;Acc:Q0VDD8]	0	2.12	inf	0.0044	0.258627	yes	UP	N	N	Y	Y	Y	0	1.97
TBIG011037	ENSRNOG00000011177	Sftpc	surfactant protein C [Source:RGD Symbol;Acc:3666]	0	1.86	inf	0.0044	0.258627	yes	UP	N	N	Y	Y	Y	0	1.73
TBIG014834	XLOC_014834	-	-	0	1.26	inf	0.0044	0.258627	yes	UP	N	N	Y	Y	Y	0	1.17
TBIG019920	XLOC_019920	-	-	0	4.52	inf	0.0044	0.258627	yes	UP	N	N	Y	Y	Y	0	4.21
TBIG022105	XLOC_022105	-	-	0	1.69	inf	0.0044	0.258627	yes	UP	N	N	Y	Y	Y	0	1.58
TBIG023849	XLOC_023849	-	-	0	0.973	inf	0.0044	0.258627	yes	UP	N	N	Y	Y	Y	0	0.91
TBIG023895	XLOC_023895	-	-	0	1.26	inf	0.0044	0.258627	yes	UP	N	N	Y	Y	Y	0	1.17
TBIG028959	XLOC_028959	-	-	0	1.24	inf	0.0044	0.258627	yes	UP	N	N	Y	Y	Y	0	1.16
TBIG030402	XLOC_030402	-	-	0	1.24	inf	0.0044	0.258627	yes	UP	N	N	Y	Y	Y	0	1.15
TBIG017578	ENSRNOG00000000606.L01	Pcdh15	protocadherin 15 [Source:RGD Symbol;Acc:1590969]	0.051	0.726	3.83	0.0045	0.258627	yes	UP	N	N	Y	Y	Y	0.06	0.67
TBIG006252	XLOC_006252	-	-	0	2.4	inf	0.00455	0.258627	yes	UP	N	N	Y	Y	Y	0	2.23
TBIG006404	XLOC_006404	-	-	0	2.41	inf	0.00455	0.258627	yes	UP	N	N	Y	Y	Y	0	2.24
TBIG009139	XLOC_009139	-	-	0	2.38	inf	0.00455	0.258627	yes	UP	N	N	Y	Y	Y	0	2.21
TBIG009200	XLOC_009200	-	-	0	1.01	inf	0.00455	0.258627	yes	UP	N	N	Y	Y	Y	0	0.94
TBIG010141	XLOC_010141	-	-	0	1.86	inf	0.00455	0.258627	yes	UP	N	N	Y	Y	Y	0	1.73
TBIG016550	XLOC_016550	env	Envelope glycoprotein [Source:SWISS;Acc:P06752]	0	1.15	inf	0.00455	0.258627	yes	UP	N	N	Y	Y	Y	0	1.07
TBIG016604	XLOC_016604	-	-	0	2.67	inf	0.00455	0.258627	yes	UP	N	N	Y	Y	Y	0	2.48
TBIG020250	XLOC_020250	-	-	0	16.7	inf	0.00455	0.258627	yes	UP	N	N	Y	Y	Y	0	15.58
TBIG020291	XLOC_020291	-	-	0	1.52	inf	0.00455	0.258627	yes	UP	N	N	Y	Y	Y	0	1.41
TBIG020365	XLOC_020365	-	-	0	2.69	inf	0.00455	0.258627	yes	UP	N	N	Y	Y	Y	0	2.5
TBIG022076	XLOC_022076	-	-	0	1.21	inf	0.00455	0.258627	yes	UP	N	N	Y	Y	Y	0	1.13
TBIG022113	XLOC_022113	-	-	0	0.663	inf	0.00455	0.258627	yes	UP	N	N	Y	Y	Y	0	0.62
TBIG022154	XLOC_022154	-	-	0	3.19	inf	0.00455	0.258627	yes	UP	N	N	Y	Y	Y	0	2.97
TBIG022199	XLOC_022199	-	-	0	1.28	inf	0.00455	0.258627	yes	UP	N	N	Y	Y	Y	0	1.19
TBIG027140	XLOC_027140	-	-	0	1.57	inf	0.00455	0.258627	yes	UP	N	N	Y	Y	Y	0	1.46
TBIG027446	XLOC_027446	-	-	0	6.38	inf	0.00455	0.258627	yes	UP	N	N	Y	Y	Y	0	5.94
TBIG005742	ENSRNOG00000003998.L01	Sgca	sarcoglycan, alpha (dystrophin-associated glycoprotein) [Source:RGD Symbol;Acc:1308062]	24.2	91.5	1.92	0.00475	0.258627	yes	UP	N	N	Y	Y	Y	26.17	85.14
TBIG005781	ENSRNOG00000004518.L01	Cacnb1	calcium channel, voltage-dependent, beta 1 subunit [Source:RGD Symbol;Acc:68382]	3.93	17.6	2.16	0.0049	0.258627	yes	UP	N	N	Y	Y	Y	4.25	16.33
TBIG018027	ENSRNOG00000049056.L01	Ak1	adenylate kinase 1 [Source:MGI Symbol;Acc:MGI:87977]	24.3	106	2.12	0.005	0.258627	yes	UP	N	N	Y	Y	Y	26.22	98.36
TBIG005937	ENSRNOG00000003245	Cacng1	calcium channel, voltage-dependent, gamma subunit 1 [Source:RGD Symbol;Acc:2249]	15	64.3	2.1	0.00515	0.258627	yes	UP	N	N	Y	Y	Y	16.2	59.85
TBIG011976	ENSRNOG00000018241.L01	Ank1	ankyrin 1, erythrocytic [Source:RGD Symbol;Acc:1309620]	33.1	154	2.21	0.0052	0.258627	yes	UP	N	N	Y	Y	Y	35.81	143.09
TBIG003412	XLOC_003412	-	-	0	0.796	inf	0.00535	0.258627	yes	UP	N	N	Y	Y	Y	0	0.74
TBIG004173	XLOC_004173	-	-	0	1.3	inf	0.00535	0.258627	yes	UP	N	N	Y	Y	Y	0	1.21
TBIG006350	XLOC_006350	-	-	0	2.15	inf	0.00535	0.258627	yes	UP	N	N	Y	Y	Y	0	2
TBIG006514	XLOC_006514	-	-	0	1.61	inf	0.00535	0.258627	yes	UP	N	N	Y	Y	Y	0	1.5
TBIG007254	XLOC_007254	-	-	0	1.12	inf	0.00535	0.258627	yes	UP	N	N	Y	Y	Y	0	1.04
TBIG009141	XLOC_009141	-	-	0	1.6	inf	0.00535	0.258627	yes	UP	N	N	Y	Y	Y	0	1.49
TBIG009190	XLOC_009190	-	-	0	1.41	inf	0.00535	0.258627	yes	UP	N	N	Y	Y	Y	0	1.31
TBIG011149	XLOC_011149	-	-	0	1.86	inf	0.00535	0.258627	yes	UP	N	N	Y	Y	Y	0	1.73
TBIG011164	XLOC_011164	-	-	0	1.53	inf	0.00535	0.258627	yes	UP	N	N	Y	Y	Y	0	1.42
TBIG012062	XLOC_012062	-	-	0	15	inf	0.00535	0.258627	yes	UP	N	N	Y	Y	Y	0	13.98
TBIG012100	XLOC_012100	-	-	0	12.2	inf	0.00535	0.258627	yes	UP	N	N	Y	Y	Y	0	11.33
TBIG012158	XLOC_012158	-	-	0	2.2	inf	0.00535	0.258627	yes	UP	N	N	Y	Y	Y	0	2.05
TBIG013056	XLOC_013056	-	-	0	0.693	inf	0.00535	0.258627	yes	UP	N	N	Y	Y	Y	0	0.64
TBIG013174	XLOC_013174	-	-	0	3.08	inf	0.00535	0.258627	yes	UP	N	N	Y	Y	Y	0	2.87
TBIG013943	XLOC_013943	-	-	0	12.6	inf	0.00535	0.258627	yes	UP	N	N	Y	Y	Y	0	11.69
TBIG014752	XLOC_014752	-	-	0	0.742	inf	0.00535	0.258627	yes	UP	N	N	Y	Y	Y	0	0.69
TBIG016479	XLOC_016479	Pol	Retrovirus-related Pol polyprotein LINE-1 [Source:SWISS;Acc:P11369]	0	1.28	inf	0.00535	0.258627	yes	UP	N	N	Y	Y	Y	0	1.19
TBIG017726	XLOC_017726	-	-	0	3.07	inf	0.00535	0.258627	yes	UP	N	N	Y	Y	Y	0	2.85
TBIG017672	XLOC_017672	-	-	0	29.4	inf	0.00535	0.258627	yes	UP	N	N	Y	Y	Y	0	27.4
TBIG019985	XLOC_019985	-	-	0	1.74	inf	0.00535	0.258627	yes	UP	N	N	Y	Y	Y	0	1.62
TBIG020128	XLOC_020128	-	-	0	3.87	inf	0.00535	0.258627	yes	UP	N	N	Y	Y	Y	0	3.61
TBIG020297	XLOC_020297	-	-	0	1.59	inf	0.00535	0.258627	yes	UP	N	N	Y	Y	Y	0	1.48
TBIG021945	XLOC_021945	-	-	0	2.24	inf	0.00535	0.258627	yes	UP	N	N	Y	Y	Y	0	2.08
TBIG021950	XLOC_021950	-	-	0	1.4	inf	0.00535	0.258627	yes	UP	N	N	Y	Y	Y	0	1.3
TBIG020610	XLOC_020610	TVB1_MOUSE	T-cell receptor beta chain V region 3H.25 [Source:SWISS;Acc:P01734]	0	11.6	inf	0.00535	0.258627	yes	UP	N	N	Y	Y	Y	0	10.85
TBIG022035	XLOC_022035	-	-	0	1.59	inf	0.00535	0.258627	yes	UP	N	N	Y	Y	Y	0	1.48
TBIG023797	XLOC_023797	-	-	0	1.01	inf	0.00535	0.258627	yes	UP	N	N	Y	Y	Y	0	0.94
TBIG023814	XLOC_023814	-	-	0	4.22	inf	0.00535	0.258627	yes	UP	N	N	Y	Y	Y	0	3.93
TBIG024121	XLOC_024121	-	-	0	13.6	inf	0.00535	0.258627	yes	UP	N	N	Y	Y	Y	0	12.62
TBIG024195	XLOC_024195	-	-	0	3	inf	0.00535	0.258627	yes	UP	N	N	Y	Y	Y	0	2.79
TBIG024213	XLOC_024213	-	-	0	22.7	inf	0.00535	0.258627	yes	UP	N	N	Y	Y	Y	0	21.14
TBIG025341	XLOC_025341	-	-	0	0.96	inf	0.00535	0.258627	yes	UP	N	N	Y	Y	Y	0	0.89
TBIG027174	XLOC_027174	-	-	0	1.87	inf	0.00535	0.258627	yes	UP	N	N	Y	Y	Y	0	1.74
TBIG027221	XLOC_027221	-	-	0	0.948	inf	0.00535	0.258627	yes	UP	N	N	Y	Y	Y	0	0.88
TBIG027352	XLOC_027352	-	-	0	0.747	inf	0.00535	0.258627	yes	UP	N	N	Y	Y	Y	0	0.69
TBIG029071	XLOC_029071	-	-	0	4.6	inf	0.00535	0.258627	yes	UP	N	N	Y	Y	Y	0	4.28
TBIG029078	XLOC_029078	TR22_MOUSE	Putative transposase element L1Md-A101/L1Md-A102/L1Md-A2 [Source:SWISS;Acc:P11260]	0	3.7	inf	0.00535	0.258627	yes	UP	N	N	Y	Y	Y	0	3.44
TBIG030319	XLOC_030319	-	-	0	1.29	inf	0.00535	0.258627	yes	UP	N	N	Y	Y	Y	0	1.2
TBIG029572	XLOC_029572	-	-	0	1.84	inf	0.00535	0.258627	yes	UP	N	N	Y	Y	Y	0	1.71
TBIG030446	XLOC_030446	-	-	0	1.58	inf	0.00535	0.258627	yes	UP	N	N	Y	Y	Y	0	1.47
TBIG031509	XLOC_031509	Pol	Retrovirus-related Pol polyprotein LINE-1 [Source:SWISS;Acc:P11369]	0	1.83	inf	0.00535	0.258627	yes	UP	N	N	Y	Y	Y	0	1.7
TBIG022810	ENSRNOG00000016543.L01	Trim63	tripartite motif containing 63, E3 ubiquitin protein ligase [Source:RGD Symbol;Acc:619964]	15.2	71.5	2.23	0.00555	0.258627	yes	UP	N	N	Y	Y	Y	16.46	66.44
TBIG003513	XLOC_003513	-	-	0	1.88	inf	0.0057	0.258627	yes	UP	N	N	Y	Y	Y	0	1.75
TBIG003632	XLOC_003632	-	-	0	1.31	inf	0.0057	0.258627	yes	UP	N	N	Y	Y	Y	0	1.22
TBIG003759	XLOC_003759	Elmod3	ELMO domain-containing protein 3 [Source:SWISS;Acc:Q5XIQ2]	0	2.65	inf	0.0057	0.258627	yes	UP	N	N	Y	Y	Y	0	2.46
TBIG006144	XLOC_006144	-	-	0	0.991	inf	0.0057	0.258627	yes	UP	N	N	Y	Y	Y	0	0.92
TBIG004570	ENSRNOG00000050042	Myh8	myosin, heavy chain 8, skeletal muscle, perinatal [Source:RGD Symbol;Acc:620356]	8.7	35	2.01	0.0057	0.258627	yes	UP	N	N	Y	Y	Y	9.4	32.58
TBIG005666	ENSRNOG00000028548	Ccl9	chemokine (C-C motif) ligand 9 [Source:RGD Symbol;Acc:1310563]	0	0.684	inf	0.0057	0.258627	yes	UP	N	N	Y	Y	Y	0	0.64
TBIG006527	XLOC_006527	-	-	0	1.66	inf	0.0057	0.258627	yes	UP	N	N	Y	Y	Y	0	1.55
TBIG006532	XLOC_006532	-	-	0	1.76	inf	0.0057	0.258627	yes	UP	N	N	Y	Y	Y	0	1.64
TBIG008260	XLOC_008260	-	-	0	1.49	inf	0.0057	0.258627	yes	UP	N	N	Y	Y	Y	0	1.38
TBIG009098	XLOC_009098	-	-	0	1.33	inf	0.0057	0.258627	yes	UP	N	N	Y	Y	Y	0	1.24
TBIG009127	XLOC_009127	-	-	0	2.39	inf	0.0057	0.258627	yes	UP	N	N	Y	Y	Y	0	2.23
TBIG011369	XLOC_011369	-	-	0	2.91	inf	0.0057	0.258627	yes	UP	N	N	Y	Y	Y	0	2.71
TBIG012092	XLOC_012092	Nedd4	E3 ubiquitin-protein ligase NEDD4 [Source:SWISS;Acc:P46935]	0	1.06	inf	0.0057	0.258627	yes	UP	N	N	Y	Y	Y	0	0.99
TBIG012157	XLOC_012157	-	-	0	5.47	inf	0.0057	0.258627	yes	UP	N	N	Y	Y	Y	0	5.09
TBIG013897	XLOC_013897	-	-	0	0.886	inf	0.0057	0.258627	yes	UP	N	N	Y	Y	Y	0	0.82
TBIG013984	XLOC_013984	-	-	0	1.42	inf	0.0057	0.258627	yes	UP	N	N	Y	Y	Y	0	1.32
TBIG020024	XLOC_020024	-	-	0	1.41	inf	0.0057	0.258627	yes	UP	N	N	Y	Y	Y	0	1.31
TBIG022164	XLOC_022164	-	-	0	0.695	inf	0.0057	0.258627	yes	UP	N	N	Y	Y	Y	0	0.65
TBIG022285	ENSRNOG00000007540	Msc	musculin [Source:RGD Symbol;Acc:1305496]	0	2.02	inf	0.0057	0.258627	yes	UP	N	N	Y	Y	Y	0	1.88
TBIG025401	XLOC_025401	-	-	0	0.785	inf	0.0057	0.258627	yes	UP	N	N	Y	Y	Y	0	0.73
TBIG025426	XLOC_025426	-	-	0	3.17	inf	0.0057	0.258627	yes	UP	N	N	Y	Y	Y	0	2.95
TBIG027146	XLOC_027146	Fhl1	Four and a half LIM domains protein 1 [Source:SWISS;Acc:Q9WUH4]	0	1.7	inf	0.0057	0.258627	yes	UP	N	N	Y	Y	Y	0	1.58
TBIG027159	XLOC_027159	-	-	0	1.59	inf	0.0057	0.258627	yes	UP	N	N	Y	Y	Y	0	1.48
TBIG000621	ENSRNOG00000021027.L01	Dbp	D site of albumin promoter (albumin D-box) binding protein [Source:RGD Symbol;Acc:2491]	18.1	108	2.58	0.0059	0.258627	yes	UP	N	N	Y	Y	Y	19.56	100.43
TBIG020752	ENSRNOG00000049829.L01	Igkc	immunoglobulin kappa constant [Source:MGI Symbol;Acc:MGI:96495]	14.1	111	2.98	0.0062	0.258627	yes	UP	N	N	Y	Y	Y	15.19	103.59
TBIG001853	ENSRNOG00000014326.L01	Cacng6	calcium channel, voltage-dependent, gamma subunit 6 [Source:RGD Symbol;Acc:628806]	2.44	14.4	2.56	0.00625	0.258627	yes	UP	N	N	Y	Y	Y	2.64	13.38
TBIG003578	XLOC_003578	-	-	0	1.9	inf	0.00635	0.258627	yes	UP	N	N	Y	Y	Y	0	1.77
TBIG003603	XLOC_003603	-	-	0	3.76	inf	0.00635	0.258627	yes	UP	N	N	Y	Y	Y	0	3.5
TBIG003901	XLOC_003901	-	-	0	0.817	inf	0.00635	0.258627	yes	UP	N	N	Y	Y	Y	0	0.76
TBIG004020	XLOC_004020	-	-	0	1.13	inf	0.00635	0.258627	yes	UP	N	N	Y	Y	Y	0	1.06
TBIG002906	XLOC_002906	-	-	0	1.2	inf	0.00635	0.258627	yes	UP	N	N	Y	Y	Y	0	1.11
TBIG005229	ENSRNOG00000024181	Tpsab1	tryptase alpha/beta 1 [Source:RGD Symbol;Acc:3066]	0	0.836	inf	0.00635	0.258627	yes	UP	N	N	Y	Y	Y	0	0.78
TBIG006253	XLOC_006253	-	-	0	0.808	inf	0.00635	0.258627	yes	UP	N	N	Y	Y	Y	0	0.75
TBIG006332	XLOC_006332	-	-	0	3.5	inf	0.00635	0.258627	yes	UP	N	N	Y	Y	Y	0	3.25
TBIG020275	XLOC_020275	-	-	0	2.62	inf	0.00635	0.258627	yes	UP	N	N	Y	Y	Y	0	2.44
TBIG021952	XLOC_021952	-	-	0	1.08	inf	0.00635	0.258627	yes	UP	N	N	Y	Y	Y	0	1.01
TBIG022142	XLOC_022142	-	-	0	0.869	inf	0.00635	0.258627	yes	UP	N	N	Y	Y	Y	0	0.81
TBIG029940	XLOC_029940	-	-	0	1.35	inf	0.00635	0.258627	yes	UP	N	N	Y	Y	Y	0	1.26
TBIG030440	XLOC_030440	Wibg	Partner of Y14 and mago [Source:SWISS;Acc:Q8CHP5]	0	1.56	inf	0.00635	0.258627	yes	UP	N	N	Y	Y	Y	0	1.45
TBIG031508	XLOC_031508	Pol	Retrovirus-related Pol polyprotein LINE-1 [Source:SWISS;Acc:P11369]	0	1.09	inf	0.00635	0.258627	yes	UP	N	N	Y	Y	Y	0	1.01
TBIG027614	ENSRNOG00000006931.L01	Eepd1	endonuclease/exonuclease/phosphatase family domain containing 1 [Source:RGD Symbol;Acc:1307401]	8.26	33.8	2.03	0.0064	0.258627	yes	UP	N	N	Y	Y	Y	8.93	31.45
TBIG003485	XLOC_003485	-	-	0	2.45	inf	0.00645	0.258627	yes	UP	N	N	Y	Y	Y	0	2.28
TBIG003489	XLOC_003489	-	-	0	0.723	inf	0.00645	0.258627	yes	UP	N	N	Y	Y	Y	0	0.67
TBIG003567	XLOC_003567	-	-	0	1.69	inf	0.00645	0.258627	yes	UP	N	N	Y	Y	Y	0	1.57
TBIG001955	ENSRNOG00000038625.L01	Sbk2	SH3 domain binding kinase family, member 2 [Source:RGD Symbol;Acc:1563279]	12.7	48.3	1.92	0.00645	0.258627	yes	UP	N	N	Y	Y	Y	13.74	44.92
TBIG003858	XLOC_003858	-	-	0	2.34	inf	0.00645	0.258627	yes	UP	N	N	Y	Y	Y	0	2.18
TBIG003884	XLOC_003884	-	-	0	1.12	inf	0.00645	0.258627	yes	UP	N	N	Y	Y	Y	0	1.04
TBIG006117	XLOC_006117	-	-	0	2.67	inf	0.00645	0.258627	yes	UP	N	N	Y	Y	Y	0	2.48
TBIG006241	XLOC_006241	-	-	0	1.14	inf	0.00645	0.258627	yes	UP	N	N	Y	Y	Y	0	1.06
TBIG006256	XLOC_006256	-	-	0	0.851	inf	0.00645	0.258627	yes	UP	N	N	Y	Y	Y	0	0.79
TBIG006496	XLOC_006496	-	-	0	1.07	inf	0.00645	0.258627	yes	UP	N	N	Y	Y	Y	0	1
TBIG007041	XLOC_007041	-	-	0	186000	inf	0.00645	0.258627	yes	UP	N	N	Y	Y	Y	0	172699
TBIG007290	XLOC_007290	-	-	0	2.56	inf	0.00645	0.258627	yes	UP	N	N	Y	Y	Y	0	2.39
TBIG006798	ENSRNOG00000030462	Ostn	osteocrin [Source:RGD Symbol;Acc:1303110]	0	0.908	inf	0.00645	0.258627	yes	UP	N	N	Y	Y	Y	0	0.85
TBIG007330	XLOC_007330	-	-	0	2.88	inf	0.00645	0.258627	yes	UP	N	N	Y	Y	Y	0	2.68
TBIG009185	XLOC_009185	-	-	0	2.26	inf	0.00645	0.258627	yes	UP	N	N	Y	Y	Y	0	2.1
TBIG009193	XLOC_009193	-	-	0	2.85	inf	0.00645	0.258627	yes	UP	N	N	Y	Y	Y	0	2.66
TBIG009283	XLOC_009283	-	-	0	1.81	inf	0.00645	0.258627	yes	UP	N	N	Y	Y	Y	0	1.68
TBIG010208	XLOC_010208	-	-	0	1.32	inf	0.00645	0.258627	yes	UP	N	N	Y	Y	Y	0	1.22
TBIG010296	XLOC_010296	-	-	0	3.38	inf	0.00645	0.258627	yes	UP	N	N	Y	Y	Y	0	3.15
TBIG011142	XLOC_011142	-	-	0	3.01	inf	0.00645	0.258627	yes	UP	N	N	Y	Y	Y	0	2.8
TBIG011261	XLOC_011261	-	-	0	1.15	inf	0.00645	0.258627	yes	UP	N	N	Y	Y	Y	0	1.07
TBIG012166	XLOC_012166	-	-	0	13.1	inf	0.00645	0.258627	yes	UP	N	N	Y	Y	Y	0	12.17
TBIG011629	XLOC_011629	-	-	0	1.29	inf	0.00645	0.258627	yes	UP	N	N	Y	Y	Y	0	1.2
TBIG014675	XLOC_014675	-	-	0	4.36	inf	0.00645	0.258627	yes	UP	N	N	Y	Y	Y	0	4.06
TBIG014885	XLOC_014885	-	-	0	1.39	inf	0.00645	0.258627	yes	UP	N	N	Y	Y	Y	0	1.29
TBIG016559	XLOC_016559	-	-	0	1.51	inf	0.00645	0.258627	yes	UP	N	N	Y	Y	Y	0	1.4
TBIG016595	XLOC_016595	-	-	0	5.47	inf	0.00645	0.258627	yes	UP	N	N	Y	Y	Y	0	5.09
TBIG016708	XLOC_016708	-	-	0	13.8	inf	0.00645	0.258627	yes	UP	N	N	Y	Y	Y	0	12.88
TBIG016710	XLOC_016710	-	-	0	1.15	inf	0.00645	0.258627	yes	UP	N	N	Y	Y	Y	0	1.07
TBIG016874	XLOC_016874	-	-	0	3.31	inf	0.00645	0.258627	yes	UP	N	N	Y	Y	Y	0	3.08
TBIG015627	XLOC_015627	-	-	0	14.7	inf	0.00645	0.258627	yes	UP	N	N	Y	Y	Y	0	13.73
TBIG017755	XLOC_017755	-	-	0	44.8	inf	0.00645	0.258627	yes	UP	N	N	Y	Y	Y	0	41.7
TBIG019897	XLOC_019897	-	-	0	1.3	inf	0.00645	0.258627	yes	UP	N	N	Y	Y	Y	0	1.21
TBIG018097	XLOC_018097	Gm5571	Ig kappa chain V-V region MOPC 41 [Source:SWISS;Acc:P01639]	0	5.66	inf	0.00645	0.258627	yes	UP	N	N	Y	Y	Y	0	5.27
TBIG019952	XLOC_019952	-	-	0	5.32	inf	0.00645	0.258627	yes	UP	N	N	Y	Y	Y	0	4.96
TBIG020028	XLOC_020028	-	-	0	1.89	inf	0.00645	0.258627	yes	UP	N	N	Y	Y	Y	0	1.76
TBIG020040	XLOC_020040	-	-	0	1.46	inf	0.00645	0.258627	yes	UP	N	N	Y	Y	Y	0	1.36
TBIG020201	XLOC_020201	-	-	0	1.59	inf	0.00645	0.258627	yes	UP	N	N	Y	Y	Y	0	1.48
TBIG020292	XLOC_020292	-	-	0	2.52	inf	0.00645	0.258627	yes	UP	N	N	Y	Y	Y	0	2.35
TBIG021981	XLOC_021981	-	-	0	5.67	inf	0.00645	0.258627	yes	UP	N	N	Y	Y	Y	0	5.28
TBIG021996	XLOC_021996	-	-	0	0.799	inf	0.00645	0.258627	yes	UP	N	N	Y	Y	Y	0	0.74
TBIG022158	XLOC_022158	-	-	0	13.8	inf	0.00645	0.258627	yes	UP	N	N	Y	Y	Y	0	12.88
TBIG022340	XLOC_022340	-	-	0	10.7	inf	0.00645	0.258627	yes	UP	N	N	Y	Y	Y	0	10.01
TBIG023909	XLOC_023909	-	-	0	20	inf	0.00645	0.258627	yes	UP	N	N	Y	Y	Y	0	18.64
TBIG024141	XLOC_024141	-	-	0	2.46	inf	0.00645	0.258627	yes	UP	N	N	Y	Y	Y	0	2.29
TBIG025407	XLOC_025407	-	-	0	0.607	inf	0.00645	0.258627	yes	UP	N	N	Y	Y	Y	0	0.56
TBIG025419	XLOC_025419	-	-	0	1.91	inf	0.00645	0.258627	yes	UP	N	N	Y	Y	Y	0	1.77
TBIG025420	XLOC_025420	-	-	0	1.18	inf	0.00645	0.258627	yes	UP	N	N	Y	Y	Y	0	1.1
TBIG025482	XLOC_025482	Pol	Retrovirus-related Pol polyprotein LINE-1 [Source:SWISS;Acc:P11369]	0	0.838	inf	0.00645	0.258627	yes	UP	N	N	Y	Y	Y	0	0.78
TBIG027136	XLOC_027136	Pol	Retrovirus-related Pol polyprotein LINE-1 [Source:SWISS;Acc:P11369]	0	1.77	inf	0.00645	0.258627	yes	UP	N	N	Y	Y	Y	0	1.64
TBIG027242	XLOC_027242	-	-	0	1.92	inf	0.00645	0.258627	yes	UP	N	N	Y	Y	Y	0	1.79
TBIG027251	XLOC_027251	-	-	0	2.04	inf	0.00645	0.258627	yes	UP	N	N	Y	Y	Y	0	1.9
TBIG026044	ENSRNOG00000007628	Ptp4a3	protein tyrosine phosphatase type IVA, member 3 [Source:RGD Symbol;Acc:1308687]	58.8	268	2.19	0.00645	0.258627	yes	UP	N	N	Y	Y	Y	63.57	248.95
TBIG028958	XLOC_028958	-	-	0	0.818	inf	0.00645	0.258627	yes	UP	N	N	Y	Y	Y	0	0.76
TBIG029013	XLOC_029013	-	-	0	1.16	inf	0.00645	0.258627	yes	UP	N	N	Y	Y	Y	0	1.08
TBIG029060	XLOC_029060	-	-	0	1.88	inf	0.00645	0.258627	yes	UP	N	N	Y	Y	Y	0	1.75
TBIG029108	XLOC_029108	-	-	0	2.21	inf	0.00645	0.258627	yes	UP	N	N	Y	Y	Y	0	2.05
TBIG030190	XLOC_030190	-	-	0	21.3	inf	0.00645	0.258627	yes	UP	N	N	Y	Y	Y	0	19.84
TBIG030374	XLOC_030374	-	-	0	0.849	inf	0.00645	0.258627	yes	UP	N	N	Y	Y	Y	0	0.79
TBIG030438	XLOC_030438	-	-	0	0.917	inf	0.00645	0.258627	yes	UP	N	N	Y	Y	Y	0	0.85
TBIG031610	XLOC_031610	-	-	0	1.51	inf	0.00645	0.258627	yes	UP	N	N	Y	Y	Y	0	1.41
TBIG004309	ENSRNOG00000014641	Rpl3l	ribosomal protein L3-like [Source:RGD Symbol;Acc:1306315]	69.4	296	2.09	0.00665	0.258627	yes	UP	N	N	Y	Y	Y	75	274.87
TBIG009778	ENSRNOG00000002256	Art3	ADP-ribosyltransferase 3 [Source:RGD Symbol;Acc:628833]	28.5	121	2.09	0.00665	0.258627	yes	UP	N	N	Y	Y	Y	30.77	112.62
TBIG017339	ENSRNOG00000043199.L01	Bves	blood vessel epicardial substance [Source:RGD Symbol;Acc:1561100]	4.25	18.8	2.15	0.00665	0.258627	yes	UP	N	N	Y	Y	Y	4.59	17.52
TBIG025925	ENSRNOG00000005491.L01	Best3	bestrophin 3 [Source:RGD Symbol;Acc:1305439]	0.524	3.31	2.66	0.00665	0.258627	yes	UP	N	N	Y	Y	Y	0.57	3.08
TBIG001329	ENSRNOG00000021174	Macrod1	MACRO domain containing 1 [Source:RGD Symbol;Acc:628701]	54.7	227	2.05	0.0069	0.258627	yes	UP	N	N	Y	Y	Y	59.22	210.61
TBIG030041	ENSRNOG00000028656.L01	Ccdc108	coiled-coil domain containing 108 [Source:RGD Symbol;Acc:1563002]	3.79	16.6	2.13	0.0073	0.258627	yes	UP	N	N	Y	Y	Y	4.1	15.42
TBIG005251	XLOC_005251	Pdia2	Protein disulfide-isomerase A2 [Source:SWISS;Acc:D3Z6P0]	0.714	8.58	3.59	0.00735	0.258627	yes	UP	N	N	Y	Y	Y	0.77	7.97
TBIG008511	ENSRNOG00000004537.L01	Rxrg	retinoid X receptor gamma [Source:RGD Symbol;Acc:620046]	5.25	25.9	2.3	0.0075	0.262633	yes	UP	N	N	Y	Y	Y	5.68	24.12
TBIG018935	XLOC_018935	-	-	1.61	8.29	2.37	0.00765	0.266599	yes	UP	N	N	Y	Y	Y	1.74	7.72
TBIG013760	ENSRNOG00000017421.L01	Alpk2	alpha-kinase 2 [Source:RGD Symbol;Acc:1564431]	1.97	8.69	2.14	0.0077	0.267486	yes	UP	N	N	Y	Y	Y	2.13	8.08
TBIG027728	ENSRNOG00000006663.L01	Usp2	ubiquitin specific peptidase 2 [Source:RGD Symbol;Acc:621073]	5.56	23	2.05	0.00775	0.268794	yes	UP	N	N	Y	Y	Y	6.01	21.37
TBIG003664	XLOC_003664	-	-	0	4.1	inf	0.00805	0.274807	yes	UP	N	N	Y	Y	Y	0	3.82
TBIG018072	ENSRNOG00000031292	LOC100365438	mCG141619-like [Source:RGD Symbol;Acc:2319042]	0	4.26	inf	0.00805	0.274807	yes	UP	N	N	Y	Y	Y	0	3.97
TBIG018233	ENSRNOG00000038165	Dfnb59	deafness, autosomal recessive 59 [Source:RGD Symbol;Acc:1587131]	0	0.71	inf	0.00805	0.274807	yes	UP	N	N	Y	Y	Y	0	0.66
TBIG024135	XLOC_024135	-	-	0	0.625	inf	0.00805	0.274807	yes	UP	N	N	Y	Y	Y	0	0.58
TBIG030508	XLOC_030508	Ccdc146	Coiled-coil domain-containing protein 146 [Source:SWISS;Acc:Q66H60]	0	20.5	inf	0.00805	0.274807	yes	UP	N	N	Y	Y	Y	0	19.08
TBIG009129	XLOC_009129	-	-	0	1.27	inf	0.0081	0.274807	yes	UP	N	N	Y	Y	Y	0	1.19
TBIG009152	XLOC_009152	-	-	0	3.11	inf	0.0081	0.274807	yes	UP	N	N	Y	Y	Y	0	2.89
TBIG014341	XLOC_014341	-	-	0	1.06	inf	0.0081	0.274807	yes	UP	N	N	Y	Y	Y	0	0.99
TBIG016581	XLOC_016581	Pol	Retrovirus-related Pol polyprotein LINE-1 [Source:SWISS;Acc:P11369]	0	0.862	inf	0.0081	0.274807	yes	UP	N	N	Y	Y	Y	0	0.8
TBIG022757	XLOC_022757	CSMD2	CUB and sushi domain-containing protein 2 [Source:SWISS;Acc:Q7Z408]	0	0.821	inf	0.0081	0.274807	yes	UP	N	N	Y	Y	Y	0	0.76
TBIG024080	XLOC_024080	-	-	0	0.7	inf	0.0081	0.274807	yes	UP	N	N	Y	Y	Y	0	0.65
TBIG028037	ENSRNOG00000043480	Timm8a1	translocase of inner mitochondrial membrane 8 homolog A1 (yeast) [Source:RGD Symbol;Acc:621801]	0	13.4	inf	0.0081	0.274807	yes	UP	N	N	Y	Y	Y	0	12.45
TBIG029252	XLOC_029252	-	-	0	0.887	inf	0.0081	0.274807	yes	UP	N	N	Y	Y	Y	0	0.83
TBIG024802	ENSRNOG00000006146	Trim54	tripartite motif-containing 54 [Source:RGD Symbol;Acc:1306453]	54.8	201	1.88	0.00825	0.279027	yes	UP	N	N	Y	Y	Y	59.27	187.13
TBIG010958	ENSRNOG00000008847.L01	Gja3	gap junction protein, alpha 3 [Source:RGD Symbol;Acc:621820]	1.81	11.6	2.68	0.0084	0.28366	yes	UP	N	N	Y	Y	Y	1.95	10.79
TBIG011785	ENSRNOG00000048797.L01	Sftpd	surfactant protein D [Source:RGD Symbol;Acc:3667]	25.6	105	2.04	0.0085	0.285708	yes	UP	N	N	Y	Y	Y	27.69	97.65
TBIG013480	ENSRNOG00000018712.L01	CAMK2A	Uncharacterized protein [Source:UniProtKB/TrEMBL;Acc:F1LZG4]	3.61	13.9	1.94	0.0085	0.285708	yes	UP	N	N	Y	Y	Y	3.9	12.9
TBIG017566	ENSRNOG00000028356	Chchd10	coiled-coil-helix-coiled-coil-helix domain containing 10 [Source:RGD Symbol;Acc:1359417]	187	973	2.38	0.00855	0.286945	yes	UP	N	N	Y	Y	Y	202.66	904.56
TBIG029699	XLOC_029699	CROL3_HUMAN	Putative ciliary rootlet coiled-coil protein-like 3 protein [Source:SWISS;Acc:H7BZ55]	1.57	8.93	2.5	0.00865	0.289855	yes	UP	N	N	Y	Y	Y	1.7	8.32
TBIG024903	ENSRNOG00000039110.L01	Lsmem1	leucine-rich single-pass membrane protein 1 [Source:MGI Symbol;Acc:MGI:2685735]	3.18	15.7	2.3	0.00895	0.298988	yes	UP	N	N	Y	Y	Y	3.43	14.6
TBIG019745	ENSRNOG00000008170.L01	Jph2	junctophilin 2 [Source:RGD Symbol;Acc:1305196]	13	53.8	2.05	0.00905	0.301865	yes	UP	N	N	Y	Y	Y	14.08	50.05
TBIG012936	ENSRNOG00000026493.L01	Cdnf	cerebral dopamine neurotrophic factor [Source:RGD Symbol;Acc:1307600]	4	17.2	2.11	0.0092	0.306399	yes	UP	N	N	Y	Y	Y	4.32	16.02
TBIG015522	ENSRNOG00000018656.L01	Ampd1	adenosine monophosphate deaminase 1 [Source:RGD Symbol;Acc:2109]	29.1	134	2.2	0.00925	0.307125	yes	UP	N	N	Y	Y	Y	31.45	124.56
TBIG029299	ENSRNOG00000047860.L01	Plin5	perilipin 5 [Source:RGD Symbol;Acc:1589602]	4.44	21	2.25	0.00925	0.307125	yes	UP	N	N	Y	Y	Y	4.8	19.56
TBIG015476	ENSRNOG00000021200	Hfe2	hemochromatosis type 2 (juvenile) [Source:RGD Symbol;Acc:1310195]	39.9	166	2.06	0.0093	0.307847	yes	UP	N	N	Y	Y	Y	43.12	154.21
TBIG005886	ENSRNOG00000002753.L01	Adam11	ADAM metallopeptidase domain 11 [Source:RGD Symbol;Acc:1307515]	14.9	67.6	2.18	0.0094	0.310214	yes	UP	N	N	Y	Y	Y	16.15	62.94
TBIG000109	ENSRNOG00000032150	Adcy2	adenylate cyclase 2 (brain) [Source:RGD Symbol;Acc:619965]	9.92	37.8	1.93	0.0095	0.311626	yes	UP	N	N	Y	Y	Y	10.72	35.18
TBIG006732	ENSRNOG00000002721	LOC688963	similar to NADH dehydrogenase (ubiquinone) 1 beta subcomplex, 4, 15kDa [Source:RGD Symbol;Acc:1582944]	181	633	1.8	0.0095	0.311626	yes	UP	N	N	Y	Y	Y	196.21	588.65
TBIG029273	ENSRNOG00000046834.L01	C3	complement component 3 [Source:RGD Symbol;Acc:2232]	5.22	18.2	1.81	0.0096	0.314432	yes	UP	N	N	Y	Y	Y	5.64	16.96
TBIG018014	ENSRNOG00000010068.L01	Ppapdc3	phosphatidic acid phosphatase type 2 domain containing 3 [Source:RGD Symbol;Acc:1305821]	12.6	54.3	2.11	0.00965	0.314651	yes	UP	N	N	Y	Y	Y	13.57	50.53
TBIG001940	XLOC_001940	Dnaaf3	Dynein assembly factor 3, axonemal [Source:SWISS;Acc:D3ZCM9]	1.19	10.2	3.1	0.01015	0.330459	yes	UP	N	N	N	Y	Y	1.29	9.48
TBIG022569	ENSRNOG00000009889	Pgm1	phosphoglucomutase 1 [Source:RGD Symbol;Acc:3316]	30	125	2.06	0.01025	0.33272	yes	UP	N	N	N	Y	Y	32.43	116.7
TBIG008414	ENSRNOG00000046231.L01	Cacna1s	calcium channel, voltage-dependent, L type, alpha 1S subunit [Source:RGD Symbol;Acc:70983]	20.7	89.3	2.11	0.0104	0.337087	yes	UP	N	N	N	Y	Y	22.41	83.04
TBIG028058	ENSRNOG00000029586.L01	Cdhr4	cadherin-related family member 4 [Source:RGD Symbol;Acc:1306603]	5.59	26.7	2.26	0.0105	0.339822	yes	UP	N	N	N	Y	Y	6.04	24.87
TBIG019670	ENSRNOG00000016062.L01	Snta1	syntrophin, alpha 1 [Source:RGD Symbol;Acc:1307068]	18.2	65.5	1.84	0.01115	0.358198	yes	UP	N	N	N	Y	Y	19.72	60.9
TBIG025190	XLOC_025190	Ighm	Ig mu chain C region [Source:SWISS;Acc:P01872]	7.96	52	2.71	0.0114	0.364081	yes	UP	N	N	N	Y	Y	8.6	48.38
TBIG025875	ENSRNOG00000007407	Ndufa12	NADH dehydrogenase (ubiquinone) 1 alpha subcomplex, 12 [Source:RGD Symbol;Acc:1311462]	185	687	1.89	0.0114	0.364081	yes	UP	N	N	N	Y	Y	200.27	639
TBIG016164	XLOC_016164	-	-	59.2	228	1.94	0.0116	0.369926	yes	UP	N	N	N	Y	Y	63.97	211.78
TBIG023348	ENSRNOG00000012443.L01	Cpt2	carnitine palmitoyltransferase 2 [Source:RGD Symbol;Acc:2398]	18.5	63.1	1.77	0.01165	0.370436	yes	UP	N	N	N	Y	Y	19.97	58.67
TBIG015450	ENSRNOG00000021088.L01	Tmod4	tropomodulin 4 [Source:RGD Symbol;Acc:1308940]	51.5	232	2.17	0.0117	0.371484	yes	UP	N	N	N	Y	Y	55.65	215.78
TBIG002973	ENSRNOG00000019745.L01	Actn3	actinin alpha 3 [Source:RGD Symbol;Acc:621792]	0.658	198	8.23	0.0119	0.376189	yes	UP	N	N	N	Y	Y	0.71	183.86
TBIG005732	ENSRNOG00000003273.L01	Spata20	spermatogenesis associated 20 [Source:RGD Symbol;Acc:735087]	0.592	4.95	3.06	0.0121	0.380853	yes	UP	N	N	N	Y	Y	0.64	4.6
TBIG014141	ENSRNOG00000003011	Gadd45gip1	growth arrest and DNA-damage-inducible, gamma interacting protein 1 [Source:RGD Symbol;Acc:1309249]	33.7	116	1.79	0.0121	0.380853	yes	UP	N	N	N	Y	Y	36.48	108.02
TBIG023710	ENSRNOG00000013468.L01	Fam213b	family with sequence similarity 213, member B [Source:RGD Symbol;Acc:1308251]	11.4	62.1	2.45	0.01215	0.381324	yes	UP	N	N	N	Y	Y	12.3	57.81
TBIG025964	ENSRNOG00000008050.L01	Stac3	SH3 and cysteine rich domain 3 [Source:RGD Symbol;Acc:1308964]	23.9	94.7	1.98	0.01215	0.381324	yes	UP	N	N	N	Y	Y	25.87	88.05
TBIG016329	ENSRNOG00000019780	Sypl2	synaptophysin-like 2 [Source:RGD Symbol;Acc:1309907]	20.9	74.6	1.83	0.01225	0.383358	yes	UP	N	N	N	Y	Y	22.63	69.42
TBIG024858	XLOC_024858	-	-	3.81	16.8	2.14	0.01225	0.383358	yes	UP	N	N	N	Y	Y	4.12	15.65
TBIG016371	ENSRNOG00000014867.L01	Synpo2	synaptopodin 2 [Source:RGD Symbol;Acc:1564779]	11.4	40.8	1.83	0.0123	0.384371	yes	UP	N	N	N	Y	Y	12.36	37.93
TBIG007646	ENSRNOG00000001177	Acads	acyl-CoA dehydrogenase, C-2 to C-3 short chain [Source:RGD Symbol;Acc:620514]	32.9	108	1.72	0.01255	0.38939	yes	UP	N	N	N	Y	Y	35.59	100.82
TBIG028157	ENSRNOG00000019390.L01	Klhl40	kelch-like family member 40 [Source:RGD Symbol;Acc:1305368]	20.2	65.9	1.71	0.01275	0.394471	yes	UP	N	N	N	Y	Y	21.81	61.25
TBIG000418	ENSRNOG00000028900.L01	Cyp2a3	cytochrome P450, family 2, subfamily a, polypeptide 3 [Source:RGD Symbol;Acc:2465]	47.4	178	1.91	0.01285	0.397001	yes	UP	N	N	N	Y	Y	51.19	165.86
TBIG022031	XLOC_022031	pol	Pol polyprotein [Source:SWISS;Acc:P26808]	12	47.7	1.99	0.01295	0.398395	yes	UP	N	N	N	Y	Y	13.01	44.4
TBIG028040	ENSRNOG00000015718.L01	RGD1307461	similar to RIKEN cDNA 6430571L13 gene; similar to g20 protein [Source:RGD Symbol;Acc:1307461]	3.02	12.8	2.09	0.01295	0.398395	yes	UP	N	N	N	Y	Y	3.27	11.94
TBIG021864	ENSRNOG00000048961.L01	Bhlhe41	basic helix-loop-helix family, member e41 [Source:RGD Symbol;Acc:70900]	3.04	11.2	1.88	0.01305	0.400906	yes	UP	N	N	N	Y	Y	3.29	10.41
TBIG018988	ENSRNOG00000018145	Crat	carnitine O-acetyltransferase [Source:RGD Symbol;Acc:1303031]	51.8	210	2.02	0.0131	0.401875	yes	UP	N	N	N	Y	Y	56.01	195.29
TBIG004586	ENSRNOG00000005659.L01	Aurkb	aurora kinase B [Source:RGD Symbol;Acc:621625]	23.4	105	2.17	0.0133	0.406864	yes	UP	N	N	N	Y	Y	25.24	98.07
TBIG015445	ENSRNOG00000020992	Selenbp1	selenium binding protein 1 [Source:RGD Symbol;Acc:620571]	18.9	61.9	1.71	0.0134	0.408203	yes	UP	N	N	N	Y	Y	20.41	57.57
TBIG017237	ENSRNOG00000000383.L01	Mypn	myopalladin [Source:RGD Symbol;Acc:1308510]	10.7	36.7	1.78	0.01345	0.409154	yes	UP	N	N	N	Y	Y	11.52	34.15
TBIG004957	ENSRNOG00000050675	Myl4	myosin, light chain 4 [Source:RGD Symbol;Acc:1591197]	8.62	48.7	2.5	0.01375	0.416535	yes	UP	N	N	N	Y	Y	9.31	45.28
TBIG029674	ENSRNOG00000019926.L01	Ramp1	receptor (G protein-coupled) activity modifying protein 1 [Source:RGD Symbol;Acc:61870]	38	128	1.75	0.0138	0.417469	yes	UP	N	N	N	Y	Y	41.04	119.14
TBIG004327	ENSRNOG00000018611	Tpsb2	tryptase beta 2 [Source:RGD Symbol;Acc:3065]	2.69	20.9	2.95	0.01385	0.417821	yes	UP	N	N	N	Y	Y	2.91	19.42
TBIG004533	ENSRNOG00000002303.L01	Kcnj12	potassium inwardly-rectifying channel, subfamily J, member 12 [Source:RGD Symbol;Acc:621660]	3.39	13.5	1.99	0.014	0.421762	yes	UP	N	N	N	Y	Y	3.66	12.53
TBIG021738	ENSRNOG00000015290	Tpi1	triosephosphate isomerase 1 [Source:RGD Symbol;Acc:3896]	93.3	388	2.05	0.01405	0.422684	yes	UP	N	N	N	Y	Y	100.86	360.75
TBIG008929	ENSRNOG00000006930.L01	Casq1	calsequestrin 1 (fast-twitch, skeletal muscle) [Source:RGD Symbol;Acc:1586677]	82.1	464	2.5	0.01415	0.425105	yes	UP	N	N	N	Y	Y	88.75	431.54
TBIG022833	XLOC_022833	Asap3	Arf-GAP with SH3 domain, ANK repeat and PH domain-containing protein 3 [Source:SWISS;Acc:Q5U464]	30.9	126	2.03	0.0143	0.42843	yes	UP	N	N	N	Y	Y	33.36	116.9
TBIG029571	XLOC_029571	-	-	4.73	17.1	1.85	0.01475	0.438893	yes	UP	N	N	N	Y	Y	5.11	15.94
TBIG000791	ENSRNOG00000017311.L01	Me3	malic enzyme 3, NADP(+)-dependent, mitochondrial [Source:RGD Symbol;Acc:1311070]	8.7	35.7	2.04	0.0148	0.43978	yes	UP	N	N	N	Y	Y	9.4	33.18
TBIG011850	ENSRNOG00000012181	Lpl	lipoprotein lipase [Source:RGD Symbol;Acc:3017]	23.9	86	1.85	0.0149	0.441547	yes	UP	N	N	N	Y	Y	25.83	80.06
TBIG012918	ENSRNOG00000019057.L01	Prkcq	protein kinase C, theta [Source:RGD Symbol;Acc:620968]	5.33	17.7	1.73	0.0149	0.441547	yes	UP	N	N	N	Y	Y	5.76	16.45
TBIG028809	ENSRNOG00000019404.L02	Hhatl	hedgehog acyltransferase-like [Source:RGD Symbol;Acc:1311911]	31.9	138	2.12	0.01505	0.444782	yes	UP	N	N	N	Y	Y	34.47	128.59
TBIG005504	ENSRNOG00000014698	Chrnb1	cholinergic receptor, nicotinic, beta 1 (muscle) [Source:RGD Symbol;Acc:2349]	8.28	29	1.81	0.0151	0.445655	yes	UP	N	N	N	Y	Y	8.94	26.97
TBIG025124	ENSRNOG00000009012.L01	Asb2	ankyrin repeat and SOCS box-containing 2 [Source:RGD Symbol;Acc:1306414]	25.3	90.3	1.83	0.0152	0.44679	yes	UP	N	N	N	Y	Y	27.4	83.95
TBIG024713	ENSRNOG00000037435.L01	Tmem196	transmembrane protein 196 [Source:RGD Symbol;Acc:1562527]	1.57	8.87	2.5	0.01525	0.447655	yes	UP	N	N	N	Y	Y	1.69	8.27
TBIG020915	ENSRNOG00000005690	Lmcd1	LIM and cysteine-rich domains 1 [Source:RGD Symbol;Acc:1308963]	13.7	44.1	1.69	0.01555	0.453406	yes	UP	N	N	N	Y	Y	14.76	41
TBIG011521	ENSRNOG00000020602	Ndufa13	NADH dehydrogenase (ubiquinone) 1 alpha subcomplex, 13 [Source:RGD Symbol;Acc:1565358]	232	772	1.73	0.01585	0.459692	yes	UP	N	N	N	Y	Y	251.19	717.91
TBIG012285	ENSRNOG00000018651.L01	Agtpbp1	ATP/GTP binding protein 1 [Source:RGD Symbol;Acc:1306307]	6.6	23.2	1.81	0.0163	0.469617	yes	UP	N	N	N	Y	Y	7.13	21.55
TBIG001586	ENSRNOG00000020339.L01	Neurl1	neuralized E3 ubiquitin protein ligase 1 [Source:RGD Symbol;Acc:1307021]	3.58	12.6	1.81	0.01645	0.473312	yes	UP	N	N	N	Y	Y	3.87	11.67
TBIG029573	XLOC_029573	-	-	1.39	8.22	2.57	0.01655	0.473687	yes	UP	N	N	N	Y	Y	1.5	7.66
TBIG002137	ENSRNOG00000024309.L01	Cox6b1	cytochrome c oxidase subunit VIb polypeptide 1 [Source:RGD Symbol;Acc:1584097]	80.3	281	1.81	0.01665	0.475923	yes	UP	N	N	N	Y	Y	86.75	261.2
TBIG021848	ENSRNOG00000031249.L01	Slco1a2	solute carrier organic anion transporter family, member 1A2 [Source:RGD Symbol;Acc:70985]	5.06	19.7	1.96	0.0174	0.486508	yes	UP	N	N	N	Y	Y	5.47	18.34
TBIG002271	ENSRNOG00000021128.L01	Kcnj11	potassium inwardly rectifying channel, subfamily J, member 11 [Source:RGD Symbol;Acc:69247]	7.6	26.3	1.79	0.0177	0.493628	yes	UP	N	N	N	Y	Y	8.22	24.48
TBIG008042	ENSRNOG00000027489.L01	Mn1	meningioma 1 [Source:RGD Symbol;Acc:1565571]	4.64	14.2	1.61	0.01825	0.506374	yes	UP	N	N	N	Y	Y	5.02	13.2
TBIG002156	ENSRNOG00000021102.L01	Scn1b	sodium channel, voltage-gated, type I, beta subunit [Source:RGD Symbol;Acc:3631]	106	393	1.9	0.0188	0.514426	yes	UP	N	N	N	Y	Y	114.28	365.9
TBIG009508	ENSRNOG00000027791	Cox7a2	cytochrome c oxidase subunit VIIa polypeptide 2 [Source:RGD Symbol;Acc:68365]	106	337	1.67	0.0188	0.514426	yes	UP	N	N	N	Y	Y	114.49	313.47
TBIG012455	ENSRNOG00000018415	Acot13	acyl-CoA thioesterase 13 [Source:RGD Symbol;Acc:1306513]	32.3	109	1.75	0.019	0.518595	yes	UP	N	N	N	Y	Y	34.9	101.24
TBIG026720	ENSRNOG00000007896.L01	Klhl38	kelch-like family member 38 [Source:RGD Symbol;Acc:1564169]	4.03	15.2	1.92	0.01925	0.524105	yes	UP	N	N	N	Y	Y	4.36	14.17
TBIG005923	ENSRNOG00000012134.L01	Scn4a	sodium channel, voltage-gated, type IV, alpha subunit [Source:RGD Symbol;Acc:3636]	7.32	27.1	1.89	0.0193	0.524811	yes	UP	N	N	N	Y	Y	7.91	25.2
TBIG007848	ENSRNOG00000024616	Tsc22d4	TSC22 domain family, member 4 [Source:RGD Symbol;Acc:1584380]	16.6	51.7	1.64	0.0198	0.535067	yes	UP	N	N	N	Y	Y	17.93	48.11
TBIG020763	ENSRNOG00000008481.L01	Reep1	receptor accessory protein 1 [Source:RGD Symbol;Acc:1305230]	4.6	16.3	1.83	0.02	0.538467	yes	UP	N	N	N	Y	Y	4.97	15.2
TBIG017753	XLOC_017753	pol	Pol polyprotein [Source:SWISS;Acc:P11227]	0.35	5.45	3.96	0.0202	0.541176	yes	UP	N	N	N	Y	Y	0.38	5.07
TBIG002750	ENSRNOG00000015976	Snrpn	small nuclear ribonucleoprotein polypeptide N [Source:RGD Symbol;Acc:621306]	12.1	38.4	1.66	0.02025	0.541184	yes	UP	N	N	N	Y	Y	13.12	35.75
TBIG023053	ENSRNOG00000008236	Decr1	2,4-dienoyl CoA reductase 1, mitochondrial [Source:RGD Symbol;Acc:70999]	48.4	145	1.58	0.0204	0.543859	yes	UP	N	N	N	Y	Y	52.28	135.13
TBIG028086	ENSRNOG00000037199.L01	Spink8	serine peptidase inhibitor, Kazal type 8 [Source:RGD Symbol;Acc:1307150]	4.58	43.7	3.25	0.0204	0.543859	yes	UP	N	N	N	Y	Y	4.95	40.69
TBIG023461	ENSRNOG00000026646.L01	LOC100361505	rCG31129-like [Source:RGD Symbol;Acc:2319962]	56.9	190	1.74	0.02095	0.553085	yes	UP	N	N	N	Y	Y	61.53	176.75
TBIG002919	ENSRNOG00000020484.L01	Trpm5	transient receptor potential cation channel, subfamily M, member 5 [Source:RGD Symbol;Acc:1310620]	4.23	13.8	1.71	0.021	0.553085	yes	UP	N	N	N	Y	Y	4.57	12.86
TBIG023008	ENSRNOG00000007069.L01	Adhfe1	alcohol dehydrogenase, iron containing, 1 [Source:RGD Symbol;Acc:1308863]	12.2	43.1	1.82	0.021	0.553085	yes	UP	N	N	N	Y	Y	13.16	40.12
TBIG020454	XLOC_020454	Cd36	Platelet glycoprotein 4 [Source:SWISS;Acc:Q07969]	23.2	72.3	1.64	0.02105	0.553732	yes	UP	N	N	N	Y	Y	25.03	67.39
TBIG013308	ENSRNOG00000027230.L01	Fhod3	formin homology 2 domain containing 3 [Source:RGD Symbol;Acc:2322319]	2.66	9.68	1.86	0.0212	0.554972	yes	UP	N	N	N	Y	Y	2.87	9
TBIG026559	ENSRNOG00000004878	Myf6	myogenic factor 6 [Source:RGD Symbol;Acc:3134]	17.9	53.2	1.57	0.02155	0.56146	yes	UP	N	N	N	Y	Y	19.31	49.55
TBIG007634	XLOC_007634	-	-	0.736	4.9	2.73	0.02165	0.562719	yes	UP	N	N	N	Y	Y	0.8	4.56
TBIG000609	ENSRNOG00000020779.L01	Kcna7	potassium voltage-gated channel, shaker-related subfamily, member 7 [Source:RGD Symbol;Acc:1309632]	7.86	23.4	1.57	0.02185	0.56388	yes	UP	N	N	N	Y	Y	8.5	21.74
TBIG026294	ENSRNOG00000029571.L02	Coq10a	coenzyme Q10 homolog A (S. cerevisiae) [Source:RGD Symbol;Acc:1562447]	46.8	166	1.83	0.022	0.566409	yes	UP	N	N	N	Y	Y	50.62	154.86
TBIG018095	ENSRNOG00000046371.L01	AABR06022585.1	Uncharacterized protein [Source:UniProtKB/TrEMBL;Acc:M0R8G6]	0	9.97	inf	0.0222	0.57009	yes	UP	N	N	N	Y	Y	0	9.28
TBIG012857	ENSRNOG00000018989.L01	Epdr1	ependymin related 1 [Source:RGD Symbol;Acc:1359161]	8.99	30.9	1.78	0.02225	0.57009	yes	UP	N	N	N	Y	Y	9.7	28.81
TBIG029600	ENSRNOG00000019850.L01	Speg	SPEG complex locus [Source:RGD Symbol;Acc:2124]	8.31	25.7	1.63	0.0223	0.57009	yes	UP	N	N	N	Y	Y	8.98	23.9
TBIG014273	ENSRNOG00000014522.L01	Mlycd	malonyl-CoA decarboxylase [Source:RGD Symbol;Acc:620234]	20.2	60.9	1.59	0.0228	0.580065	yes	UP	N	N	N	Y	Y	21.87	56.6
TBIG005027	ENSRNOG00000021380.L01	Fads6	fatty acid desaturase 6 [Source:RGD Symbol;Acc:1311950]	2.46	11.3	2.2	0.0234	0.591957	yes	UP	N	N	N	Y	Y	2.66	10.54
TBIG011770	ENSRNOG00000049942.L01	RGD1564899	similar to chromosome 10 open reading frame 71 [Source:RGD Symbol;Acc:1564899]	7.07	22.5	1.67	0.02355	0.593684	yes	UP	N	N	N	Y	Y	7.64	20.94
TBIG010018	ENSRNOG00000004005.L01	Camk2b	calcium/calmodulin-dependent protein kinase II beta [Source:RGD Symbol;Acc:2262]	13.3	46.6	1.81	0.0237	0.595966	yes	UP	N	N	N	Y	Y	14.4	43.36
TBIG024919	ENSRNOG00000005053	Egln3	egl-9 family hypoxia-inducible factor 3 [Source:RGD Symbol;Acc:71019]	11.6	35	1.6	0.02375	0.595966	yes	UP	N	N	N	Y	Y	12.49	32.58
TBIG015798	ENSRNOG00000048862.L01	Mrps36	mitochondrial ribosomal protein S36 [Source:RGD Symbol;Acc:1309315]	54.7	165	1.6	0.0238	0.596534	yes	UP	N	N	N	Y	Y	59.03	154.17
TBIG021461	ENSRNOG00000012659	Vamp5	vesicle-associated membrane protein 5 [Source:RGD Symbol;Acc:620419]	31.8	99.4	1.64	0.0239	0.598352	yes	UP	N	N	N	Y	Y	34.38	92.42
TBIG017684	ENSRNOG00000047118.L01	LOC683897	similar to Protein C6orf203 [Source:RGD Symbol;Acc:1597785]	18.1	59.4	1.71	0.02405	0.601416	yes	UP	N	N	N	Y	Y	19.58	55.27
TBIG029516	ENSRNOG00000011825	LOC100361144	NADH dehydrogenase (ubiquinone) 1 beta subcomplex 3-like [Source:RGD Symbol;Acc:2320717]	169	572	1.76	0.02415	0.602533	yes	UP	N	N	N	Y	Y	182.8	531.87
TBIG006725	ENSRNOG00000002994.L01	Popdc2	popeye domain containing 2 [Source:RGD Symbol;Acc:735226]	3.04	11.1	1.87	0.0242	0.603089	yes	UP	N	N	N	Y	Y	3.29	10.32
TBIG017818	XLOC_017818	-	-	3.43	11.7	1.77	0.0243	0.60351	yes	UP	N	N	N	Y	Y	3.71	10.9
TBIG018835	ENSRNOG00000006420.L01	Rbm38	RNA binding motif protein 38 [Source:RGD Symbol;Acc:1308503]	23.5	74.3	1.66	0.0243	0.60351	yes	UP	N	N	N	Y	Y	25.45	69.09
TBIG023107	ENSRNOG00000009686.L01	Aqp7	aquaporin 7 [Source:RGD Symbol;Acc:2145]	0.976	9.14	3.23	0.0245	0.607093	yes	UP	N	N	N	Y	Y	1.05	8.51
TBIG012309	ENSRNOG00000013653.L01	Pdlim7	PDZ and LIM domain 7 [Source:RGD Symbol;Acc:628769]	52.3	240	2.2	0.02465	0.609423	yes	UP	N	N	N	Y	Y	56.54	222.65
TBIG029782	ENSRNOG00000048320	Ndufa11	NADH dehydrogenase (ubiquinone) 1 alpha subcomplex 11 [Source:RGD Symbol;Acc:1303292]	246	759	1.62	0.02475	0.609525	yes	UP	N	N	N	Y	Y	266.37	706.47
TBIG001852	ENSRNOG00000014224	LOC684509	similar to NADH-ubiquinone oxidoreductase B9 subunit (Complex I-B9) (CI-B9) [Source:RGD Symbol;Acc:1589176]	652	1880	1.53	0.02485	0.609525	yes	UP	N	N	N	Y	Y	704.7	1749.02
TBIG015572	ENSRNOG00000034161	LOC681754	similar to cytochrome c oxidase, subunit VIb polypeptide 1 [Source:RGD Symbol;Acc:1591649]	126	404	1.68	0.0249	0.610064	yes	UP	N	N	N	Y	Y	135.87	375.59
TBIG008032	ENSRNOG00000000701	Iscu	iron-sulfur cluster assembly enzyme [Source:RGD Symbol;Acc:1309562]	43.2	139	1.68	0.0251	0.613584	yes	UP	N	N	N	Y	Y	46.74	129.08
TBIG020876	ENSRNOG00000047023.L01	Aldh1l1	aldehyde dehydrogenase 1 family, member L1 [Source:RGD Symbol;Acc:621294]	5.16	17.4	1.75	0.02525	0.616559	yes	UP	N	N	N	Y	Y	5.58	16.19
TBIG016309	ENSRNOG00000050924.L01	Kcnc4	potassium voltage gated channel, Shaw-related subfamily, member 4 [Source:RGD Symbol;Acc:1589169]	3.61	13.9	1.94	0.02565	0.624925	yes	UP	N	N	N	Y	Y	3.9	12.9
TBIG019847	ENSRNOG00000012477.L01	Eef1a2	eukaryotic translation elongation factor 1 alpha 2 [Source:RGD Symbol;Acc:3781]	70.6	282	2	0.02575	0.625961	yes	UP	N	N	N	Y	Y	76.37	261.96
TBIG023098	ENSRNOG00000024539	Ndufb6	NADH dehydrogenase (ubiquinone) 1 beta subcomplex, 6 [Source:RGD Symbol;Acc:1311354]	94	259	1.46	0.02585	0.626992	yes	UP	N	N	N	Y	Y	101.64	240.51
TBIG007624	XLOC_007624	-	-	0.374	3.39	3.18	0.0262	0.630566	yes	UP	N	N	N	Y	Y	0.4	3.16
TBIG014122	ENSRNOG00000028717.L01	Ndufb7	NADH dehydrogenase (ubiquinone) 1 beta subcomplex, 7 [Source:RGD Symbol;Acc:1308550]	243	826	1.77	0.02625	0.631072	yes	UP	N	N	N	Y	Y	262.79	767.89
TBIG002200	XLOC_002200	Etfb	Electron transfer flavoprotein subunit beta [Source:SWISS;Acc:Q68FU3]	111	339	1.6	0.0264	0.633085	yes	UP	N	N	N	Y	Y	120.49	314.82
TBIG005072	ENSRNOG00000042653	LOC690871	hypothetical protein LOC690871 [Source:RGD Symbol;Acc:1590963]	87.9	259	1.56	0.0265	0.633391	yes	UP	N	N	N	Y	Y	95.11	240.7
TBIG000538	XLOC_000538	-	-	0.76	7.28	3.26	0.02655	0.633391	yes	UP	N	N	N	Y	Y	0.82	6.78
TBIG026959	ENSRNOG00000006653.L01	Slc38a4	solute carrier family 38, member 4 [Source:RGD Symbol;Acc:621836]	1.72	7.89	2.2	0.02675	0.637464	yes	UP	N	N	N	Y	Y	1.85	7.34
TBIG029436	ENSRNOG00000016660	Cox5b	cytochrome c oxidase subunit Vb [Source:RGD Symbol;Acc:620608]	553	1930	1.8	0.0268	0.637957	yes	UP	N	N	N	Y	Y	598.37	1792.71
TBIG027931	ENSRNOG00000006224	Klhl31	kelch-like family member 31 [Source:RGD Symbol;Acc:1560540]	11.5	34.5	1.59	0.027	0.639921	yes	UP	N	N	N	Y	Y	12.41	32.14
TBIG021236	ENSRNOG00000009565	Pdk4	pyruvate dehydrogenase kinase, isozyme 4 [Source:RGD Symbol;Acc:69061]	41.6	229	2.46	0.02735	0.641991	yes	UP	N	N	N	Y	Y	44.96	213.32
TBIG005755	ENSRNOG00000007235.L01	Atp5g1	ATP synthase, H+ transporting, mitochondrial Fo complex, subunit C1 (subunit 9) [Source:RGD Symbol;Acc:61933]	279	1010	1.85	0.02745	0.641991	yes	UP	N	N	N	Y	Y	301.72	937.95
TBIG010077	ENSRNOG00000042419	Acyp2	acylphosphatase 2, muscle type [Source:RGD Symbol;Acc:1595836]	51.2	146	1.51	0.0275	0.641991	yes	UP	N	N	N	Y	Y	55.25	136.05
TBIG007601	ENSRNOG00000037815.L01	Acad10	acyl-CoA dehydrogenase family, member 10 [Source:RGD Symbol;Acc:1310159]	8.05	23.6	1.55	0.0278	0.64395	yes	UP	N	N	N	Y	Y	8.7	21.96
TBIG015874	ENSRNOG00000009864.L01	Pla2g12a	phospholipase A2, group XIIA [Source:RGD Symbol;Acc:1304662]	26.9	78.5	1.54	0.0278	0.64395	yes	UP	N	N	N	Y	Y	29.09	72.97
TBIG022367	ENSRNOG00000009974.L01	Coq3	coenzyme Q3 methyltransferase [Source:RGD Symbol;Acc:2380]	21.8	64.3	1.56	0.028	0.646732	yes	UP	N	N	N	Y	Y	23.57	59.91
TBIG031129	ENSRNOG00000003452.L01	Asb11	ankyrin repeat and SOCS box-containing 11 [Source:RGD Symbol;Acc:1566298]	5	27.6	2.46	0.02835	0.650676	yes	UP	N	N	N	Y	Y	5.4	25.68
TBIG028960	XLOC_028960	-	-	50.2	148	1.55	0.02845	0.652284	yes	UP	N	N	N	Y	Y	54.29	137.36
TBIG019747	ENSRNOG00000027434	Fitm2	fat storage-inducing transmembrane protein 2 [Source:RGD Symbol;Acc:1307696]	9.77	28.3	1.54	0.02885	0.658681	yes	UP	N	N	N	Y	Y	10.56	26.39
TBIG022413	ENSRNOG00000000130.L01	Dnajb5	DnaJ (Hsp40) homolog, subfamily B, member 5 [Source:RGD Symbol;Acc:1307453]	11.7	34.1	1.55	0.02915	0.661371	yes	UP	N	N	N	Y	Y	12.61	31.7
TBIG027955	ENSRNOG00000009928.L01	Bckdhb	branched chain keto acid dehydrogenase E1, beta polypeptide [Source:RGD Symbol;Acc:2197]	32.8	99.2	1.6	0.0292	0.661816	yes	UP	N	N	N	Y	Y	35.47	92.36
TBIG028134	ENSRNOG00000032085.L01	Dlec1	deleted in lung and esophageal cancer 1 [Source:RGD Symbol;Acc:1561649]	2.19	11.7	2.42	0.02975	0.670792	yes	UP	N	N	N	Y	Y	2.37	10.88
TBIG020630	ENSRNOG00000016917.L01	Clcn1	chloride channel, voltage-sensitive 1 [Source:RGD Symbol;Acc:2360]	10.9	36.3	1.74	0.0301	0.67631	yes	UP	N	N	N	Y	Y	11.74	33.77
TBIG008395	ENSRNOG00000003973	Cyb5r1	cytochrome b5 reductase 1 [Source:RGD Symbol;Acc:1306084]	29.6	84.1	1.51	0.03015	0.67631	yes	UP	N	N	N	Y	Y	31.96	78.28
TBIG022275	ENSRNOG00000006110.L01	Jph1	junctophilin 1 [Source:RGD Symbol;Acc:1308789]	7.46	22	1.56	0.0303	0.678278	yes	UP	N	N	N	Y	Y	8.06	20.48
TBIG011063	ENSRNOG00000009063	Dnajc15	DnaJ (Hsp40) homolog, subfamily C, member 15 [Source:RGD Symbol;Acc:1307154]	35.5	102	1.52	0.03035	0.6787	yes	UP	N	N	N	Y	Y	38.34	94.72
TBIG014278	ENSRNOG00000015904.L01	Wfdc1	WAP four-disulfide core domain 1 [Source:RGD Symbol;Acc:68938]	3.42	15.7	2.2	0.03055	0.681491	yes	UP	N	N	N	Y	Y	3.69	14.64
TBIG002380	ENSRNOG00000019278.L01	Fsd2	fibronectin type III and SPRY domain containing 2 [Source:RGD Symbol;Acc:1305167]	6.73	23.6	1.81	0.0306	0.681491	yes	UP	N	N	N	Y	Y	7.27	22
TBIG002944	ENSRNOG00000017446	Ndufs8	NADH dehydrogenase (ubiquinone) Fe-S protein 8 [Source:RGD Symbol;Acc:1309436]	95.9	270	1.49	0.03065	0.681908	yes	UP	N	N	N	Y	Y	103.7	250.98
TBIG006624	ENSRNOG00000028238.L01	Sh3bgr	SH3 domain binding glutamate-rich protein [Source:RGD Symbol;Acc:1563599]	88.7	390	2.14	0.03105	0.690102	yes	UP	N	N	N	Y	Y	95.78	363.17
TBIG023381	ENSRNOG00000009741.L01	Cyp4b1	cytochrome P450, family 4, subfamily b, polypeptide 1 [Source:RGD Symbol;Acc:2480]	10	36.9	1.88	0.03125	0.692428	yes	UP	N	N	N	Y	Y	10.85	34.36
TBIG007671	ENSRNOG00000048430.L01	Myo18b	myosin XVIIIb [Source:RGD Symbol;Acc:1594542]	6.44	19.5	1.6	0.03135	0.69253	yes	UP	N	N	N	Y	Y	6.96	18.15
TBIG013534	ENSRNOG00000013766	Acaa2	acetyl-CoA acyltransferase 2 [Source:RGD Symbol;Acc:620482]	64.4	208	1.69	0.03135	0.69253	yes	UP	N	N	N	Y	Y	69.61	193
TBIG015548	ENSRNOG00000033162	Chia	chitinase, acidic [Source:RGD Symbol;Acc:1303058]	1.18	13.1	3.47	0.0314	0.692932	yes	UP	N	N	N	Y	Y	1.27	12.17
TBIG021277	ENSRNOG00000005698	Ndufa5	NADH dehydrogenase (ubiquinone) 1 alpha subcomplex 5 [Source:RGD Symbol;Acc:3155]	228	656	1.53	0.03175	0.697827	yes	UP	N	N	N	Y	Y	245.97	610.42
TBIG012348	ENSRNOG00000016684.L01	Wnk2	WNK lysine deficient protein kinase 2 [Source:RGD Symbol;Acc:1307284]	8.99	26.2	1.54	0.03185	0.698305	yes	UP	N	N	N	Y	Y	9.72	24.39
TBIG012851	ENSRNOG00000027571.L01	AABR06092040.2	Uncharacterized protein [Source:UniProtKB/TrEMBL;Acc:D3ZVA2]	1.86	8.54	2.2	0.03185	0.698305	yes	UP	N	N	N	Y	Y	2	7.96
TBIG007888	ENSRNOG00000046171.L01	Mlxipl	MLX interacting protein-like [Source:RGD Symbol;Acc:620400]	4.91	15.5	1.65	0.0319	0.698305	yes	UP	N	N	N	Y	Y	5.31	14.39
TBIG027776	ENSRNOG00000009888	Timm8b	translocase of inner mitochondrial membrane 8 homolog b (yeast) [Source:RGD Symbol;Acc:619840]	151	421	1.48	0.03205	0.700885	yes	UP	N	N	N	Y	Y	163.12	391.8
TBIG005079	ENSRNOG00000036695	Mrpl12	mitochondrial ribosomal protein L12 [Source:RGD Symbol;Acc:1588559]	60.3	169	1.48	0.0325	0.707175	yes	UP	N	N	N	Y	Y	65.22	156.63
TBIG000611	ENSRNOG00000020812	Gys1	glycogen synthase 1, muscle [Source:RGD Symbol;Acc:1589798]	23.5	67.6	1.52	0.03255	0.707556	yes	UP	N	N	N	Y	Y	25.44	62.92
TBIG024817	ENSRNOG00000024905.L01	Drc1	dynein regulatory complex subunit 1 [Source:RGD Symbol;Acc:1359318]	1.82	7.86	2.11	0.03265	0.708316	yes	UP	N	N	N	Y	Y	1.97	7.31
TBIG019050	ENSRNOG00000005668.L01	Ndufa8	NADH dehydrogenase (ubiquinone) 1 alpha subcomplex, 8 [Source:RGD Symbol;Acc:1306283]	102	290	1.5	0.03275	0.708747	yes	UP	N	N	N	Y	Y	110.66	269.26
TBIG003032	XLOC_003032	Dnajc4	DnaJ homolog subfamily C member 4 [Source:SWISS;Acc:Q9D844]	28.2	85.5	1.6	0.0328	0.708747	yes	UP	N	N	N	Y	Y	30.44	79.53
TBIG021446	ENSRNOG00000005615	Gadd45a	growth arrest and DNA-damage-inducible, alpha [Source:RGD Symbol;Acc:2654]	20.4	57.4	1.49	0.03295	0.710578	yes	UP	N	N	N	Y	Y	22.09	53.35
TBIG006735	ENSRNOG00000002459.L01	Fbxo40	F-box protein 40 [Source:RGD Symbol;Acc:1309781]	7.8	22.6	1.54	0.0331	0.712774	yes	UP	N	N	N	Y	Y	8.42	21.07
TBIG015511	ENSRNOG00000015347.L01	Trim45	tripartite motif-containing 45 [Source:RGD Symbol;Acc:1309168]	8.17	27.8	1.77	0.03315	0.712774	yes	UP	N	N	N	Y	Y	8.83	25.87
TBIG026776	ENSRNOG00000007668.L01	Mafa	v-maf avian musculoaponeurotic fibrosarcoma oncogene A [Source:RGD Symbol;Acc:1562627]	4.17	13.1	1.66	0.03315	0.712774	yes	UP	N	N	N	Y	Y	4.51	12.21
TBIG030037	ENSRNOG00000017248.L01	Prkag3	protein kinase, AMP-activated, gamma 3 non-catalytic subunit [Source:RGD Symbol;Acc:1308698]	4.04	13	1.69	0.03335	0.714957	yes	UP	N	N	N	Y	Y	4.36	12.09
TBIG013111	XLOC_013111	-	-	4.27	23.2	2.44	0.0335	0.716762	yes	UP	N	N	N	Y	Y	4.62	21.59
TBIG000627	ENSRNOG00000021096.L01	Tmem143	transmembrane protein 143 [Source:RGD Symbol;Acc:1305013]	7.02	21.7	1.63	0.03355	0.717127	yes	UP	N	N	N	Y	Y	7.59	20.16
TBIG020595	ENSRNOG00000026616	Ndufb2	NADH dehydrogenase (ubiquinone) 1 beta subcomplex, 2 [Source:RGD Symbol;Acc:1308130]	401	1250	1.64	0.03365	0.717856	yes	UP	N	N	N	Y	Y	433.57	1160.16
TBIG004752	ENSRNOG00000009466	Unc45b	unc-45 homolog B (C. elegans) [Source:RGD Symbol;Acc:1305666]	13.9	39.9	1.52	0.03385	0.720711	yes	UP	N	N	N	Y	Y	14.98	37.06
TBIG011791	ENSRNOG00000011912.L01	Tmem38a	transmembrane protein 38a [Source:RGD Symbol;Acc:1307901]	106	398	1.91	0.0339	0.72107	yes	UP	N	N	N	Y	Y	114.89	370.81
TBIG006724	ENSRNOG00000038951	Cox17	COX17 cytochrome c oxidase copper chaperone [Source:RGD Symbol;Acc:620548]	256	707	1.46	0.0343	0.725681	yes	UP	N	N	N	Y	Y	277.16	657.06
TBIG018146	ENSRNOG00000005369.L01	Kcnj3	potassium inwardly-rectifying channel, subfamily J, member 3 [Source:RGD Symbol;Acc:2958]	0.252	2.23	3.14	0.03435	0.725681	yes	UP	N	N	N	Y	Y	0.27	2.08
TBIG000532	ENSRNOG00000032204	Uqcrb	ubiquinol-cytochrome c reductase binding protein [Source:RGD Symbol;Acc:1311971]	42.5	133	1.65	0.0346	0.727435	yes	UP	N	N	N	Y	Y	45.92	124.11
TBIG015628	ENSRNOG00000010681.L01	Pitx2	paired-like homeodomain 2 [Source:RGD Symbol;Acc:3331]	7.13	24.7	1.8	0.0346	0.727435	yes	UP	N	N	N	Y	Y	7.71	23.01
TBIG005743	ENSRNOG00000004172.L01	Pdk2	pyruvate dehydrogenase kinase, isozyme 2 [Source:RGD Symbol;Acc:69428]	43.7	125	1.51	0.03465	0.727784	yes	UP	N	N	N	Y	Y	47.21	116
TBIG001209	ENSRNOG00000018736	Pnpla2	patatin-like phospholipase domain containing 2 [Source:RGD Symbol;Acc:1309044]	16.1	44.9	1.48	0.0349	0.73092	yes	UP	N	N	N	Y	Y	17.45	41.77
TBIG005097	ENSRNOG00000036659.L01	Fn3k	fructosamine 3 kinase [Source:RGD Symbol;Acc:1559983]	7.73	27.9	1.85	0.03515	0.733335	yes	UP	N	N	N	Y	Y	8.36	25.98
TBIG005216	ENSRNOG00000014568	Ndufb10	NADH dehydrogenase (ubiquinone) 1 beta subcomplex, 10 [Source:RGD Symbol;Acc:1310782]	205	630	1.62	0.0354	0.735031	yes	UP	N	N	N	Y	Y	221.91	585.41
TBIG007560	ENSRNOG00000028756	Ubc	ubiquitin C [Source:RGD Symbol;Acc:621244]	29	82.9	1.51	0.0354	0.735031	yes	UP	N	N	N	Y	Y	31.36	77.09
TBIG007565	ENSRNOG00000001055.L01	Rilpl1	Rab interacting lysosomal protein-like 1 [Source:RGD Symbol;Acc:1307973]	37.2	151	2.02	0.03565	0.738813	yes	UP	N	N	N	Y	Y	40.16	140.39
TBIG000854	ENSRNOG00000020251.L01	Art1	ADP-ribosyltransferase 1 [Source:RGD Symbol;Acc:1304591]	67.7	239	1.82	0.0358	0.740513	yes	UP	N	N	N	Y	Y	73.18	222.69
TBIG019011	ENSRNOG00000023352.L01	Fam78a	family with sequence similarity 78, member A [Source:RGD Symbol;Acc:1566351]	1.45	5.46	1.92	0.0358	0.740513	yes	UP	N	N	N	Y	Y	1.56	5.08
TBIG020546	ENSRNOG00000007900	Tspan33	tetraspanin 33 [Source:RGD Symbol;Acc:1560915]	0.47	4.11	3.13	0.03605	0.744976	yes	UP	N	N	N	Y	Y	0.51	3.82
TBIG011385	XLOC_011385	Dnah12	Dynein heavy chain 12, axonemal [Source:SWISS;Acc:Q923J6]	3.14	11.9	1.92	0.03635	0.749044	yes	UP	N	N	N	Y	Y	3.4	11.07
TBIG003811	XLOC_003811	-	-	0	6.18	inf	0.03645	0.749686	yes	UP	N	N	N	Y	Y	0	5.76
TBIG012755	ENSRNOG00000033307	AABR06091093.1	Triosephosphate isomerase [Source:UniProtKB/TrEMBL;Acc:M0R4U4]	9.6	38	1.98	0.03665	0.752379	yes	UP	N	N	N	Y	Y	10.37	35.31
TBIG016443	ENSRNOG00000012512.L01	Nexn	nexilin (F actin binding protein) [Source:RGD Symbol;Acc:708354]	29	86.4	1.57	0.03675	0.752936	yes	UP	N	N	N	Y	Y	31.33	80.33
TBIG003256	ENSRNOG00000025781.L01	Sec31b	SEC31 homolog B (S. cerevisiae) [Source:RGD Symbol;Acc:1598329]	3.52	11.5	1.71	0.03685	0.752936	yes	UP	N	N	N	Y	Y	3.8	10.69
TBIG015189	ENSRNOG00000011949.L01	Ndufb5	NADH dehydrogenase (ubiquinone) 1 beta subcomplex, 5 [Source:RGD Symbol;Acc:1305909]	89.7	254	1.5	0.03685	0.752936	yes	UP	N	N	N	Y	Y	96.85	236.78
TBIG023115	ENSRNOG00000013320.L01	RGD1561916	similar to testes development-related NYD-SP22 isoform 1 [Source:RGD Symbol;Acc:1561916]	2.04	9.85	2.27	0.0369	0.753251	yes	UP	N	N	N	Y	Y	2.21	9.17
TBIG021051	ENSRNOG00000024508.L01	LOC690326	hypothetical protein LOC690326 [Source:RGD Symbol;Acc:1597362]	0	0.809	inf	0.0374	0.762029	yes	UP	N	N	N	Y	Y	0	0.75
TBIG000723	ENSRNOG00000011659.L01	Alpk3	alpha-kinase 3 [Source:RGD Symbol;Acc:1309860]	14.9	48.6	1.7	0.03765	0.765691	yes	UP	N	N	N	Y	Y	16.14	45.2
TBIG013347	ENSRNOG00000018775.L01	Cystm1	cysteine-rich transmembrane module containing 1 [Source:RGD Symbol;Acc:2323233]	51.5	148	1.52	0.03785	0.767608	yes	UP	N	N	N	Y	Y	55.65	137.3
TBIG024674	ENSRNOG00000046763.L01	Adssl1	adenylosuccinate synthase like 1 [Source:RGD Symbol;Acc:1590342]	109	407	1.89	0.0379	0.767907	yes	UP	N	N	N	Y	Y	118.31	378.29
TBIG017167	ENSRNOG00000001182.L01	Ndufv3	NADH dehydrogenase (ubiquinone) flavoprotein 3 [Source:RGD Symbol;Acc:621020]	33	121	1.87	0.03795	0.768205	yes	UP	N	N	N	Y	Y	35.62	112.16
TBIG029912	ENSRNOG00000016151.L01	Ankrd23	ankyrin repeat domain 23 [Source:RGD Symbol;Acc:1310398]	58.9	194	1.72	0.0381	0.769811	yes	UP	N	N	N	Y	Y	63.7	180.38
TBIG019211	ENSRNOG00000007765.L01	Frzb	frizzled-related protein [Source:RGD Symbol;Acc:1311315]	9.3	25.3	1.45	0.0386	0.776313	yes	UP	N	N	N	Y	Y	10.05	23.57
TBIG005076	ENSRNOG00000046076	Tspan10	tetraspanin 10 [Source:RGD Symbol;Acc:1590062]	0	0.6	inf	0.03895	0.778321	yes	UP	N	N	N	Y	Y	0	0.56
TBIG026881	ENSRNOG00000008569	Ndufa6	NADH dehydrogenase (ubiquinone) 1 alpha subcomplex, 6 (B14) [Source:RGD Symbol;Acc:1309818]	204	537	1.4	0.039	0.778606	yes	UP	N	N	N	Y	Y	220.06	499.5
TBIG006898	XLOC_006898	-	-	0.193	1.6	3.05	0.0391	0.779028	yes	UP	N	N	N	Y	Y	0.21	1.49
TBIG012355	ENSRNOG00000046547.L01	Rbm24	RNA binding motif protein 24 [Source:RGD Symbol;Acc:1584029]	16.7	43.9	1.39	0.0392	0.779028	yes	UP	N	N	N	Y	Y	18.09	40.96
TBIG003289	ENSRNOG00000036585.L01	Cfap43	cilia and flagella associated protein 43 [Source:RGD Symbol;Acc:1560545]	2.5	9.62	1.95	0.0397	0.785496	yes	UP	N	N	N	Y	Y	2.7	8.96
TBIG016606	XLOC_016606	-	-	1.52	7.43	2.29	0.03975	0.785496	yes	UP	N	N	N	Y	Y	1.65	6.91
TBIG024478	ENSRNOG00000007031.L01	Trim9	tripartite motif-containing 9 [Source:RGD Symbol;Acc:621540]	0.359	2.89	3.01	0.0399	0.78577	yes	UP	N	N	N	Y	Y	0.39	2.69
TBIG011465	ENSRNOG00000011438.L01	Sftpa1	surfactant protein A1 [Source:RGD Symbol;Acc:3665]	1.55	7.54	2.29	0.03995	0.786044	yes	UP	N	N	N	Y	Y	1.67	7.02
TBIG017217	ENSRNOG00000000610.L01	Cisd1	CDGSH iron sulfur domain 1 [Source:RGD Symbol;Acc:1309529]	92.8	272	1.55	0.04	0.786318	yes	UP	N	N	N	Y	Y	100.35	253.25
TBIG003154	ENSRNOG00000015011.L01	Fam189a2	family with sequence similarity 189, member A2 [Source:RGD Symbol;Acc:1307524]	10.4	30.9	1.57	0.04025	0.790519	yes	UP	N	N	N	Y	Y	11.26	28.71
TBIG012619	ENSRNOG00000017637.L01	Fbp2	fructose-1,6-bisphosphatase 2 [Source:RGD Symbol;Acc:620930]	10.7	34.8	1.7	0.0403	0.790707	yes	UP	N	N	N	Y	Y	11.53	32.35
TBIG014267	ENSRNOG00000013676.L01	Plcg2	phospholipase C, gamma 2 [Source:RGD Symbol;Acc:3348]	3.3	9.44	1.52	0.0404	0.790707	yes	UP	N	N	N	Y	Y	3.57	8.78
TBIG028287	XLOC_028287	Znf653	Zinc finger protein 653 [Source:SWISS;Acc:Q6YND2]	42.2	117	1.47	0.0404	0.790707	yes	UP	N	N	N	Y	Y	45.65	109.16
TBIG005515	ENSRNOG00000017226	Slc2a4	solute carrier family 2 (facilitated glucose transporter), member 4 [Source:RGD Symbol;Acc:2711]	47.6	145	1.6	0.04045	0.790707	yes	UP	N	N	N	Y	Y	51.47	134.57
TBIG011005	ENSRNOG00000010798.L01	Blk	BLK proto-oncogene, Src family tyrosine kinase [Source:RGD Symbol;Acc:1308859]	0.335	2.8	3.07	0.04045	0.790707	yes	UP	N	N	N	Y	Y	0.36	2.61
TBIG018716	ENSRNOG00000019823	LOC100910944	reactive oxygen species modulator 1-like [Source:RGD Symbol;Acc:6496011]	112	294	1.39	0.04055	0.790707	yes	UP	N	N	N	Y	Y	121.57	273.69
TBIG005406	ENSRNOG00000002873.L01	Fam183b	family with sequence similarity 183, member B [Source:RGD Symbol;Acc:1561932]	3.95	27.6	2.8	0.04065	0.79124	yes	UP	N	N	N	Y	Y	4.27	25.69
TBIG010686	ENSRNOG00000038074	LOC498555	similar to 60S acidic ribosomal protein P2 [Source:RGD Symbol;Acc:1590791]	107	286	1.42	0.04065	0.79124	yes	UP	N	N	N	Y	Y	115.75	265.68
TBIG012931	ENSRNOG00000018044.L01	Phyh	phytanoyl-CoA 2-hydroxylase [Source:RGD Symbol;Acc:620317]	129	425	1.72	0.04075	0.791771	yes	UP	N	N	N	Y	Y	139.5	395.43
TBIG008041	XLOC_008041	-	-	1.94	8.57	2.14	0.0408	0.792036	yes	UP	N	N	N	Y	Y	2.09	7.97
TBIG007506	ENSRNOG00000001425.L01	Sh2b2	SH2B adaptor protein 2 [Source:RGD Symbol;Acc:69284]	1.48	7.07	2.25	0.0409	0.792474	yes	UP	N	N	N	Y	Y	1.61	6.58
TBIG006861	ENSRNOG00000001873.L01	P2rx6	purinergic receptor P2X, ligand-gated ion channel, 6 [Source:RGD Symbol;Acc:3243]	5.91	19.3	1.71	0.04095	0.792474	yes	UP	N	N	N	Y	Y	6.39	17.94
TBIG031208	ENSRNOG00000004197.L01	Asb12	ankyrin repeat and SOCS box-containing 12 [Source:RGD Symbol;Acc:1561142]	9.82	32.7	1.74	0.041	0.792474	yes	UP	N	N	N	Y	Y	10.61	30.45
TBIG031152	ENSRNOG00000004322.L01	Sh3kbp1	SH3-domain kinase binding protein 1 [Source:RGD Symbol;Acc:620904]	13.8	40.4	1.56	0.04105	0.792474	yes	UP	N	N	N	Y	Y	14.86	37.68
TBIG016075	ENSRNOG00000012478.L01	Shox2	short stature homeobox 2 [Source:RGD Symbol;Acc:3674]	6.45	18.6	1.53	0.0411	0.792474	yes	UP	N	N	N	Y	Y	6.97	17.32
TBIG030769	ENSRNOG00000046918	Apoo	apolipoprotein O [Source:RGD Symbol;Acc:1565289]	17.6	49.4	1.49	0.0411	0.792474	yes	UP	N	N	N	Y	Y	19.01	45.99
TBIG010513	XLOC_010513	TRDC	T-cell receptor delta chain C region [Source:SWISS;Acc:B7Z8K6]	1.77	18	3.35	0.04115	0.792474	yes	UP	N	N	N	Y	Y	1.91	16.74
TBIG013559	XLOC_013559	-	-	0.8	4.32	2.43	0.04115	0.792474	yes	UP	N	N	N	Y	Y	0.86	4.03
TBIG028619	ENSRNOG00000042903	Cox7a2	cytochrome c oxidase subunit VIIa polypeptide 2 [Source:RGD Symbol;Acc:68365]	341	963	1.5	0.0413	0.793959	yes	UP	N	N	N	Y	Y	368.47	895.97
TBIG022465	ENSRNOG00000008027.L01	Murc	muscle-related coiled-coil protein [Source:RGD Symbol;Acc:1310395]	14.6	38.6	1.4	0.0414	0.794479	yes	UP	N	N	N	Y	Y	15.75	35.92
TBIG020427	ENSRNOG00000024885.L01	Asb10	ankyrin repeat and SOCS box-containing 10 [Source:RGD Symbol;Acc:1562922]	5.28	19.6	1.89	0.04165	0.79787	yes	UP	N	N	N	Y	Y	5.71	18.22
TBIG018540	ENSRNOG00000015847	LOC680233	hypothetical protein LOC680233 [Source:RGD Symbol;Acc:1594198]	234	618	1.4	0.04195	0.802206	yes	UP	N	N	N	Y	Y	252.78	574.67
TBIG006976	ENSRNOG00000001959.L01	Mx1	myxovirus (influenza virus) resistance 1 [Source:RGD Symbol;Acc:3127]	6.14	17.4	1.5	0.04235	0.808436	yes	UP	N	N	N	Y	Y	6.63	16.17
TBIG031111	ENSRNOG00000000165.L01	Pfkfb1	6-phosphofructo-2-kinase/fructose-2,6-biphosphatase 1 [Source:RGD Symbol;Acc:3307]	7.41	28.5	1.94	0.04265	0.810147	yes	UP	N	N	N	Y	Y	8	26.52
TBIG025748	ENSRNOG00000016952.L01	LOC686442	similar to ubiquinol-cytochrome c reductase subunit [Source:RGD Symbol;Acc:1597642]	319	1010	1.65	0.0427	0.810147	yes	UP	N	N	N	Y	Y	345.46	935.46
TBIG028340	ENSRNOG00000028856.L01	Pknox2	PBX/knotted 1 homeobox 2 [Source:RGD Symbol;Acc:1590611]	3.24	9.77	1.59	0.0427	0.810147	yes	UP	N	N	N	Y	Y	3.49	9.09
TBIG007767	ENSRNOG00000001036.L01	Rsph10b	radial spoke head 10 homolog B (Chlamydomonas) [Source:RGD Symbol;Acc:1311893]	1.83	7.05	1.94	0.043	0.813712	yes	UP	N	N	N	Y	Y	1.98	6.56
TBIG010827	XLOC_010827	KLHL33	Kelch-like protein 33 [Source:SWISS;Acc:A6NCF5]	19.8	71.9	1.86	0.04315	0.813961	yes	UP	N	N	N	Y	Y	21.4	66.92
TBIG030602	ENSRNOG00000008329	Ndufb11	NADH dehydrogenase (ubiquinone) 1 beta subcomplex, 11 [Source:RGD Symbol;Acc:1563698]	166	497	1.58	0.04315	0.813961	yes	UP	N	N	N	Y	Y	179.62	462.6
TBIG001035	ENSRNOG00000025110.L01	Vwa3a	von Willebrand factor A domain containing 3A [Source:RGD Symbol;Acc:1311670]	2.39	8.1	1.76	0.0432	0.813961	yes	UP	N	N	N	Y	Y	2.59	7.54
TBIG021588	ENSRNOG00000032443.L01	Lmod3	leiomodin 3 (fetal) [Source:RGD Symbol;Acc:1564924]	32.4	88.9	1.46	0.04335	0.816082	yes	UP	N	N	N	Y	Y	34.97	82.71
TBIG001107	ENSRNOG00000022099	Trim72	tripartite motif-containing 72 [Source:RGD Symbol;Acc:1562778]	37	104	1.49	0.0437	0.820543	yes	UP	N	N	N	Y	Y	39.97	96.63
TBIG025003	XLOC_025003	Sptb	Spectrin beta chain, erythrocytic [Source:SWISS;Acc:P15508]	6.06	25.3	2.06	0.0438	0.820991	yes	UP	N	N	N	Y	Y	6.55	23.52
TBIG007118	ENSRNOG00000001827.L02	Masp1	mannan-binding lectin serine peptidase 1 [Source:RGD Symbol;Acc:620213]	19.3	57.4	1.57	0.04385	0.820991	yes	UP	N	N	N	Y	Y	20.84	53.42
TBIG022609	ENSRNOG00000029333.L01	Echdc2	enoyl CoA hydratase domain containing 2 [Source:RGD Symbol;Acc:1308525]	8.52	25.2	1.56	0.0439	0.820991	yes	UP	N	N	N	Y	Y	9.21	23.43
TBIG015452	ENSRNOG00000021101.L01	Sema6c	sema domain, transmembrane domain (TM), and cytoplasmic domain, (semaphorin) 6C [Source:RGD Symbol;Acc:3659]	8.68	25	1.53	0.04405	0.822153	yes	UP	N	N	N	Y	Y	9.39	23.27
TBIG006618	XLOC_006618	-	-	2.05	7.22	1.82	0.0441	0.822382	yes	UP	N	N	N	Y	Y	2.22	6.72
TBIG016322	ENSRNOG00000029726	Gstm1	glutathione S-transferase mu 1 [Source:RGD Symbol;Acc:2755]	21.6	58	1.42	0.0443	0.824699	yes	UP	N	N	N	Y	Y	23.34	53.95
TBIG022872	ENSRNOG00000007967	Sdhb	succinate dehydrogenase complex, subunit B, iron sulfur (Ip) [Source:RGD Symbol;Acc:1308598]	201	625	1.63	0.04475	0.829973	yes	UP	N	N	N	Y	Y	217.54	580.89
TBIG028026	ENSRNOG00000048915	Twf2	twinfilin actin-binding protein 2 [Source:RGD Symbol;Acc:1591460]	32.7	86.1	1.4	0.04475	0.829973	yes	UP	N	N	N	Y	Y	35.4	80.06
TBIG006674	ENSRNOG00000039649	Lnp1	leukemia NUP98 fusion partner 1 [Source:RGD Symbol;Acc:2323126]	0	0.592	inf	0.0448	0.829973	yes	UP	N	N	N	Y	Y	0	0.55
TBIG000648	ENSRNOG00000015972.L01	Ano5	anoctamin 5 [Source:RGD Symbol;Acc:1564265]	3.72	10	1.43	0.04485	0.829973	yes	UP	N	N	N	Y	Y	4.02	9.35
TBIG030105	ENSRNOG00000019557.L01	Asb18	ankyrin repeat and SOCS box-containing 18 [Source:RGD Symbol;Acc:1310850]	2.93	11.4	1.96	0.04485	0.829973	yes	UP	N	N	N	Y	Y	3.17	10.62
TBIG020916	ENSRNOG00000005798	Cav3	caveolin 3 [Source:RGD Symbol;Acc:2281]	24.6	65.3	1.41	0.0451	0.833183	yes	UP	N	N	N	Y	Y	26.53	60.78
TBIG011907	ENSRNOG00000012658.L01	Pdlim3	PDZ and LIM domain 3 [Source:RGD Symbol;Acc:620427]	88.8	284	1.68	0.04525	0.835246	yes	UP	N	N	N	Y	Y	95.93	264.37
TBIG020448	ENSRNOG00000012932.L01	Ccdc146	coiled-coil domain containing 146 [Source:RGD Symbol;Acc:1559535]	1.31	5.62	2.1	0.0454	0.837305	yes	UP	N	N	N	Y	Y	1.41	5.22
TBIG029464	ENSRNOG00000028945	Tmem182	transmembrane protein 182 [Source:RGD Symbol;Acc:1563696]	21.9	56.2	1.36	0.04545	0.837518	yes	UP	N	N	N	Y	Y	23.64	52.35
TBIG008495	ENSRNOG00000002860	Ccdc181	coiled-coil domain containing 181 [Source:RGD Symbol;Acc:1309708]	17.3	45.8	1.4	0.0455	0.837731	yes	UP	N	N	N	Y	Y	18.69	42.55
TBIG030165	ENSRNOG00000042503	Ndufv2	NADH dehydrogenase (ubiquinone) flavoprotein 2 [Source:RGD Symbol;Acc:621733]	201	635	1.66	0.04555	0.837943	yes	UP	N	N	N	Y	Y	217.33	590.7
TBIG021464	ENSRNOG00000013605.L01	Sh2d6	SH2 domain containing 6 [Source:RGD Symbol;Acc:1587427]	17.1	48.7	1.5	0.04565	0.839074	yes	UP	N	N	N	Y	Y	18.54	45.28
TBIG007043	ENSRNOG00000002976.L01	Maats1	MYCBP-associated, testis expressed 1 [Source:RGD Symbol;Acc:1305539]	0.662	3.12	2.24	0.04575	0.839495	yes	UP	N	N	N	Y	Y	0.71	2.91
TBIG025725	ENSRNOG00000020464	Mrpl54	mitochondrial ribosomal protein L54 [Source:RGD Symbol;Acc:1305694]	84.7	223	1.4	0.04615	0.8447	yes	UP	N	N	N	Y	Y	91.56	207.25
TBIG018258	ENSRNOG00000008243.L01	Slc43a1	solute carrier family 43 (amino acid system L transporter), member 1 [Source:RGD Symbol;Acc:1308229]	2.19	8.26	1.91	0.04645	0.848255	yes	UP	N	N	N	Y	Y	2.37	7.68
TBIG026315	ENSRNOG00000007784	Bloc1s1	biogenesis of lysosomal organelles complex-1, subunit 1 [Source:RGD Symbol;Acc:1307564]	69.9	182	1.38	0.0465	0.848255	yes	UP	N	N	N	Y	Y	75.62	169.24
TBIG004256	ENSRNOG00000005269.L01	Srl	sarcalumenin [Source:RGD Symbol;Acc:1306564]	39.5	130	1.72	0.04675	0.848646	yes	UP	N	N	N	Y	Y	42.64	120.99
TBIG002846	ENSRNOG00000005953.L01	Cfap46	cilia and flagella associated protein 46 [Source:RGD Symbol;Acc:1559985]	0.88	4.13	2.23	0.0469	0.848646	yes	UP	N	N	N	Y	Y	0.95	3.84
TBIG005242	ENSRNOG00000020029.L01	Fam195a	family with sequence similarity 195, member A [Source:RGD Symbol;Acc:1592603]	12	43.2	1.85	0.04695	0.848646	yes	UP	N	N	N	Y	Y	12.98	40.16
TBIG011742	ENSRNOG00000026914.L01	Dnah1	dynein, axonemal, heavy chain 1 [Source:RGD Symbol;Acc:621795]	1.42	4.84	1.77	0.04695	0.848646	yes	UP	N	N	N	Y	Y	1.53	4.5
TBIG002106	ENSRNOG00000020495.L01	Eif3k	eukaryotic translation initiation factor 3, subunit K [Source:RGD Symbol;Acc:1309221]	68.1	264	1.96	0.047	0.848845	yes	UP	N	N	N	Y	Y	73.55	245.93
TBIG002424	ENSRNOG00000019303.L01	Srpk3	SRSF protein kinase 3 [Source:RGD Symbol;Acc:727856]	15.5	41.2	1.41	0.04715	0.849194	yes	UP	N	N	N	Y	Y	16.8	38.34
TBIG022922	XLOC_022922	-	-	1.2	3.88	1.7	0.0472	0.849194	yes	UP	N	N	N	Y	Y	1.29	3.61
TBIG009967	ENSRNOG00000022419.L01	Dok7	docking protein 7 [Source:RGD Symbol;Acc:1566416]	3.98	12	1.59	0.04725	0.849194	yes	UP	N	N	N	Y	Y	4.31	11.15
TBIG013611	XLOC_013611	-	-	1.31	6.65	2.34	0.0473	0.849194	yes	UP	N	N	N	Y	Y	1.42	6.2
TBIG018903	ENSRNOG00000010451	Slc34a3	solute carrier family 34 (type II sodium/phosphate contransporter), member 3 [Source:RGD Symbol;Acc:708551]	0.418	3.12	2.9	0.04745	0.849194	yes	UP	N	N	N	Y	Y	0.45	2.91
TBIG008770	ENSRNOG00000007040	Timm17a	translocase of inner mitochondrial membrane 17 homolog A (yeast) [Source:RGD Symbol;Acc:3862]	69.8	179	1.36	0.0475	0.849194	yes	UP	N	N	N	Y	Y	75.36	166.22
TBIG008369	ENSRNOG00000042320	Slc41a1	solute carrier family 41 (magnesium transporter), member 1 [Source:RGD Symbol;Acc:1311397]	13.1	33.2	1.34	0.04785	0.849194	yes	UP	N	N	N	Y	Y	14.17	30.91
TBIG011515	ENSRNOG00000020345.L01	Slc25a42	solute carrier family 25, member 42 [Source:RGD Symbol;Acc:1592346]	13.8	34.5	1.33	0.048	0.849194	yes	UP	N	N	N	Y	Y	14.88	32.11
TBIG020968	ENSRNOG00000023465.L01	LOC500300	similar to hypothetical protein MGC6835 [Source:RGD Symbol;Acc:1565700]	9.88	33.3	1.75	0.0481	0.849194	yes	UP	N	N	N	Y	Y	10.67	30.99
TBIG011665	ENSRNOG00000048769.L01	Nek5	NIMA-related kinase 5 [Source:RGD Symbol;Acc:1593817]	1.75	6.36	1.86	0.04835	0.850366	yes	UP	N	N	N	Y	Y	1.89	5.92
TBIG015292	ENSRNOG00000012827.L01	Mlf1	myeloid leukemia factor 1 [Source:RGD Symbol;Acc:1306854]	66.1	180	1.44	0.04835	0.850366	yes	UP	N	N	N	Y	Y	71.37	167.49
TBIG025822	ENSRNOG00000006939	Ndufa7	NADH dehydrogenase (ubiquinone) 1 alpha subcomplex, 7 [Source:RGD Symbol;Acc:1304597]	134	348	1.38	0.0484	0.850366	yes	UP	N	N	N	Y	Y	144.48	323.16
TBIG017048	ENSRNOG00000000804	Mrps18b	mitochondrial ribosomal protein S18B [Source:RGD Symbol;Acc:1302998]	35.7	94.5	1.4	0.0485	0.850366	yes	UP	N	N	N	Y	Y	38.57	87.89
TBIG030739	ENSRNOG00000032487.L01	Sts	steroid sulfatase (microsomal), isozyme S [Source:RGD Symbol;Acc:3783]	2.49	8.91	1.84	0.04865	0.850366	yes	UP	N	N	N	Y	Y	2.7	8.28
TBIG005517	ENSRNOG00000018114.L01	Acadvl	acyl-CoA dehydrogenase, very long chain [Source:RGD Symbol;Acc:2014]	78.3	239	1.61	0.0487	0.850366	yes	UP	N	N	N	Y	Y	84.59	222.04
TBIG022962	ENSRNOG00000016618.L01	Tmem52	transmembrane protein 52 [Source:RGD Symbol;Acc:2318502]	25.3	104	2.03	0.0487	0.850366	yes	UP	N	N	N	Y	Y	27.35	96.31
TBIG026050	ENSRNOG00000007475.L01	Gpihbp1	glycosylphosphatidylinositol anchored high density lipoprotein binding protein 1 [Source:RGD Symbol;Acc:1564237]	2.52	14.1	2.48	0.0489	0.850366	yes	UP	N	N	N	Y	Y	2.72	13.1
TBIG010345	ENSRNOG00000040122	Myoz1	myozenin 1 [Source:RGD Symbol;Acc:1561064]	201	833	2.05	0.04895	0.850366	yes	UP	N	N	N	Y	Y	217.44	774.58
TBIG026628	ENSRNOG00000029465.L01	Slc26a10	solute carrier family 26, member 10 [Source:RGD Symbol;Acc:1564851]	10.7	28.7	1.43	0.0491	0.850366	yes	UP	N	N	N	Y	Y	11.52	26.69
TBIG025009	ENSRNOG00000010646.L01	Tmem229b	transmembrane protein 229B [Source:RGD Symbol;Acc:1562622]	8.85	23	1.38	0.0492	0.850366	yes	UP	N	N	N	Y	Y	9.57	21.4
TBIG021618	ENSRNOG00000030269.L01	Atp2b2	ATPase, Ca++ transporting, plasma membrane 2 [Source:RGD Symbol;Acc:2176]	0.293	1.38	2.24	0.04955	0.850366	yes	UP	N	N	N	Y	Y	0.32	1.29
TBIG012330	ENSRNOG00000011684	Auh	AU RNA binding protein/enoyl-CoA hydratase [Source:RGD Symbol;Acc:1306087]	27.3	70.1	1.36	0.0496	0.850366	yes	UP	N	N	N	Y	Y	29.51	65.18
TBIG018930	ENSRNOG00000017983.L01	Ubac1	UBA domain containing 1 [Source:RGD Symbol;Acc:1359542]	28.8	72.8	1.34	0.04965	0.850366	yes	UP	N	N	N	Y	Y	31.12	67.67
TBIG030648	ENSRNOG00000010092.L01	Magix	MAGI family member, X-linked [Source:RGD Symbol;Acc:1549729]	2.99	9.36	1.65	0.04965	0.850366	yes	UP	N	N	N	Y	Y	3.23	8.7
TBIG007273	XLOC_007273	-	-	0	0.698	inf	0.0497	0.850366	yes	UP	N	N	N	Y	Y	0	0.65
TBIG007278	XLOC_007278	-	-	0	1.2	inf	0.0497	0.850366	yes	UP	N	N	N	Y	Y	0	1.12
TBIG008230	XLOC_008230	-	-	0	0.574	inf	0.0497	0.850366	yes	UP	N	N	N	Y	Y	0	0.53
TBIG012052	XLOC_012052	-	-	0	82.5	inf	0.0497	0.850366	yes	UP	N	N	N	Y	Y	0	76.82
TBIG011867	XLOC_011867	DDX60	Probable ATP-dependent RNA helicase DDX60 [Source:SWISS;Acc:Q8IY21]	0	2.16	inf	0.0497	0.850366	yes	UP	N	N	N	Y	Y	0	2.01
TBIG014560	ENSRNOG00000012428.L01	Maf	v-maf avian musculoaponeurotic fibrosarcoma oncogene homolog [Source:RGD Symbol;Acc:3034]	5	13.7	1.46	0.0497	0.850366	yes	UP	N	N	N	Y	Y	5.41	12.77
TBIG016970	XLOC_016970	-	-	0	14	inf	0.0497	0.850366	yes	UP	N	N	N	Y	Y	0	13.05
TBIG018100	XLOC_018100	KV5A6_MOUSE	Ig kappa chain V-V region L6 [Source:SWISS;Acc:P01638]	0	3.41	inf	0.0497	0.850366	yes	UP	N	N	N	Y	Y	0	3.17
TBIG020251	XLOC_020251	-	-	0	0.595	inf	0.0497	0.850366	yes	UP	N	N	N	Y	Y	0	0.55
TBIG027170	XLOC_027170	-	-	0	6.85	inf	0.0497	0.850366	yes	UP	N	N	N	Y	Y	0	6.37
TBIG027260	XLOC_027260	-	-	0	0.567	inf	0.0497	0.850366	yes	UP	N	N	N	Y	Y	0	0.53
TBIG027031	ENSRNOG00000036825	Spt1	salivary protein 1 [Source:RGD Symbol;Acc:3754]	0	1.89	inf	0.0497	0.850366	yes	UP	N	N	N	Y	Y	0	1.76
TBIG030401	XLOC_030401	-	-	0	0.956	inf	0.0497	0.850366	yes	UP	N	N	N	Y	Y	0	0.89
TBIG031114	ENSRNOG00000043358	LOC685699	hypothetical protein LOC685699 [Source:RGD Symbol;Acc:1591314]	0	1.02	inf	0.0497	0.850366	yes	UP	N	N	N	Y	Y	0	0.95
TBIG024559	ENSRNOG00000011112.L01	Fam161b	family with sequence similarity 161, member B [Source:RGD Symbol;Acc:1309058]	1.81	7.01	1.96	0.04975	0.850553	yes	UP	N	N	N	Y	Y	1.95	6.52

## Sheet: DEG2 Y1-4 vs O5-8
GeneId	GeneAcc	GeneName	Desc	Value_1	Value_2	log2fc	p-value	q-value	DEG:PV=0.05:SELECT	DEG:UP_DOWN	DEG:QV<=0.05	DEG:QV<=0.10	DEG:PV<=0.01	DEG:PV<=0.05	DEG:FC2>=0	EXP:Y1-4:FPKM	EXP:O5-8:FPKM
TBIG000447	ENSRNOG00000026244.L01	Nccrp1	non-specific cytotoxic cell receptor protein 1 homolog (zebrafish) [Source:RGD Symbol;Acc:1305932]	65.1	4.76	-3.77	5e-05	0.0277683	yes	DOWN	Y	Y	Y	Y	Y	65.43	4.74
TBIG000698	ENSRNOG00000028992.L01	Acan	aggrecan [Source:RGD Symbol;Acc:68358]	11.1	0.649	-4.1	5e-05	0.0277683	yes	DOWN	Y	Y	Y	Y	Y	11.2	0.65
TBIG004085	XLOC_004085	-	-	0.931	0	#NAME?	5e-05	0.0277683	yes	DOWN	Y	Y	Y	Y	Y	0.94	0
TBIG005793	ENSRNOG00000032404.L01	Top2a	topoisomerase (DNA) II alpha [Source:RGD Symbol;Acc:62048]	13.6	2.21	-2.62	5e-05	0.0277683	yes	DOWN	Y	Y	Y	Y	Y	13.69	2.2
TBIG005835	ENSRNOG00000026371	Krt17	keratin 17 [Source:RGD Symbol;Acc:1303181]	256	36.4	-2.81	5e-05	0.0277683	yes	DOWN	Y	Y	Y	Y	Y	257.21	36.24
TBIG006667	ENSRNOG00000039668.L01	Col8a1	collagen, type VIII, alpha 1 [Source:RGD Symbol;Acc:1309361]	35.8	4.83	-2.89	5e-05	0.0277683	yes	DOWN	Y	Y	Y	Y	Y	36.02	4.81
TBIG008321	ENSRNOG00000002640.L01	Serpinb5	serpin peptidase inhibitor, clade B (ovalbumin), member 5 [Source:RGD Symbol;Acc:69342]	72.5	17.1	-2.08	5e-05	0.0277683	yes	DOWN	Y	Y	Y	Y	Y	72.83	17.02
TBIG008326	ENSRNOG00000002460.L01	Serpinb2	serpin peptidase inhibitor, clade B (ovalbumin), member 2 [Source:RGD Symbol;Acc:621823]	73.8	10.9	-2.76	5e-05	0.0277683	yes	DOWN	Y	Y	Y	Y	Y	74.13	10.86
TBIG008327	ENSRNOG00000002417.L01	Serpinb10	serpin peptidase inhibitor, clade B (ovalbumin), member 10 [Source:RGD Symbol;Acc:628853]	95.6	18.8	-2.35	5e-05	0.0277683	yes	DOWN	Y	Y	Y	Y	Y	96.08	18.67
TBIG009019	ENSRNOG00000003745.L01	Atf3	activating transcription factor 3 [Source:RGD Symbol;Acc:2165]	47.6	10.1	-2.24	5e-05	0.0277683	yes	DOWN	Y	Y	Y	Y	Y	47.84	10.07
TBIG009434	ENSRNOG00000007183	LOC100360977	TRIMCyp-like [Source:RGD Symbol;Acc:2321083]	158	21	-2.91	5e-05	0.0277683	yes	DOWN	Y	Y	Y	Y	Y	159.13	20.93
TBIG009441	ENSRNOG00000002006	Tmprss11d	transmembrane protease, serine 11d [Source:RGD Symbol;Acc:620654]	3.11	0	#NAME?	5e-05	0.0277683	yes	DOWN	Y	Y	Y	Y	Y	3.13	0
TBIG009896	ENSRNOG00000048890	LOC257642	rRNA promoter binding protein [Source:RGD Symbol;Acc:727924]	1690	161	-3.4	5e-05	0.0277683	yes	DOWN	Y	Y	Y	Y	Y	1701.42	159.88
TBIG011778	ENSRNOG00000043342	LOC290595	hypothetical gene supported by AF152002 [Source:RGD Symbol;Acc:1566160]	181	25.7	-2.82	5e-05	0.0277683	yes	DOWN	Y	Y	Y	Y	Y	182.1	25.6
TBIG013600	ENSRNOG00000017159.L01	Dsc3	desmocollin 3 [Source:RGD Symbol;Acc:1311782]	28.1	4.81	-2.55	5e-05	0.0277683	yes	DOWN	Y	Y	Y	Y	Y	28.21	4.79
TBIG013287	ENSRNOG00000016853.L01	Dsg1	desmoglein 1 [Source:RGD Symbol;Acc:1309925]	26.9	0.887	-4.92	5e-05	0.0277683	yes	DOWN	Y	Y	Y	Y	Y	27.08	0.88
TBIG013613	ENSRNOG00000016632.L01	Dsg3	desmoglein 3 [Source:RGD Symbol;Acc:1592103]	67.4	13.7	-2.29	5e-05	0.0277683	yes	DOWN	Y	Y	Y	Y	Y	67.7	13.69
TBIG015429	XLOC_015429	Sprr1a	Cornifin-A [Source:SWISS;Acc:Q63532]	203	6.35	-5	5e-05	0.0277683	yes	DOWN	Y	Y	Y	Y	Y	204.41	6.32
TBIG018551	ENSRNOG00000004575.L01	Il1a	interleukin 1 alpha [Source:RGD Symbol;Acc:2890]	1.86	0	#NAME?	5e-05	0.0277683	yes	DOWN	Y	Y	Y	Y	Y	1.86	0
TBIG023580	ENSRNOG00000029427.L01	Grhl3	grainyhead-like 3 (Drosophila) [Source:RGD Symbol;Acc:1308320]	27.3	4.51	-2.6	5e-05	0.0277683	yes	DOWN	Y	Y	Y	Y	Y	27.42	4.49
TBIG025936	ENSRNOG00000004476.L01	Wif1	Wnt inhibitory factor 1 [Source:RGD Symbol;Acc:619774]	129	6.42	-4.33	5e-05	0.0277683	yes	DOWN	Y	Y	Y	Y	Y	129.81	6.39
TBIG000385	ENSRNOG00000019999.L01	Lypd3	Ly6/Plaur domain containing 3 [Source:RGD Symbol;Acc:69053]	150	37	-2.02	0.0001	0.0495	yes	DOWN	Y	Y	Y	Y	Y	150.38	36.81
TBIG000470	ENSRNOG00000020380.L01	Lgals7	lectin, galactoside-binding, soluble, 7 [Source:RGD Symbol;Acc:61951]	633	117	-2.44	0.0001	0.0495	yes	DOWN	Y	Y	Y	Y	Y	635.49	115.93
TBIG009439	ENSRNOG00000029964.L01	Tmprss11g	transmembrane protease, serine 11G [Source:RGD Symbol;Acc:1306446]	67.8	17.4	-1.97	0.0001	0.0495	yes	DOWN	Y	Y	Y	Y	Y	68.17	17.28
TBIG016424	ENSRNOG00000036877.L01	Clca4l	chloride channel calcium activated 4-like [Source:RGD Symbol;Acc:1591945]	30.8	1.78	-4.11	0.0001	0.0495	yes	DOWN	Y	Y	Y	Y	Y	30.98	1.77
TBIG018854	ENSRNOG00000009531.L01	Col9a3	collagen, type IX, alpha 3 [Source:RGD Symbol;Acc:1310255]	26.1	3.71	-2.82	0.0001	0.0495	yes	DOWN	Y	Y	Y	Y	Y	26.26	3.69
TBIG004075	XLOC_004075	env	Envelope glycoprotein [Source:SWISS;Acc:P31789]	2.81	0	#NAME?	0.00015	0.0644434	yes	DOWN	N	Y	Y	Y	Y	2.82	0
TBIG012912	ENSRNOG00000028576.L01	Calml5	calmodulin-like 5 [Source:RGD Symbol;Acc:1310047]	313	46.3	-2.76	0.00015	0.0644434	yes	DOWN	N	Y	Y	Y	Y	314.38	46.05
TBIG017420	ENSRNOG00000030676.L01	RGD1562885	similar to RIKEN cDNA 2300002M23 [Source:RGD Symbol;Acc:1562885]	57.5	8.42	-2.77	0.00015	0.0644434	yes	DOWN	N	Y	Y	Y	Y	57.81	8.38
TBIG026996	ENSRNOG00000009160	LOC683295	similar to keratin complex 2, basic, gene 6a [Source:RGD Symbol;Acc:1589189]	49.1	2.39	-4.36	0.00015	0.0644434	yes	DOWN	N	Y	Y	Y	Y	49.32	2.37
TBIG031263	ENSRNOG00000004795.L01	Pof1b	premature ovarian failure 1B [Source:RGD Symbol;Acc:1560798]	51.7	13.6	-1.93	0.00015	0.0644434	yes	DOWN	N	Y	Y	Y	Y	51.94	13.53
TBIG014258	ENSRNOG00000012238.L01	Clec3a	C-type lectin domain family 3, member A [Source:RGD Symbol;Acc:1306295]	36.2	2.31	-3.97	0.0002	0.0759	yes	DOWN	N	Y	Y	Y	Y	36.39	2.3
TBIG015437	ENSRNOG00000043445.L01	Them5	thioesterase superfamily member 5 [Source:RGD Symbol;Acc:1562059]	108	13.5	-3	0.0002	0.0759	yes	DOWN	N	Y	Y	Y	Y	108.22	13.39
TBIG017520	ENSRNOG00000001162	Tff2	trefoil factor 2 [Source:RGD Symbol;Acc:620709]	193	37.3	-2.37	0.0002	0.0759	yes	DOWN	N	Y	Y	Y	Y	193.65	37.12
TBIG026977	ENSRNOG00000022282	Col2a1	collagen, type II, alpha 1 [Source:RGD Symbol;Acc:2375]	11.9	0.425	-4.81	0.0002	0.0759	yes	DOWN	N	Y	Y	Y	Y	11.95	0.42
TBIG026986	ENSRNOG00000025994.L01	Krt80	keratin 80 [Source:RGD Symbol;Acc:1359177]	113	25.6	-2.14	0.0002	0.0759	yes	DOWN	N	Y	Y	Y	Y	113.47	25.44
TBIG029379	ENSRNOG00000012535	Gpr115	G protein-coupled receptor 115 [Source:RGD Symbol;Acc:1565216]	15.6	1.26	-3.63	0.0002	0.0759	yes	DOWN	N	Y	Y	Y	Y	15.73	1.26
TBIG003494	XLOC_003494	Krt6a	Keratin, type II cytoskeletal 6A [Source:SWISS;Acc:Q4FZU2]	193	9.87	-4.29	0.00025	0.0837132	yes	DOWN	N	Y	Y	Y	Y	193.88	9.82
TBIG002838	ENSRNOG00000028137.L01	Mki67	marker of proliferation Ki-67 [Source:RGD Symbol;Acc:1305476]	6.88	1.47	-2.23	0.00025	0.0837132	yes	DOWN	N	Y	Y	Y	Y	6.92	1.46
TBIG022510	ENSRNOG00000007657.L01	Col27a1	collagen, type XXVII, alpha 1 [Source:RGD Symbol;Acc:735115]	20.3	4.66	-2.12	0.00025	0.0837132	yes	DOWN	N	Y	Y	Y	Y	20.44	4.64
TBIG002930	XLOC_002930	-	-	0.995	0	#NAME?	0.0003	0.09108	yes	DOWN	N	Y	Y	Y	Y	1	0
TBIG007015	XLOC_007015	MYH15	Myosin-15 [Source:SWISS;Acc:Q9Y2K3]	8.68	0	#NAME?	0.0003	0.09108	yes	DOWN	N	Y	Y	Y	Y	8.72	0
TBIG007311	XLOC_007311	-	-	1.08	0	#NAME?	0.0003	0.09108	yes	DOWN	N	Y	Y	Y	Y	1.09	0
TBIG007820	XLOC_007820	Cyp3a9	Cytochrome P450 3A9 [Source:SWISS;Acc:P51538]	65.6	14.4	-2.19	0.0003	0.09108	yes	DOWN	N	Y	Y	Y	Y	65.92	14.35
TBIG024024	XLOC_024024	-	-	5.94	0	#NAME?	0.0003	0.09108	yes	DOWN	N	Y	Y	Y	Y	5.97	0
TBIG009454	ENSRNOG00000024689.L01	Hopx	HOP homeobox [Source:RGD Symbol;Acc:621841]	396	101	-1.98	0.00035	0.102173	yes	DOWN	N	N	Y	Y	Y	397.75	100.17
TBIG019233	ENSRNOG00000009399.L01	RGD1311224	similar to fatty acid desaturase 2; linoleoyl-CoA desaturase (delta-6-desaturase)-like 2; delta-6 fatty acid desaturase [Source:RGD Symbol;Acc:1311224]	36.2	5.84	-2.63	0.00035	0.102173	yes	DOWN	N	N	Y	Y	Y	36.4	5.82
TBIG001400	ENSRNOG00000012067	Fam111a	family with sequence similarity 111, member A [Source:RGD Symbol;Acc:1560913]	43.3	10.3	-2.07	0.0004	0.10445	yes	DOWN	N	N	Y	Y	Y	43.51	10.25
TBIG015583	ENSRNOG00000023148.L01	Col11a1	collagen, type XI, alpha 1 [Source:RGD Symbol;Acc:2372]	3.65	0.207	-4.14	0.0004	0.10445	yes	DOWN	N	N	Y	Y	Y	3.67	0.21
TBIG003419	XLOC_003419	-	-	1.92	0	#NAME?	0.00045	0.10445	yes	DOWN	N	N	Y	Y	Y	1.93	0
TBIG003756	XLOC_003756	-	-	1.1	0	#NAME?	0.00045	0.10445	yes	DOWN	N	N	Y	Y	Y	1.1	0
TBIG007310	XLOC_007310	-	-	1.75	0	#NAME?	0.00045	0.10445	yes	DOWN	N	N	Y	Y	Y	1.76	0
TBIG009198	XLOC_009198	-	-	1.84	0	#NAME?	0.00045	0.10445	yes	DOWN	N	N	Y	Y	Y	1.85	0
TBIG015929	ENSRNOG00000049075	Fabp5	fatty acid binding protein 5, epidermal [Source:RGD Symbol;Acc:70997]	287	72.8	-1.98	0.00045	0.10445	yes	DOWN	N	N	Y	Y	Y	288.05	72.44
TBIG027007	ENSRNOG00000024909	Krt78	keratin 78 [Source:RGD Symbol;Acc:1591341]	24.2	5.46	-2.15	0.00045	0.10445	yes	DOWN	N	N	Y	Y	Y	24.33	5.43
TBIG027724	ENSRNOG00000021771.L01	Trim29	tripartite motif-containing 29 [Source:RGD Symbol;Acc:1307858]	97.9	26.5	-1.89	0.00045	0.10445	yes	DOWN	N	N	Y	Y	Y	98.34	26.37
TBIG008389	ENSRNOG00000003183	Fmod	fibromodulin [Source:RGD Symbol;Acc:619769]	25.6	3.53	-2.86	0.0005	0.10445	yes	DOWN	N	N	Y	Y	Y	25.71	3.51
TBIG005828	ENSRNOG00000014070.L01	Krt13	keratin 13 [Source:RGD Symbol;Acc:1302937]	962	154	-2.64	0.00055	0.109296	yes	DOWN	N	N	Y	Y	Y	965.93	153.1
TBIG013601	ENSRNOG00000039969.L01	Dsc2	desmocollin 2 [Source:RGD Symbol;Acc:1309426]	87.6	26.4	-1.73	0.00055	0.109296	yes	DOWN	N	N	Y	Y	Y	88.04	26.24
TBIG028291	ENSRNOG00000014343.L01	Anln	anillin, actin binding protein [Source:RGD Symbol;Acc:1561367]	12	1.98	-2.6	0.00055	0.109296	yes	DOWN	N	N	Y	Y	Y	12.07	1.97
TBIG011205	XLOC_011205	-	-	1.8	0	#NAME?	0.0006	0.109296	yes	DOWN	N	N	Y	Y	Y	1.81	0
TBIG025510	XLOC_025510	-	-	0.769	0	#NAME?	0.0006	0.109296	yes	DOWN	N	N	Y	Y	Y	0.77	0
TBIG028693	XLOC_028693	-	-	24.3	0	#NAME?	0.0006	0.109296	yes	DOWN	N	N	Y	Y	Y	24.44	0
TBIG030695	ENSRNOG00000004275.L01	Egfl6	EGF-like-domain, multiple 6 [Source:RGD Symbol;Acc:1563321]	42.9	12.1	-1.82	0.00065	0.114733	yes	DOWN	N	N	Y	Y	Y	43.09	12.08
TBIG014939	ENSRNOG00000032002.L01	Hapln1	hyaluronan and proteoglycan link protein 1 [Source:RGD Symbol;Acc:2412]	9.37	1.29	-2.86	0.0007	0.12144	yes	DOWN	N	N	Y	Y	Y	9.42	1.28
TBIG028117	ENSRNOG00000026951.L01	Susd5	sushi domain containing 5 [Source:RGD Symbol;Acc:1561132]	11	1.15	-3.26	0.0007	0.12144	yes	DOWN	N	N	Y	Y	Y	11	1.14
TBIG003418	XLOC_003418	-	-	0.764	0	#NAME?	0.00075	0.12144	yes	DOWN	N	N	Y	Y	Y	0.77	0
TBIG013779	ENSRNOG00000012176.L01	Rab27b	RAB27B, member RAS oncogene family [Source:RGD Symbol;Acc:620114]	19.4	5.69	-1.77	0.00075	0.12144	yes	DOWN	N	N	Y	Y	Y	19.5	5.66
TBIG023853	XLOC_023853	-	-	0.882	0	#NAME?	0.00075	0.12144	yes	DOWN	N	N	Y	Y	Y	0.89	0
TBIG007325	XLOC_007325	-	-	0.746	0	#NAME?	0.0008	0.12144	yes	DOWN	N	N	Y	Y	Y	0.75	0
TBIG008255	XLOC_008255	-	-	1.6	0	#NAME?	0.0008	0.12144	yes	DOWN	N	N	Y	Y	Y	1.61	0
TBIG010268	XLOC_010268	-	-	1.94	0	#NAME?	0.0008	0.12144	yes	DOWN	N	N	Y	Y	Y	1.95	0
TBIG014048	XLOC_014048	-	-	0.973	0	#NAME?	0.0008	0.12144	yes	DOWN	N	N	Y	Y	Y	0.98	0
TBIG016567	XLOC_016567	-	-	4.65	0	#NAME?	0.0008	0.12144	yes	DOWN	N	N	Y	Y	Y	4.67	0
TBIG016594	XLOC_016594	LIN1_NYCCO	LINE-1 reverse transcriptase homolog [Source:SWISS;Acc:P08548]	1.02	0	#NAME?	0.0008	0.12144	yes	DOWN	N	N	Y	Y	Y	1.02	0
TBIG027471	XLOC_027471	-	-	1.42	0	#NAME?	0.0008	0.12144	yes	DOWN	N	N	Y	Y	Y	1.43	0
TBIG031547	XLOC_031547	-	-	1.09	0	#NAME?	0.0008	0.12144	yes	DOWN	N	N	Y	Y	Y	1.09	0
TBIG031616	XLOC_031616	-	-	1	0	#NAME?	0.0008	0.12144	yes	DOWN	N	N	Y	Y	Y	1.01	0
TBIG014881	XLOC_014881	-	-	63.1	13.3	-2.25	0.00085	0.127332	yes	DOWN	N	N	Y	Y	Y	63.36	13.22
TBIG000560	ENSRNOG00000022353.L01	Klk13	kallikrein related-peptidase 13 [Source:RGD Symbol;Acc:1309337]	22.8	0.744	-4.94	0.00095	0.136047	yes	DOWN	N	N	Y	Y	Y	22.92	0.74
TBIG001711	ENSRNOG00000015321	Moxd1	monooxygenase, DBH-like 1 [Source:RGD Symbol;Acc:1310033]	10.7	1.18	-3.18	0.001	0.139693	yes	DOWN	N	N	Y	Y	Y	10.74	1.17
TBIG016224	ENSRNOG00000021134.L01	Anxa9	annexin A9 [Source:RGD Symbol;Acc:1587550]	27	4.69	-2.53	0.001	0.139693	yes	DOWN	N	N	Y	Y	Y	27.14	4.66
TBIG029378	ENSRNOG00000025603.L01	Gpr111	G protein-coupled receptor 111 [Source:RGD Symbol;Acc:1306718]	5.71	0.496	-3.52	0.001	0.139693	yes	DOWN	N	N	Y	Y	Y	5.74	0.49
TBIG028602	ENSRNOG00000011925.L01	Fam83b	family with sequence similarity 83, member B [Source:RGD Symbol;Acc:1311988]	9.37	2.19	-2.1	0.00105	0.1449	yes	DOWN	N	N	Y	Y	Y	9.42	2.18
TBIG027942	ENSRNOG00000025332.L01	Cd109	CD109 molecule [Source:RGD Symbol;Acc:1311287]	12.6	2.17	-2.53	0.00105	0.1449	yes	DOWN	N	N	Y	Y	Y	12.62	2.16
TBIG027749	ENSRNOG00000016397.L01	Tmprss13	transmembrane protease, serine 13 [Source:RGD Symbol;Acc:1310872]	20.4	5.26	-1.95	0.00125	0.170434	yes	DOWN	N	N	Y	Y	Y	20.49	5.24
TBIG015663	ENSRNOG00000032959	Adh7	alcohol dehydrogenase 7 (class IV), mu or sigma polypeptide [Source:RGD Symbol;Acc:621638]	198	54.9	-1.85	0.0013	0.176196	yes	DOWN	N	N	Y	Y	Y	198.77	54.68
TBIG000718	ENSRNOG00000013057.L01	Prc1	protein regulator of cytokinesis 1 [Source:RGD Symbol;Acc:1311754]	16.8	3.16	-2.41	0.00135	0.181891	yes	DOWN	N	N	Y	Y	Y	16.84	3.14
TBIG004824	ENSRNOG00000003304	Chad	chondroadherin [Source:RGD Symbol;Acc:2336]	149	14.8	-3.33	0.0014	0.185486	yes	DOWN	N	N	Y	Y	Y	149.76	14.7
TBIG022233	XLOC_022233	-	-	2.04	0	#NAME?	0.0014	0.185486	yes	DOWN	N	N	Y	Y	Y	2.05	0
TBIG003510	XLOC_003510	-	-	2.29	0	#NAME?	0.00145	0.185486	yes	DOWN	N	N	Y	Y	Y	2.3	0
TBIG006244	XLOC_006244	-	-	1.76	0	#NAME?	0.00145	0.185486	yes	DOWN	N	N	Y	Y	Y	1.77	0
TBIG010431	ENSRNOG00000008892.L01	Parp2	poly (ADP-ribose) polymerase 2 [Source:RGD Symbol;Acc:1310568]	72.8	20.5	-1.83	0.00145	0.185486	yes	DOWN	N	N	Y	Y	Y	73.2	20.36
TBIG011207	XLOC_011207	pol	Pol polyprotein [Source:SWISS;Acc:P31623]	1.31	0	#NAME?	0.00145	0.185486	yes	DOWN	N	N	Y	Y	Y	1.31	0
TBIG015414	ENSRNOG00000009574	Crct1	cysteine-rich C-terminal 1 [Source:RGD Symbol;Acc:1588886]	1.41	0	#NAME?	0.00145	0.185486	yes	DOWN	N	N	Y	Y	Y	1.42	0
TBIG028868	XLOC_028868	-	-	1.86	0	#NAME?	0.00145	0.185486	yes	DOWN	N	N	Y	Y	Y	1.86	0
TBIG011073	ENSRNOG00000012821.L01	Lect1	leukocyte cell derived chemotaxin 1 [Source:RGD Symbol;Acc:620176]	22.8	1.14	-4.33	0.0016	0.203531	yes	DOWN	N	N	Y	Y	Y	22.88	1.13
TBIG006794	ENSRNOG00000001923.L01	Tprg1	tumor protein p63 regulated 1 [Source:RGD Symbol;Acc:1306226]	12.8	0.638	-4.32	0.00165	0.208725	yes	DOWN	N	N	Y	Y	Y	12.83	0.64
TBIG002997	ENSRNOG00000020669.L02	Ovol1	ovo-like zinc finger 1 [Source:RGD Symbol;Acc:1306956]	37.6	7.8	-2.27	0.0019	0.239022	yes	DOWN	N	N	Y	Y	Y	37.82	7.77
TBIG001406	ENSRNOG00000048953.L01	Spink5	serine peptidase inhibitor, Kazal type 5 [Source:RGD Symbol;Acc:1306540]	5.77	0.598	-3.27	0.00195	0.243964	yes	DOWN	N	N	Y	Y	Y	5.79	0.6
TBIG000741	ENSRNOG00000017140.L01	Zfp185	zinc finger protein 185 [Source:RGD Symbol;Acc:1586351]	28.5	9.65	-1.56	0.00205	0.253688	yes	DOWN	N	N	Y	Y	Y	28.66	9.6
TBIG027995	ENSRNOG00000013932.L01	Rbp2	retinol binding protein 2, cellular [Source:RGD Symbol;Acc:3544]	36	2.41	-3.9	0.00205	0.253688	yes	DOWN	N	N	Y	Y	Y	36.21	2.39
TBIG015331	ENSRNOG00000010866.L01	Tmem154	transmembrane protein 154 [Source:RGD Symbol;Acc:1563262]	28.8	7.82	-1.88	0.00215	0.263653	yes	DOWN	N	N	Y	Y	Y	28.92	7.79
TBIG004296	ENSRNOG00000005336	Prss27	protease, serine 27 [Source:RGD Symbol;Acc:1303256]	35.5	7.08	-2.33	0.0022	0.263653	yes	DOWN	N	N	Y	Y	Y	35.62	7.04
TBIG005807	ENSRNOG00000011907.L01	Krt23	keratin 23 (histone deacetylase inducible) [Source:RGD Symbol;Acc:1308838]	114	28.9	-1.99	0.0022	0.263653	yes	DOWN	N	N	Y	Y	Y	114.96	28.74
TBIG012930	ENSRNOG00000017987	Ucma	upper zone of growth plate and cartilage matrix associated [Source:RGD Symbol;Acc:1308977]	28.3	1.35	-4.39	0.0022	0.263653	yes	DOWN	N	N	Y	Y	Y	28.42	1.34
TBIG014265	ENSRNOG00000012671.L01	Gan	gigaxonin [Source:RGD Symbol;Acc:1307766]	7.99	2.66	-1.59	0.00225	0.266836	yes	DOWN	N	N	Y	Y	Y	8.03	2.65
TBIG024842	ENSRNOG00000005345	Vsnl1	visinin-like 1 [Source:RGD Symbol;Acc:3966]	25	5.02	-2.32	0.00225	0.266836	yes	DOWN	N	N	Y	Y	Y	25.13	5
TBIG003493	XLOC_003493	Krt6a	Keratin, type II cytoskeletal 6A [Source:SWISS;Acc:Q4FZU2]	795	26.9	-4.89	0.00235	0.277251	yes	DOWN	N	N	Y	Y	Y	798.69	26.76
TBIG001015	ENSRNOG00000018459.L01	Xylt1	xylosyltransferase 1 [Source:RGD Symbol;Acc:620093]	4.81	1.22	-1.97	0.0025	0.291776	yes	DOWN	N	N	Y	Y	Y	4.83	1.22
TBIG004479	ENSRNOG00000026844.L01	Lypd8	LY6/PLAUR domain containing 8 [Source:RGD Symbol;Acc:1586251]	37.7	1.65	-4.51	0.00255	0.291776	yes	DOWN	N	N	Y	Y	Y	37.86	1.65
TBIG015080	ENSRNOG00000019184.L01	Npr3	natriuretic peptide receptor 3 [Source:RGD Symbol;Acc:3196]	13.7	3.69	-1.9	0.00255	0.291776	yes	DOWN	N	N	Y	Y	Y	13.81	3.67
TBIG023546	XLOC_023546	Zdhhc18	Palmitoyltransferase ZDHHC18 [Source:SWISS;Acc:Q5Y5T2]	327	75.2	-2.12	0.00255	0.291776	yes	DOWN	N	N	Y	Y	Y	328.05	74.83
TBIG016194	ENSRNOG00000009602.L01	AABR06019032.1	Uncharacterized protein [Source:UniProtKB/TrEMBL;Acc:E9PTQ1]	16.3	0.95	-4.1	0.00275	0.308461	yes	DOWN	N	N	Y	Y	Y	16.38	0.95
TBIG018514	ENSRNOG00000050251	MGC105649	hypothetical LOC302884 [Source:RGD Symbol;Acc:1359583]	75.9	22.4	-1.76	0.0028	0.311005	yes	DOWN	N	N	Y	Y	Y	76.25	22.28
TBIG021326	ENSRNOG00000013729.L01	RGD1306271	similar to KIAA1549 protein [Source:RGD Symbol;Acc:1306271]	6.42	0.718	-3.16	0.0028	0.311005	yes	DOWN	N	N	Y	Y	Y	6.45	0.71
TBIG008424	ENSRNOG00000012318.L01	Aspm	asp (abnormal spindle) homolog, microcephaly associated (Drosophila) [Source:RGD Symbol;Acc:1307111]	5.21	1.28	-2.03	0.00285	0.3135	yes	DOWN	N	N	Y	Y	Y	5.24	1.27
TBIG031430	ENSRNOG00000022684	Gpc3	glypican 3 [Source:RGD Symbol;Acc:2725]	99.3	33.8	-1.55	0.00285	0.3135	yes	DOWN	N	N	Y	Y	Y	99.79	33.64
TBIG024381	ENSRNOG00000023316.L01	Grhl1	grainyhead-like 1 (Drosophila) [Source:RGD Symbol;Acc:1305735]	37.6	12	-1.65	0.00295	0.32294	yes	DOWN	N	N	Y	Y	Y	37.75	11.91
TBIG010698	ENSRNOG00000024237.L01	Scel	sciellin [Source:RGD Symbol;Acc:1305102]	71.2	25.1	-1.5	0.00305	0.332289	yes	DOWN	N	N	Y	Y	Y	71.52	24.97
TBIG019393	ENSRNOG00000022710.L01	Prrg4	proline rich Gla (G-carboxyglutamic acid) 4 (transmembrane) [Source:RGD Symbol;Acc:1560542]	19.2	6.32	-1.6	0.0031	0.336129	yes	DOWN	N	N	Y	Y	Y	19.28	6.29
TBIG013335	ENSRNOG00000019422	Egr1	early growth response 1 [Source:RGD Symbol;Acc:2544]	58.9	18.9	-1.64	0.0032	0.343698	yes	DOWN	N	N	Y	Y	Y	59.16	18.77
TBIG017099	XLOC_017099	Ddah2	N(G),N(G)-dimethylarginine dimethylaminohydrolase 2 [Source:SWISS;Acc:Q6MG60]	147	49.7	-1.57	0.0032	0.343698	yes	DOWN	N	N	Y	Y	Y	147.98	49.5
TBIG000159	ENSRNOG00000014166.L01	Smoc2	SPARC related modular calcium binding 2 [Source:RGD Symbol;Acc:1306681]	8.71	1.2	-2.86	0.00325	0.344198	yes	DOWN	N	N	Y	Y	Y	8.75	1.2
TBIG009943	ENSRNOG00000028108.L01	Cytl1	cytokine like 1 [Source:RGD Symbol;Acc:1561846]	150	52.4	-1.51	0.00325	0.344198	yes	DOWN	N	N	Y	Y	Y	150.43	52.15
TBIG023108	ENSRNOG00000009797	Aqp3	aquaporin 3 [Source:RGD Symbol;Acc:68428]	767	177	-2.12	0.0033	0.344683	yes	DOWN	N	N	Y	Y	Y	770.67	175.75
TBIG023253	ENSRNOG00000049585.L01	Tnc	tenascin C [Source:RGD Symbol;Acc:621057]	9.86	1.6	-2.63	0.0033	0.344683	yes	DOWN	N	N	Y	Y	Y	9.9	1.59
TBIG022705	ENSRNOG00000011502	Col9a2	collagen, type IX, alpha 2 [Source:RGD Symbol;Acc:1307029]	28.8	9.37	-1.62	0.0033	0.344683	yes	DOWN	N	N	Y	Y	Y	28.9	9.32
TBIG021532	XLOC_021532	Mxd1	Max dimerization protein 1 [Source:SWISS;Acc:P50538]	88.1	28.2	-1.65	0.00335	0.348308	yes	DOWN	N	N	Y	Y	Y	88.55	28.03
TBIG017692	ENSRNOG00000000323.L01	Prdm1	PR domain containing 1, with ZNF domain [Source:RGD Symbol;Acc:1311765]	5.98	1.04	-2.53	0.0034	0.3519	yes	DOWN	N	N	Y	Y	Y	6.01	1.03
TBIG000682	ENSRNOG00000013823.L01	Cers3	ceramide synthase 3 [Source:RGD Symbol;Acc:1564356]	6.96	0.791	-3.14	0.00345	0.353858	yes	DOWN	N	N	Y	Y	Y	7	0.79
TBIG008442	ENSRNOG00000002403.L01	Fam129a	family with sequence similarity 129, member A [Source:RGD Symbol;Acc:71088]	41.8	14	-1.58	0.00355	0.35926	yes	DOWN	N	N	Y	Y	Y	41.97	13.9
TBIG022814	ENSRNOG00000016810.L01	Stmn1	stathmin 1 [Source:RGD Symbol;Acc:2992]	80.4	27.4	-1.55	0.00355	0.35926	yes	DOWN	N	N	Y	Y	Y	80.76	27.24
TBIG018405	ENSRNOG00000005715.L01	Lgr4	leucine-rich repeat-containing G protein-coupled receptor 4 [Source:RGD Symbol;Acc:628615]	64.5	22.6	-1.51	0.00375	0.372871	yes	DOWN	N	N	Y	Y	Y	64.78	22.45
TBIG021091	ENSRNOG00000008676.L01	Emp1	epithelial membrane protein 1 [Source:RGD Symbol;Acc:2552]	775	152	-2.35	0.00395	0.387679	yes	DOWN	N	N	Y	Y	Y	778.75	150.81
TBIG018451	XLOC_018451	Thbs1	Thrombospondin-1 [Source:SWISS;Acc:P35441]	19.9	3.13	-2.67	0.0042	0.405229	yes	DOWN	N	N	Y	Y	Y	19.98	3.11
TBIG026788	ENSRNOG00000023828.L01	LOC680875	similar to dystonin isoform 1 [Source:RGD Symbol;Acc:1587008]	56.2	13.9	-2.01	0.00435	0.416174	yes	DOWN	N	N	Y	Y	Y	56.45	13.84
TBIG006849	XLOC_006849	2016-09-05	Septin-5 [Source:SWISS;Acc:Q9BGQ3]	24	6.51	-1.89	0.0046	0.422771	yes	DOWN	N	N	Y	Y	Y	24.14	6.47
TBIG008774	ENSRNOG00000010076.L01	Pkp1	plakophilin 1 [Source:RGD Symbol;Acc:1307472]	150	47.4	-1.66	0.00475	0.422771	yes	DOWN	N	N	Y	Y	Y	150.34	47.18
TBIG007125	ENSRNOG00000001925.L01	Leprel1	leprecan-like 1 [Source:RGD Symbol;Acc:1304568]	27.9	9.23	-1.6	0.0048	0.422771	yes	DOWN	N	N	Y	Y	Y	28.03	9.18
TBIG028470	ENSRNOG00000011381	Acsbg1	acyl-CoA synthetase bubblegum family member 1 [Source:RGD Symbol;Acc:708557]	12.3	2.43	-2.33	0.00485	0.422771	yes	DOWN	N	N	Y	Y	Y	12.31	2.42
TBIG006938	ENSRNOG00000021569.L01	Tiam1	T-cell lymphoma invasion and metastasis 1 [Source:RGD Symbol;Acc:1307455]	20.1	7.58	-1.41	0.0049	0.422771	yes	DOWN	N	N	Y	Y	Y	20.22	7.54
TBIG018152	ENSRNOG00000005743	Dapl1	death associated protein-like 1 [Source:RGD Symbol;Acc:1309610]	285	98.2	-1.53	0.0054	0.422771	yes	DOWN	N	N	Y	Y	Y	285.99	97.77
TBIG023275	ENSRNOG00000042603.L01	Ttc39b	tetratricopeptide repeat domain 39B [Source:RGD Symbol;Acc:1305797]	9.74	3.09	-1.66	0.0054	0.422771	yes	DOWN	N	N	Y	Y	Y	9.79	3.07
TBIG006740	ENSRNOG00000033933	Stfa3	stefin A3 [Source:RGD Symbol;Acc:1307831]	110	7.55	-3.87	0.00545	0.422771	yes	DOWN	N	N	Y	Y	Y	110.66	7.52
TBIG015077	ENSRNOG00000013140.L01	Pdzd2	PDZ domain containing 2 [Source:RGD Symbol;Acc:619958]	14	5.37	-1.38	0.0055	0.422771	yes	DOWN	N	N	Y	Y	Y	14.03	5.35
TBIG029920	ENSRNOG00000018276.L01	Mgat4a	mannosyl (alpha-1,3-)-glycoprotein beta-1,4-N-acetylglucosaminyltransferase, isozyme A [Source:RGD Symbol;Acc:1305650]	23.9	9.14	-1.38	0.00585	0.422771	yes	DOWN	N	N	Y	Y	Y	23.97	9.09
TBIG002339	ENSRNOG00000011160.L01	Sv2b	synaptic vesicle glycoprotein 2b [Source:RGD Symbol;Acc:619716]	4.24	0.412	-3.36	0.00595	0.422771	yes	DOWN	N	N	Y	Y	Y	4.27	0.41
TBIG023259	ENSRNOG00000005932.L01	Megf9	multiple EGF-like-domains 9 [Source:RGD Symbol;Acc:1308330]	14.1	5.1	-1.47	0.00605	0.422771	yes	DOWN	N	N	Y	Y	Y	14.14	5.07
TBIG008383	ENSRNOG00000003031.L01	Atp2b4	ATPase, Ca++ transporting, plasma membrane 4 [Source:RGD Symbol;Acc:621305]	11	4.03	-1.45	0.00615	0.422771	yes	DOWN	N	N	Y	Y	Y	11.03	4.01
TBIG015980	XLOC_015980	-	-	2.32	0.187	-3.63	0.00615	0.422771	yes	DOWN	N	N	Y	Y	Y	2.33	0.19
TBIG019456	ENSRNOG00000005404.L01	Rasgrp1	RAS guanyl releasing protein 1 (calcium and DAG-regulated) [Source:RGD Symbol;Acc:3539]	12.5	4.26	-1.55	0.00615	0.422771	yes	DOWN	N	N	Y	Y	Y	12.51	4.24
TBIG015646	ENSRNOG00000009339.L01	Cenpe	centromere protein E [Source:RGD Symbol;Acc:1307115]	2.4	0.559	-2.1	0.00625	0.422771	yes	DOWN	N	N	Y	Y	Y	2.41	0.56
TBIG010839	XLOC_010839	pol	Pol polyprotein [Source:SWISS;Acc:P51517]	4.22	0.671	-2.65	0.00635	0.422771	yes	DOWN	N	N	Y	Y	Y	4.25	0.67
TBIG009477	ENSRNOG00000002302.L01	Corin	corin, serine peptidase [Source:RGD Symbol;Acc:727887]	4.15	0.513	-3.01	0.00655	0.422771	yes	DOWN	N	N	Y	Y	Y	4.17	0.51
TBIG005804	ENSRNOG00000030170.L01	Krt10	keratin 10 [Source:RGD Symbol;Acc:1359092]	12.8	3.33	-1.94	0.00665	0.422771	yes	DOWN	N	N	Y	Y	Y	12.84	3.31
TBIG019580	ENSRNOG00000021274.L01	Fermt1	fermitin family member 1 [Source:RGD Symbol;Acc:1306816]	14	4.93	-1.51	0.00665	0.422771	yes	DOWN	N	N	Y	Y	Y	14.08	4.91
TBIG003028	ENSRNOG00000021140.L01	Kcnk4	potassium channel, subfamily K, member 4 [Source:RGD Symbol;Acc:621449]	14.7	4.93	-1.58	0.0067	0.422771	yes	DOWN	N	N	Y	Y	Y	14.8	4.9
TBIG021512	ENSRNOG00000015076.L01	Cyp26b1	cytochrome P450, family 26, subfamily b, polypeptide 1 [Source:RGD Symbol;Acc:631379]	9.01	2.56	-1.81	0.0069	0.422771	yes	DOWN	N	N	Y	Y	Y	9.06	2.55
TBIG029537	ENSRNOG00000031232.L01	Nrp2	neuropilin 2 [Source:RGD Symbol;Acc:621442]	7.69	2.59	-1.57	0.007	0.422771	yes	DOWN	N	N	Y	Y	Y	7.73	2.58
TBIG009984	ENSRNOG00000017775.L01	Slc5a1	solute carrier family 5 (sodium/glucose cotransporter), member 1 [Source:RGD Symbol;Acc:3713]	5.94	1.38	-2.1	0.00705	0.422771	yes	DOWN	N	N	Y	Y	Y	5.97	1.38
TBIG017100	ENSRNOG00000027157.L01	Ly6g6e	lymphocyte antigen 6 complex, locus G6E [Source:RGD Symbol;Acc:1303112]	76	18.6	-2.03	0.00705	0.422771	yes	DOWN	N	N	Y	Y	Y	76.41	18.52
TBIG009372	ENSRNOG00000002188.L01	Hpse	heparanase [Source:RGD Symbol;Acc:61969]	39.5	13	-1.61	0.0072	0.422771	yes	DOWN	N	N	Y	Y	Y	39.73	12.93
TBIG018454	ENSRNOG00000007906.L01	Bub1b	BUB1 mitotic checkpoint serine/threonine kinase B [Source:RGD Symbol;Acc:619791]	5.74	0.91	-2.66	0.00735	0.422771	yes	DOWN	N	N	Y	Y	Y	5.77	0.91
TBIG001744	ENSRNOG00000028261.L01	Tppp	tubulin polymerization promoting protein [Source:RGD Symbol;Acc:1310121]	33.2	13	-1.35	0.00745	0.422771	yes	DOWN	N	N	Y	Y	Y	33.35	12.94
TBIG013661	ENSRNOG00000018646	Hbegf	heparin-binding EGF-like growth factor [Source:RGD Symbol;Acc:2526]	17.7	3.3	-2.42	0.00745	0.422771	yes	DOWN	N	N	Y	Y	Y	17.75	3.28
TBIG022375	ENSRNOG00000007030.L01	Epha7	Eph receptor A7 [Source:RGD Symbol;Acc:70957]	9.8	3.56	-1.46	0.00755	0.422771	yes	DOWN	N	N	Y	Y	Y	9.85	3.55
TBIG021073	ENSRNOG00000019939.L01	Ccnd2	cyclin D2 [Source:RGD Symbol;Acc:621083]	140	45	-1.64	0.0076	0.422771	yes	DOWN	N	N	Y	Y	Y	140.49	44.79
TBIG026160	ENSRNOG00000022268.L01	Pnpla3	patatin-like phospholipase domain containing 3 [Source:RGD Symbol;Acc:1595843]	11.4	3.08	-1.89	0.00785	0.422771	yes	DOWN	N	N	Y	Y	Y	11.48	3.06
TBIG022741	ENSRNOG00000010841.L01	Col8a2	collagen, type VIII, alpha 2 [Source:RGD Symbol;Acc:1305182]	9.1	2.36	-1.95	0.00795	0.422771	yes	DOWN	N	N	Y	Y	Y	9.15	2.35
TBIG005751	ENSRNOG00000049998.L02	B4galnt2	beta-1,4-N-acetyl-galactosaminyl transferase 2 [Source:MGI Symbol;Acc:MGI:1342058]	20.9	6.87	-1.6	0.008	0.422771	yes	DOWN	N	N	Y	Y	Y	20.96	6.84
TBIG001493	ENSRNOG00000018929.L01	Kif20b	kinesin family member 20B [Source:RGD Symbol;Acc:1308497]	2.5	0.456	-2.46	0.00825	0.422771	yes	DOWN	N	N	Y	Y	Y	2.51	0.45
TBIG018208	ENSRNOG00000001514	Cdca7	cell division cycle associated 7 [Source:RGD Symbol;Acc:1309363]	33.7	12.1	-1.48	0.00835	0.422771	yes	DOWN	N	N	Y	Y	Y	33.84	12.05
TBIG009829	ENSRNOG00000002002.L01	Tmprss11bnl	transmembrane protease, serine 11B N terminal like [Source:RGD Symbol;Acc:1303278]	70.1	25.7	-1.45	0.00845	0.422771	yes	DOWN	N	N	Y	Y	Y	70.42	25.62
TBIG010627	ENSRNOG00000015075.L01	Stc1	stanniocalcin 1 [Source:RGD Symbol;Acc:621776]	6.26	1.17	-2.42	0.00845	0.422771	yes	DOWN	N	N	Y	Y	Y	6.3	1.16
TBIG011627	ENSRNOG00000045531	Rab11fip1	RAB11 family interacting protein 1 (class I) [Source:EntrezGene;Acc:498650]	52.7	19.7	-1.42	0.00845	0.422771	yes	DOWN	N	N	Y	Y	Y	52.93	19.59
TBIG003511	XLOC_003511	-	-	2.64	0	#NAME?	0.0085	0.422771	yes	DOWN	N	N	Y	Y	Y	2.65	0
TBIG003514	XLOC_003514	-	-	1.96	0	#NAME?	0.0085	0.422771	yes	DOWN	N	N	Y	Y	Y	1.96	0
TBIG003549	XLOC_003549	-	-	1.55	0	#NAME?	0.0085	0.422771	yes	DOWN	N	N	Y	Y	Y	1.56	0
TBIG003560	XLOC_003560	-	-	1.24	0	#NAME?	0.0085	0.422771	yes	DOWN	N	N	Y	Y	Y	1.25	0
TBIG003828	XLOC_003828	LIN1_NYCCO	LINE-1 reverse transcriptase homolog [Source:SWISS;Acc:P08548]	0.732	0	#NAME?	0.0085	0.422771	yes	DOWN	N	N	Y	Y	Y	0.74	0
TBIG004038	XLOC_004038	env	Envelope glycoprotein [Source:SWISS;Acc:P26804]	2.12	0	#NAME?	0.0085	0.422771	yes	DOWN	N	N	Y	Y	Y	2.13	0
TBIG004084	XLOC_004084	-	-	1.33	0	#NAME?	0.0085	0.422771	yes	DOWN	N	N	Y	Y	Y	1.33	0
TBIG004127	XLOC_004127	-	-	15.1	0	#NAME?	0.0085	0.422771	yes	DOWN	N	N	Y	Y	Y	15.14	0
TBIG006128	XLOC_006128	-	-	1.56	0	#NAME?	0.0085	0.422771	yes	DOWN	N	N	Y	Y	Y	1.57	0
TBIG006264	XLOC_006264	-	-	0.911	0	#NAME?	0.0085	0.422771	yes	DOWN	N	N	Y	Y	Y	0.92	0
TBIG007312	XLOC_007312	-	-	0.605	0	#NAME?	0.0085	0.422771	yes	DOWN	N	N	Y	Y	Y	0.61	0
TBIG008176	XLOC_008176	-	-	3.17	0	#NAME?	0.0085	0.422771	yes	DOWN	N	N	Y	Y	Y	3.18	0
TBIG008179	XLOC_008179	-	-	13.4	0	#NAME?	0.0085	0.422771	yes	DOWN	N	N	Y	Y	Y	13.45	0
TBIG009068	XLOC_009068	Pol	Retrovirus-related Pol polyprotein LINE-1 [Source:SWISS;Acc:P11369]	1	0	#NAME?	0.0085	0.422771	yes	DOWN	N	N	Y	Y	Y	1.01	0
TBIG010104	XLOC_010104	-	-	1.13	0	#NAME?	0.0085	0.422771	yes	DOWN	N	N	Y	Y	Y	1.14	0
TBIG010131	XLOC_010131	-	-	2.3	0	#NAME?	0.0085	0.422771	yes	DOWN	N	N	Y	Y	Y	2.32	0
TBIG012193	XLOC_012193	-	-	1.02	0	#NAME?	0.0085	0.422771	yes	DOWN	N	N	Y	Y	Y	1.03	0
TBIG012243	XLOC_012243	-	-	1.56	0	#NAME?	0.0085	0.422771	yes	DOWN	N	N	Y	Y	Y	1.56	0
TBIG013182	XLOC_013182	-	-	1.2	0	#NAME?	0.0085	0.422771	yes	DOWN	N	N	Y	Y	Y	1.21	0
TBIG016674	XLOC_016674	-	-	1.06	0	#NAME?	0.0085	0.422771	yes	DOWN	N	N	Y	Y	Y	1.06	0
TBIG016846	XLOC_016846	-	-	3.76	0	#NAME?	0.0085	0.422771	yes	DOWN	N	N	Y	Y	Y	3.78	0
TBIG016851	XLOC_016851	-	-	1.16	0	#NAME?	0.0085	0.422771	yes	DOWN	N	N	Y	Y	Y	1.17	0
TBIG016967	XLOC_016967	-	-	4.07	0	#NAME?	0.0085	0.422771	yes	DOWN	N	N	Y	Y	Y	4.09	0
TBIG017844	XLOC_017844	-	-	2.08	0	#NAME?	0.0085	0.422771	yes	DOWN	N	N	Y	Y	Y	2.09	0
TBIG020099	XLOC_020099	-	-	1.33	0	#NAME?	0.0085	0.422771	yes	DOWN	N	N	Y	Y	Y	1.34	0
TBIG018408	XLOC_018408	-	-	1.38	0	#NAME?	0.0085	0.422771	yes	DOWN	N	N	Y	Y	Y	1.39	0
TBIG020214	XLOC_020214	-	-	2.62	0	#NAME?	0.0085	0.422771	yes	DOWN	N	N	Y	Y	Y	2.63	0
TBIG020330	XLOC_020330	HCG22	Protein PBMUCL2 [Source:SWISS;Acc:E2RYF7]	1.92	0	#NAME?	0.0085	0.422771	yes	DOWN	N	N	Y	Y	Y	1.93	0
TBIG020349	XLOC_020349	-	-	7.31	0	#NAME?	0.0085	0.422771	yes	DOWN	N	N	Y	Y	Y	7.35	0
TBIG021920	XLOC_021920	-	-	1.27	0	#NAME?	0.0085	0.422771	yes	DOWN	N	N	Y	Y	Y	1.28	0
TBIG021957	XLOC_021957	-	-	1.41	0	#NAME?	0.0085	0.422771	yes	DOWN	N	N	Y	Y	Y	1.42	0
TBIG023906	XLOC_023906	-	-	0.984	0	#NAME?	0.0085	0.422771	yes	DOWN	N	N	Y	Y	Y	0.99	0
TBIG024082	XLOC_024082	-	-	8.45	0	#NAME?	0.0085	0.422771	yes	DOWN	N	N	Y	Y	Y	8.49	0
TBIG024130	XLOC_024130	-	-	1.89	0	#NAME?	0.0085	0.422771	yes	DOWN	N	N	Y	Y	Y	1.9	0
TBIG025297	XLOC_025297	-	-	0.719	0	#NAME?	0.0085	0.422771	yes	DOWN	N	N	Y	Y	Y	0.72	0
TBIG027111	XLOC_027111	-	-	1.51	0	#NAME?	0.0085	0.422771	yes	DOWN	N	N	Y	Y	Y	1.52	0
TBIG027129	XLOC_027129	-	-	0.804	0	#NAME?	0.0085	0.422771	yes	DOWN	N	N	Y	Y	Y	0.81	0
TBIG027130	XLOC_027130	-	-	48.3	0	#NAME?	0.0085	0.422771	yes	DOWN	N	N	Y	Y	Y	48.5	0
TBIG027165	XLOC_027165	-	-	0.714	0	#NAME?	0.0085	0.422771	yes	DOWN	N	N	Y	Y	Y	0.72	0
TBIG027364	XLOC_027364	Nedd4	E3 ubiquitin-protein ligase NEDD4 [Source:SWISS;Acc:P46935]	1.4	0	#NAME?	0.0085	0.422771	yes	DOWN	N	N	Y	Y	Y	1.4	0
TBIG027377	XLOC_027377	-	-	1.21	0	#NAME?	0.0085	0.422771	yes	DOWN	N	N	Y	Y	Y	1.22	0
TBIG027389	XLOC_027389	-	-	1.08	0	#NAME?	0.0085	0.422771	yes	DOWN	N	N	Y	Y	Y	1.08	0
TBIG027426	XLOC_027426	-	-	1.29	0	#NAME?	0.0085	0.422771	yes	DOWN	N	N	Y	Y	Y	1.3	0
TBIG030265	XLOC_030265	-	-	1.13	0	#NAME?	0.0085	0.422771	yes	DOWN	N	N	Y	Y	Y	1.13	0
TBIG030300	XLOC_030300	-	-	2.51	0	#NAME?	0.0085	0.422771	yes	DOWN	N	N	Y	Y	Y	2.52	0
TBIG004086	XLOC_004086	-	-	1.49	0	#NAME?	0.0086	0.422771	yes	DOWN	N	N	Y	Y	Y	1.5	0
TBIG006389	XLOC_006389	-	-	2.9	0	#NAME?	0.0086	0.422771	yes	DOWN	N	N	Y	Y	Y	2.91	0
TBIG007014	XLOC_007014	MYH15	Myosin-15 [Source:SWISS;Acc:Q9Y2K3]	2.31	0	#NAME?	0.0086	0.422771	yes	DOWN	N	N	Y	Y	Y	2.32	0
TBIG006800	XLOC_006800	-	-	1.15	0	#NAME?	0.0086	0.422771	yes	DOWN	N	N	Y	Y	Y	1.16	0
TBIG008098	XLOC_008098	-	-	222	0	#NAME?	0.0086	0.422771	yes	DOWN	N	N	Y	Y	Y	223.25	0
TBIG010193	XLOC_010193	-	-	1.21	0	#NAME?	0.0086	0.422771	yes	DOWN	N	N	Y	Y	Y	1.22	0
TBIG010249	XLOC_010249	-	-	0.912	0	#NAME?	0.0086	0.422771	yes	DOWN	N	N	Y	Y	Y	0.92	0
TBIG013241	XLOC_013241	-	-	0.975	0	#NAME?	0.0086	0.422771	yes	DOWN	N	N	Y	Y	Y	0.98	0
TBIG014785	XLOC_014785	rbm8a	RNA-binding protein 8A [Source:SWISS;Acc:B5DGI7]	1.28	0	#NAME?	0.0086	0.422771	yes	DOWN	N	N	Y	Y	Y	1.28	0
TBIG016844	XLOC_016844	-	-	2.52	0	#NAME?	0.0086	0.422771	yes	DOWN	N	N	Y	Y	Y	2.54	0
TBIG020021	XLOC_020021	-	-	0.982	0	#NAME?	0.0086	0.422771	yes	DOWN	N	N	Y	Y	Y	0.99	0
TBIG022148	XLOC_022148	-	-	1.04	0	#NAME?	0.0086	0.422771	yes	DOWN	N	N	Y	Y	Y	1.04	0
TBIG023905	XLOC_023905	-	-	0.98	0	#NAME?	0.0086	0.422771	yes	DOWN	N	N	Y	Y	Y	0.98	0
TBIG025478	XLOC_025478	-	-	1	0	#NAME?	0.0086	0.422771	yes	DOWN	N	N	Y	Y	Y	1.01	0
TBIG028970	XLOC_028970	-	-	1.51	0	#NAME?	0.0086	0.422771	yes	DOWN	N	N	Y	Y	Y	1.52	0
TBIG008881	ENSRNOG00000003038.L01	Sft2d2	SFT2 domain containing 2 [Source:RGD Symbol;Acc:1310623]	65.4	19.2	-1.77	0.00865	0.422771	yes	DOWN	N	N	Y	Y	Y	65.73	19.14
TBIG007104	ENSRNOG00000001739	Mfi2	antigen p97 (melanoma associated) identified by monoclonal antibodies 133.2 and 96.5 [Source:RGD Symbol;Acc:1308155]	3.34	0.514	-2.7	0.0087	0.422771	yes	DOWN	N	N	Y	Y	Y	3.35	0.51
TBIG013728	ENSRNOG00000043219.L01	Fbn2	fibrillin 2 [Source:RGD Symbol;Acc:620910]	2.65	0.73	-1.86	0.0087	0.422771	yes	DOWN	N	N	Y	Y	Y	2.67	0.73
TBIG010604	ENSRNOG00000015921	Esco2	establishment of sister chromatid cohesion N-acetyltransferase 2 [Source:RGD Symbol;Acc:1593313]	3.04	0.486	-2.64	0.00885	0.422771	yes	DOWN	N	N	Y	Y	Y	3.05	0.48
TBIG008063	XLOC_008063	-	-	1.24	0	#NAME?	0.009	0.422771	yes	DOWN	N	N	Y	Y	Y	1.25	0
TBIG009145	XLOC_009145	-	-	4.14	0	#NAME?	0.009	0.422771	yes	DOWN	N	N	Y	Y	Y	4.16	0
TBIG012180	XLOC_012180	-	-	0.995	0	#NAME?	0.009	0.422771	yes	DOWN	N	N	Y	Y	Y	1	0
TBIG012393	XLOC_012393	-	-	2.92	0	#NAME?	0.009	0.422771	yes	DOWN	N	N	Y	Y	Y	2.94	0
TBIG014712	XLOC_014712	-	-	1.26	0	#NAME?	0.009	0.422771	yes	DOWN	N	N	Y	Y	Y	1.27	0
TBIG014725	XLOC_014725	-	-	0.804	0	#NAME?	0.009	0.422771	yes	DOWN	N	N	Y	Y	Y	0.81	0
TBIG016787	XLOC_016787	-	-	1.12	0	#NAME?	0.009	0.422771	yes	DOWN	N	N	Y	Y	Y	1.12	0
TBIG016963	XLOC_016963	-	-	0.593	0	#NAME?	0.009	0.422771	yes	DOWN	N	N	Y	Y	Y	0.6	0
TBIG019441	XLOC_019441	Ryr3	Ryanodine receptor 3 [Source:SWISS;Acc:A2AGL3]	2.55	0	#NAME?	0.009	0.422771	yes	DOWN	N	N	Y	Y	Y	2.56	0
TBIG020120	XLOC_020120	-	-	0.841	0	#NAME?	0.009	0.422771	yes	DOWN	N	N	Y	Y	Y	0.85	0
TBIG020277	XLOC_020277	-	-	2.12	0	#NAME?	0.009	0.422771	yes	DOWN	N	N	Y	Y	Y	2.13	0
TBIG021919	XLOC_021919	Pol	Retrovirus-related Pol polyprotein LINE-1 [Source:SWISS;Acc:P11369]	1.31	0	#NAME?	0.009	0.422771	yes	DOWN	N	N	Y	Y	Y	1.32	0
TBIG025764	ENSRNOG00000025293	Prss57	protease, serine, 57 [Source:RGD Symbol;Acc:1303330]	1.13	0	#NAME?	0.009	0.422771	yes	DOWN	N	N	Y	Y	Y	1.13	0
TBIG027272	XLOC_027272	-	-	0.832	0	#NAME?	0.009	0.422771	yes	DOWN	N	N	Y	Y	Y	0.84	0
TBIG031512	XLOC_031512	-	-	2.59	0	#NAME?	0.009	0.422771	yes	DOWN	N	N	Y	Y	Y	2.6	0
TBIG015041	ENSRNOG00000016552.L01	Hmgcs1	3-hydroxy-3-methylglutaryl-CoA synthase 1 (soluble) [Source:RGD Symbol;Acc:70970]	31.5	12.3	-1.36	0.00915	0.422771	yes	DOWN	N	N	Y	Y	Y	31.66	12.26
TBIG008654	ENSRNOG00000004487.L01	Nek2	NIMA-related kinase 2 [Source:RGD Symbol;Acc:619792]	2.48	0.226	-3.46	0.0092	0.422771	yes	DOWN	N	N	Y	Y	Y	2.5	0.22
TBIG002004	ENSRNOG00000046667.L01	Fosb	FBJ osteosarcoma oncogene B [Source:RGD Symbol;Acc:1308198]	15.7	5.85	-1.42	0.00935	0.422771	yes	DOWN	N	N	Y	Y	Y	15.76	5.82
TBIG021245	ENSRNOG00000033618.L01	Col28a1	collagen, type XXVIII, alpha 1 [Source:RGD Symbol;Acc:1564680]	4.71	0.941	-2.32	0.00945	0.422771	yes	DOWN	N	N	Y	Y	Y	4.73	0.94
TBIG024818	ENSRNOG00000010667.L01	Ept1	ethanolaminephosphotransferase 1 (CDP-ethanolamine-specific) [Source:RGD Symbol;Acc:1560938]	27	9.46	-1.51	0.00955	0.422771	yes	DOWN	N	N	Y	Y	Y	27.17	9.42
TBIG003547	XLOC_003547	-	-	1.76	0	#NAME?	0.0096	0.422771	yes	DOWN	N	N	Y	Y	Y	1.77	0
TBIG003631	XLOC_003631	-	-	1.88	0	#NAME?	0.0096	0.422771	yes	DOWN	N	N	Y	Y	Y	1.89	0
TBIG004058	XLOC_004058	-	-	3.82	0	#NAME?	0.0096	0.422771	yes	DOWN	N	N	Y	Y	Y	3.84	0
TBIG006250	XLOC_006250	-	-	1.08	0	#NAME?	0.0096	0.422771	yes	DOWN	N	N	Y	Y	Y	1.09	0
TBIG006383	XLOC_006383	-	-	1.05	0	#NAME?	0.0096	0.422771	yes	DOWN	N	N	Y	Y	Y	1.06	0
TBIG006472	XLOC_006472	-	-	1.53	0	#NAME?	0.0096	0.422771	yes	DOWN	N	N	Y	Y	Y	1.53	0
TBIG009186	XLOC_009186	-	-	1.81	0	#NAME?	0.0096	0.422771	yes	DOWN	N	N	Y	Y	Y	1.81	0
TBIG013197	XLOC_013197	-	-	0.893	0	#NAME?	0.0096	0.422771	yes	DOWN	N	N	Y	Y	Y	0.9	0
TBIG014760	XLOC_014760	-	-	2.61	0	#NAME?	0.0096	0.422771	yes	DOWN	N	N	Y	Y	Y	2.63	0
TBIG016532	XLOC_016532	-	-	1.05	0	#NAME?	0.0096	0.422771	yes	DOWN	N	N	Y	Y	Y	1.05	0
TBIG016583	XLOC_016583	-	-	0.853	0	#NAME?	0.0096	0.422771	yes	DOWN	N	N	Y	Y	Y	0.86	0
TBIG016742	XLOC_016742	-	-	0.763	0	#NAME?	0.0096	0.422771	yes	DOWN	N	N	Y	Y	Y	0.77	0
TBIG020151	XLOC_020151	-	-	0.801	0	#NAME?	0.0096	0.422771	yes	DOWN	N	N	Y	Y	Y	0.81	0
TBIG020352	XLOC_020352	-	-	11.4	0	#NAME?	0.0096	0.422771	yes	DOWN	N	N	Y	Y	Y	11.44	0
TBIG022084	XLOC_022084	-	-	28.6	0	#NAME?	0.0096	0.422771	yes	DOWN	N	N	Y	Y	Y	28.71	0
TBIG022231	XLOC_022231	-	-	1.09	0	#NAME?	0.0096	0.422771	yes	DOWN	N	N	Y	Y	Y	1.1	0
TBIG022239	XLOC_022239	-	-	2.96	0	#NAME?	0.0096	0.422771	yes	DOWN	N	N	Y	Y	Y	2.98	0
TBIG023745	XLOC_023745	-	-	403	0	#NAME?	0.0096	0.422771	yes	DOWN	N	N	Y	Y	Y	405.32	0
TBIG023891	XLOC_023891	-	-	0.634	0	#NAME?	0.0096	0.422771	yes	DOWN	N	N	Y	Y	Y	0.64	0
TBIG025286	XLOC_025286	-	-	1.53	0	#NAME?	0.0096	0.422771	yes	DOWN	N	N	Y	Y	Y	1.53	0
TBIG025579	XLOC_025579	-	-	1.79	0	#NAME?	0.0096	0.422771	yes	DOWN	N	N	Y	Y	Y	1.8	0
TBIG025599	XLOC_025599	-	-	0.73	0	#NAME?	0.0096	0.422771	yes	DOWN	N	N	Y	Y	Y	0.73	0
TBIG029860	ENSRNOG00000025654.L01	Gpr110	G protein-coupled receptor 110 [Source:RGD Symbol;Acc:1310285]	3.89	0.4	-3.28	0.0097	0.422771	yes	DOWN	N	N	Y	Y	Y	3.91	0.4
TBIG010641	ENSRNOG00000011427.L01	Hr	hair growth associated [Source:RGD Symbol;Acc:620634]	41.6	16.3	-1.35	0.00975	0.422771	yes	DOWN	N	N	Y	Y	Y	41.8	16.19
TBIG025623	XLOC_025623	-	-	13	2.04	-2.68	0.0098	0.422771	yes	DOWN	N	N	Y	Y	Y	13.07	2.03
TBIG017133	ENSRNOG00000000521.L01	Cdkn1a	cyclin-dependent kinase inhibitor 1A [Source:RGD Symbol;Acc:69328]	73.2	29.4	-1.32	0.00985	0.422771	yes	DOWN	N	N	Y	Y	Y	73.6	29.28
TBIG000061	ENSRNOG00000013994.L01	Enpp1	ectonucleotide pyrophosphatase/phosphodiesterase 1 [Source:RGD Symbol;Acc:628825]	14.7	5.09	-1.53	0.0101	0.422771	yes	DOWN	N	N	N	Y	Y	14.79	5.07
TBIG014137	ENSRNOG00000008450	LOC100359539	ribonucleotide reductase M2 polypeptide [Source:RGD Symbol;Acc:2323655]	8.18	1.67	-2.29	0.01015	0.422771	yes	DOWN	N	N	N	Y	Y	8.22	1.66
TBIG009925	ENSRNOG00000038572.L01	Ncapg	non-SMC condensin I complex, subunit G [Source:RGD Symbol;Acc:1562646]	3.12	0.645	-2.28	0.0102	0.422771	yes	DOWN	N	N	N	Y	Y	3.14	0.64
TBIG007650	ENSRNOG00000001192	Gltp	glycolipid transfer protein [Source:RGD Symbol;Acc:1564442]	189	73.9	-1.35	0.01025	0.422771	yes	DOWN	N	N	N	Y	Y	189.76	73.49
TBIG024384	ENSRNOG00000023272	Rrm2	ribonucleotide reductase M2 [Source:RGD Symbol;Acc:1598310]	12.4	1.97	-2.65	0.0103	0.422771	yes	DOWN	N	N	N	Y	Y	12.45	1.96
TBIG006016	ENSRNOG00000047314.L01	Tk1	thymidine kinase 1, soluble [Source:RGD Symbol;Acc:621014]	18.3	3.69	-2.31	0.0106	0.422771	yes	DOWN	N	N	N	Y	Y	18.35	3.67
TBIG024706	ENSRNOG00000004968.L01	Ncapg2	non-SMC condensin II complex, subunit G2 [Source:RGD Symbol;Acc:1308406]	4.12	1.03	-2	0.01065	0.422771	yes	DOWN	N	N	N	Y	Y	4.14	1.03
TBIG015773	ENSRNOG00000016122	Hmgcr	3-hydroxy-3-methylglutaryl-CoA reductase [Source:RGD Symbol;Acc:2803]	29.6	12	-1.3	0.01085	0.422771	yes	DOWN	N	N	N	Y	Y	29.72	11.95
TBIG024285	ENSRNOG00000004188.L01	LOC298795	similar to 14-3-3 protein sigma [Source:RGD Symbol;Acc:1359510]	26.8	6.85	-1.97	0.01095	0.422771	yes	DOWN	N	N	N	Y	Y	26.88	6.81
TBIG018452	ENSRNOG00000045829.L01	Thbs1	thrombospondin 1 [Source:RGD Symbol;Acc:1588455]	27.8	11	-1.33	0.01115	0.422771	yes	DOWN	N	N	N	Y	Y	27.91	10.97
TBIG022643	ENSRNOG00000008161.L01	Pdzk1ip1	PDZK1 interacting protein 1 [Source:RGD Symbol;Acc:620952]	86.9	31.2	-1.48	0.0112	0.422771	yes	DOWN	N	N	N	Y	Y	87.28	31.04
TBIG024373	ENSRNOG00000005660.L01	Fam110c	family with sequence similarity 110, member C [Source:RGD Symbol;Acc:1564713]	27.7	10.8	-1.35	0.0117	0.422771	yes	DOWN	N	N	N	Y	Y	27.79	10.79
TBIG003421	XLOC_003421	-	-	0.627	0	#NAME?	0.0118	0.422771	yes	DOWN	N	N	N	Y	Y	0.63	0
TBIG020133	XLOC_020133	-	-	2.65	0	#NAME?	0.0118	0.422771	yes	DOWN	N	N	N	Y	Y	2.66	0
TBIG022153	XLOC_022153	-	-	0.936	0	#NAME?	0.0118	0.422771	yes	DOWN	N	N	N	Y	Y	0.94	0
TBIG026623	XLOC_026623	-	-	14.3	0	#NAME?	0.0118	0.422771	yes	DOWN	N	N	N	Y	Y	14.42	0
TBIG012573	ENSRNOG00000017882.L01	Camk1d	calcium/calmodulin-dependent protein kinase ID [Source:RGD Symbol;Acc:1560691]	11.5	4.55	-1.34	0.0119	0.422771	yes	DOWN	N	N	N	Y	Y	11.55	4.53
TBIG024777	ENSRNOG00000008806.L01	Clip4	CAP-GLY domain containing linker protein family, member 4 [Source:RGD Symbol;Acc:1311049]	51.1	21.1	-1.28	0.0119	0.422771	yes	DOWN	N	N	N	Y	Y	51.38	21.02
TBIG012904	ENSRNOG00000017163	Pfkp	phosphofructokinase, platelet [Source:RGD Symbol;Acc:61893]	17.1	5.94	-1.53	0.01195	0.422771	yes	DOWN	N	N	N	Y	Y	17.21	5.91
TBIG010960	ENSRNOG00000022116.L01	Gjb6	gap junction protein, beta 6 [Source:RGD Symbol;Acc:621830]	6.89	0.867	-2.99	0.012	0.422771	yes	DOWN	N	N	N	Y	Y	6.92	0.86
TBIG019446	ENSRNOG00000008115.L01	Arhgap11a	Rho GTPase activating protein 11A [Source:RGD Symbol;Acc:1309107]	6.8	2.05	-1.73	0.0121	0.423872	yes	DOWN	N	N	N	Y	Y	6.83	2.04
TBIG009849	ENSRNOG00000002227.L01	Kit	v-kit Hardy-Zuckerman 4 feline sarcoma viral oncogene homolog [Source:RGD Symbol;Acc:620568]	17.9	7.31	-1.29	0.01215	0.42497	yes	DOWN	N	N	N	Y	Y	18	7.28
TBIG011880	ENSRNOG00000013167	Hmgb2	high mobility group box 2 [Source:RGD Symbol;Acc:69291]	85.8	33.3	-1.37	0.0123	0.428243	yes	DOWN	N	N	N	Y	Y	86.14	33.14
TBIG028039	ENSRNOG00000029543	Cish	cytokine inducible SH2-containing protein [Source:RGD Symbol;Acc:69261]	23.5	7.75	-1.6	0.0123	0.428243	yes	DOWN	N	N	N	Y	Y	23.6	7.71
TBIG026778	ENSRNOG00000032231.L01	Mroh6	maestro heat-like repeat family member 6 [Source:RGD Symbol;Acc:2323632]	27.8	11.1	-1.32	0.0127	0.437885	yes	DOWN	N	N	N	Y	Y	27.97	11.07
TBIG007416	ENSRNOG00000001031.L01	Ocm2	oncomodulin 2 [Source:RGD Symbol;Acc:3222]	58.8	19.4	-1.6	0.01275	0.437885	yes	DOWN	N	N	N	Y	Y	59.08	19.34
TBIG012998	XLOC_012998	-	-	1.87	0	#NAME?	0.01275	0.437885	yes	DOWN	N	N	N	Y	Y	1.88	0
TBIG014749	XLOC_014749	Pol	Retrovirus-related Pol polyprotein LINE-1 [Source:SWISS;Acc:P11369]	0.963	0	#NAME?	0.01275	0.437885	yes	DOWN	N	N	N	Y	Y	0.97	0
TBIG015800	ENSRNOG00000018635.L01	Ccnb1	cyclin B1 [Source:RGD Symbol;Acc:2291]	13.6	2.88	-2.23	0.01275	0.437885	yes	DOWN	N	N	N	Y	Y	13.62	2.87
TBIG022022	XLOC_022022	-	-	1.3	0	#NAME?	0.01275	0.437885	yes	DOWN	N	N	N	Y	Y	1.3	0
TBIG021680	ENSRNOG00000014578.L01	Fxyd4	FXYD domain-containing ion transport regulator 4 [Source:RGD Symbol;Acc:70998]	90	30.5	-1.56	0.01275	0.437885	yes	DOWN	N	N	N	Y	Y	90.44	30.31
TBIG021134	ENSRNOG00000026883	Smco2	single-pass membrane protein with coiled-coil domains 2 [Source:RGD Symbol;Acc:2320294]	0.524	0	#NAME?	0.01275	0.437885	yes	DOWN	N	N	N	Y	Y	0.53	0
TBIG000381	ENSRNOG00000046500.L01	Irgq	immunity-related GTPase family, Q [Source:RGD Symbol;Acc:1309409]	19.8	8.17	-1.28	0.013	0.444459	yes	DOWN	N	N	N	Y	Y	19.91	8.13
TBIG002391	ENSRNOG00000012442.L01	Cemip	cell migration inducing protein, hyaluronan binding [Source:RGD Symbol;Acc:1305254]	2.16	0.239	-3.18	0.013	0.444459	yes	DOWN	N	N	N	Y	Y	2.17	0.24
TBIG017910	ENSRNOG00000005871.L01	Il1rn	interleukin 1 receptor antagonist [Source:RGD Symbol;Acc:621159]	22.9	7.8	-1.56	0.0131	0.446904	yes	DOWN	N	N	N	Y	Y	23.06	7.76
TBIG014779	XLOC_014779	-	-	2.37	0	#NAME?	0.0133	0.449987	yes	DOWN	N	N	N	Y	Y	2.38	0
TBIG016905	XLOC_016905	-	-	115	0	#NAME?	0.0133	0.449987	yes	DOWN	N	N	N	Y	Y	115.07	0
TBIG016427	ENSRNOG00000013771.L01	Clca2	chloride channel accessory 2 [Source:RGD Symbol;Acc:1304894]	86.9	34.7	-1.33	0.0134	0.452697	yes	DOWN	N	N	N	Y	Y	87.31	34.51
TBIG018475	ENSRNOG00000004921.L01	Nusap1	nucleolar and spindle associated protein 1 [Source:RGD Symbol;Acc:1305764]	7.59	1.71	-2.15	0.01345	0.453713	yes	DOWN	N	N	N	Y	Y	7.62	1.7
TBIG015523	ENSRNOG00000018716.L01	Dennd2c	DENN/MADD domain containing 2C [Source:RGD Symbol;Acc:1308197]	13.7	5.3	-1.37	0.0135	0.454726	yes	DOWN	N	N	N	Y	Y	13.78	5.28
TBIG010041	ENSRNOG00000004332.L01	Egfr	epidermal growth factor receptor [Source:RGD Symbol;Acc:2543]	13.8	5.82	-1.25	0.0136	0.457418	yes	DOWN	N	N	N	Y	Y	13.89	5.79
TBIG013348	ENSRNOG00000018525.L01	Slc4a9	solute carrier family 4, sodium bicarbonate cotransporter, member 9 [Source:RGD Symbol;Acc:628811]	4.36	0.639	-2.77	0.01365	0.458423	yes	DOWN	N	N	N	Y	Y	4.38	0.64
TBIG001828	ENSRNOG00000010529.L01	Thbs2	thrombospondin 2 [Source:RGD Symbol;Acc:1310979]	2.55	0.42	-2.6	0.01375	0.460423	yes	DOWN	N	N	N	Y	Y	2.56	0.42
TBIG030706	ENSRNOG00000003705.L01	Bmx	BMX non-receptor tyrosine kinase [Source:RGD Symbol;Acc:1565643]	53.9	16.6	-1.7	0.0138	0.461419	yes	DOWN	N	N	N	Y	Y	54.13	16.48
TBIG027812	ENSRNOG00000017208	Cspg4	chondroitin sulfate proteoglycan 4 [Source:RGD Symbol;Acc:619942]	4.74	1.68	-1.5	0.014	0.467419	yes	DOWN	N	N	N	Y	Y	4.76	1.67
TBIG003305	ENSRNOG00000017164.L01	Afap1l2	actin filament associated protein 1-like 2 [Source:RGD Symbol;Acc:1310668]	16.7	6.87	-1.28	0.0142	0.47202	yes	DOWN	N	N	N	Y	Y	16.79	6.84
TBIG031282	ENSRNOG00000003526.L01	Sytl4	synaptotagmin-like 4 [Source:RGD Symbol;Acc:620204]	21.6	9.04	-1.26	0.01425	0.472992	yes	DOWN	N	N	N	Y	Y	21.7	9
TBIG014187	ENSRNOG00000013808.L01	Ces2g	carboxylesterase 2G [Source:RGD Symbol;Acc:1308358]	34.4	12.5	-1.46	0.0143	0.473143	yes	DOWN	N	N	N	Y	Y	34.59	12.43
TBIG018767	ENSRNOG00000009076.L01	Ttpal	tocopherol (alpha) transfer protein-like [Source:RGD Symbol;Acc:1305754]	10.5	3.9	-1.43	0.01435	0.473143	yes	DOWN	N	N	N	Y	Y	10.58	3.88
TBIG011881	ENSRNOG00000013228	Scrg1	stimulator of chondrogenesis 1 [Source:RGD Symbol;Acc:68377]	1.26	0	#NAME?	0.0144	0.473143	yes	DOWN	N	N	N	Y	Y	1.27	0
TBIG028530	ENSRNOG00000014080.L01	Kif23	kinesin family member 23 [Source:RGD Symbol;Acc:1308596]	22.3	8.99	-1.31	0.0144	0.473143	yes	DOWN	N	N	N	Y	Y	22.37	8.94
TBIG030432	XLOC_030432	-	-	0.626	0	#NAME?	0.0144	0.473143	yes	DOWN	N	N	N	Y	Y	0.63	0
TBIG008324	ENSRNOG00000002583.L01	Serpinb11	serpin peptidase inhibitor, clade B (ovalbumin), member 11 [Source:RGD Symbol;Acc:1306497]	15.7	4.35	-1.85	0.0146	0.477225	yes	DOWN	N	N	N	Y	Y	15.77	4.33
TBIG019444	ENSRNOG00000026053	Grem1	gremlin 1 [Source:RGD Symbol;Acc:2359]	8.03	1.43	-2.49	0.01465	0.477225	yes	DOWN	N	N	N	Y	Y	8.06	1.43
TBIG018552	ENSRNOG00000026143.L01	Ckap2l	cytoskeleton associated protein 2-like [Source:RGD Symbol;Acc:1590645]	5.26	1.04	-2.34	0.01465	0.477225	yes	DOWN	N	N	N	Y	Y	5.28	1.03
TBIG027954	ENSRNOG00000029055.L01	Ttk	Ttk protein kinase [Source:RGD Symbol;Acc:1305558]	2.76	0.362	-2.93	0.01465	0.477225	yes	DOWN	N	N	N	Y	Y	2.77	0.36
TBIG021023	ENSRNOG00000015529.L01	Cdca3	cell division cycle associated 3 [Source:RGD Symbol;Acc:1359093]	10.4	2.33	-2.16	0.0149	0.484676	yes	DOWN	N	N	N	Y	Y	10.46	2.32
TBIG019472	ENSRNOG00000013380	Rhov	ras homolog family member V [Source:RGD Symbol;Acc:628824]	56.9	23.8	-1.25	0.015	0.485846	yes	DOWN	N	N	N	Y	Y	57.16	23.72
TBIG019199	ENSRNOG00000048351	Ttn	titin [Source:RGD Symbol;Acc:621114]	3.33	1.3	-1.36	0.01515	0.48862	yes	DOWN	N	N	N	Y	Y	3.35	1.3
TBIG019528	ENSRNOG00000012051.L01	Ncaph	non-SMC condensin I complex, subunit H [Source:RGD Symbol;Acc:1596799]	5.59	0.973	-2.52	0.0152	0.488847	yes	DOWN	N	N	N	Y	Y	5.61	0.97
TBIG028273	ENSRNOG00000020901.L01	S1pr5	sphingosine-1-phosphate receptor 5 [Source:RGD Symbol;Acc:620566]	34.3	13.4	-1.35	0.0155	0.492926	yes	DOWN	N	N	N	Y	Y	34.41	13.35
TBIG000810	ENSRNOG00000012494.L01	Kctd14	potassium channel tetramerization domain containing 14 [Source:RGD Symbol;Acc:1306430]	43.9	17.3	-1.35	0.0157	0.494452	yes	DOWN	N	N	N	Y	Y	44.09	17.17
TBIG012738	ENSRNOG00000014361.L01	Edn1	endothelin 1 [Source:RGD Symbol;Acc:2532]	24.6	8.77	-1.49	0.01575	0.495342	yes	DOWN	N	N	N	Y	Y	24.76	8.73
TBIG010742	ENSRNOG00000010516.L01	Plau	plasminogen activator, urokinase [Source:RGD Symbol;Acc:3343]	64.7	27.2	-1.25	0.01605	0.502003	yes	DOWN	N	N	N	Y	Y	64.97	27.11
TBIG012414	ENSRNOG00000016581.L01	Serpinb1a	serine (or cysteine) proteinase inhibitor, clade B, member 1a [Source:RGD Symbol;Acc:1306203]	265	113	-1.23	0.01605	0.502003	yes	DOWN	N	N	N	Y	Y	265.99	112.64
TBIG027726	ENSRNOG00000006403.L01	Pvrl1	poliovirus receptor-related 1 [Source:RGD Symbol;Acc:620791]	41.7	17.3	-1.27	0.0162	0.505307	yes	DOWN	N	N	N	Y	Y	41.92	17.2
TBIG010051	ENSRNOG00000005464	Lgalsl	lectin, galactoside-binding-like [Source:RGD Symbol;Acc:1307414]	70	29.9	-1.23	0.01625	0.505482	yes	DOWN	N	N	N	Y	Y	70.39	29.72
TBIG026015	ENSRNOG00000026415.L01	Col14a1	collagen, type XIV, alpha 1 [Source:RGD Symbol;Acc:1305806]	22.9	9.24	-1.31	0.0163	0.506345	yes	DOWN	N	N	N	Y	Y	23.03	9.2
TBIG009784	ENSRNOG00000002771.L01	Ereg	epiregulin [Source:RGD Symbol;Acc:620299]	3.09	0.129	-4.59	0.0165	0.509776	yes	DOWN	N	N	N	Y	Y	3.1	0.13
TBIG009437	ENSRNOG00000042714.L01	RGD1559459	similar to Expressed sequence AI788959 [Source:RGD Symbol;Acc:1559459]	6.95	2.47	-1.49	0.0168	0.514853	yes	DOWN	N	N	N	Y	Y	6.98	2.46
TBIG022515	ENSRNOG00000033527.L01	Pappa	pregnancy-associated plasma protein A [Source:RGD Symbol;Acc:1307742]	0.793	0.115	-2.79	0.0169	0.517222	yes	DOWN	N	N	N	Y	Y	0.8	0.11
TBIG021837	ENSRNOG00000027592.L01	Rerg	RAS-like, estrogen-regulated, growth-inhibitor [Source:RGD Symbol;Acc:1562829]	29.7	11.2	-1.4	0.01705	0.521112	yes	DOWN	N	N	N	Y	Y	29.82	11.2
TBIG026785	ENSRNOG00000030264	Fam83h	family with sequence similarity 83, member H [Source:RGD Symbol;Acc:1305866]	47.5	20.6	-1.2	0.0171	0.52194	yes	DOWN	N	N	N	Y	Y	47.74	20.52
TBIG018669	ENSRNOG00000008165.L01	Tpx2	TPX2, microtubule-associated [Source:RGD Symbol;Acc:1311894]	7.49	1.54	-2.28	0.01725	0.524409	yes	DOWN	N	N	N	Y	Y	7.52	1.53
TBIG008678	ENSRNOG00000014859.L01	Rnf152	ring finger protein 152 [Source:RGD Symbol;Acc:1305251]	2.8	0.869	-1.69	0.0173	0.525228	yes	DOWN	N	N	N	Y	Y	2.81	0.86
TBIG001486	ENSRNOG00000019301.L01	Lipm	lipase, family member M [Source:RGD Symbol;Acc:1304912]	9.51	1.83	-2.38	0.01745	0.528373	yes	DOWN	N	N	N	Y	Y	9.56	1.82
TBIG018543	ENSRNOG00000015445.L01	Mal	mal, T-cell differentiation protein [Source:RGD Symbol;Acc:3037]	190	78.4	-1.28	0.01745	0.528373	yes	DOWN	N	N	N	Y	Y	191.2	78
TBIG016146	ENSRNOG00000019414.L01	Tmem79	transmembrane protein 79 [Source:RGD Symbol;Acc:1309886]	20.5	7.64	-1.42	0.0177	0.533813	yes	DOWN	N	N	N	Y	Y	20.55	7.61
TBIG022434	ENSRNOG00000013598.L01	Melk	maternal embryonic leucine zipper kinase [Source:RGD Symbol;Acc:1308974]	3.03	0.407	-2.9	0.0178	0.536119	yes	DOWN	N	N	N	Y	Y	3.05	0.41
TBIG016461	XLOC_016461	pol	Pol polyprotein [Source:SWISS;Acc:P03356]	4.88	1.36	-1.84	0.018	0.539289	yes	DOWN	N	N	N	Y	Y	4.9	1.36
TBIG018457	ENSRNOG00000009334	Knstrn	kinetochore-localized astrin/SPAG5 binding protein [Source:RGD Symbol;Acc:1303240]	8.45	1.08	-2.97	0.01805	0.540077	yes	DOWN	N	N	N	Y	Y	8.49	1.07
TBIG000996	ENSRNOG00000014448.L01	Arntl	aryl hydrocarbon receptor nuclear translocator-like [Source:RGD Symbol;Acc:62003]	27	11	-1.3	0.0184	0.548387	yes	DOWN	N	N	N	Y	Y	27.08	10.91
TBIG025008	ENSRNOG00000010098.L01	Plek2	pleckstrin 2 [Source:RGD Symbol;Acc:1305786]	43.2	17.8	-1.28	0.0185	0.548496	yes	DOWN	N	N	N	Y	Y	43.43	17.74
TBIG009964	ENSRNOG00000008645.L01	Igfbp3	insulin-like growth factor binding protein 3 [Source:RGD Symbol;Acc:2874]	214	89.9	-1.25	0.01865	0.550792	yes	DOWN	N	N	N	Y	Y	215.4	89.47
TBIG013790	ENSRNOG00000015275.L01	Ska1	spindle and kinetochore associated complex subunit 1 [Source:RGD Symbol;Acc:1310784]	3.05	0.347	-3.14	0.0187	0.55084	yes	DOWN	N	N	N	Y	Y	3.07	0.35
TBIG028655	ENSRNOG00000009945.L01	Pls1	plastin 1 [Source:RGD Symbol;Acc:1307142]	23.2	9.68	-1.26	0.0187	0.55084	yes	DOWN	N	N	N	Y	Y	23.28	9.64
TBIG001331	ENSRNOG00000021203.L01	Atl3	atlastin GTPase 3 [Source:RGD Symbol;Acc:1309871]	35.7	15.2	-1.23	0.01885	0.554541	yes	DOWN	N	N	N	Y	Y	35.91	15.14
TBIG025381	XLOC_025381	-	-	16.7	2.42	-2.78	0.01895	0.556763	yes	DOWN	N	N	N	Y	Y	16.78	2.41
TBIG027921	XLOC_027921	Myo5a	Unconventional myosin-Va [Source:SWISS;Acc:Q9QYF3]	20.9	8.82	-1.24	0.01905	0.55898	yes	DOWN	N	N	N	Y	Y	20.96	8.78
TBIG005065	ENSRNOG00000047367.L01	Card14	caspase recruitment domain family, member 14 [Source:RGD Symbol;Acc:1591135]	21.5	7.92	-1.44	0.01925	0.562673	yes	DOWN	N	N	N	Y	Y	21.59	7.88
TBIG021031	ENSRNOG00000021401.L01	Lpar5	lysophosphatidic acid receptor 5 [Source:RGD Symbol;Acc:1562580]	7.25	1.29	-2.49	0.0194	0.564882	yes	DOWN	N	N	N	Y	Y	7.29	1.28
TBIG016115	ENSRNOG00000010124.L01	Trim2	tripartite motif-containing 2 [Source:RGD Symbol;Acc:1310981]	17.3	6.93	-1.32	0.01945	0.564893	yes	DOWN	N	N	N	Y	Y	17.42	6.9
TBIG009423	ENSRNOG00000001960.L01	Sult1d1	sulfotransferase family 1D, member 1 [Source:RGD Symbol;Acc:620491]	15.3	5.47	-1.48	0.0195	0.565624	yes	DOWN	N	N	N	Y	Y	15.35	5.45
TBIG011663	ENSRNOG00000024650	Ckap2	cytoskeleton associated protein 2 [Source:RGD Symbol;Acc:1311631]	6.71	1.64	-2.03	0.0198	0.57214	yes	DOWN	N	N	N	Y	Y	6.74	1.63
TBIG015427	ENSRNOG00000009314.L01	Ivl	involucrin [Source:RGD Symbol;Acc:620141]	2.04	0.296	-2.79	0.0199	0.5743	yes	DOWN	N	N	N	Y	Y	2.05	0.29
TBIG009802	ENSRNOG00000010996.L02	Mob1b	MOB kinase activator 1B [Source:RGD Symbol;Acc:1305114]	19.6	8.17	-1.26	0.01995	0.575015	yes	DOWN	N	N	N	Y	Y	19.73	8.13
TBIG001300	ENSRNOG00000020784	Kcnk7	potassium channel, subfamily K, member 7 [Source:RGD Symbol;Acc:1565025]	14	2.81	-2.32	0.02	0.575727	yes	DOWN	N	N	N	Y	Y	14.11	2.8
TBIG024670	ENSRNOG00000012843.L01	Aspg	asparaginase [Source:RGD Symbol;Acc:708388]	7.89	1.93	-2.03	0.02015	0.579313	yes	DOWN	N	N	N	Y	Y	7.92	1.92
TBIG003155	ENSRNOG00000015030.L01	Tjp2	tight junction protein 2 [Source:RGD Symbol;Acc:619807]	34.9	15.6	-1.16	0.02025	0.581453	yes	DOWN	N	N	N	Y	Y	35.04	15.5
TBIG010409	ENSRNOG00000009785	Cdkn3	cyclin-dependent kinase inhibitor 3 [Source:RGD Symbol;Acc:1307781]	10.7	1.56	-2.78	0.0204	0.583553	yes	DOWN	N	N	N	Y	Y	10.78	1.56
TBIG017225	ENSRNOG00000000632.L01	Cdk1	cyclin-dependent kinase 1 [Source:RGD Symbol;Acc:2319]	16.2	4.22	-1.94	0.02045	0.584212	yes	DOWN	N	N	N	Y	Y	16.31	4.2
TBIG022708	ENSRNOG00000014259.L01	Mycl	v-myc avian myelocytomatosis viral oncogene lung carcinoma derived homolog [Source:RGD Symbol;Acc:1588591]	16.2	6.23	-1.38	0.0205	0.584212	yes	DOWN	N	N	N	Y	Y	16.3	6.2
TBIG016046	ENSRNOG00000013894.L01	Gpr87	G protein-coupled receptor 87 [Source:RGD Symbol;Acc:1307852]	22.3	7.63	-1.55	0.02055	0.584904	yes	DOWN	N	N	N	Y	Y	22.45	7.6
TBIG015513	ENSRNOG00000023851.L01	Igsf3	immunoglobulin superfamily, member 3 [Source:RGD Symbol;Acc:1307796]	6.15	2.41	-1.35	0.02065	0.587017	yes	DOWN	N	N	N	Y	Y	6.18	2.4
TBIG015279	ENSRNOG00000011238.L01	Tiparp	TCDD-inducible poly(ADP-ribose) polymerase [Source:RGD Symbol;Acc:1306171]	19.9	8.75	-1.18	0.02075	0.589124	yes	DOWN	N	N	N	Y	Y	19.99	8.71
TBIG011482	ENSRNOG00000017156.L01	Ankle1	ankyrin repeat and LEM domain containing 1 [Source:RGD Symbol;Acc:1308184]	5.3	1.47	-1.85	0.02085	0.589706	yes	DOWN	N	N	N	Y	Y	5.32	1.46
TBIG012887	ENSRNOG00000016690.L01	Idi1	isopentenyl-diphosphate delta isomerase 1 [Source:RGD Symbol;Acc:621835]	12.8	4.56	-1.48	0.0209	0.589706	yes	DOWN	N	N	N	Y	Y	12.83	4.54
TBIG022294	ENSRNOG00000005655.L01	Cpa6	carboxypeptidase A6 [Source:RGD Symbol;Acc:1311764]	3.91	0.597	-2.71	0.0209	0.589706	yes	DOWN	N	N	N	Y	Y	3.93	0.59
TBIG029861	ENSRNOG00000011517.L01	Tnfrsf21	tumor necrosis factor receptor superfamily, member 21 [Source:RGD Symbol;Acc:1307308]	40.4	18	-1.16	0.0211	0.59191	yes	DOWN	N	N	N	Y	Y	40.63	17.96
TBIG031357	ENSRNOG00000018187	LOC100909901	rac GTPase-activating protein 1-like [Source:RGD Symbol;Acc:6501444]	4.57	0.933	-2.29	0.0211	0.59191	yes	DOWN	N	N	N	Y	Y	4.59	0.93
TBIG020567	ENSRNOG00000009734.L01	Akr1b8	aldo-keto reductase family 1, member B8 [Source:RGD Symbol;Acc:708475]	51.8	17.1	-1.6	0.0212	0.59191	yes	DOWN	N	N	N	Y	Y	52.08	16.98
TBIG009438	ENSRNOG00000022255.L01	Tmprss11e	transmembrane protease, serine 11e [Source:RGD Symbol;Acc:1561698]	2.82	0.653	-2.11	0.0214	0.59191	yes	DOWN	N	N	N	Y	Y	2.83	0.65
TBIG031248	ENSRNOG00000037845.L01	Cysltr1	cysteinyl leukotriene receptor 1 [Source:RGD Symbol;Acc:619796]	2.85	0.731	-1.96	0.0214	0.59191	yes	DOWN	N	N	N	Y	Y	2.87	0.73
TBIG005716	XLOC_005716	ANKFN1	Ankyrin repeat and fibronectin type-III domain-containing protein 1 [Source:SWISS;Acc:Q8N957]	4.58	1.21	-1.92	0.02145	0.59191	yes	DOWN	N	N	N	Y	Y	4.6	1.21
TBIG021449	ENSRNOG00000007740.L01	Tacstd2	tumor-associated calcium signal transducer 2 [Source:RGD Symbol;Acc:1359498]	200	84.3	-1.25	0.02155	0.59191	yes	DOWN	N	N	N	Y	Y	200.85	83.91
TBIG013682	ENSRNOG00000048800.L01	Nr3c1	nuclear receptor subfamily 3, group C, member 1 [Source:RGD Symbol;Acc:2741]	25.1	9.57	-1.39	0.02165	0.593226	yes	DOWN	N	N	N	Y	Y	25.23	9.52
TBIG026047	ENSRNOG00000005887.L01	Psca	prostate stem cell antigen [Source:RGD Symbol;Acc:1594221]	143	49.5	-1.53	0.02165	0.593226	yes	DOWN	N	N	N	Y	Y	143.33	49.31
TBIG001664	ENSRNOG00000023549.L01	Samd5	sterile alpha motif domain containing 5 [Source:RGD Symbol;Acc:1311012]	7.48	2.46	-1.6	0.02175	0.595249	yes	DOWN	N	N	N	Y	Y	7.52	2.45
TBIG011626	XLOC_011626	Rab11fip1	Rab11 family-interacting protein 1 [Source:SWISS;Acc:Q9D620]	30.8	8.74	-1.82	0.02205	0.599782	yes	DOWN	N	N	N	Y	Y	31	8.69
TBIG003447	XLOC_003447	-	-	14.8	0	#NAME?	0.0221	0.599782	yes	DOWN	N	N	N	Y	Y	14.91	0
TBIG002016	ENSRNOG00000018405	Apoc4	apolipoprotein C-IV [Source:RGD Symbol;Acc:70959]	0.955	0	#NAME?	0.0221	0.599782	yes	DOWN	N	N	N	Y	Y	0.96	0
TBIG012009	ENSRNOG00000013939	Defb4	defensin beta 4 [Source:RGD Symbol;Acc:619944]	1.69	0	#NAME?	0.0221	0.599782	yes	DOWN	N	N	N	Y	Y	1.69	0
TBIG012513	ENSRNOG00000046900	Hist1h4b	histone cluster 1, H4b [Source:RGD Symbol;Acc:620814]	3.47	0	#NAME?	0.0221	0.599782	yes	DOWN	N	N	N	Y	Y	3.49	0
TBIG028162	ENSRNOG00000000221.L01	Abhd5	abhydrolase domain containing 5 [Source:RGD Symbol;Acc:1303237]	30.7	12.7	-1.27	0.0221	0.599782	yes	DOWN	N	N	N	Y	Y	30.85	12.64
TBIG024504	ENSRNOG00000009344.L01	Syt16	synaptotagmin XVI [Source:RGD Symbol;Acc:1564654]	10.7	3.74	-1.52	0.02235	0.604406	yes	DOWN	N	N	N	Y	Y	10.79	3.72
TBIG007508	ENSRNOG00000001427.L01	Orai2	ORAI calcium release-activated calcium modulator 2 [Source:RGD Symbol;Acc:1310213]	9.03	3.38	-1.42	0.02255	0.608903	yes	DOWN	N	N	N	Y	Y	9.07	3.36
TBIG000096	ENSRNOG00000016103.L01	Nkd2	naked cuticle homolog 2 (Drosophila) [Source:RGD Symbol;Acc:1311459]	9.06	3.46	-1.39	0.0226	0.608903	yes	DOWN	N	N	N	Y	Y	9.1	3.45
TBIG001554	ENSRNOG00000046005	LOC100912469	acyl-CoA desaturase 2-like [Source:RGD Symbol;Acc:6486472]	98.2	41.7	-1.23	0.02265	0.608903	yes	DOWN	N	N	N	Y	Y	98.65	41.51
TBIG022635	XLOC_022635	Skint2	Selection and upkeep of intraepithelial T-cells protein 2 [Source:SWISS;Acc:A7XUX6]	8.95	1.63	-2.46	0.02265	0.608903	yes	DOWN	N	N	N	Y	Y	8.99	1.62
TBIG005834	ENSRNOG00000014441	Krt16	keratin 16 [Source:RGD Symbol;Acc:1590901]	11.3	0.459	-4.62	0.02275	0.61087	yes	DOWN	N	N	N	Y	Y	11.3	0.46
TBIG001267	ENSRNOG00000019564.L01	Sptbn2	spectrin, beta, non-erythrocytic 2 [Source:RGD Symbol;Acc:3751]	16.6	7.21	-1.2	0.02305	0.617469	yes	DOWN	N	N	N	Y	Y	16.66	7.17
TBIG029748	ENSRNOG00000037227.L01	Yes1	Yamaguchi sarcoma viral (v-yes) oncogene homolog 1 [Source:RGD Symbol;Acc:3977]	21.6	9.07	-1.25	0.02315	0.619419	yes	DOWN	N	N	N	Y	Y	21.71	9.03
TBIG029405	ENSRNOG00000012920.L01	Col9a1	collagen, type IX, alpha 1 [Source:RGD Symbol;Acc:1309425]	6.63	0.197	-5.07	0.0232	0.620028	yes	DOWN	N	N	N	Y	Y	6.66	0.2
TBIG010925	ENSRNOG00000020136.L01	Tgm1	transglutaminase 1 [Source:RGD Symbol;Acc:61838]	44.6	20.4	-1.13	0.02355	0.628644	yes	DOWN	N	N	N	Y	Y	44.83	20.34
TBIG004642	ENSRNOG00000015210.L01	Ggt6	gamma-glutamyl transferase 6 [Source:RGD Symbol;Acc:1303335]	5.87	0.643	-3.19	0.0237	0.631168	yes	DOWN	N	N	N	Y	Y	5.89	0.64
TBIG015004	ENSRNOG00000010701.L01	Depdc1b	DEP domain containing 1B [Source:RGD Symbol;Acc:1305799]	2.26	0.35	-2.69	0.0238	0.633091	yes	DOWN	N	N	N	Y	Y	2.27	0.35
TBIG030151	ENSRNOG00000034177.L01	Efna5	ephrin A5 [Source:RGD Symbol;Acc:620391]	6.26	1.97	-1.67	0.02455	0.648496	yes	DOWN	N	N	N	Y	Y	6.29	1.96
TBIG009374	ENSRNOG00000002217.L01	Plac8	placenta-specific 8 [Source:RGD Symbol;Acc:1308102]	98.2	40.8	-1.27	0.02465	0.64963	yes	DOWN	N	N	N	Y	Y	98.7	40.63
TBIG027929	ENSRNOG00000010917.L01	Bmp5	bone morphogenetic protein 5 [Source:RGD Symbol;Acc:1305979]	7.74	2.7	-1.52	0.0247	0.650195	yes	DOWN	N	N	N	Y	Y	7.78	2.69
TBIG001688	ENSRNOG00000011409	Hebp2	heme binding protein 2 [Source:RGD Symbol;Acc:1311553]	36.5	14.6	-1.32	0.02475	0.650759	yes	DOWN	N	N	N	Y	Y	36.68	14.54
TBIG011432	ENSRNOG00000020270.L01	Anxa8	annexin A8 [Source:RGD Symbol;Acc:1307719]	276	114	-1.27	0.02485	0.650945	yes	DOWN	N	N	N	Y	Y	276.82	113.91
TBIG002479	ENSRNOG00000036866.L01	Acer3	alkaline ceramidase 3 [Source:RGD Symbol;Acc:1561254]	33.6	10.6	-1.67	0.0249	0.650945	yes	DOWN	N	N	N	Y	Y	33.79	10.5
TBIG023416	ENSRNOG00000028415	Cdc20	cell division cycle 20 [Source:RGD Symbol;Acc:620477]	10.7	3.29	-1.7	0.0249	0.650945	yes	DOWN	N	N	N	Y	Y	10.78	3.28
TBIG010636	ENSRNOG00000017828.L01	Egr3	early growth response 3 [Source:RGD Symbol;Acc:2545]	3.11	0.354	-3.14	0.025	0.651316	yes	DOWN	N	N	N	Y	Y	3.13	0.35
TBIG015715	ENSRNOG00000009503.L01	Depdc1	DEP domain containing 1 [Source:RGD Symbol;Acc:1306987]	3.87	0.572	-2.76	0.025	0.651316	yes	DOWN	N	N	N	Y	Y	3.89	0.57
TBIG003140	ENSRNOG00000017469.L01	Anxa1	annexin A1 [Source:RGD Symbol;Acc:2118]	1170	383	-1.62	0.0251	0.651684	yes	DOWN	N	N	N	Y	Y	1179.65	381.29
TBIG011372	XLOC_011372	-	-	11.1	3.85	-1.52	0.0251	0.651684	yes	DOWN	N	N	N	Y	Y	11.12	3.83
TBIG026504	ENSRNOG00000008885.L01	Chst11	carbohydrate (chondroitin 4) sulfotransferase 11 [Source:RGD Symbol;Acc:1308400]	6.49	2.01	-1.69	0.0252	0.652792	yes	DOWN	N	N	N	Y	Y	6.52	2
TBIG030180	ENSRNOG00000013727.L01	Ndc80	NDC80 kinetochore complex component [Source:RGD Symbol;Acc:1310154]	4.45	0.919	-2.27	0.0252	0.652792	yes	DOWN	N	N	N	Y	Y	4.47	0.91
TBIG031421	ENSRNOG00000002487.L01	Mbnl3	muscleblind-like splicing regulator 3 [Source:RGD Symbol;Acc:1565834]	10.3	4.46	-1.2	0.0253	0.653894	yes	DOWN	N	N	N	Y	Y	10.32	4.44
TBIG027599	ENSRNOG00000009946.L01	Ldlr	low density lipoprotein receptor [Source:RGD Symbol;Acc:2998]	29.6	13.6	-1.12	0.02535	0.654444	yes	DOWN	N	N	N	Y	Y	29.77	13.56
TBIG005630	ENSRNOG00000011777	Spag5	sperm associated antigen 5 [Source:RGD Symbol;Acc:620152]	3.5	0.912	-1.94	0.02565	0.660691	yes	DOWN	N	N	N	Y	Y	3.51	0.91
TBIG008727	XLOC_008727	-	-	5.82	0.982	-2.57	0.02575	0.661769	yes	DOWN	N	N	N	Y	Y	5.85	0.98
TBIG030018	ENSRNOG00000027430.L01	Ikzf2	IKAROS family zinc finger 2 [Source:RGD Symbol;Acc:1308686]	32.6	14.8	-1.14	0.026	0.667441	yes	DOWN	N	N	N	Y	Y	32.76	14.77
TBIG020432	ENSRNOG00000023449.L01	Atg9b	autophagy related 9B [Source:RGD Symbol;Acc:1560887]	2.79	0.27	-3.37	0.0265	0.677983	yes	DOWN	N	N	N	Y	Y	2.81	0.27
TBIG030935	ENSRNOG00000027520.L01	Pls3	plastin 3 [Source:RGD Symbol;Acc:621409]	107	47.3	-1.17	0.0266	0.679778	yes	DOWN	N	N	N	Y	Y	107.19	47.08
TBIG013533	ENSRNOG00000014104.L01	Myo5b	myosin Vb [Source:RGD Symbol;Acc:621347]	9.77	4.4	-1.15	0.02665	0.680292	yes	DOWN	N	N	N	Y	Y	9.82	4.38
TBIG014050	ENSRNOG00000013481	Cdh11	cadherin 11 [Source:RGD Symbol;Acc:619742]	12.4	5.26	-1.24	0.02685	0.681835	yes	DOWN	N	N	N	Y	Y	12.44	5.24
TBIG028464	ENSRNOG00000024230.L01	Tnfaip8l3	tumor necrosis factor, alpha-induced protein 8-like 3 [Source:RGD Symbol;Acc:1311533]	6.22	1.61	-1.95	0.02685	0.681835	yes	DOWN	N	N	N	Y	Y	6.25	1.6
TBIG015521	ENSRNOG00000023079.L01	Nras	neuroblastoma ras oncogene [Source:RGD Symbol;Acc:3205]	27.5	12.2	-1.18	0.0269	0.681835	yes	DOWN	N	N	N	Y	Y	27.62	12.11
TBIG000378	ENSRNOG00000037931.L01	Plaur	plasminogen activator, urokinase receptor [Source:RGD Symbol;Acc:620597]	19.1	5.24	-1.86	0.02695	0.681835	yes	DOWN	N	N	N	Y	Y	19.14	5.21
TBIG006719	ENSRNOG00000001992.L01	Atp6v1a	ATPase, H+ transporting, lysosomal V1 subunit A [Source:RGD Symbol;Acc:1596464]	39.2	18.1	-1.12	0.02695	0.681835	yes	DOWN	N	N	N	Y	Y	39.37	18
TBIG009387	ENSRNOG00000002031.L01	Naa11	N(alpha)-acetyltransferase 11, NatA catalytic subunit [Source:RGD Symbol;Acc:1564723]	1.9	0.295	-2.69	0.0272	0.687396	yes	DOWN	N	N	N	Y	Y	1.91	0.29
TBIG015483	ENSRNOG00000025108.L01	Ankrd35	ankyrin repeat domain 35 [Source:RGD Symbol;Acc:1305527]	6.21	1.96	-1.67	0.02725	0.687896	yes	DOWN	N	N	N	Y	Y	6.23	1.95
TBIG024385	ENSRNOG00000006777.L01	Mboat2	membrane bound O-acyltransferase domain containing 2 [Source:RGD Symbol;Acc:1305798]	5.99	1.7	-1.82	0.0273	0.688395	yes	DOWN	N	N	N	Y	Y	6.02	1.69
TBIG010046	ENSRNOG00000004959.L01	Actr2	ARP2 actin-related protein 2 homolog (yeast) [Source:RGD Symbol;Acc:1310826]	100	45.2	-1.15	0.02745	0.690648	yes	DOWN	N	N	N	Y	Y	100.87	45
TBIG018724	ENSRNOG00000006236.L01	Dsn1	DSN1, MIS12 kinetochore complex component [Source:RGD Symbol;Acc:1565179]	4.21	0.928	-2.18	0.02765	0.694912	yes	DOWN	N	N	N	Y	Y	4.23	0.92
TBIG020998	ENSRNOG00000005599.L01	Cpamd8	C3 and PZP-like, alpha-2-macroglobulin domain containing 8 [Source:EntrezGene;Acc:297572]	3.42	0.0812	-5.4	0.02775	0.695889	yes	DOWN	N	N	N	Y	Y	3.43	0.08
TBIG004637	ENSRNOG00000008040	Fam64a	family with sequence similarity 64, member A [Source:RGD Symbol;Acc:1308747]	5.24	0.858	-2.61	0.02785	0.697629	yes	DOWN	N	N	N	Y	Y	5.27	0.85
TBIG008410	ENSRNOG00000009144	Lad1	ladinin 1 [Source:RGD Symbol;Acc:1310652]	84.8	39.5	-1.1	0.0281	0.700807	yes	DOWN	N	N	N	Y	Y	85.16	39.27
TBIG020611	XLOC_020611	-	-	63.3	11.8	-2.42	0.02815	0.701286	yes	DOWN	N	N	N	Y	Y	63.58	11.79
TBIG005667	ENSRNOG00000030021.L01	Ccl6	chemokine (C-C motif) ligand 6 [Source:RGD Symbol;Acc:1303200]	20.8	7.29	-1.51	0.0286	0.710166	yes	DOWN	N	N	N	Y	Y	20.92	7.26
TBIG010959	ENSRNOG00000008855	Gjb2	gap junction protein, beta 2 [Source:RGD Symbol;Acc:728891]	27.7	12.2	-1.19	0.0288	0.714353	yes	DOWN	N	N	N	Y	Y	27.8	12.09
TBIG029282	ENSRNOG00000047368.L01	Acer1	alkaline ceramidase 1 [Source:RGD Symbol;Acc:1588582]	5.65	1.56	-1.86	0.02895	0.717292	yes	DOWN	N	N	N	Y	Y	5.68	1.55
TBIG027996	XLOC_027996	COPB2	Coatomer subunit beta' [Source:SWISS;Acc:P35605]	634	242	-1.39	0.02915	0.719571	yes	DOWN	N	N	N	Y	Y	636.69	240.61
TBIG021078	ENSRNOG00000047736	Kcna6	potassium voltage gated channel, shaker related subfamily, member 6 [Source:RGD Symbol;Acc:62083]	1.18	0.195	-2.59	0.0292	0.719571	yes	DOWN	N	N	N	Y	Y	1.18	0.19
TBIG015765	ENSRNOG00000018003.L01	F2rl1	coagulation factor II (thrombin) receptor-like 1 [Source:RGD Symbol;Acc:620866]	17.7	7.51	-1.24	0.02925	0.720024	yes	DOWN	N	N	N	Y	Y	17.79	7.48
TBIG005591	ENSRNOG00000003476.L01	Slc6a4	solute carrier family 6 (neurotransmitter transporter), member 4 [Source:RGD Symbol;Acc:3714]	18.8	8.16	-1.2	0.02935	0.72015	yes	DOWN	N	N	N	Y	Y	18.84	8.12
TBIG023006	ENSRNOG00000049052.L01	Sgk3	serum/glucocorticoid regulated kinase family, member 3 [Source:RGD Symbol;Acc:620242]	15.5	6.63	-1.23	0.0295	0.722721	yes	DOWN	N	N	N	Y	Y	15.59	6.6
TBIG010722	ENSRNOG00000023687.L01	Rap2a	RAS related protein 2a [Source:RGD Symbol;Acc:620590]	14.2	4.16	-1.77	0.02955	0.722721	yes	DOWN	N	N	N	Y	Y	14.28	4.14
TBIG029653	ENSRNOG00000016606	RGD1311447	LOC363276 [Source:RGD Symbol;Acc:1311447]	17.9	3.98	-2.17	0.0298	0.727273	yes	DOWN	N	N	N	Y	Y	18.01	3.96
TBIG016291	ENSRNOG00000014479.L01	Cttnbp2nl	CTTNBP2 N-terminal like [Source:RGD Symbol;Acc:1310822]	21.7	10	-1.11	0.0301	0.733024	yes	DOWN	N	N	N	Y	Y	21.76	9.96
TBIG013716	ENSRNOG00000014426.L01	Lox	lysyl oxidase [Source:RGD Symbol;Acc:3015]	7.68	3.03	-1.34	0.0303	0.737106	yes	DOWN	N	N	N	Y	Y	7.72	3.02
TBIG015979	XLOC_015979	-	-	2.52	0.176	-3.84	0.0305	0.741179	yes	DOWN	N	N	N	Y	Y	2.53	0.18
TBIG018545	ENSRNOG00000014710.L01	Prom2	prominin 2 [Source:RGD Symbol;Acc:621435]	45	21.5	-1.07	0.0307	0.745244	yes	DOWN	N	N	N	Y	Y	45.23	21.35
TBIG029314	ENSRNOG00000023351.L01	Daam2	dishevelled associated activator of morphogenesis 2 [Source:RGD Symbol;Acc:1306128]	3.71	1.39	-1.42	0.03075	0.745663	yes	DOWN	N	N	N	Y	Y	3.73	1.38
TBIG021088	ENSRNOG00000008412.L01	Gprc5a	G protein-coupled receptor, class C, group 5, member A [Source:RGD Symbol;Acc:1310804]	164	77.5	-1.08	0.031	0.747403	yes	DOWN	N	N	N	Y	Y	164.66	77.15
TBIG030020	ENSRNOG00000015248.L01	Abca12	ATP-binding cassette, subfamily A (ABC1), member 12 [Source:RGD Symbol;Acc:1304586]	1.12	0.071	-3.98	0.031	0.747403	yes	DOWN	N	N	N	Y	Y	1.12	0.07
TBIG027952	ENSRNOG00000009613.L01	Sh3bgrl2	SH3 domain binding glutamate-rich protein like 2 [Source:RGD Symbol;Acc:1591931]	45.8	21.8	-1.07	0.03105	0.747403	yes	DOWN	N	N	N	Y	Y	46.02	21.72
TBIG026987	XLOC_026987	-	-	2.44	0.745	-1.71	0.0311	0.747403	yes	DOWN	N	N	N	Y	Y	2.45	0.74
TBIG016144	ENSRNOG00000019412.L01	Rhbg	Rh family, B glycoprotein [Source:RGD Symbol;Acc:727813]	18.1	5.84	-1.63	0.03115	0.747403	yes	DOWN	N	N	N	Y	Y	18.16	5.82
TBIG018653	ENSRNOG00000031167.L01	Srxn1	sulfiredoxin 1 [Source:RGD Symbol;Acc:1307332]	16.2	6.71	-1.27	0.03115	0.747403	yes	DOWN	N	N	N	Y	Y	16.23	6.68
TBIG030778	ENSRNOG00000005639.L01	Ar	androgen receptor [Source:RGD Symbol;Acc:2147]	5.43	2.39	-1.18	0.03115	0.747403	yes	DOWN	N	N	N	Y	Y	5.45	2.38
TBIG019689	ENSRNOG00000046772.L01	Fam83c	family with sequence similarity 83, member C [Source:RGD Symbol;Acc:1585687]	5.3	1.84	-1.53	0.03135	0.749831	yes	DOWN	N	N	N	Y	Y	5.33	1.83
TBIG026255	ENSRNOG00000012835.L01	Espl1	extra spindle pole bodies homolog 1 (S. cerevisiae) [Source:RGD Symbol;Acc:1306266]	2.63	0.822	-1.68	0.03135	0.749831	yes	DOWN	N	N	N	Y	Y	2.65	0.82
TBIG023223	ENSRNOG00000016334.L01	Ptbp3	polypyrimidine tract binding protein 3 [Source:RGD Symbol;Acc:621671]	39.5	18.5	-1.09	0.0316	0.754226	yes	DOWN	N	N	N	Y	Y	39.68	18.41
TBIG005268	ENSRNOG00000027606.L01	Neurl1b	neuralized E3 ubiquitin protein ligase 1B [Source:RGD Symbol;Acc:1564984]	3.46	1.23	-1.5	0.0317	0.75503	yes	DOWN	N	N	N	Y	Y	3.48	1.22
TBIG010914	ENSRNOG00000016983.L01	Myh7	myosin, heavy chain 7, cardiac muscle, beta [Source:RGD Symbol;Acc:62030]	1.47	0.0493	-4.9	0.0317	0.75503	yes	DOWN	N	N	N	Y	Y	1.48	0.05
TBIG023605	ENSRNOG00000016798.L01	Pla2g2f	phospholipase A2, group IIF [Source:RGD Symbol;Acc:1597305]	4.07	0.365	-3.48	0.0318	0.756621	yes	DOWN	N	N	N	Y	Y	4.09	0.36
TBIG000035	ENSRNOG00000011994	Perp	PERP, TP53 apoptosis effector [Source:RGD Symbol;Acc:1310294]	505	199	-1.35	0.03195	0.757814	yes	DOWN	N	N	N	Y	Y	507.91	197.77
TBIG021865	ENSRNOG00000001804.L01	Itpr2	inositol 1,4,5-trisphosphate receptor, type 2 [Source:EntrezGene;Acc:81678]	12.7	6.03	-1.08	0.03225	0.763339	yes	DOWN	N	N	N	Y	Y	12.79	6
TBIG021224	ENSRNOG00000009258.L01	Cdk6	cyclin-dependent kinase 6 [Source:RGD Symbol;Acc:621121]	10.3	4.92	-1.06	0.03245	0.765685	yes	DOWN	N	N	N	Y	Y	10.34	4.9
TBIG018510	ENSRNOG00000033348.L01	Duox1	dual oxidase 1 [Source:RGD Symbol;Acc:628760]	56.4	26.5	-1.09	0.0325	0.766071	yes	DOWN	N	N	N	Y	Y	56.72	26.38
TBIG021626	ENSRNOG00000010430.L01	Tmem40	transmembrane protein 40 [Source:RGD Symbol;Acc:1587025]	11.4	3.46	-1.71	0.03285	0.773521	yes	DOWN	N	N	N	Y	Y	11.41	3.44
TBIG028015	ENSRNOG00000009005.L01	Slco2a1	solute carrier organic anion transporter family, member 2a1 [Source:RGD Symbol;Acc:3051]	18.8	8.11	-1.21	0.0329	0.773898	yes	DOWN	N	N	N	Y	Y	18.86	8.07
TBIG000562	ENSRNOG00000018742.L01	Klk11	kallikrein related-peptidase 11 [Source:RGD Symbol;Acc:1308690]	15.3	0.358	-5.42	0.0332	0.777683	yes	DOWN	N	N	N	Y	Y	15.37	0.36
TBIG005890	ENSRNOG00000021713.L01	Kif18b	kinesin family member 18B [Source:RGD Symbol;Acc:1310360]	4.36	1.09	-2	0.0332	0.777683	yes	DOWN	N	N	N	Y	Y	4.38	1.08
TBIG017117	ENSRNOG00000000479	Kifc1	kinesin family member C1 [Source:RGD Symbol;Acc:1359118]	9.7	3.03	-1.68	0.0333	0.777683	yes	DOWN	N	N	N	Y	Y	9.74	3.02
TBIG023186	XLOC_023186	-	-	6	0.352	-4.09	0.0333	0.777683	yes	DOWN	N	N	N	Y	Y	6.03	0.35
TBIG002199	ENSRNOG00000023411.L01	Vsig10l	V-set and immunoglobulin domain containing 10 like [Source:RGD Symbol;Acc:1564982]	10.7	4.63	-1.21	0.0335	0.780752	yes	DOWN	N	N	N	Y	Y	10.79	4.61
TBIG020612	ENSRNOG00000045771.L01	Chl1	cell adhesion molecule L1-like [Source:RGD Symbol;Acc:620122]	11.6	5.46	-1.09	0.0335	0.780752	yes	DOWN	N	N	N	Y	Y	11.66	5.44
TBIG029471	ENSRNOG00000023576.L01	RGD1305645	similar to RIKEN cDNA 1500015O10 [Source:RGD Symbol;Acc:1305645]	39.6	9.48	-2.06	0.0336	0.781414	yes	DOWN	N	N	N	Y	Y	39.79	9.44
TBIG012544	ENSRNOG00000018113	Anlnl1	anillin, actin binding protein-like 1 [Source:RGD Symbol;Acc:1566097]	4.28	0.995	-2.11	0.03365	0.781414	yes	DOWN	N	N	N	Y	Y	4.3	0.99
TBIG015338	XLOC_015338	Sh3d19	SH3 domain-containing protein 19 [Source:SWISS;Acc:Q91X43]	61.5	19.2	-1.68	0.03365	0.781414	yes	DOWN	N	N	N	Y	Y	61.81	19.1
TBIG014219	ENSRNOG00000020129.L01	Cdh3	cadherin 3 [Source:RGD Symbol;Acc:621089]	63.8	25.8	-1.31	0.0337	0.781414	yes	DOWN	N	N	N	Y	Y	64.15	25.71
TBIG025910	ENSRNOG00000026252.L01	E2f7	E2F transcription factor 7 [Source:RGD Symbol;Acc:1310258]	1.55	0.298	-2.37	0.0337	0.781414	yes	DOWN	N	N	N	Y	Y	1.55	0.3
TBIG016024	ENSRNOG00000021670.L01	Frem2	Fras1 related extracellular matrix protein 2 [Source:RGD Symbol;Acc:1566012]	1.04	0.295	-1.82	0.0339	0.783658	yes	DOWN	N	N	N	Y	Y	1.05	0.29
TBIG017493	ENSRNOG00000000522.L01	Cpne5	copine V [Source:RGD Symbol;Acc:1308021]	2.46	0.496	-2.31	0.0339	0.783658	yes	DOWN	N	N	N	Y	Y	2.47	0.49
TBIG010996	ENSRNOG00000015308	Pbk	PDZ binding kinase [Source:RGD Symbol;Acc:1309565]	4	0.691	-2.53	0.0341	0.786684	yes	DOWN	N	N	N	Y	Y	4.02	0.69
TBIG015596	ENSRNOG00000016351.L01	Frrs1	ferric-chelate reductase 1 [Source:RGD Symbol;Acc:1306883]	14.5	5.37	-1.43	0.03425	0.789345	yes	DOWN	N	N	N	Y	Y	14.56	5.34
TBIG001449	ENSRNOG00000016023.L01	Kank1	KN motif and ankyrin repeat domains 1 [Source:RGD Symbol;Acc:1307714]	93.5	38.9	-1.26	0.03445	0.793151	yes	DOWN	N	N	N	Y	Y	93.91	38.74
TBIG028420	ENSRNOG00000026650	Tmprss4	transmembrane protease, serine 4 [Source:RGD Symbol;Acc:1305033]	6.43	1.89	-1.77	0.03465	0.796146	yes	DOWN	N	N	N	Y	Y	6.46	1.88
TBIG015298	ENSRNOG00000010274.L01	Smc4	structural maintenance of chromosomes 4 [Source:RGD Symbol;Acc:1306680]	15.9	6.96	-1.19	0.03475	0.797639	yes	DOWN	N	N	N	Y	Y	15.97	6.93
TBIG024338	ENSRNOG00000006396.L01	Sdc1	syndecan 1 [Source:RGD Symbol;Acc:3648]	289	117	-1.31	0.03485	0.799128	yes	DOWN	N	N	N	Y	Y	290.59	116.36
TBIG008897	ENSRNOG00000002711.L01	Nuf2	NUF2, NDC80 kinetochore complex component [Source:RGD Symbol;Acc:1307952]	6.25	1.43	-2.13	0.03495	0.800615	yes	DOWN	N	N	N	Y	Y	6.28	1.42
TBIG018762	ENSRNOG00000007805.L01	Mybl2	myeloblastosis oncogene-like 2 [Source:RGD Symbol;Acc:1308474]	3.73	0.946	-1.98	0.035	0.800955	yes	DOWN	N	N	N	Y	Y	3.74	0.94
TBIG004552	ENSRNOG00000003219.L01	Trim16	tripartite motif-containing 16 [Source:RGD Symbol;Acc:1309749]	32.6	15.9	-1.04	0.0352	0.801841	yes	DOWN	N	N	N	Y	Y	32.77	15.83
TBIG006713	ENSRNOG00000022136.L01	LOC683549	similar to TPA-induced transmembrane protein [Source:RGD Symbol;Acc:1585645]	4.96	1.21	-2.04	0.03525	0.801841	yes	DOWN	N	N	N	Y	Y	4.98	1.2
TBIG022881	ENSRNOG00000009222	Epha2	Eph receptor A2 [Source:RGD Symbol;Acc:1307204]	45.6	21.8	-1.06	0.03525	0.801841	yes	DOWN	N	N	N	Y	Y	45.77	21.72
TBIG021859	ENSRNOG00000015514.L01	Bcat1	branched chain amino acid transaminase 1, cytosolic [Source:RGD Symbol;Acc:2195]	3.31	0.467	-2.82	0.03555	0.807052	yes	DOWN	N	N	N	Y	Y	3.32	0.47
TBIG028797	ENSRNOG00000032884.L01	Scn11a	sodium channel, voltage-gated, type XI, alpha subunit [Source:RGD Symbol;Acc:3630]	1.13	0.0525	-4.42	0.0357	0.808041	yes	DOWN	N	N	N	Y	Y	1.13	0.05
TBIG015579	ENSRNOG00000020470.L01	Slc25a24	solute carrier family 25 (mitochondrial carrier, phosphate carrier), member 24 [Source:RGD Symbol;Acc:1311982]	19.2	8.85	-1.12	0.0359	0.811761	yes	DOWN	N	N	N	Y	Y	19.32	8.81
TBIG016000	ENSRNOG00000010534.L01	Ankrd50	ankyrin repeat domain 50 [Source:RGD Symbol;Acc:1311665]	11.3	5.23	-1.11	0.03605	0.813537	yes	DOWN	N	N	N	Y	Y	11.35	5.2
TBIG017617	ENSRNOG00000000572.L01	Chst3	carbohydrate (chondroitin 6) sulfotransferase 3 [Source:RGD Symbol;Acc:620355]	4.83	1.69	-1.52	0.0363	0.817558	yes	DOWN	N	N	N	Y	Y	4.86	1.68
TBIG006620	ENSRNOG00000001656.L01	Kcnj15	potassium inwardly-rectifying channel, subfamily J, member 15 [Source:RGD Symbol;Acc:621662]	25.6	9.95	-1.36	0.0364	0.819	yes	DOWN	N	N	N	Y	Y	25.75	9.91
TBIG010546	ENSRNOG00000020382.L01	Ltb4r2	leukotriene B4 receptor 2 [Source:RGD Symbol;Acc:621029]	8.15	2.43	-1.74	0.0365	0.81963	yes	DOWN	N	N	N	Y	Y	8.19	2.42
TBIG005963	ENSRNOG00000024711.L01	Sdk2	sidekick cell adhesion molecule 2 [Source:RGD Symbol;Acc:1310397]	1.17	0.297	-1.98	0.0366	0.820258	yes	DOWN	N	N	N	Y	Y	1.18	0.3
TBIG014533	XLOC_014533	Ap1g1	AP-1 complex subunit gamma-1 [Source:SWISS;Acc:P22892]	6.04	2.54	-1.25	0.0366	0.820258	yes	DOWN	N	N	N	Y	Y	6.07	2.52
TBIG004986	ENSRNOG00000036745.L01	Gna13	guanine nucleotide binding protein (G protein), alpha 13 [Source:RGD Symbol;Acc:1310221]	23.8	11	-1.11	0.0367	0.820883	yes	DOWN	N	N	N	Y	Y	23.89	10.94
TBIG019716	ENSRNOG00000015794	Fam83d	family with sequence similarity 83, member D [Source:RGD Symbol;Acc:1565583]	3.37	0.841	-2	0.0367	0.820883	yes	DOWN	N	N	N	Y	Y	3.38	0.84
TBIG026446	ENSRNOG00000004346.L01	Notch3	notch 3 [Source:RGD Symbol;Acc:620761]	23	11.4	-1.01	0.03675	0.821195	yes	DOWN	N	N	N	Y	Y	23.15	11.37
TBIG010645	ENSRNOG00000010555.L01	LOC102551958	phytanoyl-CoA hydroxylase-interacting protein-like [Source:RGD Symbol;Acc:7719585]	39.5	19	-1.06	0.0369	0.823738	yes	DOWN	N	N	N	Y	Y	39.69	18.9
TBIG020475	ENSRNOG00000007234	Cyp51	cytochrome P450, family 51 [Source:RGD Symbol;Acc:2481]	28.9	13.7	-1.08	0.03715	0.827696	yes	DOWN	N	N	N	Y	Y	29.07	13.62
TBIG022378	ENSRNOG00000006170.L01	Bach2	BTB and CNC homology 1, basic leucine zipper transcription factor 2 [Source:RGD Symbol;Acc:1562865]	3.68	1.46	-1.33	0.03725	0.828403	yes	DOWN	N	N	N	Y	Y	3.7	1.45
TBIG015359	ENSRNOG00000027894.L01	Iqgap3	IQ motif containing GTPase activating protein 3 [Source:RGD Symbol;Acc:1305951]	3.59	1.26	-1.51	0.0373	0.828403	yes	DOWN	N	N	N	Y	Y	3.61	1.26
TBIG000165	ENSRNOG00000014434.L01	Chd1	chromodomain helicase DNA binding protein 1 [Source:RGD Symbol;Acc:1306794]	13.7	6.53	-1.07	0.0374	0.828403	yes	DOWN	N	N	N	Y	Y	13.79	6.5
TBIG010977	ENSRNOG00000014265.L01	Tnfrsf19	tumor necrosis factor receptor superfamily, member 19 [Source:RGD Symbol;Acc:1564996]	16.4	7.32	-1.16	0.0375	0.829005	yes	DOWN	N	N	N	Y	Y	16.43	7.29
TBIG023197	ENSRNOG00000018126.L01	Abca1	ATP-binding cassette, subfamily A (ABC1), member 1 [Source:RGD Symbol;Acc:631344]	5.91	2.61	-1.18	0.0377	0.832618	yes	DOWN	N	N	N	Y	Y	5.94	2.6
TBIG016325	ENSRNOG00000019465	Gnai3	guanine nucleotide binding protein (G protein), alpha inhibiting activity polypeptide 3 [Source:RGD Symbol;Acc:2714]	62.3	30.3	-1.04	0.03785	0.833505	yes	DOWN	N	N	N	Y	Y	62.59	30.15
TBIG030054	ENSRNOG00000013213	Epha4	Eph receptor A4 [Source:RGD Symbol;Acc:1560587]	6.1	2.66	-1.2	0.03785	0.833505	yes	DOWN	N	N	N	Y	Y	6.13	2.65
TBIG021316	ENSRNOG00000026919.L01	RGD1565367	similar to Solute carrier family 23, member 2 (Sodium-dependent vitamin C transporter 2) [Source:RGD Symbol;Acc:1565367]	13.4	5.4	-1.32	0.038	0.834681	yes	DOWN	N	N	N	Y	Y	13.49	5.37
TBIG025029	ENSRNOG00000007271.L01	Map3k9	mitogen-activated protein kinase kinase kinase 9 [Source:RGD Symbol;Acc:1562149]	8.24	3.61	-1.19	0.03805	0.834681	yes	DOWN	N	N	N	Y	Y	8.28	3.6
TBIG017421	ENSRNOG00000050215	LOC682408	similar to corneodesmosin [Source:RGD Symbol;Acc:1583483]	25.3	9.63	-1.39	0.03825	0.837454	yes	DOWN	N	N	N	Y	Y	25.46	9.59
TBIG014129	ENSRNOG00000005115	Asf1b	anti-silencing function 1B histone chaperone [Source:RGD Symbol;Acc:1304918]	4.35	0.801	-2.44	0.0383	0.837744	yes	DOWN	N	N	N	Y	Y	4.37	0.8
TBIG030019	ENSRNOG00000014960.L01	Bard1	BRCA1 associated RING domain 1 [Source:RGD Symbol;Acc:621072]	1.85	0.454	-2.03	0.03845	0.840217	yes	DOWN	N	N	N	Y	Y	1.86	0.45
TBIG000303	ENSRNOG00000042461.L01	Pla2g4c	phospholipase A2, group IVC [Source:RGD Symbol;Acc:1594655]	95.7	44	-1.12	0.039	0.849789	yes	DOWN	N	N	N	Y	Y	96.19	43.76
TBIG015330	ENSRNOG00000010741.L01	Tigd4	tigger transposable element derived 4 [Source:RGD Symbol;Acc:1305780]	2	0.486	-2.04	0.0391	0.851154	yes	DOWN	N	N	N	Y	Y	2.01	0.48
TBIG016212	ENSRNOG00000020923.L01	Tuft1	tuftelin 1 [Source:RGD Symbol;Acc:1310373]	42.9	20.4	-1.07	0.0394	0.856865	yes	DOWN	N	N	N	Y	Y	43.09	20.27
TBIG006745	ENSRNOG00000023953	Csta	cystatin A (stefin A) [Source:RGD Symbol;Acc:1309603]	26.1	2.4	-3.44	0.03955	0.858488	yes	DOWN	N	N	N	Y	Y	26.19	2.39
TBIG007012	XLOC_007012	MYH15	Myosin-15 [Source:SWISS;Acc:Q9Y2K3]	1.83	0.157	-3.55	0.0397	0.858736	yes	DOWN	N	N	N	Y	Y	1.84	0.16
TBIG009863	ENSRNOG00000002312.L01	Atp10d	ATPase, class V, type 10D [Source:RGD Symbol;Acc:1588541]	14.2	6.79	-1.07	0.03975	0.858736	yes	DOWN	N	N	N	Y	Y	14.29	6.76
TBIG024508	ENSRNOG00000005220.L01	Syne2	spectrin repeat containing, nuclear envelope 2 [Source:RGD Symbol;Acc:1305248]	14.4	7.17	-1.01	0.03975	0.858736	yes	DOWN	N	N	N	Y	Y	14.49	7.13
TBIG001509	ENSRNOG00000016377.L01	Cep55	centrosomal protein 55 [Source:RGD Symbol;Acc:1305340]	3.9	0.974	-2	0.03985	0.859266	yes	DOWN	N	N	N	Y	Y	3.92	0.97
TBIG026021	ENSRNOG00000025604.L01	Atad2	ATPase family, AAA domain containing 2 [Source:RGD Symbol;Acc:1304849]	8.29	3.72	-1.15	0.03995	0.860607	yes	DOWN	N	N	N	Y	Y	8.33	3.71
TBIG011096	XLOC_011096	MYCBP2	Probable E3 ubiquitin-protein ligase MYCBP2 [Source:SWISS;Acc:O75592]	200	36.3	-2.46	0.0404	0.868657	yes	DOWN	N	N	N	Y	Y	200.47	36.17
TBIG014233	ENSRNOG00000016953.L01	Chst4	carbohydrate (N-acetylglucosamine 6-O) sulfotransferase 4 [Source:RGD Symbol;Acc:1310798]	6.4	2.23	-1.52	0.04125	0.881109	yes	DOWN	N	N	N	Y	Y	6.43	2.22
TBIG028532	ENSRNOG00000025372.L01	Glce	glucuronic acid epimerase [Source:RGD Symbol;Acc:1565253]	18.9	9.09	-1.06	0.04125	0.881109	yes	DOWN	N	N	N	Y	Y	19.02	9.05
TBIG010760	ENSRNOG00000006649.L01	Thrb	thyroid hormone receptor beta [Source:RGD Symbol;Acc:3858]	8.59	4.01	-1.1	0.04135	0.881591	yes	DOWN	N	N	N	Y	Y	8.63	3.99
TBIG006911	ENSRNOG00000001607	Adamts1	ADAM metallopeptidase with thrombospondin type 1 motif, 1 [Source:RGD Symbol;Acc:621241]	29.8	14.9	-1	0.04185	0.891417	yes	DOWN	N	N	N	Y	N	29.98	14.85
TBIG007049	ENSRNOG00000027380.L01	Upk1b	uroplakin 1B [Source:RGD Symbol;Acc:1307806]	247	115	-1.1	0.04195	0.891507	yes	DOWN	N	N	N	Y	Y	248.38	114.4
TBIG028386	ENSRNOG00000008305.L01	Sc5d	sterol-C5-desaturase [Source:RGD Symbol;Acc:620775]	27.6	12.7	-1.12	0.04205	0.891507	yes	DOWN	N	N	N	Y	Y	27.77	12.64
TBIG022370	ENSRNOG00000006996	Mms22l	MMS22-like, DNA repair protein [Source:RGD Symbol;Acc:1304693]	1.43	0.27	-2.41	0.0423	0.89514	yes	DOWN	N	N	N	Y	Y	1.44	0.27
TBIG027789	ENSRNOG00000025115.L01	Exph5	exophilin 5 [Source:RGD Symbol;Acc:1560308]	11.6	5.57	-1.05	0.0423	0.89514	yes	DOWN	N	N	N	Y	Y	11.63	5.55
TBIG020886	ENSRNOG00000012364.L01	Prickle2	prickle homolog 2 (Drosophila) [Source:RGD Symbol;Acc:1306723]	4.33	1.82	-1.25	0.04285	0.905097	yes	DOWN	N	N	N	Y	Y	4.36	1.82
TBIG005932	ENSRNOG00000015329	Kpna2	karyopherin alpha 2 [Source:RGD Symbol;Acc:621419]	27.8	12.5	-1.15	0.043	0.906583	yes	DOWN	N	N	N	Y	Y	27.92	12.44
TBIG026039	ENSRNOG00000007078.L01	Wisp1	WNT1 inducible signaling pathway protein 1 [Source:RGD Symbol;Acc:69431]	1.36	0.321	-2.09	0.043	0.906583	yes	DOWN	N	N	N	Y	Y	1.37	0.32
TBIG009404	ENSRNOG00000002282.L01	Ppef2	protein phosphatase, EF hand calcium-binding domain 2 [Source:RGD Symbol;Acc:1307093]	2.7	0.586	-2.2	0.04305	0.906798	yes	DOWN	N	N	N	Y	Y	2.71	0.58
TBIG018539	ENSRNOG00000032778.L01	Bub1	BUB1 mitotic checkpoint serine/threonine kinase [Source:RGD Symbol;Acc:1311707]	5.67	1.91	-1.57	0.04325	0.908489	yes	DOWN	N	N	N	Y	Y	5.7	1.9
TBIG001857	ENSRNOG00000016588	Myadm	myeloid-associated differentiation marker [Source:RGD Symbol;Acc:727835]	137	65.5	-1.07	0.0435	0.910381	yes	DOWN	N	N	N	Y	Y	138.15	65.25
TBIG009726	ENSRNOG00000002105.L01	Cdc7	cell division cycle 7 [Source:RGD Symbol;Acc:1308351]	3.14	0.722	-2.12	0.0435	0.910381	yes	DOWN	N	N	N	Y	Y	3.15	0.72
TBIG021637	ENSRNOG00000007909	Cd69	Cd69 molecule [Source:RGD Symbol;Acc:61318]	11.9	3.61	-1.72	0.04375	0.913302	yes	DOWN	N	N	N	Y	Y	11.98	3.6
TBIG019604	ENSRNOG00000036964.L01	Ralgapa2	Ral GTPase activating protein, alpha subunit 2 (catalytic) [Source:RGD Symbol;Acc:1308023]	11.7	5.84	-1.01	0.04415	0.918917	yes	DOWN	N	N	N	Y	Y	11.78	5.81
TBIG010966	ENSRNOG00000011024.L01	Zdhhc20	zinc finger, DHHC-type containing 20 [Source:RGD Symbol;Acc:1305755]	21.4	10.5	-1.03	0.0442	0.919118	yes	DOWN	N	N	N	Y	Y	21.49	10.45
TBIG004359	ENSRNOG00000005465.L01	Kcnmb1	potassium large conductance calcium-activated channel, subfamily M, beta member 1 [Source:RGD Symbol;Acc:2961]	1.42	0.144	-3.3	0.0443	0.919518	yes	DOWN	N	N	N	Y	Y	1.42	0.14
TBIG006783	ENSRNOG00000001714.L01	Atp13a4	ATPase type 13A4 [Source:RGD Symbol;Acc:1306927]	18.2	8.83	-1.05	0.04435	0.919717	yes	DOWN	N	N	N	Y	Y	18.33	8.78
TBIG016335	ENSRNOG00000012149.L01	Gpsm2	G-protein signaling modulator 2 [Source:RGD Symbol;Acc:1560967]	11.9	5.23	-1.18	0.04465	0.921741	yes	DOWN	N	N	N	Y	Y	11.91	5.2
TBIG013528	ENSRNOG00000015777.L01	Mex3c	mex-3 RNA binding family member C [Source:RGD Symbol;Acc:1309023]	26.1	12.8	-1.03	0.04475	0.922329	yes	DOWN	N	N	N	Y	Y	26.26	12.7
TBIG012617	ENSRNOG00000002624.L01	Edaradd	EDAR-associated death domain [Source:RGD Symbol;Acc:1564010]	19.3	8.57	-1.17	0.0448	0.922329	yes	DOWN	N	N	N	Y	Y	19.44	8.53
TBIG015109	XLOC_015109	Ctnnd2	Catenin delta-2 [Source:SWISS;Acc:O35927]	8.67	3.15	-1.46	0.0448	0.922329	yes	DOWN	N	N	N	Y	Y	8.71	3.14
TBIG000094	ENSRNOG00000015465.L01	Cep72	centrosomal protein 72 [Source:RGD Symbol;Acc:1566336]	2.67	0.672	-1.99	0.04495	0.923747	yes	DOWN	N	N	N	Y	Y	2.68	0.67
TBIG010568	ENSRNOG00000051196.L01	Parp4	poly (ADP-ribose) polymerase family, member 4 [Source:RGD Symbol;Acc:1310524]	17	7.89	-1.11	0.04495	0.923747	yes	DOWN	N	N	N	Y	Y	17.11	7.85
TBIG012697	ENSRNOG00000014130	LOC100362620	CDC28 protein kinase regulatory subunit 2 [Source:RGD Symbol;Acc:2324338]	26.9	7.17	-1.91	0.045	0.92394	yes	DOWN	N	N	N	Y	Y	27.05	7.14
TBIG028597	ENSRNOG00000032436.L01	Tmod3	tropomodulin 3 [Source:RGD Symbol;Acc:1311030]	96.3	45.7	-1.07	0.04545	0.9315	yes	DOWN	N	N	N	Y	Y	96.8	45.53
TBIG010438	ENSRNOG00000030694	Rnase1l2	ribonuclease, RNase A family, 1-like 2 (pancreatic) [Source:RGD Symbol;Acc:1565230]	7.59	0.473	-4	0.04595	0.940055	yes	DOWN	N	N	N	Y	Y	7.63	0.47
TBIG024712	ENSRNOG00000037436.L01	Macc1	metastasis associated in colon cancer 1 [Source:RGD Symbol;Acc:1309838]	4.73	1.74	-1.45	0.04595	0.940055	yes	DOWN	N	N	N	Y	Y	4.75	1.73
TBIG003189	ENSRNOG00000019190.L01	Ankrd22	ankyrin repeat domain 22 [Source:RGD Symbol;Acc:1307862]	23.5	9.05	-1.38	0.0468	0.951461	yes	DOWN	N	N	N	Y	Y	23.64	9.01
TBIG028531	ENSRNOG00000014164.L01	Paqr5	progestin and adipoQ receptor family member V [Source:RGD Symbol;Acc:1311259]	44.4	22.2	-0.997	0.047	0.952974	yes	DOWN	N	N	N	Y	N	44.59	22.12
TBIG016222	XLOC_016222	Bnipl	Bcl-2/adenovirus E1B 19 kDa-interacting protein 2-like protein [Source:SWISS;Acc:Q99JU7]	25	11.1	-1.17	0.04735	0.957466	yes	DOWN	N	N	N	Y	Y	25.12	11.06
TBIG001253	ENSRNOG00000017872.L01	Aldh3b2	aldehyde dehydrogenase 3 family, member B2 [Source:RGD Symbol;Acc:1584166]	2.86	0.511	-2.49	0.0474	0.957466	yes	DOWN	N	N	N	Y	Y	2.87	0.51
TBIG000154	XLOC_000154	pol	Pol polyprotein [Source:SWISS;Acc:P31792]	4.53	1.77	-1.35	0.0476	0.957466	yes	DOWN	N	N	N	Y	Y	4.56	1.77
TBIG022784	ENSRNOG00000010932	Matn1	matrilin 1, cartilage matrix protein [Source:RGD Symbol;Acc:1359410]	3.52	0.364	-3.27	0.0476	0.957466	yes	DOWN	N	N	N	Y	Y	3.54	0.36
TBIG027744	ENSRNOG00000026753.L01	Mpzl3	myelin protein zero-like 3 [Source:RGD Symbol;Acc:1310980]	8.81	3.81	-1.21	0.0477	0.958631	yes	DOWN	N	N	N	Y	Y	8.86	3.79
TBIG009887	ENSRNOG00000002163	Klf3	Kruppel-like factor 3 (basic) [Source:RGD Symbol;Acc:1593290]	45.1	22.9	-0.981	0.0479	0.961802	yes	DOWN	N	N	N	Y	N	45.35	22.75
TBIG009539	ENSRNOG00000010598	Hs3st1	heparan sulfate (glucosamine) 3-O-sulfotransferase 1 [Source:RGD Symbol;Acc:71084]	46.1	20.4	-1.17	0.048	0.96296	yes	DOWN	N	N	N	Y	Y	46.36	20.34
TBIG011605	ENSRNOG00000011424	Cldn23	claudin 23 [Source:RGD Symbol;Acc:1309001]	48.2	23.2	-1.06	0.0481	0.963269	yes	DOWN	N	N	N	Y	Y	48.47	23.06
TBIG004889	ENSRNOG00000027871.L01	RAPGEFL1	Uncharacterized protein [Source:UniProtKB/TrEMBL;Acc:F1LPE3]	41	18.5	-1.15	0.04845	0.968575	yes	DOWN	N	N	N	Y	Y	41.22	18.44
TBIG013677	ENSRNOG00000019462.L01	Pcdh1	protocadherin 1 [Source:RGD Symbol;Acc:1308490]	49.3	22.6	-1.12	0.04855	0.968872	yes	DOWN	N	N	N	Y	Y	49.48	22.48
TBIG030708	ENSRNOG00000029330.L01	Car5b	carbonic anhydrase 5b, mitochondrial [Source:RGD Symbol;Acc:1549783]	48.8	17.6	-1.47	0.04885	0.972303	yes	DOWN	N	N	N	Y	Y	48.99	17.56
TBIG000040	ENSRNOG00000012286.L01	Il20ra	interleukin 20 receptor, alpha [Source:RGD Symbol;Acc:1307335]	15.2	5.53	-1.46	0.049	0.973314	yes	DOWN	N	N	N	Y	Y	15.31	5.5
TBIG027451	XLOC_027451	-	-	3.73	1.01	-1.88	0.049	0.973314	yes	DOWN	N	N	N	Y	Y	3.74	1.01
TBIG024813	ENSRNOG00000032178.L01	Cenpa	centromere protein A [Source:RGD Symbol;Acc:1563607]	4.34	0.768	-2.5	0.04905	0.973314	yes	DOWN	N	N	N	Y	Y	4.37	0.76
TBIG012614	ENSRNOG00000017569.L01	Mastl	microtubule associated serine/threonine kinase-like [Source:RGD Symbol;Acc:1309186]	1.91	0.397	-2.26	0.0492	0.973314	yes	DOWN	N	N	N	Y	Y	1.91	0.4
TBIG023213	ENSRNOG00000012081.L01	Txn1	thioredoxin 1 [Source:RGD Symbol;Acc:621157]	961	475	-1.02	0.0492	0.973314	yes	DOWN	N	N	N	Y	Y	965.34	472.28
TBIG010412	ENSRNOG00000011377.L01	Socs4	suppressor of cytokine signaling 4 [Source:RGD Symbol;Acc:1306503]	6.62	2.52	-1.39	0.0495	0.976703	yes	DOWN	N	N	N	Y	Y	6.65	2.51
TBIG016277	ENSRNOG00000016477.L01	Vangl1	VANGL planar cell polarity protein 1 [Source:RGD Symbol;Acc:1597324]	29.2	14.8	-0.984	0.0495	0.976703	yes	DOWN	N	N	N	Y	N	29.38	14.71
TBIG023402	ENSRNOG00000019100.L01	Kif2c	kinesin family member 2C [Source:RGD Symbol;Acc:620239]	3.19	0.809	-1.98	0.04955	0.976843	yes	DOWN	N	N	N	Y	Y	3.2	0.81
TBIG008751	XLOC_008751	-	-	15.5	3.16	-2.29	0.0499	0.982042	yes	DOWN	N	N	N	Y	Y	15.53	3.15
TBIG003650	XLOC_003650	pol	Pol polyprotein [Source:SWISS;Acc:P31795]	11.5	93.8	3.03	5e-05	0.0277683	yes	UP	Y	Y	Y	Y	Y	11.51	93.36
TBIG002222	ENSRNOG00000019627.L01	Mybpc2	myosin binding protein C, fast-type [Source:RGD Symbol;Acc:1311596]	10.9	101	3.21	5e-05	0.0277683	yes	UP	Y	Y	Y	Y	Y	10.99	100.67
TBIG001165	ENSRNOG00000018978.L01	Cd163l1	CD163 molecule-like 1 [Source:RGD Symbol;Acc:1307378]	3.41	24.1	2.82	5e-05	0.0277683	yes	UP	Y	Y	Y	Y	Y	3.43	24.02
TBIG004586	ENSRNOG00000005659.L01	Aurkb	aurora kinase B [Source:RGD Symbol;Acc:621625]	25.1	128	2.35	5e-05	0.0277683	yes	UP	Y	Y	Y	Y	Y	25.24	127.21
TBIG008392	ENSRNOG00000003336.L01	Mybph	myosin binding protein H [Source:RGD Symbol;Acc:620287]	10.4	51.8	2.31	5e-05	0.0277683	yes	UP	Y	Y	Y	Y	Y	10.47	51.53
TBIG011301	XLOC_011301	-	-	0	0.752	inf	5e-05	0.0277683	yes	UP	Y	Y	Y	Y	Y	0	0.75
TBIG016581	XLOC_016581	Pol	Retrovirus-related Pol polyprotein LINE-1 [Source:SWISS;Acc:P11369]	0	4.45	inf	5e-05	0.0277683	yes	UP	Y	Y	Y	Y	Y	0	4.42
TBIG018935	XLOC_018935	-	-	1.73	15.6	3.18	5e-05	0.0277683	yes	UP	Y	Y	Y	Y	Y	1.74	15.56
TBIG019057	ENSRNOG00000042083	AABR06022401.1	Uncharacterized protein [Source:UniProtKB/TrEMBL;Acc:F1M1Q7]	0	57	inf	5e-05	0.0277683	yes	UP	Y	Y	Y	Y	Y	0	56.77
TBIG019611	XLOC_019611	-	-	0	1.72	inf	5e-05	0.0277683	yes	UP	Y	Y	Y	Y	Y	0	1.71
TBIG020384	XLOC_020384	-	-	0	1.45	inf	5e-05	0.0277683	yes	UP	Y	Y	Y	Y	Y	0	1.44
TBIG022031	XLOC_022031	pol	Pol polyprotein [Source:SWISS;Acc:P26808]	13	62.4	2.27	5e-05	0.0277683	yes	UP	Y	Y	Y	Y	Y	13.01	62.13
TBIG023762	XLOC_023762	gag	Retrovirus-related Gag polyprotein [Source:SWISS;Acc:P11365]	0	1.27	inf	5e-05	0.0277683	yes	UP	Y	Y	Y	Y	Y	0	1.26
TBIG025190	XLOC_025190	Ighm	Ig mu chain C region [Source:SWISS;Acc:P01872]	8.56	116	3.76	5e-05	0.0277683	yes	UP	Y	Y	Y	Y	Y	8.6	115.67
TBIG025244	XLOC_025244	HVR01_RAT	Ig heavy chain V region IR2 [Source:SWISS;Acc:P01805]	0	112	inf	5e-05	0.0277683	yes	UP	Y	Y	Y	Y	Y	0	111.45
TBIG026827	ENSRNOG00000006471.L01	Pvalb	parvalbumin [Source:RGD Symbol;Acc:3457]	7.06	864	6.93	5e-05	0.0277683	yes	UP	Y	Y	Y	Y	Y	7.1	860.14
TBIG026142	XLOC_026142	pol	Pol polyprotein [Source:SWISS;Acc:P26809]	4.06	55.9	3.78	5e-05	0.0277683	yes	UP	Y	Y	Y	Y	Y	4.08	55.62
TBIG029273	ENSRNOG00000046834.L01	C3	complement component 3 [Source:RGD Symbol;Acc:2232]	5.61	28.2	2.33	5e-05	0.0277683	yes	UP	Y	Y	Y	Y	Y	5.64	28.03
TBIG030041	ENSRNOG00000028656.L01	Ccdc108	coiled-coil domain containing 108 [Source:RGD Symbol;Acc:1563002]	4.08	25.7	2.65	5e-05	0.0277683	yes	UP	Y	Y	Y	Y	Y	4.1	25.53
TBIG030137	ENSRNOG00000051286	LOC100911516	coiled-coil-helix-coiled-coil-helix domain-containing protein 2, mitochondrial-like [Source:RGD Symbol;Acc:6492335]	0	27.5	inf	5e-05	0.0277683	yes	UP	Y	Y	Y	Y	Y	0	27.38
TBIG021051	ENSRNOG00000024508.L01	LOC690326	hypothetical protein LOC690326 [Source:RGD Symbol;Acc:1597362]	0	1.89	inf	0.00015	0.0644434	yes	UP	N	Y	Y	Y	Y	0	1.88
TBIG022871	ENSRNOG00000007574.L01	Padi2	peptidyl arginine deiminase, type II [Source:RGD Symbol;Acc:3288]	5.15	23	2.16	0.00015	0.0644434	yes	UP	N	Y	Y	Y	Y	5.18	22.86
TBIG020752	ENSRNOG00000049829.L01	Igkc	immunoglobulin kappa constant [Source:MGI Symbol;Acc:MGI:96495]	15.1	198	3.71	0.0002	0.0759	yes	UP	N	Y	Y	Y	Y	15.19	196.68
TBIG012014	ENSRNOG00000011754.L01	Myom2	myomesin 2 [Source:RGD Symbol;Acc:631437]	5.06	21.1	2.06	0.00025	0.0837132	yes	UP	N	Y	Y	Y	Y	5.08	20.96
TBIG018095	ENSRNOG00000046371.L01	AABR06022585.1	Uncharacterized protein [Source:UniProtKB/TrEMBL;Acc:M0R8G6]	0	6.53	inf	0.00025	0.0837132	yes	UP	N	Y	Y	Y	Y	0	6.5
TBIG021848	ENSRNOG00000031249.L01	Slco1a2	solute carrier organic anion transporter family, member 1A2 [Source:RGD Symbol;Acc:70985]	5.44	27.1	2.32	0.00025	0.0837132	yes	UP	N	Y	Y	Y	Y	5.47	26.98
TBIG028058	ENSRNOG00000029586.L01	Cdhr4	cadherin-related family member 4 [Source:RGD Symbol;Acc:1306603]	6.01	36.6	2.61	0.00025	0.0837132	yes	UP	N	Y	Y	Y	Y	6.04	36.39
TBIG029699	XLOC_029699	CROL3_HUMAN	Putative ciliary rootlet coiled-coil protein-like 3 protein [Source:SWISS;Acc:H7BZ55]	1.69	12.3	2.86	0.00025	0.0837132	yes	UP	N	Y	Y	Y	Y	1.7	12.22
TBIG011742	ENSRNOG00000026914.L01	Dnah1	dynein, axonemal, heavy chain 1 [Source:RGD Symbol;Acc:621795]	1.53	8.37	2.46	0.0003	0.09108	yes	UP	N	Y	Y	Y	Y	1.53	8.33
TBIG030928	ENSRNOG00000019213	Gpd1	glycerol-3-phosphate dehydrogenase 1 (soluble) [Source:RGD Symbol;Acc:621381]	11.1	46.1	2.06	0.0003	0.09108	yes	UP	N	Y	Y	Y	Y	11.13	45.83
TBIG005251	XLOC_005251	Pdia2	Protein disulfide-isomerase A2 [Source:SWISS;Acc:D3Z6P0]	0.768	8.34	3.44	0.00035	0.102173	yes	UP	N	N	Y	Y	Y	0.77	8.3
TBIG011385	XLOC_011385	Dnah12	Dynein heavy chain 12, axonemal [Source:SWISS;Acc:Q923J6]	3.38	19.4	2.52	0.0004	0.10445	yes	UP	N	N	Y	Y	Y	3.4	19.34
TBIG009042	XLOC_009042	-	-	0	1.15	inf	0.00045	0.10445	yes	UP	N	N	Y	Y	Y	0	1.14
TBIG011384	XLOC_011384	Dnah12	Dynein heavy chain 12, axonemal [Source:SWISS;Acc:Q923J6]	0	1.51	inf	0.00045	0.10445	yes	UP	N	N	Y	Y	Y	0	1.5
TBIG016584	XLOC_016584	-	-	0	1.13	inf	0.00045	0.10445	yes	UP	N	N	Y	Y	Y	0	1.13
TBIG017783	XLOC_017783	IN	Probable Pol polyprotein [Source:SWISS;Acc:P12894]	0	0.613	inf	0.00045	0.10445	yes	UP	N	N	Y	Y	Y	0	0.61
TBIG017863	XLOC_017863	-	-	0	1	inf	0.00045	0.10445	yes	UP	N	N	Y	Y	Y	0	1
TBIG022066	XLOC_022066	-	-	0	0.781	inf	0.00045	0.10445	yes	UP	N	N	Y	Y	Y	0	0.78
TBIG022076	XLOC_022076	-	-	0	1.11	inf	0.00045	0.10445	yes	UP	N	N	Y	Y	Y	0	1.1
TBIG025398	XLOC_025398	-	-	0	0.515	inf	0.00045	0.10445	yes	UP	N	N	Y	Y	Y	0	0.51
TBIG025255	ENSRNOG00000048062	LOC100363779	hypothetical protein LOC100363779 [Source:RGD Symbol;Acc:2322373]	0	6.53	inf	0.00045	0.10445	yes	UP	N	N	Y	Y	Y	0	6.49
TBIG008427	XLOC_008427	-	-	0	8.81	inf	0.0005	0.10445	yes	UP	N	N	Y	Y	Y	0	8.77
TBIG009251	XLOC_009251	-	-	0	0.749	inf	0.0005	0.10445	yes	UP	N	N	Y	Y	Y	0	0.75
TBIG014675	XLOC_014675	-	-	0	6.39	inf	0.0005	0.10445	yes	UP	N	N	Y	Y	Y	0	6.36
TBIG014759	XLOC_014759	-	-	0	1.31	inf	0.0005	0.10445	yes	UP	N	N	Y	Y	Y	0	1.31
TBIG016491	XLOC_016491	-	-	0	0.903	inf	0.0005	0.10445	yes	UP	N	N	Y	Y	Y	0	0.9
TBIG020251	XLOC_020251	-	-	0	1.15	inf	0.0005	0.10445	yes	UP	N	N	Y	Y	Y	0	1.15
TBIG021985	XLOC_021985	-	-	0	2.61	inf	0.0005	0.10445	yes	UP	N	N	Y	Y	Y	0	2.59
TBIG025502	XLOC_025502	-	-	0	0.894	inf	0.0005	0.10445	yes	UP	N	N	Y	Y	Y	0	0.89
TBIG025631	XLOC_025631	Fmn1	Formin-1 [Source:SWISS;Acc:Q05860]	0	0.928	inf	0.0005	0.10445	yes	UP	N	N	Y	Y	Y	0	0.92
TBIG027260	XLOC_027260	-	-	0	1.22	inf	0.0005	0.10445	yes	UP	N	N	Y	Y	Y	0	1.21
TBIG029252	XLOC_029252	-	-	0	1.66	inf	0.0005	0.10445	yes	UP	N	N	Y	Y	Y	0	1.66
TBIG000621	ENSRNOG00000021027.L01	Dbp	D site of albumin promoter (albumin D-box) binding protein [Source:RGD Symbol;Acc:2491]	19.5	98.3	2.34	0.00055	0.109296	yes	UP	N	N	Y	Y	Y	19.56	97.78
TBIG001196	ENSRNOG00000047551	Pnpla2	patatin-like phospholipase domain containing 2 [Source:RGD Symbol;Acc:1309044]	0	0.811	inf	0.00055	0.109296	yes	UP	N	N	Y	Y	Y	0	0.81
TBIG000041	XLOC_000041	-	-	0	1.4	inf	0.0006	0.109296	yes	UP	N	N	Y	Y	Y	0	1.39
TBIG004020	XLOC_004020	-	-	0	1.25	inf	0.0006	0.109296	yes	UP	N	N	Y	Y	Y	0	1.24
TBIG006802	XLOC_006802	Map1	T-kininogen 1 [Source:SWISS;Acc:P01048]	0	3.43	inf	0.0006	0.109296	yes	UP	N	N	Y	Y	Y	0	3.42
TBIG013105	XLOC_013105	-	-	0	1.05	inf	0.0006	0.109296	yes	UP	N	N	Y	Y	Y	0	1.05
TBIG018076	XLOC_018076	KV206_HUMAN	Ig kappa chain V-II region RPMI 6410 [Source:SWISS;Acc:P06310]	0	7.75	inf	0.0006	0.109296	yes	UP	N	N	Y	Y	Y	0	7.72
TBIG028933	XLOC_028933	-	-	0	0.774	inf	0.0006	0.109296	yes	UP	N	N	Y	Y	Y	0	0.77
TBIG030248	XLOC_030248	-	-	0	1.26	inf	0.0006	0.109296	yes	UP	N	N	Y	Y	Y	0	1.25
TBIG030407	XLOC_030407	-	-	0	1.34	inf	0.0006	0.109296	yes	UP	N	N	Y	Y	Y	0	1.33
TBIG016436	XLOC_016436	-	-	0	1.43	inf	0.00065	0.114733	yes	UP	N	N	Y	Y	Y	0	1.42
TBIG022658	ENSRNOG00000023216.L01	Ccdc17	coiled-coil domain containing 17 [Source:RGD Symbol;Acc:1598211]	35.5	120	1.75	0.00065	0.114733	yes	UP	N	N	Y	Y	Y	35.64	119.07
TBIG030508	XLOC_030508	Ccdc146	Coiled-coil domain-containing protein 146 [Source:SWISS;Acc:Q66H60]	0	52.2	inf	0.00065	0.114733	yes	UP	N	N	Y	Y	Y	0	51.95
TBIG016644	XLOC_016644	-	-	0	4.61	inf	0.00075	0.12144	yes	UP	N	N	Y	Y	Y	0	4.59
TBIG016970	XLOC_016970	-	-	0	31	inf	0.00075	0.12144	yes	UP	N	N	Y	Y	Y	0	30.85
TBIG018091	XLOC_018091	KV5A3_MOUSE	Ig kappa chain V-V region K2 [Source:SWISS;Acc:P01635]	0	10.1	inf	0.00075	0.12144	yes	UP	N	N	Y	Y	Y	0	10.04
TBIG023896	XLOC_023896	-	-	0	1.72	inf	0.00075	0.12144	yes	UP	N	N	Y	Y	Y	0	1.71
TBIG026288	ENSRNOG00000002597	Hsd17b6	hydroxysteroid (17-beta) dehydrogenase 6 [Source:RGD Symbol;Acc:708343]	0	0.919	inf	0.00075	0.12144	yes	UP	N	N	Y	Y	Y	0	0.92
TBIG006094	XLOC_006094	-	-	0	0.629	inf	0.0008	0.12144	yes	UP	N	N	Y	Y	Y	0	0.63
TBIG022253	XLOC_022253	-	-	0	0.987	inf	0.0008	0.12144	yes	UP	N	N	Y	Y	Y	0	0.98
TBIG004551	XLOC_004551	MYH13	Myosin-13 [Source:SWISS;Acc:Q9UKX3]	21.1	132	2.65	0.00085	0.127332	yes	UP	N	N	Y	Y	Y	21.17	131.75
TBIG004120	XLOC_004120	-	-	0	0.959	inf	0.00095	0.136047	yes	UP	N	N	Y	Y	Y	0	0.95
TBIG004569	ENSRNOG00000049898	Myh4	myosin, heavy chain 4, skeletal muscle [Source:RGD Symbol;Acc:3139]	22.1	678	4.94	0.00095	0.136047	yes	UP	N	N	Y	Y	Y	22.14	675.12
TBIG006839	ENSRNOG00000042193.L01	AABR06069517.1	Uncharacterized protein [Source:UniProtKB/TrEMBL;Acc:F1MAE7]	0	4.89	inf	0.00095	0.136047	yes	UP	N	N	Y	Y	Y	0	4.86
TBIG017770	XLOC_017770	-	-	0	1.04	inf	0.00095	0.136047	yes	UP	N	N	Y	Y	Y	0	1.04
TBIG018084	XLOC_018084	KV6A6_MOUSE	Ig kappa chain V-VI region NQ2-17.4.1 [Source:SWISS;Acc:P04940]	0	9.94	inf	0.00095	0.136047	yes	UP	N	N	Y	Y	Y	0	9.9
TBIG030250	XLOC_030250	IN	Probable Pol polyprotein [Source:SWISS;Acc:P12894]	0	0.629	inf	0.00095	0.136047	yes	UP	N	N	Y	Y	Y	0	0.63
TBIG008929	ENSRNOG00000006930.L01	Casq1	calsequestrin 1 (fast-twitch, skeletal muscle) [Source:RGD Symbol;Acc:1586677]	88.3	316	1.84	0.001	0.139693	yes	UP	N	N	Y	Y	Y	88.75	314.25
TBIG024858	XLOC_024858	-	-	4.1	25.8	2.65	0.00115	0.157744	yes	UP	N	N	Y	Y	Y	4.12	25.63
TBIG002973	ENSRNOG00000019745.L01	Actn3	actinin alpha 3 [Source:RGD Symbol;Acc:621792]	0.708	157	7.79	0.00145	0.185486	yes	UP	N	N	Y	Y	Y	0.71	156.33
TBIG006506	XLOC_006506	Foxj1	Forkhead box protein J1 [Source:SWISS;Acc:Q63247]	4.15	30.6	2.88	0.0022	0.263653	yes	UP	N	N	Y	Y	Y	4.17	30.46
TBIG018670	ENSRNOG00000008235.L01	Mylk2	myosin light chain kinase 2 [Source:RGD Symbol;Acc:620934]	5.23	17.7	1.76	0.0022	0.263653	yes	UP	N	N	Y	Y	Y	5.26	17.61
TBIG011785	ENSRNOG00000048797.L01	Sftpd	surfactant protein D [Source:RGD Symbol;Acc:3667]	27.6	89	1.69	0.0025	0.291776	yes	UP	N	N	Y	Y	Y	27.69	88.55
TBIG007767	ENSRNOG00000001036.L01	Rsph10b	radial spoke head 10 homolog B (Chlamydomonas) [Source:RGD Symbol;Acc:1311893]	1.97	10.8	2.46	0.00255	0.291776	yes	UP	N	N	Y	Y	Y	1.98	10.8
TBIG001035	ENSRNOG00000025110.L01	Vwa3a	von Willebrand factor A domain containing 3A [Source:RGD Symbol;Acc:1311670]	2.57	13.6	2.41	0.00265	0.300202	yes	UP	N	N	Y	Y	Y	2.59	13.57
TBIG028010	ENSRNOG00000008210.L01	Ky	kyphoscoliosis peptidase [Source:RGD Symbol;Acc:1305407]	6.76	20.5	1.6	0.00265	0.300201	yes	UP	N	N	Y	Y	Y	6.79	20.37
TBIG010339	ENSRNOG00000013034	Dupd1	dual specificity phosphatase and pro isomerase domain containing 1 [Source:RGD Symbol;Acc:1310229]	2.36	24.4	3.37	0.0027	0.304351	yes	UP	N	N	Y	Y	Y	2.37	24.3
TBIG008168	XLOC_008168	pol	Pol polyprotein [Source:SWISS;Acc:P11227]	28	110	1.97	0.00325	0.344198	yes	UP	N	N	Y	Y	Y	28.14	109.25
TBIG015380	ENSRNOG00000020539.L01	Muc1	mucin 1, cell surface associated [Source:RGD Symbol;Acc:3122]	17.7	52.9	1.58	0.00345	0.353858	yes	UP	N	N	Y	Y	Y	17.84	52.69
TBIG029424	ENSRNOG00000013415.L01	Ptpn18	protein tyrosine phosphatase, non-receptor type 18 [Source:RGD Symbol;Acc:1311586]	32.3	99.5	1.63	0.00355	0.35926	yes	UP	N	N	Y	Y	Y	32.41	99.03
TBIG022617	ENSRNOG00000008001	Rab3b	RAB3B, member RAS oncogene family [Source:RGD Symbol;Acc:620922]	2.12	18.1	3.1	0.00365	0.366126	yes	UP	N	N	Y	Y	Y	2.13	18.04
TBIG027732	ENSRNOG00000039086.L01	Ccdc153	coiled-coil domain containing 153 [Source:RGD Symbol;Acc:1305351]	5.16	26.3	2.35	0.00365	0.366126	yes	UP	N	N	Y	Y	Y	5.18	26.17
TBIG000418	ENSRNOG00000028900.L01	Cyp2a3	cytochrome P450, family 2, subfamily a, polypeptide 3 [Source:RGD Symbol;Acc:2465]	50.9	151	1.57	0.0037	0.369513	yes	UP	N	N	Y	Y	Y	51.19	150.35
TBIG011943	ENSRNOG00000011518	Dusp26	dual specificity phosphatase 26 (putative) [Source:RGD Symbol;Acc:1310090]	5.23	24.2	2.21	0.00385	0.38115	yes	UP	N	N	Y	Y	Y	5.26	24.04
TBIG011957	XLOC_011957	-	-	0.517	3.57	2.79	0.00395	0.387679	yes	UP	N	N	Y	Y	Y	0.52	3.55
TBIG004292	ENSRNOG00000016026	RGD1562673	similar to Prostatic spermine-binding protein precursor (SBP) [Source:RGD Symbol;Acc:1562673]	4.46	37.3	3.07	0.00405	0.395788	yes	UP	N	N	Y	Y	Y	4.48	37.16
TBIG014000	XLOC_014000	gag-pol	Gag-Pol polyprotein [Source:SWISS;Acc:P03355]	4.65	15.4	1.73	0.0041	0.398962	yes	UP	N	N	Y	Y	Y	4.67	15.33
TBIG009744	ENSRNOG00000043451	Spp1	secreted phosphoprotein 1 [Source:RGD Symbol;Acc:3752]	5.45	24.4	2.16	0.0042	0.405229	yes	UP	N	N	Y	Y	Y	5.47	24.24
TBIG017753	XLOC_017753	pol	Pol polyprotein [Source:SWISS;Acc:P11227]	0.376	6.86	4.19	0.00425	0.408323	yes	UP	N	N	Y	Y	Y	0.38	6.83
TBIG001940	XLOC_001940	Dnaaf3	Dynein assembly factor 3, axonemal [Source:SWISS;Acc:D3ZCM9]	1.28	10.1	2.98	0.00535	0.422771	yes	UP	N	N	Y	Y	Y	1.29	10.04
TBIG020991	ENSRNOG00000048169.L01	Tuba8	tubulin, alpha 8 [Source:RGD Symbol;Acc:1566041]	17	50.3	1.57	0.00535	0.422771	yes	UP	N	N	Y	Y	Y	17.09	50.1
TBIG002919	ENSRNOG00000020484.L01	Trpm5	transient receptor potential cation channel, subfamily M, member 5 [Source:RGD Symbol;Acc:1310620]	4.55	13.7	1.59	0.00555	0.422771	yes	UP	N	N	Y	Y	Y	4.57	13.68
TBIG000838	ENSRNOG00000017716.L01	Ucp3	uncoupling protein 3 (mitochondrial, proton carrier) [Source:RGD Symbol;Acc:3933]	11.1	31.2	1.5	0.0058	0.422771	yes	UP	N	N	Y	Y	Y	11.1	31.02
TBIG021236	ENSRNOG00000009565	Pdk4	pyruvate dehydrogenase kinase, isozyme 4 [Source:RGD Symbol;Acc:69061]	44.7	131	1.55	0.0061	0.422771	yes	UP	N	N	Y	Y	Y	44.96	130.81
TBIG027029	ENSRNOG00000036827	Ppp1r1a	protein phosphatase 1, regulatory (inhibitor) subunit 1A [Source:RGD Symbol;Acc:62018]	4.65	18	1.96	0.00615	0.422771	yes	UP	N	N	Y	Y	Y	4.67	17.95
TBIG015497	ENSRNOG00000019120.L01	Hmgcs2	3-hydroxy-3-methylglutaryl-CoA synthase 2 (mitochondrial) [Source:RGD Symbol;Acc:2804]	4.01	16.8	2.07	0.0062	0.422771	yes	UP	N	N	Y	Y	Y	4.03	16.72
TBIG005886	ENSRNOG00000002753.L01	Adam11	ADAM metallopeptidase domain 11 [Source:RGD Symbol;Acc:1307515]	16.1	48.3	1.59	0.0064	0.422771	yes	UP	N	N	Y	Y	Y	16.15	48.09
TBIG021464	ENSRNOG00000013605.L01	Sh2d6	SH2 domain containing 6 [Source:RGD Symbol;Acc:1587427]	18.4	50.5	1.45	0.0065	0.422771	yes	UP	N	N	Y	Y	Y	18.54	50.28
TBIG003289	ENSRNOG00000036585.L01	Cfap43	cilia and flagella associated protein 43 [Source:RGD Symbol;Acc:1560545]	2.68	12.1	2.17	0.00725	0.422771	yes	UP	N	N	Y	Y	Y	2.7	12.05
TBIG015129	ENSRNOG00000010805.L01	Fabp4	fatty acid binding protein 4, adipocyte [Source:RGD Symbol;Acc:69309]	147	377	1.36	0.00725	0.422771	yes	UP	N	N	Y	Y	Y	147.75	374.87
TBIG015708	ENSRNOG00000009533.L01	Erich3	glutamate-rich 3 [Source:RGD Symbol;Acc:1593279]	0.71	3.07	2.11	0.00755	0.422771	yes	UP	N	N	Y	Y	Y	0.71	3.06
TBIG023638	ENSRNOG00000028064.L01	Fhad1	forkhead-associated (FHA) phosphopeptide binding domain 1 [Source:RGD Symbol;Acc:1563444]	1.19	5.33	2.16	0.00755	0.422771	yes	UP	N	N	Y	Y	Y	1.2	5.3
TBIG026849	ENSRNOG00000021795.L01	Fam227a	family with sequence similarity 227, member A [Source:RGD Symbol;Acc:1305939]	2.96	9.82	1.73	0.00755	0.422771	yes	UP	N	N	Y	Y	Y	2.98	9.77
TBIG014525	ENSRNOG00000017178	Hydin	Hydin, axonemal central pair apparatus protein [Source:RGD Symbol;Acc:1562254]	0.574	2.54	2.14	0.0076	0.422771	yes	UP	N	N	Y	Y	Y	0.58	2.53
TBIG021471	ENSRNOG00000015581.L01	Dnah6	dynein, axonemal, heavy chain 6 [Source:RGD Symbol;Acc:621797]	0.563	3.23	2.52	0.0076	0.422771	yes	UP	N	N	Y	Y	Y	0.57	3.21
TBIG017511	ENSRNOG00000022523.L01	Fkbp5	FK506 binding protein 5 [Source:RGD Symbol;Acc:1309155]	2.61	9.69	1.89	0.0077	0.422771	yes	UP	N	N	Y	Y	Y	2.62	9.65
TBIG028134	ENSRNOG00000032085.L01	Dlec1	deleted in lung and esophageal cancer 1 [Source:RGD Symbol;Acc:1561649]	2.36	15.4	2.71	0.0078	0.422771	yes	UP	N	N	Y	Y	Y	2.37	15.33
TBIG011665	ENSRNOG00000048769.L01	Nek5	NIMA-related kinase 5 [Source:RGD Symbol;Acc:1593817]	1.89	8.66	2.2	0.0083	0.422771	yes	UP	N	N	Y	Y	Y	1.89	8.62
TBIG009129	XLOC_009129	-	-	0	1.91	inf	0.0086	0.422771	yes	UP	N	N	Y	Y	Y	0	1.9
TBIG011306	XLOC_011306	-	-	0	0.771	inf	0.0086	0.422771	yes	UP	N	N	Y	Y	Y	0	0.77
TBIG012746	XLOC_012746	-	-	0	2.39	inf	0.0086	0.422771	yes	UP	N	N	Y	Y	Y	0	2.37
TBIG014796	XLOC_014796	env	Envelope glycoprotein [Source:SWISS;Acc:P21415]	0	0.882	inf	0.0086	0.422771	yes	UP	N	N	Y	Y	Y	0	0.88
TBIG016853	XLOC_016853	-	-	0	1.03	inf	0.0086	0.422771	yes	UP	N	N	Y	Y	Y	0	1.03
TBIG017861	XLOC_017861	-	-	0	1.92	inf	0.0086	0.422771	yes	UP	N	N	Y	Y	Y	0	1.91
TBIG020262	XLOC_020262	-	-	0	1.69	inf	0.0086	0.422771	yes	UP	N	N	Y	Y	Y	0	1.68
TBIG021099	ENSRNOG00000005947	Pde6h	phosphodiesterase 6H, cGMP-specific, cone, gamma [Source:RGD Symbol;Acc:70933]	0	2.89	inf	0.0086	0.422771	yes	UP	N	N	Y	Y	Y	0	2.87
TBIG022285	ENSRNOG00000007540	Msc	musculin [Source:RGD Symbol;Acc:1305496]	0	1.91	inf	0.0086	0.422771	yes	UP	N	N	Y	Y	Y	0	1.9
TBIG026531	ENSRNOG00000024494.L01	AABR06048806.1	Uncharacterized protein [Source:UniProtKB/TrEMBL;Acc:F1M063]	0.468	4.12	3.14	0.0086	0.422771	yes	UP	N	N	Y	Y	Y	0.47	4.1
TBIG029450	XLOC_029450	-	-	0	2.04	inf	0.0086	0.422771	yes	UP	N	N	Y	Y	Y	0	2.03
TBIG024817	ENSRNOG00000024905.L01	Drc1	dynein regulatory complex subunit 1 [Source:RGD Symbol;Acc:1359318]	1.96	8.92	2.19	0.00865	0.422771	yes	UP	N	N	Y	Y	Y	1.97	8.87
TBIG022922	XLOC_022922	-	-	1.29	5.11	1.99	0.00875	0.422771	yes	UP	N	N	Y	Y	Y	1.29	5.09
TBIG028140	ENSRNOG00000034089.L01	Ttc21a	tetratricopeptide repeat domain 21A [Source:RGD Symbol;Acc:1308806]	0.682	4.06	2.57	0.0088	0.422771	yes	UP	N	N	Y	Y	Y	0.69	4.04
TBIG006100	XLOC_006100	Nedd4	E3 ubiquitin-protein ligase NEDD4 [Source:SWISS;Acc:P46935]	0	2.15	inf	0.00885	0.422771	yes	UP	N	N	Y	Y	Y	0	2.14
TBIG006365	XLOC_006365	-	-	0	1.56	inf	0.00885	0.422771	yes	UP	N	N	Y	Y	Y	0	1.55
TBIG006451	XLOC_006451	-	-	0	0.819	inf	0.00885	0.422771	yes	UP	N	N	Y	Y	Y	0	0.82
TBIG008175	XLOC_008175	-	-	0	1.2	inf	0.00885	0.422771	yes	UP	N	N	Y	Y	Y	0	1.19
TBIG008190	XLOC_008190	-	-	0	0.872	inf	0.00885	0.422771	yes	UP	N	N	Y	Y	Y	0	0.87
TBIG010273	XLOC_010273	-	-	0	1.74	inf	0.00885	0.422771	yes	UP	N	N	Y	Y	Y	0	1.74
TBIG016929	XLOC_016929	-	-	0	0.653	inf	0.00885	0.422771	yes	UP	N	N	Y	Y	Y	0	0.65
TBIG022238	XLOC_022238	-	-	0	0.954	inf	0.00885	0.422771	yes	UP	N	N	Y	Y	Y	0	0.95
TBIG024080	XLOC_024080	-	-	0	0.921	inf	0.00885	0.422771	yes	UP	N	N	Y	Y	Y	0	0.92
TBIG024135	XLOC_024135	-	-	0	0.732	inf	0.00885	0.422771	yes	UP	N	N	Y	Y	Y	0	0.73
TBIG024156	XLOC_024156	-	-	0	0.855	inf	0.00885	0.422771	yes	UP	N	N	Y	Y	Y	0	0.85
TBIG027099	XLOC_027099	-	-	0	1.48	inf	0.00885	0.422771	yes	UP	N	N	Y	Y	Y	0	1.48
TBIG030245	XLOC_030245	Pol	Retrovirus-related Pol polyprotein LINE-1 [Source:SWISS;Acc:P11369]	0	5.2	inf	0.00885	0.422771	yes	UP	N	N	Y	Y	Y	0	5.18
TBIG002846	ENSRNOG00000005953.L01	Cfap46	cilia and flagella associated protein 46 [Source:RGD Symbol;Acc:1559985]	0.946	5.5	2.54	0.0089	0.422771	yes	UP	N	N	Y	Y	Y	0.95	5.47
TBIG026848	ENSRNOG00000013807.L01	Dmc1	DNA meiotic recombinase 1 [Source:RGD Symbol;Acc:1307611]	0.492	4.04	3.04	0.00895	0.422771	yes	UP	N	N	Y	Y	Y	0.49	4.02
TBIG004617	ENSRNOG00000018748.L01	Slc16a11	solute carrier family 16, member 11 [Source:RGD Symbol;Acc:1311125]	48.9	136	1.48	0.00905	0.422771	yes	UP	N	N	Y	Y	Y	49.11	135.31
TBIG007294	XLOC_007294	-	-	0	1.62	inf	0.0093	0.422771	yes	UP	N	N	Y	Y	Y	0	1.61
TBIG009091	XLOC_009091	-	-	0	0.93	inf	0.0093	0.422771	yes	UP	N	N	Y	Y	Y	0	0.93
TBIG009188	XLOC_009188	-	-	0	0.783	inf	0.0093	0.422771	yes	UP	N	N	Y	Y	Y	0	0.78
TBIG014834	XLOC_014834	-	-	0	0.768	inf	0.0093	0.422771	yes	UP	N	N	Y	Y	Y	0	0.76
TBIG014892	XLOC_014892	-	-	0	0.705	inf	0.0093	0.422771	yes	UP	N	N	Y	Y	Y	0	0.7
TBIG016514	XLOC_016514	-	-	0	0.802	inf	0.0093	0.422771	yes	UP	N	N	Y	Y	Y	0	0.8
TBIG017762	XLOC_017762	-	-	0	1.55	inf	0.0093	0.422771	yes	UP	N	N	Y	Y	Y	0	1.54
TBIG024196	XLOC_024196	-	-	0	1.35	inf	0.0093	0.422771	yes	UP	N	N	Y	Y	Y	0	1.34
TBIG027526	ENSRNOG00000010507	Mmp7	matrix metallopeptidase 7 [Source:RGD Symbol;Acc:3100]	0	0.697	inf	0.0093	0.422771	yes	UP	N	N	Y	Y	Y	0	0.69
TBIG028924	XLOC_028924	-	-	0	0.75	inf	0.0093	0.422771	yes	UP	N	N	Y	Y	Y	0	0.75
TBIG030290	XLOC_030290	-	-	0	0.554	inf	0.0093	0.422771	yes	UP	N	N	Y	Y	Y	0	0.55
TBIG023125	ENSRNOG00000034290	Ccl21	chemokine (C-C motif) ligand 21 [Source:RGD Symbol;Acc:1311996]	55.6	144	1.37	0.0094	0.422771	yes	UP	N	N	Y	Y	Y	55.8	143.17
TBIG021567	ENSRNOG00000017959.L01	Ccdc37	coiled-coil domain containing 37 [Source:RGD Symbol;Acc:1305768]	5.36	22.2	2.05	0.00965	0.422771	yes	UP	N	N	Y	Y	Y	5.38	22.07
TBIG004009	XLOC_004009	-	-	0	1.63	inf	0.00985	0.422771	yes	UP	N	N	Y	Y	Y	0	1.63
TBIG004014	XLOC_004014	-	-	0	0.953	inf	0.00985	0.422771	yes	UP	N	N	Y	Y	Y	0	0.95
TBIG004049	XLOC_004049	-	-	0	0.646	inf	0.00985	0.422771	yes	UP	N	N	Y	Y	Y	0	0.64
TBIG006252	XLOC_006252	-	-	0	1.41	inf	0.00985	0.422771	yes	UP	N	N	Y	Y	Y	0	1.4
TBIG005624	XLOC_005624	-	-	0	1.08	inf	0.00985	0.422771	yes	UP	N	N	Y	Y	Y	0	1.08
TBIG006326	XLOC_006326	-	-	0	0.776	inf	0.00985	0.422771	yes	UP	N	N	Y	Y	Y	0	0.77
TBIG006334	XLOC_006334	-	-	0	1.29	inf	0.00985	0.422771	yes	UP	N	N	Y	Y	Y	0	1.28
TBIG007273	XLOC_007273	-	-	0	0.823	inf	0.00985	0.422771	yes	UP	N	N	Y	Y	Y	0	0.82
TBIG008233	XLOC_008233	Rpl32	60S ribosomal protein L32 [Source:SWISS;Acc:P62912]	0	0.736	inf	0.00985	0.422771	yes	UP	N	N	Y	Y	Y	0	0.73
TBIG008245	XLOC_008245	-	-	0	1.22	inf	0.00985	0.422771	yes	UP	N	N	Y	Y	Y	0	1.21
TBIG009098	XLOC_009098	-	-	0	0.915	inf	0.00985	0.422771	yes	UP	N	N	Y	Y	Y	0	0.91
TBIG009099	XLOC_009099	-	-	0	1.38	inf	0.00985	0.422771	yes	UP	N	N	Y	Y	Y	0	1.38
TBIG009187	XLOC_009187	-	-	0	1.53	inf	0.00985	0.422771	yes	UP	N	N	Y	Y	Y	0	1.53
TBIG009266	XLOC_009266	-	-	0	3.46	inf	0.00985	0.422771	yes	UP	N	N	Y	Y	Y	0	3.45
TBIG010229	XLOC_010229	-	-	0	1.36	inf	0.00985	0.422771	yes	UP	N	N	Y	Y	Y	0	1.35
TBIG010297	XLOC_010297	-	-	0	0.955	inf	0.00985	0.422771	yes	UP	N	N	Y	Y	Y	0	0.95
TBIG011165	XLOC_011165	-	-	0	1.15	inf	0.00985	0.422771	yes	UP	N	N	Y	Y	Y	0	1.15
TBIG011342	XLOC_011342	-	-	0	1.14	inf	0.00985	0.422771	yes	UP	N	N	Y	Y	Y	0	1.13
TBIG012093	XLOC_012093	-	-	0	0.753	inf	0.00985	0.422771	yes	UP	N	N	Y	Y	Y	0	0.75
TBIG012103	XLOC_012103	-	-	0	2.89	inf	0.00985	0.422771	yes	UP	N	N	Y	Y	Y	0	2.87
TBIG013015	XLOC_013015	-	-	0	1.44	inf	0.00985	0.422771	yes	UP	N	N	Y	Y	Y	0	1.43
TBIG014668	XLOC_014668	Nlrc5	Protein NLRC5 [Source:SWISS;Acc:C3VPR6]	0	0.664	inf	0.00985	0.422771	yes	UP	N	N	Y	Y	Y	0	0.66
TBIG016871	XLOC_016871	-	-	0	0.737	inf	0.00985	0.422771	yes	UP	N	N	Y	Y	Y	0	0.73
TBIG016889	XLOC_016889	-	-	0	1.06	inf	0.00985	0.422771	yes	UP	N	N	Y	Y	Y	0	1.06
TBIG016961	XLOC_016961	-	-	0	0.833	inf	0.00985	0.422771	yes	UP	N	N	Y	Y	Y	0	0.83
TBIG016962	XLOC_016962	-	-	0	1	inf	0.00985	0.422771	yes	UP	N	N	Y	Y	Y	0	1
TBIG017727	XLOC_017727	-	-	0	1.19	inf	0.00985	0.422771	yes	UP	N	N	Y	Y	Y	0	1.18
TBIG017728	XLOC_017728	-	-	0	1.01	inf	0.00985	0.422771	yes	UP	N	N	Y	Y	Y	0	1
TBIG020145	XLOC_020145	-	-	0	1.37	inf	0.00985	0.422771	yes	UP	N	N	Y	Y	Y	0	1.37
TBIG020361	XLOC_020361	-	-	0	0.774	inf	0.00985	0.422771	yes	UP	N	N	Y	Y	Y	0	0.77
TBIG021885	XLOC_021885	-	-	0	1.41	inf	0.00985	0.422771	yes	UP	N	N	Y	Y	Y	0	1.4
TBIG022070	XLOC_022070	-	-	0	6.06	inf	0.00985	0.422771	yes	UP	N	N	Y	Y	Y	0	6.03
TBIG023826	XLOC_023826	-	-	0	3.99	inf	0.00985	0.422771	yes	UP	N	N	Y	Y	Y	0	3.97
TBIG022424	XLOC_022424	-	-	0	4.71	inf	0.00985	0.422771	yes	UP	N	N	Y	Y	Y	0	4.69
TBIG023147	XLOC_023147	-	-	0	0.512	inf	0.00985	0.422771	yes	UP	N	N	Y	Y	Y	0	0.51
TBIG022545	XLOC_022545	-	-	0	0.626	inf	0.00985	0.422771	yes	UP	N	N	Y	Y	Y	0	0.62
TBIG025243	XLOC_025243	HVR01_RAT	Ig heavy chain V region IR2 [Source:SWISS;Acc:P01805]	0	3.92	inf	0.00985	0.422771	yes	UP	N	N	Y	Y	Y	0	3.9
TBIG025264	ENSRNOG00000049315	AABR06046654.1	Uncharacterized protein [Source:UniProtKB/TrEMBL;Acc:M0RE02]	0	3.57	inf	0.00985	0.422771	yes	UP	N	N	Y	Y	Y	0	3.55
TBIG025641	XLOC_025641	-	-	0	1.09	inf	0.00985	0.422771	yes	UP	N	N	Y	Y	Y	0	1.08
TBIG027031	ENSRNOG00000036825	Spt1	salivary protein 1 [Source:RGD Symbol;Acc:3754]	0	2.19	inf	0.00985	0.422771	yes	UP	N	N	Y	Y	Y	0	2.18
TBIG029061	XLOC_029061	-	-	0	2.41	inf	0.00985	0.422771	yes	UP	N	N	Y	Y	Y	0	2.4
TBIG028123	XLOC_028123	-	-	0	7.37	inf	0.00985	0.422771	yes	UP	N	N	Y	Y	Y	0	7.33
TBIG028153	XLOC_028153	-	-	0	1.27	inf	0.00985	0.422771	yes	UP	N	N	Y	Y	Y	0	1.26
TBIG030284	XLOC_030284	-	-	0	2.05	inf	0.00985	0.422771	yes	UP	N	N	Y	Y	Y	0	2.04
TBIG030288	XLOC_030288	-	-	0	1.71	inf	0.00985	0.422771	yes	UP	N	N	Y	Y	Y	0	1.7
TBIG030345	XLOC_030345	-	-	0	1.19	inf	0.00985	0.422771	yes	UP	N	N	Y	Y	Y	0	1.18
TBIG031564	XLOC_031564	Pol	Retrovirus-related Pol polyprotein LINE-1 [Source:SWISS;Acc:P11369]	0	1.52	inf	0.00985	0.422771	yes	UP	N	N	Y	Y	Y	0	1.51
TBIG005320	ENSRNOG00000046377.L01	LOC684480	similar to butyrophilin 3 [Source:RGD Symbol;Acc:1590287]	1.75	7.64	2.13	0.00995	0.422771	yes	UP	N	N	Y	Y	Y	1.76	7.6
TBIG023381	ENSRNOG00000009741.L01	Cyp4b1	cytochrome P450, family 4, subfamily b, polypeptide 1 [Source:RGD Symbol;Acc:2480]	10.8	31.9	1.56	0.00995	0.422771	yes	UP	N	N	Y	Y	Y	10.85	31.7
TBIG003664	XLOC_003664	-	-	0	4	inf	0.01015	0.422771	yes	UP	N	N	N	Y	Y	0	3.98
TBIG006143	XLOC_006143	-	-	0	1.42	inf	0.01015	0.422771	yes	UP	N	N	N	Y	Y	0	1.41
TBIG006404	XLOC_006404	-	-	0	1.54	inf	0.01015	0.422771	yes	UP	N	N	N	Y	Y	0	1.53
TBIG006426	XLOC_006426	-	-	0	0.916	inf	0.01015	0.422771	yes	UP	N	N	N	Y	Y	0	0.91
TBIG006514	XLOC_006514	-	-	0	1.32	inf	0.01015	0.422771	yes	UP	N	N	N	Y	Y	0	1.31
TBIG006798	ENSRNOG00000030462	Ostn	osteocrin [Source:RGD Symbol;Acc:1303110]	0	0.843	inf	0.01015	0.422771	yes	UP	N	N	N	Y	Y	0	0.84
TBIG008119	XLOC_008119	-	-	0	0.894	inf	0.01015	0.422771	yes	UP	N	N	N	Y	Y	0	0.89
TBIG008290	XLOC_008290	-	-	0	2.2	inf	0.01015	0.422771	yes	UP	N	N	N	Y	Y	0	2.19
TBIG009228	XLOC_009228	-	-	0	0.826	inf	0.01015	0.422771	yes	UP	N	N	N	Y	Y	0	0.82
TBIG010023	XLOC_010023	-	-	0	0.825	inf	0.01015	0.422771	yes	UP	N	N	N	Y	Y	0	0.82
TBIG010287	XLOC_010287	Nedd4	E3 ubiquitin-protein ligase NEDD4 [Source:SWISS;Acc:P46935]	0	1.01	inf	0.01015	0.422771	yes	UP	N	N	N	Y	Y	0	1
TBIG011233	XLOC_011233	-	-	0	0.921	inf	0.01015	0.422771	yes	UP	N	N	N	Y	Y	0	0.92
TBIG011262	XLOC_011262	-	-	0	0.784	inf	0.01015	0.422771	yes	UP	N	N	N	Y	Y	0	0.78
TBIG011334	XLOC_011334	-	-	0	0.795	inf	0.01015	0.422771	yes	UP	N	N	N	Y	Y	0	0.79
TBIG011867	XLOC_011867	DDX60	Probable ATP-dependent RNA helicase DDX60 [Source:SWISS;Acc:Q8IY21]	0	2.86	inf	0.01015	0.422771	yes	UP	N	N	N	Y	Y	0	2.85
TBIG013157	XLOC_013157	-	-	0	0.665	inf	0.01015	0.422771	yes	UP	N	N	N	Y	Y	0	0.66
TBIG014001	XLOC_014001	-	-	0	2.57	inf	0.01015	0.422771	yes	UP	N	N	N	Y	Y	0	2.56
TBIG015239	XLOC_015239	-	-	0	1.68	inf	0.01015	0.422771	yes	UP	N	N	N	Y	Y	0	1.67
TBIG017528	XLOC_017528	-	-	0	0.91	inf	0.01015	0.422771	yes	UP	N	N	N	Y	Y	0	0.91
TBIG020055	XLOC_020055	-	-	0	1.19	inf	0.01015	0.422771	yes	UP	N	N	N	Y	Y	0	1.19
TBIG022035	XLOC_022035	-	-	0	1.3	inf	0.01015	0.422771	yes	UP	N	N	N	Y	Y	0	1.29
TBIG021862	XLOC_021862	-	-	0	0.859	inf	0.01015	0.422771	yes	UP	N	N	N	Y	Y	0	0.86
TBIG023984	XLOC_023984	-	-	0	1.09	inf	0.01015	0.422771	yes	UP	N	N	N	Y	Y	0	1.09
TBIG024003	XLOC_024003	-	-	0	1.85	inf	0.01015	0.422771	yes	UP	N	N	N	Y	Y	0	1.84
TBIG025560	XLOC_025560	-	-	0	0.562	inf	0.01015	0.422771	yes	UP	N	N	N	Y	Y	0	0.56
TBIG027170	XLOC_027170	-	-	0	8.28	inf	0.01015	0.422771	yes	UP	N	N	N	Y	Y	0	8.24
TBIG028951	XLOC_028951	-	-	0	0.743	inf	0.01015	0.422771	yes	UP	N	N	N	Y	Y	0	0.74
TBIG029004	XLOC_029004	-	-	0	3.58	inf	0.01015	0.422771	yes	UP	N	N	N	Y	Y	0	3.56
TBIG028669	XLOC_028669	-	-	0	1.18	inf	0.01015	0.422771	yes	UP	N	N	N	Y	Y	0	1.17
TBIG029177	XLOC_029177	-	-	0	0.813	inf	0.01015	0.422771	yes	UP	N	N	N	Y	Y	0	0.81
TBIG030115	ENSRNOG00000020254.L01	Per2	period circadian clock 2 [Source:RGD Symbol;Acc:61945]	7.61	20.4	1.42	0.0104	0.422771	yes	UP	N	N	N	Y	Y	7.65	20.3
TBIG024826	ENSRNOG00000047581	LOC100365136	rCG43589-like [Source:RGD Symbol;Acc:2319638]	0	2.37	inf	0.0105	0.422771	yes	UP	N	N	N	Y	Y	0	2.36
TBIG024903	ENSRNOG00000039110.L01	Lsmem1	leucine-rich single-pass membrane protein 1 [Source:MGI Symbol;Acc:MGI:2685735]	3.41	11.8	1.79	0.0107	0.422771	yes	UP	N	N	N	Y	Y	3.43	11.72
TBIG022445	ENSRNOG00000010412.L01	Ccdc180	coiled-coil domain containing 180 [Source:RGD Symbol;Acc:6498132]	0.746	3.34	2.16	0.01075	0.422771	yes	UP	N	N	N	Y	Y	0.75	3.32
TBIG001666	ENSRNOG00000042741.L01	Adgb	androglobin [Source:RGD Symbol;Acc:1564259]	0.45	2.66	2.56	0.0108	0.422771	yes	UP	N	N	N	Y	Y	0.45	2.65
TBIG019745	ENSRNOG00000008170.L01	Jph2	junctophilin 2 [Source:RGD Symbol;Acc:1305196]	14	35.5	1.34	0.0108	0.422771	yes	UP	N	N	N	Y	Y	14.08	35.32
TBIG004467	XLOC_004467	Pol	Retrovirus-related Pol polyprotein LINE-1 [Source:SWISS;Acc:P11369]	0.397	5.04	3.67	0.01105	0.422771	yes	UP	N	N	N	Y	Y	0.4	5.02
TBIG008924	ENSRNOG00000023209	Slamf7	SLAM family member 7 [Source:RGD Symbol;Acc:1560190]	0	0.512	inf	0.01115	0.422771	yes	UP	N	N	N	Y	Y	0	0.51
TBIG022757	XLOC_022757	CSMD2	CUB and sushi domain-containing protein 2 [Source:SWISS;Acc:Q7Z408]	0	0.691	inf	0.01115	0.422771	yes	UP	N	N	N	Y	Y	0	0.69
TBIG022699	ENSRNOG00000037451.L01	LOC100912735	uncharacterized LOC100912735 [Source:RGD Symbol;Acc:6485680]	0	21.4	inf	0.0112	0.422771	yes	UP	N	N	N	Y	Y	0	21.33
TBIG003848	XLOC_003848	gag	Gag polyprotein [Source:SWISS;Acc:P03337]	2.41	23.9	3.31	0.01125	0.422771	yes	UP	N	N	N	Y	Y	2.43	23.74
TBIG002768	ENSRNOG00000019342	Sult1a1	sulfotransferase family, cytosolic, 1A, phenol-preferring, member 1 [Source:RGD Symbol;Acc:3767]	14.8	47.8	1.69	0.01125	0.422771	yes	UP	N	N	N	Y	Y	14.91	47.55
TBIG001192	ENSRNOG00000004273.L01	Ifitm1	interferon induced transmembrane protein 1 [Source:RGD Symbol;Acc:1307601]	72.9	203	1.48	0.01125	0.422771	yes	UP	N	N	N	Y	Y	73.28	202.33
TBIG029698	XLOC_029698	CROL3_HUMAN	Putative ciliary rootlet coiled-coil protein-like 3 protein [Source:SWISS;Acc:H7BZ55]	0.262	3.02	3.53	0.0116	0.422771	yes	UP	N	N	N	Y	Y	0.26	3
TBIG002208	XLOC_002208	Klk8	Kallikrein-8 [Source:SWISS;Acc:Q61955]	0	0.697	inf	0.0117	0.422771	yes	UP	N	N	N	Y	Y	0	0.69
TBIG004018	XLOC_004018	-	-	0	0.573	inf	0.0117	0.422771	yes	UP	N	N	N	Y	Y	0	0.57
TBIG010206	XLOC_010206	-	-	0	1.51	inf	0.0117	0.422771	yes	UP	N	N	N	Y	Y	0	1.5
TBIG013016	XLOC_013016	Nedd4	E3 ubiquitin-protein ligase NEDD4 [Source:SWISS;Acc:P46935]	0	0.649	inf	0.0117	0.422771	yes	UP	N	N	N	Y	Y	0	0.65
TBIG019887	XLOC_019887	-	-	0	3.87	inf	0.0117	0.422771	yes	UP	N	N	N	Y	Y	0	3.85
TBIG018096	XLOC_018096	-	-	0	61.3	inf	0.0117	0.422771	yes	UP	N	N	N	Y	Y	0	60.99
TBIG020296	XLOC_020296	-	-	0	0.594	inf	0.0117	0.422771	yes	UP	N	N	N	Y	Y	0	0.59
TBIG025345	XLOC_025345	-	-	0	2.07	inf	0.0117	0.422771	yes	UP	N	N	N	Y	Y	0	2.06
TBIG025450	XLOC_025450	-	-	0	1.03	inf	0.0117	0.422771	yes	UP	N	N	N	Y	Y	0	1.02
TBIG027388	XLOC_027388	-	-	0	0.77	inf	0.0117	0.422771	yes	UP	N	N	N	Y	Y	0	0.77
TBIG030283	XLOC_030283	-	-	0	0.61	inf	0.0117	0.422771	yes	UP	N	N	N	Y	Y	0	0.61
TBIG030319	XLOC_030319	-	-	0	1.32	inf	0.0117	0.422771	yes	UP	N	N	N	Y	Y	0	1.31
TBIG017442	XLOC_017442	Cfb	Complement factor B [Source:SWISS;Acc:P04186]	34.6	83.6	1.27	0.01185	0.422771	yes	UP	N	N	N	Y	Y	34.77	83.18
TBIG009418	ENSRNOG00000003666.L01	IGJ	Immunoglobulin joining chain; Uncharacterized protein [Source:UniProtKB/TrEMBL;Acc:G3V6G1]	2.03	25.7	3.66	0.0119	0.422771	yes	UP	N	N	N	Y	Y	2.04	25.6
TBIG003412	XLOC_003412	-	-	0	0.544	inf	0.01205	0.422771	yes	UP	N	N	N	Y	Y	0	0.54
TBIG003448	XLOC_003448	-	-	0	0.583	inf	0.01205	0.422771	yes	UP	N	N	N	Y	Y	0	0.58
TBIG003754	XLOC_003754	-	-	0	0.757	inf	0.01205	0.422771	yes	UP	N	N	N	Y	Y	0	0.75
TBIG003857	XLOC_003857	-	-	0	0.551	inf	0.01205	0.422771	yes	UP	N	N	N	Y	Y	0	0.55
TBIG003956	XLOC_003956	-	-	0	1.57	inf	0.01205	0.422771	yes	UP	N	N	N	Y	Y	0	1.57
TBIG003958	XLOC_003958	Pol	Retrovirus-related Pol polyprotein LINE-1 [Source:SWISS;Acc:P11369]	0	0.775	inf	0.01205	0.422771	yes	UP	N	N	N	Y	Y	0	0.77
TBIG003990	XLOC_003990	-	-	0	1.26	inf	0.01205	0.422771	yes	UP	N	N	N	Y	Y	0	1.25
TBIG006083	XLOC_006083	-	-	0	0.699	inf	0.01205	0.422771	yes	UP	N	N	N	Y	Y	0	0.7
TBIG006213	XLOC_006213	-	-	0	0.555	inf	0.01205	0.422771	yes	UP	N	N	N	Y	Y	0	0.55
TBIG006317	XLOC_006317	-	-	0	0.996	inf	0.01205	0.422771	yes	UP	N	N	N	Y	Y	0	0.99
TBIG006496	XLOC_006496	-	-	0	0.805	inf	0.01205	0.422771	yes	UP	N	N	N	Y	Y	0	0.8
TBIG006537	XLOC_006537	-	-	0	1.05	inf	0.01205	0.422771	yes	UP	N	N	N	Y	Y	0	1.05
TBIG007210	XLOC_007210	-	-	0	0.77	inf	0.01205	0.422771	yes	UP	N	N	N	Y	Y	0	0.77
TBIG007278	XLOC_007278	-	-	0	1.28	inf	0.01205	0.422771	yes	UP	N	N	N	Y	Y	0	1.28
TBIG007326	XLOC_007326	-	-	0	0.68	inf	0.01205	0.422771	yes	UP	N	N	N	Y	Y	0	0.68
TBIG008057	XLOC_008057	-	-	0	1.17	inf	0.01205	0.422771	yes	UP	N	N	N	Y	Y	0	1.16
TBIG008123	XLOC_008123	-	-	0	0.773	inf	0.01205	0.422771	yes	UP	N	N	N	Y	Y	0	0.77
TBIG008124	XLOC_008124	-	-	0	1.03	inf	0.01205	0.422771	yes	UP	N	N	N	Y	Y	0	1.02
TBIG008136	XLOC_008136	-	-	0	4.04	inf	0.01205	0.422771	yes	UP	N	N	N	Y	Y	0	4.02
TBIG008230	XLOC_008230	-	-	0	0.617	inf	0.01205	0.422771	yes	UP	N	N	N	Y	Y	0	0.61
TBIG009152	XLOC_009152	-	-	0	2.85	inf	0.01205	0.422771	yes	UP	N	N	N	Y	Y	0	2.84
TBIG009200	XLOC_009200	-	-	0	0.541	inf	0.01205	0.422771	yes	UP	N	N	N	Y	Y	0	0.54
TBIG010213	XLOC_010213	-	-	0	1.78	inf	0.01205	0.422771	yes	UP	N	N	N	Y	Y	0	1.77
TBIG010274	XLOC_010274	-	-	0	3.31	inf	0.01205	0.422771	yes	UP	N	N	N	Y	Y	0	3.29
TBIG010280	XLOC_010280	-	-	0	2.32	inf	0.01205	0.422771	yes	UP	N	N	N	Y	Y	0	2.31
TBIG011273	XLOC_011273	-	-	0	0.581	inf	0.01205	0.422771	yes	UP	N	N	N	Y	Y	0	0.58
TBIG011302	XLOC_011302	-	-	0	1.56	inf	0.01205	0.422771	yes	UP	N	N	N	Y	Y	0	1.55
TBIG011310	XLOC_011310	-	-	0	0.623	inf	0.01205	0.422771	yes	UP	N	N	N	Y	Y	0	0.62
TBIG011319	XLOC_011319	-	-	0	5.31	inf	0.01205	0.422771	yes	UP	N	N	N	Y	Y	0	5.29
TBIG012099	XLOC_012099	-	-	0	0.83	inf	0.01205	0.422771	yes	UP	N	N	N	Y	Y	0	0.83
TBIG012122	XLOC_012122	pol	Putative Pol polyprotein [Source:SWISS;Acc:P11368]	0	0.761	inf	0.01205	0.422771	yes	UP	N	N	N	Y	Y	0	0.76
TBIG012219	XLOC_012219	-	-	0	0.829	inf	0.01205	0.422771	yes	UP	N	N	N	Y	Y	0	0.82
TBIG013019	XLOC_013019	-	-	0	1.17	inf	0.01205	0.422771	yes	UP	N	N	N	Y	Y	0	1.17
TBIG013037	XLOC_013037	-	-	0	0.542	inf	0.01205	0.422771	yes	UP	N	N	N	Y	Y	0	0.54
TBIG013067	XLOC_013067	-	-	0	5.19	inf	0.01205	0.422771	yes	UP	N	N	N	Y	Y	0	5.17
TBIG013130	XLOC_013130	-	-	0	2.84	inf	0.01205	0.422771	yes	UP	N	N	N	Y	Y	0	2.82
TBIG013237	XLOC_013237	-	-	0	0.867	inf	0.01205	0.422771	yes	UP	N	N	N	Y	Y	0	0.86
TBIG014758	XLOC_014758	-	-	0	1.04	inf	0.01205	0.422771	yes	UP	N	N	N	Y	Y	0	1.03
TBIG014787	XLOC_014787	-	-	0	1.53	inf	0.01205	0.422771	yes	UP	N	N	N	Y	Y	0	1.52
TBIG014852	XLOC_014852	-	-	0	4.86	inf	0.01205	0.422771	yes	UP	N	N	N	Y	Y	0	4.84
TBIG016479	XLOC_016479	Pol	Retrovirus-related Pol polyprotein LINE-1 [Source:SWISS;Acc:P11369]	0	0.87	inf	0.01205	0.422771	yes	UP	N	N	N	Y	Y	0	0.87
TBIG016710	XLOC_016710	-	-	0	0.862	inf	0.01205	0.422771	yes	UP	N	N	N	Y	Y	0	0.86
TBIG016771	XLOC_016771	-	-	0	0.764	inf	0.01205	0.422771	yes	UP	N	N	N	Y	Y	0	0.76
TBIG019920	XLOC_019920	-	-	0	2.09	inf	0.01205	0.422771	yes	UP	N	N	N	Y	Y	0	2.08
TBIG018072	ENSRNOG00000031292	LOC100365438	mCG141619-like [Source:RGD Symbol;Acc:2319042]	0	3.42	inf	0.01205	0.422771	yes	UP	N	N	N	Y	Y	0	3.4
TBIG018097	XLOC_018097	Gm5571	Ig kappa chain V-V region MOPC 41 [Source:SWISS;Acc:P01639]	0	4.04	inf	0.01205	0.422771	yes	UP	N	N	N	Y	Y	0	4.02
TBIG020097	XLOC_020097	-	-	0	0.531	inf	0.01205	0.422771	yes	UP	N	N	N	Y	Y	0	0.53
TBIG020156	XLOC_020156	-	-	0	1.15	inf	0.01205	0.422771	yes	UP	N	N	N	Y	Y	0	1.15
TBIG019522	XLOC_019522	ATP8B4	Probable phospholipid-transporting ATPase IM [Source:SWISS;Acc:Q8TF62]	0	4.42	inf	0.01205	0.422771	yes	UP	N	N	N	Y	Y	0	4.4
TBIG020206	XLOC_020206	-	-	0	2.78	inf	0.01205	0.422771	yes	UP	N	N	N	Y	Y	0	2.77
TBIG020302	XLOC_020302	-	-	0	1.11	inf	0.01205	0.422771	yes	UP	N	N	N	Y	Y	0	1.11
TBIG021892	XLOC_021892	-	-	0	1.61	inf	0.01205	0.422771	yes	UP	N	N	N	Y	Y	0	1.6
TBIG022220	XLOC_022220	-	-	0	0.739	inf	0.01205	0.422771	yes	UP	N	N	N	Y	Y	0	0.74
TBIG023851	XLOC_023851	-	-	0	0.739	inf	0.01205	0.422771	yes	UP	N	N	N	Y	Y	0	0.74
TBIG023894	XLOC_023894	-	-	0	1.62	inf	0.01205	0.422771	yes	UP	N	N	N	Y	Y	0	1.61
TBIG023967	XLOC_023967	-	-	0	1.18	inf	0.01205	0.422771	yes	UP	N	N	N	Y	Y	0	1.18
TBIG024034	XLOC_024034	-	-	0	2.7	inf	0.01205	0.422771	yes	UP	N	N	N	Y	Y	0	2.69
TBIG024112	XLOC_024112	-	-	0	0.605	inf	0.01205	0.422771	yes	UP	N	N	N	Y	Y	0	0.6
TBIG024182	XLOC_024182	-	-	0	0.58	inf	0.01205	0.422771	yes	UP	N	N	N	Y	Y	0	0.58
TBIG024210	XLOC_024210	-	-	0	0.817	inf	0.01205	0.422771	yes	UP	N	N	N	Y	Y	0	0.81
TBIG025289	XLOC_025289	-	-	0	0.706	inf	0.01205	0.422771	yes	UP	N	N	N	Y	Y	0	0.7
TBIG025414	XLOC_025414	-	-	0	0.972	inf	0.01205	0.422771	yes	UP	N	N	N	Y	Y	0	0.97
TBIG025533	XLOC_025533	POK4_HUMAN	HERV-K_6q14.1 provirus ancestral Gag-Pol polyprotein [Source:SWISS;Acc:P63128]	0	0.586	inf	0.01205	0.422771	yes	UP	N	N	N	Y	Y	0	0.58
TBIG027185	XLOC_027185	-	-	0	0.56	inf	0.01205	0.422771	yes	UP	N	N	N	Y	Y	0	0.56
TBIG027220	XLOC_027220	-	-	0	2.07	inf	0.01205	0.422771	yes	UP	N	N	N	Y	Y	0	2.06
TBIG027310	XLOC_027310	-	-	0	1.37	inf	0.01205	0.422771	yes	UP	N	N	N	Y	Y	0	1.36
TBIG027382	XLOC_027382	-	-	0	2.37	inf	0.01205	0.422771	yes	UP	N	N	N	Y	Y	0	2.35
TBIG028962	XLOC_028962	-	-	0	0.565	inf	0.01205	0.422771	yes	UP	N	N	N	Y	Y	0	0.56
TBIG029003	XLOC_029003	-	-	0	2.82	inf	0.01205	0.422771	yes	UP	N	N	N	Y	Y	0	2.81
TBIG029079	XLOC_029079	-	-	0	0.723	inf	0.01205	0.422771	yes	UP	N	N	N	Y	Y	0	0.72
TBIG030324	XLOC_030324	-	-	0	0.745	inf	0.01205	0.422771	yes	UP	N	N	N	Y	Y	0	0.74
TBIG030417	XLOC_030417	-	-	0	0.846	inf	0.01205	0.422771	yes	UP	N	N	N	Y	Y	0	0.84
TBIG031508	XLOC_031508	Pol	Retrovirus-related Pol polyprotein LINE-1 [Source:SWISS;Acc:P11369]	0	0.63	inf	0.01205	0.422771	yes	UP	N	N	N	Y	Y	0	0.63
TBIG012285	ENSRNOG00000018651.L01	Agtpbp1	ATP/GTP binding protein 1 [Source:RGD Symbol;Acc:1306307]	7.1	18.9	1.41	0.01225	0.427811	yes	UP	N	N	N	Y	Y	7.13	18.83
TBIG000628	ENSRNOG00000021109.L01	Ccdc114	coiled-coil domain containing 114 [Source:RGD Symbol;Acc:1308141]	1.21	7.4	2.61	0.0126	0.437885	yes	UP	N	N	N	Y	Y	1.22	7.36
TBIG022599	ENSRNOG00000037795.L01	Ldlrad1	low density lipoprotein receptor class A domain containing 1 [Source:RGD Symbol;Acc:1597398]	6.92	22.3	1.69	0.0129	0.442369	yes	UP	N	N	N	Y	Y	6.96	22.22
TBIG002748	ENSRNOG00000019206	Nupr1	nuclear protein, transcriptional regulator, 1 [Source:RGD Symbol;Acc:69363]	94.9	233	1.29	0.01315	0.446904	yes	UP	N	N	N	Y	Y	95.36	231.74
TBIG027728	ENSRNOG00000006663.L01	Usp2	ubiquitin specific peptidase 2 [Source:RGD Symbol;Acc:621073]	5.98	15.6	1.39	0.01315	0.446904	yes	UP	N	N	N	Y	Y	6.01	15.56
TBIG028040	ENSRNOG00000015718.L01	RGD1307461	similar to RIKEN cDNA 6430571L13 gene; similar to g20 protein [Source:RGD Symbol;Acc:1307461]	3.25	10.3	1.67	0.01315	0.446904	yes	UP	N	N	N	Y	Y	3.27	10.29
TBIG009855	ENSRNOG00000002120.L01	Spata18	spermatogenesis associated 18 [Source:RGD Symbol;Acc:735208]	1.8	6.19	1.78	0.0132	0.447934	yes	UP	N	N	N	Y	Y	1.81	6.16
TBIG022569	ENSRNOG00000009889	Pgm1	phosphoglucomutase 1 [Source:RGD Symbol;Acc:3316]	32.3	78.5	1.28	0.01375	0.460423	yes	UP	N	N	N	Y	Y	32.43	78.14
TBIG002269	ENSRNOG00000028781.L01	Abcc6	ATP-binding cassette, subfamily C (CFTR/MRP), member 6 [Source:RGD Symbol;Acc:620268]	0.163	1.26	2.96	0.01405	0.468402	yes	UP	N	N	N	Y	Y	0.16	1.26
TBIG022778	ENSRNOG00000012879	Fabp3	fatty acid binding protein 3, muscle and heart [Source:RGD Symbol;Acc:69048]	138	376	1.45	0.0141	0.469382	yes	UP	N	N	N	Y	Y	138.58	374.23
TBIG023729	ENSRNOG00000020132.L01	Ttll10	tubulin tyrosine ligase-like family, member 10 [Source:RGD Symbol;Acc:1560839]	6.15	15.6	1.35	0.0143	0.473143	yes	UP	N	N	N	Y	Y	6.18	15.55
TBIG020448	ENSRNOG00000012932.L01	Ccdc146	coiled-coil domain containing 146 [Source:RGD Symbol;Acc:1559535]	1.4	7.42	2.4	0.01435	0.473143	yes	UP	N	N	N	Y	Y	1.41	7.38
TBIG008524	ENSRNOG00000034221.L01	RGD1562658	similar to RIKEN cDNA 1700009P17 [Source:RGD Symbol;Acc:1562658]	6.12	20.5	1.75	0.01445	0.474102	yes	UP	N	N	N	Y	Y	6.15	20.42
TBIG016322	ENSRNOG00000029726	Gstm1	glutathione S-transferase mu 1 [Source:RGD Symbol;Acc:2755]	23.2	60.1	1.37	0.01465	0.477225	yes	UP	N	N	N	Y	Y	23.34	59.8
TBIG000359	ENSRNOG00000016603.L01	Rtn2	reticulon 2 [Source:RGD Symbol;Acc:1303245]	55.1	134	1.28	0.01495	0.485608	yes	UP	N	N	N	Y	Y	55.4	132.99
TBIG018027	ENSRNOG00000049056.L01	Ak1	adenylate kinase 1 [Source:MGI Symbol;Acc:MGI:87977]	26.1	60.7	1.22	0.015	0.485846	yes	UP	N	N	N	Y	Y	26.22	60.45
TBIG011005	ENSRNOG00000010798.L01	Blk	BLK proto-oncogene, Src family tyrosine kinase [Source:RGD Symbol;Acc:1308859]	0.36	3.06	3.09	0.0151	0.487698	yes	UP	N	N	N	Y	Y	0.36	3.04
TBIG029370	ENSRNOG00000046426.L01	Ankrd66	ankyrin repeat domain 66 [Source:RGD Symbol;Acc:1560151]	2.4	11	2.2	0.0151	0.487698	yes	UP	N	N	N	Y	Y	2.42	10.96
TBIG025737	ENSRNOG00000032951	Jsrp1	junctional sarcoplasmic reticulum protein 1 [Source:RGD Symbol;Acc:1596084]	34.1	81.7	1.26	0.0152	0.488847	yes	UP	N	N	N	Y	Y	34.3	81.31
TBIG028431	ENSRNOG00000029980.L01	Zbtb16	zinc finger and BTB domain containing 16 [Source:RGD Symbol;Acc:727921]	2.6	6.74	1.37	0.0153	0.491118	yes	UP	N	N	N	Y	Y	2.62	6.71
TBIG006819	ENSRNOG00000025014	RGD1563956	similar to 60S ribosomal protein L12 [Source:RGD Symbol;Acc:1563956]	0	0.922	inf	0.0154	0.491118	yes	UP	N	N	N	Y	Y	0	0.92
TBIG015753	XLOC_015753	-	-	0	0.922	inf	0.0154	0.491118	yes	UP	N	N	N	Y	Y	0	0.92
TBIG018067	ENSRNOG00000048070	AABR06022402.1	Uncharacterized protein [Source:UniProtKB/TrEMBL;Acc:F1M1R0]	0	1.77	inf	0.0154	0.491118	yes	UP	N	N	N	Y	Y	0	1.76
TBIG018073	ENSRNOG00000050066	AABR06022428.1	Uncharacterized protein [Source:UniProtKB/TrEMBL;Acc:D4ADL1]	0	2.5	inf	0.0154	0.491118	yes	UP	N	N	N	Y	Y	0	2.49
TBIG019723	ENSRNOG00000036802.L01	Snhg11	small nucleolar RNA host gene 11 (non-protein coding) [Source:RGD Symbol;Acc:1563912]	5.18	13.3	1.36	0.0154	0.491118	yes	UP	N	N	N	Y	Y	5.21	13.22
TBIG010013	ENSRNOG00000013532	Pgam2	phosphoglycerate mutase 2 (muscle) [Source:RGD Symbol;Acc:3313]	412	1140	1.47	0.0155	0.492926	yes	UP	N	N	N	Y	Y	414	1138.88
TBIG021294	ENSRNOG00000021855.L01	Kcp	kielin/chordin-like protein [Source:RGD Symbol;Acc:1561119]	3.26	13.6	2.06	0.01555	0.49356	yes	UP	N	N	N	Y	Y	3.28	13.48
TBIG019792	ENSRNOG00000006052.L01	Sulf2	sulfatase 2 [Source:RGD Symbol;Acc:1305078]	10.5	25.6	1.28	0.0156	0.49356	yes	UP	N	N	N	Y	Y	10.58	25.49
TBIG003378	XLOC_003378	-	-	0	0.514	inf	0.01565	0.49356	yes	UP	N	N	N	Y	Y	0	0.51
TBIG008414	ENSRNOG00000046231.L01	Cacna1s	calcium channel, voltage-dependent, L type, alpha 1S subunit [Source:RGD Symbol;Acc:70983]	22.3	53.5	1.26	0.01565	0.49356	yes	UP	N	N	N	Y	Y	22.41	53.19
TBIG017700	XLOC_017700	-	-	0	15	inf	0.01565	0.49356	yes	UP	N	N	N	Y	Y	0	14.89
TBIG020738	ENSRNOG00000038376	LOC100361952	hypothetical protein LOC100361952 [Source:RGD Symbol;Acc:2319128]	0	2.73	inf	0.01565	0.49356	yes	UP	N	N	N	Y	Y	0	2.72
TBIG007043	ENSRNOG00000002976.L01	Maats1	MYCBP-associated, testis expressed 1 [Source:RGD Symbol;Acc:1305539]	0.712	4.06	2.51	0.016	0.501818	yes	UP	N	N	N	Y	Y	0.71	4.04
TBIG012656	ENSRNOG00000012040.L01	Slc25a48	solute carrier family 25, member 48 [Source:RGD Symbol;Acc:1563703]	2.85	9.78	1.78	0.016	0.501818	yes	UP	N	N	N	Y	Y	2.87	9.73
TBIG007115	XLOC_007115	-	-	0.24	4.6	4.26	0.01615	0.504438	yes	UP	N	N	N	Y	Y	0.24	4.58
TBIG016964	XLOC_016964	-	-	0	0.968	inf	0.01625	0.505482	yes	UP	N	N	N	Y	Y	0	0.96
TBIG004344	ENSRNOG00000020459.L01	Rgs11	regulator of G-protein signaling 11 [Source:RGD Symbol;Acc:3563]	10.7	27.2	1.35	0.01635	0.507206	yes	UP	N	N	N	Y	Y	10.73	27.02
TBIG023248	ENSRNOG00000008005.L01	Akna	AT-hook transcription factor [Source:RGD Symbol;Acc:1308202]	2.47	7.38	1.58	0.0164	0.508065	yes	UP	N	N	N	Y	Y	2.48	7.35
TBIG005492	ENSRNOG00000021356.L01	Dnah2	dynein, axonemal, heavy chain 2 [Source:RGD Symbol;Acc:1565087]	2.65	9.95	1.91	0.0165	0.509776	yes	UP	N	N	N	Y	Y	2.66	9.91
TBIG005703	ENSRNOG00000007957.L01	Bzrap1	benzodiazepine receptor (peripheral) associated protein 1 [Source:RGD Symbol;Acc:708563]	2.7	6.89	1.35	0.01655	0.509937	yes	UP	N	N	N	Y	Y	2.71	6.85
TBIG023420	ENSRNOG00000007037.L01	LOC679641	similar to CG4329-PA, isoform A [Source:RGD Symbol;Acc:1585948]	0.604	3.52	2.54	0.01655	0.509937	yes	UP	N	N	N	Y	Y	0.61	3.5
TBIG017566	ENSRNOG00000028356	Chchd10	coiled-coil-helix-coiled-coil-helix domain containing 10 [Source:RGD Symbol;Acc:1359417]	202	472	1.23	0.01665	0.512325	yes	UP	N	N	N	Y	Y	202.66	469.34
TBIG023438	ENSRNOG00000008560.L01	Ccdc30	coiled-coil domain containing 30 [Source:RGD Symbol;Acc:1305604]	2.77	10.5	1.92	0.0167	0.51317	yes	UP	N	N	N	Y	Y	2.79	10.46
TBIG023710	ENSRNOG00000013468.L01	Fam213b	family with sequence similarity 213, member B [Source:RGD Symbol;Acc:1308251]	12.2	41.1	1.75	0.0168	0.514853	yes	UP	N	N	N	Y	Y	12.3	40.94
TBIG006861	ENSRNOG00000001873.L01	P2rx6	purinergic receptor P2X, ligand-gated ion channel, 6 [Source:RGD Symbol;Acc:3243]	6.36	19.2	1.59	0.0172	0.524289	yes	UP	N	N	N	Y	Y	6.39	19.06
TBIG017555	ENSRNOG00000012714	RGD1564149	similar to Protein C21orf58 [Source:RGD Symbol;Acc:1564149]	2.52	10.3	2.02	0.01725	0.524409	yes	UP	N	N	N	Y	Y	2.54	10.22
TBIG004717	ENSRNOG00000010337.L01	Slc13a2	solute carrier family 13 (sodium-dependent dicarboxylate transporter), member 2 [Source:RGD Symbol;Acc:61920]	3.41	11.9	1.8	0.0175	0.529183	yes	UP	N	N	N	Y	Y	3.42	11.8
TBIG028399	XLOC_028399	Nlrx1	NLR family member X1 [Source:SWISS;Acc:Q5FVQ8]	18.4	46.6	1.34	0.01765	0.533011	yes	UP	N	N	N	Y	Y	18.53	46.34
TBIG014243	ENSRNOG00000022721.L01	Clec18a	C-type lectin domain family 18, member A [Source:RGD Symbol;Acc:1559899]	0.126	3.31	4.72	0.0179	0.538419	yes	UP	N	N	N	Y	Y	0.13	3.3
TBIG028044	ENSRNOG00000021602.L01	Zmynd10	zinc finger, MYND-type containing 10 [Source:RGD Symbol;Acc:1303250]	9.7	25	1.37	0.01795	0.53921	yes	UP	N	N	N	Y	Y	9.74	24.89
TBIG019560	ENSRNOG00000021241.L01	Gfra4	GDNF family receptor alpha 4 [Source:RGD Symbol;Acc:620503]	0.937	5.01	2.42	0.018	0.539289	yes	UP	N	N	N	Y	Y	0.94	4.98
TBIG020924	ENSRNOG00000009032.L01	Ttll3	tubulin tyrosine ligase-like family, member 3 [Source:RGD Symbol;Acc:1311255]	3.2	10.4	1.71	0.0183	0.546839	yes	UP	N	N	N	Y	Y	3.22	10.39
TBIG018616	ENSRNOG00000011028.L01	RGD1311519	hypothetical LOC311496 [Source:RGD Symbol;Acc:1311519]	0.462	2.96	2.68	0.0184	0.548387	yes	UP	N	N	N	Y	Y	0.46	2.95
TBIG026058	ENSRNOG00000009336.L01	Mapk15	mitogen-activated protein kinase 15 [Source:RGD Symbol;Acc:628675]	2.04	9.25	2.18	0.01845	0.548496	yes	UP	N	N	N	Y	Y	2.05	9.21
TBIG005923	ENSRNOG00000012134.L01	Scn4a	sodium channel, voltage-gated, type IV, alpha subunit [Source:RGD Symbol;Acc:3636]	7.87	19	1.27	0.0185	0.548496	yes	UP	N	N	N	Y	Y	7.91	18.92
TBIG010686	ENSRNOG00000038074	LOC498555	similar to 60S acidic ribosomal protein P2 [Source:RGD Symbol;Acc:1590791]	115	282	1.29	0.0185	0.548496	yes	UP	N	N	N	Y	Y	115.75	280.85
TBIG001809	XLOC_001809	T	Brachyury protein [Source:SWISS;Acc:P20293]	9.85	50.5	2.36	0.01855	0.54855	yes	UP	N	N	N	Y	Y	9.9	50.3
TBIG016429	ENSRNOG00000014893.L01	Wdr63	WD repeat domain 63 [Source:RGD Symbol;Acc:1563105]	1	4.03	2.01	0.01855	0.54855	yes	UP	N	N	N	Y	Y	1.01	4.01
TBIG029725	XLOC_029725	-	-	1.2	5.83	2.28	0.0191	0.559726	yes	UP	N	N	N	Y	Y	1.21	5.8
TBIG029571	XLOC_029571	-	-	5.09	14.1	1.47	0.0192	0.561933	yes	UP	N	N	N	Y	Y	5.11	14.02
TBIG005063	ENSRNOG00000050151.L01	Ccdc40	coiled-coil domain containing 40 [Source:RGD Symbol;Acc:1592118]	0.71	3.1	2.13	0.01935	0.564148	yes	UP	N	N	N	Y	Y	0.71	3.08
TBIG014371	ENSRNOG00000025860.L01	Ccdc135	coiled-coil domain containing 135 [Source:RGD Symbol;Acc:1565601]	1.5	7.24	2.27	0.01935	0.564148	yes	UP	N	N	N	Y	Y	1.51	7.2
TBIG011976	ENSRNOG00000018241.L01	Ank1	ankyrin 1, erythrocytic [Source:RGD Symbol;Acc:1309620]	35.6	82.9	1.22	0.01945	0.564893	yes	UP	N	N	N	Y	Y	35.81	82.54
TBIG004329	ENSRNOG00000018792.L01	Tekt4	tektin 4 [Source:RGD Symbol;Acc:1308075]	1.1	5.54	2.33	0.01965	0.56925	yes	UP	N	N	N	Y	Y	1.11	5.51
TBIG024886	ENSRNOG00000047455.L01	Cdhr3	cadherin-related family member 3 [Source:MGI Symbol;Acc:MGI:1916014]	3.64	20.6	2.5	0.0197	0.569973	yes	UP	N	N	N	Y	Y	3.66	20.52
TBIG014560	ENSRNOG00000012428.L01	Maf	v-maf avian musculoaponeurotic fibrosarcoma oncogene homolog [Source:RGD Symbol;Acc:3034]	5.38	13.8	1.36	0.02035	0.583553	yes	UP	N	N	N	Y	Y	5.41	13.72
TBIG015522	ENSRNOG00000018656.L01	Ampd1	adenosine monophosphate deaminase 1 [Source:RGD Symbol;Acc:2109]	31.3	84.6	1.44	0.0204	0.583553	yes	UP	N	N	N	Y	Y	31.45	84.25
TBIG002054	ENSRNOG00000037814.L01	Cxcl17	chemokine (C-X-C motif) ligand 17 [Source:RGD Symbol;Acc:1304717]	20.8	55.3	1.41	0.0205	0.584212	yes	UP	N	N	N	Y	Y	20.94	55.01
TBIG005781	ENSRNOG00000004518.L01	Cacnb1	calcium channel, voltage-dependent, beta 1 subunit [Source:RGD Symbol;Acc:68382]	4.23	11.3	1.42	0.02085	0.589706	yes	UP	N	N	N	Y	Y	4.25	11.25
TBIG030306	XLOC_030306	pol	Pol polyprotein [Source:SWISS;Acc:P31795]	1.36	6.96	2.36	0.02085	0.589706	yes	UP	N	N	N	Y	Y	1.36	6.93
TBIG025266	ENSRNOG00000050830	AABR06046667.1	Uncharacterized protein [Source:UniProtKB/TrEMBL;Acc:M0R560]	0	3.84	inf	0.021	0.591795	yes	UP	N	N	N	Y	Y	0	3.82
TBIG023082	ENSRNOG00000009061.L01	RGD1310641	similar to hypothetical protein [Source:RGD Symbol;Acc:1310641]	1.94	7.9	2.03	0.02105	0.59191	yes	UP	N	N	N	Y	Y	1.95	7.86
TBIG013555	XLOC_013555	-	-	0.424	3	2.82	0.02115	0.59191	yes	UP	N	N	N	Y	Y	0.43	2.98
TBIG003578	XLOC_003578	-	-	0	0.656	inf	0.02155	0.59191	yes	UP	N	N	N	Y	Y	0	0.65
TBIG000391	ENSRNOG00000020125	LOC100913063	B-cell antigen receptor complex-associated protein alpha chain-like [Source:RGD Symbol;Acc:6484896]	0	0.601	inf	0.02155	0.59191	yes	UP	N	N	N	Y	Y	0	0.6
TBIG002144	ENSRNOG00000002340	LOC100361079	ribosomal protein L36-like [Source:RGD Symbol;Acc:2320881]	0	1.97	inf	0.02155	0.59191	yes	UP	N	N	N	Y	Y	0	1.96
TBIG008076	XLOC_008076	-	-	0	3.7	inf	0.02155	0.59191	yes	UP	N	N	N	Y	Y	0	3.69
TBIG011037	ENSRNOG00000011177	Sftpc	surfactant protein C [Source:RGD Symbol;Acc:3666]	0	0.511	inf	0.02155	0.59191	yes	UP	N	N	N	Y	Y	0	0.51
TBIG011041	ENSRNOG00000025638	Npm2	nucleophosmin/nucleoplasmin 2 [Source:RGD Symbol;Acc:727816]	0	0.729	inf	0.02155	0.59191	yes	UP	N	N	N	Y	Y	0	0.73
TBIG012773	ENSRNOG00000045599	AABR06091206.1	Uncharacterized protein [Source:UniProtKB/TrEMBL;Acc:D3ZE08]	0	1.73	inf	0.02155	0.59191	yes	UP	N	N	N	Y	Y	0	1.72
TBIG016604	XLOC_016604	-	-	0	0.853	inf	0.02155	0.59191	yes	UP	N	N	N	Y	Y	0	0.85
TBIG020275	XLOC_020275	-	-	0	0.9	inf	0.02155	0.59191	yes	UP	N	N	N	Y	Y	0	0.9
TBIG021395	XLOC_021395	-	-	0	2.97	inf	0.02155	0.59191	yes	UP	N	N	N	Y	Y	0	2.95
TBIG025219	ENSRNOG00000048745	AABR06046576.1	Uncharacterized protein [Source:UniProtKB/TrEMBL;Acc:M0R9F4]	0	1.5	inf	0.02155	0.59191	yes	UP	N	N	N	Y	Y	0	1.49
TBIG030440	XLOC_030440	Wibg	Partner of Y14 and mago [Source:SWISS;Acc:Q8CHP5]	0	0.54	inf	0.02155	0.59191	yes	UP	N	N	N	Y	Y	0	0.54
TBIG013480	ENSRNOG00000018712.L01	CAMK2A	Uncharacterized protein [Source:UniProtKB/TrEMBL;Acc:F1LZG4]	3.88	9.56	1.3	0.0219	0.598635	yes	UP	N	N	N	Y	Y	3.9	9.52
TBIG010263	XLOC_010263	-	-	0.471	2.22	2.24	0.02215	0.600423	yes	UP	N	N	N	Y	Y	0.47	2.21
TBIG024636	ENSRNOG00000004762.L01	Ak7	adenylate kinase 7 [Source:RGD Symbol;Acc:1309600]	1.4	5.56	1.99	0.0222	0.601063	yes	UP	N	N	N	Y	Y	1.41	5.54
TBIG017880	XLOC_017880	-	-	0.359	2.38	2.73	0.0226	0.608903	yes	UP	N	N	N	Y	Y	0.36	2.37
TBIG014010	XLOC_014010	-	-	0.549	3.72	2.76	0.023	0.616855	yes	UP	N	N	N	Y	Y	0.55	3.7
TBIG005003	ENSRNOG00000003105.L01	Kif19	kinesin family member 19 [Source:RGD Symbol;Acc:1559936]	1.05	5.72	2.45	0.02365	0.630574	yes	UP	N	N	N	Y	Y	1.06	5.69
TBIG001329	ENSRNOG00000021174	Macrod1	MACRO domain containing 1 [Source:RGD Symbol;Acc:628701]	59	133	1.17	0.02435	0.646966	yes	UP	N	N	N	Y	Y	59.22	131.93
TBIG004768	ENSRNOG00000002598.L01	Hnf1b	HNF1 homeobox B [Source:RGD Symbol;Acc:3830]	0.516	5.35	3.38	0.0244	0.647356	yes	UP	N	N	N	Y	Y	0.52	5.33
TBIG017312	XLOC_017312	AK9	Adenylate kinase 9 [Source:SWISS;Acc:Q5TCS8]	1.8	7.78	2.11	0.02445	0.647356	yes	UP	N	N	N	Y	Y	1.8	7.74
TBIG024802	ENSRNOG00000006146	Trim54	tripartite motif-containing 54 [Source:RGD Symbol;Acc:1306453]	59	130	1.14	0.02445	0.647356	yes	UP	N	N	N	Y	Y	59.27	129.31
TBIG004844	ENSRNOG00000004939.L01	Ttll6	tubulin tyrosine ligase-like family, member 6 [Source:RGD Symbol;Acc:1311922]	0.259	1.95	2.91	0.02455	0.648496	yes	UP	N	N	N	Y	Y	0.26	1.94
TBIG014116	XLOC_014116	env	Envelope glycoprotein [Source:SWISS;Acc:P21415]	0.522	6.04	3.53	0.0246	0.649064	yes	UP	N	N	N	Y	Y	0.52	6.02
TBIG017576	ENSRNOG00000001311.L01	Rab36	RAB36, member RAS oncogene family [Source:RGD Symbol;Acc:1596098]	1.92	8.2	2.09	0.02485	0.650945	yes	UP	N	N	N	Y	Y	1.93	8.16
TBIG001626	ENSRNOG00000018310.L01	Eno4	enolase family member 4 [Source:RGD Symbol;Acc:1308333]	1.68	6.33	1.92	0.0249	0.650945	yes	UP	N	N	N	Y	Y	1.69	6.31
TBIG026808	ENSRNOG00000016566.L01	Arhgap39	Rho GTPase activating protein 39 [Source:RGD Symbol;Acc:1593158]	4.78	12	1.33	0.02495	0.651316	yes	UP	N	N	N	Y	Y	4.8	11.95
TBIG023115	ENSRNOG00000013320.L01	RGD1561916	similar to testes development-related NYD-SP22 isoform 1 [Source:RGD Symbol;Acc:1561916]	2.2	10.3	2.23	0.0251	0.651684	yes	UP	N	N	N	Y	Y	2.21	10.27
TBIG018709	ENSRNOG00000018997.L01	Myh7b	myosin, heavy chain 7B, cardiac muscle, beta [Source:RGD Symbol;Acc:1307994]	2.12	5.88	1.47	0.0253	0.653894	yes	UP	N	N	N	Y	Y	2.13	5.85
TBIG015548	ENSRNOG00000033162	Chia	chitinase, acidic [Source:RGD Symbol;Acc:1303058]	1.27	8.39	2.73	0.0254	0.654992	yes	UP	N	N	N	Y	Y	1.27	8.36
TBIG014268	XLOC_014268	-	-	0.802	4.97	2.63	0.02575	0.661769	yes	UP	N	N	N	Y	Y	0.81	4.95
TBIG015445	ENSRNOG00000020992	Selenbp1	selenium binding protein 1 [Source:RGD Symbol;Acc:620571]	20.3	46	1.18	0.02625	0.6731	yes	UP	N	N	N	Y	Y	20.41	45.81
TBIG028717	ENSRNOG00000049541	Alas1	aminolevulinate, delta-, synthase 1 [Source:RGD Symbol;Acc:68392]	46.6	101	1.12	0.0265	0.677983	yes	UP	N	N	N	Y	Y	46.8	100.87
TBIG005830	ENSRNOG00000014233	Krt19	keratin 19 [Source:RGD Symbol;Acc:619936]	133	304	1.19	0.0268	0.681835	yes	UP	N	N	N	Y	Y	133.46	302.22
TBIG005002	ENSRNOG00000024523.L01	Dnai2	dynein, axonemal, intermediate chain 2 [Source:RGD Symbol;Acc:1359602]	1.18	4.54	1.95	0.0269	0.681835	yes	UP	N	N	N	Y	Y	1.18	4.52
TBIG025925	ENSRNOG00000005491.L01	Best3	bestrophin 3 [Source:RGD Symbol;Acc:1305439]	0.563	2.06	1.87	0.02695	0.681835	yes	UP	N	N	N	Y	Y	0.57	2.05
TBIG013664	ENSRNOG00000039522.L01	RGD1565779	similar to hypothetical protein E230025N22 [Source:RGD Symbol;Acc:1565779]	5.13	20.7	2.01	0.0274	0.690153	yes	UP	N	N	N	Y	Y	5.15	20.57
TBIG004574	ENSRNOG00000026548	Dhrs7c	dehydrogenase/reductase (SDR family) member 7C [Source:RGD Symbol;Acc:1306989]	60.2	130	1.1	0.0277	0.695401	yes	UP	N	N	N	Y	Y	60.54	128.94
TBIG001042	ENSRNOG00000017842.L01	Scnn1g	sodium channel, non-voltage-gated 1, gamma subunit [Source:RGD Symbol;Acc:3641]	1.98	6.47	1.71	0.0279	0.697831	yes	UP	N	N	N	Y	Y	1.99	6.44
TBIG002945	ENSRNOG00000017512.L01	Aldh3b1	aldehyde dehydrogenase 3 family, member B1 [Source:RGD Symbol;Acc:1359546]	2.26	8.42	1.9	0.02795	0.697831	yes	UP	N	N	N	Y	Y	2.27	8.38
TBIG005406	ENSRNOG00000002873.L01	Fam183b	family with sequence similarity 183, member B [Source:RGD Symbol;Acc:1561932]	4.25	35.5	3.06	0.02795	0.697831	yes	UP	N	N	N	Y	Y	4.27	35.34
TBIG000579	ENSRNOG00000029221	Klk1b3	kallikrein 1-related peptidase B3 [Source:RGD Symbol;Acc:3175]	4.02	17.8	2.14	0.0282	0.701764	yes	UP	N	N	N	Y	Y	4.04	17.68
TBIG015450	ENSRNOG00000021088.L01	Tmod4	tropomodulin 4 [Source:RGD Symbol;Acc:1308940]	55.4	117	1.08	0.0286	0.710166	yes	UP	N	N	N	Y	Y	55.65	116.92
TBIG009007	ENSRNOG00000002504.L01	Spata17	spermatogenesis associated 17 [Source:RGD Symbol;Acc:1565282]	0.985	7.62	2.95	0.029	0.71775	yes	UP	N	N	N	Y	Y	0.99	7.58
TBIG010174	XLOC_010174	-	-	2.28	10.1	2.15	0.02905	0.718207	yes	UP	N	N	N	Y	Y	2.29	10.04
TBIG016309	ENSRNOG00000050924.L01	Kcnc4	potassium voltage gated channel, Shaw-related subfamily, member 4 [Source:RGD Symbol;Acc:1589169]	3.88	10.7	1.47	0.0292	0.719571	yes	UP	N	N	N	Y	Y	3.9	10.68
TBIG028284	ENSRNOG00000013027.L01	Rgl3	ral guanine nucleotide dissociation stimulator-like 3 [Source:RGD Symbol;Acc:1309756]	3.16	8.8	1.48	0.02935	0.72015	yes	UP	N	N	N	Y	Y	3.17	8.75
TBIG030289	XLOC_030289	-	-	0.392	2.47	2.66	0.02935	0.72015	yes	UP	N	N	N	Y	Y	0.39	2.46
TBIG006862	XLOC_006862	pol	Pol polyprotein [Source:SWISS;Acc:P11227]	0.107	1.61	3.91	0.02955	0.722721	yes	UP	N	N	N	Y	Y	0.11	1.6
TBIG014267	ENSRNOG00000013676.L01	Plcg2	phospholipase C, gamma 2 [Source:RGD Symbol;Acc:3348]	3.55	8.76	1.3	0.02965	0.724389	yes	UP	N	N	N	Y	Y	3.57	8.71
TBIG027423	XLOC_027423	Pol	Retrovirus-related Pol polyprotein LINE-1 [Source:SWISS;Acc:P11369]	1.33	8.05	2.6	0.0301	0.733024	yes	UP	N	N	N	Y	Y	1.34	8.01
TBIG026098	ENSRNOG00000008897.L01	Gga1	golgi associated, gamma adaptin ear containing, ARF binding protein 1 [Source:RGD Symbol;Acc:1307770]	35.5	72.9	1.04	0.0308	0.746081	yes	UP	N	N	N	Y	Y	35.63	72.51
TBIG019177	ENSRNOG00000018485.L01	Gpr155	G protein-coupled receptor 155 [Source:RGD Symbol;Acc:1309162]	9.13	19.6	1.1	0.03085	0.746498	yes	UP	N	N	N	Y	Y	9.17	19.49
TBIG030790	ENSRNOG00000002800.L01	Gdpd2	glycerophosphodiester phosphodiesterase domain containing 2 [Source:RGD Symbol;Acc:1560780]	12.1	27.1	1.17	0.0311	0.747403	yes	UP	N	N	N	Y	Y	12.12	26.93
TBIG005937	ENSRNOG00000003245	Cacng1	calcium channel, voltage-dependent, gamma subunit 1 [Source:RGD Symbol;Acc:2249]	16.1	38.9	1.27	0.0312	0.747815	yes	UP	N	N	N	Y	Y	16.2	38.7
TBIG005132	ENSRNOG00000002827.L01	Rbfox1	RNA binding protein, fox-1 homolog (C. elegans) 1 [Source:RGD Symbol;Acc:1311210]	19.3	41.4	1.1	0.0314	0.750239	yes	UP	N	N	N	Y	Y	19.45	41.23
TBIG009778	ENSRNOG00000002256	Art3	ADP-ribosyltransferase 3 [Source:RGD Symbol;Acc:628833]	30.6	66.2	1.11	0.0319	0.757814	yes	UP	N	N	N	Y	Y	30.77	65.86
TBIG022275	ENSRNOG00000006110.L01	Jph1	junctophilin 1 [Source:RGD Symbol;Acc:1308789]	8.03	18.2	1.18	0.03195	0.757814	yes	UP	N	N	N	Y	Y	8.06	18.12
TBIG012851	ENSRNOG00000027571.L01	AABR06092040.2	Uncharacterized protein [Source:UniProtKB/TrEMBL;Acc:D3ZVA2]	1.99	8.13	2.03	0.03205	0.759395	yes	UP	N	N	N	Y	Y	2	8.09
TBIG000053	ENSRNOG00000033517	LOC100360791	tumor protein, translationally-controlled 1 [Source:RGD Symbol;Acc:2321467]	2.14	12.3	2.52	0.0323	0.763729	yes	UP	N	N	N	Y	Y	2.15	12.25
TBIG014260	ENSRNOG00000012450.L01	Dynlrb2	dynein light chain roadblock-type 2 [Source:RGD Symbol;Acc:1306930]	9.02	37.9	2.07	0.03245	0.765685	yes	UP	N	N	N	Y	Y	9.06	37.67
TBIG000214	ENSRNOG00000027550.L01	Mzf1	myeloid zinc finger 1 [Source:RGD Symbol;Acc:1308391]	2.15	6.28	1.55	0.03295	0.774274	yes	UP	N	N	N	Y	Y	2.16	6.25
TBIG005254	ENSRNOG00000047321	Hba2	hemoglobin, alpha 2 [Source:RGD Symbol;Acc:1359364]	466	1010	1.11	0.0333	0.777683	yes	UP	N	N	N	Y	Y	468.13	1001.91
TBIG022947	ENSRNOG00000011967.L01	Nphp4	nephronophthisis 4 [Source:RGD Symbol;Acc:1560172]	0.966	3.74	1.95	0.0333	0.777683	yes	UP	N	N	N	Y	Y	0.97	3.72
TBIG015476	ENSRNOG00000021200	Hfe2	hemochromatosis type 2 (juvenile) [Source:RGD Symbol;Acc:1310195]	42.9	90.9	1.08	0.0339	0.783658	yes	UP	N	N	N	Y	Y	43.12	90.46
TBIG000309	ENSRNOG00000048564	LOC100364427	ribosomal protein S12-like [Source:RGD Symbol;Acc:2321033]	1.75	26.2	3.9	0.034	0.785172	yes	UP	N	N	N	Y	Y	1.76	26.03
TBIG023473	ENSRNOG00000011033.L01	Tekt2	tektin 2 (testicular) [Source:RGD Symbol;Acc:1311065]	1.44	6.25	2.12	0.03455	0.79465	yes	UP	N	N	N	Y	Y	1.44	6.22
TBIG016554	XLOC_016554	Capsl	Calcyphosin-like protein [Source:SWISS;Acc:Q6P8Y1]	0.498	2.04	2.03	0.0352	0.801841	yes	UP	N	N	N	Y	Y	0.5	2.03
TBIG014085	ENSRNOG00000014761.L01	Rasd2	RASD family, member 2 [Source:RGD Symbol;Acc:628594]	4.16	10.1	1.29	0.03525	0.801841	yes	UP	N	N	N	Y	Y	4.18	10.09
TBIG017318	XLOC_017318	YF005_HUMAN	Transmembrane protein FLJ37396 [Source:SWISS;Acc:Q8N1W0]	2.96	13.4	2.18	0.03525	0.801841	yes	UP	N	N	N	Y	Y	2.97	13.33
TBIG001157	ENSRNOG00000027240.L01	Kndc1	kinase non-catalytic C-lobe domain (KIND) containing 1 [Source:RGD Symbol;Acc:1565261]	0.85	4.08	2.26	0.0355	0.806722	yes	UP	N	N	N	Y	Y	0.85	4.06
TBIG001586	ENSRNOG00000020339.L01	Neurl1	neuralized E3 ubiquitin protein ligase 1 [Source:RGD Symbol;Acc:1307021]	3.85	9.33	1.28	0.0357	0.808041	yes	UP	N	N	N	Y	Y	3.87	9.28
TBIG004293	XLOC_004293	-	-	0.171	1.35	2.98	0.0357	0.808041	yes	UP	N	N	N	Y	Y	0.17	1.34
TBIG012102	XLOC_012102	-	-	2.49	10.1	2.02	0.036	0.813214	yes	UP	N	N	N	Y	Y	2.5	10.03
TBIG007932	XLOC_007932	DNAH10	Dynein heavy chain 10, axonemal [Source:SWISS;Acc:Q8IVF4]	1.2	4.92	2.03	0.03625	0.81724	yes	UP	N	N	N	Y	Y	1.21	4.89
TBIG003069	ENSRNOG00000020620.L01	Ppp1r32	protein phosphatase 1, regulatory subunit 32 [Source:RGD Symbol;Acc:708532]	0.685	4.9	2.84	0.03645	0.819315	yes	UP	N	N	N	Y	Y	0.69	4.88
TBIG005732	ENSRNOG00000003273.L01	Spata20	spermatogenesis associated 20 [Source:RGD Symbol;Acc:735087]	0.637	2.74	2.1	0.03715	0.827696	yes	UP	N	N	N	Y	Y	0.64	2.72
TBIG014526	ENSRNOG00000023554.L01	AABR06098634.1	Uncharacterized protein [Source:UniProtKB/TrEMBL;Acc:D3ZBX6]	0.222	1.65	2.89	0.0373	0.828403	yes	UP	N	N	N	Y	Y	0.22	1.64
TBIG004906	ENSRNOG00000017473.L01	Ttc25	tetratricopeptide repeat domain 25 [Source:RGD Symbol;Acc:1311859]	1.1	3.74	1.77	0.03735	0.828403	yes	UP	N	N	N	Y	Y	1.11	3.73
TBIG029680	ENSRNOG00000024468.L01	Traf3ip1	TNF receptor-associated factor 3 interacting protein 1 [Source:RGD Symbol;Acc:1309252]	5.77	13.2	1.2	0.0374	0.828403	yes	UP	N	N	N	Y	Y	5.79	13.16
TBIG001071	ENSRNOG00000017403.L01	Apobr	apolipoprotein B receptor [Source:RGD Symbol;Acc:1565169]	1.05	3.07	1.55	0.03745	0.828704	yes	UP	N	N	N	Y	Y	1.06	3.06
TBIG021670	ENSRNOG00000012972.L01	Alox5	arachidonate 5-lipoxygenase [Source:RGD Symbol;Acc:2096]	3.98	10.5	1.4	0.03775	0.832914	yes	UP	N	N	N	Y	Y	4	10.42
TBIG000632	ENSRNOG00000011306	Myod1	myogenic differentiation 1 [Source:RGD Symbol;Acc:631429]	0.203	2.46	3.6	0.03805	0.834681	yes	UP	N	N	N	Y	Y	0.2	2.45
TBIG022867	XLOC_022867	Rps8	40S ribosomal protein S8 [Source:SWISS;Acc:P62243]	0.387	2.05	2.41	0.03805	0.834681	yes	UP	N	N	N	Y	Y	0.39	2.04
TBIG017978	ENSRNOG00000012761.L01	Ak8	adenylate kinase 8 [Source:RGD Symbol;Acc:1303144]	0.206	1.97	3.26	0.0381	0.834973	yes	UP	N	N	N	Y	Y	0.21	1.96
TBIG017622	ENSRNOG00000000563.L01	Adamts14	ADAM metallopeptidase with thrombospondin type 1 motif, 14 [Source:RGD Symbol;Acc:1308899]	1.08	4.16	1.94	0.03865	0.843778	yes	UP	N	N	N	Y	Y	1.09	4.14
TBIG006898	XLOC_006898	-	-	0.208	1.09	2.39	0.039	0.84979	yes	UP	N	N	N	Y	Y	0.21	1.09
TBIG028882	XLOC_028882	-	-	0	1.55	inf	0.03945	0.857134	yes	UP	N	N	N	Y	Y	0	1.55
TBIG023467	ENSRNOG00000024957	Dnali1	dynein, axonemal, light intermediate chain 1 [Source:RGD Symbol;Acc:1309260]	1.29	6.84	2.41	0.0396	0.858736	yes	UP	N	N	N	Y	Y	1.29	6.8
TBIG017671	ENSRNOG00000037668.L01	Ccdc162	coiled-coil domain containing 162 [Source:RGD Symbol;Acc:1561147]	4.68	19.1	2.03	0.03975	0.858736	yes	UP	N	N	N	Y	Y	4.7	19
TBIG027583	ENSRNOG00000020580.L01	LOC500956	hypothetical protein LOC500956 [Source:RGD Symbol;Acc:1565995]	6.85	16.5	1.26	0.03985	0.859266	yes	UP	N	N	N	Y	Y	6.88	16.37
TBIG022808	ENSRNOG00000015476.L01	Ubxn11	UBX domain protein 11 [Source:RGD Symbol;Acc:620769]	3.05	8.55	1.49	0.04035	0.868402	yes	UP	N	N	N	Y	Y	3.07	8.5
TBIG005764	ENSRNOG00000009902	Lrrc46	leucine rich repeat containing 46 [Source:RGD Symbol;Acc:1303311]	2.64	10.3	1.97	0.04045	0.868912	yes	UP	N	N	N	Y	Y	2.65	10.26
TBIG016337	ENSRNOG00000020421.L01	Fndc7	fibronectin type III domain containing 7 [Source:RGD Symbol;Acc:1309189]	0.793	3.03	1.94	0.04065	0.872385	yes	UP	N	N	N	Y	Y	0.8	3.02
TBIG011449	XLOC_011449	FRMPD2	FERM and PDZ domain-containing protein 2 [Source:SWISS;Acc:Q68DX3]	0.303	2.79	3.2	0.0411	0.879555	yes	UP	N	N	N	Y	Y	0.3	2.78
TBIG023251	ENSRNOG00000008930.L01	Tnfsf15	tumor necrosis factor (ligand) superfamily, member 15 [Source:RGD Symbol;Acc:628735]	2.78	6.74	1.28	0.0411	0.879555	yes	UP	N	N	N	Y	Y	2.79	6.71
TBIG027993	ENSRNOG00000013585.L01	Nmnat3	nicotinamide nucleotide adenylyltransferase 3 [Source:RGD Symbol;Acc:1309140]	3.55	10.3	1.53	0.0411	0.879555	yes	UP	N	N	N	Y	Y	3.57	10.23
TBIG021738	ENSRNOG00000015290	Tpi1	triosephosphate isomerase 1 [Source:RGD Symbol;Acc:3896]	100	208	1.05	0.04135	0.881591	yes	UP	N	N	N	Y	Y	100.86	207.47
TBIG023118	ENSRNOG00000047307.L01	Cntfr	ciliary neurotrophic factor receptor [Source:RGD Symbol;Acc:1303100]	6.61	17.1	1.37	0.042	0.891507	yes	UP	N	N	N	Y	Y	6.64	17.02
TBIG003128	ENSRNOG00000013053.L01	Trpm6	transient receptor potential cation channel, subfamily M, member 6 [Source:RGD Symbol;Acc:1309942]	0.424	3.2	2.92	0.04205	0.891507	yes	UP	N	N	N	Y	Y	0.43	3.19
TBIG010735	ENSRNOG00000040171.L01	LOC681383	similar to Protein C10orf11 homolog [Source:RGD Symbol;Acc:1596707]	5.34	27.5	2.36	0.04205	0.891507	yes	UP	N	N	N	Y	Y	5.36	27.36
TBIG012936	ENSRNOG00000026493.L01	Cdnf	cerebral dopamine neurotrophic factor [Source:RGD Symbol;Acc:1307600]	4.3	13.1	1.6	0.04245	0.897481	yes	UP	N	N	N	Y	Y	4.32	13.02
TBIG005604	ENSRNOG00000025287	RGD1565611	RGD1565611 [Source:RGD Symbol;Acc:1565611]	2.82	11.3	2.01	0.0432	0.908277	yes	UP	N	N	N	Y	Y	2.83	11.26
TBIG021864	ENSRNOG00000048961.L01	Bhlhe41	basic helix-loop-helix family, member e41 [Source:RGD Symbol;Acc:70900]	3.27	8.45	1.37	0.0432	0.908277	yes	UP	N	N	N	Y	Y	3.29	8.41
TBIG006606	ENSRNOG00000026870.L01	Clic6	chloride intracellular channel 6 [Source:RGD Symbol;Acc:727938]	3.13	7.6	1.28	0.04345	0.910381	yes	UP	N	N	N	Y	Y	3.15	7.56
TBIG026203	ENSRNOG00000037025	Smgc	submandibular gland protein C [Source:RGD Symbol;Acc:1302995]	6.71	26.6	1.98	0.0435	0.910381	yes	UP	N	N	N	Y	Y	6.75	26.45
TBIG018398	ENSRNOG00000022178.L01	Dcdc5	doublecortin domain containing 5 [Source:RGD Symbol;Acc:1562221]	2.03	7.47	1.88	0.0436	0.911636	yes	UP	N	N	N	Y	Y	2.04	7.44
TBIG002456	ENSRNOG00000033733.L01	Ccdc81	coiled-coil domain containing 81 [Source:RGD Symbol;Acc:1306766]	0.89	4.58	2.37	0.0438	0.913302	yes	UP	N	N	N	Y	Y	0.89	4.56
TBIG028804	ENSRNOG00000019271.L01	Ulk4	unc-51 like kinase 4 [Source:RGD Symbol;Acc:1565726]	1.24	4.46	1.85	0.0438	0.913302	yes	UP	N	N	N	Y	Y	1.24	4.44
TBIG021737	ENSRNOG00000026309.L01	Lrrc23	leucine rich repeat containing 23 [Source:RGD Symbol;Acc:1304779]	1.74	6.92	1.99	0.0439	0.91455	yes	UP	N	N	N	Y	Y	1.74	6.88
TBIG020546	ENSRNOG00000007900	Tspan33	tetraspanin 33 [Source:RGD Symbol;Acc:1560915]	0.506	2.7	2.41	0.04425	0.919318	yes	UP	N	N	N	Y	Y	0.51	2.68
TBIG029772	ENSRNOG00000050430.L01	Vav1	vav 1 guanine nucleotide exchange factor [Source:RGD Symbol;Acc:3951]	1.09	3.58	1.71	0.0444	0.919916	yes	UP	N	N	N	Y	Y	1.1	3.56
TBIG006037	ENSRNOG00000004430.L01	Cep131	centrosomal protein 131 [Source:RGD Symbol;Acc:1307745]	10.7	22.9	1.1	0.04445	0.920115	yes	UP	N	N	N	Y	Y	10.7	22.75
TBIG012333	XLOC_012333	-	-	0.432	3.47	3.01	0.0445	0.920313	yes	UP	N	N	N	Y	Y	0.43	3.46
TBIG017484	ENSRNOG00000025883.L01	Ip6k3	inositol hexaphosphate kinase 3 [Source:MGI Symbol;Acc:MGI:3045325]	1.45	5.44	1.91	0.04455	0.920511	yes	UP	N	N	N	Y	Y	1.46	5.41
TBIG017067	ENSRNOG00000032708.L01	LOC688090	similar to RT1 class II histocompatibility antigen, B-1 beta chain precursor (RT1.B-beta(1)) [Source:RGD Symbol;Acc:1593573]	8.38	20.2	1.27	0.0453	0.929262	yes	UP	N	N	N	Y	Y	8.42	20.12
TBIG009401	ENSRNOG00000022242.L01	Cxcl9	chemokine (C-X-C motif) ligand 9 [Source:RGD Symbol;Acc:628798]	0.546	4.35	2.99	0.046	0.940233	yes	UP	N	N	N	Y	Y	0.55	4.33
TBIG028509	XLOC_028509	Ccdc33	Coiled-coil domain-containing protein 33 [Source:SWISS;Acc:Q5XIR4]	2.05	6.34	1.63	0.04615	0.942453	yes	UP	N	N	N	Y	Y	2.06	6.31
TBIG027614	ENSRNOG00000006931.L01	Eepd1	endonuclease/exonuclease/phosphatase family domain containing 1 [Source:RGD Symbol;Acc:1307401]	8.89	19.2	1.11	0.0462	0.942629	yes	UP	N	N	N	Y	Y	8.93	19.11
TBIG018014	ENSRNOG00000010068.L01	Ppapdc3	phosphatidic acid phosphatase type 2 domain containing 3 [Source:RGD Symbol;Acc:1305821]	13.5	30.2	1.16	0.04665	0.950958	yes	UP	N	N	N	Y	Y	13.57	30.04
TBIG026245	ENSRNOG00000008057.L01	Krt7	keratin 7 [Source:RGD Symbol;Acc:1310865]	21.2	44.1	1.06	0.0467	0.951126	yes	UP	N	N	N	Y	Y	21.26	43.83
TBIG012374	XLOC_012374	-	-	0.455	4.06	3.16	0.0468	0.951461	yes	UP	N	N	N	Y	Y	0.46	4.04
TBIG018639	ENSRNOG00000006767.L01	Cst7	cystatin F (leukocystatin) [Source:RGD Symbol;Acc:1309154]	0.938	5.01	2.42	0.04695	0.952974	yes	UP	N	N	N	Y	Y	0.94	4.98
TBIG028555	ENSRNOG00000015554.L01	Ankdd1a	ankyrin repeat and death domain containing 1A [Source:RGD Symbol;Acc:1586052]	0.675	2.1	1.64	0.047	0.952974	yes	UP	N	N	N	Y	Y	0.68	2.09
TBIG018988	ENSRNOG00000018145	Crat	carnitine O-acetyltransferase [Source:RGD Symbol;Acc:1303031]	55.7	115	1.04	0.0473	0.957466	yes	UP	N	N	N	Y	Y	56.01	114.02
TBIG013676	XLOC_013676	-	-	4.32	12	1.48	0.0474	0.957466	yes	UP	N	N	N	Y	Y	4.34	11.98
TBIG001813	ENSRNOG00000012964.L01	Ccr6	chemokine (C-C motif) receptor 6 [Source:RGD Symbol;Acc:1308562]	0.437	2.07	2.24	0.04745	0.957466	yes	UP	N	N	N	Y	Y	0.44	2.06
TBIG026683	ENSRNOG00000007999	Abra	actin-binding Rho activating protein [Source:RGD Symbol;Acc:708493]	11.1	25.6	1.2	0.0475	0.957466	yes	UP	N	N	N	Y	Y	11.16	25.48
TBIG009629	XLOC_009629	-	-	0.688	3.74	2.44	0.04755	0.957466	yes	UP	N	N	N	Y	Y	0.69	3.72
TBIG004571	ENSRNOG00000031400.L01	Myh13	myosin, heavy chain 13, skeletal muscle [Source:RGD Symbol;Acc:3137]	130	760	2.54	0.04805	0.963115	yes	UP	N	N	N	Y	Y	131.01	756.25
TBIG030037	ENSRNOG00000017248.L01	Prkag3	protein kinase, AMP-activated, gamma 3 non-catalytic subunit [Source:RGD Symbol;Acc:1308698]	4.34	10.6	1.28	0.04825	0.965424	yes	UP	N	N	N	Y	Y	4.36	10.52
TBIG004994	XLOC_004994	-	-	1.74	5.73	1.72	0.0485	0.968724	yes	UP	N	N	N	Y	Y	1.75	5.71
TBIG026776	ENSRNOG00000007668.L01	Mafa	v-maf avian musculoaponeurotic fibrosarcoma oncogene A [Source:RGD Symbol;Acc:1562627]	4.49	11.1	1.3	0.04865	0.970018	yes	UP	N	N	N	Y	Y	4.51	11.02
TBIG007725	XLOC_007725	-	-	0.488	2.95	2.59	0.0488	0.972157	yes	UP	N	N	N	Y	Y	0.49	2.93
TBIG008698	ENSRNOG00000025479.L01	Cfap221	cilia and flagella associated protein 221 [Source:RGD Symbol;Acc:1584968]	0.469	2.38	2.34	0.04915	0.973314	yes	UP	N	N	N	Y	Y	0.47	2.37
TBIG010513	XLOC_010513	TRDC	T-cell receptor delta chain C region [Source:SWISS;Acc:B7Z8K6]	1.9	14.2	2.9	0.04915	0.973314	yes	UP	N	N	N	Y	Y	1.91	14.11
TBIG007565	ENSRNOG00000001055.L01	Rilpl1	Rab interacting lysosomal protein-like 1 [Source:RGD Symbol;Acc:1307973]	40	87.3	1.13	0.04935	0.975434	yes	UP	N	N	N	Y	Y	40.16	86.83
TBIG021860	ENSRNOG00000027630.L01	Casc1	cancer susceptibility candidate 1 [Source:RGD Symbol;Acc:1311213]	8.23	19.1	1.21	0.04965	0.977968	yes	UP	N	N	N	Y	Y	8.27	19

## Sheet: DEG3 Y5-8 vs O1-4
GeneId	GeneAcc	GeneName	Desc	Value_1	Value_2	log2fc	p-value	q-value	DEG:PV=0.05:SELECT	DEG:UP_DOWN	DEG:QV<=0.05	DEG:QV<=0.10	DEG:PV<=0.01	DEG:PV<=0.05	DEG:FC2>=0	EXP:Y5-8:FPKM	EXP:O1-4:FPKM
TBIG005116	ENSRNOG00000021902.L01	Rmi2	RecQ mediated genome instability 2 [Source:RGD Symbol;Acc:1563163]	1.88	0	#NAME?	5e-05	0.0853458	yes	DOWN	N	Y	Y	Y	Y	1.94	0
TBIG010629	ENSRNOG00000015477.L01	Nkx3-1	NK3 homeobox 1 [Source:RGD Symbol;Acc:1305369]	31.4	3.24	-3.28	5e-05	0.0853458	yes	DOWN	N	Y	Y	Y	Y	32.41	3.15
TBIG014233	ENSRNOG00000016953.L01	Chst4	carbohydrate (N-acetylglucosamine 6-O) sulfotransferase 4 [Source:RGD Symbol;Acc:1310798]	32	1.52	-4.39	5e-05	0.0853458	yes	DOWN	N	Y	Y	Y	Y	33	1.48
TBIG015548	ENSRNOG00000033162	Chia	chitinase, acidic [Source:RGD Symbol;Acc:1303058]	80.7	12.5	-2.69	5e-05	0.0853458	yes	DOWN	N	Y	Y	Y	Y	83.23	12.17
TBIG024707	ENSRNOG00000005003.L01	Ptprn2	protein tyrosine phosphatase, receptor type, N polypeptide 2 [Source:RGD Symbol;Acc:61904]	19.1	3.02	-2.66	5e-05	0.0853458	yes	DOWN	N	Y	Y	Y	Y	19.71	2.93
TBIG002891	ENSRNOG00000050181	LOC100911881	chitinase domain-containing protein 1-like [Source:RGD Symbol;Acc:6490147]	1.49	0	#NAME?	0.0001	0.146307	yes	DOWN	N	N	Y	Y	Y	1.53	0
TBIG016644	XLOC_016644	-	-	5.66	0	#NAME?	0.00015	0.20483	yes	DOWN	N	N	Y	Y	Y	5.84	0
TBIG013779	ENSRNOG00000012176.L01	Rab27b	RAB27B, member RAS oncogene family [Source:RGD Symbol;Acc:620114]	15.9	3.19	-2.31	0.0002	0.215611	yes	DOWN	N	N	Y	Y	Y	16.35	3.1
TBIG011678	ENSRNOG00000028636.L01	Xkr5	XK, Kell blood group complex subunit-related family, member 5 [Source:RGD Symbol;Acc:1359335]	0.721	0	#NAME?	0.0003	0.243504	yes	DOWN	N	N	Y	Y	Y	0.74	0
TBIG012474	ENSRNOG00000017514.L01	Btn1a1	butyrophilin, subfamily 1, member A1 [Source:RGD Symbol;Acc:1306984]	12.5	1.54	-3.02	0.0004	0.243504	yes	DOWN	N	N	Y	Y	Y	12.88	1.5
TBIG013600	ENSRNOG00000017159.L01	Dsc3	desmocollin 3 [Source:RGD Symbol;Acc:1311782]	13.4	2.88	-2.22	0.00045	0.243504	yes	DOWN	N	N	Y	Y	Y	13.77	2.79
TBIG013287	ENSRNOG00000016853.L01	Dsg1	desmoglein 1 [Source:RGD Symbol;Acc:1309925]	8.66	0.937	-3.21	0.00055	0.243504	yes	DOWN	N	N	Y	Y	Y	8.93	0.91
TBIG005793	ENSRNOG00000032404.L01	Top2a	topoisomerase (DNA) II alpha [Source:RGD Symbol;Acc:62048]	7.45	1.24	-2.59	0.00075	0.243504	yes	DOWN	N	N	Y	Y	Y	7.68	1.2
TBIG011558	ENSRNOG00000012037.L01	Galnt7	polypeptide N-acetylgalactosaminyltransferase 7 [Source:RGD Symbol;Acc:620362]	62.8	13.6	-2.21	0.00075	0.243504	yes	DOWN	N	N	Y	Y	Y	64.73	13.2
TBIG002838	ENSRNOG00000028137.L01	Mki67	marker of proliferation Ki-67 [Source:RGD Symbol;Acc:1305476]	4.17	0.728	-2.52	0.0008	0.243504	yes	DOWN	N	N	Y	Y	Y	4.3	0.71
TBIG014456	ENSRNOG00000023920	LOC100363196	rCG51614-like [Source:RGD Symbol;Acc:2323544]	0.77	0	#NAME?	0.00085	0.243504	yes	DOWN	N	N	Y	Y	Y	0.79	0
TBIG015429	XLOC_015429	Sprr1a	Cornifin-A [Source:SWISS;Acc:Q63532]	92.2	15	-2.62	0.00085	0.243504	yes	DOWN	N	N	Y	Y	Y	95.01	14.56
TBIG019057	ENSRNOG00000042083	AABR06022401.1	Uncharacterized protein [Source:UniProtKB/TrEMBL;Acc:F1M1Q7]	6.18	0	#NAME?	0.00085	0.243504	yes	DOWN	N	N	Y	Y	Y	6.38	0
TBIG001682	ENSRNOG00000011460.L01	RGD1309903	similar to mKIAA1244 protein [Source:RGD Symbol;Acc:1309903]	2.74	0.342	-3	0.0009	0.243504	yes	DOWN	N	N	Y	Y	Y	2.82	0.33
TBIG003442	XLOC_003442	-	-	0.721	0	#NAME?	0.001	0.243504	yes	DOWN	N	N	Y	Y	Y	0.74	0
TBIG016267	ENSRNOG00000015222.L01	Fam46c	family with sequence similarity 46, member C [Source:RGD Symbol;Acc:1359446]	34.5	8.26	-2.06	0.001	0.243504	yes	DOWN	N	N	Y	Y	Y	35.55	8.02
TBIG020102	XLOC_020102	-	-	1.52	0	#NAME?	0.001	0.243504	yes	DOWN	N	N	Y	Y	Y	1.56	0
TBIG031506	XLOC_031506	-	-	0.709	0	#NAME?	0.001	0.243504	yes	DOWN	N	N	Y	Y	Y	0.73	0
TBIG010129	XLOC_010129	-	-	0.707	0	#NAME?	0.00105	0.243504	yes	DOWN	N	N	Y	Y	Y	0.73	0
TBIG025128	ENSRNOG00000009438	Serpina6	serpin peptidase inhibitor, clade A (alpha-1 antiproteinase, antitrypsin), member 6 [Source:RGD Symbol;Acc:1595901]	0.894	0	#NAME?	0.00115	0.243504	yes	DOWN	N	N	Y	Y	Y	0.92	0
TBIG019177	ENSRNOG00000018485.L01	Gpr155	G protein-coupled receptor 155 [Source:RGD Symbol;Acc:1309162]	41.5	8.94	-2.22	0.00125	0.243504	yes	DOWN	N	N	Y	Y	Y	42.81	8.68
TBIG019016	ENSRNOG00000013973.L01	Lcn2	lipocalin 2 [Source:RGD Symbol;Acc:69408]	68.9	12.9	-2.42	0.00135	0.243504	yes	DOWN	N	N	Y	Y	Y	71.1	12.52
TBIG009434	ENSRNOG00000007183	LOC100360977	TRIMCyp-like [Source:RGD Symbol;Acc:2321083]	111	25.1	-2.14	0.00145	0.243504	yes	DOWN	N	N	Y	Y	Y	114.58	24.38
TBIG026619	ENSRNOG00000007839.L01	Slc16a7	solute carrier family 16 (monocarboxylate transporter), member 7 [Source:RGD Symbol;Acc:3691]	11	1.4	-2.97	0.00145	0.243504	yes	DOWN	N	N	Y	Y	Y	11.31	1.36
TBIG031263	ENSRNOG00000004795.L01	Pof1b	premature ovarian failure 1B [Source:RGD Symbol;Acc:1560798]	27.1	7.5	-1.86	0.0015	0.243504	yes	DOWN	N	N	Y	Y	Y	27.98	7.29
TBIG009184	XLOC_009184	-	-	1.19	0	#NAME?	0.00155	0.243504	yes	DOWN	N	N	Y	Y	Y	1.22	0
TBIG001689	XLOC_001689	Arfgef3	Brefeldin A-inhibited guanine nucleotide-exchange protein 3 [Source:SWISS;Acc:Q3UGY8]	3.08	0	#NAME?	0.00175	0.248925	yes	DOWN	N	N	Y	Y	Y	3.18	0
TBIG018452	ENSRNOG00000045829.L01	Thbs1	thrombospondin 1 [Source:RGD Symbol;Acc:1588455]	21.3	5.66	-1.91	0.00185	0.251207	yes	DOWN	N	N	Y	Y	Y	21.92	5.5
TBIG000447	ENSRNOG00000026244.L01	Nccrp1	non-specific cytotoxic cell receptor protein 1 homolog (zebrafish) [Source:RGD Symbol;Acc:1305932]	13.6	1.76	-2.95	0.0019	0.251207	yes	DOWN	N	N	Y	Y	Y	14.02	1.7
TBIG003438	XLOC_003438	-	-	0.657	0	#NAME?	0.00195	0.251207	yes	DOWN	N	N	Y	Y	Y	0.68	0
TBIG003440	XLOC_003440	-	-	1.04	0	#NAME?	0.00195	0.251207	yes	DOWN	N	N	Y	Y	Y	1.07	0
TBIG003657	XLOC_003657	-	-	3.38	0	#NAME?	0.00195	0.251207	yes	DOWN	N	N	Y	Y	Y	3.48	0
TBIG003748	XLOC_003748	-	-	1.69	0	#NAME?	0.00195	0.251207	yes	DOWN	N	N	Y	Y	Y	1.74	0
TBIG003785	XLOC_003785	-	-	0.853	0	#NAME?	0.00195	0.251207	yes	DOWN	N	N	Y	Y	Y	0.88	0
TBIG003996	XLOC_003996	-	-	0.753	0	#NAME?	0.00195	0.251207	yes	DOWN	N	N	Y	Y	Y	0.78	0
TBIG013089	XLOC_013089	Pol	Retrovirus-related Pol polyprotein LINE-1 [Source:SWISS;Acc:P11369]	3.45	0.329	-3.39	0.00195	0.251207	yes	DOWN	N	N	Y	Y	Y	3.56	0.32
TBIG015431	ENSRNOG00000009168	LOC100361349	hypothetical protein LOC100361349 [Source:RGD Symbol;Acc:2320316]	27	0	#NAME?	0.00195	0.251207	yes	DOWN	N	N	Y	Y	Y	27.81	0
TBIG016837	XLOC_016837	-	-	0.666	0	#NAME?	0.00195	0.251207	yes	DOWN	N	N	Y	Y	Y	0.69	0
TBIG025972	ENSRNOG00000004459	Sdr9c7	short chain dehydrogenase/reductase family 9C, member 7 [Source:RGD Symbol;Acc:628716]	1.11	0	#NAME?	0.00195	0.251207	yes	DOWN	N	N	Y	Y	Y	1.15	0
TBIG029045	XLOC_029045	-	-	0.677	0	#NAME?	0.00195	0.251207	yes	DOWN	N	N	Y	Y	Y	0.7	0
TBIG026996	ENSRNOG00000009160	LOC683295	similar to keratin complex 2, basic, gene 6a [Source:RGD Symbol;Acc:1589189]	18.6	2.12	-3.13	0.00205	0.262438	yes	DOWN	N	N	Y	Y	Y	19.15	2.06
TBIG010718	ENSRNOG00000010085.L01	Cldn10	claudin 10 [Source:RGD Symbol;Acc:1308027]	60.8	16.1	-1.92	0.0023	0.287262	yes	DOWN	N	N	Y	Y	Y	62.71	15.62
TBIG021270	ENSRNOG00000039494.L01	Aass	aminoadipate-semialdehyde synthase [Source:RGD Symbol;Acc:1310811]	12.6	2.18	-2.53	0.0023	0.287262	yes	DOWN	N	N	Y	Y	Y	13	2.11
TBIG012929	ENSRNOG00000017933.L02	Ccdc3	coiled-coil domain containing 3 [Source:RGD Symbol;Acc:1559473]	15.2	2.86	-2.41	0.0025	0.308479	yes	DOWN	N	N	Y	Y	Y	15.66	2.78
TBIG000470	ENSRNOG00000020380.L01	Lgals7	lectin, galactoside-binding, soluble, 7 [Source:RGD Symbol;Acc:61951]	231	64	-1.85	0.00255	0.310903	yes	DOWN	N	N	Y	Y	Y	238.29	62.06
TBIG013613	ENSRNOG00000016632.L01	Dsg3	desmoglein 3 [Source:RGD Symbol;Acc:1592103]	26.9	7.28	-1.88	0.0027	0.319677	yes	DOWN	N	N	Y	Y	Y	27.72	7.07
TBIG016376	ENSRNOG00000009345	Ugt8	UDP glycosyltransferase 8 [Source:RGD Symbol;Acc:3938]	10	2.08	-2.27	0.00285	0.329811	yes	DOWN	N	N	Y	Y	Y	10.33	2.02
TBIG008333	ENSRNOG00000002414.L01	Tfcp2l1	transcription factor CP2-like 1 [Source:RGD Symbol;Acc:1305456]	7.41	2.11	-1.82	0.00295	0.335694	yes	DOWN	N	N	Y	Y	Y	7.64	2.04
TBIG015040	ENSRNOG00000017547.L01	Ccl28	chemokine (C-C motif) ligand 28 [Source:RGD Symbol;Acc:619937]	28.9	6.38	-2.18	0.00295	0.335694	yes	DOWN	N	N	Y	Y	Y	29.81	6.19
TBIG000059	ENSRNOG00000013304	Arg1	arginase 1 [Source:RGD Symbol;Acc:2150]	76.8	22.5	-1.77	0.0032	0.358173	yes	DOWN	N	N	Y	Y	Y	79.21	21.8
TBIG028291	ENSRNOG00000014343.L01	Anln	anillin, actin binding protein [Source:RGD Symbol;Acc:1561367]	7.09	1.36	-2.39	0.00325	0.361792	yes	DOWN	N	N	Y	Y	Y	7.32	1.32
TBIG027942	ENSRNOG00000025332.L01	Cd109	CD109 molecule [Source:RGD Symbol;Acc:1311287]	7.55	1.47	-2.36	0.00335	0.368914	yes	DOWN	N	N	Y	Y	Y	7.78	1.43
TBIG004795	ENSRNOG00000008422.L01	Lpo	lactoperoxidase [Source:RGD Symbol;Acc:1310051]	203	38.9	-2.39	0.00355	0.378722	yes	DOWN	N	N	Y	Y	Y	209.67	37.72
TBIG025861	ENSRNOG00000006367.L01	Slc5a8	solute carrier family 5 (sodium/monocarboxylate cotransporter), member 8 [Source:RGD Symbol;Acc:1564146]	5.63	1.2	-2.23	0.0036	0.382066	yes	DOWN	N	N	Y	Y	Y	5.81	1.16
TBIG008321	ENSRNOG00000002640.L01	Serpinb5	serpin peptidase inhibitor, clade B (ovalbumin), member 5 [Source:RGD Symbol;Acc:69342]	33.7	10.4	-1.7	0.00365	0.385376	yes	DOWN	N	N	Y	Y	Y	34.79	10.11
TBIG004367	ENSRNOG00000003781.L01	Atp10b	ATPase, class V, type 10B [Source:RGD Symbol;Acc:1565126]	5.09	0.737	-2.79	0.0037	0.388652	yes	DOWN	N	N	Y	Y	Y	5.24	0.72
TBIG030779	ENSRNOG00000006642.L01	Yipf6	Yip1 domain family, member 6 [Source:RGD Symbol;Acc:1566154]	30.5	9.21	-1.73	0.00385	0.400302	yes	DOWN	N	N	Y	Y	Y	31.45	8.95
TBIG015589	ENSRNOG00000015627.L01	Slc35a3	solute carrier family 35 (UDP-N-acetylglucosamine (UDP-GlcNAc) transporter), member A3 [Source:RGD Symbol;Acc:1308615]	36.1	9.13	-1.98	0.00425	0.433098	yes	DOWN	N	N	Y	Y	Y	37.16	8.87
TBIG017648	ENSRNOG00000000800.L01	Man1a1	mannosidase, alpha, class 1A, member 1 [Source:RGD Symbol;Acc:1310891]	29.9	8.86	-1.76	0.00465	0.464614	yes	DOWN	N	N	Y	Y	Y	30.87	8.6
TBIG008627	ENSRNOG00000003468.L01	Capn8	calpain 8 [Source:RGD Symbol;Acc:620085]	7.13	1.02	-2.8	0.00475	0.467761	yes	DOWN	N	N	Y	Y	Y	7.35	0.99
TBIG003494	XLOC_003494	Krt6a	Keratin, type II cytoskeletal 6A [Source:SWISS;Acc:Q4FZU2]	62.7	5.46	-3.52	0.00485	0.47306	yes	DOWN	N	N	Y	Y	Y	64.63	5.3
TBIG009849	ENSRNOG00000002227.L01	Kit	v-kit Hardy-Zuckerman 4 feline sarcoma viral oncogene homolog [Source:RGD Symbol;Acc:620568]	16.1	5.24	-1.62	0.005	0.480822	yes	DOWN	N	N	Y	Y	Y	16.63	5.09
TBIG017520	ENSRNOG00000001162	Tff2	trefoil factor 2 [Source:RGD Symbol;Acc:620709]	889	206	-2.11	0.0053	0.489616	yes	DOWN	N	N	Y	Y	Y	916.91	200.22
TBIG016333	ENSRNOG00000020272.L01	5330417C22Rik	RIKEN cDNA 5330417C22 gene [Source:MGI Symbol;Acc:MGI:1923930]	54.7	12.6	-2.12	0.00535	0.489616	yes	DOWN	N	N	Y	Y	Y	56.38	12.24
TBIG007765	ENSRNOG00000025164	Bhlha15	basic helix-loop-helix family, member a15 [Source:RGD Symbol;Acc:3091]	27.9	8.58	-1.7	0.0054	0.489616	yes	DOWN	N	N	Y	Y	Y	28.76	8.32
TBIG009439	ENSRNOG00000029964.L01	Tmprss11g	transmembrane protease, serine 11G [Source:RGD Symbol;Acc:1306446]	26.5	8.54	-1.64	0.0054	0.489616	yes	DOWN	N	N	Y	Y	Y	27.34	8.29
TBIG013601	ENSRNOG00000039969.L01	Dsc2	desmocollin 2 [Source:RGD Symbol;Acc:1309426]	45.1	13.8	-1.71	0.00555	0.492295	yes	DOWN	N	N	Y	Y	Y	46.48	13.42
TBIG002339	ENSRNOG00000011160.L01	Sv2b	synaptic vesicle glycoprotein 2b [Source:RGD Symbol;Acc:619716]	3.42	0.346	-3.3	0.00595	0.507808	yes	DOWN	N	N	Y	Y	Y	3.52	0.34
TBIG028478	ENSRNOG00000027847.L01	Nxpe2	neurexophilin and PC-esterase domain family, member 2 [Source:RGD Symbol;Acc:2323193]	30.4	3.88	-2.97	0.00595	0.507808	yes	DOWN	N	N	Y	Y	Y	31.29	3.77
TBIG015270	ENSRNOG00000009514.L01	Mme	membrane metallo-endopeptidase [Source:RGD Symbol;Acc:3098]	22	5.5	-2	0.006	0.50995	yes	DOWN	N	N	Y	Y	Y	22.66	5.34
TBIG008326	ENSRNOG00000002460.L01	Serpinb2	serpin peptidase inhibitor, clade B (ovalbumin), member 2 [Source:RGD Symbol;Acc:621823]	33.5	10.7	-1.65	0.0063	0.528594	yes	DOWN	N	N	Y	Y	Y	34.51	10.35
TBIG030054	ENSRNOG00000013213	Epha4	Eph receptor A4 [Source:RGD Symbol;Acc:1560587]	6.3	1.8	-1.81	0.0064	0.528594	yes	DOWN	N	N	Y	Y	Y	6.5	1.75
TBIG024712	ENSRNOG00000037436.L01	Macc1	metastasis associated in colon cancer 1 [Source:RGD Symbol;Acc:1309838]	4.61	0.999	-2.21	0.00645	0.530436	yes	DOWN	N	N	Y	Y	Y	4.76	0.97
TBIG026986	ENSRNOG00000025994.L01	Krt80	keratin 80 [Source:RGD Symbol;Acc:1359177]	42.7	13.4	-1.67	0.0065	0.530436	yes	DOWN	N	N	Y	Y	Y	44.07	13.02
TBIG007820	XLOC_007820	Cyp3a9	Cytochrome P450 3A9 [Source:SWISS;Acc:P51538]	25.1	7.25	-1.79	0.00665	0.538387	yes	DOWN	N	N	Y	Y	Y	25.87	7.04
TBIG015663	ENSRNOG00000032959	Adh7	alcohol dehydrogenase 7 (class IV), mu or sigma polypeptide [Source:RGD Symbol;Acc:621638]	96.3	29.8	-1.69	0.0069	0.552081	yes	DOWN	N	N	Y	Y	Y	99.28	28.95
TBIG020452	ENSRNOG00000005210.L01	Gnai1	guanine nucleotide binding protein (G protein), alpha inhibiting activity polypeptide 1 [Source:RGD Symbol;Acc:2713]	11.9	3.19	-1.9	0.00695	0.553918	yes	DOWN	N	N	Y	Y	Y	12.25	3.1
TBIG020498	ENSRNOG00000007804.L01	C1galt1	core 1 synthase, glycoprotein-N-acetylgalactosamine 3-beta-galactosyltransferase, 1 [Source:RGD Symbol;Acc:621105]	46.3	14.2	-1.7	0.00715	0.561124	yes	DOWN	N	N	Y	Y	Y	47.74	13.81
TBIG003493	XLOC_003493	Krt6a	Keratin, type II cytoskeletal 6A [Source:SWISS;Acc:Q4FZU2]	294	39.8	-2.89	0.00745	0.578024	yes	DOWN	N	N	Y	Y	Y	303.56	38.63
TBIG018934	ENSRNOG00000018574.L01	Qsox2	quiescin Q6 sulfhydryl oxidase 2 [Source:RGD Symbol;Acc:1584720]	8.18	2.25	-1.86	0.0075	0.579708	yes	DOWN	N	N	Y	Y	Y	8.43	2.18
TBIG000718	ENSRNOG00000013057.L01	Prc1	protein regulator of cytokinesis 1 [Source:RGD Symbol;Acc:1311754]	8.99	2.02	-2.15	0.0076	0.583037	yes	DOWN	N	N	Y	Y	Y	9.27	1.96
TBIG027007	ENSRNOG00000024909	Krt78	keratin 78 [Source:RGD Symbol;Acc:1591341]	6.42	1.14	-2.49	0.00785	0.589439	yes	DOWN	N	N	Y	Y	Y	6.63	1.11
TBIG024384	ENSRNOG00000023272	Rrm2	ribonucleotide reductase M2 [Source:RGD Symbol;Acc:1598310]	9.89	0.71	-3.8	0.008	0.589439	yes	DOWN	N	N	Y	Y	Y	10.2	0.69
TBIG009910	ENSRNOG00000004626.L01	Slc34a2	solute carrier family 34 (type II sodium/phosphate contransporter), member 2 [Source:RGD Symbol;Acc:620889]	5.97	1.32	-2.18	0.00825	0.601369	yes	DOWN	N	N	Y	Y	Y	6.16	1.28
TBIG014397	ENSRNOG00000016695.L01	Mmp2	matrix metallopeptidase 2 [Source:RGD Symbol;Acc:621316]	84	26.9	-1.65	0.00845	0.604075	yes	DOWN	N	N	Y	Y	Y	86.67	26.07
TBIG010546	ENSRNOG00000020382.L01	Ltb4r2	leukotriene B4 receptor 2 [Source:RGD Symbol;Acc:621029]	4.54	0.663	-2.78	0.0085	0.604075	yes	DOWN	N	N	Y	Y	Y	4.69	0.64
TBIG002381	ENSRNOG00000019297.L01	Homer2	homer homolog 2 (Drosophila) [Source:RGD Symbol;Acc:620705]	20.5	4.55	-2.17	0.0086	0.604075	yes	DOWN	N	N	Y	Y	Y	21.18	4.41
TBIG026515	ENSRNOG00000038916.L01	Dram1	DNA-damage regulated autophagy modulator 1 [Source:RGD Symbol;Acc:1598133]	12.1	3.28	-1.88	0.00875	0.604075	yes	DOWN	N	N	Y	Y	Y	12.44	3.18
TBIG001612	ENSRNOG00000016926.L01	Plekhs1	pleckstrin homology domain containing, family S member 1 [Source:RGD Symbol;Acc:1559884]	7.35	2.23	-1.72	0.0089	0.604075	yes	DOWN	N	N	Y	Y	Y	7.58	2.16
TBIG014914	ENSRNOG00000027089.L01	Ell2	elongation factor RNA polymerase II 2 [Source:RGD Symbol;Acc:1309296]	27.9	8.21	-1.76	0.00895	0.604075	yes	DOWN	N	N	Y	Y	Y	28.76	7.97
TBIG017960	ENSRNOG00000039906.L01	Gbgt1	globoside alpha-1,3-N-acetylgalactosaminyltransferase 1 [Source:RGD Symbol;Acc:628609]	18.8	4.96	-1.92	0.009	0.604075	yes	DOWN	N	N	Y	Y	Y	19.37	4.82
TBIG015916	ENSRNOG00000009629.L01	Car2	carbonic anhydrase 2 [Source:RGD Symbol;Acc:2240]	43.3	13.1	-1.73	0.0091	0.604075	yes	DOWN	N	N	Y	Y	Y	44.68	12.68
TBIG018208	ENSRNOG00000001514	Cdca7	cell division cycle associated 7 [Source:RGD Symbol;Acc:1309363]	22.4	7.28	-1.62	0.00975	0.604075	yes	DOWN	N	N	Y	Y	Y	23.09	7.07
TBIG015646	ENSRNOG00000009339.L01	Cenpe	centromere protein E [Source:RGD Symbol;Acc:1307115]	1.35	0.2	-2.75	0.00985	0.604075	yes	DOWN	N	N	Y	Y	Y	1.39	0.19
TBIG019580	ENSRNOG00000021274.L01	Fermt1	fermitin family member 1 [Source:RGD Symbol;Acc:1306816]	9.57	3.16	-1.6	0.00995	0.604075	yes	DOWN	N	N	Y	Y	Y	9.87	3.07
TBIG015597	XLOC_015597	Dpyd	Dihydropyrimidine dehydrogenase [NADP(+)] [Source:SWISS;Acc:O89000]	17.6	4.93	-1.84	0.01	0.604075	yes	DOWN	N	N	Y	Y	Y	18.19	4.79
TBIG022375	ENSRNOG00000007030.L01	Epha7	Eph receptor A7 [Source:RGD Symbol;Acc:70957]	8.51	2.7	-1.66	0.0102	0.604075	yes	DOWN	N	N	N	Y	Y	8.78	2.62
TBIG009463	XLOC_009463	-	-	14.7	3.97	-1.89	0.01035	0.604075	yes	DOWN	N	N	N	Y	Y	15.2	3.86
TBIG015616	ENSRNOG00000014872.L01	Sec24d	SEC24 family member D [Source:RGD Symbol;Acc:1311720]	21.6	7.11	-1.61	0.01055	0.604075	yes	DOWN	N	N	N	Y	Y	22.3	6.9
TBIG001493	ENSRNOG00000018929.L01	Kif20b	kinesin family member 20B [Source:RGD Symbol;Acc:1308497]	1.66	0.357	-2.22	0.01085	0.604075	yes	DOWN	N	N	N	Y	Y	1.71	0.35
TBIG014137	ENSRNOG00000008450	LOC100359539	ribonucleotide reductase M2 polypeptide [Source:RGD Symbol;Acc:2323655]	5.66	1.2	-2.24	0.01115	0.604075	yes	DOWN	N	N	N	Y	Y	5.84	1.16
TBIG003661	XLOC_003661	-	-	0.748	0	#NAME?	0.0114	0.604075	yes	DOWN	N	N	N	Y	Y	0.77	0
TBIG004168	XLOC_004168	-	-	1.37	0	#NAME?	0.0114	0.604075	yes	DOWN	N	N	N	Y	Y	1.41	0
TBIG013087	XLOC_013087	-	-	5.75	0	#NAME?	0.0114	0.604075	yes	DOWN	N	N	N	Y	Y	5.93	0
TBIG013201	XLOC_013201	-	-	0.945	0	#NAME?	0.0114	0.604075	yes	DOWN	N	N	N	Y	Y	0.97	0
TBIG014890	XLOC_014890	-	-	0.664	0	#NAME?	0.0114	0.604075	yes	DOWN	N	N	N	Y	Y	0.68	0
TBIG027045	XLOC_027045	-	-	0.7	0	#NAME?	0.0114	0.604075	yes	DOWN	N	N	N	Y	Y	0.72	0
TBIG030370	XLOC_030370	-	-	0.601	0	#NAME?	0.0114	0.604075	yes	DOWN	N	N	N	Y	Y	0.62	0
TBIG018457	ENSRNOG00000009334	Knstrn	kinetochore-localized astrin/SPAG5 binding protein [Source:RGD Symbol;Acc:1303240]	5.15	0.473	-3.45	0.01155	0.604075	yes	DOWN	N	N	N	Y	Y	5.32	0.46
TBIG011778	ENSRNOG00000043342	LOC290595	hypothetical gene supported by AF152002 [Source:RGD Symbol;Acc:1566160]	54.9	16.9	-1.7	0.01245	0.604075	yes	DOWN	N	N	N	Y	Y	56.57	16.42
TBIG019597	XLOC_019597	-	-	2.48	0.588	-2.08	0.01245	0.604075	yes	DOWN	N	N	N	Y	Y	2.55	0.57
TBIG025985	XLOC_025985	-	-	3.95	1.09	-1.86	0.01255	0.604075	yes	DOWN	N	N	N	Y	Y	4.07	1.06
TBIG025197	ENSRNOG00000050912.L01	AABR06046451.5	Uncharacterized protein [Source:UniProtKB/TrEMBL;Acc:D3ZE00]	2.4	0	#NAME?	0.0126	0.604075	yes	DOWN	N	N	N	Y	Y	2.47	0
TBIG024407	ENSRNOG00000006867.L01	Etv1	ets variant 1 [Source:RGD Symbol;Acc:1312007]	45.2	14.1	-1.69	0.01285	0.604075	yes	DOWN	N	N	N	Y	Y	46.62	13.66
TBIG003994	XLOC_003994	-	-	89.7	9.2	-3.29	0.01315	0.604075	yes	DOWN	N	N	N	Y	Y	92.52	8.93
TBIG029920	ENSRNOG00000018276.L01	Mgat4a	mannosyl (alpha-1,3-)-glycoprotein beta-1,4-N-acetylglucosaminyltransferase, isozyme A [Source:RGD Symbol;Acc:1305650]	14.7	5.36	-1.46	0.01315	0.604075	yes	DOWN	N	N	N	Y	Y	15.2	5.21
TBIG017332	ENSRNOG00000000321	Cd24	CD24 molecule [Source:RGD Symbol;Acc:2298]	264	69.1	-1.93	0.0132	0.604075	yes	DOWN	N	N	N	Y	Y	272.06	67.08
TBIG016424	ENSRNOG00000036877.L01	Clca4l	chloride channel calcium activated 4-like [Source:RGD Symbol;Acc:1591945]	5.65	0.65	-3.12	0.01335	0.604075	yes	DOWN	N	N	N	Y	Y	5.83	0.63
TBIG002055	ENSRNOG00000020578.L01	Ceacam1	carcinoembryonic antigen-related cell adhesion molecule 1 (biliary glycoprotein) [Source:RGD Symbol;Acc:67396]	20.8	7.36	-1.5	0.0134	0.604075	yes	DOWN	N	N	N	Y	Y	21.46	7.15
TBIG008753	ENSRNOG00000003120.L01	Prelp	proline/arginine-rich end leucine-rich repeat protein [Source:RGD Symbol;Acc:620226]	28.8	9.68	-1.57	0.01355	0.604075	yes	DOWN	N	N	N	Y	Y	29.75	9.4
TBIG003387	XLOC_003387	-	-	1.48	0	#NAME?	0.0136	0.604075	yes	DOWN	N	N	N	Y	Y	1.53	0
TBIG003546	XLOC_003546	-	-	1.23	0	#NAME?	0.0136	0.604075	yes	DOWN	N	N	N	Y	Y	1.27	0
TBIG003753	XLOC_003753	-	-	4.33	0	#NAME?	0.0136	0.604075	yes	DOWN	N	N	N	Y	Y	4.47	0
TBIG002321	ENSRNOG00000013028.L01	Aldh1a3	aldehyde dehydrogenase 1 family, member A3 [Source:RGD Symbol;Acc:628662]	13.6	4.58	-1.57	0.0136	0.604075	yes	DOWN	N	N	N	Y	Y	14.02	4.44
TBIG003947	XLOC_003947	TR22_MOUSE	Putative transposase element L1Md-A101/L1Md-A102/L1Md-A2 [Source:SWISS;Acc:P11260]	6.68	0	#NAME?	0.0136	0.604075	yes	DOWN	N	N	N	Y	Y	6.89	0
TBIG007333	XLOC_007333	-	-	0.942	0	#NAME?	0.0136	0.604075	yes	DOWN	N	N	N	Y	Y	0.97	0
TBIG008669	XLOC_008669	-	-	37.8	0	#NAME?	0.0136	0.604075	yes	DOWN	N	N	N	Y	Y	38.93	0
TBIG011357	XLOC_011357	-	-	0.788	0	#NAME?	0.0136	0.604075	yes	DOWN	N	N	N	Y	Y	0.81	0
TBIG014683	XLOC_014683	-	-	0.995	0	#NAME?	0.0136	0.604075	yes	DOWN	N	N	N	Y	Y	1.03	0
TBIG015710	ENSRNOG00000021410	Negr1	neuronal growth regulator 1 [Source:RGD Symbol;Acc:708416]	2.29	0	#NAME?	0.0136	0.604075	yes	DOWN	N	N	N	Y	Y	2.37	0
TBIG028695	XLOC_028695	Ica	Inhibitor of carbonic anhydrase [Source:SWISS;Acc:Q9DBD0]	34.7	12.3	-1.5	0.01365	0.604075	yes	DOWN	N	N	N	Y	Y	35.82	11.91
TBIG013091	XLOC_013091	-	-	3.1	0.78	-1.99	0.0137	0.604075	yes	DOWN	N	N	N	Y	Y	3.2	0.76
TBIG000741	ENSRNOG00000017140.L01	Zfp185	zinc finger protein 185 [Source:RGD Symbol;Acc:1586351]	14.9	5.52	-1.44	0.01385	0.604075	yes	DOWN	N	N	N	Y	Y	15.41	5.36
TBIG008881	ENSRNOG00000003038.L01	Sft2d2	SFT2 domain containing 2 [Source:RGD Symbol;Acc:1310623]	49.3	15.1	-1.71	0.0139	0.604075	yes	DOWN	N	N	N	Y	Y	50.86	14.66
TBIG012974	ENSRNOG00000002609.L01	Ero1lb	ERO1-like beta (S. cerevisiae) [Source:RGD Symbol;Acc:1563548]	15.9	3.67	-2.11	0.01435	0.604075	yes	DOWN	N	N	N	Y	Y	16.35	3.56
TBIG007390	ENSRNOG00000000924.L01	Slc7a1	solute carrier family 7 (cationic amino acid transporter, y+ system), member 1 [Source:RGD Symbol;Acc:3716]	8.82	3.1	-1.51	0.0145	0.604075	yes	DOWN	N	N	N	Y	Y	9.09	3.01
TBIG015958	ENSRNOG00000024365.L01	Ect2	epithelial cell transforming 2 [Source:RGD Symbol;Acc:1308524]	4.03	0.566	-2.83	0.0147	0.604075	yes	DOWN	N	N	N	Y	Y	4.15	0.55
TBIG017210	ENSRNOG00000046428.L01	Lrrc75b	leucine rich repeat containing 75B [Source:RGD Symbol;Acc:2318441]	8.56	2.6	-1.72	0.0148	0.604075	yes	DOWN	N	N	N	Y	Y	8.83	2.52
TBIG008498	XLOC_008498	-	-	21.1	0	#NAME?	0.01485	0.604075	yes	DOWN	N	N	N	Y	Y	21.71	0
TBIG010226	XLOC_010226	-	-	0.702	0	#NAME?	0.01485	0.604075	yes	DOWN	N	N	N	Y	Y	0.72	0
TBIG011287	XLOC_011287	-	-	0.711	0	#NAME?	0.01485	0.604075	yes	DOWN	N	N	N	Y	Y	0.73	0
TBIG012226	XLOC_012226	-	-	0.739	0	#NAME?	0.01485	0.604075	yes	DOWN	N	N	N	Y	Y	0.76	0
TBIG012227	XLOC_012227	-	-	0.602	0	#NAME?	0.01485	0.604075	yes	DOWN	N	N	N	Y	Y	0.62	0
TBIG013853	XLOC_013853	-	-	0.972	0	#NAME?	0.01485	0.604075	yes	DOWN	N	N	N	Y	Y	1	0
TBIG014187	ENSRNOG00000013808.L01	Ces2g	carboxylesterase 2G [Source:RGD Symbol;Acc:1308358]	16.3	5.28	-1.63	0.01485	0.604075	yes	DOWN	N	N	N	Y	Y	16.85	5.13
TBIG014814	XLOC_014814	-	-	0.729	0	#NAME?	0.01485	0.604075	yes	DOWN	N	N	N	Y	Y	0.75	0
TBIG027035	XLOC_027035	pol	Pol polyprotein [Source:SWISS;Acc:P10272]	1.07	0	#NAME?	0.01485	0.604075	yes	DOWN	N	N	N	Y	Y	1.1	0
TBIG027429	XLOC_027429	-	-	0.862	0	#NAME?	0.01485	0.604075	yes	DOWN	N	N	N	Y	Y	0.89	0
TBIG029170	XLOC_029170	-	-	0.622	0	#NAME?	0.01485	0.604075	yes	DOWN	N	N	N	Y	Y	0.64	0
TBIG011078	ENSRNOG00000008986.L01	Diaph3	diaphanous-related formin 3 [Source:RGD Symbol;Acc:1593287]	2.85	0.643	-2.15	0.01505	0.604075	yes	DOWN	N	N	N	Y	Y	2.94	0.62
TBIG018454	ENSRNOG00000007906.L01	Bub1b	BUB1 mitotic checkpoint serine/threonine kinase B [Source:RGD Symbol;Acc:619791]	2.95	0.459	-2.69	0.01525	0.604075	yes	DOWN	N	N	N	Y	Y	3.05	0.45
TBIG027929	ENSRNOG00000010917.L01	Bmp5	bone morphogenetic protein 5 [Source:RGD Symbol;Acc:1305979]	4.8	1.19	-2.01	0.0155	0.604075	yes	DOWN	N	N	N	Y	Y	4.95	1.16
TBIG011482	ENSRNOG00000017156.L01	Ankle1	ankyrin repeat and LEM domain containing 1 [Source:RGD Symbol;Acc:1308184]	3.12	0.642	-2.28	0.01565	0.604075	yes	DOWN	N	N	N	Y	Y	3.22	0.62
TBIG023580	ENSRNOG00000029427.L01	Grhl3	grainyhead-like 3 (Drosophila) [Source:RGD Symbol;Acc:1308320]	11.2	3.59	-1.64	0.0159	0.604075	yes	DOWN	N	N	N	Y	Y	11.53	3.48
TBIG006884	ENSRNOG00000030285.L01	Epha3	Eph receptor A3 [Source:RGD Symbol;Acc:68389]	2.78	0.747	-1.9	0.0162	0.604075	yes	DOWN	N	N	N	Y	Y	2.87	0.73
TBIG025272	XLOC_025272	-	-	21.3	6.46	-1.72	0.01625	0.604075	yes	DOWN	N	N	N	Y	Y	21.98	6.28
TBIG009500	ENSRNOG00000002192.L01	Rell1	RELT-like 1 [Source:RGD Symbol;Acc:1307468]	19.4	6.72	-1.53	0.0163	0.604075	yes	DOWN	N	N	N	Y	Y	19.98	6.52
TBIG028530	ENSRNOG00000014080.L01	Kif23	kinesin family member 23 [Source:RGD Symbol;Acc:1308596]	11.8	4.21	-1.49	0.01645	0.604075	yes	DOWN	N	N	N	Y	Y	12.21	4.09
TBIG003506	XLOC_003506	-	-	0.742	0	#NAME?	0.01665	0.604075	yes	DOWN	N	N	N	Y	Y	0.76	0
TBIG003625	XLOC_003625	-	-	0.899	0	#NAME?	0.01665	0.604075	yes	DOWN	N	N	N	Y	Y	0.93	0
TBIG006454	XLOC_006454	-	-	0.805	0	#NAME?	0.01665	0.604075	yes	DOWN	N	N	N	Y	Y	0.83	0
TBIG009074	XLOC_009074	gag	Glycosylated Gag polyprotein [Source:SWISS;Acc:Q8UN02]	1.93	0	#NAME?	0.01665	0.604075	yes	DOWN	N	N	N	Y	Y	1.99	0
TBIG009252	XLOC_009252	-	-	0.708	0	#NAME?	0.01665	0.604075	yes	DOWN	N	N	N	Y	Y	0.73	0
TBIG013127	XLOC_013127	-	-	0.973	0	#NAME?	0.01665	0.604075	yes	DOWN	N	N	N	Y	Y	1	0
TBIG013925	XLOC_013925	-	-	0.772	0	#NAME?	0.01665	0.604075	yes	DOWN	N	N	N	Y	Y	0.8	0
TBIG021349	ENSRNOG00000013203	LOC312273	Trypsin V-A [Source:RGD Symbol;Acc:1563848]	0.845	0	#NAME?	0.01665	0.604075	yes	DOWN	N	N	N	Y	Y	0.87	0
TBIG029004	XLOC_029004	-	-	3.68	0	#NAME?	0.01665	0.604075	yes	DOWN	N	N	N	Y	Y	3.79	0
TBIG000385	ENSRNOG00000019999.L01	Lypd3	Ly6/Plaur domain containing 3 [Source:RGD Symbol;Acc:69053]	79.3	29.8	-1.41	0.01675	0.604075	yes	DOWN	N	N	N	Y	Y	81.78	28.93
TBIG017299	ENSRNOG00000000543.L01	Frk	fyn-related Src family tyrosine kinase [Source:RGD Symbol;Acc:621423]	8.67	3.05	-1.51	0.0168	0.604075	yes	DOWN	N	N	N	Y	Y	8.93	2.96
TBIG001437	ENSRNOG00000050534.L01	Gcnt1	glucosaminyl (N-acetyl) transferase 1, core 2 [Source:RGD Symbol;Acc:621370]	9.46	3.34	-1.5	0.0169	0.604075	yes	DOWN	N	N	N	Y	Y	9.76	3.24
TBIG012897	ENSRNOG00000049410.L01	Chrm3	cholinergic receptor, muscarinic 3 [Source:RGD Symbol;Acc:2343]	7.8	1.83	-2.09	0.017	0.604075	yes	DOWN	N	N	N	Y	Y	8.04	1.77
TBIG020676	ENSRNOG00000008816.L01	Gpnmb	glycoprotein (transmembrane) nmb [Source:RGD Symbol;Acc:71008]	27	10	-1.43	0.0171	0.604075	yes	DOWN	N	N	N	Y	Y	27.84	9.74
TBIG029813	ENSRNOG00000014492	Pgc	progastricsin (pepsinogen C) [Source:RGD Symbol;Acc:3943]	9.45	1.75	-2.43	0.01745	0.604786	yes	DOWN	N	N	N	Y	Y	9.74	1.7
TBIG018381	ENSRNOG00000008282.L01	Elf5	E74-like factor 5 [Source:RGD Symbol;Acc:1305859]	38.8	11.9	-1.71	0.0176	0.608954	yes	DOWN	N	N	N	Y	Y	40.02	11.53
TBIG018451	XLOC_018451	Thbs1	Thrombospondin-1 [Source:SWISS;Acc:P35441]	9.73	1.21	-3.01	0.01765	0.609654	yes	DOWN	N	N	N	Y	Y	10.03	1.17
TBIG031357	ENSRNOG00000018187	LOC100909901	rac GTPase-activating protein 1-like [Source:RGD Symbol;Acc:6501444]	2.92	0.354	-3.05	0.01775	0.612076	yes	DOWN	N	N	N	Y	Y	3.01	0.34
TBIG018475	ENSRNOG00000004921.L01	Nusap1	nucleolar and spindle associated protein 1 [Source:RGD Symbol;Acc:1305764]	4.84	1.13	-2.1	0.0179	0.61312	yes	DOWN	N	N	N	Y	Y	5	1.1
TBIG014288	ENSRNOG00000017431.L01	RGD1304884	similar to RIKEN cDNA 6430548M08 [Source:RGD Symbol;Acc:1304884]	32.5	11.3	-1.53	0.01795	0.613806	yes	DOWN	N	N	N	Y	Y	33.53	10.95
TBIG021504	ENSRNOG00000029401	Actg2	actin, gamma 2, smooth muscle, enteric [Source:RGD Symbol;Acc:2027]	14	3.29	-2.09	0.01805	0.61415	yes	DOWN	N	N	N	Y	Y	14.42	3.19
TBIG028702	ENSRNOG00000011820.L01	Acpp	acid phosphatase, prostate [Source:RGD Symbol;Acc:2023]	26.6	9.82	-1.44	0.01845	0.623616	yes	DOWN	N	N	N	Y	Y	27.39	9.53
TBIG020733	ENSRNOG00000024986.L01	Mmrn1	multimerin 1 [Source:RGD Symbol;Acc:1587248]	5.26	1.57	-1.75	0.0185	0.624276	yes	DOWN	N	N	N	Y	Y	5.42	1.52
TBIG015237	ENSRNOG00000012660.L01	Postn	periostin, osteoblast specific factor [Source:RGD Symbol;Acc:1305285]	23.5	9.01	-1.38	0.01855	0.624934	yes	DOWN	N	N	N	Y	Y	24.21	8.75
TBIG027891	ENSRNOG00000017766.L01	Car12	carbonic anyhydrase 12 [Source:RGD Symbol;Acc:1306612]	30.8	11.7	-1.4	0.01865	0.627271	yes	DOWN	N	N	N	Y	Y	31.73	11.33
TBIG017298	ENSRNOG00000000545.L01	Col10a1	collagen, type X, alpha 1 [Source:RGD Symbol;Acc:2371]	14.7	3.03	-2.28	0.01915	0.630746	yes	DOWN	N	N	N	Y	Y	15.18	2.94
TBIG012544	ENSRNOG00000018113	Anlnl1	anillin, actin binding protein-like 1 [Source:RGD Symbol;Acc:1566097]	2.54	0.319	-3	0.0192	0.630746	yes	DOWN	N	N	N	Y	Y	2.62	0.31
TBIG003992	XLOC_003992	-	-	7.71	1.43	-2.43	0.0193	0.630746	yes	DOWN	N	N	N	Y	Y	7.95	1.39
TBIG004797	XLOC_004797	-	-	6.1	0	#NAME?	0.0194	0.630746	yes	DOWN	N	N	N	Y	Y	6.29	0
TBIG009049	XLOC_009049	-	-	5.28	0	#NAME?	0.0194	0.630746	yes	DOWN	N	N	N	Y	Y	5.45	0
TBIG012912	ENSRNOG00000028576.L01	Calml5	calmodulin-like 5 [Source:RGD Symbol;Acc:1310047]	121	32.6	-1.9	0.0194	0.630746	yes	DOWN	N	N	N	Y	Y	125.02	31.61
TBIG014736	XLOC_014736	-	-	1.31	0	#NAME?	0.0194	0.630746	yes	DOWN	N	N	N	Y	Y	1.35	0
TBIG020483	ENSRNOG00000047453.L01	Casd1	CAS1 domain containing 1 [Source:MGI Symbol;Acc:MGI:2384865]	15.8	6.14	-1.37	0.0194	0.630746	yes	DOWN	N	N	N	Y	Y	16.32	5.96
TBIG021956	XLOC_021956	-	-	0.682	0	#NAME?	0.0194	0.630746	yes	DOWN	N	N	N	Y	Y	0.7	0
TBIG029193	XLOC_029193	-	-	0.819	0	#NAME?	0.0194	0.630746	yes	DOWN	N	N	N	Y	Y	0.85	0
TBIG030211	XLOC_030211	-	-	13.1	0	#NAME?	0.0194	0.630746	yes	DOWN	N	N	N	Y	Y	13.54	0
TBIG030292	XLOC_030292	-	-	0.644	0	#NAME?	0.0194	0.630746	yes	DOWN	N	N	N	Y	Y	0.66	0
TBIG022521	ENSRNOG00000024190.L01	LOC683719	similar to RAS and EF hand domain containing [Source:RGD Symbol;Acc:1583373]	11.7	4.53	-1.37	0.0195	0.632993	yes	DOWN	N	N	N	Y	Y	12.08	4.4
TBIG001122	ENSRNOG00000020560.L01	Dmbt1	deleted in malignant brain tumors 1 [Source:RGD Symbol;Acc:61984]	1830	178	-3.36	0.01955	0.633612	yes	DOWN	N	N	N	Y	Y	1882.38	172.81
TBIG020847	ENSRNOG00000018507.L01	Gfpt1	glutamine fructose-6-phosphate transaminase 1 [Source:RGD Symbol;Acc:1549703]	70.4	23.4	-1.59	0.01965	0.634844	yes	DOWN	N	N	N	Y	Y	72.53	22.74
TBIG024909	ENSRNOG00000004198.L01	Stxbp6	syntaxin binding protein 6 (amisyn) [Source:RGD Symbol;Acc:1306117]	10.7	3.76	-1.5	0.01965	0.634844	yes	DOWN	N	N	N	Y	Y	11	3.65
TBIG006797	ENSRNOG00000001928.L01	Il1rap	interleukin 1 receptor accessory protein [Source:RGD Symbol;Acc:2893]	13.6	4.66	-1.55	0.0198	0.637678	yes	DOWN	N	N	N	Y	Y	14.04	4.52
TBIG027604	ENSRNOG00000027736.L01	Cnn1	calponin 1, basic, smooth muscle [Source:RGD Symbol;Acc:621883]	14	3.84	-1.87	0.0198	0.637678	yes	DOWN	N	N	N	Y	Y	14.46	3.73
TBIG006938	ENSRNOG00000021569.L01	Tiam1	T-cell lymphoma invasion and metastasis 1 [Source:RGD Symbol;Acc:1307455]	9.06	3.57	-1.34	0.0199	0.638494	yes	DOWN	N	N	N	Y	Y	9.34	3.46
TBIG008327	ENSRNOG00000002417.L01	Serpinb10	serpin peptidase inhibitor, clade B (ovalbumin), member 10 [Source:RGD Symbol;Acc:628853]	52.6	20.2	-1.38	0.0201	0.640889	yes	DOWN	N	N	N	Y	Y	54.23	19.65
TBIG016058	ENSRNOG00000010023	Slc33a1	solute carrier family 33 (acetyl-CoA transporter), member 1 [Source:RGD Symbol;Acc:620653]	28	10.6	-1.4	0.02025	0.643071	yes	DOWN	N	N	N	Y	Y	28.83	10.31
TBIG024470	ENSRNOG00000004234	Mgat2	mannosyl (alpha-1,6-)-glycoprotein beta-1,2-N-acetylglucosaminyltransferase [Source:RGD Symbol;Acc:620098]	27.2	10.4	-1.39	0.0203	0.643661	yes	DOWN	N	N	N	Y	Y	28	10.07
TBIG024398	ENSRNOG00000005023.L01	Agr2	anterior gradient 2 [Source:RGD Symbol;Acc:1304606]	460	154	-1.58	0.0205	0.64501	yes	DOWN	N	N	N	Y	Y	474.26	149.13
TBIG018244	ENSRNOG00000006803	Dnajc10	DnaJ (Hsp40) homolog, subfamily C, member 10 [Source:RGD Symbol;Acc:1307813]	78.2	27.3	-1.52	0.0207	0.649308	yes	DOWN	N	N	N	Y	Y	80.66	26.51
TBIG000996	ENSRNOG00000014448.L01	Arntl	aryl hydrocarbon receptor nuclear translocator-like [Source:RGD Symbol;Acc:62003]	22	8.45	-1.38	0.02075	0.649881	yes	DOWN	N	N	N	Y	Y	22.68	8.2
TBIG016346	ENSRNOG00000013912.L01	Slc30a7	solute carrier family 30 (zinc transporter), member 7 [Source:RGD Symbol;Acc:1307873]	20.1	6.51	-1.63	0.02095	0.653149	yes	DOWN	N	N	N	Y	Y	20.74	6.32
TBIG013084	XLOC_013084	-	-	3.67	0.718	-2.35	0.0211	0.654835	yes	DOWN	N	N	N	Y	Y	3.79	0.7
TBIG002687	ENSRNOG00000016343.L01	Dkk3	dickkopf WNT signaling pathway inhibitor 3 [Source:RGD Symbol;Acc:621846]	18.7	7.18	-1.38	0.0212	0.654962	yes	DOWN	N	N	N	Y	Y	19.3	6.97
TBIG026199	ENSRNOG00000014511	Alg10	ALG10, alpha-1,2-glucosyltransferase [Source:RGD Symbol;Acc:708500]	11.5	3.22	-1.84	0.02135	0.656625	yes	DOWN	N	N	N	Y	Y	11.9	3.13
TBIG027789	ENSRNOG00000025115.L01	Exph5	exophilin 5 [Source:RGD Symbol;Acc:1560308]	8.97	3.47	-1.37	0.0215	0.659258	yes	DOWN	N	N	N	Y	Y	9.25	3.37
TBIG008347	ENSRNOG00000003614.L01	Mgat5	mannosyl (alpha-1,6-)-glycoprotein beta-1,6-N-acetyl-glucosaminyltransferase [Source:RGD Symbol;Acc:620100]	9.23	2.83	-1.71	0.02165	0.661876	yes	DOWN	N	N	N	Y	Y	9.52	2.74
TBIG021802	XLOC_021802	EFCAB4B	EF-hand calcium-binding domain-containing protein 4B [Source:SWISS;Acc:Q9BSW2]	20.5	7.92	-1.37	0.0217	0.662416	yes	DOWN	N	N	N	Y	Y	21.1	7.68
TBIG009387	ENSRNOG00000002031.L01	Naa11	N(alpha)-acetyltransferase 11, NatA catalytic subunit [Source:RGD Symbol;Acc:1564723]	2.05	0.243	-3.08	0.02185	0.663576	yes	DOWN	N	N	N	Y	Y	2.11	0.24
TBIG026710	ENSRNOG00000004821.L01	Sntb1	syntrophin, beta 1 [Source:RGD Symbol;Acc:1307728]	16.3	6.35	-1.36	0.02185	0.663576	yes	DOWN	N	N	N	Y	Y	16.86	6.17
TBIG009372	ENSRNOG00000002188.L01	Hpse	heparanase [Source:RGD Symbol;Acc:61969]	22.7	8.07	-1.49	0.0219	0.663576	yes	DOWN	N	N	N	Y	Y	23.42	7.83
TBIG029722	ENSRNOG00000015898.L01	Fer	fer (fps/fes related) tyrosine kinase [Source:RGD Symbol;Acc:1306273]	3.93	1.39	-1.5	0.022	0.663745	yes	DOWN	N	N	N	Y	Y	4.06	1.35
TBIG010613	ENSRNOG00000011316.L01	Fam167a	family with sequence similarity 167, member A [Source:RGD Symbol;Acc:1561302]	11	4.04	-1.44	0.02205	0.663745	yes	DOWN	N	N	N	Y	Y	11.34	3.93
TBIG027226	XLOC_027226	-	-	9.15	2.5	-1.87	0.0221	0.663745	yes	DOWN	N	N	N	Y	Y	9.44	2.43
TBIG004289	ENSRNOG00000047969.L01	Prss21	protease, serine, 21 [Source:RGD Symbol;Acc:727870]	3.29	0.551	-2.58	0.02235	0.668314	yes	DOWN	N	N	N	Y	Y	3.39	0.53
TBIG027749	ENSRNOG00000016397.L01	Tmprss13	transmembrane protease, serine 13 [Source:RGD Symbol;Acc:1310872]	9.66	3.12	-1.63	0.0224	0.668833	yes	DOWN	N	N	N	Y	Y	9.96	3.03
TBIG011812	ENSRNOG00000018764.L01	B3gnt3	UDP-GlcNAc:betaGal beta-1,3-N-acetylglucosaminyltransferase 3 [Source:RGD Symbol;Acc:1305151]	9.02	2.38	-1.92	0.0226	0.672843	yes	DOWN	N	N	N	Y	Y	9.3	2.31
TBIG023888	XLOC_023888	Pol	Retrovirus-related Pol polyprotein LINE-1 [Source:SWISS;Acc:P11369]	3.96	0.534	-2.89	0.0227	0.674839	yes	DOWN	N	N	N	Y	Y	4.08	0.52
TBIG012396	ENSRNOG00000015957	F13a1	coagulation factor XIII, A1 polypeptide [Source:RGD Symbol;Acc:621495]	4.43	1.3	-1.76	0.0229	0.677833	yes	DOWN	N	N	N	Y	Y	4.56	1.26
TBIG013602	XLOC_013602	Garem	GRB2-associated and regulator of MAPK protein [Source:SWISS;Acc:Q3UFT3]	16.3	2.35	-2.8	0.02325	0.684189	yes	DOWN	N	N	N	Y	Y	16.87	2.28
TBIG015359	ENSRNOG00000027894.L01	Iqgap3	IQ motif containing GTPase activating protein 3 [Source:RGD Symbol;Acc:1305951]	2.64	0.634	-2.06	0.02325	0.684189	yes	DOWN	N	N	N	Y	Y	2.72	0.62
TBIG015080	ENSRNOG00000019184.L01	Npr3	natriuretic peptide receptor 3 [Source:RGD Symbol;Acc:3196]	6.26	2.26	-1.47	0.02355	0.684189	yes	DOWN	N	N	N	Y	Y	6.46	2.2
TBIG010645	ENSRNOG00000010555.L01	LOC102551958	phytanoyl-CoA hydroxylase-interacting protein-like [Source:RGD Symbol;Acc:7719585]	22.7	9.14	-1.31	0.0236	0.684189	yes	DOWN	N	N	N	Y	Y	23.37	8.87
TBIG022290	ENSRNOG00000007892.L01	Tram1	translocation associated membrane protein 1 [Source:RGD Symbol;Acc:1359100]	109	39.1	-1.48	0.0237	0.684189	yes	DOWN	N	N	N	Y	Y	112.76	37.97
TBIG027765	XLOC_027765	-	-	9.01	1.46	-2.62	0.0238	0.684189	yes	DOWN	N	N	N	Y	Y	9.29	1.42
TBIG004091	XLOC_004091	-	-	0.711	0	#NAME?	0.02405	0.684189	yes	DOWN	N	N	N	Y	Y	0.73	0
TBIG006893	ENSRNOG00000048513	AABR06067067.1	Uncharacterized protein [Source:UniProtKB/TrEMBL;Acc:D3ZEC8]	2.3	0	#NAME?	0.02405	0.684189	yes	DOWN	N	N	N	Y	Y	2.37	0
TBIG010245	XLOC_010245	-	-	0.974	0	#NAME?	0.02405	0.684189	yes	DOWN	N	N	N	Y	Y	1	0
TBIG011790	XLOC_011790	-	-	1.59	0	#NAME?	0.02405	0.684189	yes	DOWN	N	N	N	Y	Y	1.64	0
TBIG013144	XLOC_013144	-	-	0.641	0	#NAME?	0.02405	0.684189	yes	DOWN	N	N	N	Y	Y	0.66	0
TBIG014558	ENSRNOG00000050326	AABR06098835.2	Uncharacterized protein [Source:UniProtKB/TrEMBL;Acc:M0R5I2]	0.994	0	#NAME?	0.02405	0.684189	yes	DOWN	N	N	N	Y	Y	1.02	0
TBIG016674	XLOC_016674	-	-	0.676	0	#NAME?	0.02405	0.684189	yes	DOWN	N	N	N	Y	Y	0.7	0
TBIG018091	XLOC_018091	KV5A3_MOUSE	Ig kappa chain V-V region K2 [Source:SWISS;Acc:P01635]	3.18	0	#NAME?	0.02405	0.684189	yes	DOWN	N	N	N	Y	Y	3.28	0
TBIG020003	XLOC_020003	-	-	0.619	0	#NAME?	0.02405	0.684189	yes	DOWN	N	N	N	Y	Y	0.64	0
TBIG021919	XLOC_021919	Pol	Retrovirus-related Pol polyprotein LINE-1 [Source:SWISS;Acc:P11369]	0.701	0	#NAME?	0.02405	0.684189	yes	DOWN	N	N	N	Y	Y	0.72	0
TBIG023801	XLOC_023801	-	-	0.745	0	#NAME?	0.02405	0.684189	yes	DOWN	N	N	N	Y	Y	0.77	0
TBIG024099	XLOC_024099	-	-	1.38	0	#NAME?	0.02405	0.684189	yes	DOWN	N	N	N	Y	Y	1.42	0
TBIG025369	XLOC_025369	-	-	0.627	0	#NAME?	0.02405	0.684189	yes	DOWN	N	N	N	Y	Y	0.65	0
TBIG025458	XLOC_025458	-	-	0.735	0	#NAME?	0.02405	0.684189	yes	DOWN	N	N	N	Y	Y	0.76	0
TBIG028968	XLOC_028968	-	-	0.658	0	#NAME?	0.02405	0.684189	yes	DOWN	N	N	N	Y	Y	0.68	0
TBIG030237	XLOC_030237	-	-	0.726	0	#NAME?	0.02405	0.684189	yes	DOWN	N	N	N	Y	Y	0.75	0
TBIG015331	ENSRNOG00000010866.L01	Tmem154	transmembrane protein 154 [Source:RGD Symbol;Acc:1563262]	18.2	5.55	-1.71	0.02425	0.685073	yes	DOWN	N	N	N	Y	Y	18.74	5.39
TBIG020612	ENSRNOG00000045771.L01	Chl1	cell adhesion molecule L1-like [Source:RGD Symbol;Acc:620122]	7.95	3.22	-1.3	0.0243	0.685073	yes	DOWN	N	N	N	Y	Y	8.2	3.13
TBIG000810	ENSRNOG00000012494.L01	Kctd14	potassium channel tetramerization domain containing 14 [Source:RGD Symbol;Acc:1306430]	34.5	12.5	-1.47	0.02455	0.685073	yes	DOWN	N	N	N	Y	Y	35.62	12.12
TBIG016038	ENSRNOG00000011763.L01	Serp1	stress-associated endoplasmic reticulum protein 1 [Source:RGD Symbol;Acc:620790]	158	45.8	-1.79	0.02455	0.685073	yes	DOWN	N	N	N	Y	Y	162.8	44.44
TBIG029379	ENSRNOG00000012535	Gpr115	G protein-coupled receptor 115 [Source:RGD Symbol;Acc:1565216]	4.31	1.1	-1.97	0.0249	0.687368	yes	DOWN	N	N	N	Y	Y	4.44	1.07
TBIG002280	ENSRNOG00000050806.L01	Spty2d1	SPT2, Suppressor of Ty, domain containing 1 (S. cerevisiae) [Source:RGD Symbol;Acc:2319415]	13.1	4.67	-1.49	0.025	0.688251	yes	DOWN	N	N	N	Y	Y	13.55	4.54
TBIG009489	ENSRNOG00000002408.L01	Rbm47	RNA binding motif protein 47 [Source:RGD Symbol;Acc:1359713]	22.8	9.17	-1.31	0.02505	0.688251	yes	DOWN	N	N	N	Y	Y	23.5	8.91
TBIG000801	ENSRNOG00000010630.L01	Prcp	prolylcarboxypeptidase (angiotensinase C) [Source:RGD Symbol;Acc:1307842]	12	4.21	-1.51	0.0251	0.688251	yes	DOWN	N	N	N	Y	Y	12.35	4.09
TBIG000324	ENSRNOG00000015948	Slc1a5	solute carrier family 1 (neutral amino acid transporter), member 5 [Source:RGD Symbol;Acc:708512]	25.9	10.4	-1.31	0.0252	0.689148	yes	DOWN	N	N	N	Y	Y	26.71	10.1
TBIG019233	ENSRNOG00000009399.L01	RGD1311224	similar to fatty acid desaturase 2; linoleoyl-CoA desaturase (delta-6-desaturase)-like 2; delta-6 fatty acid desaturase [Source:RGD Symbol;Acc:1311224]	15.7	5.36	-1.55	0.02545	0.692287	yes	DOWN	N	N	N	Y	Y	16.14	5.2
TBIG021073	ENSRNOG00000019939.L01	Ccnd2	cyclin D2 [Source:RGD Symbol;Acc:621083]	73.7	25.7	-1.52	0.02565	0.696314	yes	DOWN	N	N	N	Y	Y	75.98	24.96
TBIG012879	ENSRNOG00000017713.L01	Prss16	protease, serine, 16 (thymus) [Source:RGD Symbol;Acc:1306652]	2.07	0.631	-1.72	0.0257	0.696314	yes	DOWN	N	N	N	Y	Y	2.14	0.61
TBIG015773	ENSRNOG00000016122	Hmgcr	3-hydroxy-3-methylglutaryl-CoA reductase [Source:RGD Symbol;Acc:2803]	20.5	8.17	-1.33	0.0262	0.701334	yes	DOWN	N	N	N	Y	Y	21.19	7.93
TBIG016224	ENSRNOG00000021134.L01	Anxa9	annexin A9 [Source:RGD Symbol;Acc:1587550]	9.44	2.58	-1.87	0.02635	0.701334	yes	DOWN	N	N	N	Y	Y	9.73	2.51
TBIG017225	ENSRNOG00000000632.L01	Cdk1	cyclin-dependent kinase 1 [Source:RGD Symbol;Acc:2319]	10.7	2.64	-2.02	0.0265	0.701334	yes	DOWN	N	N	N	Y	Y	11.01	2.56
TBIG022378	ENSRNOG00000006170.L01	Bach2	BTB and CNC homology 1, basic leucine zipper transcription factor 2 [Source:RGD Symbol;Acc:1562865]	3.02	0.979	-1.63	0.02655	0.701334	yes	DOWN	N	N	N	Y	Y	3.11	0.95
TBIG027954	ENSRNOG00000029055.L01	Ttk	Ttk protein kinase [Source:RGD Symbol;Acc:1305558]	1.69	0.28	-2.59	0.02655	0.701334	yes	DOWN	N	N	N	Y	Y	1.74	0.27
TBIG019396	ENSRNOG00000013452.L01	Rcn1	reticulocalbin 1, EF-hand calcium binding domain [Source:RGD Symbol;Acc:1311292]	106	38.2	-1.48	0.02675	0.701334	yes	DOWN	N	N	N	Y	Y	109.86	37.08
TBIG028386	ENSRNOG00000008305.L01	Sc5d	sterol-C5-desaturase [Source:RGD Symbol;Acc:620775]	20.6	7.72	-1.42	0.02685	0.701334	yes	DOWN	N	N	N	Y	Y	21.23	7.5
TBIG020475	ENSRNOG00000007234	Cyp51	cytochrome P450, family 51 [Source:RGD Symbol;Acc:2481]	22.8	9.02	-1.34	0.0272	0.701334	yes	DOWN	N	N	N	Y	Y	23.55	8.76
TBIG019544	ENSRNOG00000017550.L01	Fbln7	fibulin 7 [Source:RGD Symbol;Acc:1310131]	3.96	1.19	-1.74	0.02725	0.701334	yes	DOWN	N	N	N	Y	Y	4.09	1.15
TBIG003202	XLOC_003202	-	-	5.53	0	#NAME?	0.0274	0.701334	yes	DOWN	N	N	N	Y	Y	5.7	0
TBIG006632	XLOC_006632	-	-	1.05	0	#NAME?	0.0274	0.701334	yes	DOWN	N	N	N	Y	Y	1.08	0
TBIG008519	ENSRNOG00000031599	Sh2d1b	SH2 domain containing 1B [Source:RGD Symbol;Acc:1563935]	1.87	0	#NAME?	0.0274	0.701334	yes	DOWN	N	N	N	Y	Y	1.93	0
TBIG009286	XLOC_009286	-	-	25.1	0	#NAME?	0.0274	0.701334	yes	DOWN	N	N	N	Y	Y	25.92	0
TBIG012163	XLOC_012163	-	-	0.592	0	#NAME?	0.0274	0.701334	yes	DOWN	N	N	N	Y	Y	0.61	0
TBIG012243	XLOC_012243	-	-	0.831	0	#NAME?	0.0274	0.701334	yes	DOWN	N	N	N	Y	Y	0.86	0
TBIG014750	XLOC_014750	-	-	2.71	0	#NAME?	0.0274	0.701334	yes	DOWN	N	N	N	Y	Y	2.8	0
TBIG019442	XLOC_019442	Ryr3	Ryanodine receptor 3 [Source:SWISS;Acc:A2AGL3]	0.629	0	#NAME?	0.0274	0.701334	yes	DOWN	N	N	N	Y	Y	0.65	0
TBIG021979	XLOC_021979	-	-	0.635	0	#NAME?	0.0274	0.701334	yes	DOWN	N	N	N	Y	Y	0.66	0
TBIG023747	XLOC_023747	-	-	0.941	0	#NAME?	0.0274	0.701334	yes	DOWN	N	N	N	Y	Y	0.97	0
TBIG025328	XLOC_025328	-	-	0.96	0	#NAME?	0.0274	0.701334	yes	DOWN	N	N	N	Y	Y	0.99	0
TBIG025216	ENSRNOG00000050118	AABR06046556.2	RCG21066; Uncharacterized protein [Source:UniProtKB/TrEMBL;Acc:D3ZJW6]	2.76	0	#NAME?	0.0274	0.701334	yes	DOWN	N	N	N	Y	Y	2.84	0
TBIG030279	XLOC_030279	-	-	1.44	0	#NAME?	0.0274	0.701334	yes	DOWN	N	N	N	Y	Y	1.49	0
TBIG003227	ENSRNOG00000013443.L01	Tm9sf3	transmembrane 9 superfamily member 3 [Source:RGD Symbol;Acc:1564625]	142	40.1	-1.82	0.02745	0.701334	yes	DOWN	N	N	N	Y	Y	146.54	38.98
TBIG030019	ENSRNOG00000014960.L01	Bard1	BRCA1 associated RING domain 1 [Source:RGD Symbol;Acc:621072]	1.57	0.285	-2.46	0.0275	0.701334	yes	DOWN	N	N	N	Y	Y	1.61	0.28
TBIG008424	ENSRNOG00000012318.L01	Aspm	asp (abnormal spindle) homolog, microcephaly associated (Drosophila) [Source:RGD Symbol;Acc:1307111]	2.95	1.02	-1.53	0.0276	0.701334	yes	DOWN	N	N	N	Y	Y	3.04	0.99
TBIG002259	ENSRNOG00000021011.L01	Fut2	fucosyltransferase 2 (secretor status included) [Source:RGD Symbol;Acc:2639]	28.4	11.6	-1.29	0.02765	0.701334	yes	DOWN	N	N	N	Y	Y	29.28	11.27
TBIG006399	XLOC_006399	pol	Pol polyprotein [Source:SWISS;Acc:P10272]	3.11	0.95	-1.71	0.0277	0.701334	yes	DOWN	N	N	N	Y	Y	3.2	0.92
TBIG010742	ENSRNOG00000010516.L01	Plau	plasminogen activator, urokinase [Source:RGD Symbol;Acc:3343]	30.5	12.3	-1.31	0.0277	0.701334	yes	DOWN	N	N	N	Y	Y	31.44	11.94
TBIG009447	ENSRNOG00000002024.L01	Epha5	EPH receptor A5 [Source:RGD Symbol;Acc:620831]	2.45	0.476	-2.37	0.0278	0.70213	yes	DOWN	N	N	N	Y	Y	2.53	0.46
TBIG008168	XLOC_008168	pol	Pol polyprotein [Source:SWISS;Acc:P11227]	36.4	13.4	-1.44	0.0279	0.702922	yes	DOWN	N	N	N	Y	Y	37.52	12.98
TBIG015330	ENSRNOG00000010741.L01	Tigd4	tigger transposable element derived 4 [Source:RGD Symbol;Acc:1305780]	1.53	0.226	-2.76	0.028	0.704575	yes	DOWN	N	N	N	Y	Y	1.58	0.22
TBIG008443	ENSRNOG00000028358.L01	Edem3	ER degradation enhancer, mannosidase alpha-like 3 [Source:RGD Symbol;Acc:1561496]	16.9	6.9	-1.29	0.0283	0.708547	yes	DOWN	N	N	N	Y	Y	17.39	6.7
TBIG022635	XLOC_022635	Skint2	Selection and upkeep of intraepithelial T-cells protein 2 [Source:SWISS;Acc:A7XUX6]	5.38	0.667	-3.01	0.0284	0.708547	yes	DOWN	N	N	N	Y	Y	5.54	0.65
TBIG000730	ENSRNOG00000019776.L01	Sh3gl3	SH3-domain GRB2-like 3 [Source:RGD Symbol;Acc:620578]	5.22	1.16	-2.17	0.0285	0.709696	yes	DOWN	N	N	N	Y	Y	5.39	1.13
TBIG019528	ENSRNOG00000012051.L01	Ncaph	non-SMC condensin I complex, subunit H [Source:RGD Symbol;Acc:1596799]	2.82	0.437	-2.69	0.02855	0.709696	yes	DOWN	N	N	N	Y	Y	2.91	0.42
TBIG030795	ENSRNOG00000003746.L01	Gjb1	gap junction protein, beta 1 [Source:RGD Symbol;Acc:61926]	20.5	7.09	-1.53	0.02855	0.709696	yes	DOWN	N	N	N	Y	Y	21.09	6.89
TBIG001711	ENSRNOG00000015321	Moxd1	monooxygenase, DBH-like 1 [Source:RGD Symbol;Acc:1310033]	5.13	1.37	-1.9	0.0288	0.711011	yes	DOWN	N	N	N	Y	Y	5.29	1.33
TBIG024381	ENSRNOG00000023316.L01	Grhl1	grainyhead-like 1 (Drosophila) [Source:RGD Symbol;Acc:1305735]	15.7	6.6	-1.26	0.0289	0.711011	yes	DOWN	N	N	N	Y	Y	16.24	6.4
TBIG030706	ENSRNOG00000003705.L01	Bmx	BMX non-receptor tyrosine kinase [Source:RGD Symbol;Acc:1565643]	33.1	10.2	-1.69	0.0294	0.719475	yes	DOWN	N	N	N	Y	Y	34.11	9.95
TBIG014641	XLOC_014641	-	-	2.71	0.564	-2.27	0.0296	0.722642	yes	DOWN	N	N	N	Y	Y	2.8	0.55
TBIG028613	ENSRNOG00000009330.L01	Slc17a5	solute carrier family 17 (acidic sugar transporter), member 5 [Source:RGD Symbol;Acc:1311388]	9.57	3.33	-1.52	0.02975	0.723716	yes	DOWN	N	N	N	Y	Y	9.87	3.23
TBIG011108	ENSRNOG00000022337	Slitrk6	SLIT and NTRK-like family, member 6 [Source:RGD Symbol;Acc:1306550]	17.7	7.12	-1.31	0.02995	0.725995	yes	DOWN	N	N	N	Y	Y	18.22	6.91
TBIG004292	ENSRNOG00000016026	RGD1562673	similar to Prostatic spermine-binding protein precursor (SBP) [Source:RGD Symbol;Acc:1562673]	16	3.59	-2.16	0.03025	0.729812	yes	DOWN	N	N	N	Y	Y	16.51	3.48
TBIG021466	ENSRNOG00000014617.L01	Tgoln2	trans-golgi network protein 2 [Source:RGD Symbol;Acc:620445]	116	39.4	-1.56	0.03035	0.730504	yes	DOWN	N	N	N	Y	Y	120.1	38.28
TBIG010041	ENSRNOG00000004332.L01	Egfr	epidermal growth factor receptor [Source:RGD Symbol;Acc:2543]	8.53	3.61	-1.24	0.03065	0.73256	yes	DOWN	N	N	N	Y	Y	8.79	3.51
TBIG005828	ENSRNOG00000014070.L01	Krt13	keratin 13 [Source:RGD Symbol;Acc:1302937]	394	114	-1.79	0.0308	0.734431	yes	DOWN	N	N	N	Y	Y	406.31	110.71
TBIG016335	ENSRNOG00000012149.L01	Gpsm2	G-protein signaling modulator 2 [Source:RGD Symbol;Acc:1560967]	7.99	2.8	-1.51	0.0308	0.734431	yes	DOWN	N	N	N	Y	Y	8.24	2.72
TBIG029378	ENSRNOG00000025603.L01	Gpr111	G protein-coupled receptor 111 [Source:RGD Symbol;Acc:1306718]	1.91	0.444	-2.1	0.03085	0.734768	yes	DOWN	N	N	N	Y	Y	1.97	0.43
TBIG031421	ENSRNOG00000002487.L01	Mbnl3	muscleblind-like splicing regulator 3 [Source:RGD Symbol;Acc:1565834]	6.87	2.84	-1.27	0.03095	0.735774	yes	DOWN	N	N	N	Y	Y	7.08	2.76
TBIG029967	ENSRNOG00000013388.L01	Pgap1	post-GPI attachment to proteins 1 [Source:RGD Symbol;Acc:1303213]	3.44	1.36	-1.34	0.03135	0.741504	yes	DOWN	N	N	N	Y	Y	3.55	1.32
TBIG009506	ENSRNOG00000002209.L01	Arap2	ArfGAP with RhoGAP domain, ankyrin repeat and PH domain 2 [Source:RGD Symbol;Acc:1306452]	10.6	4.42	-1.26	0.0314	0.74183	yes	DOWN	N	N	N	Y	Y	10.92	4.29
TBIG018682	ENSRNOG00000012197.L01	Bpifb2	BPI fold containing family B, member 2 [Source:RGD Symbol;Acc:1310866]	848	138	-2.62	0.03165	0.746015	yes	DOWN	N	N	N	Y	Y	874.7	133.9
TBIG026985	ENSRNOG00000033059.L01	Galnt6	polypeptide N-acetylgalactosaminyltransferase 6 [Source:RGD Symbol;Acc:2319726]	41.3	16.8	-1.3	0.0318	0.748689	yes	DOWN	N	N	N	Y	Y	42.59	16.32
TBIG011081	ENSRNOG00000038068.L01	Pcdh9	protocadherin 9 [Source:RGD Symbol;Acc:1306348]	2.52	0.599	-2.07	0.03185	0.749005	yes	DOWN	N	N	N	Y	Y	2.6	0.58
TBIG021243	XLOC_021243	-	-	2.33	0.383	-2.61	0.03195	0.749407	yes	DOWN	N	N	N	Y	Y	2.41	0.37
TBIG030018	ENSRNOG00000027430.L01	Ikzf2	IKAROS family zinc finger 2 [Source:RGD Symbol;Acc:1308686]	16.5	6.97	-1.24	0.032	0.749407	yes	DOWN	N	N	N	Y	Y	17.01	6.77
TBIG004479	ENSRNOG00000026844.L01	Lypd8	LY6/PLAUR domain containing 8 [Source:RGD Symbol;Acc:1586251]	8.34	0.621	-3.75	0.03205	0.749407	yes	DOWN	N	N	N	Y	Y	8.6	0.6
TBIG004875	ENSRNOG00000028404	Ppp1r1b	protein phosphatase 1, regulatory (inhibitor) subunit 1B [Source:RGD Symbol;Acc:621859]	50.7	21.4	-1.24	0.0326	0.757081	yes	DOWN	N	N	N	Y	Y	52.3	20.8
TBIG024753	ENSRNOG00000015059.L01	Mcfd2	multiple coagulation factor deficiency 2 [Source:RGD Symbol;Acc:628690]	89.6	29.9	-1.58	0.03295	0.760336	yes	DOWN	N	N	N	Y	Y	92.41	29.01
TBIG018379	XLOC_018379	-	-	17	5.79	-1.55	0.033	0.760336	yes	DOWN	N	N	N	Y	Y	17.54	5.62
TBIG011055	ENSRNOG00000001052.L01	Slc25a30	solute carrier family 25, member 30 [Source:RGD Symbol;Acc:1359702]	12.1	4.89	-1.31	0.0331	0.760929	yes	DOWN	N	N	N	Y	Y	12.47	4.75
TBIG019137	ENSRNOG00000012105.L01	Tbc1d8b	TBC1 domain family, member 8B (with GRAM domain) [Source:RGD Symbol;Acc:1563084]	6.77	1.75	-1.95	0.0334	0.766105	yes	DOWN	N	N	N	Y	Y	6.98	1.7
TBIG026687	ENSRNOG00000024929.L01	Nudcd1	NudC domain containing 1 [Source:RGD Symbol;Acc:1310624]	8.69	3.3	-1.4	0.0336	0.766123	yes	DOWN	N	N	N	Y	Y	8.96	3.2
TBIG027762	ENSRNOG00000018778.L01	Cadm1	cell adhesion molecule 1 [Source:RGD Symbol;Acc:1310999]	5.41	1.75	-1.63	0.0336	0.766123	yes	DOWN	N	N	N	Y	Y	5.58	1.7
TBIG018436	ENSRNOG00000005814.L01	Katnbl1	katanin p80 subunit B-like 1 [Source:RGD Symbol;Acc:1582771]	5.44	1.27	-2.1	0.03365	0.766123	yes	DOWN	N	N	N	Y	Y	5.61	1.23
TBIG024133	XLOC_024133	-	-	1.86	0.303	-2.62	0.03365	0.766123	yes	DOWN	N	N	N	Y	Y	1.92	0.29
TBIG018552	ENSRNOG00000026143.L01	Ckap2l	cytoskeleton associated protein 2-like [Source:RGD Symbol;Acc:1590645]	2.9	0.739	-1.97	0.0337	0.766123	yes	DOWN	N	N	N	Y	Y	2.99	0.72
TBIG020754	ENSRNOG00000006069	Eif2ak3	eukaryotic translation initiation factor 2 alpha kinase 3 [Source:RGD Symbol;Acc:70884]	24.9	10.5	-1.25	0.0337	0.766123	yes	DOWN	N	N	N	Y	Y	25.64	10.17
TBIG019594	ENSRNOG00000004951.L01	Kif16b	kinesin family member 16B [Source:RGD Symbol;Acc:1310146]	8.9	3.75	-1.24	0.03375	0.766132	yes	DOWN	N	N	N	Y	Y	9.18	3.64
TBIG003126	ENSRNOG00000013971.L01	Psat1	phosphoserine aminotransferase 1 [Source:RGD Symbol;Acc:735170]	10.2	3.19	-1.67	0.03385	0.766132	yes	DOWN	N	N	N	Y	Y	10.48	3.1
TBIG028602	ENSRNOG00000011925.L01	Fam83b	family with sequence similarity 83, member B [Source:RGD Symbol;Acc:1311988]	4.36	1.7	-1.36	0.03385	0.766132	yes	DOWN	N	N	N	Y	Y	4.5	1.65
TBIG002391	ENSRNOG00000012442.L01	Cemip	cell migration inducing protein, hyaluronan binding [Source:RGD Symbol;Acc:1305254]	0.736	0.101	-2.87	0.03395	0.766424	yes	DOWN	N	N	N	Y	Y	0.76	0.1
TBIG028216	ENSRNOG00000010887.L01	RGD1309534	similar to RIKEN cDNA 4931406C07 [Source:RGD Symbol;Acc:1309534]	59.5	23.8	-1.32	0.03395	0.766424	yes	DOWN	N	N	N	Y	Y	61.38	23.1
TBIG026788	ENSRNOG00000023828.L01	LOC680875	similar to dystonin isoform 1 [Source:RGD Symbol;Acc:1587008]	19.9	6.71	-1.57	0.03405	0.766424	yes	DOWN	N	N	N	Y	Y	20.52	6.51
TBIG022434	ENSRNOG00000013598.L01	Melk	maternal embryonic leucine zipper kinase [Source:RGD Symbol;Acc:1308974]	1.57	0.25	-2.65	0.03415	0.767831	yes	DOWN	N	N	N	Y	Y	1.62	0.24
TBIG019446	ENSRNOG00000008115.L01	Arhgap11a	Rho GTPase activating protein 11A [Source:RGD Symbol;Acc:1309107]	4.15	1.39	-1.58	0.0342	0.768113	yes	DOWN	N	N	N	Y	Y	4.28	1.35
TBIG015800	ENSRNOG00000018635.L01	Ccnb1	cyclin B1 [Source:RGD Symbol;Acc:2291]	7.5	2.07	-1.86	0.03485	0.774706	yes	DOWN	N	N	N	Y	Y	7.74	2.01
TBIG029748	ENSRNOG00000037227.L01	Yes1	Yamaguchi sarcoma viral (v-yes) oncogene homolog 1 [Source:RGD Symbol;Acc:3977]	15.8	6.05	-1.39	0.0349	0.774706	yes	DOWN	N	N	N	Y	Y	16.31	5.87
TBIG019393	ENSRNOG00000022710.L01	Prrg4	proline rich Gla (G-carboxyglutamic acid) 4 (transmembrane) [Source:RGD Symbol;Acc:1560542]	10.7	4.61	-1.21	0.03495	0.774706	yes	DOWN	N	N	N	Y	Y	11.01	4.48
TBIG000562	ENSRNOG00000018742.L01	Klk11	kallikrein related-peptidase 11 [Source:RGD Symbol;Acc:1308690]	4.89	0.538	-3.18	0.03505	0.774706	yes	DOWN	N	N	N	Y	Y	5.04	0.52
TBIG004995	XLOC_004995	-	-	3.15	1.1	-1.51	0.03525	0.774706	yes	DOWN	N	N	N	Y	Y	3.25	1.07
TBIG028443	ENSRNOG00000010260.L01	Dixdc1	DIX domain containing 1 [Source:RGD Symbol;Acc:1309902]	9.01	3.45	-1.39	0.03525	0.774706	yes	DOWN	N	N	N	Y	Y	9.29	3.35
TBIG020978	ENSRNOG00000007944.L01	Edem1	ER degradation enhancer, mannosidase alpha-like 1 [Source:RGD Symbol;Acc:1563633]	20	8.67	-1.2	0.0354	0.776336	yes	DOWN	N	N	N	Y	Y	20.59	8.42
TBIG031430	ENSRNOG00000022684	Gpc3	glypican 3 [Source:RGD Symbol;Acc:2725]	48.6	21	-1.21	0.03555	0.77796	yes	DOWN	N	N	N	Y	Y	50.14	20.36
TBIG009984	ENSRNOG00000017775.L01	Slc5a1	solute carrier family 5 (sodium/glucose cotransporter), member 1 [Source:RGD Symbol;Acc:3713]	2.45	0.592	-2.05	0.0358	0.781761	yes	DOWN	N	N	N	Y	Y	2.53	0.57
TBIG026729	XLOC_026729	FAM84B	Protein FAM84B [Source:SWISS;Acc:Q96KN1]	10	4	-1.32	0.03615	0.786978	yes	DOWN	N	N	N	Y	Y	10.32	3.88
TBIG026740	ENSRNOG00000008209.L01	St3gal1	ST3 beta-galactoside alpha-2,3-sialyltransferase 1 [Source:RGD Symbol;Acc:1309373]	44.6	11.7	-1.93	0.0362	0.786978	yes	DOWN	N	N	N	Y	Y	46.01	11.4
TBIG006751	ENSRNOG00000032327.L01	Pdia5	protein disulfide isomerase family A, member 5 [Source:RGD Symbol;Acc:1359236]	12	4.45	-1.43	0.03625	0.786978	yes	DOWN	N	N	N	Y	Y	12.35	4.32
TBIG010604	ENSRNOG00000015921	Esco2	establishment of sister chromatid cohesion N-acetyltransferase 2 [Source:RGD Symbol;Acc:1593313]	1.81	0.431	-2.07	0.0363	0.786978	yes	DOWN	N	N	N	Y	Y	1.86	0.42
TBIG008389	ENSRNOG00000003183	Fmod	fibromodulin [Source:RGD Symbol;Acc:619769]	11.4	4.46	-1.35	0.03635	0.786978	yes	DOWN	N	N	N	Y	Y	11.73	4.33
TBIG027249	XLOC_027249	pol	Pol polyprotein [Source:SWISS;Acc:P31623]	1.53	0.264	-2.53	0.03645	0.786978	yes	DOWN	N	N	N	Y	Y	1.57	0.26
TBIG014282	ENSRNOG00000016752.L01	Crispld2	cysteine-rich secretory protein LCCL domain containing 2 [Source:RGD Symbol;Acc:620860]	24	10.2	-1.23	0.0367	0.790459	yes	DOWN	N	N	N	Y	Y	24.73	9.92
TBIG029262	ENSRNOG00000022499.L01	Sgol1	shugoshin-like 1 (S. pombe) [Source:RGD Symbol;Acc:1593238]	1.14	0.129	-3.15	0.037	0.794511	yes	DOWN	N	N	N	Y	Y	1.18	0.13
TBIG010626	ENSRNOG00000014398.L01	Scara5	scavenger receptor class A, member 5 [Source:RGD Symbol;Acc:1306539]	36.6	14.7	-1.31	0.0372	0.794511	yes	DOWN	N	N	N	Y	Y	37.77	14.29
TBIG005267	ENSRNOG00000003508.L01	Ergic1	endoplasmic reticulum-golgi intermediate compartment (ERGIC) 1 [Source:RGD Symbol;Acc:1585015]	42.3	14.9	-1.5	0.0375	0.794511	yes	DOWN	N	N	N	Y	Y	43.6	14.49
TBIG013034	XLOC_013034	-	-	5.36	0.991	-2.44	0.03755	0.794511	yes	DOWN	N	N	N	Y	Y	5.53	0.96
TBIG026705	ENSRNOG00000004089.L01	Enpp2	ectonucleotide pyrophosphatase/phosphodiesterase 2 [Source:RGD Symbol;Acc:69298]	25.4	9.72	-1.39	0.0381	0.794511	yes	DOWN	N	N	N	Y	Y	26.2	9.44
TBIG018609	ENSRNOG00000008411.L01	Sec23b	Sec23 homolog B (S. cerevisiae) [Source:RGD Symbol;Acc:1310699]	105	40.6	-1.37	0.03815	0.794511	yes	DOWN	N	N	N	Y	Y	108.39	39.39
TBIG000040	ENSRNOG00000012286.L01	Il20ra	interleukin 20 receptor, alpha [Source:RGD Symbol;Acc:1307335]	8.95	2.81	-1.67	0.03825	0.794511	yes	DOWN	N	N	N	Y	Y	9.23	2.73
TBIG003190	XLOC_003190	Acta2	Actin, aortic smooth muscle [Source:SWISS;Acc:P62738]	86.2	36.5	-1.24	0.03825	0.794511	yes	DOWN	N	N	N	Y	Y	88.96	35.38
TBIG021936	XLOC_021936	env	Envelope glycoprotein [Source:SWISS;Acc:P31789]	2.52	0.601	-2.07	0.03845	0.794511	yes	DOWN	N	N	N	Y	Y	2.6	0.58
TBIG003434	XLOC_003434	-	-	0.808	0	#NAME?	0.03875	0.794511	yes	DOWN	N	N	N	Y	Y	0.83	0
TBIG001913	ENSRNOG00000015956.L01	Usp29	ubiquitin specific peptidase 29 [Source:RGD Symbol;Acc:1306648]	2.79	0.734	-1.93	0.03875	0.794511	yes	DOWN	N	N	N	Y	Y	2.88	0.71
TBIG004068	XLOC_004068	-	-	0.676	0	#NAME?	0.03875	0.794511	yes	DOWN	N	N	N	Y	Y	0.7	0
TBIG006182	XLOC_006182	Sowaha	Ankyrin repeat domain-containing protein SOWAHA [Source:SWISS;Acc:Q8BLS7]	0.587	0	#NAME?	0.03875	0.794511	yes	DOWN	N	N	N	Y	Y	0.61	0
TBIG006396	XLOC_006396	-	-	0.588	0	#NAME?	0.03875	0.794511	yes	DOWN	N	N	N	Y	Y	0.61	0
TBIG007294	XLOC_007294	-	-	0.651	0	#NAME?	0.03875	0.794511	yes	DOWN	N	N	N	Y	Y	0.67	0
TBIG008105	XLOC_008105	-	-	3.75	0	#NAME?	0.03875	0.794511	yes	DOWN	N	N	N	Y	Y	3.87	0
TBIG008116	XLOC_008116	Nedd4	E3 ubiquitin-protein ligase NEDD4 [Source:SWISS;Acc:P46935]	0.622	0	#NAME?	0.03875	0.794511	yes	DOWN	N	N	N	Y	Y	0.64	0
TBIG008761	XLOC_008761	-	-	0.687	0	#NAME?	0.03875	0.794511	yes	DOWN	N	N	N	Y	Y	0.71	0
TBIG009638	ENSRNOG00000045699	AABR06080605.1	Uncharacterized protein [Source:UniProtKB/TrEMBL;Acc:F1LUV6]	1.07	0	#NAME?	0.03875	0.794511	yes	DOWN	N	N	N	Y	Y	1.1	0
TBIG010280	XLOC_010280	-	-	1.25	0	#NAME?	0.03875	0.794511	yes	DOWN	N	N	N	Y	Y	1.29	0
TBIG011135	XLOC_011135	-	-	0.581	0	#NAME?	0.03875	0.794511	yes	DOWN	N	N	N	Y	Y	0.6	0
TBIG012055	XLOC_012055	-	-	1.66	0	#NAME?	0.03875	0.794511	yes	DOWN	N	N	N	Y	Y	1.71	0
TBIG012162	XLOC_012162	-	-	0.593	0	#NAME?	0.03875	0.794511	yes	DOWN	N	N	N	Y	Y	0.61	0
TBIG012009	ENSRNOG00000013939	Defb4	defensin beta 4 [Source:RGD Symbol;Acc:619944]	1.45	0	#NAME?	0.03875	0.794511	yes	DOWN	N	N	N	Y	Y	1.5	0
TBIG012240	XLOC_012240	-	-	0.808	0	#NAME?	0.03875	0.794511	yes	DOWN	N	N	N	Y	Y	0.83	0
TBIG014755	XLOC_014755	-	-	2.26	0	#NAME?	0.03875	0.794511	yes	DOWN	N	N	N	Y	Y	2.33	0
TBIG015067	ENSRNOG00000051143	Ranbp3l	RAN binding protein 3-like [Source:RGD Symbol;Acc:1307559]	1.64	0	#NAME?	0.03875	0.794511	yes	DOWN	N	N	N	Y	Y	1.69	0
TBIG017399	ENSRNOG00000048140	AABR06099752.1	Uncharacterized protein [Source:UniProtKB/TrEMBL;Acc:M0RBQ7]	3.65	0	#NAME?	0.03875	0.794511	yes	DOWN	N	N	N	Y	Y	3.77	0
TBIG018068	ENSRNOG00000049909	AABR06022404.1	Uncharacterized protein [Source:UniProtKB/TrEMBL;Acc:M0RBK4]	1.63	0	#NAME?	0.03875	0.794511	yes	DOWN	N	N	N	Y	Y	1.68	0
TBIG020340	XLOC_020340	-	-	0.837	0	#NAME?	0.03875	0.794511	yes	DOWN	N	N	N	Y	Y	0.86	0
TBIG025227	ENSRNOG00000048159	AABR06046593.1	Uncharacterized protein [Source:UniProtKB/TrEMBL;Acc:M0R7Q2]	2.45	0	#NAME?	0.03875	0.794511	yes	DOWN	N	N	N	Y	Y	2.52	0
TBIG027096	XLOC_027096	-	-	0.714	0	#NAME?	0.03875	0.794511	yes	DOWN	N	N	N	Y	Y	0.74	0
TBIG027197	XLOC_027197	-	-	0.67	0	#NAME?	0.03875	0.794511	yes	DOWN	N	N	N	Y	Y	0.69	0
TBIG030331	XLOC_030331	-	-	2.13	0	#NAME?	0.03875	0.794511	yes	DOWN	N	N	N	Y	Y	2.2	0
TBIG030539	XLOC_030539	Ace2	Angiotensin-converting enzyme 2 [Source:SWISS;Acc:Q5EGZ1]	10.2	0	#NAME?	0.03875	0.794511	yes	DOWN	N	N	N	Y	Y	10.53	0
TBIG031546	XLOC_031546	-	-	0.805	0	#NAME?	0.03875	0.794511	yes	DOWN	N	N	N	Y	Y	0.83	0
TBIG031562	XLOC_031562	Pol	Retrovirus-related Pol polyprotein LINE-1 [Source:SWISS;Acc:P11369]	0.789	0	#NAME?	0.03875	0.794511	yes	DOWN	N	N	N	Y	Y	0.81	0
TBIG015959	ENSRNOG00000024089.L01	Fndc3b	fibronectin type III domain containing 3B [Source:RGD Symbol;Acc:1311673]	14	6.11	-1.2	0.03895	0.796674	yes	DOWN	N	N	N	Y	Y	14.45	5.93
TBIG010412	ENSRNOG00000011377.L01	Socs4	suppressor of cytokine signaling 4 [Source:RGD Symbol;Acc:1306503]	5.49	1.88	-1.55	0.039	0.796674	yes	DOWN	N	N	N	Y	Y	5.66	1.82
TBIG017244	ENSRNOG00000000823.L01	Gcc2	GRIP and coiled-coil domain containing 2 [Source:RGD Symbol;Acc:1305732]	9.56	4.27	-1.16	0.0396	0.803892	yes	DOWN	N	N	N	Y	Y	9.86	4.15
TBIG016461	XLOC_016461	pol	Pol polyprotein [Source:SWISS;Acc:P03356]	1.94	0.471	-2.04	0.03975	0.804545	yes	DOWN	N	N	N	Y	Y	2	0.46
TBIG019689	ENSRNOG00000046772.L01	Fam83c	family with sequence similarity 83, member C [Source:RGD Symbol;Acc:1585687]	3.61	1.14	-1.66	0.03995	0.806099	yes	DOWN	N	N	N	Y	Y	3.73	1.11
TBIG016393	ENSRNOG00000011284.L01	Sgms2	sphingomyelin synthase 2 [Source:RGD Symbol;Acc:1305778]	3.76	1.26	-1.58	0.0404	0.806099	yes	DOWN	N	N	N	Y	Y	3.87	1.22
TBIG031249	ENSRNOG00000002429.L01	Zcchc5	zinc finger, CCHC domain containing 5 [Source:MGI Symbol;Acc:MGI:2685221]	4.74	1.55	-1.61	0.04055	0.806099	yes	DOWN	N	N	N	Y	Y	4.89	1.5
TBIG015715	ENSRNOG00000009503.L01	Depdc1	DEP domain containing 1 [Source:RGD Symbol;Acc:1306987]	2.2	0.202	-3.45	0.0408	0.806099	yes	DOWN	N	N	N	Y	Y	2.27	0.2
TBIG016161	ENSRNOG00000027903.L01	Trim46	tripartite motif-containing 46 [Source:RGD Symbol;Acc:1305993]	2.89	0.518	-2.48	0.0411	0.807919	yes	DOWN	N	N	N	Y	Y	2.98	0.5
TBIG006772	ENSRNOG00000001730.L01	Acap2	ArfGAP with coiled-coil, ankyrin repeat and PH domains 2 [Source:RGD Symbol;Acc:1562939]	9.23	3.81	-1.28	0.04145	0.813238	yes	DOWN	N	N	N	Y	Y	9.51	3.7
TBIG013533	ENSRNOG00000014104.L01	Myo5b	myosin Vb [Source:RGD Symbol;Acc:621347]	6.28	2.68	-1.23	0.04145	0.813238	yes	DOWN	N	N	N	Y	Y	6.47	2.6
TBIG004112	XLOC_004112	Larp4	La-related protein 4 [Source:SWISS;Acc:Q8BWW4]	10.8	2.02	-2.42	0.04185	0.819516	yes	DOWN	N	N	N	Y	Y	11.16	1.96
TBIG006895	ENSRNOG00000032834.L01	Hspa13	heat shock protein 70 family, member 13 [Source:RGD Symbol;Acc:3775]	13.1	5.8	-1.18	0.0419	0.819711	yes	DOWN	N	N	N	Y	Y	13.51	5.63
TBIG005190	XLOC_005190	-	-	2.67	0.672	-1.99	0.04205	0.820295	yes	DOWN	N	N	N	Y	Y	2.75	0.65
TBIG011045	ENSRNOG00000014478.L01	Fndc3a	fibronectin type III domain containing 3a [Source:RGD Symbol;Acc:1304736]	15.7	6.74	-1.22	0.04205	0.820295	yes	DOWN	N	N	N	Y	Y	16.19	6.54
TBIG011596	ENSRNOG00000010714	Fgl1	fibrinogen-like 1 [Source:RGD Symbol;Acc:620169]	6.5	1.65	-1.98	0.04205	0.820295	yes	DOWN	N	N	N	Y	Y	6.7	1.6
TBIG013090	XLOC_013090	-	-	3.33	0.219	-3.93	0.0421	0.820489	yes	DOWN	N	N	N	Y	Y	3.43	0.21
TBIG028655	ENSRNOG00000009945.L01	Pls1	plastin 1 [Source:RGD Symbol;Acc:1307142]	12	5.09	-1.23	0.04215	0.820677	yes	DOWN	N	N	N	Y	Y	12.35	4.95
TBIG016261	ENSRNOG00000019328	Phgdh	phosphoglycerate dehydrogenase [Source:RGD Symbol;Acc:61987]	10.8	3.54	-1.6	0.04235	0.820676	yes	DOWN	N	N	N	Y	Y	11.11	3.44
TBIG018228	ENSRNOG00000001547	Agps	alkylglycerone phosphate synthase [Source:RGD Symbol;Acc:620364]	17.9	6.46	-1.47	0.0425	0.822015	yes	DOWN	N	N	N	Y	Y	18.43	6.26
TBIG013462	ENSRNOG00000015971.L01	Slc12a2	solute carrier family 12 (sodium/potassium/chloride transporter), member 2 [Source:RGD Symbol;Acc:620809]	99.9	33.9	-1.56	0.04255	0.822015	yes	DOWN	N	N	N	Y	Y	102.95	32.97
TBIG004535	ENSRNOG00000002331	Aldh3a1	aldehyde dehydrogenase 3 family, member A1 [Source:RGD Symbol;Acc:2088]	138	56.2	-1.29	0.0427	0.822015	yes	DOWN	N	N	N	Y	Y	142	54.56
TBIG024443	XLOC_024443	-	-	3.59	1.24	-1.53	0.04285	0.823355	yes	DOWN	N	N	N	Y	Y	3.7	1.21
TBIG009454	ENSRNOG00000024689.L01	Hopx	HOP homeobox [Source:RGD Symbol;Acc:621841]	169	72.4	-1.22	0.0431	0.825835	yes	DOWN	N	N	N	Y	Y	174.53	70.28
TBIG011663	ENSRNOG00000024650	Ckap2	cytoskeleton associated protein 2 [Source:RGD Symbol;Acc:1311631]	4.65	1.4	-1.73	0.04335	0.8283	yes	DOWN	N	N	N	Y	Y	4.8	1.36
TBIG003145	ENSRNOG00000018282.L01	Gda	guanine deaminase [Source:RGD Symbol;Acc:621617]	110	40.1	-1.45	0.0436	0.828622	yes	DOWN	N	N	N	Y	Y	113.18	38.95
TBIG027724	ENSRNOG00000021771.L01	Trim29	tripartite motif-containing 29 [Source:RGD Symbol;Acc:1307858]	45.7	20.2	-1.17	0.04395	0.828939	yes	DOWN	N	N	N	Y	Y	47.1	19.64
TBIG012706	ENSRNOG00000015410	Aspn	asporin [Source:RGD Symbol;Acc:1549776]	4.6	1.18	-1.96	0.04465	0.833286	yes	DOWN	N	N	N	Y	Y	4.74	1.15
TBIG015437	ENSRNOG00000043445.L01	Them5	thioesterase superfamily member 5 [Source:RGD Symbol;Acc:1562059]	41.4	14.1	-1.55	0.0447	0.833286	yes	DOWN	N	N	N	Y	Y	42.73	13.69
TBIG031238	ENSRNOG00000021589.L01	RGD1561931	similar to KIAA2022 protein [Source:RGD Symbol;Acc:1561931]	1.19	0.361	-1.72	0.04475	0.833286	yes	DOWN	N	N	N	Y	Y	1.22	0.35
TBIG013598	ENSRNOG00000015867.L01	Chst9	carbohydrate (N-acetylgalactosamine 4-0) sulfotransferase 9 [Source:RGD Symbol;Acc:1307302]	18.6	8.14	-1.19	0.0448	0.833459	yes	DOWN	N	N	N	Y	Y	19.18	7.91
TBIG019716	ENSRNOG00000015794	Fam83d	family with sequence similarity 83, member D [Source:RGD Symbol;Acc:1565583]	2.76	0.507	-2.45	0.0452	0.840138	yes	DOWN	N	N	N	Y	Y	2.85	0.49
TBIG026667	ENSRNOG00000042978.L01	Ncald	neurocalcin delta [Source:RGD Symbol;Acc:1560287]	9.64	3.97	-1.28	0.04525	0.840304	yes	DOWN	N	N	N	Y	Y	9.94	3.85
TBIG027900	ENSRNOG00000017439.L01	Cgnl1	cingulin-like 1 [Source:RGD Symbol;Acc:1304623]	20.8	8.8	-1.24	0.0454	0.840803	yes	DOWN	N	N	N	Y	Y	21.41	8.54
TBIG009802	ENSRNOG00000010996.L02	Mob1b	MOB kinase activator 1B [Source:RGD Symbol;Acc:1305114]	15	6.46	-1.21	0.04585	0.846077	yes	DOWN	N	N	N	Y	Y	15.45	6.28
TBIG008654	ENSRNOG00000004487.L01	Nek2	NIMA-related kinase 2 [Source:RGD Symbol;Acc:619792]	1.57	0.237	-2.72	0.04625	0.849631	yes	DOWN	N	N	N	Y	Y	1.62	0.23
TBIG025936	ENSRNOG00000004476.L01	Wif1	Wnt inhibitory factor 1 [Source:RGD Symbol;Acc:619774]	10.7	4.07	-1.39	0.0463	0.849788	yes	DOWN	N	N	N	Y	Y	11	3.95
TBIG026255	ENSRNOG00000012835.L01	Espl1	extra spindle pole bodies homolog 1 (S. cerevisiae) [Source:RGD Symbol;Acc:1306266]	1.65	0.483	-1.77	0.04635	0.849944	yes	DOWN	N	N	N	Y	Y	1.7	0.47
TBIG014283	XLOC_014283	-	-	2.7	0.813	-1.73	0.04655	0.851325	yes	DOWN	N	N	N	Y	Y	2.78	0.79
TBIG005834	ENSRNOG00000014441	Krt16	keratin 16 [Source:RGD Symbol;Acc:1590901]	5.57	1.07	-2.39	0.04665	0.851633	yes	DOWN	N	N	N	Y	Y	5.75	1.03
TBIG019105	ENSRNOG00000027447.L01	Stam2	signal transducing adaptor molecule (SH3 domain and ITAM motif) 2 [Source:RGD Symbol;Acc:1311497]	13.6	5.78	-1.24	0.0468	0.852246	yes	DOWN	N	N	N	Y	Y	14.07	5.61
TBIG024288	ENSRNOG00000034026.L01	Lclat1	lysocardiolipin acyltransferase 1 [Source:RGD Symbol;Acc:1565906]	8.27	3.02	-1.45	0.04685	0.852246	yes	DOWN	N	N	N	Y	Y	8.53	2.93
TBIG026702	ENSRNOG00000043390.L01	Samd12	sterile alpha motif domain containing 12 [Source:RGD Symbol;Acc:1561402]	4.79	0.645	-2.89	0.047	0.852702	yes	DOWN	N	N	N	Y	Y	4.94	0.63
TBIG019136	ENSRNOG00000012190.L02	Cldn2	claudin 2 [Source:RGD Symbol;Acc:1560247]	16.2	2.82	-2.52	0.0471	0.853157	yes	DOWN	N	N	N	Y	Y	16.72	2.74
TBIG006055	ENSRNOG00000036682.L01	Pycr1	pyrroline-5-carboxylate reductase 1 [Source:RGD Symbol;Acc:1307863]	13.7	4.5	-1.6	0.04715	0.853157	yes	DOWN	N	N	N	Y	Y	14.11	4.37
TBIG004001	XLOC_004001	-	-	0.81	0.256	-1.66	0.04725	0.854212	yes	DOWN	N	N	N	Y	Y	0.84	0.25
TBIG022708	ENSRNOG00000014259.L01	Mycl	v-myc avian myelocytomatosis viral oncogene lung carcinoma derived homolog [Source:RGD Symbol;Acc:1588591]	9.57	3.83	-1.32	0.0473	0.854361	yes	DOWN	N	N	N	Y	Y	9.87	3.72
TBIG009437	ENSRNOG00000042714.L01	RGD1559459	similar to Expressed sequence AI788959 [Source:RGD Symbol;Acc:1559459]	3.79	0.904	-2.07	0.04785	0.859747	yes	DOWN	N	N	N	Y	Y	3.91	0.88
TBIG015279	ENSRNOG00000011238.L01	Tiparp	TCDD-inducible poly(ADP-ribose) polymerase [Source:RGD Symbol;Acc:1306171]	12.9	5.82	-1.14	0.0479	0.859891	yes	DOWN	N	N	N	Y	Y	13.25	5.65
TBIG025022	ENSRNOG00000033973.L01	Ccdc177	coiled-coil domain containing 177 [Source:RGD Symbol;Acc:1561115]	2.63	0.868	-1.6	0.0481	0.861971	yes	DOWN	N	N	N	Y	Y	2.72	0.84
TBIG027952	ENSRNOG00000009613.L01	Sh3bgrl2	SH3 domain binding glutamate-rich protein like 2 [Source:RGD Symbol;Acc:1591931]	29.3	13.3	-1.14	0.04825	0.863148	yes	DOWN	N	N	N	Y	Y	30.19	12.88
TBIG001436	ENSRNOG00000012036.L01	Pcsk5	proprotein convertase subtilisin/kexin type 5 [Source:RGD Symbol;Acc:620326]	1.76	0.468	-1.91	0.04875	0.865504	yes	DOWN	N	N	N	Y	Y	1.82	0.45
TBIG009616	XLOC_009616	-	-	4.66	1.2	-1.96	0.0489	0.865504	yes	DOWN	N	N	N	Y	Y	4.8	1.16
TBIG013526	ENSRNOG00000021381.L01	Ccdc68	coiled-coil domain containing 68 [Source:RGD Symbol;Acc:1561424]	3.8	0.8	-2.25	0.04895	0.865504	yes	DOWN	N	N	N	Y	Y	3.92	0.78
TBIG022742	ENSRNOG00000011332.L01	Clspn	claspin [Source:RGD Symbol;Acc:1309083]	0.654	0.0899	-2.86	0.04905	0.865504	yes	DOWN	N	N	N	Y	Y	0.67	0.09
TBIG001331	ENSRNOG00000021203.L01	Atl3	atlastin GTPase 3 [Source:RGD Symbol;Acc:1309871]	21.9	9.58	-1.19	0.0491	0.865504	yes	DOWN	N	N	N	Y	Y	22.59	9.3
TBIG024429	XLOC_024429	ARHGAP5	Rho GTPase-activating protein 5 [Source:SWISS;Acc:Q13017]	9.84	3.62	-1.44	0.04945	0.866588	yes	DOWN	N	N	N	Y	Y	10.14	3.52
TBIG009438	ENSRNOG00000022255.L01	Tmprss11e	transmembrane protease, serine 11e [Source:RGD Symbol;Acc:1561698]	1.11	0.246	-2.18	0.0496	0.867598	yes	DOWN	N	N	N	Y	Y	1.15	0.24
TBIG004296	ENSRNOG00000005336	Prss27	protease, serine 27 [Source:RGD Symbol;Acc:1303256]	12.3	3.77	-1.7	0.04965	0.867731	yes	DOWN	N	N	N	Y	Y	12.67	3.66
TBIG002354	ENSRNOG00000015086.L01	Plin1	perilipin 1 [Source:RGD Symbol;Acc:3351]	0	0.954	inf	5e-05	0.0853458	yes	UP	N	Y	Y	Y	Y	0	0.93
TBIG003928	XLOC_003928	-	-	0	71.3	inf	5e-05	0.0853458	yes	UP	N	Y	Y	Y	Y	0	69.19
TBIG009896	ENSRNOG00000048890	LOC257642	rRNA promoter binding protein [Source:RGD Symbol;Acc:727924]	25.8	892	5.11	5e-05	0.0853458	yes	UP	N	Y	Y	Y	Y	26.67	865.55
[truncated: 719 more rows]

## Sheet: DEG4 Y5-8 vs O5-8
GeneId	GeneAcc	GeneName	Desc	Value_1	Value_2	log2fc	p-value	q-value	DEG:PV=0.05:SELECT	DEG:UP_DOWN	DEG:QV<=0.05	DEG:QV<=0.10	DEG:PV<=0.01	DEG:PV<=0.05	DEG:FC2>=0	EXP:Y5-8:FPKM	EXP:O5-8:FPKM
[truncated: 971 more rows]

[truncated: 1 more sheets: DEG5 Y1-4&Y5-8 vs O1-4&O5-8]
