# Supplementary material for: Increased calcium channel in the lamina propria of aging rat
Source: Aging (Albany NY). 2019 Oct 31;11(20):8810–24. doi: 10.18632/aging.102284 (PMC6834399; doi:10.18632/aging.102284)
Supplement: Supplementary data for Table 2 [file aging-11-102284-s003.xlsx]

## Sheet: DEG1 Y1-4 vs O1-4
GeneAcc	EntrezGeneID	GeneName	Desc	Value_1	Value_2	log2fc	p-value	q-value	DEG:PV=0.05:SELECT	DEG:UP_DOWN	DEG:QV<=0.05	DEG:QV<=0.10	DEG:PV<=0.01	DEG:PV<=0.05	DEG:FC2>=0	EXP:Y1-4:FPKM	EXP:O1-4:FPKM
ENSRNOG00000020380.L01	29518	Lgals7	lectin, galactoside-binding, soluble, 7 [Source:RGD Symbol;Acc:61951]	588	66.7	-3.14	5e-05	0.0726033	yes	DOWN	N	Y	Y	Y	Y	635.49	62.06
ENSRNOG00000016853.L01	291755	Dsg1	desmoglein 1 [Source:RGD Symbol;Acc:1309925]	25.1	0.978	-4.68	5e-05	0.0726033	yes	DOWN	N	Y	Y	Y	Y	27.08	0.91
ENSRNOG00000018679.L01	295190	Rptn	repetin [Source:RGD Symbol;Acc:1311687]	1.13	0	#NAME?	5e-05	0.0726033	yes	DOWN	N	Y	Y	Y	Y	1.22	0
ENSRNOG00000011823	301285	Tfap2b	transcription factor AP-2 beta [Source:RGD Symbol;Acc:1306321]	0.602	0	#NAME?	5e-05	0.0726033	yes	DOWN	N	Y	Y	Y	Y	0.65	0
ENSRNOG00000039668.L01	304021	Col8a1	collagen, type VIII, alpha 1 [Source:RGD Symbol;Acc:1309361]	33.3	2.5	-3.74	5e-05	0.0726033	yes	DOWN	N	Y	Y	Y	Y	36.02	2.33
ENSRNOG00000017159.L01	307563	Dsc3	desmocollin 3 [Source:RGD Symbol;Acc:1311782]	26.1	3	-3.12	5e-05	0.0726033	yes	DOWN	N	Y	Y	Y	Y	28.21	2.79
ENSRNOG00000022964	363627	Rnf222	ring finger protein 222 [Source:RGD Symbol;Acc:1310573]	1.45	0	#NAME?	5e-05	0.0726033	yes	DOWN	N	Y	Y	Y	Y	1.57	0
ENSRNOG00000004476.L01	114557	Wif1	Wnt inhibitory factor 1 [Source:RGD Symbol;Acc:619774]	120	4.24	-4.82	0.0001	0.121006	yes	DOWN	N	N	Y	Y	Y	129.81	3.95
ENSRNOG00000029964.L01	289546	Tmprss11g	transmembrane protease, serine 11G [Source:RGD Symbol;Acc:1306446]	63.2	8.9	-2.83	0.00015	0.136131	yes	DOWN	N	N	Y	Y	Y	68.17	8.29
ENSRNOG00000043342	290595	LOC290595	hypothetical gene supported by AF152002 [Source:RGD Symbol;Acc:1566160]	169	17.7	-3.26	0.00015	0.136131	yes	DOWN	N	N	Y	Y	Y	182.1	16.42
ENSRNOG00000012238.L01	365009	Clec3a	C-type lectin domain family 3, member A [Source:RGD Symbol;Acc:1306295]	33.7	3.59	-3.23	0.00015	0.136131	yes	DOWN	N	N	Y	Y	Y	36.39	3.34
ENSRNOG00000028636.L01	497083	Xkr5	XK, Kell blood group complex subunit-related family, member 5 [Source:RGD Symbol;Acc:1359335]	2.75	0	#NAME?	0.0002	0.155579	yes	DOWN	N	N	Y	Y	Y	2.98	0
ENSRNOG00000016632.L01	291752	Dsg3	desmoglein 3 [Source:RGD Symbol;Acc:1592103]	62.7	7.59	-3.05	0.00035	0.245915	yes	DOWN	N	N	Y	Y	Y	67.7	7.07
ENSRNOG00000025994.L01	315318	Krt80	keratin 80 [Source:RGD Symbol;Acc:1359177]	105	14	-2.91	0.0004	0.258627	yes	DOWN	N	N	Y	Y	Y	113.47	13.02
ENSRNOG00000024909	315324	Krt78	keratin 78 [Source:RGD Symbol;Acc:1591341]	22.5	1.19	-4.24	0.0005	0.258627	yes	DOWN	N	N	Y	Y	Y	24.33	1.11
ENSRNOG00000012471	29220	Thbs4	thrombospondin 4 [Source:RGD Symbol;Acc:62046]	36.6	5.51	-2.73	0.00055	0.258627	yes	DOWN	N	N	Y	Y	Y	39.57	5.13
ENSRNOG00000029427.L01	298555	Grhl3	grainyhead-like 3 (Drosophila) [Source:RGD Symbol;Acc:1308320]	25.4	3.74	-2.76	0.00055	0.258627	yes	DOWN	N	N	Y	Y	Y	27.42	3.48
ENSRNOG00000002460.L01	60325	Serpinb2	serpin peptidase inhibitor, clade B (ovalbumin), member 2 [Source:RGD Symbol;Acc:621823]	68.7	11.1	-2.63	0.0006	0.258627	yes	DOWN	N	N	Y	Y	Y	74.13	10.35
ENSRNOG00000002640.L01	116589	Serpinb5	serpin peptidase inhibitor, clade B (ovalbumin), member 5 [Source:RGD Symbol;Acc:69342]	67.5	10.8	-2.64	0.00075	0.258627	yes	DOWN	N	N	Y	Y	Y	72.83	10.11
ENSRNOG00000026244.L01	292755	Nccrp1	non-specific cytotoxic cell receptor protein 1 homolog (zebrafish) [Source:RGD Symbol;Acc:1305932]	60.5	1.83	-5.05	0.00075	0.258627	yes	DOWN	N	N	Y	Y	Y	65.43	1.7
ENSRNOG00000007183	100911252	LOC100360977	TRIMCyp-like [Source:RGD Symbol;Acc:2321083]	147	26.2	-2.49	0.00085	0.258627	yes	DOWN	N	N	Y	Y	Y	159.13	24.38
ENSRNOG00000010841.L01	313592	Col8a2	collagen, type VIII, alpha 2 [Source:RGD Symbol;Acc:1305182]	8.46	0.975	-3.12	0.0009	0.258627	yes	DOWN	N	N	Y	Y	Y	9.15	0.91
ENSRNOG00000032404.L01	360243	Top2a	topoisomerase (DNA) II alpha [Source:RGD Symbol;Acc:62048]	12.7	1.29	-3.29	0.0009	0.258627	yes	DOWN	N	N	Y	Y	Y	13.69	1.2
ENSRNOG00000026951.L01	301039	Susd5	sushi domain containing 5 [Source:RGD Symbol;Acc:1561132]	10.2	1.34	-2.92	0.00095	0.258627	yes	DOWN	N	N	Y	Y	Y	11	1.25
ENSRNOG00000004795.L01	302328	Pof1b	premature ovarian failure 1B [Source:RGD Symbol;Acc:1560798]	48.1	7.82	-2.62	0.00095	0.258627	yes	DOWN	N	N	Y	Y	Y	51.94	7.29
ENSRNOG00000032959	171178	Adh7	alcohol dehydrogenase 7 (class IV), mu or sigma polypeptide [Source:RGD Symbol;Acc:621638]	184	31.1	-2.57	0.0011	0.258627	yes	DOWN	N	N	Y	Y	Y	198.77	28.95
ENSRNOG00000013808.L01	291952	Ces2g	carboxylesterase 2G [Source:RGD Symbol;Acc:1308358]	32	5.51	-2.54	0.00115	0.258627	yes	DOWN	N	N	Y	Y	Y	34.59	5.13
ENSRNOG00000012176.L01	84590	Rab27b	RAB27B, member RAS oncogene family [Source:RGD Symbol;Acc:620114]	18.1	3.33	-2.44	0.0014	0.258627	yes	DOWN	N	N	Y	Y	Y	19.5	3.1
ENSRNOG00000021798.L01	310611	LOC100910179	peptidoglycan recognition protein 4-like [Source:RGD Symbol;Acc:6499827]	1	0	#NAME?	0.0015	0.258627	yes	DOWN	N	N	Y	Y	Y	1.08	0
ENSRNOG00000030676.L01	502412	RGD1562885	similar to RIKEN cDNA 2300002M23 [Source:RGD Symbol;Acc:1562885]	53.5	9.42	-2.5	0.0016	0.258627	yes	DOWN	N	N	Y	Y	Y	57.81	8.77
ENSRNOG00000017140.L01	689949	Zfp185	zinc finger protein 185 [Source:RGD Symbol;Acc:1586351]	26.5	5.75	-2.21	0.0016	0.258627	yes	DOWN	N	N	Y	Y	Y	28.66	5.36
ENSRNOG00000039969.L01	291760	Dsc2	desmocollin 2 [Source:RGD Symbol;Acc:1309426]	81.5	14.4	-2.5	0.0018	0.258627	yes	DOWN	N	N	Y	Y	Y	88.04	13.42
ENSRNOG00000017933.L02	498795	Ccdc3	coiled-coil domain containing 3 [Source:RGD Symbol;Acc:1559473]	25.3	2.98	-3.08	0.0018	0.258627	yes	DOWN	N	N	Y	Y	Y	27.3	2.78
ENSRNOG00000002414.L01	304741	Tfcp2l1	transcription factor CP2-like 1 [Source:RGD Symbol;Acc:1305456]	10.5	2.2	-2.26	0.0019	0.258627	yes	DOWN	N	N	Y	Y	Y	11.36	2.04
ENSRNOG00000036877.L01	499721	Clca4l	chloride channel calcium activated 4-like [Source:RGD Symbol;Acc:1591945]	28.7	0.677	-5.4	0.0021	0.258627	yes	DOWN	N	N	Y	Y	Y	30.98	0.63
ENSRNOG00000019184.L01	25339	Npr3	natriuretic peptide receptor 3 [Source:RGD Symbol;Acc:3196]	12.8	2.36	-2.44	0.0022	0.258627	yes	DOWN	N	N	Y	Y	Y	13.81	2.2
ENSRNOG00000032002.L01	29331	Hapln1	hyaluronan and proteoglycan link protein 1 [Source:RGD Symbol;Acc:2412]	8.73	0.987	-3.14	0.0022	0.258627	yes	DOWN	N	N	Y	Y	Y	9.42	0.92
ENSRNOG00000008816.L01	113955	Gpnmb	glycoprotein (transmembrane) nmb [Source:RGD Symbol;Acc:71008]	47.9	10.5	-2.19	0.0022	0.258627	yes	DOWN	N	N	Y	Y	Y	51.79	9.74
ENSRNOG00000023316.L01	313993	Grhl1	grainyhead-like 1 (Drosophila) [Source:RGD Symbol;Acc:1305735]	34.9	6.88	-2.34	0.00225	0.258627	yes	DOWN	N	N	Y	Y	Y	37.75	6.4
ENSRNOG00000000323.L01	309871	Prdm1	PR domain containing 1, with ZNF domain [Source:RGD Symbol;Acc:1311765]	5.56	0.658	-3.08	0.00235	0.258627	yes	DOWN	N	N	Y	Y	Y	6.01	0.61
ENSRNOG00000011925.L01	315829	Fam83b	family with sequence similarity 83, member B [Source:RGD Symbol;Acc:1311988]	8.72	1.77	-2.3	0.0024	0.258627	yes	DOWN	N	N	Y	Y	Y	9.42	1.65
ENSRNOG00000024689.L01	171160	Hopx	HOP homeobox [Source:RGD Symbol;Acc:621841]	368	75.5	-2.29	0.00265	0.258627	yes	DOWN	N	N	Y	Y	Y	397.75	70.28
ENSRNOG00000025332.L01	363104	Cd109	CD109 molecule [Source:RGD Symbol;Acc:1311287]	11.7	1.54	-2.93	0.0027	0.258627	yes	DOWN	N	N	Y	Y	Y	12.62	1.43
ENSRNOG00000028576.L01	364774	Calml5	calmodulin-like 5 [Source:RGD Symbol;Acc:1310047]	291	34	-3.1	0.0029	0.258627	yes	DOWN	N	N	Y	Y	Y	314.38	31.61
ENSRNOG00000021134.L01	689830	Anxa9	annexin A9 [Source:RGD Symbol;Acc:1587550]	25.1	2.69	-3.22	0.00315	0.258627	yes	DOWN	N	N	Y	Y	Y	27.14	2.51
ENSRNOG00000023828.L01	680875	LOC680875	similar to dystonin isoform 1 [Source:RGD Symbol;Acc:1587008]	52.2	7	-2.9	0.0032	0.258627	yes	DOWN	N	N	Y	Y	Y	56.45	6.51
ENSRNOG00000005336	287108	Prss27	protease, serine 27 [Source:RGD Symbol;Acc:1303256]	33	3.94	-3.07	0.00325	0.258627	yes	DOWN	N	N	Y	Y	Y	35.62	3.66
ENSRNOG00000019999.L01	60378	Lypd3	Ly6/Plaur domain containing 3 [Source:RGD Symbol;Acc:69053]	139	31.1	-2.16	0.00335	0.258627	yes	DOWN	N	N	Y	Y	Y	150.38	28.93
ENSRNOG00000020382.L01	100912863	Ltb4r2	leukotriene B4 receptor 2 [Source:RGD Symbol;Acc:621029]	7.56	0.692	-3.45	0.00335	0.258627	yes	DOWN	N	N	Y	Y	Y	8.19	0.64
ENSRNOG00000009399.L01	295714	RGD1311224	similar to fatty acid desaturase 2; linoleoyl-CoA desaturase (delta-6-desaturase)-like 2; delta-6 fatty acid desaturase [Source:RGD Symbol;Acc:1311224]	33.7	5.59	-2.59	0.00345	0.258627	yes	DOWN	N	N	Y	Y	Y	36.4	5.2
ENSRNOG00000025603.L01	301269	Gpr111	G protein-coupled receptor 111 [Source:RGD Symbol;Acc:1306718]	5.31	0.463	-3.52	0.0035	0.258627	yes	DOWN	N	N	Y	Y	Y	5.74	0.43
ENSRNOG00000050251	302884	MGC105649	hypothetical LOC302884 [Source:RGD Symbol;Acc:1359583]	70.6	15.5	-2.19	0.0035	0.258627	yes	DOWN	N	N	Y	Y	Y	76.25	14.45
ENSRNOG00000021902.L01	497856	Rmi2	RecQ mediated genome instability 2 [Source:RGD Symbol;Acc:1563163]	0.877	0	#NAME?	0.00355	0.258627	yes	DOWN	N	N	Y	Y	Y	0.95	0
ENSRNOG00000004527	100911013	Lin7a	lin-7 homolog a (C. elegans) [Source:RGD Symbol;Acc:621256]	1.37	0	#NAME?	0.0038	0.258627	yes	DOWN	N	N	Y	Y	Y	1.48	0
ENSRNOG00000033933	288075	Stfa3	stefin A3 [Source:RGD Symbol;Acc:1307831]	102	9.46	-3.44	0.00395	0.258627	yes	DOWN	N	N	Y	Y	Y	110.66	8.8
ENSRNOG00000017024	298581	Pla2g2e	phospholipase A2, group IIE [Source:RGD Symbol;Acc:1309611]	1.13	0	#NAME?	0.0042	0.258627	yes	DOWN	N	N	Y	Y	Y	1.22	0
ENSRNOG00000013203	312273	LOC312273	Trypsin V-A [Source:RGD Symbol;Acc:1563848]	1.48	0	#NAME?	0.0042	0.258627	yes	DOWN	N	N	Y	Y	Y	1.6	0
ENSRNOG00000015321	294119	Moxd1	monooxygenase, DBH-like 1 [Source:RGD Symbol;Acc:1310033]	9.94	1.43	-2.8	0.00445	0.258627	yes	DOWN	N	N	Y	Y	Y	10.74	1.33
ENSRNOG00000010516.L01	25619	Plau	plasminogen activator, urokinase [Source:RGD Symbol;Acc:3343]	60.1	12.8	-2.23	0.0045	0.258627	yes	DOWN	N	N	Y	Y	Y	64.97	11.94
ENSRNOG00000021771.L01	300656	Trim29	tripartite motif-containing 29 [Source:RGD Symbol;Acc:1307858]	91	21.1	-2.11	0.0045	0.258627	yes	DOWN	N	N	Y	Y	Y	98.34	19.64
ENSRNOG00000009531.L01	362285	Col9a3	collagen, type IX, alpha 3 [Source:RGD Symbol;Acc:1310255]	24.3	5.07	-2.26	0.0046	0.258627	yes	DOWN	N	N	Y	Y	Y	26.26	4.71
ENSRNOG00000016397.L01	300682	Tmprss13	transmembrane protease, serine 13 [Source:RGD Symbol;Acc:1310872]	19	3.25	-2.54	0.00475	0.258627	yes	DOWN	N	N	Y	Y	Y	20.49	3.03
ENSRNOG00000009945.L01	315926	Pls1	plastin 1 [Source:RGD Symbol;Acc:1307142]	21.6	5.31	-2.02	0.0048	0.258627	yes	DOWN	N	N	Y	Y	Y	23.28	4.95
ENSRNOG00000009339.L01	362044	Cenpe	centromere protein E [Source:RGD Symbol;Acc:1307115]	2.23	0.209	-3.42	0.0049	0.258627	yes	DOWN	N	N	Y	Y	Y	2.41	0.19
ENSRNOG00000014080.L01	315740	Kif23	kinesin family member 23 [Source:RGD Symbol;Acc:1308596]	20.7	4.39	-2.24	0.005	0.258627	yes	DOWN	N	N	Y	Y	Y	22.37	4.09
ENSRNOG00000010866.L01	361972	Tmem154	transmembrane protein 154 [Source:RGD Symbol;Acc:1563262]	26.8	5.78	-2.21	0.00505	0.258627	yes	DOWN	N	N	Y	Y	Y	28.92	5.39
ENSRNOG00000003183	64507	Fmod	fibromodulin [Source:RGD Symbol;Acc:619769]	23.8	4.66	-2.35	0.0052	0.258627	yes	DOWN	N	N	Y	Y	Y	25.71	4.33
ENSRNOG00000012094.L01	59106	Ltbp2	latent transforming growth factor beta binding protein 2 [Source:RGD Symbol;Acc:68380]	10.1	2.02	-2.31	0.00525	0.258627	yes	DOWN	N	N	Y	Y	Y	10.88	1.88
ENSRNOG00000015075.L01	81801	Stc1	stanniocalcin 1 [Source:RGD Symbol;Acc:621776]	5.83	0.869	-2.75	0.00525	0.258627	yes	DOWN	N	N	Y	Y	Y	6.3	0.81
ENSRNOG00000027430.L01	301476	Ikzf2	IKAROS family zinc finger 2 [Source:RGD Symbol;Acc:1308686]	30.3	7.26	-2.06	0.0054	0.258627	yes	DOWN	N	N	Y	Y	Y	32.76	6.77
ENSRNOG00000002417.L01	266775	Serpinb10	serpin peptidase inhibitor, clade B (ovalbumin), member 10 [Source:RGD Symbol;Acc:628853]	89	21.1	-2.08	0.00555	0.258627	yes	DOWN	N	N	Y	Y	Y	96.08	19.65
ENSRNOG00000022684	25236	Gpc3	glypican 3 [Source:RGD Symbol;Acc:2725]	92.4	21.9	-2.08	0.0056	0.258627	yes	DOWN	N	N	Y	Y	Y	99.79	20.36
ENSRNOG00000001514	311742	Cdca7	cell division cycle associated 7 [Source:RGD Symbol;Acc:1309363]	31.3	7.59	-2.04	0.00575	0.258627	yes	DOWN	N	N	Y	Y	Y	33.84	7.07
ENSRNOG00000017156.L01	361122	Ankle1	ankyrin repeat and LEM domain containing 1 [Source:RGD Symbol;Acc:1308184]	4.92	0.67	-2.88	0.0066	0.258627	yes	DOWN	N	N	Y	Y	Y	5.32	0.62
ENSRNOG00000012535	501106	Gpr115	G protein-coupled receptor 115 [Source:RGD Symbol;Acc:1565216]	14.6	1.15	-3.67	0.00665	0.258627	yes	DOWN	N	N	Y	Y	Y	15.73	1.07
ENSRNOG00000010555.L01	290356	LOC102551958	phytanoyl-CoA hydroxylase-interacting protein-like [Source:RGD Symbol;Acc:7719585]	36.7	9.53	-1.95	0.00675	0.258627	yes	DOWN	N	N	Y	Y	Y	39.69	8.87
ENSRNOG00000013057.L01	308761	Prc1	protein regulator of cytokinesis 1 [Source:RGD Symbol;Acc:1311754]	15.6	2.11	-2.89	0.00675	0.258627	yes	DOWN	N	N	Y	Y	Y	16.84	1.96
ENSRNOG00000008885.L01	314694	Chst11	carbohydrate (chondroitin 4) sulfotransferase 11 [Source:RGD Symbol;Acc:1308400]	6.03	1.18	-2.35	0.00675	0.258627	yes	DOWN	N	N	Y	Y	Y	6.52	1.1
ENSRNOG00000026371	287702	Krt17	keratin 17 [Source:RGD Symbol;Acc:1303181]	238	57.6	-2.05	0.00695	0.258627	yes	DOWN	N	N	Y	Y	Y	257.21	53.53
ENSRNOG00000021274.L01	296179	Fermt1	fermitin family member 1 [Source:RGD Symbol;Acc:1306816]	13	3.29	-1.98	0.007	0.258627	yes	DOWN	N	N	Y	Y	Y	14.08	3.07
ENSRNOG00000018276.L01	499166	Mgat4a	mannosyl (alpha-1,3-)-glycoprotein beta-1,4-N-acetylglucosaminyltransferase, isozyme A [Source:RGD Symbol;Acc:1305650]	22.2	5.59	-1.99	0.007	0.258627	yes	DOWN	N	N	Y	Y	Y	23.97	5.21
ENSRNOG00000048953.L01	100911797	Spink5	serine peptidase inhibitor, Kazal type 5 [Source:RGD Symbol;Acc:1306540]	5.37	0.7	-2.94	0.0072	0.258627	yes	DOWN	N	N	Y	Y	Y	5.79	0.65
ENSRNOG00000018459.L01	64133	Xylt1	xylosyltransferase 1 [Source:RGD Symbol;Acc:620093]	4.47	1.05	-2.08	0.00745	0.261302	yes	DOWN	N	N	Y	Y	Y	4.83	0.98
ENSRNOG00000013481	84407	Cdh11	cadherin 11 [Source:RGD Symbol;Acc:619742]	11.5	2.86	-2.01	0.00745	0.261302	yes	DOWN	N	N	Y	Y	Y	12.44	2.66
ENSRNOG00000017775.L01	25552	Slc5a1	solute carrier family 5 (sodium/glucose cotransporter), member 1 [Source:RGD Symbol;Acc:3713]	5.53	0.617	-3.16	0.00755	0.263536	yes	DOWN	N	N	Y	Y	Y	5.97	0.57
ENSRNOG00000013932.L01	24710	Rbp2	retinol binding protein 2, cellular [Source:RGD Symbol;Acc:3544]	33.5	4.28	-2.97	0.0077	0.267486	yes	DOWN	N	N	Y	Y	Y	36.21	3.98
ENSRNOG00000024237.L01	361086	Scel	sciellin [Source:RGD Symbol;Acc:1305102]	66.2	16.5	-2.01	0.0081	0.274807	yes	DOWN	N	N	Y	Y	Y	71.52	15.35
ENSRNOG00000008161.L01	81916	Pdzk1ip1	PDZK1 interacting protein 1 [Source:RGD Symbol;Acc:620952]	80.8	18.5	-2.13	0.00815	0.276073	yes	DOWN	N	N	Y	Y	Y	87.28	17.17
ENSRNOG00000026844.L01	691259	Lypd8	LY6/PLAUR domain containing 8 [Source:RGD Symbol;Acc:1586251]	35.1	0.647	-5.76	0.0085	0.285708	yes	DOWN	N	N	Y	Y	Y	37.86	0.6
ENSRNOG00000010076.L01	304822	Pkp1	plakophilin 1 [Source:RGD Symbol;Acc:1307472]	139	28.1	-2.31	0.00895	0.298988	yes	DOWN	N	N	Y	Y	Y	150.34	26.18
ENSRNOG00000001923.L01	360731	Tprg1	tumor protein p63 regulated 1 [Source:RGD Symbol;Acc:1306226]	11.9	0.644	-4.21	0.0093	0.307847	yes	DOWN	N	N	Y	Y	Y	12.83	0.6
ENSRNOG00000002331	25375	Aldh3a1	aldehyde dehydrogenase 3 family, member A1 [Source:RGD Symbol;Acc:2088]	224	58.7	-1.94	0.00935	0.309032	yes	DOWN	N	N	Y	Y	Y	242.62	54.56
ENSRNOG00000012318.L01	289054	Aspm	asp (abnormal spindle) homolog, microcephaly associated (Drosophila) [Source:RGD Symbol;Acc:1307111]	4.85	1.06	-2.19	0.00945	0.310922	yes	DOWN	N	N	Y	Y	Y	5.24	0.99
ENSRNOG00000013823.L01	499174	Cers3	ceramide synthase 3 [Source:RGD Symbol;Acc:1564356]	6.48	0.752	-3.11	0.00945	0.310922	yes	DOWN	N	N	Y	Y	Y	7	0.7
ENSRNOG00000003120.L01	84400	Prelp	proline/arginine-rich end leucine-rich repeat protein [Source:RGD Symbol;Acc:620226]	37.7	10.1	-1.9	0.00965	0.314651	yes	DOWN	N	N	Y	Y	Y	40.74	9.4
ENSRNOG00000022710.L01	499847	Prrg4	proline rich Gla (G-carboxyglutamic acid) 4 (transmembrane) [Source:RGD Symbol;Acc:1560542]	17.8	4.8	-1.89	0.0102	0.331591	yes	DOWN	N	N	N	Y	Y	19.28	4.48
ENSRNOG00000019939.L01	64033	Ccnd2	cyclin D2 [Source:RGD Symbol;Acc:621083]	130	26.8	-2.28	0.01065	0.344166	yes	DOWN	N	N	N	Y	Y	140.49	24.96
ENSRNOG00000003705.L01	367786	Bmx	BMX non-receptor tyrosine kinase [Source:RGD Symbol;Acc:1565643]	50.1	10.7	-2.23	0.01075	0.346369	yes	DOWN	N	N	N	Y	Y	54.13	9.95
ENSRNOG00000027592.L01	502916	Rerg	RAS-like, estrogen-regulated, growth-inhibitor [Source:RGD Symbol;Acc:1562829]	27.6	7.28	-1.92	0.01075	0.346369	yes	DOWN	N	N	N	Y	Y	29.82	6.78
ENSRNOG00000009797	65133	Aqp3	aquaporin 3 [Source:RGD Symbol;Acc:68428]	713	124	-2.53	0.01085	0.349075	yes	DOWN	N	N	N	Y	Y	770.67	114.91
ENSRNOG00000049585.L01	116640	Tnc	tenascin C [Source:RGD Symbol;Acc:621057]	9.17	1.06	-3.11	0.01125	0.360878	yes	DOWN	N	N	N	Y	Y	9.9	0.99
ENSRNOG00000017550.L01	296145	Fbln7	fibulin 7 [Source:RGD Symbol;Acc:1310131]	6.25	1.24	-2.34	0.01165	0.370436	yes	DOWN	N	N	N	Y	Y	6.75	1.15
ENSRNOG00000004332.L01	24329	Egfr	epidermal growth factor receptor [Source:RGD Symbol;Acc:2543]	12.9	3.77	-1.77	0.01175	0.372528	yes	DOWN	N	N	N	Y	Y	13.89	3.51
ENSRNOG00000003304	29195	Chad	chondroadherin [Source:RGD Symbol;Acc:2336]	139	13.3	-3.39	0.0119	0.376189	yes	DOWN	N	N	N	Y	Y	149.76	12.33
ENSRNOG00000022353.L01	292848	Klk13	kallikrein related-peptidase 13 [Source:RGD Symbol;Acc:1309337]	21.2	1.58	-3.75	0.01205	0.380378	yes	DOWN	N	N	N	Y	Y	22.92	1.47
ENSRNOG00000049075	140868	Fabp5	fatty acid binding protein 5, epidermal [Source:RGD Symbol;Acc:70997]	267	78	-1.77	0.0124	0.386387	yes	DOWN	N	N	N	Y	Y	288.05	72.52
ENSRNOG00000013028.L01	266603	Aldh1a3	aldehyde dehydrogenase 1 family, member A3 [Source:RGD Symbol;Acc:628662]	17.7	4.77	-1.89	0.01245	0.387391	yes	DOWN	N	N	N	Y	Y	19.14	4.44
ENSRNOG00000010917.L01	315824	Bmp5	bone morphogenetic protein 5 [Source:RGD Symbol;Acc:1305979]	7.2	1.24	-2.54	0.0125	0.388392	yes	DOWN	N	N	N	Y	Y	7.78	1.16
ENSRNOG00000006403.L01	192183	Pvrl1	poliovirus receptor-related 1 [Source:RGD Symbol;Acc:620791]	38.8	10.9	-1.84	0.0127	0.393483	yes	DOWN	N	N	N	Y	Y	41.92	10.09
ENSRNOG00000043219.L01	689008	Fbn2	fibrillin 2 [Source:RGD Symbol;Acc:620910]	2.47	0.293	-3.08	0.0129	0.397981	yes	DOWN	N	N	N	Y	Y	2.67	0.27
ENSRNOG00000015076.L01	312495	Cyp26b1	cytochrome P450, family 26, subfamily b, polypeptide 1 [Source:RGD Symbol;Acc:631379]	8.38	1.57	-2.42	0.01325	0.405905	yes	DOWN	N	N	N	Y	Y	9.06	1.46
ENSRNOG00000003614.L01	65271	Mgat5	mannosyl (alpha-1,6-)-glycoprotein beta-1,6-N-acetyl-glucosaminyltransferase [Source:RGD Symbol;Acc:620100]	12	2.95	-2.02	0.01335	0.40725	yes	DOWN	N	N	N	Y	Y	12.93	2.74
ENSRNOG00000017882.L01	307124	Camk1d	calcium/calmodulin-dependent protein kinase ID [Source:RGD Symbol;Acc:1560691]	10.7	3.1	-1.78	0.01335	0.40725	yes	DOWN	N	N	N	Y	Y	11.55	2.89
ENSRNOG00000038572.L01	305392	Ncapg	non-SMC condensin I complex, subunit G [Source:RGD Symbol;Acc:1562646]	2.91	0.39	-2.9	0.0135	0.410103	yes	DOWN	N	N	N	Y	Y	3.14	0.36
ENSRNOG00000012671.L01	307893	Gan	gigaxonin [Source:RGD Symbol;Acc:1307766]	7.44	2.29	-1.7	0.01385	0.417821	yes	DOWN	N	N	N	Y	Y	8.03	2.13
ENSRNOG00000016343.L01	171548	Dkk3	dickkopf WNT signaling pathway inhibitor 3 [Source:RGD Symbol;Acc:621846]	27.3	7.48	-1.87	0.0142	0.42602	yes	DOWN	N	N	N	Y	Y	29.48	6.97
ENSRNOG00000005715.L01	286994	Lgr4	leucine-rich repeat-containing G protein-coupled receptor 4 [Source:RGD Symbol;Acc:628615]	60	16.6	-1.85	0.01435	0.429337	yes	DOWN	N	N	N	Y	Y	64.78	15.49
ENSRNOG00000028992.L01	58968	Acan	aggrecan [Source:RGD Symbol;Acc:68358]	10.4	3.14	-1.72	0.0144	0.430242	yes	DOWN	N	N	N	Y	Y	11.2	2.92
ENSRNOG00000007906.L01	171576	Bub1b	BUB1 mitotic checkpoint serine/threonine kinase B [Source:RGD Symbol;Acc:619791]	5.34	0.478	-3.48	0.0146	0.43562	yes	DOWN	N	N	N	Y	Y	5.77	0.45
ENSRNOG00000018778.L01	363058	Cadm1	cell adhesion molecule 1 [Source:RGD Symbol;Acc:1310999]	8.74	1.82	-2.26	0.0147	0.438004	yes	DOWN	N	N	N	Y	Y	9.44	1.7
ENSRNOG00000043445.L01	361993	Them5	thioesterase superfamily member 5 [Source:RGD Symbol;Acc:1562059]	100	14.7	-2.77	0.01505	0.444782	yes	DOWN	N	N	N	Y	Y	108.22	13.69
ENSRNOG00000005932.L01	313270	Megf9	multiple EGF-like-domains 9 [Source:RGD Symbol;Acc:1308330]	13.1	3.88	-1.75	0.0152	0.44679	yes	DOWN	N	N	N	Y	Y	14.14	3.62
ENSRNOG00000012660.L01	361945	Postn	periostin, osteoblast specific factor [Source:RGD Symbol;Acc:1305285]	31.6	9.4	-1.75	0.0152	0.44679	yes	DOWN	N	N	N	Y	Y	34.17	8.75
ENSRNOG00000026143.L01	680515	Ckap2l	cytoskeleton associated protein 2-like [Source:RGD Symbol;Acc:1590645]	4.89	0.77	-2.67	0.01545	0.452554	yes	DOWN	N	N	N	Y	Y	5.28	0.72
ENSRNOG00000002403.L01	63912	Fam129a	family with sequence similarity 129, member A [Source:RGD Symbol;Acc:71088]	38.9	10.7	-1.87	0.0155	0.452554	yes	DOWN	N	N	N	Y	Y	41.97	9.92
ENSRNOG00000003221.L01	81523	Myoc	myocilin, trabecular meshwork inducible glucocorticoid response [Source:RGD Symbol;Acc:620430]	107	27.1	-1.99	0.0155	0.452554	yes	DOWN	N	N	N	Y	Y	116.15	25.18
ENSRNOG00000020584.L01	170901	Efna3	ephrin A3 [Source:RGD Symbol;Acc:620390]	7.82	1.09	-2.84	0.0155	0.452554	yes	DOWN	N	N	N	Y	Y	8.45	1.02
ENSRNOG00000027894.L01	310621	Iqgap3	IQ motif containing GTPase activating protein 3 [Source:RGD Symbol;Acc:1305951]	3.34	0.661	-2.34	0.01565	0.455104	yes	DOWN	N	N	N	Y	Y	3.61	0.62
ENSRNOG00000007271.L01	500690	Map3k9	mitogen-activated protein kinase kinase kinase 9 [Source:RGD Symbol;Acc:1562149]	7.66	2.27	-1.76	0.01575	0.457401	yes	DOWN	N	N	N	Y	Y	8.28	2.11
ENSRNOG00000022282	25412	Col2a1	collagen, type II, alpha 1 [Source:RGD Symbol;Acc:2375]	11	3.31	-1.74	0.01595	0.460752	yes	DOWN	N	N	N	Y	Y	11.95	3.07
ENSRNOG00000026415.L01	314981	Col14a1	collagen, type XIV, alpha 1 [Source:RGD Symbol;Acc:1305806]	21.3	6.2	-1.78	0.01595	0.460752	yes	DOWN	N	N	N	Y	Y	23.03	5.77
ENSRNOG00000010667.L01	362713	Ept1	ethanolaminephosphotransferase 1 (CDP-ethanolamine-specific) [Source:RGD Symbol;Acc:1560938]	25.2	6.55	-1.94	0.01595	0.460752	yes	DOWN	N	N	N	Y	Y	27.17	6.11
ENSRNOG00000045531	498650	Rab11fip1	RAB11 family interacting protein 1 (class I) [Source:EntrezGene;Acc:498650]	49	13.3	-1.88	0.01615	0.465911	yes	DOWN	N	N	N	Y	Y	52.93	12.37
ENSRNOG00000020136.L01	60335	Tgm1	transglutaminase 1 [Source:RGD Symbol;Acc:61838]	41.5	13.5	-1.62	0.0165	0.4735	yes	DOWN	N	N	N	Y	Y	44.83	12.52
ENSRNOG00000032231.L01	100359562	Mroh6	maestro heat-like repeat family member 6 [Source:RGD Symbol;Acc:2323632]	25.9	7.72	-1.74	0.0165	0.4735	yes	DOWN	N	N	N	Y	Y	27.97	7.18
ENSRNOG00000016122	25675	Hmgcr	3-hydroxy-3-methylglutaryl-CoA reductase [Source:RGD Symbol;Acc:2803]	27.5	8.52	-1.69	0.0167	0.476727	yes	DOWN	N	N	N	Y	Y	29.72	7.93
ENSRNOG00000010106.L01	366333	Faxc	failed axon connections homolog (Drosophila) [Source:RGD Symbol;Acc:1562449]	0.809	0	#NAME?	0.0168	0.478954	yes	DOWN	N	N	N	Y	Y	0.87	0
ENSRNOG00000012286.L01	308716	Il20ra	interleukin 20 receptor, alpha [Source:RGD Symbol;Acc:1307335]	14.2	2.93	-2.27	0.01685	0.479295	yes	DOWN	N	N	N	Y	Y	15.31	2.73
ENSRNOG00000012843.L01	246266	Aspg	asparaginase [Source:RGD Symbol;Acc:708388]	7.33	0.84	-3.12	0.0169	0.479295	yes	DOWN	N	N	N	Y	Y	7.92	0.78
ENSRNOG00000015529.L01	297594	Cdca3	cell division cycle associated 3 [Source:RGD Symbol;Acc:1359093]	9.68	1.42	-2.77	0.0169	0.479295	yes	DOWN	N	N	N	Y	Y	10.46	1.32
ENSRNOG00000008115.L01	296060	Arhgap11a	Rho GTPase activating protein 11A [Source:RGD Symbol;Acc:1309107]	6.33	1.44	-2.13	0.01705	0.482921	yes	DOWN	N	N	N	Y	Y	6.83	1.35
ENSRNOG00000011332.L01	100912530	Clspn	claspin [Source:RGD Symbol;Acc:1309083]	1.09	0.0938	-3.54	0.0171	0.483708	yes	DOWN	N	N	N	Y	Y	1.18	0.09
ENSRNOG00000005345	24877	Vsnl1	visinin-like 1 [Source:RGD Symbol;Acc:3966]	23.3	5.39	-2.11	0.01715	0.483865	yes	DOWN	N	N	N	Y	Y	25.13	5.02
ENSRNOG00000011427.L01	60563	Hr	hair growth associated [Source:RGD Symbol;Acc:620634]	38.7	10.4	-1.9	0.01715	0.483865	yes	DOWN	N	N	N	Y	Y	41.8	9.63
ENSRNOG00000003038.L01	360868	Sft2d2	SFT2 domain containing 2 [Source:RGD Symbol;Acc:1310623]	60.8	15.7	-1.95	0.0172	0.484178	yes	DOWN	N	N	N	Y	Y	65.73	14.66
ENSRNOG00000018635.L01	25203	Ccnb1	cyclin B1 [Source:RGD Symbol;Acc:2291]	12.6	2.16	-2.55	0.01725	0.484178	yes	DOWN	N	N	N	Y	Y	13.62	2.01
ENSRNOG00000000545.L01	25681	Col10a1	collagen, type X, alpha 1 [Source:RGD Symbol;Acc:2371]	18.4	3.16	-2.54	0.01725	0.484178	yes	DOWN	N	N	N	Y	Y	19.88	2.94
ENSRNOG00000003526.L01	140594	Sytl4	synaptotagmin-like 4 [Source:RGD Symbol;Acc:620204]	20.1	6.18	-1.7	0.01725	0.484178	yes	DOWN	N	N	N	Y	Y	21.7	5.75
ENSRNOG00000015727.L01	309380	Loxl4	lysyl oxidase-like 4 [Source:RGD Symbol;Acc:1308588]	11.9	2.94	-2.02	0.0173	0.484957	yes	DOWN	N	N	N	Y	Y	12.91	2.73
ENSRNOG00000009258.L01	114483	Cdk6	cyclin-dependent kinase 6 [Source:RGD Symbol;Acc:621121]	9.56	3.03	-1.66	0.01745	0.48728	yes	DOWN	N	N	N	Y	Y	10.34	2.82
ENSRNOG00000027924.L01	100360307	Fam83g	family with sequence similarity 83, member G [Source:RGD Symbol;Acc:2322345]	8.89	2.34	-1.92	0.01785	0.49654	yes	DOWN	N	N	N	Y	Y	9.61	2.18
ENSRNOG00000022268.L01	362972	Pnpla3	patatin-like phospholipase domain containing 3 [Source:RGD Symbol;Acc:1595843]	10.6	2.7	-1.98	0.018	0.500074	yes	DOWN	N	N	N	Y	Y	11.48	2.51
ENSRNOG00000011160.L01	117556	Sv2b	synaptic vesicle glycoprotein 2b [Source:RGD Symbol;Acc:619716]	3.95	0.361	-3.45	0.0183	0.507115	yes	DOWN	N	N	N	Y	Y	4.27	0.34
ENSRNOG00000025587.L01	25157	Plagl1	pleiomorphic adenoma gene-like 1 [Source:RGD Symbol;Acc:3014]	10.6	3.04	-1.8	0.01835	0.50721	yes	DOWN	N	N	N	Y	Y	11.45	2.83
ENSRNOG00000021203.L01	309187	Atl3	atlastin GTPase 3 [Source:RGD Symbol;Acc:1309871]	33.3	9.98	-1.74	0.01835	0.50721	yes	DOWN	N	N	N	Y	Y	35.91	9.3
ENSRNOG00000025654.L01	301266	Gpr110	G protein-coupled receptor 110 [Source:RGD Symbol;Acc:1310285]	3.62	0.277	-3.71	0.0184	0.507304	yes	DOWN	N	N	N	Y	Y	3.91	0.26
ENSRNOG00000004921.L01	311336	Nusap1	nucleolar and spindle associated protein 1 [Source:RGD Symbol;Acc:1305764]	7.06	1.18	-2.58	0.01865	0.512899	yes	DOWN	N	N	N	Y	Y	7.62	1.1
ENSRNOG00000002273	497009	Naaa	N-acylethanolamine acid amidase [Source:RGD Symbol;Acc:1307267]	34.2	10.2	-1.75	0.0188	0.514426	yes	DOWN	N	N	N	Y	Y	36.95	9.49
ENSRNOG00000007740.L01	494343	Tacstd2	tumor-associated calcium signal transducer 2 [Source:RGD Symbol;Acc:1359498]	186	56.1	-1.73	0.0189	0.516513	yes	DOWN	N	N	N	Y	Y	200.85	52.2
ENSRNOG00000009334	311325	Knstrn	kinetochore-localized astrin/SPAG5 binding protein [Source:RGD Symbol;Acc:1303240]	7.86	0.493	-3.99	0.0196	0.53098	yes	DOWN	N	N	N	Y	Y	8.49	0.46
ENSRNOG00000023272	362720	Rrm2	ribonucleotide reductase M2 [Source:RGD Symbol;Acc:1598310]	11.5	0.741	-3.96	0.0196	0.53098	yes	DOWN	N	N	N	Y	Y	12.45	0.69
ENSRNOG00000001469	25043	Eln	elastin [Source:RGD Symbol;Acc:67394]	123	33.6	-1.87	0.0197	0.533026	yes	DOWN	N	N	N	Y	Y	132.85	31.23
ENSRNOG00000012183.L01	64045	Glrx	glutaredoxin (thioltransferase) [Source:RGD Symbol;Acc:70951]	239	76.8	-1.64	0.02	0.538467	yes	DOWN	N	N	N	Y	Y	257.8	71.51
ENSRNOG00000007030.L01	171287	Epha7	Eph receptor A7 [Source:RGD Symbol;Acc:70957]	9.12	2.81	-1.7	0.02	0.538467	yes	DOWN	N	N	N	Y	Y	9.85	2.62
ENSRNOG00000002227.L01	64030	Kit	v-kit Hardy-Zuckerman 4 feline sarcoma viral oncogene homolog [Source:RGD Symbol;Acc:620568]	16.7	5.47	-1.61	0.0201	0.539825	yes	DOWN	N	N	N	Y	Y	18	5.09
ENSRNOG00000014070.L01	287699	Krt13	keratin 13 [Source:RGD Symbol;Acc:1302937]	894	119	-2.91	0.0201	0.539825	yes	DOWN	N	N	N	Y	Y	965.93	110.71
ENSRNOG00000008336	25341	Tnfrsf11b	tumor necrosis factor receptor superfamily, member 11b [Source:RGD Symbol;Acc:619802]	14.3	4.05	-1.82	0.0202	0.541176	yes	DOWN	N	N	N	Y	Y	15.48	3.77
ENSRNOG00000012821.L01	81512	Lect1	leukocyte cell derived chemotaxin 1 [Source:RGD Symbol;Acc:620176]	21.2	5.54	-1.93	0.02025	0.541184	yes	DOWN	N	N	N	Y	Y	22.88	5.15
ENSRNOG00000016377.L01	294074	Cep55	centrosomal protein 55 [Source:RGD Symbol;Acc:1305340]	3.63	0.572	-2.67	0.02045	0.54386	yes	DOWN	N	N	N	Y	Y	3.92	0.53
ENSRNOG00000028261.L01	361466	Tppp	tubulin polymerization promoting protein [Source:RGD Symbol;Acc:1310121]	30.9	10.2	-1.6	0.02045	0.54386	yes	DOWN	N	N	N	Y	Y	33.35	9.45
ENSRNOG00000018716.L01	295333	Dennd2c	DENN/MADD domain containing 2C [Source:RGD Symbol;Acc:1308197]	12.8	4.23	-1.59	0.0205	0.544525	yes	DOWN	N	N	N	Y	Y	13.78	3.94
ENSRNOG00000018126.L01	313210	Abca1	ATP-binding cassette, subfamily A (ABC1), member 1 [Source:RGD Symbol;Acc:631344]	5.5	1.54	-1.84	0.02065	0.547841	yes	DOWN	N	N	N	Y	Y	5.94	1.43
ENSRNOG00000014104.L01	25132	Myo5b	myosin Vb [Source:RGD Symbol;Acc:621347]	9.09	2.79	-1.7	0.0207	0.5485	yes	DOWN	N	N	N	Y	Y	9.82	2.6
ENSRNOG00000007909	29187	Cd69	Cd69 molecule [Source:RGD Symbol;Acc:61318]	11.1	2.41	-2.2	0.02075	0.549156	yes	DOWN	N	N	N	Y	Y	11.98	2.25
ENSRNOG00000018929.L01	309523	Kif20b	kinesin family member 20B [Source:RGD Symbol;Acc:1308497]	2.33	0.372	-2.65	0.0208	0.549812	yes	DOWN	N	N	N	Y	Y	2.51	0.35
ENSRNOG00000031232.L01	81527	Nrp2	neuropilin 2 [Source:RGD Symbol;Acc:621442]	7.15	2.21	-1.7	0.02115	0.554972	yes	DOWN	N	N	N	Y	Y	7.73	2.05
ENSRNOG00000002487.L01	302492	Mbnl3	muscleblind-like splicing regulator 3 [Source:RGD Symbol;Acc:1565834]	9.56	2.96	-1.69	0.0212	0.554972	yes	DOWN	N	N	N	Y	Y	10.32	2.76
ENSRNOG00000010529.L01	292406	Thbs2	thrombospondin 2 [Source:RGD Symbol;Acc:1310979]	2.37	0.375	-2.66	0.02125	0.554972	yes	DOWN	N	N	N	Y	Y	2.56	0.35
ENSRNOG00000014259.L01	298506	Mycl	v-myc avian myelocytomatosis viral oncogene lung carcinoma derived homolog [Source:RGD Symbol;Acc:1588591]	15.1	4	-1.91	0.02125	0.554972	yes	DOWN	N	N	N	Y	Y	16.3	3.72
ENSRNOG00000022255.L01	305265	Tmprss11e	transmembrane protease, serine 11e [Source:RGD Symbol;Acc:1561698]	2.62	0.257	-3.35	0.02125	0.554972	yes	DOWN	N	N	N	Y	Y	2.83	0.24
ENSRNOG00000015921	691979	Esco2	establishment of sister chromatid cohesion N-acetyltransferase 2 [Source:RGD Symbol;Acc:1593313]	2.83	0.449	-2.66	0.02155	0.56146	yes	DOWN	N	N	N	Y	Y	3.05	0.42
ENSRNOG00000023687.L01	114560	Rap2a	RAS related protein 2a [Source:RGD Symbol;Acc:620590]	13.2	2.25	-2.55	0.02165	0.562719	yes	DOWN	N	N	N	Y	Y	14.28	2.09
ENSRNOG00000020058.L01	83465	Celsr2	cadherin, EGF LAG seven-pass G-type receptor 2 [Source:RGD Symbol;Acc:69237]	9.42	3.19	-1.56	0.0217	0.563257	yes	DOWN	N	N	N	Y	Y	10.19	2.97
ENSRNOG00000025115.L01	315663	Exph5	exophilin 5 [Source:RGD Symbol;Acc:1560308]	10.8	3.61	-1.57	0.02175	0.563257	yes	DOWN	N	N	N	Y	Y	11.63	3.37
ENSRNOG00000000572.L01	84468	Chst3	carbohydrate (chondroitin 6) sulfotransferase 3 [Source:RGD Symbol;Acc:620355]	4.49	1.11	-2.02	0.0218	0.563257	yes	DOWN	N	N	N	Y	Y	4.86	1.03
ENSRNOG00000008986.L01	290396	Diaph3	diaphanous-related formin 3 [Source:RGD Symbol;Acc:1593287]	3.67	0.671	-2.45	0.0218	0.563257	yes	DOWN	N	N	N	Y	Y	3.96	0.62
ENSRNOG00000012494.L01	308836	Kctd14	potassium channel tetramerization domain containing 14 [Source:RGD Symbol;Acc:1306430]	40.8	13	-1.65	0.0218	0.563257	yes	DOWN	N	N	N	Y	Y	44.09	12.12
ENSRNOG00000022499.L01	363174	Sgol1	shugoshin-like 1 (S. pombe) [Source:RGD Symbol;Acc:1593238]	1.48	0.134	-3.46	0.0219	0.564502	yes	DOWN	N	N	N	Y	Y	1.6	0.13
ENSRNOG00000018580.L01	308565	Klk8	kallikrein related-peptidase 8 [Source:RGD Symbol;Acc:1305998]	3.35	0.345	-3.28	0.02225	0.57009	yes	DOWN	N	N	N	Y	Y	3.62	0.32
ENSRNOG00000009613.L01	501026	Sh3bgrl2	SH3 domain binding glutamate-rich protein like 2 [Source:RGD Symbol;Acc:1591931]	42.6	13.8	-1.62	0.02225	0.57009	yes	DOWN	N	N	N	Y	Y	46.02	12.88
ENSRNOG00000005814.L01	691543	Katnbl1	katanin p80 subunit B-like 1 [Source:RGD Symbol;Acc:1582771]	8.67	1.32	-2.72	0.02245	0.57258	yes	DOWN	N	N	N	Y	Y	9.36	1.23
ENSRNOG00000004275.L01	317470	Egfl6	EGF-like-domain, multiple 6 [Source:RGD Symbol;Acc:1563321]	39.9	12.7	-1.65	0.02275	0.579553	yes	DOWN	N	N	N	Y	Y	43.09	11.82
ENSRNOG00000023851.L01	295325	Igsf3	immunoglobulin superfamily, member 3 [Source:RGD Symbol;Acc:1307796]	5.72	1.49	-1.94	0.02285	0.580065	yes	DOWN	N	N	N	Y	Y	6.18	1.38
ENSRNOG00000019462.L01	307481	Pcdh1	protocadherin 1 [Source:RGD Symbol;Acc:1308490]	45.7	14.7	-1.63	0.023	0.583193	yes	DOWN	N	N	N	Y	Y	49.48	13.7
ENSRNOG00000014426.L01	24914	Lox	lysyl oxidase [Source:RGD Symbol;Acc:3015]	7.15	2.1	-1.76	0.02355	0.593683	yes	DOWN	N	N	N	Y	Y	7.72	1.96
ENSRNOG00000018187	100909901	LOC100909901	rac GTPase-activating protein 1-like [Source:RGD Symbol;Acc:6501444]	4.25	0.369	-3.53	0.02355	0.593683	yes	DOWN	N	N	N	Y	Y	4.59	0.34
ENSRNOG00000001960.L01	60393	Sult1d1	sulfotransferase family 1D, member 1 [Source:RGD Symbol;Acc:620491]	14.2	3.44	-2.05	0.02365	0.595515	yes	DOWN	N	N	N	Y	Y	15.35	3.21
ENSRNOG00000017163	60416	Pfkp	phosphofructokinase, platelet [Source:RGD Symbol;Acc:61893]	15.9	4.61	-1.79	0.02375	0.595966	yes	DOWN	N	N	N	Y	Y	17.21	4.29
ENSRNOG00000023549.L01	365038	Samd5	sterile alpha motif domain containing 5 [Source:RGD Symbol;Acc:1311012]	6.96	1.74	-2	0.0241	0.601975	yes	DOWN	N	N	N	Y	Y	7.52	1.62
ENSRNOG00000002002.L01	365265	Tmprss11bnl	transmembrane protease, serine 11B N terminal like [Source:RGD Symbol;Acc:1303278]	65.2	18	-1.86	0.02425	0.60351	yes	DOWN	N	N	N	Y	Y	70.42	16.75
ENSRNOG00000008678.L01	362393	Antxr1	anthrax toxin receptor 1 [Source:RGD Symbol;Acc:1307144]	38.4	11.9	-1.69	0.0245	0.607093	yes	DOWN	N	N	N	Y	Y	41.48	11.06
ENSRNOG00000007599.L01	140935	Afap1	actin filament associated protein 1 [Source:RGD Symbol;Acc:619959]	11.6	2.57	-2.18	0.0246	0.608878	yes	DOWN	N	N	N	Y	Y	12.58	2.39
ENSRNOG00000025198.L01	680280	Gas2l3	growth arrest-specific 2 like 3 [Source:RGD Symbol;Acc:1594151]	3.38	0.711	-2.25	0.0247	0.609525	yes	DOWN	N	N	N	Y	Y	3.66	0.66
ENSRNOG00000008450	100359539	LOC100359539	ribonucleotide reductase M2 polypeptide [Source:RGD Symbol;Acc:2323655]	7.61	1.25	-2.61	0.02475	0.609525	yes	DOWN	N	N	N	Y	Y	8.22	1.16
ENSRNOG00000015445.L01	25263	Mal	mal, T-cell differentiation protein [Source:RGD Symbol;Acc:3037]	177	53.4	-1.73	0.0248	0.609525	yes	DOWN	N	N	N	Y	Y	191.2	49.75
ENSRNOG00000010527	24795	Serpina3n	serine (or cysteine) peptidase inhibitor, clade A, member 3N [Source:RGD Symbol;Acc:3747]	5.04	1.15	-2.14	0.02485	0.609525	yes	DOWN	N	N	N	Y	Y	5.45	1.07
ENSRNOG00000002396.L01	288937	Serpinb8	serpin peptidase inhibitor, clade B (ovalbumin), member 8 [Source:RGD Symbol;Acc:1309833]	32.3	10.9	-1.56	0.02485	0.609525	yes	DOWN	N	N	N	Y	Y	34.84	10.18
ENSRNOG00000024365.L01	361921	Ect2	epithelial cell transforming 2 [Source:RGD Symbol;Acc:1308524]	6.09	0.589	-3.37	0.0251	0.613584	yes	DOWN	N	N	N	Y	Y	6.58	0.55
ENSRNOG00000011381	171410	Acsbg1	acyl-CoA synthetase bubblegum family member 1 [Source:RGD Symbol;Acc:708557]	11.4	2.47	-2.21	0.0254	0.619527	yes	DOWN	N	N	N	Y	Y	12.31	2.29
ENSRNOG00000005871.L01	60582	Il1rn	interleukin 1 receptor antagonist [Source:RGD Symbol;Acc:621159]	21.4	5.66	-1.91	0.02575	0.625961	yes	DOWN	N	N	N	Y	Y	23.06	5.28
ENSRNOG00000009314.L01	60583	Ivl	involucrin [Source:RGD Symbol;Acc:620141]	1.9	0.171	-3.48	0.0258	0.626477	yes	DOWN	N	N	N	Y	Y	2.05	0.16
ENSRNOG00000002209.L01	305367	Arap2	ArfGAP with RhoGAP domain, ankyrin repeat and PH domain 2 [Source:RGD Symbol;Acc:1306452]	13.6	4.6	-1.56	0.0259	0.627506	yes	DOWN	N	N	N	Y	Y	14.63	4.29
ENSRNOG00000024711.L01	360652	Sdk2	sidekick cell adhesion molecule 2 [Source:RGD Symbol;Acc:1310397]	1.09	0.117	-3.21	0.02595	0.628019	yes	DOWN	N	N	N	Y	Y	1.18	0.11
ENSRNOG00000013727.L01	301701	Ndc80	NDC80 kinetochore complex component [Source:RGD Symbol;Acc:1310154]	4.14	0.694	-2.58	0.02605	0.629041	yes	DOWN	N	N	N	Y	Y	4.47	0.65
ENSRNOG00000032396.L02	287231	RGD1559575	similar to novel protein [Source:RGD Symbol;Acc:1559575]	16.5	5.63	-1.55	0.02615	0.630566	yes	DOWN	N	N	N	Y	Y	17.77	5.24
ENSRNOG00000008645.L01	24484	Igfbp3	insulin-like growth factor binding protein 3 [Source:RGD Symbol;Acc:2874]	199	55.9	-1.83	0.0262	0.630566	yes	DOWN	N	N	N	Y	Y	215.4	52.03
ENSRNOG00000000632.L01	54237	Cdk1	cyclin-dependent kinase 1 [Source:RGD Symbol;Acc:2319]	15.1	2.75	-2.46	0.02645	0.633085	yes	DOWN	N	N	N	Y	Y	16.31	2.56
ENSRNOG00000024650	691173	Ckap2	cytoskeleton associated protein 2 [Source:RGD Symbol;Acc:1311631]	6.24	1.46	-2.09	0.02645	0.633085	yes	DOWN	N	N	N	Y	Y	6.74	1.36
ENSRNOG00000018113	307056	Anlnl1	anillin, actin binding protein-like 1 [Source:RGD Symbol;Acc:1566097]	3.98	0.332	-3.58	0.02655	0.633391	yes	DOWN	N	N	N	Y	Y	4.3	0.31
ENSRNOG00000050215	682408	LOC682408	similar to corneodesmosin [Source:RGD Symbol;Acc:1583483]	23.6	5.32	-2.15	0.02685	0.638245	yes	DOWN	N	N	N	Y	Y	25.46	4.95
ENSRNOG00000014578.L01	64190	Fxyd4	FXYD domain-containing ion transport regulator 4 [Source:RGD Symbol;Acc:70998]	83.7	23.2	-1.85	0.0269	0.638245	yes	DOWN	N	N	N	Y	Y	90.44	21.62
ENSRNOG00000006367.L01	500820	Slc5a8	solute carrier family 5 (sodium/monocarboxylate cotransporter), member 8 [Source:RGD Symbol;Acc:1564146]	4.79	1.25	-1.94	0.0271	0.641593	yes	DOWN	N	N	N	Y	Y	5.18	1.16
ENSRNOG00000010484.L01	298184	Zdhhc21	zinc finger, DHHC-type containing 21 [Source:RGD Symbol;Acc:1305750]	7.26	1.26	-2.52	0.0272	0.641991	yes	DOWN	N	N	N	Y	Y	7.84	1.18
ENSRNOG00000011238.L01	310467	Tiparp	TCDD-inducible poly(ADP-ribose) polymerase [Source:RGD Symbol;Acc:1306171]	18.5	6.06	-1.61	0.02725	0.641991	yes	DOWN	N	N	N	Y	Y	19.99	5.65
ENSRNOG00000005743	362136	Dapl1	death associated protein-like 1 [Source:RGD Symbol;Acc:1309610]	265	96.8	-1.45	0.02725	0.641991	yes	DOWN	N	N	N	Y	Y	285.99	90.04
ENSRNOG00000005599.L01	297572	Cpamd8	C3 and PZP-like, alpha-2-macroglobulin domain containing 8 [Source:EntrezGene;Acc:297572]	3.18	0.431	-2.88	0.0273	0.641991	yes	DOWN	N	N	N	Y	Y	3.43	0.4
ENSRNOG00000002583.L01	304689	Serpinb11	serpin peptidase inhibitor, clade B (ovalbumin), member 11 [Source:RGD Symbol;Acc:1306497]	14.6	3.42	-2.1	0.0274	0.641991	yes	DOWN	N	N	N	Y	Y	15.77	3.18
ENSRNOG00000018742.L01	292849	Klk11	kallikrein related-peptidase 11 [Source:RGD Symbol;Acc:1308690]	14.2	0.561	-4.66	0.02745	0.641991	yes	DOWN	N	N	N	Y	Y	15.37	0.52
ENSRNOG00000011409	308632	Hebp2	heme binding protein 2 [Source:RGD Symbol;Acc:1311553]	33.9	10.3	-1.72	0.0275	0.641991	yes	DOWN	N	N	N	Y	Y	36.68	9.57
ENSRNOG00000004968.L01	362798	Ncapg2	non-SMC condensin II complex, subunit G2 [Source:RGD Symbol;Acc:1308406]	3.84	1.01	-1.93	0.0275	0.641991	yes	DOWN	N	N	N	Y	Y	4.14	0.94
ENSRNOG00000001724.L01	678704	Atp13a3	ATPase type 13A3 [Source:RGD Symbol;Acc:1590881]	7.9	1.26	-2.65	0.02755	0.64247	yes	DOWN	N	N	N	Y	Y	8.53	1.17
ENSRNOG00000021713.L01	303575	Kif18b	kinesin family member 18B [Source:RGD Symbol;Acc:1310360]	4.05	0.735	-2.46	0.0277	0.64395	yes	DOWN	N	N	N	Y	Y	4.38	0.68
ENSRNOG00000005639.L01	24208	Ar	androgen receptor [Source:RGD Symbol;Acc:2147]	5.05	1.73	-1.55	0.02775	0.64395	yes	DOWN	N	N	N	Y	Y	5.45	1.61
ENSRNOG00000022116.L01	84403	Gjb6	gap junction protein, beta 6 [Source:RGD Symbol;Acc:621830]	6.41	0.458	-3.81	0.0278	0.64395	yes	DOWN	N	N	N	Y	Y	6.92	0.43
ENSRNOG00000037436.L01	314539	Macc1	metastasis associated in colon cancer 1 [Source:RGD Symbol;Acc:1309838]	4.4	1.04	-2.08	0.0278	0.64395	yes	DOWN	N	N	N	Y	Y	4.75	0.97
ENSRNOG00000013894.L01	310443	Gpr87	G protein-coupled receptor 87 [Source:RGD Symbol;Acc:1307852]	20.8	5.64	-1.88	0.02785	0.64395	yes	DOWN	N	N	N	Y	Y	22.45	5.25
ENSRNOG00000019412.L01	310625	Rhbg	Rh family, B glycoprotein [Source:RGD Symbol;Acc:727813]	16.8	3.34	-2.33	0.02785	0.64395	yes	DOWN	N	N	N	Y	Y	18.16	3.11
ENSRNOG00000012442.L01	308797	Cemip	cell migration inducing protein, hyaluronan binding [Source:RGD Symbol;Acc:1305254]	2.01	0.105	-4.26	0.0281	0.648134	yes	DOWN	N	N	N	Y	Y	2.17	0.1
ENSRNOG00000001031.L01	25503	Ocm2	oncomodulin 2 [Source:RGD Symbol;Acc:3222]	54.7	14.7	-1.9	0.02815	0.648134	yes	DOWN	N	N	N	Y	Y	59.08	13.66
ENSRNOG00000012149.L01	362021	Gpsm2	G-protein signaling modulator 2 [Source:RGD Symbol;Acc:1560967]	11	2.92	-1.92	0.0282	0.6486	yes	DOWN	N	N	N	Y	Y	11.91	2.72
ENSRNOG00000020901.L01	60399	S1pr5	sphingosine-1-phosphate receptor 5 [Source:RGD Symbol;Acc:620566]	31.8	9.35	-1.77	0.02835	0.650676	yes	DOWN	N	N	N	Y	Y	34.41	8.7
ENSRNOG00000005887.L01	680210	Psca	prostate stem cell antigen [Source:RGD Symbol;Acc:1594221]	133	33.7	-1.98	0.02855	0.653888	yes	DOWN	N	N	N	Y	Y	143.33	31.38
ENSRNOG00000019138.L01	29313	Clec11a	C-type lectin domain family 11, member A [Source:RGD Symbol;Acc:3627]	4.21	0.74	-2.51	0.0287	0.656633	yes	DOWN	N	N	N	Y	Y	4.55	0.69
ENSRNOG00000002578.L01	498209	Serpinb3a	serine (or cysteine) peptidase inhibitor, clade B (ovalbumin), member 3A [Source:RGD Symbol;Acc:1562868]	6	0.42	-3.84	0.0288	0.65823	yes	DOWN	N	N	N	Y	Y	6.48	0.39
ENSRNOG00000010575.L01	362046	Dapp1	dual adaptor of phosphotyrosine and 3-phosphoinositides [Source:RGD Symbol;Acc:1310189]	8.18	2.25	-1.86	0.02895	0.659582	yes	DOWN	N	N	N	Y	Y	8.84	2.09
ENSRNOG00000006631.L01	296789	Sema3e	sema domain, immunoglobulin domain (Ig), short basic domain, secreted, (semaphorin) 3E [Source:RGD Symbol;Acc:1310973]	3.61	0.939	-1.94	0.02905	0.659789	yes	DOWN	N	N	N	Y	Y	3.9	0.88
ENSRNOG00000024230.L01	315673	Tnfaip8l3	tumor necrosis factor, alpha-induced protein 8-like 3 [Source:RGD Symbol;Acc:1311533]	5.79	1.05	-2.46	0.02905	0.659789	yes	DOWN	N	N	N	Y	Y	6.25	0.98
ENSRNOG00000029055.L01	315852	Ttk	Ttk protein kinase [Source:RGD Symbol;Acc:1305558]	2.57	0.292	-3.14	0.02905	0.659789	yes	DOWN	N	N	N	Y	Y	2.77	0.27
ENSRNOG00000017686.L01	301489	Pi15	peptidase inhibitor 15 [Source:RGD Symbol;Acc:1309577]	3.97	0.833	-2.25	0.0293	0.663392	yes	DOWN	N	N	N	Y	Y	4.29	0.78
ENSRNOG00000021916.L01	309525	Slc16a12	solute carrier family 16, member 12 [Source:RGD Symbol;Acc:1311468]	29.4	10.3	-1.52	0.02955	0.668358	yes	DOWN	N	N	N	Y	Y	31.8	9.59
ENSRNOG00000005404.L01	29434	Rasgrp1	RAS guanyl releasing protein 1 (calcium and DAG-regulated) [Source:RGD Symbol;Acc:3539]	11.6	3.82	-1.6	0.0297	0.670358	yes	DOWN	N	N	N	Y	Y	12.51	3.56
ENSRNOG00000018856.L01	363458	Col4a6	collagen, type IV, alpha 6 [Source:RGD Symbol;Acc:1589724]	2.15	0.557	-1.95	0.0297	0.670358	yes	DOWN	N	N	N	Y	Y	2.32	0.52
ENSRNOG00000006205.L01	305584	Rel	v-rel avian reticuloendotheliosis viral oncogene homolog [Source:RGD Symbol;Acc:1311231]	5.64	1.32	-2.09	0.0299	0.673477	yes	DOWN	N	N	N	Y	Y	6.09	1.23
ENSRNOG00000007234	25427	Cyp51	cytochrome P450, family 51 [Source:RGD Symbol;Acc:2481]	26.9	9.41	-1.52	0.03015	0.67631	yes	DOWN	N	N	N	Y	Y	29.07	8.76
ENSRNOG00000014479.L01	310760	Cttnbp2nl	CTTNBP2 N-terminal like [Source:RGD Symbol;Acc:1310822]	20.2	7.33	-1.46	0.03015	0.67631	yes	DOWN	N	N	N	Y	Y	21.76	6.83
ENSRNOG00000028415	64515	Cdc20	cell division cycle 20 [Source:RGD Symbol;Acc:620477]	9.97	2.42	-2.04	0.0302	0.676735	yes	DOWN	N	N	N	Y	Y	10.78	2.25
ENSRNOG00000016695.L01	81686	Mmp2	matrix metallopeptidase 2 [Source:RGD Symbol;Acc:621316]	81.9	28	-1.55	0.03045	0.680237	yes	DOWN	N	N	N	Y	Y	88.48	26.07
ENSRNOG00000001925.L01	288016	Leprel1	leprecan-like 1 [Source:RGD Symbol;Acc:1304568]	25.9	8.95	-1.54	0.0306	0.681491	yes	DOWN	N	N	N	Y	Y	28.03	8.32
ENSRNOG00000013380	171581	Rhov	ras homolog family member V [Source:RGD Symbol;Acc:628824]	52.9	18.6	-1.51	0.0312	0.692428	yes	DOWN	N	N	N	Y	Y	57.16	17.32
ENSRNOG00000037227.L01	24884	Yes1	Yamaguchi sarcoma viral (v-yes) oncogene homolog 1 [Source:RGD Symbol;Acc:3977]	20.1	6.3	-1.67	0.03125	0.692428	yes	DOWN	N	N	N	Y	Y	21.71	5.87
ENSRNOG00000028156.L01	25096	Pld1	phospholipase D1 [Source:RGD Symbol;Acc:3349]	12.3	4.17	-1.56	0.0313	0.69253	yes	DOWN	N	N	N	Y	Y	13.27	3.88
ENSRNOG00000011071.L01	58813	Nt5e	5' nucleotidase, ecto [Source:RGD Symbol;Acc:61956]	23	8.21	-1.49	0.03145	0.693332	yes	DOWN	N	N	N	Y	Y	24.87	7.65
ENSRNOG00000014164.L01	315741	Paqr5	progestin and adipoQ receptor family member V [Source:RGD Symbol;Acc:1311259]	41.3	14	-1.56	0.03165	0.697036	yes	DOWN	N	N	N	Y	Y	44.59	13.01
ENSRNOG00000024594.L01	295161	Fhdc1	FH2 domain containing 1 [Source:RGD Symbol;Acc:1311955]	27.2	9.74	-1.48	0.0322	0.703459	yes	DOWN	N	N	N	Y	Y	29.4	9.06
ENSRNOG00000018525.L01	266612	Slc4a9	solute carrier family 4, sodium bicarbonate cotransporter, member 9 [Source:RGD Symbol;Acc:628811]	4.05	0.567	-2.84	0.03225	0.703845	yes	DOWN	N	N	N	Y	Y	4.38	0.53
ENSRNOG00000046772.L01	683506	Fam83c	family with sequence similarity 83, member C [Source:RGD Symbol;Acc:1585687]	4.93	1.19	-2.05	0.0324	0.706411	yes	DOWN	N	N	N	Y	Y	5.33	1.11
ENSRNOG00000049052.L01	171498	Sgk3	serum/glucocorticoid regulated kinase family, member 3 [Source:RGD Symbol;Acc:620242]	14.4	4.66	-1.63	0.03245	0.706793	yes	DOWN	N	N	N	Y	Y	15.59	4.35
ENSRNOG00000000479	294286	Kifc1	kinesin family member C1 [Source:RGD Symbol;Acc:1359118]	9.01	2.26	-1.99	0.0326	0.707937	yes	DOWN	N	N	N	Y	Y	9.74	2.1
ENSRNOG00000002624.L01	498769	Edaradd	EDAR-associated death domain [Source:RGD Symbol;Acc:1564010]	18	4.86	-1.89	0.0327	0.708695	yes	DOWN	N	N	N	Y	Y	19.44	4.52
ENSRNOG00000013598.L01	362510	Melk	maternal embryonic leucine zipper kinase [Source:RGD Symbol;Acc:1308974]	2.82	0.261	-3.43	0.0332	0.713145	yes	DOWN	N	N	N	Y	Y	3.05	0.24
ENSRNOG00000030264	362937	Fam83h	family with sequence similarity 83, member H [Source:RGD Symbol;Acc:1305866]	44.1	15	-1.56	0.03335	0.714957	yes	DOWN	N	N	N	Y	Y	47.74	13.97
ENSRNOG00000027157.L01	406866	Ly6g6e	lymphocyte antigen 6 complex, locus G6E [Source:RGD Symbol;Acc:1303112]	70.7	18.2	-1.95	0.0335	0.716762	yes	DOWN	N	N	N	Y	Y	76.41	16.96
ENSRNOG00000011387.L01	680576	Tet3	tet methylcytosine dioxygenase 3 [Source:RGD Symbol;Acc:1590584]	14.6	4.93	-1.57	0.03365	0.717856	yes	DOWN	N	N	N	Y	Y	15.8	4.59
ENSRNOG00000016477.L01	690366	Vangl1	VANGL planar cell polarity protein 1 [Source:RGD Symbol;Acc:1597324]	27.2	9.21	-1.56	0.03415	0.725679	yes	DOWN	N	N	N	Y	Y	29.38	8.58
ENSRNOG00000004487.L01	690209	Nek2	NIMA-related kinase 2 [Source:RGD Symbol;Acc:619792]	2.31	0.247	-3.22	0.03425	0.725681	yes	DOWN	N	N	N	Y	Y	2.5	0.23
ENSRNOG00000012835.L01	315330	Espl1	extra spindle pole bodies homolog 1 (S. cerevisiae) [Source:RGD Symbol;Acc:1306266]	2.45	0.504	-2.28	0.03435	0.725681	yes	DOWN	N	N	N	Y	Y	2.65	0.47
ENSRNOG00000010124.L01	361970	Trim2	tripartite motif-containing 2 [Source:RGD Symbol;Acc:1310981]	16.1	5.35	-1.59	0.03435	0.725681	yes	DOWN	N	N	N	Y	Y	17.42	4.98
ENSRNOG00000011907.L01	287678	Krt23	keratin 23 (histone deacetylase inducible) [Source:RGD Symbol;Acc:1308838]	106	29.4	-1.86	0.03445	0.727089	yes	DOWN	N	N	N	Y	Y	114.96	27.32
ENSRNOG00000009005.L01	24546	Slco2a1	solute carrier organic anion transporter family, member 2a1 [Source:RGD Symbol;Acc:3051]	17.5	5.6	-1.64	0.0345	0.727435	yes	DOWN	N	N	N	Y	Y	18.86	5.21
ENSRNOG00000001804.L01	81678	Itpr2	inositol 1,4,5-trisphosphate receptor, type 2 [Source:EntrezGene;Acc:81678]	11.8	4.05	-1.55	0.0346	0.727435	yes	DOWN	N	N	N	Y	Y	12.79	3.77
ENSRNOG00000001192	288707	Gltp	glycolipid transfer protein [Source:RGD Symbol;Acc:1564442]	176	57.2	-1.62	0.03475	0.729181	yes	DOWN	N	N	N	Y	Y	189.76	53.22
ENSRNOG00000043304.L01	689616	Apcdd1	adenomatosis polyposis coli down-regulated 1 [Source:RGD Symbol;Acc:1589962]	41.9	14.8	-1.5	0.03495	0.731264	yes	DOWN	N	N	N	Y	Y	45.3	13.81
ENSRNOG00000018003.L01	116677	F2rl1	coagulation factor II (thrombin) receptor-like 1 [Source:RGD Symbol;Acc:620866]	16.5	5.52	-1.58	0.03505	0.732653	yes	DOWN	N	N	N	Y	Y	17.79	5.14
ENSRNOG00000001547	84114	Agps	alkylglycerone phosphate synthase [Source:RGD Symbol;Acc:620364]	23	6.73	-1.77	0.03515	0.733335	yes	DOWN	N	N	N	Y	Y	24.82	6.26
ENSRNOG00000017828.L01	25148	Egr3	early growth response 3 [Source:RGD Symbol;Acc:2545]	2.89	0.304	-3.25	0.03525	0.734016	yes	DOWN	N	N	N	Y	Y	3.13	0.28
ENSRNOG00000008305.L01	114100	Sc5d	sterol-C5-desaturase [Source:RGD Symbol;Acc:620775]	25.7	8.05	-1.68	0.03525	0.734016	yes	DOWN	N	N	N	Y	Y	27.77	7.5
ENSRNOG00000016752.L01	171547	Crispld2	cysteine-rich secretory protein LCCL domain containing 2 [Source:RGD Symbol;Acc:620860]	31.3	10.7	-1.56	0.03535	0.735031	yes	DOWN	N	N	N	Y	Y	33.85	9.92
ENSRNOG00000013167	100912122	Hmgb2	high mobility group box 2 [Source:RGD Symbol;Acc:69291]	79.7	28.3	-1.49	0.0356	0.73848	yes	DOWN	N	N	N	Y	Y	86.14	26.36
ENSRNOG00000030021.L01	287910	Ccl6	chemokine (C-C motif) ligand 6 [Source:RGD Symbol;Acc:1303200]	19.4	5.22	-1.89	0.0361	0.745302	yes	DOWN	N	N	N	Y	Y	20.92	4.87
ENSRNOG00000004635	314771	Kera	keratocan [Source:RGD Symbol;Acc:1305816]	2.67	0.294	-3.18	0.0362	0.746659	yes	DOWN	N	N	N	Y	Y	2.88	0.27
ENSRNOG00000012575.L01	65048	Fat2	FAT atypical cadherin 2 [Source:RGD Symbol;Acc:620656]	13.3	4.58	-1.54	0.0364	0.749365	yes	DOWN	N	N	N	Y	Y	14.36	4.26
ENSRNOG00000009620.L01	295669	Cybrd1	cytochrome b reductase 1 [Source:RGD Symbol;Acc:1305740]	5.15	1.49	-1.79	0.03655	0.751034	yes	DOWN	N	N	N	Y	Y	5.57	1.39
ENSRNOG00000002175.L01	100911602	LOC100911602	circadian locomoter output cycles protein kaput-like [Source:RGD Symbol;Acc:6492097]	13.5	4.08	-1.73	0.0373	0.760703	yes	DOWN	N	N	N	Y	Y	14.59	3.8
ENSRNOG00000019414.L01	310626	Tmem79	transmembrane protein 79 [Source:RGD Symbol;Acc:1309886]	19	6.07	-1.65	0.03765	0.765691	yes	DOWN	N	N	N	Y	Y	20.55	5.64
ENSRNOG00000017440	25181	Bgn	biglycan [Source:RGD Symbol;Acc:2207]	98.4	29.7	-1.73	0.0378	0.767608	yes	DOWN	N	N	N	Y	Y	106.25	27.66
ENSRNOG00000030285.L01	29210	Epha3	Eph receptor A3 [Source:RGD Symbol;Acc:68389]	3.05	0.778	-1.97	0.03785	0.767608	yes	DOWN	N	N	N	Y	Y	3.3	0.73
ENSRNOG00000016334.L01	83515	Ptbp3	polypyrimidine tract binding protein 3 [Source:RGD Symbol;Acc:621671]	36.8	13.5	-1.45	0.0381	0.769811	yes	DOWN	N	N	N	Y	Y	39.68	12.58
ENSRNOG00000013140.L01	65034	Pdzd2	PDZ domain containing 2 [Source:RGD Symbol;Acc:619958]	13	4.8	-1.43	0.03815	0.770107	yes	DOWN	N	N	N	Y	Y	14.03	4.47
ENSRNOG00000016953.L01	307838	Chst4	carbohydrate (N-acetylglucosamine 6-O) sulfotransferase 4 [Source:RGD Symbol;Acc:1310798]	5.95	1.59	-1.91	0.03835	0.773427	yes	DOWN	N	N	N	Y	Y	6.43	1.48
ENSRNOG00000014441	303530	Krt16	keratin 16 [Source:RGD Symbol;Acc:1590901]	10.5	1.11	-3.23	0.03845	0.774727	yes	DOWN	N	N	N	Y	Y	11.3	1.03
ENSRNOG00000019770.L01	365299	Bnc1	basonuclin 1 [Source:RGD Symbol;Acc:1309042]	0.704	0.088	-3	0.03855	0.776024	yes	DOWN	N	N	N	Y	Y	0.76	0.08
ENSRNOG00000010430.L01	680858	Tmem40	transmembrane protein 40 [Source:RGD Symbol;Acc:1587025]	10.6	2.11	-2.32	0.03865	0.776601	yes	DOWN	N	N	N	Y	Y	11.41	1.96
ENSRNOG00000015357	300455	Bmper	BMP-binding endothelial regulator [Source:RGD Symbol;Acc:1563373]	2.12	0.446	-2.25	0.0387	0.776889	yes	DOWN	N	N	N	Y	Y	2.29	0.42
ENSRNOG00000010514.L01	298267	Cachd1	cache domain containing 1 [Source:RGD Symbol;Acc:1310770]	11.7	4.26	-1.46	0.0388	0.777463	yes	DOWN	N	N	N	Y	Y	12.67	3.97
ENSRNOG00000047314.L01	24834	Tk1	thymidine kinase 1, soluble [Source:RGD Symbol;Acc:621014]	17	3.58	-2.25	0.0389	0.778036	yes	DOWN	N	N	N	Y	Y	18.35	3.33
ENSRNOG00000013213	316539	Epha4	Eph receptor A4 [Source:RGD Symbol;Acc:1560587]	5.68	1.88	-1.59	0.0389	0.778036	yes	DOWN	N	N	N	Y	Y	6.13	1.75
ENSRNOG00000007818.L01	315054	Slc45a4	solute carrier family 45, member 4 [Source:RGD Symbol;Acc:1309971]	26.5	8.66	-1.61	0.0391	0.779028	yes	DOWN	N	N	N	Y	Y	28.6	8.05
ENSRNOG00000012830.L01	316275	Paqr8	progestin and adipoQ receptor family member VIII [Source:RGD Symbol;Acc:1311710]	10.5	3.58	-1.55	0.0392	0.779028	yes	DOWN	N	N	N	Y	Y	11.31	3.33
ENSRNOG00000022911.L01	316602	Hjurp	Holliday junction recognition protein [Source:RGD Symbol;Acc:1305846]	7.66	2.5	-1.62	0.03925	0.779311	yes	DOWN	N	N	N	Y	Y	8.27	2.32
ENSRNOG00000013994.L01	85496	Enpp1	ectonucleotide pyrophosphatase/phosphodiesterase 1 [Source:RGD Symbol;Acc:628825]	13.7	4.51	-1.6	0.0395	0.782848	yes	DOWN	N	N	N	Y	Y	14.79	4.19
ENSRNOG00000012364.L01	312563	Prickle2	prickle homolog 2 (Drosophila) [Source:RGD Symbol;Acc:1306723]	4.03	1.22	-1.73	0.0395	0.782848	yes	DOWN	N	N	N	Y	Y	4.36	1.13
ENSRNOG00000006170.L01	313125	Bach2	BTB and CNC homology 1, basic leucine zipper transcription factor 2 [Source:RGD Symbol;Acc:1562865]	3.42	1.02	-1.75	0.0398	0.785496	yes	DOWN	N	N	N	Y	Y	3.7	0.95
ENSRNOG00000001554.L01	360692	RGD1563888	similar to DNA segment, Chr 16, ERATO Doi 472, expressed [Source:RGD Symbol;Acc:1563888]	12.8	4.8	-1.42	0.0398	0.785496	yes	DOWN	N	N	N	Y	Y	13.85	4.47
ENSRNOG00000007483.L01	117524	Ccnf	cyclin F [Source:RGD Symbol;Acc:67401]	4.09	0.817	-2.32	0.03985	0.785496	yes	DOWN	N	N	N	Y	Y	4.42	0.76
ENSRNOG00000015410	306805	Aspn	asporin [Source:RGD Symbol;Acc:1549776]	6.22	1.23	-2.34	0.0405	0.790707	yes	DOWN	N	N	N	Y	Y	6.72	1.15
ENSRNOG00000020270.L01	306283	Anxa8	annexin A8 [Source:RGD Symbol;Acc:1307719]	256	83.6	-1.62	0.04085	0.792301	yes	DOWN	N	N	N	Y	Y	276.82	77.75
ENSRNOG00000009344.L01	299142	Syt16	synaptotagmin XVI [Source:RGD Symbol;Acc:1564654]	9.99	2.99	-1.74	0.0412	0.792736	yes	DOWN	N	N	N	Y	Y	10.79	2.79
ENSRNOG00000042603.L01	298186	Ttc39b	tetratricopeptide repeat domain 39B [Source:RGD Symbol;Acc:1305797]	9.06	3.23	-1.49	0.0414	0.794479	yes	DOWN	N	N	N	Y	Y	9.79	3.01
ENSRNOG00000007419.L01	360511	LOC100362038	pantothenate kinase 3 [Source:RGD Symbol;Acc:2318942]	15.9	5.75	-1.47	0.04155	0.796655	yes	DOWN	N	N	N	Y	Y	17.14	5.36
ENSRNOG00000028368	360843	Etnk2	ethanolamine kinase 2 [Source:RGD Symbol;Acc:1305304]	3.68	0.805	-2.19	0.04195	0.802206	yes	DOWN	N	N	N	Y	Y	3.97	0.75
ENSRNOG00000030694	305844	Rnase1l2	ribonuclease, RNase A family, 1-like 2 (pancreatic) [Source:RGD Symbol;Acc:1565230]	7.06	0.863	-3.03	0.042	0.802458	yes	DOWN	N	N	N	Y	Y	7.63	0.8
ENSRNOG00000016103.L01	308068	Nkd2	naked cuticle homolog 2 (Drosophila) [Source:RGD Symbol;Acc:1311459]	8.42	2.87	-1.55	0.0425	0.810147	yes	DOWN	N	N	N	Y	Y	9.1	2.67
ENSRNOG00000014863.L01	313488	Reck	reversion-inducing-cysteine-rich protein with kazal motifs [Source:RGD Symbol;Acc:1308845]	13.7	5.15	-1.42	0.04265	0.810147	yes	DOWN	N	N	N	Y	Y	14.84	4.79
ENSRNOG00000008515	315524	Tmem45b	transmembrane protein 45b [Source:RGD Symbol;Acc:1305586]	5.73	1.49	-1.95	0.04265	0.810147	yes	DOWN	N	N	N	Y	Y	6.19	1.39
ENSRNOG00000014166.L01	100910861	Smoc2	SPARC related modular calcium binding 2 [Source:RGD Symbol;Acc:1306681]	8.1	2.4	-1.75	0.04275	0.81039	yes	DOWN	N	N	N	Y	Y	8.75	2.24
ENSRNOG00000001730.L01	619382	Acap2	ArfGAP with coiled-coil, ankyrin repeat and PH domains 2 [Source:RGD Symbol;Acc:1562939]	10.8	3.97	-1.45	0.04285	0.811579	yes	DOWN	N	N	N	Y	Y	11.68	3.7
ENSRNOG00000016581.L01	291091	Serpinb1a	serine (or cysteine) proteinase inhibitor, clade B, member 1a [Source:RGD Symbol;Acc:1306203]	246	85.9	-1.52	0.04305	0.813951	yes	DOWN	N	N	N	Y	Y	265.99	79.97
ENSRNOG00000011424	290789	Cldn23	claudin 23 [Source:RGD Symbol;Acc:1309001]	44.8	17.1	-1.39	0.0434	0.816317	yes	DOWN	N	N	N	Y	Y	48.47	15.88
ENSRNOG00000033618.L01	312115	Col28a1	collagen, type XXVIII, alpha 1 [Source:RGD Symbol;Acc:1564680]	4.38	1.19	-1.88	0.0436	0.819372	yes	DOWN	N	N	N	Y	Y	4.73	1.11
ENSRNOG00000006030.L01	25613	Ptprz1	protein tyrosine phosphatase, receptor-type, Z polypeptide 1 [Source:RGD Symbol;Acc:3455]	14.1	5.15	-1.45	0.04395	0.820991	yes	DOWN	N	N	N	Y	Y	15.2	4.8
ENSRNOG00000006060.L01	299996	Matn2	matrilin 2 [Source:RGD Symbol;Acc:1305353]	32.7	11.8	-1.47	0.04395	0.820991	yes	DOWN	N	N	N	Y	Y	35.37	11.01
ENSRNOG00000031475.L01	366474	Col16a1	collagen, type XVI, alpha 1 [Source:RGD Symbol;Acc:1310982]	12.3	4.42	-1.47	0.04395	0.820991	yes	DOWN	N	N	N	Y	Y	13.29	4.11
ENSRNOG00000008165.L01	311546	Tpx2	TPX2, microtubule-associated [Source:RGD Symbol;Acc:1311894]	6.97	0.949	-2.88	0.04415	0.82261	yes	DOWN	N	N	N	Y	Y	7.52	0.88
ENSRNOG00000013428.L01	296981	Atp6v0a4	ATPase, H+ transporting, lysosomal V0 subunit A4 [Source:RGD Symbol;Acc:1305055]	2.62	0.266	-3.3	0.0445	0.827715	yes	DOWN	N	N	N	Y	Y	2.83	0.25
ENSRNOG00000028108.L01	498392	Cytl1	cytokine like 1 [Source:RGD Symbol;Acc:1561846]	139	46	-1.6	0.04465	0.829797	yes	DOWN	N	N	N	Y	Y	150.43	42.81
ENSRNOG00000001924.L01	246334	Tp63	tumor protein p63 [Source:RGD Symbol;Acc:620863]	82.1	25.4	-1.69	0.0451	0.833183	yes	DOWN	N	N	N	Y	Y	88.65	23.67
ENSRNOG00000016085	300679	Mpzl2	myelin protein zero-like 2 [Source:RGD Symbol;Acc:1307196]	79.3	30.2	-1.39	0.04595	0.842455	yes	DOWN	N	N	N	Y	Y	85.69	28.15
ENSRNOG00000000321	25145	Cd24	CD24 molecule [Source:RGD Symbol;Acc:2298]	205	72	-1.51	0.0464	0.848255	yes	DOWN	N	N	N	Y	Y	221.3	67.08
ENSRNOG00000015655	29602	Ptgfrn	prostaglandin F2 receptor inhibitor [Source:RGD Symbol;Acc:3437]	16.7	6.36	-1.39	0.0465	0.848255	yes	DOWN	N	N	N	Y	Y	18.03	5.92
ENSRNOG00000011284.L01	310849	Sgms2	sphingomyelin synthase 2 [Source:RGD Symbol;Acc:1305778]	4.38	1.31	-1.74	0.0466	0.848646	yes	DOWN	N	N	N	Y	Y	4.73	1.22
ENSRNOG00000006236.L01	499933	Dsn1	DSN1, MIS12 kinetochore complex component [Source:RGD Symbol;Acc:1565179]	3.92	0.676	-2.53	0.0466	0.848646	yes	DOWN	N	N	N	Y	Y	4.23	0.63
ENSRNOG00000020784	499303	Kcnk7	potassium channel, subfamily K, member 7 [Source:RGD Symbol;Acc:1565025]	13.1	1.73	-2.91	0.0467	0.848646	yes	DOWN	N	N	N	Y	Y	14.11	1.61
ENSRNOG00000000805.L01	24392	Gja1	gap junction protein, alpha 1 [Source:RGD Symbol;Acc:2690]	45.7	17.8	-1.36	0.0468	0.848646	yes	DOWN	N	N	N	Y	Y	49.36	16.56
ENSRNOG00000009222	366492	Epha2	Eph receptor A2 [Source:RGD Symbol;Acc:1307204]	42.3	16.4	-1.37	0.04695	0.848646	yes	DOWN	N	N	N	Y	Y	45.77	15.24
ENSRNOG00000014859.L01	293561	Rnf152	ring finger protein 152 [Source:RGD Symbol;Acc:1305251]	2.61	0.688	-1.92	0.04715	0.849194	yes	DOWN	N	N	N	Y	Y	2.81	0.64
ENSRNOG00000008040	360559	Fam64a	family with sequence similarity 64, member A [Source:RGD Symbol;Acc:1308747]	4.88	0.652	-2.9	0.04715	0.849194	yes	DOWN	N	N	N	Y	Y	5.27	0.61
ENSRNOG00000003031.L01	29600	Atp2b4	ATPase, Ca++ transporting, plasma membrane 4 [Source:RGD Symbol;Acc:621305]	10.2	4.15	-1.3	0.04745	0.849194	yes	DOWN	N	N	N	Y	Y	11.03	3.87
ENSRNOG00000021140.L01	116489	Kcnk4	potassium channel, subfamily K, member 4 [Source:RGD Symbol;Acc:621449]	13.7	4.85	-1.5	0.0475	0.849194	yes	DOWN	N	N	N	Y	Y	14.8	4.52
ENSRNOG00000020923.L01	365864	Tuft1	tuftelin 1 [Source:RGD Symbol;Acc:1310373]	39.9	14.6	-1.45	0.0475	0.849194	yes	DOWN	N	N	N	Y	Y	43.09	13.56
ENSRNOG00000018646	25433	Hbegf	heparin-binding EGF-like growth factor [Source:RGD Symbol;Acc:2526]	16.4	5.11	-1.69	0.04755	0.849194	yes	DOWN	N	N	N	Y	Y	17.75	4.75
ENSRNOG00000019100.L01	171529	Kif2c	kinesin family member 2C [Source:RGD Symbol;Acc:620239]	2.97	0.433	-2.78	0.0478	0.849194	yes	DOWN	N	N	N	Y	Y	3.2	0.4
ENSRNOG00000020470.L01	310791	Slc25a24	solute carrier family 25 (mitochondrial carrier, phosphate carrier), member 24 [Source:RGD Symbol;Acc:1311982]	17.9	6.49	-1.46	0.0478	0.849194	yes	DOWN	N	N	N	Y	Y	19.32	6.05
ENSRNOG00000007876.L01	300834	Wdr72	WD repeat domain 72 [Source:RGD Symbol;Acc:1563550]	6	1.84	-1.71	0.0479	0.849194	yes	DOWN	N	N	N	Y	Y	6.48	1.71
ENSRNOG00000011502	100910741	Col9a2	collagen, type IX, alpha 2 [Source:RGD Symbol;Acc:1307029]	26.7	10.4	-1.37	0.04795	0.849194	yes	DOWN	N	N	N	Y	Y	28.9	9.63
ENSRNOG00000034177.L01	116683	Efna5	ephrin A5 [Source:RGD Symbol;Acc:620391]	5.82	1.56	-1.9	0.04805	0.849194	yes	DOWN	N	N	N	Y	Y	6.29	1.46
ENSRNOG00000006845.L01	289720	Psapl1	prosaposin-like 1 [Source:RGD Symbol;Acc:1307368]	27.8	5.04	-2.47	0.0486	0.850366	yes	DOWN	N	N	N	Y	Y	30.11	4.69
ENSRNOG00000014960.L01	64557	Bard1	BRCA1 associated RING domain 1 [Source:RGD Symbol;Acc:621072]	1.72	0.297	-2.53	0.04885	0.850366	yes	DOWN	N	N	N	Y	Y	1.86	0.28
ENSRNOG00000008855	394266	Gjb2	gap junction protein, beta 2 [Source:RGD Symbol;Acc:728891]	25.7	10.1	-1.36	0.04885	0.850366	yes	DOWN	N	N	N	Y	Y	27.8	9.37
ENSRNOG00000036790.L01	361621	Olfml1	olfactomedin-like 1 [Source:RGD Symbol;Acc:1311854]	11.7	4.08	-1.51	0.049	0.850366	yes	DOWN	N	N	N	Y	Y	12.59	3.8
ENSRNOG00000014130	498709	LOC100362620	CDC28 protein kinase regulatory subunit 2 [Source:RGD Symbol;Acc:2324338]	25	5.65	-2.15	0.0495	0.850366	yes	DOWN	N	N	N	Y	Y	27.05	5.26
ENSRNOG00000047736	64358	Kcna6	potassium voltage gated channel, shaker related subfamily, member 6 [Source:RGD Symbol;Acc:62083]	1.1	0.157	-2.81	0.0499	0.852449	yes	DOWN	N	N	N	Y	Y	1.18	0.15
ENSRNOG00000006471.L01	25269	Pvalb	parvalbumin [Source:RGD Symbol;Acc:3457]	6.57	1290	7.61	5e-05	0.0726033	yes	UP	N	Y	Y	Y	Y	7.1	1198.44
ENSRNOG00000003336.L01	83708	Mybph	myosin binding protein H [Source:RGD Symbol;Acc:620287]	9.69	67.4	2.8	5e-05	0.0726033	yes	UP	N	Y	Y	Y	Y	10.47	62.66
ENSRNOG00000015086.L01	25629	Plin1	perilipin 1 [Source:RGD Symbol;Acc:3351]	0	0.995	inf	0.0002	0.155579	yes	UP	N	N	Y	Y	Y	0	0.93
ENSRNOG00000014652	29172	Aqp8	aquaporin 8 [Source:RGD Symbol;Acc:2146]	0	1.38	inf	0.0002	0.155579	yes	UP	N	N	Y	Y	Y	0	1.28
ENSRNOG00000011754.L01	306616	Myom2	myomesin 2 [Source:RGD Symbol;Acc:631437]	4.7	35	2.89	0.0003	0.21781	yes	UP	N	N	Y	Y	Y	5.08	32.55
ENSRNOG00000019627.L01	292879	Mybpc2	myosin binding protein C, fast-type [Source:RGD Symbol;Acc:1311596]	10.2	132	3.7	0.0005	0.258627	yes	UP	N	N	Y	Y	Y	10.99	122.77
ENSRNOG00000007574.L01	29511	Padi2	peptidyl arginine deiminase, type II [Source:RGD Symbol;Acc:3288]	4.79	33.9	2.82	0.00055	0.258627	yes	UP	N	N	Y	Y	Y	5.18	31.52
ENSRNOG00000007999	286965	Abra	actin-binding Rho activating protein [Source:RGD Symbol;Acc:708493]	10.3	58.2	2.49	0.00055	0.258627	yes	UP	N	N	Y	Y	Y	11.16	54.09
ENSRNOG00000008235.L01	117558	Mylk2	myosin light chain kinase 2 [Source:RGD Symbol;Acc:620934]	4.87	32.2	2.73	0.00065	0.258627	yes	UP	N	N	Y	Y	Y	5.26	29.94
ENSRNOG00000013034	361003	Dupd1	dual specificity phosphatase and pro isomerase domain containing 1 [Source:RGD Symbol;Acc:1310229]	2.19	45.6	4.38	0.00105	0.258627	yes	UP	N	N	Y	Y	Y	2.37	42.42
ENSRNOG00000008001	81755	Rab3b	RAB3B, member RAS oncogene family [Source:RGD Symbol;Acc:620922]	1.97	41.7	4.41	0.0011	0.258627	yes	UP	N	N	Y	Y	Y	2.13	38.82
ENSRNOG00000019213	60666	Gpd1	glycerol-3-phosphate dehydrogenase 1 (soluble) [Source:RGD Symbol;Acc:621381]	10.3	60.2	2.55	0.00115	0.258627	yes	UP	N	N	Y	Y	Y	11.13	55.98
ENSRNOG00000048169.L01	500377	Tuba8	tubulin, alpha 8 [Source:RGD Symbol;Acc:1566041]	15.8	86.6	2.45	0.0013	0.258627	yes	UP	N	N	Y	Y	Y	17.09	80.57
ENSRNOG00000018598	27064	Ankrd1	ankyrin repeat domain 1 [Source:RGD Symbol;Acc:61989]	13.9	81.1	2.54	0.00135	0.258627	yes	UP	N	N	Y	Y	Y	15.05	75.51
ENSRNOG00000008210.L01	315962	Ky	kyphoscoliosis peptidase [Source:RGD Symbol;Acc:1305407]	6.28	33.8	2.43	0.0014	0.258627	yes	UP	N	N	Y	Y	Y	6.79	31.49
ENSRNOG00000011518	501718	Dusp26	dual specificity phosphatase 26 (putative) [Source:RGD Symbol;Acc:1310090]	4.86	42.1	3.11	0.00145	0.258627	yes	UP	N	N	Y	Y	Y	5.26	39.13
ENSRNOG00000016603.L01	308410	Rtn2	reticulon 2 [Source:RGD Symbol;Acc:1303245]	51.2	261	2.35	0.00205	0.258627	yes	UP	N	N	Y	Y	Y	55.4	242.94
ENSRNOG00000017716.L01	25708	Ucp3	uncoupling protein 3 (mitochondrial, proton carrier) [Source:RGD Symbol;Acc:3933]	10.3	51.6	2.33	0.0022	0.258627	yes	UP	N	N	Y	Y	Y	11.1	48.05
ENSRNOG00000018978.L01	293591	Cd163l1	CD163 molecule-like 1 [Source:RGD Symbol;Acc:1307378]	3.17	20.9	2.72	0.0023	0.258627	yes	UP	N	N	Y	Y	Y	3.43	19.47
ENSRNOG00000012879	79131	Fabp3	fatty acid binding protein 3, muscle and heart [Source:RGD Symbol;Acc:69048]	128	799	2.64	0.0026	0.258627	yes	UP	N	N	Y	Y	Y	138.58	743.08
ENSRNOG00000037451.L01	100912735	LOC100912735	uncharacterized LOC100912735 [Source:RGD Symbol;Acc:6485680]	0	43.5	inf	0.0026	0.258627	yes	UP	N	N	Y	Y	Y	0	40.37
ENSRNOG00000036827	58977	Ppp1r1a	protein phosphatase 1, regulatory (inhibitor) subunit 1A [Source:RGD Symbol;Acc:62018]	4.32	26.7	2.63	0.0032	0.258627	yes	UP	N	N	Y	Y	Y	4.67	24.84
ENSRNOG00000019019	290223	Fitm1	fat storage-inducing transmembrane protein 1 [Source:RGD Symbol;Acc:1306911]	24.1	116	2.27	0.00325	0.258627	yes	UP	N	N	Y	Y	Y	26.09	108.36
ENSRNOG00000032951	690423	Jsrp1	junctional sarcoplasmic reticulum protein 1 [Source:RGD Symbol;Acc:1596084]	31.7	136	2.1	0.00345	0.258627	yes	UP	N	N	Y	Y	Y	34.3	126.44
ENSRNOG00000046377.L01	684480	LOC684480	similar to butyrophilin 3 [Source:RGD Symbol;Acc:1590287]	1.62	13	3	0.0039	0.258627	yes	UP	N	N	Y	Y	Y	1.76	12.09
ENSRNOG00000028456.L01	287819	Ush1g	Usher syndrome 1G [Source:RGD Symbol;Acc:1304551]	0	0.683	inf	0.00405	0.258627	yes	UP	N	N	Y	Y	Y	0	0.63
ENSRNOG00000010805.L01	79451	Fabp4	fatty acid binding protein 4, adipocyte [Source:RGD Symbol;Acc:69309]	137	671	2.29	0.0041	0.258627	yes	UP	N	N	Y	Y	Y	147.75	623.92
ENSRNOG00000008609.L01	29155	Capn3	calpain 3 [Source:RGD Symbol;Acc:2269]	7.61	39.1	2.36	0.00415	0.258627	yes	UP	N	N	Y	Y	Y	8.22	36.35
ENSRNOG00000011177	50683	Sftpc	surfactant protein C [Source:RGD Symbol;Acc:3666]	0	1.86	inf	0.0044	0.258627	yes	UP	N	N	Y	Y	Y	0	1.73
ENSRNOG00000026548	287411	Dhrs7c	dehydrogenase/reductase (SDR family) member 7C [Source:RGD Symbol;Acc:1306989]	56	249	2.15	0.0044	0.258627	yes	UP	N	N	Y	Y	Y	60.54	231.58
ENSRNOG00000047662	292855	Klk1c12	kallikrein 1-related peptidase C12 [Source:RGD Symbol;Acc:1303192]	0	1.95	inf	0.0044	0.258627	yes	UP	N	N	Y	Y	Y	0	1.81
ENSRNOG00000000606.L01	690865	Pcdh15	protocadherin 15 [Source:RGD Symbol;Acc:1590969]	0.051	0.726	3.83	0.0045	0.258627	yes	UP	N	N	Y	Y	Y	0.06	0.67
ENSRNOG00000003998.L01	303468	Sgca	sarcoglycan, alpha (dystrophin-associated glycoprotein) [Source:RGD Symbol;Acc:1308062]	24.2	91.5	1.92	0.00475	0.258627	yes	UP	N	N	Y	Y	Y	26.17	85.14
ENSRNOG00000004518.L01	50688	Cacnb1	calcium channel, voltage-dependent, beta 1 subunit [Source:RGD Symbol;Acc:68382]	3.93	17.6	2.16	0.0049	0.258627	yes	UP	N	N	Y	Y	Y	4.25	16.33
ENSRNOG00000003245	29658	Cacng1	calcium channel, voltage-dependent, gamma subunit 1 [Source:RGD Symbol;Acc:2249]	15	64.3	2.1	0.00515	0.258627	yes	UP	N	N	Y	Y	Y	16.2	59.85
ENSRNOG00000018241.L01	306570	Ank1	ankyrin 1, erythrocytic [Source:RGD Symbol;Acc:1309620]	33.1	154	2.21	0.0052	0.258627	yes	UP	N	N	Y	Y	Y	35.81	143.09
ENSRNOG00000016543.L01	140939	Trim63	tripartite motif containing 63, E3 ubiquitin protein ligase [Source:RGD Symbol;Acc:619964]	15.2	71.5	2.23	0.00555	0.258627	yes	UP	N	N	Y	Y	Y	16.46	66.44
ENSRNOG00000007540	312897	Msc	musculin [Source:RGD Symbol;Acc:1305496]	0	2.02	inf	0.0057	0.258627	yes	UP	N	N	Y	Y	Y	0	1.88
ENSRNOG00000028548	360579	Ccl9	chemokine (C-C motif) ligand 9 [Source:RGD Symbol;Acc:1310563]	0	0.684	inf	0.0057	0.258627	yes	UP	N	N	Y	Y	Y	0	0.64
ENSRNOG00000021027.L01	24309	Dbp	D site of albumin promoter (albumin D-box) binding protein [Source:RGD Symbol;Acc:2491]	18.1	108	2.58	0.0059	0.258627	yes	UP	N	N	Y	Y	Y	19.56	100.43
ENSRNOG00000014326.L01	140727	Cacng6	calcium channel, voltage-dependent, gamma subunit 6 [Source:RGD Symbol;Acc:628806]	2.44	14.4	2.56	0.00625	0.258627	yes	UP	N	N	Y	Y	Y	2.64	13.38
ENSRNOG00000024181	54271	Tpsab1	tryptase alpha/beta 1 [Source:RGD Symbol;Acc:3066]	0	0.836	inf	0.00635	0.258627	yes	UP	N	N	Y	Y	Y	0	0.78
ENSRNOG00000006931.L01	315500	Eepd1	endonuclease/exonuclease/phosphatase family domain containing 1 [Source:RGD Symbol;Acc:1307401]	8.26	33.8	2.03	0.0064	0.258627	yes	UP	N	N	Y	Y	Y	8.93	31.45
ENSRNOG00000030462	360730	Ostn	osteocrin [Source:RGD Symbol;Acc:1303110]	0	0.908	inf	0.00645	0.258627	yes	UP	N	N	Y	Y	Y	0	0.85
ENSRNOG00000007628	362930	Ptp4a3	protein tyrosine phosphatase type IVA, member 3 [Source:RGD Symbol;Acc:1308687]	58.8	268	2.19	0.00645	0.258627	yes	UP	N	N	Y	Y	Y	63.57	248.95
ENSRNOG00000038625.L01	691411	Sbk2	SH3 domain binding kinase family, member 2 [Source:RGD Symbol;Acc:1563279]	12.7	48.3	1.92	0.00645	0.258627	yes	UP	N	N	Y	Y	Y	13.74	44.92
ENSRNOG00000014641	287122	Rpl3l	ribosomal protein L3-like [Source:RGD Symbol;Acc:1306315]	69.4	296	2.09	0.00665	0.258627	yes	UP	N	N	Y	Y	Y	75	274.87
ENSRNOG00000002256	305235	Art3	ADP-ribosyltransferase 3 [Source:RGD Symbol;Acc:628833]	28.5	121	2.09	0.00665	0.258627	yes	UP	N	N	Y	Y	Y	30.77	112.62
ENSRNOG00000005491.L01	314847	Best3	bestrophin 3 [Source:RGD Symbol;Acc:1305439]	0.524	3.31	2.66	0.00665	0.258627	yes	UP	N	N	Y	Y	Y	0.57	3.08
ENSRNOG00000021174	246233	Macrod1	MACRO domain containing 1 [Source:RGD Symbol;Acc:628701]	54.7	227	2.05	0.0069	0.258627	yes	UP	N	N	Y	Y	Y	59.22	210.61
ENSRNOG00000028656.L01	301521	Ccdc108	coiled-coil domain containing 108 [Source:RGD Symbol;Acc:1563002]	3.79	16.6	2.13	0.0073	0.258627	yes	UP	N	N	Y	Y	Y	4.1	15.42
ENSRNOG00000004537.L01	83574	Rxrg	retinoid X receptor gamma [Source:RGD Symbol;Acc:620046]	5.25	25.9	2.3	0.0075	0.262633	yes	UP	N	N	Y	Y	Y	5.68	24.12
ENSRNOG00000006663.L01	115771	Usp2	ubiquitin specific peptidase 2 [Source:RGD Symbol;Acc:621073]	5.56	23	2.05	0.00775	0.268794	yes	UP	N	N	Y	Y	Y	6.01	21.37
ENSRNOG00000006146	362708	Trim54	tripartite motif-containing 54 [Source:RGD Symbol;Acc:1306453]	54.8	201	1.88	0.00825	0.279027	yes	UP	N	N	Y	Y	Y	59.27	187.13
ENSRNOG00000008847.L01	79217	Gja3	gap junction protein, alpha 3 [Source:RGD Symbol;Acc:621820]	1.81	11.6	2.68	0.0084	0.28366	yes	UP	N	N	Y	Y	Y	1.95	10.79
ENSRNOG00000048797.L01	25350	Sftpd	surfactant protein D [Source:RGD Symbol;Acc:3667]	25.6	105	2.04	0.0085	0.285708	yes	UP	N	N	Y	Y	Y	27.69	97.65
ENSRNOG00000028356	361824	Chchd10	coiled-coil-helix-coiled-coil-helix domain containing 10 [Source:RGD Symbol;Acc:1359417]	187	973	2.38	0.00855	0.286945	yes	UP	N	N	Y	Y	Y	202.66	904.56
ENSRNOG00000008170.L01	296345	Jph2	junctophilin 2 [Source:RGD Symbol;Acc:1305196]	13	53.8	2.05	0.00905	0.301865	yes	UP	N	N	Y	Y	Y	14.08	50.05
ENSRNOG00000026493.L01	361276	Cdnf	cerebral dopamine neurotrophic factor [Source:RGD Symbol;Acc:1307600]	4	17.2	2.11	0.0092	0.306399	yes	UP	N	N	Y	Y	Y	4.32	16.02
ENSRNOG00000018656.L01	25028	Ampd1	adenosine monophosphate deaminase 1 [Source:RGD Symbol;Acc:2109]	29.1	134	2.2	0.00925	0.307125	yes	UP	N	N	Y	Y	Y	31.45	124.56
ENSRNOG00000047860.L01	501283	Plin5	perilipin 5 [Source:RGD Symbol;Acc:1589602]	4.44	21	2.25	0.00925	0.307125	yes	UP	N	N	Y	Y	Y	4.8	19.56
ENSRNOG00000021200	310681	Hfe2	hemochromatosis type 2 (juvenile) [Source:RGD Symbol;Acc:1310195]	39.9	166	2.06	0.0093	0.307847	yes	UP	N	N	Y	Y	Y	43.12	154.21
ENSRNOG00000002753.L01	360638	Adam11	ADAM metallopeptidase domain 11 [Source:RGD Symbol;Acc:1307515]	14.9	67.6	2.18	0.0094	0.310214	yes	UP	N	N	Y	Y	Y	16.15	62.94
ENSRNOG00000032150	81636	Adcy2	adenylate cyclase 2 (brain) [Source:RGD Symbol;Acc:619965]	9.92	37.8	1.93	0.0095	0.311626	yes	UP	N	N	Y	Y	Y	10.72	35.18
ENSRNOG00000002721	691675	LOC688963	similar to NADH dehydrogenase (ubiquinone) 1 beta subcomplex, 4, 15kDa [Source:RGD Symbol;Acc:1582944]	181	633	1.8	0.0095	0.311626	yes	UP	N	N	Y	Y	Y	196.21	588.65
ENSRNOG00000046834.L01	24232	C3	complement component 3 [Source:RGD Symbol;Acc:2232]	5.22	18.2	1.81	0.0096	0.314432	yes	UP	N	N	Y	Y	Y	5.64	16.96
ENSRNOG00000010068.L01	296635	Ppapdc3	phosphatidic acid phosphatase type 2 domain containing 3 [Source:RGD Symbol;Acc:1305821]	12.6	54.3	2.11	0.00965	0.314651	yes	UP	N	N	Y	Y	Y	13.57	50.53
ENSRNOG00000009889	24645	Pgm1	phosphoglucomutase 1 [Source:RGD Symbol;Acc:3316]	30	125	2.06	0.01025	0.33272	yes	UP	N	N	N	Y	Y	32.43	116.7
ENSRNOG00000046231.L01	682930	Cacna1s	calcium channel, voltage-dependent, L type, alpha 1S subunit [Source:RGD Symbol;Acc:70983]	20.7	89.3	2.11	0.0104	0.337087	yes	UP	N	N	N	Y	Y	22.41	83.04
ENSRNOG00000016062.L01	362242	Snta1	syntrophin, alpha 1 [Source:RGD Symbol;Acc:1307068]	18.2	65.5	1.84	0.01115	0.358198	yes	UP	N	N	N	Y	Y	19.72	60.9
ENSRNOG00000007407	100910710	Ndufa12	NADH dehydrogenase (ubiquinone) 1 alpha subcomplex, 12 [Source:RGD Symbol;Acc:1311462]	185	687	1.89	0.0114	0.364081	yes	UP	N	N	N	Y	Y	200.27	639
ENSRNOG00000012443.L01	25413	Cpt2	carnitine palmitoyltransferase 2 [Source:RGD Symbol;Acc:2398]	18.5	63.1	1.77	0.01165	0.370436	yes	UP	N	N	N	Y	Y	19.97	58.67
ENSRNOG00000021088.L01	295261	Tmod4	tropomodulin 4 [Source:RGD Symbol;Acc:1308940]	51.5	232	2.17	0.0117	0.371484	yes	UP	N	N	N	Y	Y	55.65	215.78
ENSRNOG00000019745.L01	171009	Actn3	actinin alpha 3 [Source:RGD Symbol;Acc:621792]	0.658	198	8.23	0.0119	0.376189	yes	UP	N	N	N	Y	Y	0.71	183.86
ENSRNOG00000003011	288916	Gadd45gip1	growth arrest and DNA-damage-inducible, gamma interacting protein 1 [Source:RGD Symbol;Acc:1309249]	33.7	116	1.79	0.0121	0.380853	yes	UP	N	N	N	Y	Y	36.48	108.02
ENSRNOG00000003273.L01	360604	Spata20	spermatogenesis associated 20 [Source:RGD Symbol;Acc:735087]	0.592	4.95	3.06	0.0121	0.380853	yes	UP	N	N	N	Y	Y	0.64	4.6
ENSRNOG00000013468.L01	362676	Fam213b	family with sequence similarity 213, member B [Source:RGD Symbol;Acc:1308251]	11.4	62.1	2.45	0.01215	0.381324	yes	UP	N	N	N	Y	Y	12.3	57.81
ENSRNOG00000008050.L01	362895	Stac3	SH3 and cysteine rich domain 3 [Source:RGD Symbol;Acc:1308964]	23.9	94.7	1.98	0.01215	0.381324	yes	UP	N	N	N	Y	Y	25.87	88.05
ENSRNOG00000019780	362018	Sypl2	synaptophysin-like 2 [Source:RGD Symbol;Acc:1309907]	20.9	74.6	1.83	0.01225	0.383358	yes	UP	N	N	N	Y	Y	22.63	69.42
ENSRNOG00000014867.L01	499702	Synpo2	synaptopodin 2 [Source:RGD Symbol;Acc:1564779]	11.4	40.8	1.83	0.0123	0.384371	yes	UP	N	N	N	Y	Y	12.36	37.93
ENSRNOG00000001177	64304	Acads	acyl-CoA dehydrogenase, C-2 to C-3 short chain [Source:RGD Symbol;Acc:620514]	32.9	108	1.72	0.01255	0.38939	yes	UP	N	N	N	Y	Y	35.59	100.82
ENSRNOG00000019390.L01	316088	Klhl40	kelch-like family member 40 [Source:RGD Symbol;Acc:1305368]	20.2	65.9	1.71	0.01275	0.394471	yes	UP	N	N	N	Y	Y	21.81	61.25
ENSRNOG00000028900.L01	24299	Cyp2a3	cytochrome P450, family 2, subfamily a, polypeptide 3 [Source:RGD Symbol;Acc:2465]	47.4	178	1.91	0.01285	0.397001	yes	UP	N	N	N	Y	Y	51.19	165.86
ENSRNOG00000015718.L01	300990	RGD1307461	similar to RIKEN cDNA 6430571L13 gene; similar to g20 protein [Source:RGD Symbol;Acc:1307461]	3.02	12.8	2.09	0.01295	0.398395	yes	UP	N	N	N	Y	Y	3.27	11.94
ENSRNOG00000048961.L01	117095	Bhlhe41	basic helix-loop-helix family, member e41 [Source:RGD Symbol;Acc:70900]	3.04	11.2	1.88	0.01305	0.400906	yes	UP	N	N	N	Y	Y	3.29	10.41
ENSRNOG00000018145	311849	Crat	carnitine O-acetyltransferase [Source:RGD Symbol;Acc:1303031]	51.8	210	2.02	0.0131	0.401875	yes	UP	N	N	N	Y	Y	56.01	195.29
ENSRNOG00000005659.L01	114592	Aurkb	aurora kinase B [Source:RGD Symbol;Acc:621625]	23.4	105	2.17	0.0133	0.406864	yes	UP	N	N	N	Y	Y	25.24	98.07
ENSRNOG00000020992	140927	Selenbp1	selenium binding protein 1 [Source:RGD Symbol;Acc:620571]	18.9	61.9	1.71	0.0134	0.408203	yes	UP	N	N	N	Y	Y	20.41	57.57
ENSRNOG00000000383.L01	309760	Mypn	myopalladin [Source:RGD Symbol;Acc:1308510]	10.7	36.7	1.78	0.01345	0.409154	yes	UP	N	N	N	Y	Y	11.52	34.15
ENSRNOG00000050675	688228	Myl4	myosin, light chain 4 [Source:RGD Symbol;Acc:1591197]	8.62	48.7	2.5	0.01375	0.416535	yes	UP	N	N	N	Y	Y	9.31	45.28
ENSRNOG00000019926.L01	58965	Ramp1	receptor (G protein-coupled) activity modifying protein 1 [Source:RGD Symbol;Acc:61870]	38	128	1.75	0.0138	0.417469	yes	UP	N	N	N	Y	Y	41.04	119.14
ENSRNOG00000018611	29268	Tpsb2	tryptase beta 2 [Source:RGD Symbol;Acc:3065]	2.69	20.9	2.95	0.01385	0.417821	yes	UP	N	N	N	Y	Y	2.91	19.42
ENSRNOG00000002303.L01	117052	Kcnj12	potassium inwardly-rectifying channel, subfamily J, member 12 [Source:RGD Symbol;Acc:621660]	3.39	13.5	1.99	0.014	0.421762	yes	UP	N	N	N	Y	Y	3.66	12.53
ENSRNOG00000015290	100911515	Tpi1	triosephosphate isomerase 1 [Source:RGD Symbol;Acc:3896]	93.3	388	2.05	0.01405	0.422684	yes	UP	N	N	N	Y	Y	100.86	360.75
ENSRNOG00000006930.L01	686019	Casq1	calsequestrin 1 (fast-twitch, skeletal muscle) [Source:RGD Symbol;Acc:1586677]	82.1	464	2.5	0.01415	0.425105	yes	UP	N	N	N	Y	Y	88.75	431.54
ENSRNOG00000017311.L01	361602	Me3	malic enzyme 3, NADP(+)-dependent, mitochondrial [Source:RGD Symbol;Acc:1311070]	8.7	35.7	2.04	0.0148	0.43978	yes	UP	N	N	N	Y	Y	9.4	33.18
ENSRNOG00000012181	24539	Lpl	lipoprotein lipase [Source:RGD Symbol;Acc:3017]	23.9	86	1.85	0.0149	0.441547	yes	UP	N	N	N	Y	Y	25.83	80.06
ENSRNOG00000019057.L01	85420	Prkcq	protein kinase C, theta [Source:RGD Symbol;Acc:620968]	5.33	17.7	1.73	0.0149	0.441547	yes	UP	N	N	N	Y	Y	5.76	16.45
ENSRNOG00000019404.L02	301073	Hhatl	hedgehog acyltransferase-like [Source:RGD Symbol;Acc:1311911]	31.9	138	2.12	0.01505	0.444782	yes	UP	N	N	N	Y	Y	34.47	128.59
ENSRNOG00000014698	24261	Chrnb1	cholinergic receptor, nicotinic, beta 1 (muscle) [Source:RGD Symbol;Acc:2349]	8.28	29	1.81	0.0151	0.445655	yes	UP	N	N	N	Y	Y	8.94	26.97
ENSRNOG00000009012.L01	100909439	Asb2	ankyrin repeat and SOCS box-containing 2 [Source:RGD Symbol;Acc:1306414]	25.3	90.3	1.83	0.0152	0.44679	yes	UP	N	N	N	Y	Y	27.4	83.95
ENSRNOG00000037435.L01	500750	Tmem196	transmembrane protein 196 [Source:RGD Symbol;Acc:1562527]	1.57	8.87	2.5	0.01525	0.447655	yes	UP	N	N	N	Y	Y	1.69	8.27
ENSRNOG00000005690	494021	Lmcd1	LIM and cysteine-rich domains 1 [Source:RGD Symbol;Acc:1308963]	13.7	44.1	1.69	0.01555	0.453406	yes	UP	N	N	N	Y	Y	14.76	41
ENSRNOG00000020602	100911483	Ndufa13	NADH dehydrogenase (ubiquinone) 1 alpha subcomplex, 13 [Source:RGD Symbol;Acc:1565358]	232	772	1.73	0.01585	0.459692	yes	UP	N	N	N	Y	Y	251.19	717.91
ENSRNOG00000018651.L01	290986	Agtpbp1	ATP/GTP binding protein 1 [Source:RGD Symbol;Acc:1306307]	6.6	23.2	1.81	0.0163	0.469617	yes	UP	N	N	N	Y	Y	7.13	21.55
ENSRNOG00000020339.L01	309459	Neurl1	neuralized E3 ubiquitin protein ligase 1 [Source:RGD Symbol;Acc:1307021]	3.58	12.6	1.81	0.01645	0.473312	yes	UP	N	N	N	Y	Y	3.87	11.67
ENSRNOG00000024309.L01	688869	Cox6b1	cytochrome c oxidase subunit VIb polypeptide 1 [Source:RGD Symbol;Acc:1584097]	80.3	281	1.81	0.01665	0.475923	yes	UP	N	N	N	Y	Y	86.75	261.2
ENSRNOG00000031249.L01	80900	Slco1a2	solute carrier organic anion transporter family, member 1A2 [Source:RGD Symbol;Acc:70985]	5.06	19.7	1.96	0.0174	0.486508	yes	UP	N	N	N	Y	Y	5.47	18.34
ENSRNOG00000021128.L01	83535	Kcnj11	potassium inwardly rectifying channel, subfamily J, member 11 [Source:RGD Symbol;Acc:69247]	7.6	26.3	1.79	0.0177	0.493628	yes	UP	N	N	N	Y	Y	8.22	24.48
ENSRNOG00000027489.L01	498194	Mn1	meningioma 1 [Source:RGD Symbol;Acc:1565571]	4.64	14.2	1.61	0.01825	0.506374	yes	UP	N	N	N	Y	Y	5.02	13.2
ENSRNOG00000021102.L01	29686	Scn1b	sodium channel, voltage-gated, type I, beta subunit [Source:RGD Symbol;Acc:3631]	106	393	1.9	0.0188	0.514426	yes	UP	N	N	N	Y	Y	114.28	365.9
ENSRNOG00000027791	688386	Cox7a2	cytochrome c oxidase subunit VIIa polypeptide 2 [Source:RGD Symbol;Acc:68365]	106	337	1.67	0.0188	0.514426	yes	UP	N	N	N	Y	Y	114.49	313.47
ENSRNOG00000018415	291135	Acot13	acyl-CoA thioesterase 13 [Source:RGD Symbol;Acc:1306513]	32.3	109	1.75	0.019	0.518595	yes	UP	N	N	N	Y	Y	34.9	101.24
ENSRNOG00000007896.L01	314996	Klhl38	kelch-like family member 38 [Source:RGD Symbol;Acc:1564169]	4.03	15.2	1.92	0.01925	0.524105	yes	UP	N	N	N	Y	Y	4.36	14.17
ENSRNOG00000012134.L01	25722	Scn4a	sodium channel, voltage-gated, type IV, alpha subunit [Source:RGD Symbol;Acc:3636]	7.32	27.1	1.89	0.0193	0.524811	yes	UP	N	N	N	Y	Y	7.91	25.2
ENSRNOG00000024616	100910713	Tsc22d4	TSC22 domain family, member 4 [Source:RGD Symbol;Acc:1584380]	16.6	51.7	1.64	0.0198	0.535067	yes	UP	N	N	N	Y	Y	17.93	48.11
ENSRNOG00000008481.L01	362384	Reep1	receptor accessory protein 1 [Source:RGD Symbol;Acc:1305230]	4.6	16.3	1.83	0.02	0.538467	yes	UP	N	N	N	Y	Y	4.97	15.2
ENSRNOG00000015976	688682	Snrpn	small nuclear ribonucleoprotein polypeptide N [Source:RGD Symbol;Acc:621306]	12.1	38.4	1.66	0.02025	0.541184	yes	UP	N	N	N	Y	Y	13.12	35.75
ENSRNOG00000008236	117543	Decr1	2,4-dienoyl CoA reductase 1, mitochondrial [Source:RGD Symbol;Acc:70999]	48.4	145	1.58	0.0204	0.543859	yes	UP	N	N	N	Y	Y	52.28	135.13
ENSRNOG00000037199.L01	301016	Spink8	serine peptidase inhibitor, Kazal type 8 [Source:RGD Symbol;Acc:1307150]	4.58	43.7	3.25	0.0204	0.543859	yes	UP	N	N	N	Y	Y	4.95	40.69
ENSRNOG00000026646.L01	100363268	LOC100361505	rCG31129-like [Source:RGD Symbol;Acc:2319962]	56.9	190	1.74	0.02095	0.553085	yes	UP	N	N	N	Y	Y	61.53	176.75
ENSRNOG00000007069.L01	362474	Adhfe1	alcohol dehydrogenase, iron containing, 1 [Source:RGD Symbol;Acc:1308863]	12.2	43.1	1.82	0.021	0.553085	yes	UP	N	N	N	Y	Y	13.16	40.12
ENSRNOG00000020484.L01	365391	Trpm5	transient receptor potential cation channel, subfamily M, member 5 [Source:RGD Symbol;Acc:1310620]	4.23	13.8	1.71	0.021	0.553085	yes	UP	N	N	N	Y	Y	4.57	12.86
ENSRNOG00000027230.L01	100360334	Fhod3	formin homology 2 domain containing 3 [Source:RGD Symbol;Acc:2322319]	2.66	9.68	1.86	0.0212	0.554972	yes	UP	N	N	N	Y	Y	2.87	9
ENSRNOG00000004878	25714	Myf6	myogenic factor 6 [Source:RGD Symbol;Acc:3134]	17.9	53.2	1.57	0.02155	0.56146	yes	UP	N	N	N	Y	Y	19.31	49.55
ENSRNOG00000020779.L01	365241	Kcna7	potassium voltage-gated channel, shaker-related subfamily, member 7 [Source:RGD Symbol;Acc:1309632]	7.86	23.4	1.57	0.02185	0.56388	yes	UP	N	N	N	Y	Y	8.5	21.74
ENSRNOG00000029571.L02	362810	Coq10a	coenzyme Q10 homolog A (S. cerevisiae) [Source:RGD Symbol;Acc:1562447]	46.8	166	1.83	0.022	0.566409	yes	UP	N	N	N	Y	Y	50.62	154.86
ENSRNOG00000018989.L01	291180	Epdr1	ependymin related 1 [Source:RGD Symbol;Acc:1359161]	8.99	30.9	1.78	0.02225	0.57009	yes	UP	N	N	N	Y	Y	9.7	28.81
ENSRNOG00000019850.L01	363256	Speg	SPEG complex locus [Source:RGD Symbol;Acc:2124]	8.31	25.7	1.63	0.0223	0.57009	yes	UP	N	N	N	Y	Y	8.98	23.9
ENSRNOG00000014522.L01	85239	Mlycd	malonyl-CoA decarboxylase [Source:RGD Symbol;Acc:620234]	20.2	60.9	1.59	0.0228	0.580065	yes	UP	N	N	N	Y	Y	21.87	56.6
ENSRNOG00000021380.L01	303671	Fads6	fatty acid desaturase 6 [Source:RGD Symbol;Acc:1311950]	2.46	11.3	2.2	0.0234	0.591957	yes	UP	N	N	N	Y	Y	2.66	10.54
ENSRNOG00000049942.L01	498579	RGD1564899	similar to chromosome 10 open reading frame 71 [Source:RGD Symbol;Acc:1564899]	7.07	22.5	1.67	0.02355	0.593684	yes	UP	N	N	N	Y	Y	7.64	20.94
ENSRNOG00000004005.L01	24245	Camk2b	calcium/calmodulin-dependent protein kinase II beta [Source:RGD Symbol;Acc:2262]	13.3	46.6	1.81	0.0237	0.595966	yes	UP	N	N	N	Y	Y	14.4	43.36
ENSRNOG00000005053	54702	Egln3	egl-9 family hypoxia-inducible factor 3 [Source:RGD Symbol;Acc:71019]	11.6	35	1.6	0.02375	0.595966	yes	UP	N	N	N	Y	Y	12.49	32.58
ENSRNOG00000048862.L01	294696	Mrps36	mitochondrial ribosomal protein S36 [Source:RGD Symbol;Acc:1309315]	54.7	165	1.6	0.0238	0.596534	yes	UP	N	N	N	Y	Y	59.03	154.17
ENSRNOG00000012659	89818	Vamp5	vesicle-associated membrane protein 5 [Source:RGD Symbol;Acc:620419]	31.8	99.4	1.64	0.0239	0.598352	yes	UP	N	N	N	Y	Y	34.38	92.42
ENSRNOG00000047118.L01	683897	LOC683897	similar to Protein C6orf203 [Source:RGD Symbol;Acc:1597785]	18.1	59.4	1.71	0.02405	0.601416	yes	UP	N	N	N	Y	Y	19.58	55.27
ENSRNOG00000011825	100361144	LOC100361144	NADH dehydrogenase (ubiquinone) 1 beta subcomplex 3-like [Source:RGD Symbol;Acc:2320717]	169	572	1.76	0.02415	0.602533	yes	UP	N	N	N	Y	Y	182.8	531.87
ENSRNOG00000002994.L01	360718	Popdc2	popeye domain containing 2 [Source:RGD Symbol;Acc:735226]	3.04	11.1	1.87	0.0242	0.603089	yes	UP	N	N	N	Y	Y	3.29	10.32
ENSRNOG00000006420.L01	366262	Rbm38	RNA binding motif protein 38 [Source:RGD Symbol;Acc:1308503]	23.5	74.3	1.66	0.0243	0.60351	yes	UP	N	N	N	Y	Y	25.45	69.09
ENSRNOG00000009686.L01	29171	Aqp7	aquaporin 7 [Source:RGD Symbol;Acc:2145]	0.976	9.14	3.23	0.0245	0.607093	yes	UP	N	N	N	Y	Y	1.05	8.51
ENSRNOG00000013653.L01	286908	Pdlim7	PDZ and LIM domain 7 [Source:RGD Symbol;Acc:628769]	52.3	240	2.2	0.02465	0.609423	yes	UP	N	N	N	Y	Y	56.54	222.65
ENSRNOG00000048320	301123	Ndufa11	NADH dehydrogenase (ubiquinone) 1 alpha subcomplex 11 [Source:RGD Symbol;Acc:1303292]	246	759	1.62	0.02475	0.609525	yes	UP	N	N	N	Y	Y	266.37	706.47
ENSRNOG00000014224	691001	LOC684509	similar to NADH-ubiquinone oxidoreductase B9 subunit (Complex I-B9) (CI-B9) [Source:RGD Symbol;Acc:1589176]	652	1880	1.53	0.02485	0.609525	yes	UP	N	N	N	Y	Y	704.7	1749.02
ENSRNOG00000034161	688869	LOC681754	similar to cytochrome c oxidase, subunit VIb polypeptide 1 [Source:RGD Symbol;Acc:1591649]	126	404	1.68	0.0249	0.610064	yes	UP	N	N	N	Y	Y	135.87	375.59
ENSRNOG00000000701	288740	Iscu	iron-sulfur cluster assembly enzyme [Source:RGD Symbol;Acc:1309562]	43.2	139	1.68	0.0251	0.613584	yes	UP	N	N	N	Y	Y	46.74	129.08
ENSRNOG00000050924.L01	684516	Kcnc4	potassium voltage gated channel, Shaw-related subfamily, member 4 [Source:RGD Symbol;Acc:1589169]	3.61	13.9	1.94	0.02565	0.624925	yes	UP	N	N	N	Y	Y	3.9	12.9
ENSRNOG00000012477.L01	24799	Eef1a2	eukaryotic translation elongation factor 1 alpha 2 [Source:RGD Symbol;Acc:3781]	70.6	282	2	0.02575	0.625961	yes	UP	N	N	N	Y	Y	76.37	261.96
ENSRNOG00000024539	297990	Ndufb6	NADH dehydrogenase (ubiquinone) 1 beta subcomplex, 6 [Source:RGD Symbol;Acc:1311354]	94	259	1.46	0.02585	0.626992	yes	UP	N	N	N	Y	Y	101.64	240.51
ENSRNOG00000028717.L01	361385	Ndufb7	NADH dehydrogenase (ubiquinone) 1 beta subcomplex, 7 [Source:RGD Symbol;Acc:1308550]	243	826	1.77	0.02625	0.631072	yes	UP	N	N	N	Y	Y	262.79	767.89
ENSRNOG00000042653	690871	LOC690871	hypothetical protein LOC690871 [Source:RGD Symbol;Acc:1590963]	87.9	259	1.56	0.0265	0.633391	yes	UP	N	N	N	Y	Y	95.11	240.7
ENSRNOG00000006653.L01	170573	Slc38a4	solute carrier family 38, member 4 [Source:RGD Symbol;Acc:621836]	1.72	7.89	2.2	0.02675	0.637464	yes	UP	N	N	N	Y	Y	1.85	7.34
ENSRNOG00000016660	94194	Cox5b	cytochrome c oxidase subunit Vb [Source:RGD Symbol;Acc:620608]	553	1930	1.8	0.0268	0.637957	yes	UP	N	N	N	Y	Y	598.37	1792.71
ENSRNOG00000006224	315833	Klhl31	kelch-like family member 31 [Source:RGD Symbol;Acc:1560540]	11.5	34.5	1.59	0.027	0.639921	yes	UP	N	N	N	Y	Y	12.41	32.14
ENSRNOG00000009565	89813	Pdk4	pyruvate dehydrogenase kinase, isozyme 4 [Source:RGD Symbol;Acc:69061]	41.6	229	2.46	0.02735	0.641991	yes	UP	N	N	N	Y	Y	44.96	213.32
ENSRNOG00000007235.L01	689961	Atp5g1	ATP synthase, H+ transporting, mitochondrial Fo complex, subunit C1 (subunit 9) [Source:RGD Symbol;Acc:61933]	279	1010	1.85	0.02745	0.641991	yes	UP	N	N	N	Y	Y	301.72	937.95
ENSRNOG00000042419	364224	Acyp2	acylphosphatase 2, muscle type [Source:RGD Symbol;Acc:1595836]	51.2	146	1.51	0.0275	0.641991	yes	UP	N	N	N	Y	Y	55.25	136.05
ENSRNOG00000037815.L01	304500	Acad10	acyl-CoA dehydrogenase family, member 10 [Source:RGD Symbol;Acc:1310159]	8.05	23.6	1.55	0.0278	0.64395	yes	UP	N	N	N	Y	Y	8.7	21.96
ENSRNOG00000009864.L01	362039	Pla2g12a	phospholipase A2, group XIIA [Source:RGD Symbol;Acc:1304662]	26.9	78.5	1.54	0.0278	0.64395	yes	UP	N	N	N	Y	Y	29.09	72.97
ENSRNOG00000009974.L01	29309	Coq3	coenzyme Q3 methyltransferase [Source:RGD Symbol;Acc:2380]	21.8	64.3	1.56	0.028	0.646732	yes	UP	N	N	N	Y	Y	23.57	59.91
ENSRNOG00000003452.L01	302666	Asb11	ankyrin repeat and SOCS box-containing 11 [Source:RGD Symbol;Acc:1566298]	5	27.6	2.46	0.02835	0.650676	yes	UP	N	N	N	Y	Y	5.4	25.68
ENSRNOG00000027434	311617	Fitm2	fat storage-inducing transmembrane protein 2 [Source:RGD Symbol;Acc:1307696]	9.77	28.3	1.54	0.02885	0.658681	yes	UP	N	N	N	Y	Y	10.56	26.39
ENSRNOG00000000130.L01	313811	Dnajb5	DnaJ (Hsp40) homolog, subfamily B, member 5 [Source:RGD Symbol;Acc:1307453]	11.7	34.1	1.55	0.02915	0.661371	yes	UP	N	N	N	Y	Y	12.61	31.7
ENSRNOG00000009928.L01	29711	Bckdhb	branched chain keto acid dehydrogenase E1, beta polypeptide [Source:RGD Symbol;Acc:2197]	32.8	99.2	1.6	0.0292	0.661816	yes	UP	N	N	N	Y	Y	35.47	92.36
ENSRNOG00000016917.L01	25688	Clcn1	chloride channel, voltage-sensitive 1 [Source:RGD Symbol;Acc:2360]	10.9	36.3	1.74	0.0301	0.67631	yes	UP	N	N	N	Y	Y	11.74	33.77
ENSRNOG00000003973	304805	Cyb5r1	cytochrome b5 reductase 1 [Source:RGD Symbol;Acc:1306084]	29.6	84.1	1.51	0.03015	0.67631	yes	UP	N	N	N	Y	Y	31.96	78.28
ENSRNOG00000006110.L01	297748	Jph1	junctophilin 1 [Source:RGD Symbol;Acc:1308789]	7.46	22	1.56	0.0303	0.678278	yes	UP	N	N	N	Y	Y	8.06	20.48
ENSRNOG00000009063	290370	Dnajc15	DnaJ (Hsp40) homolog, subfamily C, member 15 [Source:RGD Symbol;Acc:1307154]	35.5	102	1.52	0.03035	0.6787	yes	UP	N	N	N	Y	Y	38.34	94.72
ENSRNOG00000015904.L01	171112	Wfdc1	WAP four-disulfide core domain 1 [Source:RGD Symbol;Acc:68938]	3.42	15.7	2.2	0.03055	0.681491	yes	UP	N	N	N	Y	Y	3.69	14.64
ENSRNOG00000019278.L01	308779	Fsd2	fibronectin type III and SPRY domain containing 2 [Source:RGD Symbol;Acc:1305167]	6.73	23.6	1.81	0.0306	0.681491	yes	UP	N	N	N	Y	Y	7.27	22
ENSRNOG00000017446	293652	Ndufs8	NADH dehydrogenase (ubiquinone) Fe-S protein 8 [Source:RGD Symbol;Acc:1309436]	95.9	270	1.49	0.03065	0.681908	yes	UP	N	N	N	Y	Y	103.7	250.98
ENSRNOG00000028238.L01	498066	Sh3bgr	SH3 domain binding glutamate-rich protein [Source:RGD Symbol;Acc:1563599]	88.7	390	2.14	0.03105	0.690102	yes	UP	N	N	N	Y	Y	95.78	363.17
ENSRNOG00000009741.L01	24307	Cyp4b1	cytochrome P450, family 4, subfamily b, polypeptide 1 [Source:RGD Symbol;Acc:2480]	10	36.9	1.88	0.03125	0.692428	yes	UP	N	N	N	Y	Y	10.85	34.36
ENSRNOG00000013766	170465	Acaa2	acetyl-CoA acyltransferase 2 [Source:RGD Symbol;Acc:620482]	64.4	208	1.69	0.03135	0.69253	yes	UP	N	N	N	Y	Y	69.61	193
ENSRNOG00000048430.L01	304551	Myo18b	myosin XVIIIb [Source:RGD Symbol;Acc:1594542]	6.44	19.5	1.6	0.03135	0.69253	yes	UP	N	N	N	Y	Y	6.96	18.15
ENSRNOG00000033162	113901	Chia	chitinase, acidic [Source:RGD Symbol;Acc:1303058]	1.18	13.1	3.47	0.0314	0.692932	yes	UP	N	N	N	Y	Y	1.27	12.17
ENSRNOG00000005698	25488	Ndufa5	NADH dehydrogenase (ubiquinone) 1 alpha subcomplex 5 [Source:RGD Symbol;Acc:3155]	228	656	1.53	0.03175	0.697827	yes	UP	N	N	N	Y	Y	245.97	610.42
ENSRNOG00000016684.L01	306811	Wnk2	WNK lysine deficient protein kinase 2 [Source:RGD Symbol;Acc:1307284]	8.99	26.2	1.54	0.03185	0.698305	yes	UP	N	N	N	Y	Y	9.72	24.39
ENSRNOG00000046171.L01	171078	Mlxipl	MLX interacting protein-like [Source:RGD Symbol;Acc:620400]	4.91	15.5	1.65	0.0319	0.698305	yes	UP	N	N	N	Y	Y	5.31	14.39
ENSRNOG00000009888	64372	Timm8b	translocase of inner mitochondrial membrane 8 homolog b (yeast) [Source:RGD Symbol;Acc:619840]	151	421	1.48	0.03205	0.700885	yes	UP	N	N	N	Y	Y	163.12	391.8
ENSRNOG00000036695	303746	Mrpl12	mitochondrial ribosomal protein L12 [Source:RGD Symbol;Acc:1588559]	60.3	169	1.48	0.0325	0.707175	yes	UP	N	N	N	Y	Y	65.22	156.63
ENSRNOG00000020812	690987	Gys1	glycogen synthase 1, muscle [Source:RGD Symbol;Acc:1589798]	23.5	67.6	1.52	0.03255	0.707556	yes	UP	N	N	N	Y	Y	25.44	62.92
ENSRNOG00000024905.L01	362712	Drc1	dynein regulatory complex subunit 1 [Source:RGD Symbol;Acc:1359318]	1.82	7.86	2.11	0.03265	0.708316	yes	UP	N	N	N	Y	Y	1.97	7.31
ENSRNOG00000005668.L01	296658	Ndufa8	NADH dehydrogenase (ubiquinone) 1 alpha subcomplex, 8 [Source:RGD Symbol;Acc:1306283]	102	290	1.5	0.03275	0.708747	yes	UP	N	N	N	Y	Y	110.66	269.26
ENSRNOG00000005615	25112	Gadd45a	growth arrest and DNA-damage-inducible, alpha [Source:RGD Symbol;Acc:2654]	20.4	57.4	1.49	0.03295	0.710578	yes	UP	N	N	N	Y	Y	22.09	53.35
ENSRNOG00000002459.L01	363790	Fbxo40	F-box protein 40 [Source:RGD Symbol;Acc:1309781]	7.8	22.6	1.54	0.0331	0.712774	yes	UP	N	N	N	Y	Y	8.42	21.07
ENSRNOG00000015347.L01	295323	Trim45	tripartite motif-containing 45 [Source:RGD Symbol;Acc:1309168]	8.17	27.8	1.77	0.03315	0.712774	yes	UP	N	N	N	Y	Y	8.83	25.87
ENSRNOG00000007668.L01	366949	Mafa	v-maf avian musculoaponeurotic fibrosarcoma oncogene A [Source:RGD Symbol;Acc:1562627]	4.17	13.1	1.66	0.03315	0.712774	yes	UP	N	N	N	Y	Y	4.51	12.21
ENSRNOG00000017248.L01	301518	Prkag3	protein kinase, AMP-activated, gamma 3 non-catalytic subunit [Source:RGD Symbol;Acc:1308698]	4.04	13	1.69	0.03335	0.714957	yes	UP	N	N	N	Y	Y	4.36	12.09
ENSRNOG00000021096.L01	308593	Tmem143	transmembrane protein 143 [Source:RGD Symbol;Acc:1305013]	7.02	21.7	1.63	0.03355	0.717127	yes	UP	N	N	N	Y	Y	7.59	20.16
ENSRNOG00000026616	362344	Ndufb2	NADH dehydrogenase (ubiquinone) 1 beta subcomplex, 2 [Source:RGD Symbol;Acc:1308130]	401	1250	1.64	0.03365	0.717856	yes	UP	N	N	N	Y	Y	433.57	1160.16
ENSRNOG00000009466	303373	Unc45b	unc-45 homolog B (C. elegans) [Source:RGD Symbol;Acc:1305666]	13.9	39.9	1.52	0.03385	0.720711	yes	UP	N	N	N	Y	Y	14.98	37.06
ENSRNOG00000011912.L01	306327	Tmem38a	transmembrane protein 38a [Source:RGD Symbol;Acc:1307901]	106	398	1.91	0.0339	0.72107	yes	UP	N	N	N	Y	Y	114.89	370.81
ENSRNOG00000038951	89786	Cox17	COX17 cytochrome c oxidase copper chaperone [Source:RGD Symbol;Acc:620548]	256	707	1.46	0.0343	0.725681	yes	UP	N	N	N	Y	Y	277.16	657.06
ENSRNOG00000005369.L01	50599	Kcnj3	potassium inwardly-rectifying channel, subfamily J, member 3 [Source:RGD Symbol;Acc:2958]	0.252	2.23	3.14	0.03435	0.725681	yes	UP	N	N	N	Y	Y	0.27	2.08
ENSRNOG00000010681.L01	54284	Pitx2	paired-like homeodomain 2 [Source:RGD Symbol;Acc:3331]	7.13	24.7	1.8	0.0346	0.727435	yes	UP	N	N	N	Y	Y	7.71	23.01
ENSRNOG00000032204	685596	Uqcrb	ubiquinol-cytochrome c reductase binding protein [Source:RGD Symbol;Acc:1311971]	42.5	133	1.65	0.0346	0.727435	yes	UP	N	N	N	Y	Y	45.92	124.11
ENSRNOG00000018736	100911615	Pnpla2	patatin-like phospholipase domain containing 2 [Source:RGD Symbol;Acc:1309044]	16.1	44.9	1.48	0.0349	0.73092	yes	UP	N	N	N	Y	Y	17.45	41.77
ENSRNOG00000036659.L01	498034	Fn3k	fructosamine 3 kinase [Source:RGD Symbol;Acc:1559983]	7.73	27.9	1.85	0.03515	0.733335	yes	UP	N	N	N	Y	Y	8.36	25.98
ENSRNOG00000028756	192255	Ubc	ubiquitin C [Source:RGD Symbol;Acc:621244]	29	82.9	1.51	0.0354	0.735031	yes	UP	N	N	N	Y	Y	31.36	77.09
ENSRNOG00000014568	681418	Ndufb10	NADH dehydrogenase (ubiquinone) 1 beta subcomplex, 10 [Source:RGD Symbol;Acc:1310782]	205	630	1.62	0.0354	0.735031	yes	UP	N	N	N	Y	Y	221.91	585.41
ENSRNOG00000001055.L01	304469	Rilpl1	Rab interacting lysosomal protein-like 1 [Source:RGD Symbol;Acc:1307973]	37.2	151	2.02	0.03565	0.738813	yes	UP	N	N	N	Y	Y	40.16	140.39
ENSRNOG00000020251.L01	308873	Art1	ADP-ribosyltransferase 1 [Source:RGD Symbol;Acc:1304591]	67.7	239	1.82	0.0358	0.740513	yes	UP	N	N	N	Y	Y	73.18	222.69
ENSRNOG00000023352.L01	499776	Fam78a	family with sequence similarity 78, member A [Source:RGD Symbol;Acc:1566351]	1.45	5.46	1.92	0.0358	0.740513	yes	UP	N	N	N	Y	Y	1.56	5.08
ENSRNOG00000007900	500065	Tspan33	tetraspanin 33 [Source:RGD Symbol;Acc:1560915]	0.47	4.11	3.13	0.03605	0.744976	yes	UP	N	N	N	Y	Y	0.51	3.82
ENSRNOG00000012512.L01	246172	Nexn	nexilin (F actin binding protein) [Source:RGD Symbol;Acc:708354]	29	86.4	1.57	0.03675	0.752936	yes	UP	N	N	N	Y	Y	31.33	80.33
ENSRNOG00000011949.L01	294964	Ndufb5	NADH dehydrogenase (ubiquinone) 1 beta subcomplex, 5 [Source:RGD Symbol;Acc:1305909]	89.7	254	1.5	0.03685	0.752936	yes	UP	N	N	N	Y	Y	96.85	236.78
ENSRNOG00000025781.L01	309433	Sec31b	SEC31 homolog B (S. cerevisiae) [Source:RGD Symbol;Acc:1598329]	3.52	11.5	1.71	0.03685	0.752936	yes	UP	N	N	N	Y	Y	3.8	10.69
ENSRNOG00000013320.L01	500441	RGD1561916	similar to testes development-related NYD-SP22 isoform 1 [Source:RGD Symbol;Acc:1561916]	2.04	9.85	2.27	0.0369	0.753251	yes	UP	N	N	N	Y	Y	2.21	9.17
ENSRNOG00000024508.L01	690326	LOC690326	hypothetical protein LOC690326 [Source:RGD Symbol;Acc:1597362]	0	0.809	inf	0.0374	0.762029	yes	UP	N	N	N	Y	Y	0	0.75
ENSRNOG00000011659.L01	365298	Alpk3	alpha-kinase 3 [Source:RGD Symbol;Acc:1309860]	14.9	48.6	1.7	0.03765	0.765691	yes	UP	N	N	N	Y	Y	16.14	45.2
ENSRNOG00000018775.L01	100363310	Cystm1	cysteine-rich transmembrane module containing 1 [Source:RGD Symbol;Acc:2323233]	51.5	148	1.52	0.03785	0.767608	yes	UP	N	N	N	Y	Y	55.65	137.3
ENSRNOG00000046763.L01	684425	Adssl1	adenylosuccinate synthase like 1 [Source:RGD Symbol;Acc:1590342]	109	407	1.89	0.0379	0.767907	yes	UP	N	N	N	Y	Y	118.31	378.29
ENSRNOG00000001182.L01	64539	Ndufv3	NADH dehydrogenase (ubiquinone) flavoprotein 3 [Source:RGD Symbol;Acc:621020]	33	121	1.87	0.03795	0.768205	yes	UP	N	N	N	Y	Y	35.62	112.16
ENSRNOG00000016151.L01	316330	Ankrd23	ankyrin repeat domain 23 [Source:RGD Symbol;Acc:1310398]	58.9	194	1.72	0.0381	0.769811	yes	UP	N	N	N	Y	Y	63.7	180.38
ENSRNOG00000007765.L01	295691	Frzb	frizzled-related protein [Source:RGD Symbol;Acc:1311315]	9.3	25.3	1.45	0.0386	0.776313	yes	UP	N	N	N	Y	Y	10.05	23.57
ENSRNOG00000046076	688308	Tspan10	tetraspanin 10 [Source:RGD Symbol;Acc:1590062]	0	0.6	inf	0.03895	0.778321	yes	UP	N	N	N	Y	Y	0	0.56
ENSRNOG00000008569	315167	Ndufa6	NADH dehydrogenase (ubiquinone) 1 alpha subcomplex, 6 (B14) [Source:RGD Symbol;Acc:1309818]	204	537	1.4	0.039	0.778606	yes	UP	N	N	N	Y	Y	220.06	499.5
ENSRNOG00000046547.L01	690139	Rbm24	RNA binding motif protein 24 [Source:RGD Symbol;Acc:1584029]	16.7	43.9	1.39	0.0392	0.779028	yes	UP	N	N	N	Y	Y	18.09	40.96
ENSRNOG00000036585.L01	365476	Cfap43	cilia and flagella associated protein 43 [Source:RGD Symbol;Acc:1560545]	2.5	9.62	1.95	0.0397	0.785496	yes	UP	N	N	N	Y	Y	2.7	8.96
ENSRNOG00000007031.L01	155812	Trim9	tripartite motif-containing 9 [Source:RGD Symbol;Acc:621540]	0.359	2.89	3.01	0.0399	0.78577	yes	UP	N	N	N	Y	Y	0.39	2.69
ENSRNOG00000011438.L01	100912884	Sftpa1	surfactant protein A1 [Source:RGD Symbol;Acc:3665]	1.55	7.54	2.29	0.03995	0.786044	yes	UP	N	N	N	Y	Y	1.67	7.02
ENSRNOG00000000610.L01	294362	Cisd1	CDGSH iron sulfur domain 1 [Source:RGD Symbol;Acc:1309529]	92.8	272	1.55	0.04	0.786318	yes	UP	N	N	N	Y	Y	100.35	253.25
ENSRNOG00000015011.L01	309415	Fam189a2	family with sequence similarity 189, member A2 [Source:RGD Symbol;Acc:1307524]	10.4	30.9	1.57	0.04025	0.790519	yes	UP	N	N	N	Y	Y	11.26	28.71
ENSRNOG00000017637.L01	114508	Fbp2	fructose-1,6-bisphosphatase 2 [Source:RGD Symbol;Acc:620930]	10.7	34.8	1.7	0.0403	0.790707	yes	UP	N	N	N	Y	Y	11.53	32.35
ENSRNOG00000013676.L01	29337	Plcg2	phospholipase C, gamma 2 [Source:RGD Symbol;Acc:3348]	3.3	9.44	1.52	0.0404	0.790707	yes	UP	N	N	N	Y	Y	3.57	8.78
ENSRNOG00000017226	25139	Slc2a4	solute carrier family 2 (facilitated glucose transporter), member 4 [Source:RGD Symbol;Acc:2711]	47.6	145	1.6	0.04045	0.790707	yes	UP	N	N	N	Y	Y	51.47	134.57
ENSRNOG00000010798.L01	364403	Blk	BLK proto-oncogene, Src family tyrosine kinase [Source:RGD Symbol;Acc:1308859]	0.335	2.8	3.07	0.04045	0.790707	yes	UP	N	N	N	Y	Y	0.36	2.61
ENSRNOG00000019823	100910944	LOC100910944	reactive oxygen species modulator 1-like [Source:RGD Symbol;Acc:6496011]	112	294	1.39	0.04055	0.790707	yes	UP	N	N	N	Y	Y	121.57	273.69
ENSRNOG00000002873.L01	287346	Fam183b	family with sequence similarity 183, member B [Source:RGD Symbol;Acc:1561932]	3.95	27.6	2.8	0.04065	0.79124	yes	UP	N	N	N	Y	Y	4.27	25.69
ENSRNOG00000038074	498555	LOC498555	similar to 60S acidic ribosomal protein P2 [Source:RGD Symbol;Acc:1590791]	107	286	1.42	0.04065	0.79124	yes	UP	N	N	N	Y	Y	115.75	265.68
ENSRNOG00000018044.L01	114209	Phyh	phytanoyl-CoA 2-hydroxylase [Source:RGD Symbol;Acc:620317]	129	425	1.72	0.04075	0.791771	yes	UP	N	N	N	Y	Y	139.5	395.43
ENSRNOG00000001425.L01	114203	Sh2b2	SH2B adaptor protein 2 [Source:RGD Symbol;Acc:69284]	1.48	7.07	2.25	0.0409	0.792474	yes	UP	N	N	N	Y	Y	1.61	6.58
ENSRNOG00000001873.L01	25041	P2rx6	purinergic receptor P2X, ligand-gated ion channel, 6 [Source:RGD Symbol;Acc:3243]	5.91	19.3	1.71	0.04095	0.792474	yes	UP	N	N	N	Y	Y	6.39	17.94
ENSRNOG00000004197.L01	503446	Asb12	ankyrin repeat and SOCS box-containing 12 [Source:RGD Symbol;Acc:1561142]	9.82	32.7	1.74	0.041	0.792474	yes	UP	N	N	N	Y	Y	10.61	30.45
ENSRNOG00000004322.L01	84357	Sh3kbp1	SH3-domain kinase binding protein 1 [Source:RGD Symbol;Acc:620904]	13.8	40.4	1.56	0.04105	0.792474	yes	UP	N	N	N	Y	Y	14.86	37.68
ENSRNOG00000012478.L01	25546	Shox2	short stature homeobox 2 [Source:RGD Symbol;Acc:3674]	6.45	18.6	1.53	0.0411	0.792474	yes	UP	N	N	N	Y	Y	6.97	17.32
ENSRNOG00000046918	363474	Apoo	apolipoprotein O [Source:RGD Symbol;Acc:1565289]	17.6	49.4	1.49	0.0411	0.792474	yes	UP	N	N	N	Y	Y	19.01	45.99
ENSRNOG00000042903	688386	Cox7a2	cytochrome c oxidase subunit VIIa polypeptide 2 [Source:RGD Symbol;Acc:68365]	341	963	1.5	0.0413	0.793959	yes	UP	N	N	N	Y	Y	368.47	895.97
ENSRNOG00000008027.L01	313225	Murc	muscle-related coiled-coil protein [Source:RGD Symbol;Acc:1310395]	14.6	38.6	1.4	0.0414	0.794479	yes	UP	N	N	N	Y	Y	15.75	35.92
ENSRNOG00000024885.L01	499972	Asb10	ankyrin repeat and SOCS box-containing 10 [Source:RGD Symbol;Acc:1562922]	5.28	19.6	1.89	0.04165	0.79787	yes	UP	N	N	N	Y	Y	5.71	18.22
ENSRNOG00000001959.L01	24575	Mx1	myxovirus (influenza virus) resistance 1 [Source:RGD Symbol;Acc:3127]	6.14	17.4	1.5	0.04235	0.808436	yes	UP	N	N	N	Y	Y	6.63	16.17
ENSRNOG00000000165.L01	24638	Pfkfb1	6-phosphofructo-2-kinase/fructose-2,6-biphosphatase 1 [Source:RGD Symbol;Acc:3307]	7.41	28.5	1.94	0.04265	0.810147	yes	UP	N	N	N	Y	Y	8	26.52
ENSRNOG00000028856.L01	680549	Pknox2	PBX/knotted 1 homeobox 2 [Source:RGD Symbol;Acc:1590611]	3.24	9.77	1.59	0.0427	0.810147	yes	UP	N	N	N	Y	Y	3.49	9.09
ENSRNOG00000016952.L01	690848	LOC686442	similar to ubiquinol-cytochrome c reductase subunit [Source:RGD Symbol;Acc:1597642]	319	1010	1.65	0.0427	0.810147	yes	UP	N	N	N	Y	Y	345.46	935.46
ENSRNOG00000001036.L01	288478	Rsph10b	radial spoke head 10 homolog B (Chlamydomonas) [Source:RGD Symbol;Acc:1311893]	1.83	7.05	1.94	0.043	0.813712	yes	UP	N	N	N	Y	Y	1.98	6.56
ENSRNOG00000008329	299310	Ndufb11	NADH dehydrogenase (ubiquinone) 1 beta subcomplex, 11 [Source:RGD Symbol;Acc:1563698]	166	497	1.58	0.04315	0.813961	yes	UP	N	N	N	Y	Y	179.62	462.6
ENSRNOG00000025110.L01	293449	Vwa3a	von Willebrand factor A domain containing 3A [Source:RGD Symbol;Acc:1311670]	2.39	8.1	1.76	0.0432	0.813961	yes	UP	N	N	N	Y	Y	2.59	7.54
ENSRNOG00000032443.L01	500267	Lmod3	leiomodin 3 (fetal) [Source:RGD Symbol;Acc:1564924]	32.4	88.9	1.46	0.04335	0.816082	yes	UP	N	N	N	Y	Y	34.97	82.71
ENSRNOG00000022099	365377	Trim72	tripartite motif-containing 72 [Source:RGD Symbol;Acc:1562778]	37	104	1.49	0.0437	0.820543	yes	UP	N	N	N	Y	Y	39.97	96.63
ENSRNOG00000001827.L02	100910195	Masp1	mannan-binding lectin serine peptidase 1 [Source:RGD Symbol;Acc:620213]	19.3	57.4	1.57	0.04385	0.820991	yes	UP	N	N	N	Y	Y	20.84	53.42
ENSRNOG00000029333.L01	298381	Echdc2	enoyl CoA hydratase domain containing 2 [Source:RGD Symbol;Acc:1308525]	8.52	25.2	1.56	0.0439	0.820991	yes	UP	N	N	N	Y	Y	9.21	23.43
ENSRNOG00000021101.L01	29744	Sema6c	sema domain, transmembrane domain (TM), and cytoplasmic domain, (semaphorin) 6C [Source:RGD Symbol;Acc:3659]	8.68	25	1.53	0.04405	0.822153	yes	UP	N	N	N	Y	Y	9.39	23.27
ENSRNOG00000029726	24423	Gstm1	glutathione S-transferase mu 1 [Source:RGD Symbol;Acc:2755]	21.6	58	1.42	0.0443	0.824699	yes	UP	N	N	N	Y	Y	23.34	53.95
ENSRNOG00000007967	298596	Sdhb	succinate dehydrogenase complex, subunit B, iron sulfur (Ip) [Source:RGD Symbol;Acc:1308598]	201	625	1.63	0.04475	0.829973	yes	UP	N	N	N	Y	Y	217.54	580.89
ENSRNOG00000048915	684352	Twf2	twinfilin actin-binding protein 2 [Source:RGD Symbol;Acc:1591460]	32.7	86.1	1.4	0.04475	0.829973	yes	UP	N	N	N	Y	Y	35.4	80.06
ENSRNOG00000039649	100359918	Lnp1	leukemia NUP98 fusion partner 1 [Source:RGD Symbol;Acc:2323126]	0	0.592	inf	0.0448	0.829973	yes	UP	N	N	N	Y	Y	0	0.55
ENSRNOG00000015972.L01	308637	Ano5	anoctamin 5 [Source:RGD Symbol;Acc:1564265]	3.72	10	1.43	0.04485	0.829973	yes	UP	N	N	N	Y	Y	4.02	9.35
ENSRNOG00000019557.L01	316614	Asb18	ankyrin repeat and SOCS box-containing 18 [Source:RGD Symbol;Acc:1310850]	2.93	11.4	1.96	0.04485	0.829973	yes	UP	N	N	N	Y	Y	3.17	10.62
ENSRNOG00000005798	29161	Cav3	caveolin 3 [Source:RGD Symbol;Acc:2281]	24.6	65.3	1.41	0.0451	0.833183	yes	UP	N	N	N	Y	Y	26.53	60.78
ENSRNOG00000012658.L01	114108	Pdlim3	PDZ and LIM domain 3 [Source:RGD Symbol;Acc:620427]	88.8	284	1.68	0.04525	0.835246	yes	UP	N	N	N	Y	Y	95.93	264.37
ENSRNOG00000012932.L01	499980	Ccdc146	coiled-coil domain containing 146 [Source:RGD Symbol;Acc:1559535]	1.31	5.62	2.1	0.0454	0.837305	yes	UP	N	N	N	Y	Y	1.41	5.22
ENSRNOG00000028945	501129	Tmem182	transmembrane protein 182 [Source:RGD Symbol;Acc:1563696]	21.9	56.2	1.36	0.04545	0.837518	yes	UP	N	N	N	Y	Y	23.64	52.35
ENSRNOG00000002860	360867	Ccdc181	coiled-coil domain containing 181 [Source:RGD Symbol;Acc:1309708]	17.3	45.8	1.4	0.0455	0.837731	yes	UP	N	N	N	Y	Y	18.69	42.55
ENSRNOG00000042503	81728	Ndufv2	NADH dehydrogenase (ubiquinone) flavoprotein 2 [Source:RGD Symbol;Acc:621733]	201	635	1.66	0.04555	0.837943	yes	UP	N	N	N	Y	Y	217.33	590.7
ENSRNOG00000013605.L01	691161	Sh2d6	SH2 domain containing 6 [Source:RGD Symbol;Acc:1587427]	17.1	48.7	1.5	0.04565	0.839074	yes	UP	N	N	N	Y	Y	18.54	45.28
ENSRNOG00000002976.L01	303920	Maats1	MYCBP-associated, testis expressed 1 [Source:RGD Symbol;Acc:1305539]	0.662	3.12	2.24	0.04575	0.839495	yes	UP	N	N	N	Y	Y	0.71	2.91
ENSRNOG00000020464	299628	Mrpl54	mitochondrial ribosomal protein L54 [Source:RGD Symbol;Acc:1305694]	84.7	223	1.4	0.04615	0.8447	yes	UP	N	N	N	Y	Y	91.56	207.25
ENSRNOG00000008243.L01	311168	Slc43a1	solute carrier family 43 (amino acid system L transporter), member 1 [Source:RGD Symbol;Acc:1308229]	2.19	8.26	1.91	0.04645	0.848255	yes	UP	N	N	N	Y	Y	2.37	7.68
ENSRNOG00000007784	288785	Bloc1s1	biogenesis of lysosomal organelles complex-1, subunit 1 [Source:RGD Symbol;Acc:1307564]	69.9	182	1.38	0.0465	0.848255	yes	UP	N	N	N	Y	Y	75.62	169.24
ENSRNOG00000005269.L01	302948	Srl	sarcalumenin [Source:RGD Symbol;Acc:1306564]	39.5	130	1.72	0.04675	0.848646	yes	UP	N	N	N	Y	Y	42.64	120.99
ENSRNOG00000020029.L01	685545	Fam195a	family with sequence similarity 195, member A [Source:RGD Symbol;Acc:1592603]	12	43.2	1.85	0.04695	0.848646	yes	UP	N	N	N	Y	Y	12.98	40.16
ENSRNOG00000020495.L01	292762	Eif3k	eukaryotic translation initiation factor 3, subunit K [Source:RGD Symbol;Acc:1309221]	68.1	264	1.96	0.047	0.848845	yes	UP	N	N	N	Y	Y	73.55	245.93
ENSRNOG00000019303.L01	293854	Srpk3	SRSF protein kinase 3 [Source:RGD Symbol;Acc:727856]	15.5	41.2	1.41	0.04715	0.849194	yes	UP	N	N	N	Y	Y	16.8	38.34
ENSRNOG00000022419.L01	305448	Dok7	docking protein 7 [Source:RGD Symbol;Acc:1566416]	3.98	12	1.59	0.04725	0.849194	yes	UP	N	N	N	Y	Y	4.31	11.15
ENSRNOG00000010451	246234	Slc34a3	solute carrier family 34 (type II sodium/phosphate contransporter), member 3 [Source:RGD Symbol;Acc:708551]	0.418	3.12	2.9	0.04745	0.849194	yes	UP	N	N	N	Y	Y	0.45	2.91
ENSRNOG00000007040	54311	Timm17a	translocase of inner mitochondrial membrane 17 homolog A (yeast) [Source:RGD Symbol;Acc:3862]	69.8	179	1.36	0.0475	0.849194	yes	UP	N	N	N	Y	Y	75.36	166.22
ENSRNOG00000042320	363985	Slc41a1	solute carrier family 41 (magnesium transporter), member 1 [Source:RGD Symbol;Acc:1311397]	13.1	33.2	1.34	0.04785	0.849194	yes	UP	N	N	N	Y	Y	14.17	30.91
ENSRNOG00000020345.L01	689414	Slc25a42	solute carrier family 25, member 42 [Source:RGD Symbol;Acc:1592346]	13.8	34.5	1.33	0.048	0.849194	yes	UP	N	N	N	Y	Y	14.88	32.11
ENSRNOG00000023465.L01	500300	LOC500300	similar to hypothetical protein MGC6835 [Source:RGD Symbol;Acc:1565700]	9.88	33.3	1.75	0.0481	0.849194	yes	UP	N	N	N	Y	Y	10.67	30.99
ENSRNOG00000012827.L01	310483	Mlf1	myeloid leukemia factor 1 [Source:RGD Symbol;Acc:1306854]	66.1	180	1.44	0.04835	0.850366	yes	UP	N	N	N	Y	Y	71.37	167.49
ENSRNOG00000048769.L01	685440	Nek5	NIMA-related kinase 5 [Source:RGD Symbol;Acc:1593817]	1.75	6.36	1.86	0.04835	0.850366	yes	UP	N	N	N	Y	Y	1.89	5.92
ENSRNOG00000006939	299643	Ndufa7	NADH dehydrogenase (ubiquinone) 1 alpha subcomplex, 7 [Source:RGD Symbol;Acc:1304597]	134	348	1.38	0.0484	0.850366	yes	UP	N	N	N	Y	Y	144.48	323.16
ENSRNOG00000000804	294230	Mrps18b	mitochondrial ribosomal protein S18B [Source:RGD Symbol;Acc:1302998]	35.7	94.5	1.4	0.0485	0.850366	yes	UP	N	N	N	Y	Y	38.57	87.89
ENSRNOG00000032487.L01	24800	Sts	steroid sulfatase (microsomal), isozyme S [Source:RGD Symbol;Acc:3783]	2.49	8.91	1.84	0.04865	0.850366	yes	UP	N	N	N	Y	Y	2.7	8.28
ENSRNOG00000018114.L01	25363	Acadvl	acyl-CoA dehydrogenase, very long chain [Source:RGD Symbol;Acc:2014]	78.3	239	1.61	0.0487	0.850366	yes	UP	N	N	N	Y	Y	84.59	222.04
ENSRNOG00000016618.L01	100362283	Tmem52	transmembrane protein 52 [Source:RGD Symbol;Acc:2318502]	25.3	104	2.03	0.0487	0.850366	yes	UP	N	N	N	Y	Y	27.35	96.31
ENSRNOG00000007475.L01	300027	Gpihbp1	glycosylphosphatidylinositol anchored high density lipoprotein binding protein 1 [Source:RGD Symbol;Acc:1564237]	2.52	14.1	2.48	0.0489	0.850366	yes	UP	N	N	N	Y	Y	2.72	13.1
ENSRNOG00000040122	498440	Myoz1	myozenin 1 [Source:RGD Symbol;Acc:1561064]	201	833	2.05	0.04895	0.850366	yes	UP	N	N	N	Y	Y	217.44	774.58
ENSRNOG00000029465.L01	366909	Slc26a10	solute carrier family 26, member 10 [Source:RGD Symbol;Acc:1564851]	10.7	28.7	1.43	0.0491	0.850366	yes	UP	N	N	N	Y	Y	11.52	26.69
ENSRNOG00000010646.L01	503035	Tmem229b	transmembrane protein 229B [Source:RGD Symbol;Acc:1562622]	8.85	23	1.38	0.0492	0.850366	yes	UP	N	N	N	Y	Y	9.57	21.4
ENSRNOG00000011684	361215	Auh	AU RNA binding protein/enoyl-CoA hydratase [Source:RGD Symbol;Acc:1306087]	27.3	70.1	1.36	0.0496	0.850366	yes	UP	N	N	N	Y	Y	29.51	65.18
ENSRNOG00000010092.L01	317379	Magix	MAGI family member, X-linked [Source:RGD Symbol;Acc:1549729]	2.99	9.36	1.65	0.04965	0.850366	yes	UP	N	N	N	Y	Y	3.23	8.7
ENSRNOG00000017983.L01	362087	Ubac1	UBA domain containing 1 [Source:RGD Symbol;Acc:1359542]	28.8	72.8	1.34	0.04965	0.850366	yes	UP	N	N	N	Y	Y	31.12	67.67
ENSRNOG00000036825	29229	Spt1	salivary protein 1 [Source:RGD Symbol;Acc:3754]	0	1.89	inf	0.0497	0.850366	yes	UP	N	N	N	Y	Y	0	1.76
ENSRNOG00000012428.L01	54267	Maf	v-maf avian musculoaponeurotic fibrosarcoma oncogene homolog [Source:RGD Symbol;Acc:3034]	5	13.7	1.46	0.0497	0.850366	yes	UP	N	N	N	Y	Y	5.41	12.77
ENSRNOG00000043358	685699	LOC685699	hypothetical protein LOC685699 [Source:RGD Symbol;Acc:1591314]	0	1.02	inf	0.0497	0.850366	yes	UP	N	N	N	Y	Y	0	0.95

## Sheet: DEG2 Y1-4 vs O5-8
GeneAcc	EntrezGeneID	GeneName	Desc	Value_1	Value_2	log2fc	p-value	q-value	DEG:PV=0.05:SELECT	DEG:UP_DOWN	DEG:QV<=0.05	DEG:QV<=0.10	DEG:PV<=0.01	DEG:PV<=0.05	DEG:FC2>=0	EXP:Y1-4:FPKM	EXP:O5-8:FPKM
ENSRNOG00000004575.L01	24493	Il1a	interleukin 1 alpha [Source:RGD Symbol;Acc:2890]	1.86	0	#NAME?	5e-05	0.0277683	yes	DOWN	Y	Y	Y	Y	Y	1.86	0
ENSRNOG00000003745.L01	25389	Atf3	activating transcription factor 3 [Source:RGD Symbol;Acc:2165]	47.6	10.1	-2.24	5e-05	0.0277683	yes	DOWN	Y	Y	Y	Y	Y	47.84	10.07
ENSRNOG00000028992.L01	58968	Acan	aggrecan [Source:RGD Symbol;Acc:68358]	11.1	0.649	-4.1	5e-05	0.0277683	yes	DOWN	Y	Y	Y	Y	Y	11.2	0.65
ENSRNOG00000002460.L01	60325	Serpinb2	serpin peptidase inhibitor, clade B (ovalbumin), member 2 [Source:RGD Symbol;Acc:621823]	73.8	10.9	-2.76	5e-05	0.0277683	yes	DOWN	Y	Y	Y	Y	Y	74.13	10.86
ENSRNOG00000002006	64565	Tmprss11d	transmembrane protease, serine 11d [Source:RGD Symbol;Acc:620654]	3.11	0	#NAME?	5e-05	0.0277683	yes	DOWN	Y	Y	Y	Y	Y	3.13	0
ENSRNOG00000004476.L01	114557	Wif1	Wnt inhibitory factor 1 [Source:RGD Symbol;Acc:619774]	129	6.42	-4.33	5e-05	0.0277683	yes	DOWN	Y	Y	Y	Y	Y	129.81	6.39
ENSRNOG00000002640.L01	116589	Serpinb5	serpin peptidase inhibitor, clade B (ovalbumin), member 5 [Source:RGD Symbol;Acc:69342]	72.5	17.1	-2.08	5e-05	0.0277683	yes	DOWN	Y	Y	Y	Y	Y	72.83	17.02
ENSRNOG00000002417.L01	266775	Serpinb10	serpin peptidase inhibitor, clade B (ovalbumin), member 10 [Source:RGD Symbol;Acc:628853]	95.6	18.8	-2.35	5e-05	0.0277683	yes	DOWN	Y	Y	Y	Y	Y	96.08	18.67
ENSRNOG00000026371	287702	Krt17	keratin 17 [Source:RGD Symbol;Acc:1303181]	256	36.4	-2.81	5e-05	0.0277683	yes	DOWN	Y	Y	Y	Y	Y	257.21	36.24
ENSRNOG00000043342	290595	LOC290595	hypothetical gene supported by AF152002 [Source:RGD Symbol;Acc:1566160]	181	25.7	-2.82	5e-05	0.0277683	yes	DOWN	Y	Y	Y	Y	Y	182.1	25.6
ENSRNOG00000016632.L01	291752	Dsg3	desmoglein 3 [Source:RGD Symbol;Acc:1592103]	67.4	13.7	-2.29	5e-05	0.0277683	yes	DOWN	Y	Y	Y	Y	Y	67.7	13.69
ENSRNOG00000016853.L01	291755	Dsg1	desmoglein 1 [Source:RGD Symbol;Acc:1309925]	26.9	0.887	-4.92	5e-05	0.0277683	yes	DOWN	Y	Y	Y	Y	Y	27.08	0.88
ENSRNOG00000026244.L01	292755	Nccrp1	non-specific cytotoxic cell receptor protein 1 homolog (zebrafish) [Source:RGD Symbol;Acc:1305932]	65.1	4.76	-3.77	5e-05	0.0277683	yes	DOWN	Y	Y	Y	Y	Y	65.43	4.74
ENSRNOG00000029427.L01	298555	Grhl3	grainyhead-like 3 (Drosophila) [Source:RGD Symbol;Acc:1308320]	27.3	4.51	-2.6	5e-05	0.0277683	yes	DOWN	Y	Y	Y	Y	Y	27.42	4.49
ENSRNOG00000039668.L01	304021	Col8a1	collagen, type VIII, alpha 1 [Source:RGD Symbol;Acc:1309361]	35.8	4.83	-2.89	5e-05	0.0277683	yes	DOWN	Y	Y	Y	Y	Y	36.02	4.81
ENSRNOG00000017159.L01	307563	Dsc3	desmocollin 3 [Source:RGD Symbol;Acc:1311782]	28.1	4.81	-2.55	5e-05	0.0277683	yes	DOWN	Y	Y	Y	Y	Y	28.21	4.79
ENSRNOG00000032404.L01	360243	Top2a	topoisomerase (DNA) II alpha [Source:RGD Symbol;Acc:62048]	13.6	2.21	-2.62	5e-05	0.0277683	yes	DOWN	Y	Y	Y	Y	Y	13.69	2.2
ENSRNOG00000007183	100911252	LOC100360977	TRIMCyp-like [Source:RGD Symbol;Acc:2321083]	158	21	-2.91	5e-05	0.0277683	yes	DOWN	Y	Y	Y	Y	Y	159.13	20.93
ENSRNOG00000020380.L01	29518	Lgals7	lectin, galactoside-binding, soluble, 7 [Source:RGD Symbol;Acc:61951]	633	117	-2.44	0.0001	0.0495	yes	DOWN	Y	Y	Y	Y	Y	635.49	115.93
ENSRNOG00000019999.L01	60378	Lypd3	Ly6/Plaur domain containing 3 [Source:RGD Symbol;Acc:69053]	150	37	-2.02	0.0001	0.0495	yes	DOWN	Y	Y	Y	Y	Y	150.38	36.81
ENSRNOG00000029964.L01	289546	Tmprss11g	transmembrane protease, serine 11G [Source:RGD Symbol;Acc:1306446]	67.8	17.4	-1.97	0.0001	0.0495	yes	DOWN	Y	Y	Y	Y	Y	68.17	17.28
ENSRNOG00000009531.L01	362285	Col9a3	collagen, type IX, alpha 3 [Source:RGD Symbol;Acc:1310255]	26.1	3.71	-2.82	0.0001	0.0495	yes	DOWN	Y	Y	Y	Y	Y	26.26	3.69
ENSRNOG00000036877.L01	499721	Clca4l	chloride channel calcium activated 4-like [Source:RGD Symbol;Acc:1591945]	30.8	1.78	-4.11	0.0001	0.0495	yes	DOWN	Y	Y	Y	Y	Y	30.98	1.77
ENSRNOG00000004795.L01	302328	Pof1b	premature ovarian failure 1B [Source:RGD Symbol;Acc:1560798]	51.7	13.6	-1.93	0.00015	0.0644434	yes	DOWN	N	Y	Y	Y	Y	51.94	13.53
ENSRNOG00000028576.L01	364774	Calml5	calmodulin-like 5 [Source:RGD Symbol;Acc:1310047]	313	46.3	-2.76	0.00015	0.0644434	yes	DOWN	N	Y	Y	Y	Y	314.38	46.05
ENSRNOG00000030676.L01	502412	RGD1562885	similar to RIKEN cDNA 2300002M23 [Source:RGD Symbol;Acc:1562885]	57.5	8.42	-2.77	0.00015	0.0644434	yes	DOWN	N	Y	Y	Y	Y	57.81	8.38
ENSRNOG00000022282	25412	Col2a1	collagen, type II, alpha 1 [Source:RGD Symbol;Acc:2375]	11.9	0.425	-4.81	0.0002	0.0759	yes	DOWN	N	Y	Y	Y	Y	11.95	0.42
ENSRNOG00000001162	116592	Tff2	trefoil factor 2 [Source:RGD Symbol;Acc:620709]	193	37.3	-2.37	0.0002	0.0759	yes	DOWN	N	Y	Y	Y	Y	193.65	37.12
ENSRNOG00000025994.L01	315318	Krt80	keratin 80 [Source:RGD Symbol;Acc:1359177]	113	25.6	-2.14	0.0002	0.0759	yes	DOWN	N	Y	Y	Y	Y	113.47	25.44
ENSRNOG00000043445.L01	361993	Them5	thioesterase superfamily member 5 [Source:RGD Symbol;Acc:1562059]	108	13.5	-3	0.0002	0.0759	yes	DOWN	N	Y	Y	Y	Y	108.22	13.39
ENSRNOG00000012238.L01	365009	Clec3a	C-type lectin domain family 3, member A [Source:RGD Symbol;Acc:1306295]	36.2	2.31	-3.97	0.0002	0.0759	yes	DOWN	N	Y	Y	Y	Y	36.39	2.3
ENSRNOG00000012535	501106	Gpr115	G protein-coupled receptor 115 [Source:RGD Symbol;Acc:1565216]	15.6	1.26	-3.63	0.0002	0.0759	yes	DOWN	N	Y	Y	Y	Y	15.73	1.26
ENSRNOG00000007657.L01	298101	Col27a1	collagen, type XXVII, alpha 1 [Source:RGD Symbol;Acc:735115]	20.3	4.66	-2.12	0.00025	0.0837132	yes	DOWN	N	Y	Y	Y	Y	20.44	4.64
ENSRNOG00000024689.L01	171160	Hopx	HOP homeobox [Source:RGD Symbol;Acc:621841]	396	101	-1.98	0.00035	0.102173	yes	DOWN	N	N	Y	Y	Y	397.75	100.17
ENSRNOG00000009399.L01	295714	RGD1311224	similar to fatty acid desaturase 2; linoleoyl-CoA desaturase (delta-6-desaturase)-like 2; delta-6 fatty acid desaturase [Source:RGD Symbol;Acc:1311224]	36.2	5.84	-2.63	0.00035	0.102173	yes	DOWN	N	N	Y	Y	Y	36.4	5.82
ENSRNOG00000023148.L01	25654	Col11a1	collagen, type XI, alpha 1 [Source:RGD Symbol;Acc:2372]	3.65	0.207	-4.14	0.0004	0.10445	yes	DOWN	N	N	Y	Y	Y	3.67	0.21
ENSRNOG00000012067	499322	Fam111a	family with sequence similarity 111, member A [Source:RGD Symbol;Acc:1560913]	43.3	10.3	-2.07	0.0004	0.10445	yes	DOWN	N	N	Y	Y	Y	43.51	10.25
ENSRNOG00000049075	140868	Fabp5	fatty acid binding protein 5, epidermal [Source:RGD Symbol;Acc:70997]	287	72.8	-1.98	0.00045	0.10445	yes	DOWN	N	N	Y	Y	Y	288.05	72.44
ENSRNOG00000021771.L01	300656	Trim29	tripartite motif-containing 29 [Source:RGD Symbol;Acc:1307858]	97.9	26.5	-1.89	0.00045	0.10445	yes	DOWN	N	N	Y	Y	Y	98.34	26.37
ENSRNOG00000024909	315324	Krt78	keratin 78 [Source:RGD Symbol;Acc:1591341]	24.2	5.46	-2.15	0.00045	0.10445	yes	DOWN	N	N	Y	Y	Y	24.33	5.43
ENSRNOG00000003183	64507	Fmod	fibromodulin [Source:RGD Symbol;Acc:619769]	25.6	3.53	-2.86	0.0005	0.10445	yes	DOWN	N	N	Y	Y	Y	25.71	3.51
ENSRNOG00000014070.L01	287699	Krt13	keratin 13 [Source:RGD Symbol;Acc:1302937]	962	154	-2.64	0.00055	0.109296	yes	DOWN	N	N	Y	Y	Y	965.93	153.1
ENSRNOG00000039969.L01	291760	Dsc2	desmocollin 2 [Source:RGD Symbol;Acc:1309426]	87.6	26.4	-1.73	0.00055	0.109296	yes	DOWN	N	N	Y	Y	Y	88.04	26.24
ENSRNOG00000004275.L01	317470	Egfl6	EGF-like-domain, multiple 6 [Source:RGD Symbol;Acc:1563321]	42.9	12.1	-1.82	0.00065	0.114733	yes	DOWN	N	N	Y	Y	Y	43.09	12.08
ENSRNOG00000032002.L01	29331	Hapln1	hyaluronan and proteoglycan link protein 1 [Source:RGD Symbol;Acc:2412]	9.37	1.29	-2.86	0.0007	0.12144	yes	DOWN	N	N	Y	Y	Y	9.42	1.28
ENSRNOG00000026951.L01	301039	Susd5	sushi domain containing 5 [Source:RGD Symbol;Acc:1561132]	11	1.15	-3.26	0.0007	0.12144	yes	DOWN	N	N	Y	Y	Y	11	1.14
ENSRNOG00000012176.L01	84590	Rab27b	RAB27B, member RAS oncogene family [Source:RGD Symbol;Acc:620114]	19.4	5.69	-1.77	0.00075	0.12144	yes	DOWN	N	N	Y	Y	Y	19.5	5.66
ENSRNOG00000022353.L01	292848	Klk13	kallikrein related-peptidase 13 [Source:RGD Symbol;Acc:1309337]	22.8	0.744	-4.94	0.00095	0.136047	yes	DOWN	N	N	Y	Y	Y	22.92	0.74
ENSRNOG00000015321	294119	Moxd1	monooxygenase, DBH-like 1 [Source:RGD Symbol;Acc:1310033]	10.7	1.18	-3.18	0.001	0.139693	yes	DOWN	N	N	Y	Y	Y	10.74	1.17
ENSRNOG00000025603.L01	301269	Gpr111	G protein-coupled receptor 111 [Source:RGD Symbol;Acc:1306718]	5.71	0.496	-3.52	0.001	0.139693	yes	DOWN	N	N	Y	Y	Y	5.74	0.49
ENSRNOG00000021134.L01	689830	Anxa9	annexin A9 [Source:RGD Symbol;Acc:1587550]	27	4.69	-2.53	0.001	0.139693	yes	DOWN	N	N	Y	Y	Y	27.14	4.66
ENSRNOG00000011925.L01	315829	Fam83b	family with sequence similarity 83, member B [Source:RGD Symbol;Acc:1311988]	9.37	2.19	-2.1	0.00105	0.1449	yes	DOWN	N	N	Y	Y	Y	9.42	2.18
ENSRNOG00000025332.L01	363104	Cd109	CD109 molecule [Source:RGD Symbol;Acc:1311287]	12.6	2.17	-2.53	0.00105	0.1449	yes	DOWN	N	N	Y	Y	Y	12.62	2.16
ENSRNOG00000016397.L01	300682	Tmprss13	transmembrane protease, serine 13 [Source:RGD Symbol;Acc:1310872]	20.4	5.26	-1.95	0.00125	0.170434	yes	DOWN	N	N	Y	Y	Y	20.49	5.24
ENSRNOG00000032959	171178	Adh7	alcohol dehydrogenase 7 (class IV), mu or sigma polypeptide [Source:RGD Symbol;Acc:621638]	198	54.9	-1.85	0.0013	0.176196	yes	DOWN	N	N	Y	Y	Y	198.77	54.68
ENSRNOG00000013057.L01	308761	Prc1	protein regulator of cytokinesis 1 [Source:RGD Symbol;Acc:1311754]	16.8	3.16	-2.41	0.00135	0.181891	yes	DOWN	N	N	Y	Y	Y	16.84	3.14
ENSRNOG00000003304	29195	Chad	chondroadherin [Source:RGD Symbol;Acc:2336]	149	14.8	-3.33	0.0014	0.185486	yes	DOWN	N	N	Y	Y	Y	149.76	14.7
ENSRNOG00000008892.L01	290027	Parp2	poly (ADP-ribose) polymerase 2 [Source:RGD Symbol;Acc:1310568]	72.8	20.5	-1.83	0.00145	0.185486	yes	DOWN	N	N	Y	Y	Y	73.2	20.36
ENSRNOG00000012821.L01	81512	Lect1	leukocyte cell derived chemotaxin 1 [Source:RGD Symbol;Acc:620176]	22.8	1.14	-4.33	0.0016	0.203531	yes	DOWN	N	N	Y	Y	Y	22.88	1.13
ENSRNOG00000001923.L01	360731	Tprg1	tumor protein p63 regulated 1 [Source:RGD Symbol;Acc:1306226]	12.8	0.638	-4.32	0.00165	0.208725	yes	DOWN	N	N	Y	Y	Y	12.83	0.64
ENSRNOG00000020669.L02	309164	Ovol1	ovo-like zinc finger 1 [Source:RGD Symbol;Acc:1306956]	37.6	7.8	-2.27	0.0019	0.239022	yes	DOWN	N	N	Y	Y	Y	37.82	7.77
ENSRNOG00000048953.L01	100911797	Spink5	serine peptidase inhibitor, Kazal type 5 [Source:RGD Symbol;Acc:1306540]	5.77	0.598	-3.27	0.00195	0.243964	yes	DOWN	N	N	Y	Y	Y	5.79	0.6
ENSRNOG00000013932.L01	24710	Rbp2	retinol binding protein 2, cellular [Source:RGD Symbol;Acc:3544]	36	2.41	-3.9	0.00205	0.253688	yes	DOWN	N	N	Y	Y	Y	36.21	2.39
ENSRNOG00000017140.L01	689949	Zfp185	zinc finger protein 185 [Source:RGD Symbol;Acc:1586351]	28.5	9.65	-1.56	0.00205	0.253688	yes	DOWN	N	N	Y	Y	Y	28.66	9.6
ENSRNOG00000010866.L01	361972	Tmem154	transmembrane protein 154 [Source:RGD Symbol;Acc:1563262]	28.8	7.82	-1.88	0.00215	0.263653	yes	DOWN	N	N	Y	Y	Y	28.92	7.79
ENSRNOG00000005336	287108	Prss27	protease, serine 27 [Source:RGD Symbol;Acc:1303256]	35.5	7.08	-2.33	0.0022	0.263653	yes	DOWN	N	N	Y	Y	Y	35.62	7.04
ENSRNOG00000011907.L01	287678	Krt23	keratin 23 (histone deacetylase inducible) [Source:RGD Symbol;Acc:1308838]	114	28.9	-1.99	0.0022	0.263653	yes	DOWN	N	N	Y	Y	Y	114.96	28.74
ENSRNOG00000005345	24877	Vsnl1	visinin-like 1 [Source:RGD Symbol;Acc:3966]	25	5.02	-2.32	0.00225	0.266836	yes	DOWN	N	N	Y	Y	Y	25.13	5
ENSRNOG00000012671.L01	307893	Gan	gigaxonin [Source:RGD Symbol;Acc:1307766]	7.99	2.66	-1.59	0.00225	0.266836	yes	DOWN	N	N	Y	Y	Y	8.03	2.65
ENSRNOG00000018459.L01	64133	Xylt1	xylosyltransferase 1 [Source:RGD Symbol;Acc:620093]	4.81	1.22	-1.97	0.0025	0.291776	yes	DOWN	N	N	Y	Y	Y	4.83	1.22
ENSRNOG00000019184.L01	25339	Npr3	natriuretic peptide receptor 3 [Source:RGD Symbol;Acc:3196]	13.7	3.69	-1.9	0.00255	0.291776	yes	DOWN	N	N	Y	Y	Y	13.81	3.67
ENSRNOG00000026844.L01	691259	Lypd8	LY6/PLAUR domain containing 8 [Source:RGD Symbol;Acc:1586251]	37.7	1.65	-4.51	0.00255	0.291776	yes	DOWN	N	N	Y	Y	Y	37.86	1.65
ENSRNOG00000050251	302884	MGC105649	hypothetical LOC302884 [Source:RGD Symbol;Acc:1359583]	75.9	22.4	-1.76	0.0028	0.311005	yes	DOWN	N	N	Y	Y	Y	76.25	22.28
ENSRNOG00000013729.L01	312246	RGD1306271	similar to KIAA1549 protein [Source:RGD Symbol;Acc:1306271]	6.42	0.718	-3.16	0.0028	0.311005	yes	DOWN	N	N	Y	Y	Y	6.45	0.71
ENSRNOG00000022684	25236	Gpc3	glypican 3 [Source:RGD Symbol;Acc:2725]	99.3	33.8	-1.55	0.00285	0.3135	yes	DOWN	N	N	Y	Y	Y	99.79	33.64
ENSRNOG00000012318.L01	289054	Aspm	asp (abnormal spindle) homolog, microcephaly associated (Drosophila) [Source:RGD Symbol;Acc:1307111]	5.21	1.28	-2.03	0.00285	0.3135	yes	DOWN	N	N	Y	Y	Y	5.24	1.27
ENSRNOG00000023316.L01	313993	Grhl1	grainyhead-like 1 (Drosophila) [Source:RGD Symbol;Acc:1305735]	37.6	12	-1.65	0.00295	0.32294	yes	DOWN	N	N	Y	Y	Y	37.75	11.91
ENSRNOG00000024237.L01	361086	Scel	sciellin [Source:RGD Symbol;Acc:1305102]	71.2	25.1	-1.5	0.00305	0.332289	yes	DOWN	N	N	Y	Y	Y	71.52	24.97
ENSRNOG00000022710.L01	499847	Prrg4	proline rich Gla (G-carboxyglutamic acid) 4 (transmembrane) [Source:RGD Symbol;Acc:1560542]	19.2	6.32	-1.6	0.0031	0.336129	yes	DOWN	N	N	Y	Y	Y	19.28	6.29
ENSRNOG00000019422	24330	Egr1	early growth response 1 [Source:RGD Symbol;Acc:2544]	58.9	18.9	-1.64	0.0032	0.343698	yes	DOWN	N	N	Y	Y	Y	59.16	18.77
ENSRNOG00000028108.L01	498392	Cytl1	cytokine like 1 [Source:RGD Symbol;Acc:1561846]	150	52.4	-1.51	0.00325	0.344198	yes	DOWN	N	N	Y	Y	Y	150.43	52.15
ENSRNOG00000014166.L01	100910861	Smoc2	SPARC related modular calcium binding 2 [Source:RGD Symbol;Acc:1306681]	8.71	1.2	-2.86	0.00325	0.344198	yes	DOWN	N	N	Y	Y	Y	8.75	1.2
ENSRNOG00000009797	65133	Aqp3	aquaporin 3 [Source:RGD Symbol;Acc:68428]	767	177	-2.12	0.0033	0.344683	yes	DOWN	N	N	Y	Y	Y	770.67	175.75
ENSRNOG00000049585.L01	116640	Tnc	tenascin C [Source:RGD Symbol;Acc:621057]	9.86	1.6	-2.63	0.0033	0.344683	yes	DOWN	N	N	Y	Y	Y	9.9	1.59
ENSRNOG00000011502	100910741	Col9a2	collagen, type IX, alpha 2 [Source:RGD Symbol;Acc:1307029]	28.8	9.37	-1.62	0.0033	0.344683	yes	DOWN	N	N	Y	Y	Y	28.9	9.32
ENSRNOG00000000323.L01	309871	Prdm1	PR domain containing 1, with ZNF domain [Source:RGD Symbol;Acc:1311765]	5.98	1.04	-2.53	0.0034	0.3519	yes	DOWN	N	N	Y	Y	Y	6.01	1.03
ENSRNOG00000013823.L01	499174	Cers3	ceramide synthase 3 [Source:RGD Symbol;Acc:1564356]	6.96	0.791	-3.14	0.00345	0.353858	yes	DOWN	N	N	Y	Y	Y	7	0.79
ENSRNOG00000002403.L01	63912	Fam129a	family with sequence similarity 129, member A [Source:RGD Symbol;Acc:71088]	41.8	14	-1.58	0.00355	0.35926	yes	DOWN	N	N	Y	Y	Y	41.97	13.9
ENSRNOG00000016810.L01	303471	Stmn1	stathmin 1 [Source:RGD Symbol;Acc:2992]	80.4	27.4	-1.55	0.00355	0.35926	yes	DOWN	N	N	Y	Y	Y	80.76	27.24
ENSRNOG00000005715.L01	286994	Lgr4	leucine-rich repeat-containing G protein-coupled receptor 4 [Source:RGD Symbol;Acc:628615]	64.5	22.6	-1.51	0.00375	0.372871	yes	DOWN	N	N	Y	Y	Y	64.78	22.45
ENSRNOG00000008676.L01	25314	Emp1	epithelial membrane protein 1 [Source:RGD Symbol;Acc:2552]	775	152	-2.35	0.00395	0.387679	yes	DOWN	N	N	Y	Y	Y	778.75	150.81
ENSRNOG00000023828.L01	680875	LOC680875	similar to dystonin isoform 1 [Source:RGD Symbol;Acc:1587008]	56.2	13.9	-2.01	0.00435	0.416174	yes	DOWN	N	N	Y	Y	Y	56.45	13.84
ENSRNOG00000010076.L01	304822	Pkp1	plakophilin 1 [Source:RGD Symbol;Acc:1307472]	150	47.4	-1.66	0.00475	0.422771	yes	DOWN	N	N	Y	Y	Y	150.34	47.18
ENSRNOG00000001925.L01	288016	Leprel1	leprecan-like 1 [Source:RGD Symbol;Acc:1304568]	27.9	9.23	-1.6	0.0048	0.422771	yes	DOWN	N	N	Y	Y	Y	28.03	9.18
ENSRNOG00000011381	171410	Acsbg1	acyl-CoA synthetase bubblegum family member 1 [Source:RGD Symbol;Acc:708557]	12.3	2.43	-2.33	0.00485	0.422771	yes	DOWN	N	N	Y	Y	Y	12.31	2.42
ENSRNOG00000042603.L01	298186	Ttc39b	tetratricopeptide repeat domain 39B [Source:RGD Symbol;Acc:1305797]	9.74	3.09	-1.66	0.0054	0.422771	yes	DOWN	N	N	Y	Y	Y	9.79	3.07
ENSRNOG00000005743	362136	Dapl1	death associated protein-like 1 [Source:RGD Symbol;Acc:1309610]	285	98.2	-1.53	0.0054	0.422771	yes	DOWN	N	N	Y	Y	Y	285.99	97.77
ENSRNOG00000033933	288075	Stfa3	stefin A3 [Source:RGD Symbol;Acc:1307831]	110	7.55	-3.87	0.00545	0.422771	yes	DOWN	N	N	Y	Y	Y	110.66	7.52
ENSRNOG00000013140.L01	65034	Pdzd2	PDZ domain containing 2 [Source:RGD Symbol;Acc:619958]	14	5.37	-1.38	0.0055	0.422771	yes	DOWN	N	N	Y	Y	Y	14.03	5.35
ENSRNOG00000018276.L01	499166	Mgat4a	mannosyl (alpha-1,3-)-glycoprotein beta-1,4-N-acetylglucosaminyltransferase, isozyme A [Source:RGD Symbol;Acc:1305650]	23.9	9.14	-1.38	0.00585	0.422771	yes	DOWN	N	N	Y	Y	Y	23.97	9.09
ENSRNOG00000011160.L01	117556	Sv2b	synaptic vesicle glycoprotein 2b [Source:RGD Symbol;Acc:619716]	4.24	0.412	-3.36	0.00595	0.422771	yes	DOWN	N	N	Y	Y	Y	4.27	0.41
ENSRNOG00000005932.L01	313270	Megf9	multiple EGF-like-domains 9 [Source:RGD Symbol;Acc:1308330]	14.1	5.1	-1.47	0.00605	0.422771	yes	DOWN	N	N	Y	Y	Y	14.14	5.07
ENSRNOG00000005404.L01	29434	Rasgrp1	RAS guanyl releasing protein 1 (calcium and DAG-regulated) [Source:RGD Symbol;Acc:3539]	12.5	4.26	-1.55	0.00615	0.422771	yes	DOWN	N	N	Y	Y	Y	12.51	4.24
ENSRNOG00000003031.L01	29600	Atp2b4	ATPase, Ca++ transporting, plasma membrane 4 [Source:RGD Symbol;Acc:621305]	11	4.03	-1.45	0.00615	0.422771	yes	DOWN	N	N	Y	Y	Y	11.03	4.01
ENSRNOG00000009339.L01	362044	Cenpe	centromere protein E [Source:RGD Symbol;Acc:1307115]	2.4	0.559	-2.1	0.00625	0.422771	yes	DOWN	N	N	Y	Y	Y	2.41	0.56
ENSRNOG00000002302.L01	289596	Corin	corin, serine peptidase [Source:RGD Symbol;Acc:727887]	4.15	0.513	-3.01	0.00655	0.422771	yes	DOWN	N	N	Y	Y	Y	4.17	0.51
ENSRNOG00000021274.L01	296179	Fermt1	fermitin family member 1 [Source:RGD Symbol;Acc:1306816]	14	4.93	-1.51	0.00665	0.422771	yes	DOWN	N	N	Y	Y	Y	14.08	4.91
ENSRNOG00000030170.L01	450225	Krt10	keratin 10 [Source:RGD Symbol;Acc:1359092]	12.8	3.33	-1.94	0.00665	0.422771	yes	DOWN	N	N	Y	Y	Y	12.84	3.31
ENSRNOG00000021140.L01	116489	Kcnk4	potassium channel, subfamily K, member 4 [Source:RGD Symbol;Acc:621449]	14.7	4.93	-1.58	0.0067	0.422771	yes	DOWN	N	N	Y	Y	Y	14.8	4.9
ENSRNOG00000015076.L01	312495	Cyp26b1	cytochrome P450, family 26, subfamily b, polypeptide 1 [Source:RGD Symbol;Acc:631379]	9.01	2.56	-1.81	0.0069	0.422771	yes	DOWN	N	N	Y	Y	Y	9.06	2.55
ENSRNOG00000031232.L01	81527	Nrp2	neuropilin 2 [Source:RGD Symbol;Acc:621442]	7.69	2.59	-1.57	0.007	0.422771	yes	DOWN	N	N	Y	Y	Y	7.73	2.58
ENSRNOG00000017775.L01	25552	Slc5a1	solute carrier family 5 (sodium/glucose cotransporter), member 1 [Source:RGD Symbol;Acc:3713]	5.94	1.38	-2.1	0.00705	0.422771	yes	DOWN	N	N	Y	Y	Y	5.97	1.38
ENSRNOG00000027157.L01	406866	Ly6g6e	lymphocyte antigen 6 complex, locus G6E [Source:RGD Symbol;Acc:1303112]	76	18.6	-2.03	0.00705	0.422771	yes	DOWN	N	N	Y	Y	Y	76.41	18.52
ENSRNOG00000007906.L01	171576	Bub1b	BUB1 mitotic checkpoint serine/threonine kinase B [Source:RGD Symbol;Acc:619791]	5.74	0.91	-2.66	0.00735	0.422771	yes	DOWN	N	N	Y	Y	Y	5.77	0.91
ENSRNOG00000018646	25433	Hbegf	heparin-binding EGF-like growth factor [Source:RGD Symbol;Acc:2526]	17.7	3.3	-2.42	0.00745	0.422771	yes	DOWN	N	N	Y	Y	Y	17.75	3.28
ENSRNOG00000028261.L01	361466	Tppp	tubulin polymerization promoting protein [Source:RGD Symbol;Acc:1310121]	33.2	13	-1.35	0.00745	0.422771	yes	DOWN	N	N	Y	Y	Y	33.35	12.94
ENSRNOG00000007030.L01	171287	Epha7	Eph receptor A7 [Source:RGD Symbol;Acc:70957]	9.8	3.56	-1.46	0.00755	0.422771	yes	DOWN	N	N	Y	Y	Y	9.85	3.55
ENSRNOG00000019939.L01	64033	Ccnd2	cyclin D2 [Source:RGD Symbol;Acc:621083]	140	45	-1.64	0.0076	0.422771	yes	DOWN	N	N	Y	Y	Y	140.49	44.79
ENSRNOG00000022268.L01	362972	Pnpla3	patatin-like phospholipase domain containing 3 [Source:RGD Symbol;Acc:1595843]	11.4	3.08	-1.89	0.00785	0.422771	yes	DOWN	N	N	Y	Y	Y	11.48	3.06
ENSRNOG00000010841.L01	313592	Col8a2	collagen, type VIII, alpha 2 [Source:RGD Symbol;Acc:1305182]	9.1	2.36	-1.95	0.00795	0.422771	yes	DOWN	N	N	Y	Y	Y	9.15	2.35
ENSRNOG00000018929.L01	309523	Kif20b	kinesin family member 20B [Source:RGD Symbol;Acc:1308497]	2.5	0.456	-2.46	0.00825	0.422771	yes	DOWN	N	N	Y	Y	Y	2.51	0.45
ENSRNOG00000001514	311742	Cdca7	cell division cycle associated 7 [Source:RGD Symbol;Acc:1309363]	33.7	12.1	-1.48	0.00835	0.422771	yes	DOWN	N	N	Y	Y	Y	33.84	12.05
ENSRNOG00000015075.L01	81801	Stc1	stanniocalcin 1 [Source:RGD Symbol;Acc:621776]	6.26	1.17	-2.42	0.00845	0.422771	yes	DOWN	N	N	Y	Y	Y	6.3	1.16
ENSRNOG00000002002.L01	365265	Tmprss11bnl	transmembrane protease, serine 11B N terminal like [Source:RGD Symbol;Acc:1303278]	70.1	25.7	-1.45	0.00845	0.422771	yes	DOWN	N	N	Y	Y	Y	70.42	25.62
ENSRNOG00000045531	498650	Rab11fip1	RAB11 family interacting protein 1 (class I) [Source:EntrezGene;Acc:498650]	52.7	19.7	-1.42	0.00845	0.422771	yes	DOWN	N	N	Y	Y	Y	52.93	19.59
ENSRNOG00000003038.L01	360868	Sft2d2	SFT2 domain containing 2 [Source:RGD Symbol;Acc:1310623]	65.4	19.2	-1.77	0.00865	0.422771	yes	DOWN	N	N	Y	Y	Y	65.73	19.14
ENSRNOG00000001739	288038	Mfi2	antigen p97 (melanoma associated) identified by monoclonal antibodies 133.2 and 96.5 [Source:RGD Symbol;Acc:1308155]	3.34	0.514	-2.7	0.0087	0.422771	yes	DOWN	N	N	Y	Y	Y	3.35	0.51
ENSRNOG00000043219.L01	689008	Fbn2	fibrillin 2 [Source:RGD Symbol;Acc:620910]	2.65	0.73	-1.86	0.0087	0.422771	yes	DOWN	N	N	Y	Y	Y	2.67	0.73
ENSRNOG00000015921	691979	Esco2	establishment of sister chromatid cohesion N-acetyltransferase 2 [Source:RGD Symbol;Acc:1593313]	3.04	0.486	-2.64	0.00885	0.422771	yes	DOWN	N	N	Y	Y	Y	3.05	0.48
ENSRNOG00000025293	408241	Prss57	protease, serine, 57 [Source:RGD Symbol;Acc:1303330]	1.13	0	#NAME?	0.009	0.422771	yes	DOWN	N	N	Y	Y	Y	1.13	0
ENSRNOG00000016552.L01	29637	Hmgcs1	3-hydroxy-3-methylglutaryl-CoA synthase 1 (soluble) [Source:RGD Symbol;Acc:70970]	31.5	12.3	-1.36	0.00915	0.422771	yes	DOWN	N	N	Y	Y	Y	31.66	12.26
ENSRNOG00000004487.L01	690209	Nek2	NIMA-related kinase 2 [Source:RGD Symbol;Acc:619792]	2.48	0.226	-3.46	0.0092	0.422771	yes	DOWN	N	N	Y	Y	Y	2.5	0.22
ENSRNOG00000046667.L01	100360880	Fosb	FBJ osteosarcoma oncogene B [Source:RGD Symbol;Acc:1308198]	15.7	5.85	-1.42	0.00935	0.422771	yes	DOWN	N	N	Y	Y	Y	15.76	5.82
ENSRNOG00000033618.L01	312115	Col28a1	collagen, type XXVIII, alpha 1 [Source:RGD Symbol;Acc:1564680]	4.71	0.941	-2.32	0.00945	0.422771	yes	DOWN	N	N	Y	Y	Y	4.73	0.94
ENSRNOG00000010667.L01	362713	Ept1	ethanolaminephosphotransferase 1 (CDP-ethanolamine-specific) [Source:RGD Symbol;Acc:1560938]	27	9.46	-1.51	0.00955	0.422771	yes	DOWN	N	N	Y	Y	Y	27.17	9.42
ENSRNOG00000025654.L01	301266	Gpr110	G protein-coupled receptor 110 [Source:RGD Symbol;Acc:1310285]	3.89	0.4	-3.28	0.0097	0.422771	yes	DOWN	N	N	Y	Y	Y	3.91	0.4
ENSRNOG00000011427.L01	60563	Hr	hair growth associated [Source:RGD Symbol;Acc:620634]	41.6	16.3	-1.35	0.00975	0.422771	yes	DOWN	N	N	Y	Y	Y	41.8	16.19
ENSRNOG00000000521.L01	114851	Cdkn1a	cyclin-dependent kinase inhibitor 1A [Source:RGD Symbol;Acc:69328]	73.2	29.4	-1.32	0.00985	0.422771	yes	DOWN	N	N	Y	Y	Y	73.6	29.28
ENSRNOG00000013994.L01	85496	Enpp1	ectonucleotide pyrophosphatase/phosphodiesterase 1 [Source:RGD Symbol;Acc:628825]	14.7	5.09	-1.53	0.0101	0.422771	yes	DOWN	N	N	N	Y	Y	14.79	5.07
ENSRNOG00000008450	100359539	LOC100359539	ribonucleotide reductase M2 polypeptide [Source:RGD Symbol;Acc:2323655]	8.18	1.67	-2.29	0.01015	0.422771	yes	DOWN	N	N	N	Y	Y	8.22	1.66
ENSRNOG00000038572.L01	305392	Ncapg	non-SMC condensin I complex, subunit G [Source:RGD Symbol;Acc:1562646]	3.12	0.645	-2.28	0.0102	0.422771	yes	DOWN	N	N	N	Y	Y	3.14	0.64
ENSRNOG00000001192	288707	Gltp	glycolipid transfer protein [Source:RGD Symbol;Acc:1564442]	189	73.9	-1.35	0.01025	0.422771	yes	DOWN	N	N	N	Y	Y	189.76	73.49
ENSRNOG00000023272	362720	Rrm2	ribonucleotide reductase M2 [Source:RGD Symbol;Acc:1598310]	12.4	1.97	-2.65	0.0103	0.422771	yes	DOWN	N	N	N	Y	Y	12.45	1.96
ENSRNOG00000047314.L01	24834	Tk1	thymidine kinase 1, soluble [Source:RGD Symbol;Acc:621014]	18.3	3.69	-2.31	0.0106	0.422771	yes	DOWN	N	N	N	Y	Y	18.35	3.67
ENSRNOG00000004968.L01	362798	Ncapg2	non-SMC condensin II complex, subunit G2 [Source:RGD Symbol;Acc:1308406]	4.12	1.03	-2	0.01065	0.422771	yes	DOWN	N	N	N	Y	Y	4.14	1.03
ENSRNOG00000016122	25675	Hmgcr	3-hydroxy-3-methylglutaryl-CoA reductase [Source:RGD Symbol;Acc:2803]	29.6	12	-1.3	0.01085	0.422771	yes	DOWN	N	N	N	Y	Y	29.72	11.95
ENSRNOG00000004188.L01	298795	LOC298795	similar to 14-3-3 protein sigma [Source:RGD Symbol;Acc:1359510]	26.8	6.85	-1.97	0.01095	0.422771	yes	DOWN	N	N	N	Y	Y	26.88	6.81
ENSRNOG00000008161.L01	81916	Pdzk1ip1	PDZK1 interacting protein 1 [Source:RGD Symbol;Acc:620952]	86.9	31.2	-1.48	0.0112	0.422771	yes	DOWN	N	N	N	Y	Y	87.28	31.04
ENSRNOG00000005660.L01	500638	Fam110c	family with sequence similarity 110, member C [Source:RGD Symbol;Acc:1564713]	27.7	10.8	-1.35	0.0117	0.422771	yes	DOWN	N	N	N	Y	Y	27.79	10.79
ENSRNOG00000008806.L01	298801	Clip4	CAP-GLY domain containing linker protein family, member 4 [Source:RGD Symbol;Acc:1311049]	51.1	21.1	-1.28	0.0119	0.422771	yes	DOWN	N	N	N	Y	Y	51.38	21.02
ENSRNOG00000017882.L01	307124	Camk1d	calcium/calmodulin-dependent protein kinase ID [Source:RGD Symbol;Acc:1560691]	11.5	4.55	-1.34	0.0119	0.422771	yes	DOWN	N	N	N	Y	Y	11.55	4.53
ENSRNOG00000017163	60416	Pfkp	phosphofructokinase, platelet [Source:RGD Symbol;Acc:61893]	17.1	5.94	-1.53	0.01195	0.422771	yes	DOWN	N	N	N	Y	Y	17.21	5.91
ENSRNOG00000022116.L01	84403	Gjb6	gap junction protein, beta 6 [Source:RGD Symbol;Acc:621830]	6.89	0.867	-2.99	0.012	0.422771	yes	DOWN	N	N	N	Y	Y	6.92	0.86
ENSRNOG00000008115.L01	296060	Arhgap11a	Rho GTPase activating protein 11A [Source:RGD Symbol;Acc:1309107]	6.8	2.05	-1.73	0.0121	0.423872	yes	DOWN	N	N	N	Y	Y	6.83	2.04
ENSRNOG00000002227.L01	64030	Kit	v-kit Hardy-Zuckerman 4 feline sarcoma viral oncogene homolog [Source:RGD Symbol;Acc:620568]	17.9	7.31	-1.29	0.01215	0.42497	yes	DOWN	N	N	N	Y	Y	18	7.28
ENSRNOG00000029543	83681	Cish	cytokine inducible SH2-containing protein [Source:RGD Symbol;Acc:69261]	23.5	7.75	-1.6	0.0123	0.428243	yes	DOWN	N	N	N	Y	Y	23.6	7.71
ENSRNOG00000013167	100912122	Hmgb2	high mobility group box 2 [Source:RGD Symbol;Acc:69291]	85.8	33.3	-1.37	0.0123	0.428243	yes	DOWN	N	N	N	Y	Y	86.14	33.14
ENSRNOG00000032231.L01	100359562	Mroh6	maestro heat-like repeat family member 6 [Source:RGD Symbol;Acc:2323632]	27.8	11.1	-1.32	0.0127	0.437885	yes	DOWN	N	N	N	Y	Y	27.97	11.07
ENSRNOG00000018635.L01	25203	Ccnb1	cyclin B1 [Source:RGD Symbol;Acc:2291]	13.6	2.88	-2.23	0.01275	0.437885	yes	DOWN	N	N	N	Y	Y	13.62	2.87
ENSRNOG00000001031.L01	25503	Ocm2	oncomodulin 2 [Source:RGD Symbol;Acc:3222]	58.8	19.4	-1.6	0.01275	0.437885	yes	DOWN	N	N	N	Y	Y	59.08	19.34
ENSRNOG00000014578.L01	64190	Fxyd4	FXYD domain-containing ion transport regulator 4 [Source:RGD Symbol;Acc:70998]	90	30.5	-1.56	0.01275	0.437885	yes	DOWN	N	N	N	Y	Y	90.44	30.31
ENSRNOG00000046500.L01	292708	Irgq	immunity-related GTPase family, Q [Source:RGD Symbol;Acc:1309409]	19.8	8.17	-1.28	0.013	0.444459	yes	DOWN	N	N	N	Y	Y	19.91	8.13
ENSRNOG00000012442.L01	308797	Cemip	cell migration inducing protein, hyaluronan binding [Source:RGD Symbol;Acc:1305254]	2.16	0.239	-3.18	0.013	0.444459	yes	DOWN	N	N	N	Y	Y	2.17	0.24
ENSRNOG00000005871.L01	60582	Il1rn	interleukin 1 receptor antagonist [Source:RGD Symbol;Acc:621159]	22.9	7.8	-1.56	0.0131	0.446904	yes	DOWN	N	N	N	Y	Y	23.06	7.76
ENSRNOG00000013771.L01	308016	Clca2	chloride channel accessory 2 [Source:RGD Symbol;Acc:1304894]	86.9	34.7	-1.33	0.0134	0.452697	yes	DOWN	N	N	N	Y	Y	87.31	34.51
ENSRNOG00000004921.L01	311336	Nusap1	nucleolar and spindle associated protein 1 [Source:RGD Symbol;Acc:1305764]	7.59	1.71	-2.15	0.01345	0.453713	yes	DOWN	N	N	N	Y	Y	7.62	1.7
ENSRNOG00000018716.L01	295333	Dennd2c	DENN/MADD domain containing 2C [Source:RGD Symbol;Acc:1308197]	13.7	5.3	-1.37	0.0135	0.454726	yes	DOWN	N	N	N	Y	Y	13.78	5.28
ENSRNOG00000004332.L01	24329	Egfr	epidermal growth factor receptor [Source:RGD Symbol;Acc:2543]	13.8	5.82	-1.25	0.0136	0.457418	yes	DOWN	N	N	N	Y	Y	13.89	5.79
ENSRNOG00000018525.L01	266612	Slc4a9	solute carrier family 4, sodium bicarbonate cotransporter, member 9 [Source:RGD Symbol;Acc:628811]	4.36	0.639	-2.77	0.01365	0.458423	yes	DOWN	N	N	N	Y	Y	4.38	0.64
ENSRNOG00000010529.L01	292406	Thbs2	thrombospondin 2 [Source:RGD Symbol;Acc:1310979]	2.55	0.42	-2.6	0.01375	0.460423	yes	DOWN	N	N	N	Y	Y	2.56	0.42
ENSRNOG00000003705.L01	367786	Bmx	BMX non-receptor tyrosine kinase [Source:RGD Symbol;Acc:1565643]	53.9	16.6	-1.7	0.0138	0.461419	yes	DOWN	N	N	N	Y	Y	54.13	16.48
ENSRNOG00000017208	81651	Cspg4	chondroitin sulfate proteoglycan 4 [Source:RGD Symbol;Acc:619942]	4.74	1.68	-1.5	0.014	0.467419	yes	DOWN	N	N	N	Y	Y	4.76	1.67
ENSRNOG00000017164.L01	292130	Afap1l2	actin filament associated protein 1-like 2 [Source:RGD Symbol;Acc:1310668]	16.7	6.87	-1.28	0.0142	0.47202	yes	DOWN	N	N	N	Y	Y	16.79	6.84
ENSRNOG00000003526.L01	140594	Sytl4	synaptotagmin-like 4 [Source:RGD Symbol;Acc:620204]	21.6	9.04	-1.26	0.01425	0.472992	yes	DOWN	N	N	N	Y	Y	21.7	9
ENSRNOG00000013808.L01	291952	Ces2g	carboxylesterase 2G [Source:RGD Symbol;Acc:1308358]	34.4	12.5	-1.46	0.0143	0.473143	yes	DOWN	N	N	N	Y	Y	34.59	12.43
ENSRNOG00000009076.L01	296349	Ttpal	tocopherol (alpha) transfer protein-like [Source:RGD Symbol;Acc:1305754]	10.5	3.9	-1.43	0.01435	0.473143	yes	DOWN	N	N	N	Y	Y	10.58	3.88
ENSRNOG00000013228	64458	Scrg1	stimulator of chondrogenesis 1 [Source:RGD Symbol;Acc:68377]	1.26	0	#NAME?	0.0144	0.473143	yes	DOWN	N	N	N	Y	Y	1.27	0
ENSRNOG00000014080.L01	315740	Kif23	kinesin family member 23 [Source:RGD Symbol;Acc:1308596]	22.3	8.99	-1.31	0.0144	0.473143	yes	DOWN	N	N	N	Y	Y	22.37	8.94
ENSRNOG00000002583.L01	304689	Serpinb11	serpin peptidase inhibitor, clade B (ovalbumin), member 11 [Source:RGD Symbol;Acc:1306497]	15.7	4.35	-1.85	0.0146	0.477225	yes	DOWN	N	N	N	Y	Y	15.77	4.33
ENSRNOG00000026053	50566	Grem1	gremlin 1 [Source:RGD Symbol;Acc:2359]	8.03	1.43	-2.49	0.01465	0.477225	yes	DOWN	N	N	N	Y	Y	8.06	1.43
ENSRNOG00000029055.L01	315852	Ttk	Ttk protein kinase [Source:RGD Symbol;Acc:1305558]	2.76	0.362	-2.93	0.01465	0.477225	yes	DOWN	N	N	N	Y	Y	2.77	0.36
ENSRNOG00000026143.L01	680515	Ckap2l	cytoskeleton associated protein 2-like [Source:RGD Symbol;Acc:1590645]	5.26	1.04	-2.34	0.01465	0.477225	yes	DOWN	N	N	N	Y	Y	5.28	1.03
ENSRNOG00000015529.L01	297594	Cdca3	cell division cycle associated 3 [Source:RGD Symbol;Acc:1359093]	10.4	2.33	-2.16	0.0149	0.484676	yes	DOWN	N	N	N	Y	Y	10.46	2.32
ENSRNOG00000013380	171581	Rhov	ras homolog family member V [Source:RGD Symbol;Acc:628824]	56.9	23.8	-1.25	0.015	0.485846	yes	DOWN	N	N	N	Y	Y	57.16	23.72
ENSRNOG00000020901.L01	60399	S1pr5	sphingosine-1-phosphate receptor 5 [Source:RGD Symbol;Acc:620566]	34.3	13.4	-1.35	0.0155	0.492926	yes	DOWN	N	N	N	Y	Y	34.41	13.35
ENSRNOG00000012494.L01	308836	Kctd14	potassium channel tetramerization domain containing 14 [Source:RGD Symbol;Acc:1306430]	43.9	17.3	-1.35	0.0157	0.494452	yes	DOWN	N	N	N	Y	Y	44.09	17.17
ENSRNOG00000014361.L01	24323	Edn1	endothelin 1 [Source:RGD Symbol;Acc:2532]	24.6	8.77	-1.49	0.01575	0.495342	yes	DOWN	N	N	N	Y	Y	24.76	8.73
ENSRNOG00000010516.L01	25619	Plau	plasminogen activator, urokinase [Source:RGD Symbol;Acc:3343]	64.7	27.2	-1.25	0.01605	0.502003	yes	DOWN	N	N	N	Y	Y	64.97	27.11
ENSRNOG00000016581.L01	291091	Serpinb1a	serine (or cysteine) proteinase inhibitor, clade B, member 1a [Source:RGD Symbol;Acc:1306203]	265	113	-1.23	0.01605	0.502003	yes	DOWN	N	N	N	Y	Y	265.99	112.64
ENSRNOG00000006403.L01	192183	Pvrl1	poliovirus receptor-related 1 [Source:RGD Symbol;Acc:620791]	41.7	17.3	-1.27	0.0162	0.505307	yes	DOWN	N	N	N	Y	Y	41.92	17.2
ENSRNOG00000005464	360983	Lgalsl	lectin, galactoside-binding-like [Source:RGD Symbol;Acc:1307414]	70	29.9	-1.23	0.01625	0.505482	yes	DOWN	N	N	N	Y	Y	70.39	29.72
ENSRNOG00000026415.L01	314981	Col14a1	collagen, type XIV, alpha 1 [Source:RGD Symbol;Acc:1305806]	22.9	9.24	-1.31	0.0163	0.506345	yes	DOWN	N	N	N	Y	Y	23.03	9.2
ENSRNOG00000002771.L01	59325	Ereg	epiregulin [Source:RGD Symbol;Acc:620299]	3.09	0.129	-4.59	0.0165	0.509776	yes	DOWN	N	N	N	Y	Y	3.1	0.13
ENSRNOG00000042714.L01	501907	RGD1559459	similar to Expressed sequence AI788959 [Source:RGD Symbol;Acc:1559459]	6.95	2.47	-1.49	0.0168	0.514853	yes	DOWN	N	N	N	Y	Y	6.98	2.46
ENSRNOG00000033527.L01	313262	Pappa	pregnancy-associated plasma protein A [Source:RGD Symbol;Acc:1307742]	0.793	0.115	-2.79	0.0169	0.517222	yes	DOWN	N	N	N	Y	Y	0.8	0.11
ENSRNOG00000027592.L01	502916	Rerg	RAS-like, estrogen-regulated, growth-inhibitor [Source:RGD Symbol;Acc:1562829]	29.7	11.2	-1.4	0.01705	0.521112	yes	DOWN	N	N	N	Y	Y	29.82	11.2
ENSRNOG00000030264	362937	Fam83h	family with sequence similarity 83, member H [Source:RGD Symbol;Acc:1305866]	47.5	20.6	-1.2	0.0171	0.52194	yes	DOWN	N	N	N	Y	Y	47.74	20.52
ENSRNOG00000008165.L01	311546	Tpx2	TPX2, microtubule-associated [Source:RGD Symbol;Acc:1311894]	7.49	1.54	-2.28	0.01725	0.524409	yes	DOWN	N	N	N	Y	Y	7.52	1.53
ENSRNOG00000014859.L01	293561	Rnf152	ring finger protein 152 [Source:RGD Symbol;Acc:1305251]	2.8	0.869	-1.69	0.0173	0.525228	yes	DOWN	N	N	N	Y	Y	2.81	0.86
ENSRNOG00000015445.L01	25263	Mal	mal, T-cell differentiation protein [Source:RGD Symbol;Acc:3037]	190	78.4	-1.28	0.01745	0.528373	yes	DOWN	N	N	N	Y	Y	191.2	78
ENSRNOG00000019301.L01	309528	Lipm	lipase, family member M [Source:RGD Symbol;Acc:1304912]	9.51	1.83	-2.38	0.01745	0.528373	yes	DOWN	N	N	N	Y	Y	9.56	1.82
ENSRNOG00000019414.L01	310626	Tmem79	transmembrane protein 79 [Source:RGD Symbol;Acc:1309886]	20.5	7.64	-1.42	0.0177	0.533813	yes	DOWN	N	N	N	Y	Y	20.55	7.61
ENSRNOG00000013598.L01	362510	Melk	maternal embryonic leucine zipper kinase [Source:RGD Symbol;Acc:1308974]	3.03	0.407	-2.9	0.0178	0.536119	yes	DOWN	N	N	N	Y	Y	3.05	0.41
ENSRNOG00000009334	311325	Knstrn	kinetochore-localized astrin/SPAG5 binding protein [Source:RGD Symbol;Acc:1303240]	8.45	1.08	-2.97	0.01805	0.540077	yes	DOWN	N	N	N	Y	Y	8.49	1.07
ENSRNOG00000010098.L01	314260	Plek2	pleckstrin 2 [Source:RGD Symbol;Acc:1305786]	43.2	17.8	-1.28	0.0185	0.548496	yes	DOWN	N	N	N	Y	Y	43.43	17.74
ENSRNOG00000008645.L01	24484	Igfbp3	insulin-like growth factor binding protein 3 [Source:RGD Symbol;Acc:2874]	214	89.9	-1.25	0.01865	0.550792	yes	DOWN	N	N	N	Y	Y	215.4	89.47
ENSRNOG00000015275.L01	291441	Ska1	spindle and kinetochore associated complex subunit 1 [Source:RGD Symbol;Acc:1310784]	3.05	0.347	-3.14	0.0187	0.55084	yes	DOWN	N	N	N	Y	Y	3.07	0.35
ENSRNOG00000009945.L01	315926	Pls1	plastin 1 [Source:RGD Symbol;Acc:1307142]	23.2	9.68	-1.26	0.0187	0.55084	yes	DOWN	N	N	N	Y	Y	23.28	9.64
ENSRNOG00000021203.L01	309187	Atl3	atlastin GTPase 3 [Source:RGD Symbol;Acc:1309871]	35.7	15.2	-1.23	0.01885	0.554541	yes	DOWN	N	N	N	Y	Y	35.91	15.14
ENSRNOG00000021401.L01	500317	Lpar5	lysophosphatidic acid receptor 5 [Source:RGD Symbol;Acc:1562580]	7.25	1.29	-2.49	0.0194	0.564882	yes	DOWN	N	N	N	Y	Y	7.29	1.28
ENSRNOG00000010124.L01	361970	Trim2	tripartite motif-containing 2 [Source:RGD Symbol;Acc:1310981]	17.3	6.93	-1.32	0.01945	0.564893	yes	DOWN	N	N	N	Y	Y	17.42	6.9
ENSRNOG00000001960.L01	60393	Sult1d1	sulfotransferase family 1D, member 1 [Source:RGD Symbol;Acc:620491]	15.3	5.47	-1.48	0.0195	0.565624	yes	DOWN	N	N	N	Y	Y	15.35	5.45
ENSRNOG00000024650	691173	Ckap2	cytoskeleton associated protein 2 [Source:RGD Symbol;Acc:1311631]	6.71	1.64	-2.03	0.0198	0.57214	yes	DOWN	N	N	N	Y	Y	6.74	1.63
ENSRNOG00000009314.L01	60583	Ivl	involucrin [Source:RGD Symbol;Acc:620141]	2.04	0.296	-2.79	0.0199	0.5743	yes	DOWN	N	N	N	Y	Y	2.05	0.29
ENSRNOG00000010996.L02	360920	Mob1b	MOB kinase activator 1B [Source:RGD Symbol;Acc:1305114]	19.6	8.17	-1.26	0.01995	0.575015	yes	DOWN	N	N	N	Y	Y	19.73	8.13
ENSRNOG00000020784	499303	Kcnk7	potassium channel, subfamily K, member 7 [Source:RGD Symbol;Acc:1565025]	14	2.81	-2.32	0.02	0.575727	yes	DOWN	N	N	N	Y	Y	14.11	2.8
ENSRNOG00000012843.L01	246266	Aspg	asparaginase [Source:RGD Symbol;Acc:708388]	7.89	1.93	-2.03	0.02015	0.579313	yes	DOWN	N	N	N	Y	Y	7.92	1.92
ENSRNOG00000015030.L01	115769	Tjp2	tight junction protein 2 [Source:RGD Symbol;Acc:619807]	34.9	15.6	-1.16	0.02025	0.581453	yes	DOWN	N	N	N	Y	Y	35.04	15.5
ENSRNOG00000000632.L01	54237	Cdk1	cyclin-dependent kinase 1 [Source:RGD Symbol;Acc:2319]	16.2	4.22	-1.94	0.02045	0.584212	yes	DOWN	N	N	N	Y	Y	16.31	4.2
ENSRNOG00000014259.L01	298506	Mycl	v-myc avian myelocytomatosis viral oncogene lung carcinoma derived homolog [Source:RGD Symbol;Acc:1588591]	16.2	6.23	-1.38	0.0205	0.584212	yes	DOWN	N	N	N	Y	Y	16.3	6.2
ENSRNOG00000013894.L01	310443	Gpr87	G protein-coupled receptor 87 [Source:RGD Symbol;Acc:1307852]	22.3	7.63	-1.55	0.02055	0.584904	yes	DOWN	N	N	N	Y	Y	22.45	7.6
ENSRNOG00000023851.L01	295325	Igsf3	immunoglobulin superfamily, member 3 [Source:RGD Symbol;Acc:1307796]	6.15	2.41	-1.35	0.02065	0.587017	yes	DOWN	N	N	N	Y	Y	6.18	2.4
ENSRNOG00000011238.L01	310467	Tiparp	TCDD-inducible poly(ADP-ribose) polymerase [Source:RGD Symbol;Acc:1306171]	19.9	8.75	-1.18	0.02075	0.589124	yes	DOWN	N	N	N	Y	Y	19.99	8.71
ENSRNOG00000017156.L01	361122	Ankle1	ankyrin repeat and LEM domain containing 1 [Source:RGD Symbol;Acc:1308184]	5.3	1.47	-1.85	0.02085	0.589706	yes	DOWN	N	N	N	Y	Y	5.32	1.46
ENSRNOG00000016690.L01	89784	Idi1	isopentenyl-diphosphate delta isomerase 1 [Source:RGD Symbol;Acc:621835]	12.8	4.56	-1.48	0.0209	0.589706	yes	DOWN	N	N	N	Y	Y	12.83	4.54
ENSRNOG00000005655.L01	312913	Cpa6	carboxypeptidase A6 [Source:RGD Symbol;Acc:1311764]	3.91	0.597	-2.71	0.0209	0.589706	yes	DOWN	N	N	N	Y	Y	3.93	0.59
ENSRNOG00000011517.L01	316256	Tnfrsf21	tumor necrosis factor receptor superfamily, member 21 [Source:RGD Symbol;Acc:1307308]	40.4	18	-1.16	0.0211	0.59191	yes	DOWN	N	N	N	Y	Y	40.63	17.96
ENSRNOG00000018187	100909901	LOC100909901	rac GTPase-activating protein 1-like [Source:RGD Symbol;Acc:6501444]	4.57	0.933	-2.29	0.0211	0.59191	yes	DOWN	N	N	N	Y	Y	4.59	0.93
ENSRNOG00000009734.L01	286921	Akr1b8	aldo-keto reductase family 1, member B8 [Source:RGD Symbol;Acc:708475]	51.8	17.1	-1.6	0.0212	0.59191	yes	DOWN	N	N	N	Y	Y	52.08	16.98
ENSRNOG00000037845.L01	114099	Cysltr1	cysteinyl leukotriene receptor 1 [Source:RGD Symbol;Acc:619796]	2.85	0.731	-1.96	0.0214	0.59191	yes	DOWN	N	N	N	Y	Y	2.87	0.73
ENSRNOG00000022255.L01	305265	Tmprss11e	transmembrane protease, serine 11e [Source:RGD Symbol;Acc:1561698]	2.82	0.653	-2.11	0.0214	0.59191	yes	DOWN	N	N	N	Y	Y	2.83	0.65
ENSRNOG00000007740.L01	494343	Tacstd2	tumor-associated calcium signal transducer 2 [Source:RGD Symbol;Acc:1359498]	200	84.3	-1.25	0.02155	0.59191	yes	DOWN	N	N	N	Y	Y	200.85	83.91
ENSRNOG00000048800.L01	24413	Nr3c1	nuclear receptor subfamily 3, group C, member 1 [Source:RGD Symbol;Acc:2741]	25.1	9.57	-1.39	0.02165	0.593226	yes	DOWN	N	N	N	Y	Y	25.23	9.52
ENSRNOG00000005887.L01	680210	Psca	prostate stem cell antigen [Source:RGD Symbol;Acc:1594221]	143	49.5	-1.53	0.02165	0.593226	yes	DOWN	N	N	N	Y	Y	143.33	49.31
ENSRNOG00000023549.L01	365038	Samd5	sterile alpha motif domain containing 5 [Source:RGD Symbol;Acc:1311012]	7.48	2.46	-1.6	0.02175	0.595249	yes	DOWN	N	N	N	Y	Y	7.52	2.45
ENSRNOG00000013939	64389	Defb4	defensin beta 4 [Source:RGD Symbol;Acc:619944]	1.69	0	#NAME?	0.0221	0.599782	yes	DOWN	N	N	N	Y	Y	1.69	0
ENSRNOG00000000221.L01	316122	Abhd5	abhydrolase domain containing 5 [Source:RGD Symbol;Acc:1303237]	30.7	12.7	-1.27	0.0221	0.599782	yes	DOWN	N	N	N	Y	Y	30.85	12.64
ENSRNOG00000018405	680551	Apoc4	apolipoprotein C-IV [Source:RGD Symbol;Acc:70959]	0.955	0	#NAME?	0.0221	0.599782	yes	DOWN	N	N	N	Y	Y	0.96	0
ENSRNOG00000046900	100912564	Hist1h4b	histone cluster 1, H4b [Source:RGD Symbol;Acc:620814]	3.47	0	#NAME?	0.0221	0.599782	yes	DOWN	N	N	N	Y	Y	3.49	0
ENSRNOG00000009344.L01	299142	Syt16	synaptotagmin XVI [Source:RGD Symbol;Acc:1564654]	10.7	3.74	-1.52	0.02235	0.604406	yes	DOWN	N	N	N	Y	Y	10.79	3.72
ENSRNOG00000001427.L01	304592	Orai2	ORAI calcium release-activated calcium modulator 2 [Source:RGD Symbol;Acc:1310213]	9.03	3.38	-1.42	0.02255	0.608903	yes	DOWN	N	N	N	Y	Y	9.07	3.36
ENSRNOG00000016103.L01	308068	Nkd2	naked cuticle homolog 2 (Drosophila) [Source:RGD Symbol;Acc:1311459]	9.06	3.46	-1.39	0.0226	0.608903	yes	DOWN	N	N	N	Y	Y	9.1	3.45
ENSRNOG00000046005	100912469	LOC100912469	acyl-CoA desaturase 2-like [Source:RGD Symbol;Acc:6486472]	98.2	41.7	-1.23	0.02265	0.608903	yes	DOWN	N	N	N	Y	Y	98.65	41.51
ENSRNOG00000014441	303530	Krt16	keratin 16 [Source:RGD Symbol;Acc:1590901]	11.3	0.459	-4.62	0.02275	0.61087	yes	DOWN	N	N	N	Y	Y	11.3	0.46
ENSRNOG00000019564.L01	29211	Sptbn2	spectrin, beta, non-erythrocytic 2 [Source:RGD Symbol;Acc:3751]	16.6	7.21	-1.2	0.02305	0.617469	yes	DOWN	N	N	N	Y	Y	16.66	7.17
ENSRNOG00000037227.L01	24884	Yes1	Yamaguchi sarcoma viral (v-yes) oncogene homolog 1 [Source:RGD Symbol;Acc:3977]	21.6	9.07	-1.25	0.02315	0.619419	yes	DOWN	N	N	N	Y	Y	21.71	9.03
ENSRNOG00000012920.L01	305104	Col9a1	collagen, type IX, alpha 1 [Source:RGD Symbol;Acc:1309425]	6.63	0.197	-5.07	0.0232	0.620028	yes	DOWN	N	N	N	Y	Y	6.66	0.2
ENSRNOG00000020136.L01	60335	Tgm1	transglutaminase 1 [Source:RGD Symbol;Acc:61838]	44.6	20.4	-1.13	0.02355	0.628644	yes	DOWN	N	N	N	Y	Y	44.83	20.34
ENSRNOG00000015210.L01	408206	Ggt6	gamma-glutamyl transferase 6 [Source:RGD Symbol;Acc:1303335]	5.87	0.643	-3.19	0.0237	0.631168	yes	DOWN	N	N	N	Y	Y	5.89	0.64
ENSRNOG00000010701.L01	310074	Depdc1b	DEP domain containing 1B [Source:RGD Symbol;Acc:1305799]	2.26	0.35	-2.69	0.0238	0.633091	yes	DOWN	N	N	N	Y	Y	2.27	0.35
ENSRNOG00000034177.L01	116683	Efna5	ephrin A5 [Source:RGD Symbol;Acc:620391]	6.26	1.97	-1.67	0.02455	0.648496	yes	DOWN	N	N	N	Y	Y	6.29	1.96
ENSRNOG00000002217.L01	360914	Plac8	placenta-specific 8 [Source:RGD Symbol;Acc:1308102]	98.2	40.8	-1.27	0.02465	0.64963	yes	DOWN	N	N	N	Y	Y	98.7	40.63
ENSRNOG00000010917.L01	315824	Bmp5	bone morphogenetic protein 5 [Source:RGD Symbol;Acc:1305979]	7.74	2.7	-1.52	0.0247	0.650195	yes	DOWN	N	N	N	Y	Y	7.78	2.69
ENSRNOG00000011409	308632	Hebp2	heme binding protein 2 [Source:RGD Symbol;Acc:1311553]	36.5	14.6	-1.32	0.02475	0.650759	yes	DOWN	N	N	N	Y	Y	36.68	14.54
ENSRNOG00000020270.L01	306283	Anxa8	annexin A8 [Source:RGD Symbol;Acc:1307719]	276	114	-1.27	0.02485	0.650945	yes	DOWN	N	N	N	Y	Y	276.82	113.91
ENSRNOG00000028415	64515	Cdc20	cell division cycle 20 [Source:RGD Symbol;Acc:620477]	10.7	3.29	-1.7	0.0249	0.650945	yes	DOWN	N	N	N	Y	Y	10.78	3.28
ENSRNOG00000036866.L01	499210	Acer3	alkaline ceramidase 3 [Source:RGD Symbol;Acc:1561254]	33.6	10.6	-1.67	0.0249	0.650945	yes	DOWN	N	N	N	Y	Y	33.79	10.5
ENSRNOG00000017828.L01	25148	Egr3	early growth response 3 [Source:RGD Symbol;Acc:2545]	3.11	0.354	-3.14	0.025	0.651316	yes	DOWN	N	N	N	Y	Y	3.13	0.35
ENSRNOG00000009503.L01	295538	Depdc1	DEP domain containing 1 [Source:RGD Symbol;Acc:1306987]	3.87	0.572	-2.76	0.025	0.651316	yes	DOWN	N	N	N	Y	Y	3.89	0.57
ENSRNOG00000017469.L01	25380	Anxa1	annexin A1 [Source:RGD Symbol;Acc:2118]	1170	383	-1.62	0.0251	0.651684	yes	DOWN	N	N	N	Y	Y	1179.65	381.29
ENSRNOG00000013727.L01	301701	Ndc80	NDC80 kinetochore complex component [Source:RGD Symbol;Acc:1310154]	4.45	0.919	-2.27	0.0252	0.652792	yes	DOWN	N	N	N	Y	Y	4.47	0.91
ENSRNOG00000008885.L01	314694	Chst11	carbohydrate (chondroitin 4) sulfotransferase 11 [Source:RGD Symbol;Acc:1308400]	6.49	2.01	-1.69	0.0252	0.652792	yes	DOWN	N	N	N	Y	Y	6.52	2
ENSRNOG00000002487.L01	302492	Mbnl3	muscleblind-like splicing regulator 3 [Source:RGD Symbol;Acc:1565834]	10.3	4.46	-1.2	0.0253	0.653894	yes	DOWN	N	N	N	Y	Y	10.32	4.44
ENSRNOG00000009946.L01	300438	Ldlr	low density lipoprotein receptor [Source:RGD Symbol;Acc:2998]	29.6	13.6	-1.12	0.02535	0.654444	yes	DOWN	N	N	N	Y	Y	29.77	13.56
ENSRNOG00000011777	252918	Spag5	sperm associated antigen 5 [Source:RGD Symbol;Acc:620152]	3.5	0.912	-1.94	0.02565	0.660691	yes	DOWN	N	N	N	Y	Y	3.51	0.91
ENSRNOG00000027430.L01	301476	Ikzf2	IKAROS family zinc finger 2 [Source:RGD Symbol;Acc:1308686]	32.6	14.8	-1.14	0.026	0.667441	yes	DOWN	N	N	N	Y	Y	32.76	14.77
ENSRNOG00000023449.L01	499973	Atg9b	autophagy related 9B [Source:RGD Symbol;Acc:1560887]	2.79	0.27	-3.37	0.0265	0.677983	yes	DOWN	N	N	N	Y	Y	2.81	0.27
ENSRNOG00000027520.L01	81748	Pls3	plastin 3 [Source:RGD Symbol;Acc:621409]	107	47.3	-1.17	0.0266	0.679778	yes	DOWN	N	N	N	Y	Y	107.19	47.08
ENSRNOG00000014104.L01	25132	Myo5b	myosin Vb [Source:RGD Symbol;Acc:621347]	9.77	4.4	-1.15	0.02665	0.680292	yes	DOWN	N	N	N	Y	Y	9.82	4.38
ENSRNOG00000013481	84407	Cdh11	cadherin 11 [Source:RGD Symbol;Acc:619742]	12.4	5.26	-1.24	0.02685	0.681835	yes	DOWN	N	N	N	Y	Y	12.44	5.24
ENSRNOG00000024230.L01	315673	Tnfaip8l3	tumor necrosis factor, alpha-induced protein 8-like 3 [Source:RGD Symbol;Acc:1311533]	6.22	1.61	-1.95	0.02685	0.681835	yes	DOWN	N	N	N	Y	Y	6.25	1.6
ENSRNOG00000023079.L01	24605	Nras	neuroblastoma ras oncogene [Source:RGD Symbol;Acc:3205]	27.5	12.2	-1.18	0.0269	0.681835	yes	DOWN	N	N	N	Y	Y	27.62	12.11
ENSRNOG00000037931.L01	50692	Plaur	plasminogen activator, urokinase receptor [Source:RGD Symbol;Acc:620597]	19.1	5.24	-1.86	0.02695	0.681835	yes	DOWN	N	N	N	Y	Y	19.14	5.21
ENSRNOG00000001992.L01	685232	Atp6v1a	ATPase, H+ transporting, lysosomal V1 subunit A [Source:RGD Symbol;Acc:1596464]	39.2	18.1	-1.12	0.02695	0.681835	yes	DOWN	N	N	N	Y	Y	39.37	18
ENSRNOG00000002031.L01	289482	Naa11	N(alpha)-acetyltransferase 11, NatA catalytic subunit [Source:RGD Symbol;Acc:1564723]	1.9	0.295	-2.69	0.0272	0.687396	yes	DOWN	N	N	N	Y	Y	1.91	0.29
ENSRNOG00000025108.L01	365881	Ankrd35	ankyrin repeat domain 35 [Source:RGD Symbol;Acc:1305527]	6.21	1.96	-1.67	0.02725	0.687896	yes	DOWN	N	N	N	Y	Y	6.23	1.95
ENSRNOG00000006777.L01	313997	Mboat2	membrane bound O-acyltransferase domain containing 2 [Source:RGD Symbol;Acc:1305798]	5.99	1.7	-1.82	0.0273	0.688395	yes	DOWN	N	N	N	Y	Y	6.02	1.69
ENSRNOG00000004959.L01	289820	Actr2	ARP2 actin-related protein 2 homolog (yeast) [Source:RGD Symbol;Acc:1310826]	100	45.2	-1.15	0.02745	0.690648	yes	DOWN	N	N	N	Y	Y	100.87	45
ENSRNOG00000006236.L01	499933	Dsn1	DSN1, MIS12 kinetochore complex component [Source:RGD Symbol;Acc:1565179]	4.21	0.928	-2.18	0.02765	0.694912	yes	DOWN	N	N	N	Y	Y	4.23	0.92
ENSRNOG00000005599.L01	297572	Cpamd8	C3 and PZP-like, alpha-2-macroglobulin domain containing 8 [Source:EntrezGene;Acc:297572]	3.42	0.0812	-5.4	0.02775	0.695889	yes	DOWN	N	N	N	Y	Y	3.43	0.08
ENSRNOG00000008040	360559	Fam64a	family with sequence similarity 64, member A [Source:RGD Symbol;Acc:1308747]	5.24	0.858	-2.61	0.02785	0.697629	yes	DOWN	N	N	N	Y	Y	5.27	0.85
ENSRNOG00000009144	313325	Lad1	ladinin 1 [Source:RGD Symbol;Acc:1310652]	84.8	39.5	-1.1	0.0281	0.700807	yes	DOWN	N	N	N	Y	Y	85.16	39.27
ENSRNOG00000030021.L01	287910	Ccl6	chemokine (C-C motif) ligand 6 [Source:RGD Symbol;Acc:1303200]	20.8	7.29	-1.51	0.0286	0.710166	yes	DOWN	N	N	N	Y	Y	20.92	7.26
ENSRNOG00000008855	394266	Gjb2	gap junction protein, beta 2 [Source:RGD Symbol;Acc:728891]	27.7	12.2	-1.19	0.0288	0.714353	yes	DOWN	N	N	N	Y	Y	27.8	12.09
ENSRNOG00000047368.L01	301118	Acer1	alkaline ceramidase 1 [Source:RGD Symbol;Acc:1588582]	5.65	1.56	-1.86	0.02895	0.717292	yes	DOWN	N	N	N	Y	Y	5.68	1.55
ENSRNOG00000047736	64358	Kcna6	potassium voltage gated channel, shaker related subfamily, member 6 [Source:RGD Symbol;Acc:62083]	1.18	0.195	-2.59	0.0292	0.719571	yes	DOWN	N	N	N	Y	Y	1.18	0.19
ENSRNOG00000018003.L01	116677	F2rl1	coagulation factor II (thrombin) receptor-like 1 [Source:RGD Symbol;Acc:620866]	17.7	7.51	-1.24	0.02925	0.720024	yes	DOWN	N	N	N	Y	Y	17.79	7.48
ENSRNOG00000003476.L01	25553	Slc6a4	solute carrier family 6 (neurotransmitter transporter), member 4 [Source:RGD Symbol;Acc:3714]	18.8	8.16	-1.2	0.02935	0.72015	yes	DOWN	N	N	N	Y	Y	18.84	8.12
ENSRNOG00000049052.L01	171498	Sgk3	serum/glucocorticoid regulated kinase family, member 3 [Source:RGD Symbol;Acc:620242]	15.5	6.63	-1.23	0.0295	0.722721	yes	DOWN	N	N	N	Y	Y	15.59	6.6
ENSRNOG00000023687.L01	114560	Rap2a	RAS related protein 2a [Source:RGD Symbol;Acc:620590]	14.2	4.16	-1.77	0.02955	0.722721	yes	DOWN	N	N	N	Y	Y	14.28	4.14
ENSRNOG00000016606	363276	RGD1311447	LOC363276 [Source:RGD Symbol;Acc:1311447]	17.9	3.98	-2.17	0.0298	0.727273	yes	DOWN	N	N	N	Y	Y	18.01	3.96
ENSRNOG00000014479.L01	310760	Cttnbp2nl	CTTNBP2 N-terminal like [Source:RGD Symbol;Acc:1310822]	21.7	10	-1.11	0.0301	0.733024	yes	DOWN	N	N	N	Y	Y	21.76	9.96
ENSRNOG00000014426.L01	24914	Lox	lysyl oxidase [Source:RGD Symbol;Acc:3015]	7.68	3.03	-1.34	0.0303	0.737106	yes	DOWN	N	N	N	Y	Y	7.72	3.02
ENSRNOG00000014710.L01	192211	Prom2	prominin 2 [Source:RGD Symbol;Acc:621435]	45	21.5	-1.07	0.0307	0.745244	yes	DOWN	N	N	N	Y	Y	45.23	21.35
ENSRNOG00000015248.L01	301482	Abca12	ATP-binding cassette, subfamily A (ABC1), member 12 [Source:RGD Symbol;Acc:1304586]	1.12	0.071	-3.98	0.031	0.747403	yes	DOWN	N	N	N	Y	Y	1.12	0.07
ENSRNOG00000008412.L01	312790	Gprc5a	G protein-coupled receptor, class C, group 5, member A [Source:RGD Symbol;Acc:1310804]	164	77.5	-1.08	0.031	0.747403	yes	DOWN	N	N	N	Y	Y	164.66	77.15
ENSRNOG00000009613.L01	501026	Sh3bgrl2	SH3 domain binding glutamate-rich protein like 2 [Source:RGD Symbol;Acc:1591931]	45.8	21.8	-1.07	0.03105	0.747403	yes	DOWN	N	N	N	Y	Y	46.02	21.72
ENSRNOG00000005639.L01	24208	Ar	androgen receptor [Source:RGD Symbol;Acc:2147]	5.43	2.39	-1.18	0.03115	0.747403	yes	DOWN	N	N	N	Y	Y	5.45	2.38
ENSRNOG00000019412.L01	310625	Rhbg	Rh family, B glycoprotein [Source:RGD Symbol;Acc:727813]	18.1	5.84	-1.63	0.03115	0.747403	yes	DOWN	N	N	N	Y	Y	18.16	5.82
ENSRNOG00000012835.L01	315330	Espl1	extra spindle pole bodies homolog 1 (S. cerevisiae) [Source:RGD Symbol;Acc:1306266]	2.63	0.822	-1.68	0.03135	0.749831	yes	DOWN	N	N	N	Y	Y	2.65	0.82
ENSRNOG00000046772.L01	683506	Fam83c	family with sequence similarity 83, member C [Source:RGD Symbol;Acc:1585687]	5.3	1.84	-1.53	0.03135	0.749831	yes	DOWN	N	N	N	Y	Y	5.33	1.83
ENSRNOG00000016334.L01	83515	Ptbp3	polypyrimidine tract binding protein 3 [Source:RGD Symbol;Acc:621671]	39.5	18.5	-1.09	0.0316	0.754226	yes	DOWN	N	N	N	Y	Y	39.68	18.41
ENSRNOG00000016983.L01	29557	Myh7	myosin, heavy chain 7, cardiac muscle, beta [Source:RGD Symbol;Acc:62030]	1.47	0.0493	-4.9	0.0317	0.75503	yes	DOWN	N	N	N	Y	Y	1.48	0.05
ENSRNOG00000027606.L01	303019	Neurl1b	neuralized E3 ubiquitin protein ligase 1B [Source:RGD Symbol;Acc:1564984]	3.46	1.23	-1.5	0.0317	0.75503	yes	DOWN	N	N	N	Y	Y	3.48	1.22
ENSRNOG00000016798.L01	690388	Pla2g2f	phospholipase A2, group IIF [Source:RGD Symbol;Acc:1597305]	4.07	0.365	-3.48	0.0318	0.756621	yes	DOWN	N	N	N	Y	Y	4.09	0.36
ENSRNOG00000011994	292949	Perp	PERP, TP53 apoptosis effector [Source:RGD Symbol;Acc:1310294]	505	199	-1.35	0.03195	0.757814	yes	DOWN	N	N	N	Y	Y	507.91	197.77
ENSRNOG00000001804.L01	81678	Itpr2	inositol 1,4,5-trisphosphate receptor, type 2 [Source:EntrezGene;Acc:81678]	12.7	6.03	-1.08	0.03225	0.763339	yes	DOWN	N	N	N	Y	Y	12.79	6
ENSRNOG00000009258.L01	114483	Cdk6	cyclin-dependent kinase 6 [Source:RGD Symbol;Acc:621121]	10.3	4.92	-1.06	0.03245	0.765685	yes	DOWN	N	N	N	Y	Y	10.34	4.9
ENSRNOG00000033348.L01	266807	Duox1	dual oxidase 1 [Source:RGD Symbol;Acc:628760]	56.4	26.5	-1.09	0.0325	0.766071	yes	DOWN	N	N	N	Y	Y	56.72	26.38
ENSRNOG00000010430.L01	680858	Tmem40	transmembrane protein 40 [Source:RGD Symbol;Acc:1587025]	11.4	3.46	-1.71	0.03285	0.773521	yes	DOWN	N	N	N	Y	Y	11.41	3.44
ENSRNOG00000009005.L01	24546	Slco2a1	solute carrier organic anion transporter family, member 2a1 [Source:RGD Symbol;Acc:3051]	18.8	8.11	-1.21	0.0329	0.773898	yes	DOWN	N	N	N	Y	Y	18.86	8.07
ENSRNOG00000018742.L01	292849	Klk11	kallikrein related-peptidase 11 [Source:RGD Symbol;Acc:1308690]	15.3	0.358	-5.42	0.0332	0.777683	yes	DOWN	N	N	N	Y	Y	15.37	0.36
ENSRNOG00000021713.L01	303575	Kif18b	kinesin family member 18B [Source:RGD Symbol;Acc:1310360]	4.36	1.09	-2	0.0332	0.777683	yes	DOWN	N	N	N	Y	Y	4.38	1.08
ENSRNOG00000000479	294286	Kifc1	kinesin family member C1 [Source:RGD Symbol;Acc:1359118]	9.7	3.03	-1.68	0.0333	0.777683	yes	DOWN	N	N	N	Y	Y	9.74	3.02
ENSRNOG00000023411.L01	308556	Vsig10l	V-set and immunoglobulin domain containing 10 like [Source:RGD Symbol;Acc:1564982]	10.7	4.63	-1.21	0.0335	0.780752	yes	DOWN	N	N	N	Y	Y	10.79	4.61
ENSRNOG00000023576.L01	363225	RGD1305645	similar to RIKEN cDNA 1500015O10 [Source:RGD Symbol;Acc:1305645]	39.6	9.48	-2.06	0.0336	0.781414	yes	DOWN	N	N	N	Y	Y	39.79	9.44
ENSRNOG00000018113	307056	Anlnl1	anillin, actin binding protein-like 1 [Source:RGD Symbol;Acc:1566097]	4.28	0.995	-2.11	0.03365	0.781414	yes	DOWN	N	N	N	Y	Y	4.3	0.99
ENSRNOG00000020129.L01	116777	Cdh3	cadherin 3 [Source:RGD Symbol;Acc:621089]	63.8	25.8	-1.31	0.0337	0.781414	yes	DOWN	N	N	N	Y	Y	64.15	25.71
ENSRNOG00000026252.L01	314818	E2f7	E2F transcription factor 7 [Source:RGD Symbol;Acc:1310258]	1.55	0.298	-2.37	0.0337	0.781414	yes	DOWN	N	N	N	Y	Y	1.55	0.3
ENSRNOG00000000522.L01	309650	Cpne5	copine V [Source:RGD Symbol;Acc:1308021]	2.46	0.496	-2.31	0.0339	0.783658	yes	DOWN	N	N	N	Y	Y	2.47	0.49
ENSRNOG00000021670.L01	310418	Frem2	Fras1 related extracellular matrix protein 2 [Source:RGD Symbol;Acc:1566012]	1.04	0.295	-1.82	0.0339	0.783658	yes	DOWN	N	N	N	Y	Y	1.05	0.29
ENSRNOG00000015308	290326	Pbk	PDZ binding kinase [Source:RGD Symbol;Acc:1309565]	4	0.691	-2.53	0.0341	0.786684	yes	DOWN	N	N	N	Y	Y	4.02	0.69
ENSRNOG00000016023.L01	309429	Kank1	KN motif and ankyrin repeat domains 1 [Source:RGD Symbol;Acc:1307714]	93.5	38.9	-1.26	0.03445	0.793151	yes	DOWN	N	N	N	Y	Y	93.91	38.74
ENSRNOG00000026650	367074	Tmprss4	transmembrane protease, serine 4 [Source:RGD Symbol;Acc:1305033]	6.43	1.89	-1.77	0.03465	0.796146	yes	DOWN	N	N	N	Y	Y	6.46	1.88
ENSRNOG00000010274.L01	295107	Smc4	structural maintenance of chromosomes 4 [Source:RGD Symbol;Acc:1306680]	15.9	6.96	-1.19	0.03475	0.797639	yes	DOWN	N	N	N	Y	Y	15.97	6.93
ENSRNOG00000006396.L01	25216	Sdc1	syndecan 1 [Source:RGD Symbol;Acc:3648]	289	117	-1.31	0.03485	0.799128	yes	DOWN	N	N	N	Y	Y	290.59	116.36
ENSRNOG00000002711.L01	304951	Nuf2	NUF2, NDC80 kinetochore complex component [Source:RGD Symbol;Acc:1307952]	6.25	1.43	-2.13	0.03495	0.800615	yes	DOWN	N	N	N	Y	Y	6.28	1.42
ENSRNOG00000007805.L01	296344	Mybl2	myeloblastosis oncogene-like 2 [Source:RGD Symbol;Acc:1308474]	3.73	0.946	-1.98	0.035	0.800955	yes	DOWN	N	N	N	Y	Y	3.74	0.94
ENSRNOG00000003219.L01	303214	Trim16	tripartite motif-containing 16 [Source:RGD Symbol;Acc:1309749]	32.6	15.9	-1.04	0.0352	0.801841	yes	DOWN	N	N	N	Y	Y	32.77	15.83
ENSRNOG00000009222	366492	Epha2	Eph receptor A2 [Source:RGD Symbol;Acc:1307204]	45.6	21.8	-1.06	0.03525	0.801841	yes	DOWN	N	N	N	Y	Y	45.77	21.72
ENSRNOG00000022136.L01	685680	LOC683549	similar to TPA-induced transmembrane protein [Source:RGD Symbol;Acc:1585645]	4.96	1.21	-2.04	0.03525	0.801841	yes	DOWN	N	N	N	Y	Y	4.98	1.2
ENSRNOG00000015514.L01	29592	Bcat1	branched chain amino acid transaminase 1, cytosolic [Source:RGD Symbol;Acc:2195]	3.31	0.467	-2.82	0.03555	0.807052	yes	DOWN	N	N	N	Y	Y	3.32	0.47
ENSRNOG00000032884.L01	29701	Scn11a	sodium channel, voltage-gated, type XI, alpha subunit [Source:RGD Symbol;Acc:3630]	1.13	0.0525	-4.42	0.0357	0.808041	yes	DOWN	N	N	N	Y	Y	1.13	0.05
ENSRNOG00000020470.L01	310791	Slc25a24	solute carrier family 25 (mitochondrial carrier, phosphate carrier), member 24 [Source:RGD Symbol;Acc:1311982]	19.2	8.85	-1.12	0.0359	0.811761	yes	DOWN	N	N	N	Y	Y	19.32	8.81
ENSRNOG00000010534.L01	294988	Ankrd50	ankyrin repeat domain 50 [Source:RGD Symbol;Acc:1311665]	11.3	5.23	-1.11	0.03605	0.813537	yes	DOWN	N	N	N	Y	Y	11.35	5.2
ENSRNOG00000000572.L01	84468	Chst3	carbohydrate (chondroitin 6) sulfotransferase 3 [Source:RGD Symbol;Acc:620355]	4.83	1.69	-1.52	0.0363	0.817558	yes	DOWN	N	N	N	Y	Y	4.86	1.68
ENSRNOG00000001656.L01	170847	Kcnj15	potassium inwardly-rectifying channel, subfamily J, member 15 [Source:RGD Symbol;Acc:621662]	25.6	9.95	-1.36	0.0364	0.819	yes	DOWN	N	N	N	Y	Y	25.75	9.91
ENSRNOG00000020382.L01	100912863	Ltb4r2	leukotriene B4 receptor 2 [Source:RGD Symbol;Acc:621029]	8.15	2.43	-1.74	0.0365	0.81963	yes	DOWN	N	N	N	Y	Y	8.19	2.42
ENSRNOG00000024711.L01	360652	Sdk2	sidekick cell adhesion molecule 2 [Source:RGD Symbol;Acc:1310397]	1.17	0.297	-1.98	0.0366	0.820258	yes	DOWN	N	N	N	Y	Y	1.18	0.3
ENSRNOG00000036745.L01	303634	Gna13	guanine nucleotide binding protein (G protein), alpha 13 [Source:RGD Symbol;Acc:1310221]	23.8	11	-1.11	0.0367	0.820883	yes	DOWN	N	N	N	Y	Y	23.89	10.94
ENSRNOG00000015794	311598	Fam83d	family with sequence similarity 83, member D [Source:RGD Symbol;Acc:1565583]	3.37	0.841	-2	0.0367	0.820883	yes	DOWN	N	N	N	Y	Y	3.38	0.84
ENSRNOG00000004346.L01	56761	Notch3	notch 3 [Source:RGD Symbol;Acc:620761]	23	11.4	-1.01	0.03675	0.821195	yes	DOWN	N	N	N	Y	Y	23.15	11.37
ENSRNOG00000010555.L01	290356	LOC102551958	phytanoyl-CoA hydroxylase-interacting protein-like [Source:RGD Symbol;Acc:7719585]	39.5	19	-1.06	0.0369	0.823738	yes	DOWN	N	N	N	Y	Y	39.69	18.9
ENSRNOG00000007234	25427	Cyp51	cytochrome P450, family 51 [Source:RGD Symbol;Acc:2481]	28.9	13.7	-1.08	0.03715	0.827696	yes	DOWN	N	N	N	Y	Y	29.07	13.62
ENSRNOG00000006170.L01	313125	Bach2	BTB and CNC homology 1, basic leucine zipper transcription factor 2 [Source:RGD Symbol;Acc:1562865]	3.68	1.46	-1.33	0.03725	0.828403	yes	DOWN	N	N	N	Y	Y	3.7	1.45
ENSRNOG00000027894.L01	310621	Iqgap3	IQ motif containing GTPase activating protein 3 [Source:RGD Symbol;Acc:1305951]	3.59	1.26	-1.51	0.0373	0.828403	yes	DOWN	N	N	N	Y	Y	3.61	1.26
ENSRNOG00000014434.L01	308215	Chd1	chromodomain helicase DNA binding protein 1 [Source:RGD Symbol;Acc:1306794]	13.7	6.53	-1.07	0.0374	0.828403	yes	DOWN	N	N	N	Y	Y	13.79	6.5
ENSRNOG00000014265.L01	290300	Tnfrsf19	tumor necrosis factor receptor superfamily, member 19 [Source:RGD Symbol;Acc:1564996]	16.4	7.32	-1.16	0.0375	0.829005	yes	DOWN	N	N	N	Y	Y	16.43	7.29
ENSRNOG00000018126.L01	313210	Abca1	ATP-binding cassette, subfamily A (ABC1), member 1 [Source:RGD Symbol;Acc:631344]	5.91	2.61	-1.18	0.0377	0.832618	yes	DOWN	N	N	N	Y	Y	5.94	2.6
ENSRNOG00000019465	25686	Gnai3	guanine nucleotide binding protein (G protein), alpha inhibiting activity polypeptide 3 [Source:RGD Symbol;Acc:2714]	62.3	30.3	-1.04	0.03785	0.833505	yes	DOWN	N	N	N	Y	Y	62.59	30.15
ENSRNOG00000013213	316539	Epha4	Eph receptor A4 [Source:RGD Symbol;Acc:1560587]	6.1	2.66	-1.2	0.03785	0.833505	yes	DOWN	N	N	N	Y	Y	6.13	2.65
ENSRNOG00000026919.L01	312226	RGD1565367	similar to Solute carrier family 23, member 2 (Sodium-dependent vitamin C transporter 2) [Source:RGD Symbol;Acc:1565367]	13.4	5.4	-1.32	0.038	0.834681	yes	DOWN	N	N	N	Y	Y	13.49	5.37
ENSRNOG00000007271.L01	500690	Map3k9	mitogen-activated protein kinase kinase kinase 9 [Source:RGD Symbol;Acc:1562149]	8.24	3.61	-1.19	0.03805	0.834681	yes	DOWN	N	N	N	Y	Y	8.28	3.6
ENSRNOG00000050215	682408	LOC682408	similar to corneodesmosin [Source:RGD Symbol;Acc:1583483]	25.3	9.63	-1.39	0.03825	0.837454	yes	DOWN	N	N	N	Y	Y	25.46	9.59
ENSRNOG00000005115	304648	Asf1b	anti-silencing function 1B histone chaperone [Source:RGD Symbol;Acc:1304918]	4.35	0.801	-2.44	0.0383	0.837744	yes	DOWN	N	N	N	Y	Y	4.37	0.8
ENSRNOG00000014960.L01	64557	Bard1	BRCA1 associated RING domain 1 [Source:RGD Symbol;Acc:621072]	1.85	0.454	-2.03	0.03845	0.840217	yes	DOWN	N	N	N	Y	Y	1.86	0.45
ENSRNOG00000042461.L01	691813	Pla2g4c	phospholipase A2, group IVC [Source:RGD Symbol;Acc:1594655]	95.7	44	-1.12	0.039	0.849789	yes	DOWN	N	N	N	Y	Y	96.19	43.76
ENSRNOG00000020923.L01	365864	Tuft1	tuftelin 1 [Source:RGD Symbol;Acc:1310373]	42.9	20.4	-1.07	0.0394	0.856865	yes	DOWN	N	N	N	Y	Y	43.09	20.27
ENSRNOG00000023953	288067	Csta	cystatin A (stefin A) [Source:RGD Symbol;Acc:1309603]	26.1	2.4	-3.44	0.03955	0.858488	yes	DOWN	N	N	N	Y	Y	26.19	2.39
ENSRNOG00000016377.L01	294074	Cep55	centrosomal protein 55 [Source:RGD Symbol;Acc:1305340]	3.9	0.974	-2	0.03985	0.859266	yes	DOWN	N	N	N	Y	Y	3.92	0.97
ENSRNOG00000025604.L01	314993	Atad2	ATPase family, AAA domain containing 2 [Source:RGD Symbol;Acc:1304849]	8.29	3.72	-1.15	0.03995	0.860607	yes	DOWN	N	N	N	Y	Y	8.33	3.71
ENSRNOG00000016953.L01	307838	Chst4	carbohydrate (N-acetylglucosamine 6-O) sulfotransferase 4 [Source:RGD Symbol;Acc:1310798]	6.4	2.23	-1.52	0.04125	0.881109	yes	DOWN	N	N	N	Y	Y	6.43	2.22
ENSRNOG00000025372.L01	363073	Glce	glucuronic acid epimerase [Source:RGD Symbol;Acc:1565253]	18.9	9.09	-1.06	0.04125	0.881109	yes	DOWN	N	N	N	Y	Y	19.02	9.05
ENSRNOG00000006649.L01	24831	Thrb	thyroid hormone receptor beta [Source:RGD Symbol;Acc:3858]	8.59	4.01	-1.1	0.04135	0.881591	yes	DOWN	N	N	N	Y	Y	8.63	3.99
ENSRNOG00000001607	79252	Adamts1	ADAM metallopeptidase with thrombospondin type 1 motif, 1 [Source:RGD Symbol;Acc:621241]	29.8	14.9	-1	0.04185	0.891417	yes	DOWN	N	N	N	Y	N	29.98	14.85
ENSRNOG00000027380.L01	303924	Upk1b	uroplakin 1B [Source:RGD Symbol;Acc:1307806]	247	115	-1.1	0.04195	0.891507	yes	DOWN	N	N	N	Y	Y	248.38	114.4
ENSRNOG00000008305.L01	114100	Sc5d	sterol-C5-desaturase [Source:RGD Symbol;Acc:620775]	27.6	12.7	-1.12	0.04205	0.891507	yes	DOWN	N	N	N	Y	Y	27.77	12.64
ENSRNOG00000006996	313108	Mms22l	MMS22-like, DNA repair protein [Source:RGD Symbol;Acc:1304693]	1.43	0.27	-2.41	0.0423	0.89514	yes	DOWN	N	N	N	Y	Y	1.44	0.27
ENSRNOG00000025115.L01	315663	Exph5	exophilin 5 [Source:RGD Symbol;Acc:1560308]	11.6	5.57	-1.05	0.0423	0.89514	yes	DOWN	N	N	N	Y	Y	11.63	5.55
ENSRNOG00000012364.L01	312563	Prickle2	prickle homolog 2 (Drosophila) [Source:RGD Symbol;Acc:1306723]	4.33	1.82	-1.25	0.04285	0.905097	yes	DOWN	N	N	N	Y	Y	4.36	1.82
ENSRNOG00000007078.L01	65154	Wisp1	WNT1 inducible signaling pathway protein 1 [Source:RGD Symbol;Acc:69431]	1.36	0.321	-2.09	0.043	0.906583	yes	DOWN	N	N	N	Y	Y	1.37	0.32
ENSRNOG00000015329	85245	Kpna2	karyopherin alpha 2 [Source:RGD Symbol;Acc:621419]	27.8	12.5	-1.15	0.043	0.906583	yes	DOWN	N	N	N	Y	Y	27.92	12.44
ENSRNOG00000002282.L01	305246	Ppef2	protein phosphatase, EF hand calcium-binding domain 2 [Source:RGD Symbol;Acc:1307093]	2.7	0.586	-2.2	0.04305	0.906798	yes	DOWN	N	N	N	Y	Y	2.71	0.58
ENSRNOG00000032778.L01	296137	Bub1	BUB1 mitotic checkpoint serine/threonine kinase [Source:RGD Symbol;Acc:1311707]	5.67	1.91	-1.57	0.04325	0.908489	yes	DOWN	N	N	N	Y	Y	5.7	1.9
ENSRNOG00000002105.L01	360908	Cdc7	cell division cycle 7 [Source:RGD Symbol;Acc:1308351]	3.14	0.722	-2.12	0.0435	0.910381	yes	DOWN	N	N	N	Y	Y	3.15	0.72
ENSRNOG00000016588	369016	Myadm	myeloid-associated differentiation marker [Source:RGD Symbol;Acc:727835]	137	65.5	-1.07	0.0435	0.910381	yes	DOWN	N	N	N	Y	Y	138.15	65.25
ENSRNOG00000007909	29187	Cd69	Cd69 molecule [Source:RGD Symbol;Acc:61318]	11.9	3.61	-1.72	0.04375	0.913302	yes	DOWN	N	N	N	Y	Y	11.98	3.6
ENSRNOG00000011024.L01	305923	Zdhhc20	zinc finger, DHHC-type containing 20 [Source:RGD Symbol;Acc:1305755]	21.4	10.5	-1.03	0.0442	0.919118	yes	DOWN	N	N	N	Y	Y	21.49	10.45
ENSRNOG00000005465.L01	29747	Kcnmb1	potassium large conductance calcium-activated channel, subfamily M, beta member 1 [Source:RGD Symbol;Acc:2961]	1.42	0.144	-3.3	0.0443	0.919518	yes	DOWN	N	N	N	Y	Y	1.42	0.14
ENSRNOG00000001714.L01	288026	Atp13a4	ATPase type 13A4 [Source:RGD Symbol;Acc:1306927]	18.2	8.83	-1.05	0.04435	0.919717	yes	DOWN	N	N	N	Y	Y	18.33	8.78
ENSRNOG00000012149.L01	362021	Gpsm2	G-protein signaling modulator 2 [Source:RGD Symbol;Acc:1560967]	11.9	5.23	-1.18	0.04465	0.921741	yes	DOWN	N	N	N	Y	Y	11.91	5.2
ENSRNOG00000015777.L01	307271	Mex3c	mex-3 RNA binding family member C [Source:RGD Symbol;Acc:1309023]	26.1	12.8	-1.03	0.04475	0.922329	yes	DOWN	N	N	N	Y	Y	26.26	12.7
ENSRNOG00000002624.L01	498769	Edaradd	EDAR-associated death domain [Source:RGD Symbol;Acc:1564010]	19.3	8.57	-1.17	0.0448	0.922329	yes	DOWN	N	N	N	Y	Y	19.44	8.53
ENSRNOG00000015465.L01	308064	Cep72	centrosomal protein 72 [Source:RGD Symbol;Acc:1566336]	2.67	0.672	-1.99	0.04495	0.923747	yes	DOWN	N	N	N	Y	Y	2.68	0.67
ENSRNOG00000014130	498709	LOC100362620	CDC28 protein kinase regulatory subunit 2 [Source:RGD Symbol;Acc:2324338]	26.9	7.17	-1.91	0.045	0.92394	yes	DOWN	N	N	N	Y	Y	27.05	7.14
ENSRNOG00000032436.L01	300838	Tmod3	tropomodulin 3 [Source:RGD Symbol;Acc:1311030]	96.3	45.7	-1.07	0.04545	0.9315	yes	DOWN	N	N	N	Y	Y	96.8	45.53
ENSRNOG00000030694	305844	Rnase1l2	ribonuclease, RNase A family, 1-like 2 (pancreatic) [Source:RGD Symbol;Acc:1565230]	7.59	0.473	-4	0.04595	0.940055	yes	DOWN	N	N	N	Y	Y	7.63	0.47
ENSRNOG00000037436.L01	314539	Macc1	metastasis associated in colon cancer 1 [Source:RGD Symbol;Acc:1309838]	4.73	1.74	-1.45	0.04595	0.940055	yes	DOWN	N	N	N	Y	Y	4.75	1.73
ENSRNOG00000019190.L01	294093	Ankrd22	ankyrin repeat domain 22 [Source:RGD Symbol;Acc:1307862]	23.5	9.05	-1.38	0.0468	0.951461	yes	DOWN	N	N	N	Y	Y	23.64	9.01
ENSRNOG00000014164.L01	315741	Paqr5	progestin and adipoQ receptor family member V [Source:RGD Symbol;Acc:1311259]	44.4	22.2	-0.997	0.047	0.952974	yes	DOWN	N	N	N	Y	N	44.59	22.12
ENSRNOG00000017872.L01	100365083	Aldh3b2	aldehyde dehydrogenase 3 family, member B2 [Source:RGD Symbol;Acc:1584166]	2.86	0.511	-2.49	0.0474	0.957466	yes	DOWN	N	N	N	Y	Y	2.87	0.51
ENSRNOG00000010932	297894	Matn1	matrilin 1, cartilage matrix protein [Source:RGD Symbol;Acc:1359410]	3.52	0.364	-3.27	0.0476	0.957466	yes	DOWN	N	N	N	Y	Y	3.54	0.36
ENSRNOG00000026753.L01	363054	Mpzl3	myelin protein zero-like 3 [Source:RGD Symbol;Acc:1310980]	8.81	3.81	-1.21	0.0477	0.958631	yes	DOWN	N	N	N	Y	Y	8.86	3.79
ENSRNOG00000002163	114845	Klf3	Kruppel-like factor 3 (basic) [Source:RGD Symbol;Acc:1593290]	45.1	22.9	-0.981	0.0479	0.961802	yes	DOWN	N	N	N	Y	N	45.35	22.75
ENSRNOG00000010598	84406	Hs3st1	heparan sulfate (glucosamine) 3-O-sulfotransferase 1 [Source:RGD Symbol;Acc:71084]	46.1	20.4	-1.17	0.048	0.96296	yes	DOWN	N	N	N	Y	Y	46.36	20.34
ENSRNOG00000011424	290789	Cldn23	claudin 23 [Source:RGD Symbol;Acc:1309001]	48.2	23.2	-1.06	0.0481	0.963269	yes	DOWN	N	N	N	Y	Y	48.47	23.06
ENSRNOG00000019462.L01	307481	Pcdh1	protocadherin 1 [Source:RGD Symbol;Acc:1308490]	49.3	22.6	-1.12	0.04855	0.968872	yes	DOWN	N	N	N	Y	Y	49.48	22.48
ENSRNOG00000029330.L01	302669	Car5b	carbonic anhydrase 5b, mitochondrial [Source:RGD Symbol;Acc:1549783]	48.8	17.6	-1.47	0.04885	0.972303	yes	DOWN	N	N	N	Y	Y	48.99	17.56
ENSRNOG00000012286.L01	308716	Il20ra	interleukin 20 receptor, alpha [Source:RGD Symbol;Acc:1307335]	15.2	5.53	-1.46	0.049	0.973314	yes	DOWN	N	N	N	Y	Y	15.31	5.5
ENSRNOG00000032178.L01	298850	Cenpa	centromere protein A [Source:RGD Symbol;Acc:1563607]	4.34	0.768	-2.5	0.04905	0.973314	yes	DOWN	N	N	N	Y	Y	4.37	0.76
ENSRNOG00000012081.L01	116484	Txn1	thioredoxin 1 [Source:RGD Symbol;Acc:621157]	961	475	-1.02	0.0492	0.973314	yes	DOWN	N	N	N	Y	Y	965.34	472.28
ENSRNOG00000017569.L01	307169	Mastl	microtubule associated serine/threonine kinase-like [Source:RGD Symbol;Acc:1309186]	1.91	0.397	-2.26	0.0492	0.973314	yes	DOWN	N	N	N	Y	Y	1.91	0.4
ENSRNOG00000011377.L01	305828	Socs4	suppressor of cytokine signaling 4 [Source:RGD Symbol;Acc:1306503]	6.62	2.52	-1.39	0.0495	0.976703	yes	DOWN	N	N	N	Y	Y	6.65	2.51
ENSRNOG00000016477.L01	690366	Vangl1	VANGL planar cell polarity protein 1 [Source:RGD Symbol;Acc:1597324]	29.2	14.8	-0.984	0.0495	0.976703	yes	DOWN	N	N	N	Y	N	29.38	14.71
ENSRNOG00000019100.L01	171529	Kif2c	kinesin family member 2C [Source:RGD Symbol;Acc:620239]	3.19	0.809	-1.98	0.04955	0.976843	yes	DOWN	N	N	N	Y	Y	3.2	0.81
ENSRNOG00000046834.L01	24232	C3	complement component 3 [Source:RGD Symbol;Acc:2232]	5.61	28.2	2.33	5e-05	0.0277683	yes	UP	Y	Y	Y	Y	Y	5.64	28.03
ENSRNOG00000006471.L01	25269	Pvalb	parvalbumin [Source:RGD Symbol;Acc:3457]	7.06	864	6.93	5e-05	0.0277683	yes	UP	Y	Y	Y	Y	Y	7.1	860.14
ENSRNOG00000003336.L01	83708	Mybph	myosin binding protein H [Source:RGD Symbol;Acc:620287]	10.4	51.8	2.31	5e-05	0.0277683	yes	UP	Y	Y	Y	Y	Y	10.47	51.53
ENSRNOG00000005659.L01	114592	Aurkb	aurora kinase B [Source:RGD Symbol;Acc:621625]	25.1	128	2.35	5e-05	0.0277683	yes	UP	Y	Y	Y	Y	Y	25.24	127.21
ENSRNOG00000019627.L01	292879	Mybpc2	myosin binding protein C, fast-type [Source:RGD Symbol;Acc:1311596]	10.9	101	3.21	5e-05	0.0277683	yes	UP	Y	Y	Y	Y	Y	10.99	100.67
ENSRNOG00000018978.L01	293591	Cd163l1	CD163 molecule-like 1 [Source:RGD Symbol;Acc:1307378]	3.41	24.1	2.82	5e-05	0.0277683	yes	UP	Y	Y	Y	Y	Y	3.43	24.02
ENSRNOG00000028656.L01	301521	Ccdc108	coiled-coil domain containing 108 [Source:RGD Symbol;Acc:1563002]	4.08	25.7	2.65	5e-05	0.0277683	yes	UP	Y	Y	Y	Y	Y	4.1	25.53
ENSRNOG00000007574.L01	29511	Padi2	peptidyl arginine deiminase, type II [Source:RGD Symbol;Acc:3288]	5.15	23	2.16	0.00015	0.0644434	yes	UP	N	Y	Y	Y	Y	5.18	22.86
ENSRNOG00000024508.L01	690326	LOC690326	hypothetical protein LOC690326 [Source:RGD Symbol;Acc:1597362]	0	1.89	inf	0.00015	0.0644434	yes	UP	N	Y	Y	Y	Y	0	1.88
ENSRNOG00000031249.L01	80900	Slco1a2	solute carrier organic anion transporter family, member 1A2 [Source:RGD Symbol;Acc:70985]	5.44	27.1	2.32	0.00025	0.0837132	yes	UP	N	Y	Y	Y	Y	5.47	26.98
ENSRNOG00000011754.L01	306616	Myom2	myomesin 2 [Source:RGD Symbol;Acc:631437]	5.06	21.1	2.06	0.00025	0.0837132	yes	UP	N	Y	Y	Y	Y	5.08	20.96
ENSRNOG00000019213	60666	Gpd1	glycerol-3-phosphate dehydrogenase 1 (soluble) [Source:RGD Symbol;Acc:621381]	11.1	46.1	2.06	0.0003	0.09108	yes	UP	N	Y	Y	Y	Y	11.13	45.83
ENSRNOG00000021027.L01	24309	Dbp	D site of albumin promoter (albumin D-box) binding protein [Source:RGD Symbol;Acc:2491]	19.5	98.3	2.34	0.00055	0.109296	yes	UP	N	N	Y	Y	Y	19.56	97.78
ENSRNOG00000047551	100911615	Pnpla2	patatin-like phospholipase domain containing 2 [Source:RGD Symbol;Acc:1309044]	0	0.811	inf	0.00055	0.109296	yes	UP	N	N	Y	Y	Y	0	0.81
ENSRNOG00000023216.L01	500528	Ccdc17	coiled-coil domain containing 17 [Source:RGD Symbol;Acc:1598211]	35.5	120	1.75	0.00065	0.114733	yes	UP	N	N	Y	Y	Y	35.64	119.07
ENSRNOG00000049898	360543	Myh4	myosin, heavy chain 4, skeletal muscle [Source:RGD Symbol;Acc:3139]	22.1	678	4.94	0.00095	0.136047	yes	UP	N	N	Y	Y	Y	22.14	675.12
ENSRNOG00000006930.L01	686019	Casq1	calsequestrin 1 (fast-twitch, skeletal muscle) [Source:RGD Symbol;Acc:1586677]	88.3	316	1.84	0.001	0.139693	yes	UP	N	N	Y	Y	Y	88.75	314.25
ENSRNOG00000019745.L01	171009	Actn3	actinin alpha 3 [Source:RGD Symbol;Acc:621792]	0.708	157	7.79	0.00145	0.185486	yes	UP	N	N	Y	Y	Y	0.71	156.33
ENSRNOG00000008235.L01	117558	Mylk2	myosin light chain kinase 2 [Source:RGD Symbol;Acc:620934]	5.23	17.7	1.76	0.0022	0.263653	yes	UP	N	N	Y	Y	Y	5.26	17.61
ENSRNOG00000048797.L01	25350	Sftpd	surfactant protein D [Source:RGD Symbol;Acc:3667]	27.6	89	1.69	0.0025	0.291776	yes	UP	N	N	Y	Y	Y	27.69	88.55
ENSRNOG00000001036.L01	288478	Rsph10b	radial spoke head 10 homolog B (Chlamydomonas) [Source:RGD Symbol;Acc:1311893]	1.97	10.8	2.46	0.00255	0.291776	yes	UP	N	N	Y	Y	Y	1.98	10.8
ENSRNOG00000025110.L01	293449	Vwa3a	von Willebrand factor A domain containing 3A [Source:RGD Symbol;Acc:1311670]	2.57	13.6	2.41	0.00265	0.300202	yes	UP	N	N	Y	Y	Y	2.59	13.57
ENSRNOG00000008210.L01	315962	Ky	kyphoscoliosis peptidase [Source:RGD Symbol;Acc:1305407]	6.76	20.5	1.6	0.00265	0.300201	yes	UP	N	N	Y	Y	Y	6.79	20.37
ENSRNOG00000013034	361003	Dupd1	dual specificity phosphatase and pro isomerase domain containing 1 [Source:RGD Symbol;Acc:1310229]	2.36	24.4	3.37	0.0027	0.304351	yes	UP	N	N	Y	Y	Y	2.37	24.3
ENSRNOG00000020539.L01	24571	Muc1	mucin 1, cell surface associated [Source:RGD Symbol;Acc:3122]	17.7	52.9	1.58	0.00345	0.353858	yes	UP	N	N	Y	Y	Y	17.84	52.69
ENSRNOG00000013415.L01	301333	Ptpn18	protein tyrosine phosphatase, non-receptor type 18 [Source:RGD Symbol;Acc:1311586]	32.3	99.5	1.63	0.00355	0.35926	yes	UP	N	N	Y	Y	Y	32.41	99.03
ENSRNOG00000008001	81755	Rab3b	RAB3B, member RAS oncogene family [Source:RGD Symbol;Acc:620922]	2.12	18.1	3.1	0.00365	0.366126	yes	UP	N	N	Y	Y	Y	2.13	18.04
ENSRNOG00000039086.L01	300663	Ccdc153	coiled-coil domain containing 153 [Source:RGD Symbol;Acc:1305351]	5.16	26.3	2.35	0.00365	0.366126	yes	UP	N	N	Y	Y	Y	5.18	26.17
ENSRNOG00000028900.L01	24299	Cyp2a3	cytochrome P450, family 2, subfamily a, polypeptide 3 [Source:RGD Symbol;Acc:2465]	50.9	151	1.57	0.0037	0.369513	yes	UP	N	N	Y	Y	Y	51.19	150.35
ENSRNOG00000011518	501718	Dusp26	dual specificity phosphatase 26 (putative) [Source:RGD Symbol;Acc:1310090]	5.23	24.2	2.21	0.00385	0.38115	yes	UP	N	N	Y	Y	Y	5.26	24.04
ENSRNOG00000016026	363551	RGD1562673	similar to Prostatic spermine-binding protein precursor (SBP) [Source:RGD Symbol;Acc:1562673]	4.46	37.3	3.07	0.00405	0.395788	yes	UP	N	N	Y	Y	Y	4.48	37.16
ENSRNOG00000043451	25353	Spp1	secreted phosphoprotein 1 [Source:RGD Symbol;Acc:3752]	5.45	24.4	2.16	0.0042	0.405229	yes	UP	N	N	Y	Y	Y	5.47	24.24
ENSRNOG00000048169.L01	500377	Tuba8	tubulin, alpha 8 [Source:RGD Symbol;Acc:1566041]	17	50.3	1.57	0.00535	0.422771	yes	UP	N	N	Y	Y	Y	17.09	50.1
ENSRNOG00000020484.L01	365391	Trpm5	transient receptor potential cation channel, subfamily M, member 5 [Source:RGD Symbol;Acc:1310620]	4.55	13.7	1.59	0.00555	0.422771	yes	UP	N	N	Y	Y	Y	4.57	13.68
ENSRNOG00000017716.L01	25708	Ucp3	uncoupling protein 3 (mitochondrial, proton carrier) [Source:RGD Symbol;Acc:3933]	11.1	31.2	1.5	0.0058	0.422771	yes	UP	N	N	Y	Y	Y	11.1	31.02
ENSRNOG00000009565	89813	Pdk4	pyruvate dehydrogenase kinase, isozyme 4 [Source:RGD Symbol;Acc:69061]	44.7	131	1.55	0.0061	0.422771	yes	UP	N	N	Y	Y	Y	44.96	130.81
ENSRNOG00000036827	58977	Ppp1r1a	protein phosphatase 1, regulatory (inhibitor) subunit 1A [Source:RGD Symbol;Acc:62018]	4.65	18	1.96	0.00615	0.422771	yes	UP	N	N	Y	Y	Y	4.67	17.95
ENSRNOG00000019120.L01	24450	Hmgcs2	3-hydroxy-3-methylglutaryl-CoA synthase 2 (mitochondrial) [Source:RGD Symbol;Acc:2804]	4.01	16.8	2.07	0.0062	0.422771	yes	UP	N	N	Y	Y	Y	4.03	16.72
ENSRNOG00000002753.L01	360638	Adam11	ADAM metallopeptidase domain 11 [Source:RGD Symbol;Acc:1307515]	16.1	48.3	1.59	0.0064	0.422771	yes	UP	N	N	Y	Y	Y	16.15	48.09
ENSRNOG00000013605.L01	691161	Sh2d6	SH2 domain containing 6 [Source:RGD Symbol;Acc:1587427]	18.4	50.5	1.45	0.0065	0.422771	yes	UP	N	N	Y	Y	Y	18.54	50.28
ENSRNOG00000010805.L01	79451	Fabp4	fatty acid binding protein 4, adipocyte [Source:RGD Symbol;Acc:69309]	147	377	1.36	0.00725	0.422771	yes	UP	N	N	Y	Y	Y	147.75	374.87
ENSRNOG00000036585.L01	365476	Cfap43	cilia and flagella associated protein 43 [Source:RGD Symbol;Acc:1560545]	2.68	12.1	2.17	0.00725	0.422771	yes	UP	N	N	Y	Y	Y	2.7	12.05
ENSRNOG00000009533.L01	295528	Erich3	glutamate-rich 3 [Source:RGD Symbol;Acc:1593279]	0.71	3.07	2.11	0.00755	0.422771	yes	UP	N	N	Y	Y	Y	0.71	3.06
ENSRNOG00000021795.L01	300074	Fam227a	family with sequence similarity 227, member A [Source:RGD Symbol;Acc:1305939]	2.96	9.82	1.73	0.00755	0.422771	yes	UP	N	N	Y	Y	Y	2.98	9.77
ENSRNOG00000028064.L01	500577	Fhad1	forkhead-associated (FHA) phosphopeptide binding domain 1 [Source:RGD Symbol;Acc:1563444]	1.19	5.33	2.16	0.00755	0.422771	yes	UP	N	N	Y	Y	Y	1.2	5.3
ENSRNOG00000015581.L01	117250	Dnah6	dynein, axonemal, heavy chain 6 [Source:RGD Symbol;Acc:621797]	0.563	3.23	2.52	0.0076	0.422771	yes	UP	N	N	Y	Y	Y	0.57	3.21
ENSRNOG00000017178	292017	Hydin	Hydin, axonemal central pair apparatus protein [Source:RGD Symbol;Acc:1562254]	0.574	2.54	2.14	0.0076	0.422771	yes	UP	N	N	Y	Y	Y	0.58	2.53
ENSRNOG00000022523.L01	361810	Fkbp5	FK506 binding protein 5 [Source:RGD Symbol;Acc:1309155]	2.61	9.69	1.89	0.0077	0.422771	yes	UP	N	N	Y	Y	Y	2.62	9.65
ENSRNOG00000048769.L01	685440	Nek5	NIMA-related kinase 5 [Source:RGD Symbol;Acc:1593817]	1.89	8.66	2.2	0.0083	0.422771	yes	UP	N	N	Y	Y	Y	1.89	8.62
ENSRNOG00000005947	114248	Pde6h	phosphodiesterase 6H, cGMP-specific, cone, gamma [Source:RGD Symbol;Acc:70933]	0	2.89	inf	0.0086	0.422771	yes	UP	N	N	Y	Y	Y	0	2.87
ENSRNOG00000007540	312897	Msc	musculin [Source:RGD Symbol;Acc:1305496]	0	1.91	inf	0.0086	0.422771	yes	UP	N	N	Y	Y	Y	0	1.9
ENSRNOG00000024905.L01	362712	Drc1	dynein regulatory complex subunit 1 [Source:RGD Symbol;Acc:1359318]	1.96	8.92	2.19	0.00865	0.422771	yes	UP	N	N	Y	Y	Y	1.97	8.87
ENSRNOG00000034089.L01	301065	Ttc21a	tetratricopeptide repeat domain 21A [Source:RGD Symbol;Acc:1308806]	0.682	4.06	2.57	0.0088	0.422771	yes	UP	N	N	Y	Y	Y	0.69	4.04
ENSRNOG00000013807.L01	362960	Dmc1	DNA meiotic recombinase 1 [Source:RGD Symbol;Acc:1307611]	0.492	4.04	3.04	0.00895	0.422771	yes	UP	N	N	Y	Y	Y	0.49	4.02
ENSRNOG00000018748.L01	287450	Slc16a11	solute carrier family 16, member 11 [Source:RGD Symbol;Acc:1311125]	48.9	136	1.48	0.00905	0.422771	yes	UP	N	N	Y	Y	Y	49.11	135.31
ENSRNOG00000010507	25335	Mmp7	matrix metallopeptidase 7 [Source:RGD Symbol;Acc:3100]	0	0.697	inf	0.0093	0.422771	yes	UP	N	N	Y	Y	Y	0	0.69
ENSRNOG00000034290	298006	Ccl21	chemokine (C-C motif) ligand 21 [Source:RGD Symbol;Acc:1311996]	55.6	144	1.37	0.0094	0.422771	yes	UP	N	N	Y	Y	Y	55.8	143.17
ENSRNOG00000017959.L01	297444	Ccdc37	coiled-coil domain containing 37 [Source:RGD Symbol;Acc:1305768]	5.36	22.2	2.05	0.00965	0.422771	yes	UP	N	N	Y	Y	Y	5.38	22.07
ENSRNOG00000036825	29229	Spt1	salivary protein 1 [Source:RGD Symbol;Acc:3754]	0	2.19	inf	0.00985	0.422771	yes	UP	N	N	Y	Y	Y	0	2.18
ENSRNOG00000009741.L01	24307	Cyp4b1	cytochrome P450, family 4, subfamily b, polypeptide 1 [Source:RGD Symbol;Acc:2480]	10.8	31.9	1.56	0.00995	0.422771	yes	UP	N	N	Y	Y	Y	10.85	31.7
ENSRNOG00000046377.L01	684480	LOC684480	similar to butyrophilin 3 [Source:RGD Symbol;Acc:1590287]	1.75	7.64	2.13	0.00995	0.422771	yes	UP	N	N	Y	Y	Y	1.76	7.6
ENSRNOG00000030462	360730	Ostn	osteocrin [Source:RGD Symbol;Acc:1303110]	0	0.843	inf	0.01015	0.422771	yes	UP	N	N	N	Y	Y	0	0.84
ENSRNOG00000020254.L01	63840	Per2	period circadian clock 2 [Source:RGD Symbol;Acc:61945]	7.61	20.4	1.42	0.0104	0.422771	yes	UP	N	N	N	Y	Y	7.65	20.3
ENSRNOG00000042741.L01	292477	Adgb	androglobin [Source:RGD Symbol;Acc:1564259]	0.45	2.66	2.56	0.0108	0.422771	yes	UP	N	N	N	Y	Y	0.45	2.65
ENSRNOG00000008170.L01	296345	Jph2	junctophilin 2 [Source:RGD Symbol;Acc:1305196]	14	35.5	1.34	0.0108	0.422771	yes	UP	N	N	N	Y	Y	14.08	35.32
ENSRNOG00000023209	364049	Slamf7	SLAM family member 7 [Source:RGD Symbol;Acc:1560190]	0	0.512	inf	0.01115	0.422771	yes	UP	N	N	N	Y	Y	0	0.51
ENSRNOG00000037451.L01	100912735	LOC100912735	uncharacterized LOC100912735 [Source:RGD Symbol;Acc:6485680]	0	21.4	inf	0.0112	0.422771	yes	UP	N	N	N	Y	Y	0	21.33
ENSRNOG00000019342	83783	Sult1a1	sulfotransferase family, cytosolic, 1A, phenol-preferring, member 1 [Source:RGD Symbol;Acc:3767]	14.8	47.8	1.69	0.01125	0.422771	yes	UP	N	N	N	Y	Y	14.91	47.55
ENSRNOG00000004273.L01	293618	Ifitm1	interferon induced transmembrane protein 1 [Source:RGD Symbol;Acc:1307601]	72.9	203	1.48	0.01125	0.422771	yes	UP	N	N	N	Y	Y	73.28	202.33
ENSRNOG00000018651.L01	290986	Agtpbp1	ATP/GTP binding protein 1 [Source:RGD Symbol;Acc:1306307]	7.1	18.9	1.41	0.01225	0.427811	yes	UP	N	N	N	Y	Y	7.13	18.83
ENSRNOG00000021109.L01	308594	Ccdc114	coiled-coil domain containing 114 [Source:RGD Symbol;Acc:1308141]	1.21	7.4	2.61	0.0126	0.437885	yes	UP	N	N	N	Y	Y	1.22	7.36
ENSRNOG00000037795.L01	689088	Ldlrad1	low density lipoprotein receptor class A domain containing 1 [Source:RGD Symbol;Acc:1597398]	6.92	22.3	1.69	0.0129	0.442369	yes	UP	N	N	N	Y	Y	6.96	22.22
ENSRNOG00000006663.L01	115771	Usp2	ubiquitin specific peptidase 2 [Source:RGD Symbol;Acc:621073]	5.98	15.6	1.39	0.01315	0.446904	yes	UP	N	N	N	Y	Y	6.01	15.56
ENSRNOG00000015718.L01	300990	RGD1307461	similar to RIKEN cDNA 6430571L13 gene; similar to g20 protein [Source:RGD Symbol;Acc:1307461]	3.25	10.3	1.67	0.01315	0.446904	yes	UP	N	N	N	Y	Y	3.27	10.29
ENSRNOG00000019206	100912108	Nupr1	nuclear protein, transcriptional regulator, 1 [Source:RGD Symbol;Acc:69363]	94.9	233	1.29	0.01315	0.446904	yes	UP	N	N	N	Y	Y	95.36	231.74
ENSRNOG00000002120.L01	289586	Spata18	spermatogenesis associated 18 [Source:RGD Symbol;Acc:735208]	1.8	6.19	1.78	0.0132	0.447934	yes	UP	N	N	N	Y	Y	1.81	6.16
ENSRNOG00000009889	24645	Pgm1	phosphoglucomutase 1 [Source:RGD Symbol;Acc:3316]	32.3	78.5	1.28	0.01375	0.460423	yes	UP	N	N	N	Y	Y	32.43	78.14
ENSRNOG00000028781.L01	81642	Abcc6	ATP-binding cassette, subfamily C (CFTR/MRP), member 6 [Source:RGD Symbol;Acc:620268]	0.163	1.26	2.96	0.01405	0.468402	yes	UP	N	N	N	Y	Y	0.16	1.26
ENSRNOG00000012879	79131	Fabp3	fatty acid binding protein 3, muscle and heart [Source:RGD Symbol;Acc:69048]	138	376	1.45	0.0141	0.469382	yes	UP	N	N	N	Y	Y	138.58	374.23
ENSRNOG00000020132.L01	298692	Ttll10	tubulin tyrosine ligase-like family, member 10 [Source:RGD Symbol;Acc:1560839]	6.15	15.6	1.35	0.0143	0.473143	yes	UP	N	N	N	Y	Y	6.18	15.55
ENSRNOG00000012932.L01	499980	Ccdc146	coiled-coil domain containing 146 [Source:RGD Symbol;Acc:1559535]	1.4	7.42	2.4	0.01435	0.473143	yes	UP	N	N	N	Y	Y	1.41	7.38
ENSRNOG00000034221.L01	498278	RGD1562658	similar to RIKEN cDNA 1700009P17 [Source:RGD Symbol;Acc:1562658]	6.12	20.5	1.75	0.01445	0.474102	yes	UP	N	N	N	Y	Y	6.15	20.42
ENSRNOG00000029726	24423	Gstm1	glutathione S-transferase mu 1 [Source:RGD Symbol;Acc:2755]	23.2	60.1	1.37	0.01465	0.477225	yes	UP	N	N	N	Y	Y	23.34	59.8
ENSRNOG00000016603.L01	308410	Rtn2	reticulon 2 [Source:RGD Symbol;Acc:1303245]	55.1	134	1.28	0.01495	0.485608	yes	UP	N	N	N	Y	Y	55.4	132.99
ENSRNOG00000010798.L01	364403	Blk	BLK proto-oncogene, Src family tyrosine kinase [Source:RGD Symbol;Acc:1308859]	0.36	3.06	3.09	0.0151	0.487698	yes	UP	N	N	N	Y	Y	0.36	3.04
ENSRNOG00000046426.L01	501105	Ankrd66	ankyrin repeat domain 66 [Source:RGD Symbol;Acc:1560151]	2.4	11	2.2	0.0151	0.487698	yes	UP	N	N	N	Y	Y	2.42	10.96
ENSRNOG00000032951	690423	Jsrp1	junctional sarcoplasmic reticulum protein 1 [Source:RGD Symbol;Acc:1596084]	34.1	81.7	1.26	0.0152	0.488847	yes	UP	N	N	N	Y	Y	34.3	81.31
ENSRNOG00000029980.L01	353227	Zbtb16	zinc finger and BTB domain containing 16 [Source:RGD Symbol;Acc:727921]	2.6	6.74	1.37	0.0153	0.491118	yes	UP	N	N	N	Y	Y	2.62	6.71
ENSRNOG00000025014	303815	RGD1563956	similar to 60S ribosomal protein L12 [Source:RGD Symbol;Acc:1563956]	0	0.922	inf	0.0154	0.491118	yes	UP	N	N	N	Y	Y	0	0.92
ENSRNOG00000036802.L01	362256	Snhg11	small nucleolar RNA host gene 11 (non-protein coding) [Source:RGD Symbol;Acc:1563912]	5.18	13.3	1.36	0.0154	0.491118	yes	UP	N	N	N	Y	Y	5.21	13.22
ENSRNOG00000013532	24959	Pgam2	phosphoglycerate mutase 2 (muscle) [Source:RGD Symbol;Acc:3313]	412	1140	1.47	0.0155	0.492926	yes	UP	N	N	N	Y	Y	414	1138.88
ENSRNOG00000021855.L01	296952	Kcp	kielin/chordin-like protein [Source:RGD Symbol;Acc:1561119]	3.26	13.6	2.06	0.01555	0.49356	yes	UP	N	N	N	Y	Y	3.28	13.48
ENSRNOG00000006052.L01	311642	Sulf2	sulfatase 2 [Source:RGD Symbol;Acc:1305078]	10.5	25.6	1.28	0.0156	0.49356	yes	UP	N	N	N	Y	Y	10.58	25.49
ENSRNOG00000046231.L01	682930	Cacna1s	calcium channel, voltage-dependent, L type, alpha 1S subunit [Source:RGD Symbol;Acc:70983]	22.3	53.5	1.26	0.01565	0.49356	yes	UP	N	N	N	Y	Y	22.41	53.19
ENSRNOG00000002976.L01	303920	Maats1	MYCBP-associated, testis expressed 1 [Source:RGD Symbol;Acc:1305539]	0.712	4.06	2.51	0.016	0.501818	yes	UP	N	N	N	Y	Y	0.71	4.04
ENSRNOG00000012040.L01	361206	Slc25a48	solute carrier family 25, member 48 [Source:RGD Symbol;Acc:1563703]	2.85	9.78	1.78	0.016	0.501818	yes	UP	N	N	N	Y	Y	2.87	9.73
ENSRNOG00000020459.L01	54291	Rgs11	regulator of G-protein signaling 11 [Source:RGD Symbol;Acc:3563]	10.7	27.2	1.35	0.01635	0.507206	yes	UP	N	N	N	Y	Y	10.73	27.02
ENSRNOG00000008005.L01	362530	Akna	AT-hook transcription factor [Source:RGD Symbol;Acc:1308202]	2.47	7.38	1.58	0.0164	0.508065	yes	UP	N	N	N	Y	Y	2.48	7.35
ENSRNOG00000021356.L01	303242	Dnah2	dynein, axonemal, heavy chain 2 [Source:RGD Symbol;Acc:1565087]	2.65	9.95	1.91	0.0165	0.509776	yes	UP	N	N	N	Y	Y	2.66	9.91
ENSRNOG00000007957.L01	287609	Bzrap1	benzodiazepine receptor (peripheral) associated protein 1 [Source:RGD Symbol;Acc:708563]	2.7	6.89	1.35	0.01655	0.509937	yes	UP	N	N	N	Y	Y	2.71	6.85
ENSRNOG00000007037.L01	679641	LOC679641	similar to CG4329-PA, isoform A [Source:RGD Symbol;Acc:1585948]	0.604	3.52	2.54	0.01655	0.509937	yes	UP	N	N	N	Y	Y	0.61	3.5
ENSRNOG00000028356	361824	Chchd10	coiled-coil-helix-coiled-coil-helix domain containing 10 [Source:RGD Symbol;Acc:1359417]	202	472	1.23	0.01665	0.512325	yes	UP	N	N	N	Y	Y	202.66	469.34
ENSRNOG00000008560.L01	362580	Ccdc30	coiled-coil domain containing 30 [Source:RGD Symbol;Acc:1305604]	2.77	10.5	1.92	0.0167	0.51317	yes	UP	N	N	N	Y	Y	2.79	10.46
ENSRNOG00000013468.L01	362676	Fam213b	family with sequence similarity 213, member B [Source:RGD Symbol;Acc:1308251]	12.2	41.1	1.75	0.0168	0.514853	yes	UP	N	N	N	Y	Y	12.3	40.94
ENSRNOG00000001873.L01	25041	P2rx6	purinergic receptor P2X, ligand-gated ion channel, 6 [Source:RGD Symbol;Acc:3243]	6.36	19.2	1.59	0.0172	0.524289	yes	UP	N	N	N	Y	Y	6.39	19.06
ENSRNOG00000012714	499419	RGD1564149	similar to Protein C21orf58 [Source:RGD Symbol;Acc:1564149]	2.52	10.3	2.02	0.01725	0.524409	yes	UP	N	N	N	Y	Y	2.54	10.22
ENSRNOG00000010337.L01	65202	Slc13a2	solute carrier family 13 (sodium-dependent dicarboxylate transporter), member 2 [Source:RGD Symbol;Acc:61920]	3.41	11.9	1.8	0.0175	0.529183	yes	UP	N	N	N	Y	Y	3.42	11.8
ENSRNOG00000022721.L01	307851	Clec18a	C-type lectin domain family 18, member A [Source:RGD Symbol;Acc:1559899]	0.126	3.31	4.72	0.0179	0.538419	yes	UP	N	N	N	Y	Y	0.13	3.3
ENSRNOG00000021602.L01	363139	Zmynd10	zinc finger, MYND-type containing 10 [Source:RGD Symbol;Acc:1303250]	9.7	25	1.37	0.01795	0.53921	yes	UP	N	N	N	Y	Y	9.74	24.89
ENSRNOG00000021241.L01	66023	Gfra4	GDNF family receptor alpha 4 [Source:RGD Symbol;Acc:620503]	0.937	5.01	2.42	0.018	0.539289	yes	UP	N	N	N	Y	Y	0.94	4.98
ENSRNOG00000009032.L01	362415	Ttll3	tubulin tyrosine ligase-like family, member 3 [Source:RGD Symbol;Acc:1311255]	3.2	10.4	1.71	0.0183	0.546839	yes	UP	N	N	N	Y	Y	3.22	10.39
ENSRNOG00000009336.L01	286997	Mapk15	mitogen-activated protein kinase 15 [Source:RGD Symbol;Acc:628675]	2.04	9.25	2.18	0.01845	0.548496	yes	UP	N	N	N	Y	Y	2.05	9.21
ENSRNOG00000012134.L01	25722	Scn4a	sodium channel, voltage-gated, type IV, alpha subunit [Source:RGD Symbol;Acc:3636]	7.87	19	1.27	0.0185	0.548496	yes	UP	N	N	N	Y	Y	7.91	18.92
ENSRNOG00000038074	498555	LOC498555	similar to 60S acidic ribosomal protein P2 [Source:RGD Symbol;Acc:1590791]	115	282	1.29	0.0185	0.548496	yes	UP	N	N	N	Y	Y	115.75	280.85
ENSRNOG00000014893.L01	292165	Wdr63	WD repeat domain 63 [Source:RGD Symbol;Acc:1563105]	1	4.03	2.01	0.01855	0.54855	yes	UP	N	N	N	Y	Y	1.01	4.01
ENSRNOG00000050151.L01	287867	Ccdc40	coiled-coil domain containing 40 [Source:RGD Symbol;Acc:1592118]	0.71	3.1	2.13	0.01935	0.564148	yes	UP	N	N	N	Y	Y	0.71	3.08
ENSRNOG00000025860.L01	291853	Ccdc135	coiled-coil domain containing 135 [Source:RGD Symbol;Acc:1565601]	1.5	7.24	2.27	0.01935	0.564148	yes	UP	N	N	N	Y	Y	1.51	7.2
ENSRNOG00000018241.L01	306570	Ank1	ankyrin 1, erythrocytic [Source:RGD Symbol;Acc:1309620]	35.6	82.9	1.22	0.01945	0.564893	yes	UP	N	N	N	Y	Y	35.81	82.54
ENSRNOG00000018792.L01	302991	Tekt4	tektin 4 [Source:RGD Symbol;Acc:1308075]	1.1	5.54	2.33	0.01965	0.56925	yes	UP	N	N	N	Y	Y	1.11	5.51
ENSRNOG00000012428.L01	54267	Maf	v-maf avian musculoaponeurotic fibrosarcoma oncogene homolog [Source:RGD Symbol;Acc:3034]	5.38	13.8	1.36	0.02035	0.583553	yes	UP	N	N	N	Y	Y	5.41	13.72
ENSRNOG00000018656.L01	25028	Ampd1	adenosine monophosphate deaminase 1 [Source:RGD Symbol;Acc:2109]	31.3	84.6	1.44	0.0204	0.583553	yes	UP	N	N	N	Y	Y	31.45	84.25
ENSRNOG00000037814.L01	308436	Cxcl17	chemokine (C-X-C motif) ligand 17 [Source:RGD Symbol;Acc:1304717]	20.8	55.3	1.41	0.0205	0.584212	yes	UP	N	N	N	Y	Y	20.94	55.01
ENSRNOG00000004518.L01	50688	Cacnb1	calcium channel, voltage-dependent, beta 1 subunit [Source:RGD Symbol;Acc:68382]	4.23	11.3	1.42	0.02085	0.589706	yes	UP	N	N	N	Y	Y	4.25	11.25
ENSRNOG00000009061.L01	366347	RGD1310641	similar to hypothetical protein [Source:RGD Symbol;Acc:1310641]	1.94	7.9	2.03	0.02105	0.59191	yes	UP	N	N	N	Y	Y	1.95	7.86
ENSRNOG00000011177	50683	Sftpc	surfactant protein C [Source:RGD Symbol;Acc:3666]	0	0.511	inf	0.02155	0.59191	yes	UP	N	N	N	Y	Y	0	0.51
ENSRNOG00000025638	290359	Npm2	nucleophosmin/nucleoplasmin 2 [Source:RGD Symbol;Acc:727816]	0	0.729	inf	0.02155	0.59191	yes	UP	N	N	N	Y	Y	0	0.73
ENSRNOG00000002340	100361079	LOC100361079	ribosomal protein L36-like [Source:RGD Symbol;Acc:2320881]	0	1.97	inf	0.02155	0.59191	yes	UP	N	N	N	Y	Y	0	1.96
ENSRNOG00000020125	100913063	LOC100913063	B-cell antigen receptor complex-associated protein alpha chain-like [Source:RGD Symbol;Acc:6484896]	0	0.601	inf	0.02155	0.59191	yes	UP	N	N	N	Y	Y	0	0.6
ENSRNOG00000004762.L01	314416	Ak7	adenylate kinase 7 [Source:RGD Symbol;Acc:1309600]	1.4	5.56	1.99	0.0222	0.601063	yes	UP	N	N	N	Y	Y	1.41	5.54
ENSRNOG00000021174	246233	Macrod1	MACRO domain containing 1 [Source:RGD Symbol;Acc:628701]	59	133	1.17	0.02435	0.646966	yes	UP	N	N	N	Y	Y	59.22	131.93
ENSRNOG00000006146	362708	Trim54	tripartite motif-containing 54 [Source:RGD Symbol;Acc:1306453]	59	130	1.14	0.02445	0.647356	yes	UP	N	N	N	Y	Y	59.27	129.31
ENSRNOG00000004939.L01	287646	Ttll6	tubulin tyrosine ligase-like family, member 6 [Source:RGD Symbol;Acc:1311922]	0.259	1.95	2.91	0.02455	0.648496	yes	UP	N	N	N	Y	Y	0.26	1.94
ENSRNOG00000001311.L01	690407	Rab36	RAB36, member RAS oncogene family [Source:RGD Symbol;Acc:1596098]	1.92	8.2	2.09	0.02485	0.650945	yes	UP	N	N	N	Y	Y	1.93	8.16
ENSRNOG00000018310.L01	292138	Eno4	enolase family member 4 [Source:RGD Symbol;Acc:1308333]	1.68	6.33	1.92	0.0249	0.650945	yes	UP	N	N	N	Y	Y	1.69	6.31
ENSRNOG00000016566.L01	500901	Arhgap39	Rho GTPase activating protein 39 [Source:RGD Symbol;Acc:1593158]	4.78	12	1.33	0.02495	0.651316	yes	UP	N	N	N	Y	Y	4.8	11.95
ENSRNOG00000013320.L01	500441	RGD1561916	similar to testes development-related NYD-SP22 isoform 1 [Source:RGD Symbol;Acc:1561916]	2.2	10.3	2.23	0.0251	0.651684	yes	UP	N	N	N	Y	Y	2.21	10.27
ENSRNOG00000018997.L01	311570	Myh7b	myosin, heavy chain 7B, cardiac muscle, beta [Source:RGD Symbol;Acc:1307994]	2.12	5.88	1.47	0.0253	0.653894	yes	UP	N	N	N	Y	Y	2.13	5.85
ENSRNOG00000033162	113901	Chia	chitinase, acidic [Source:RGD Symbol;Acc:1303058]	1.27	8.39	2.73	0.0254	0.654992	yes	UP	N	N	N	Y	Y	1.27	8.36
ENSRNOG00000020992	140927	Selenbp1	selenium binding protein 1 [Source:RGD Symbol;Acc:620571]	20.3	46	1.18	0.02625	0.6731	yes	UP	N	N	N	Y	Y	20.41	45.81
ENSRNOG00000049541	65155	Alas1	aminolevulinate, delta-, synthase 1 [Source:RGD Symbol;Acc:68392]	46.6	101	1.12	0.0265	0.677983	yes	UP	N	N	N	Y	Y	46.8	100.87
ENSRNOG00000014233	360626	Krt19	keratin 19 [Source:RGD Symbol;Acc:619936]	133	304	1.19	0.0268	0.681835	yes	UP	N	N	N	Y	Y	133.46	302.22
ENSRNOG00000024523.L01	360654	Dnai2	dynein, axonemal, intermediate chain 2 [Source:RGD Symbol;Acc:1359602]	1.18	4.54	1.95	0.0269	0.681835	yes	UP	N	N	N	Y	Y	1.18	4.52
ENSRNOG00000005491.L01	314847	Best3	bestrophin 3 [Source:RGD Symbol;Acc:1305439]	0.563	2.06	1.87	0.02695	0.681835	yes	UP	N	N	N	Y	Y	0.57	2.05
ENSRNOG00000026548	287411	Dhrs7c	dehydrogenase/reductase (SDR family) member 7C [Source:RGD Symbol;Acc:1306989]	60.2	130	1.1	0.0277	0.695401	yes	UP	N	N	N	Y	Y	60.54	128.94
ENSRNOG00000017842.L01	24768	Scnn1g	sodium channel, non-voltage-gated 1, gamma subunit [Source:RGD Symbol;Acc:3641]	1.98	6.47	1.71	0.0279	0.697831	yes	UP	N	N	N	Y	Y	1.99	6.44
ENSRNOG00000002873.L01	287346	Fam183b	family with sequence similarity 183, member B [Source:RGD Symbol;Acc:1561932]	4.25	35.5	3.06	0.02795	0.697831	yes	UP	N	N	N	Y	Y	4.27	35.34
ENSRNOG00000017512.L01	309147	Aldh3b1	aldehyde dehydrogenase 3 family, member B1 [Source:RGD Symbol;Acc:1359546]	2.26	8.42	1.9	0.02795	0.697831	yes	UP	N	N	N	Y	Y	2.27	8.38
ENSRNOG00000029221	24594	Klk1b3	kallikrein 1-related peptidase B3 [Source:RGD Symbol;Acc:3175]	4.02	17.8	2.14	0.0282	0.701764	yes	UP	N	N	N	Y	Y	4.04	17.68
ENSRNOG00000021088.L01	295261	Tmod4	tropomodulin 4 [Source:RGD Symbol;Acc:1308940]	55.4	117	1.08	0.0286	0.710166	yes	UP	N	N	N	Y	Y	55.65	116.92
ENSRNOG00000002504.L01	498305	Spata17	spermatogenesis associated 17 [Source:RGD Symbol;Acc:1565282]	0.985	7.62	2.95	0.029	0.71775	yes	UP	N	N	N	Y	Y	0.99	7.58
ENSRNOG00000050924.L01	684516	Kcnc4	potassium voltage gated channel, Shaw-related subfamily, member 4 [Source:RGD Symbol;Acc:1589169]	3.88	10.7	1.47	0.0292	0.719571	yes	UP	N	N	N	Y	Y	3.9	10.68
ENSRNOG00000013027.L01	300444	Rgl3	ral guanine nucleotide dissociation stimulator-like 3 [Source:RGD Symbol;Acc:1309756]	3.16	8.8	1.48	0.02935	0.72015	yes	UP	N	N	N	Y	Y	3.17	8.75
ENSRNOG00000013676.L01	29337	Plcg2	phospholipase C, gamma 2 [Source:RGD Symbol;Acc:3348]	3.55	8.76	1.3	0.02965	0.724389	yes	UP	N	N	N	Y	Y	3.57	8.71
ENSRNOG00000008897.L01	300066	Gga1	golgi associated, gamma adaptin ear containing, ARF binding protein 1 [Source:RGD Symbol;Acc:1307770]	35.5	72.9	1.04	0.0308	0.746081	yes	UP	N	N	N	Y	Y	35.63	72.51
ENSRNOG00000018485.L01	311730	Gpr155	G protein-coupled receptor 155 [Source:RGD Symbol;Acc:1309162]	9.13	19.6	1.1	0.03085	0.746498	yes	UP	N	N	N	Y	Y	9.17	19.49
ENSRNOG00000002800.L01	302421	Gdpd2	glycerophosphodiester phosphodiesterase domain containing 2 [Source:RGD Symbol;Acc:1560780]	12.1	27.1	1.17	0.0311	0.747403	yes	UP	N	N	N	Y	Y	12.12	26.93
ENSRNOG00000003245	29658	Cacng1	calcium channel, voltage-dependent, gamma subunit 1 [Source:RGD Symbol;Acc:2249]	16.1	38.9	1.27	0.0312	0.747815	yes	UP	N	N	N	Y	Y	16.2	38.7
ENSRNOG00000002827.L01	302920	Rbfox1	RNA binding protein, fox-1 homolog (C. elegans) 1 [Source:RGD Symbol;Acc:1311210]	19.3	41.4	1.1	0.0314	0.750239	yes	UP	N	N	N	Y	Y	19.45	41.23
ENSRNOG00000002256	305235	Art3	ADP-ribosyltransferase 3 [Source:RGD Symbol;Acc:628833]	30.6	66.2	1.11	0.0319	0.757814	yes	UP	N	N	N	Y	Y	30.77	65.86
ENSRNOG00000006110.L01	297748	Jph1	junctophilin 1 [Source:RGD Symbol;Acc:1308789]	8.03	18.2	1.18	0.03195	0.757814	yes	UP	N	N	N	Y	Y	8.06	18.12
ENSRNOG00000033517	100360791	LOC100360791	tumor protein, translationally-controlled 1 [Source:RGD Symbol;Acc:2321467]	2.14	12.3	2.52	0.0323	0.763729	yes	UP	N	N	N	Y	Y	2.15	12.25
ENSRNOG00000012450.L01	361415	Dynlrb2	dynein light chain roadblock-type 2 [Source:RGD Symbol;Acc:1306930]	9.02	37.9	2.07	0.03245	0.765685	yes	UP	N	N	N	Y	Y	9.06	37.67
ENSRNOG00000027550.L01	361508	Mzf1	myeloid zinc finger 1 [Source:RGD Symbol;Acc:1308391]	2.15	6.28	1.55	0.03295	0.774274	yes	UP	N	N	N	Y	Y	2.16	6.25
ENSRNOG00000011967.L01	313749	Nphp4	nephronophthisis 4 [Source:RGD Symbol;Acc:1560172]	0.966	3.74	1.95	0.0333	0.777683	yes	UP	N	N	N	Y	Y	0.97	3.72
ENSRNOG00000047321	360504	Hba2	hemoglobin, alpha 2 [Source:RGD Symbol;Acc:1359364]	466	1010	1.11	0.0333	0.777683	yes	UP	N	N	N	Y	Y	468.13	1001.91
ENSRNOG00000021200	310681	Hfe2	hemochromatosis type 2 (juvenile) [Source:RGD Symbol;Acc:1310195]	42.9	90.9	1.08	0.0339	0.783658	yes	UP	N	N	N	Y	Y	43.12	90.46
ENSRNOG00000048564	100364427	LOC100364427	ribosomal protein S12-like [Source:RGD Symbol;Acc:2321033]	1.75	26.2	3.9	0.034	0.785172	yes	UP	N	N	N	Y	Y	1.76	26.03
ENSRNOG00000011033.L01	298532	Tekt2	tektin 2 (testicular) [Source:RGD Symbol;Acc:1311065]	1.44	6.25	2.12	0.03455	0.79465	yes	UP	N	N	N	Y	Y	1.44	6.22
ENSRNOG00000014761.L01	171099	Rasd2	RASD family, member 2 [Source:RGD Symbol;Acc:628594]	4.16	10.1	1.29	0.03525	0.801841	yes	UP	N	N	N	Y	Y	4.18	10.09
ENSRNOG00000020339.L01	309459	Neurl1	neuralized E3 ubiquitin protein ligase 1 [Source:RGD Symbol;Acc:1307021]	3.85	9.33	1.28	0.0357	0.808041	yes	UP	N	N	N	Y	Y	3.87	9.28
ENSRNOG00000020620.L01	252958	Ppp1r32	protein phosphatase 1, regulatory subunit 32 [Source:RGD Symbol;Acc:708532]	0.685	4.9	2.84	0.03645	0.819315	yes	UP	N	N	N	Y	Y	0.69	4.88
ENSRNOG00000003273.L01	360604	Spata20	spermatogenesis associated 20 [Source:RGD Symbol;Acc:735087]	0.637	2.74	2.1	0.03715	0.827696	yes	UP	N	N	N	Y	Y	0.64	2.72
ENSRNOG00000017473.L01	303534	Ttc25	tetratricopeptide repeat domain 25 [Source:RGD Symbol;Acc:1311859]	1.1	3.74	1.77	0.03735	0.828403	yes	UP	N	N	N	Y	Y	1.11	3.73
ENSRNOG00000024468.L01	363286	Traf3ip1	TNF receptor-associated factor 3 interacting protein 1 [Source:RGD Symbol;Acc:1309252]	5.77	13.2	1.2	0.0374	0.828403	yes	UP	N	N	N	Y	Y	5.79	13.16
ENSRNOG00000017403.L01	499264	Apobr	apolipoprotein B receptor [Source:RGD Symbol;Acc:1565169]	1.05	3.07	1.55	0.03745	0.828704	yes	UP	N	N	N	Y	Y	1.06	3.06
ENSRNOG00000012972.L01	25290	Alox5	arachidonate 5-lipoxygenase [Source:RGD Symbol;Acc:2096]	3.98	10.5	1.4	0.03775	0.832914	yes	UP	N	N	N	Y	Y	4	10.42
ENSRNOG00000011306	337868	Myod1	myogenic differentiation 1 [Source:RGD Symbol;Acc:631429]	0.203	2.46	3.6	0.03805	0.834681	yes	UP	N	N	N	Y	Y	0.2	2.45
ENSRNOG00000012761.L01	311833	Ak8	adenylate kinase 8 [Source:RGD Symbol;Acc:1303144]	0.206	1.97	3.26	0.0381	0.834973	yes	UP	N	N	N	Y	Y	0.21	1.96
ENSRNOG00000000563.L01	309837	Adamts14	ADAM metallopeptidase with thrombospondin type 1 motif, 14 [Source:RGD Symbol;Acc:1308899]	1.08	4.16	1.94	0.03865	0.843778	yes	UP	N	N	N	Y	Y	1.09	4.14
ENSRNOG00000024957	298524	Dnali1	dynein, axonemal, light intermediate chain 1 [Source:RGD Symbol;Acc:1309260]	1.29	6.84	2.41	0.0396	0.858736	yes	UP	N	N	N	Y	Y	1.29	6.8
ENSRNOG00000037668.L01	499468	Ccdc162	coiled-coil domain containing 162 [Source:RGD Symbol;Acc:1561147]	4.68	19.1	2.03	0.03975	0.858736	yes	UP	N	N	N	Y	Y	4.7	19
ENSRNOG00000020580.L01	500956	LOC500956	hypothetical protein LOC500956 [Source:RGD Symbol;Acc:1565995]	6.85	16.5	1.26	0.03985	0.859266	yes	UP	N	N	N	Y	Y	6.88	16.37
ENSRNOG00000015476.L01	192207	Ubxn11	UBX domain protein 11 [Source:RGD Symbol;Acc:620769]	3.05	8.55	1.49	0.04035	0.868402	yes	UP	N	N	N	Y	Y	3.07	8.5
ENSRNOG00000009902	287653	Lrrc46	leucine rich repeat containing 46 [Source:RGD Symbol;Acc:1303311]	2.64	10.3	1.97	0.04045	0.868912	yes	UP	N	N	N	Y	Y	2.65	10.26
ENSRNOG00000020421.L01	310787	Fndc7	fibronectin type III domain containing 7 [Source:RGD Symbol;Acc:1309189]	0.793	3.03	1.94	0.04065	0.872385	yes	UP	N	N	N	Y	Y	0.8	3.02
ENSRNOG00000008930.L01	252878	Tnfsf15	tumor necrosis factor (ligand) superfamily, member 15 [Source:RGD Symbol;Acc:628735]	2.78	6.74	1.28	0.0411	0.879555	yes	UP	N	N	N	Y	Y	2.79	6.71
ENSRNOG00000013585.L01	363118	Nmnat3	nicotinamide nucleotide adenylyltransferase 3 [Source:RGD Symbol;Acc:1309140]	3.55	10.3	1.53	0.0411	0.879555	yes	UP	N	N	N	Y	Y	3.57	10.23
ENSRNOG00000015290	100911515	Tpi1	triosephosphate isomerase 1 [Source:RGD Symbol;Acc:3896]	100	208	1.05	0.04135	0.881591	yes	UP	N	N	N	Y	Y	100.86	207.47
ENSRNOG00000047307.L01	313173	Cntfr	ciliary neurotrophic factor receptor [Source:RGD Symbol;Acc:1303100]	6.61	17.1	1.37	0.042	0.891507	yes	UP	N	N	N	Y	Y	6.64	17.02
ENSRNOG00000013053.L01	293874	Trpm6	transient receptor potential cation channel, subfamily M, member 6 [Source:RGD Symbol;Acc:1309942]	0.424	3.2	2.92	0.04205	0.891507	yes	UP	N	N	N	Y	Y	0.43	3.19
ENSRNOG00000040171.L01	681383	LOC681383	similar to Protein C10orf11 homolog [Source:RGD Symbol;Acc:1596707]	5.34	27.5	2.36	0.04205	0.891507	yes	UP	N	N	N	Y	Y	5.36	27.36
ENSRNOG00000026493.L01	361276	Cdnf	cerebral dopamine neurotrophic factor [Source:RGD Symbol;Acc:1307600]	4.3	13.1	1.6	0.04245	0.897481	yes	UP	N	N	N	Y	Y	4.32	13.02
ENSRNOG00000048961.L01	117095	Bhlhe41	basic helix-loop-helix family, member e41 [Source:RGD Symbol;Acc:70900]	3.27	8.45	1.37	0.0432	0.908277	yes	UP	N	N	N	Y	Y	3.29	8.41
ENSRNOG00000025287	497957	RGD1565611	RGD1565611 [Source:RGD Symbol;Acc:1565611]	2.82	11.3	2.01	0.0432	0.908277	yes	UP	N	N	N	Y	Y	2.83	11.26
ENSRNOG00000026870.L01	304081	Clic6	chloride intracellular channel 6 [Source:RGD Symbol;Acc:727938]	3.13	7.6	1.28	0.04345	0.910381	yes	UP	N	N	N	Y	Y	3.15	7.56
ENSRNOG00000037025	446171	Smgc	submandibular gland protein C [Source:RGD Symbol;Acc:1302995]	6.71	26.6	1.98	0.0435	0.910381	yes	UP	N	N	N	Y	Y	6.75	26.45
ENSRNOG00000022178.L01	295980	Dcdc5	doublecortin domain containing 5 [Source:RGD Symbol;Acc:1562221]	2.03	7.47	1.88	0.0436	0.911636	yes	UP	N	N	N	Y	Y	2.04	7.44
ENSRNOG00000019271.L01	363167	Ulk4	unc-51 like kinase 4 [Source:RGD Symbol;Acc:1565726]	1.24	4.46	1.85	0.0438	0.913302	yes	UP	N	N	N	Y	Y	1.24	4.44
ENSRNOG00000026309.L01	100911585	Lrrc23	leucine rich repeat containing 23 [Source:RGD Symbol;Acc:1304779]	1.74	6.92	1.99	0.0439	0.91455	yes	UP	N	N	N	Y	Y	1.74	6.88
ENSRNOG00000007900	500065	Tspan33	tetraspanin 33 [Source:RGD Symbol;Acc:1560915]	0.506	2.7	2.41	0.04425	0.919318	yes	UP	N	N	N	Y	Y	0.51	2.68
ENSRNOG00000050430.L01	25156	Vav1	vav 1 guanine nucleotide exchange factor [Source:RGD Symbol;Acc:3951]	1.09	3.58	1.71	0.0444	0.919916	yes	UP	N	N	N	Y	Y	1.1	3.56
ENSRNOG00000004430.L01	360672	Cep131	centrosomal protein 131 [Source:RGD Symbol;Acc:1307745]	10.7	22.9	1.1	0.04445	0.920115	yes	UP	N	N	N	Y	Y	10.7	22.75
ENSRNOG00000025883.L01	688862	Ip6k3	inositol hexaphosphate kinase 3 [Source:MGI Symbol;Acc:MGI:3045325]	1.45	5.44	1.91	0.04455	0.920511	yes	UP	N	N	N	Y	Y	1.46	5.41
ENSRNOG00000032708.L01	688090	LOC688090	similar to RT1 class II histocompatibility antigen, B-1 beta chain precursor (RT1.B-beta(1)) [Source:RGD Symbol;Acc:1593573]	8.38	20.2	1.27	0.0453	0.929262	yes	UP	N	N	N	Y	Y	8.42	20.12
ENSRNOG00000022242.L01	246759	Cxcl9	chemokine (C-X-C motif) ligand 9 [Source:RGD Symbol;Acc:628798]	0.546	4.35	2.99	0.046	0.940233	yes	UP	N	N	N	Y	Y	0.55	4.33
ENSRNOG00000006931.L01	315500	Eepd1	endonuclease/exonuclease/phosphatase family domain containing 1 [Source:RGD Symbol;Acc:1307401]	8.89	19.2	1.11	0.0462	0.942629	yes	UP	N	N	N	Y	Y	8.93	19.11
ENSRNOG00000010068.L01	296635	Ppapdc3	phosphatidic acid phosphatase type 2 domain containing 3 [Source:RGD Symbol;Acc:1305821]	13.5	30.2	1.16	0.04665	0.950958	yes	UP	N	N	N	Y	Y	13.57	30.04
ENSRNOG00000008057.L01	300242	Krt7	keratin 7 [Source:RGD Symbol;Acc:1310865]	21.2	44.1	1.06	0.0467	0.951126	yes	UP	N	N	N	Y	Y	21.26	43.83
ENSRNOG00000006767.L01	296257	Cst7	cystatin F (leukocystatin) [Source:RGD Symbol;Acc:1309154]	0.938	5.01	2.42	0.04695	0.952974	yes	UP	N	N	N	Y	Y	0.94	4.98
ENSRNOG00000015554.L01	100362785	Ankdd1a	ankyrin repeat and death domain containing 1A [Source:RGD Symbol;Acc:1586052]	0.675	2.1	1.64	0.047	0.952974	yes	UP	N	N	N	Y	Y	0.68	2.09
ENSRNOG00000018145	311849	Crat	carnitine O-acetyltransferase [Source:RGD Symbol;Acc:1303031]	55.7	115	1.04	0.0473	0.957466	yes	UP	N	N	N	Y	Y	56.01	114.02
ENSRNOG00000012964.L01	308163	Ccr6	chemokine (C-C motif) receptor 6 [Source:RGD Symbol;Acc:1308562]	0.437	2.07	2.24	0.04745	0.957466	yes	UP	N	N	N	Y	Y	0.44	2.06
ENSRNOG00000007999	286965	Abra	actin-binding Rho activating protein [Source:RGD Symbol;Acc:708493]	11.1	25.6	1.2	0.0475	0.957466	yes	UP	N	N	N	Y	Y	11.16	25.48
ENSRNOG00000017248.L01	301518	Prkag3	protein kinase, AMP-activated, gamma 3 non-catalytic subunit [Source:RGD Symbol;Acc:1308698]	4.34	10.6	1.28	0.04825	0.965424	yes	UP	N	N	N	Y	Y	4.36	10.52
ENSRNOG00000007668.L01	366949	Mafa	v-maf avian musculoaponeurotic fibrosarcoma oncogene A [Source:RGD Symbol;Acc:1562627]	4.49	11.1	1.3	0.04865	0.970018	yes	UP	N	N	N	Y	Y	4.51	11.02
ENSRNOG00000025479.L01	313149	Cfap221	cilia and flagella associated protein 221 [Source:RGD Symbol;Acc:1584968]	0.469	2.38	2.34	0.04915	0.973314	yes	UP	N	N	N	Y	Y	0.47	2.37
ENSRNOG00000001055.L01	304469	Rilpl1	Rab interacting lysosomal protein-like 1 [Source:RGD Symbol;Acc:1307973]	40	87.3	1.13	0.04935	0.975434	yes	UP	N	N	N	Y	Y	40.16	86.83
ENSRNOG00000027630.L01	297720	Casc1	cancer susceptibility candidate 1 [Source:RGD Symbol;Acc:1311213]	8.23	19.1	1.21	0.04965	0.977968	yes	UP	N	N	N	Y	Y	8.27	19

## Sheet: DEG3 Y5-8 vs O1-4
GeneAcc	EntrezGeneID	GeneName	Desc	Value_1	Value_2	log2fc	p-value	q-value	DEG:PV=0.05:SELECT	DEG:UP_DOWN	DEG:QV<=0.05	DEG:QV<=0.10	DEG:PV<=0.01	DEG:PV<=0.05	DEG:FC2>=0	EXP:Y5-8:FPKM	EXP:O1-4:FPKM
ENSRNOG00000005003.L01	29714	Ptprn2	protein tyrosine phosphatase, receptor type, N polypeptide 2 [Source:RGD Symbol;Acc:61904]	19.1	3.02	-2.66	5e-05	0.0853458	yes	DOWN	N	Y	Y	Y	Y	19.71	2.93
ENSRNOG00000033162	113901	Chia	chitinase, acidic [Source:RGD Symbol;Acc:1303058]	80.7	12.5	-2.69	5e-05	0.0853458	yes	DOWN	N	Y	Y	Y	Y	83.23	12.17
ENSRNOG00000015477.L01	305999	Nkx3-1	NK3 homeobox 1 [Source:RGD Symbol;Acc:1305369]	31.4	3.24	-3.28	5e-05	0.0853458	yes	DOWN	N	Y	Y	Y	Y	32.41	3.15
ENSRNOG00000016953.L01	307838	Chst4	carbohydrate (N-acetylglucosamine 6-O) sulfotransferase 4 [Source:RGD Symbol;Acc:1310798]	32	1.52	-4.39	5e-05	0.0853458	yes	DOWN	N	Y	Y	Y	Y	33	1.48
ENSRNOG00000021902.L01	497856	Rmi2	RecQ mediated genome instability 2 [Source:RGD Symbol;Acc:1563163]	1.88	0	#NAME?	5e-05	0.0853458	yes	DOWN	N	Y	Y	Y	Y	1.94	0
ENSRNOG00000050181	100911881	LOC100911881	chitinase domain-containing protein 1-like [Source:RGD Symbol;Acc:6490147]	1.49	0	#NAME?	0.0001	0.146307	yes	DOWN	N	N	Y	Y	Y	1.53	0
ENSRNOG00000012176.L01	84590	Rab27b	RAB27B, member RAS oncogene family [Source:RGD Symbol;Acc:620114]	15.9	3.19	-2.31	0.0002	0.215611	yes	DOWN	N	N	Y	Y	Y	16.35	3.1
ENSRNOG00000028636.L01	497083	Xkr5	XK, Kell blood group complex subunit-related family, member 5 [Source:RGD Symbol;Acc:1359335]	0.721	0	#NAME?	0.0003	0.243504	yes	DOWN	N	N	Y	Y	Y	0.74	0
ENSRNOG00000017514.L01	306956	Btn1a1	butyrophilin, subfamily 1, member A1 [Source:RGD Symbol;Acc:1306984]	12.5	1.54	-3.02	0.0004	0.243504	yes	DOWN	N	N	Y	Y	Y	12.88	1.5
ENSRNOG00000017159.L01	307563	Dsc3	desmocollin 3 [Source:RGD Symbol;Acc:1311782]	13.4	2.88	-2.22	0.00045	0.243504	yes	DOWN	N	N	Y	Y	Y	13.77	2.79
ENSRNOG00000016853.L01	291755	Dsg1	desmoglein 1 [Source:RGD Symbol;Acc:1309925]	8.66	0.937	-3.21	0.00055	0.243504	yes	DOWN	N	N	Y	Y	Y	8.93	0.91
ENSRNOG00000012037.L01	29750	Galnt7	polypeptide N-acetylgalactosaminyltransferase 7 [Source:RGD Symbol;Acc:620362]	62.8	13.6	-2.21	0.00075	0.243504	yes	DOWN	N	N	Y	Y	Y	64.73	13.2
ENSRNOG00000032404.L01	360243	Top2a	topoisomerase (DNA) II alpha [Source:RGD Symbol;Acc:62048]	7.45	1.24	-2.59	0.00075	0.243504	yes	DOWN	N	N	Y	Y	Y	7.68	1.2
ENSRNOG00000023920	100363196	LOC100363196	rCG51614-like [Source:RGD Symbol;Acc:2323544]	0.77	0	#NAME?	0.00085	0.243504	yes	DOWN	N	N	Y	Y	Y	0.79	0
ENSRNOG00000011460.L01	292947	RGD1309903	similar to mKIAA1244 protein [Source:RGD Symbol;Acc:1309903]	2.74	0.342	-3	0.0009	0.243504	yes	DOWN	N	N	Y	Y	Y	2.82	0.33
ENSRNOG00000015222.L01	310721	Fam46c	family with sequence similarity 46, member C [Source:RGD Symbol;Acc:1359446]	34.5	8.26	-2.06	0.001	0.243504	yes	DOWN	N	N	Y	Y	Y	35.55	8.02
ENSRNOG00000009438	299270	Serpina6	serpin peptidase inhibitor, clade A (alpha-1 antiproteinase, antitrypsin), member 6 [Source:RGD Symbol;Acc:1595901]	0.894	0	#NAME?	0.00115	0.243504	yes	DOWN	N	N	Y	Y	Y	0.92	0
ENSRNOG00000018485.L01	311730	Gpr155	G protein-coupled receptor 155 [Source:RGD Symbol;Acc:1309162]	41.5	8.94	-2.22	0.00125	0.243504	yes	DOWN	N	N	Y	Y	Y	42.81	8.68
ENSRNOG00000013973.L01	170496	Lcn2	lipocalin 2 [Source:RGD Symbol;Acc:69408]	68.9	12.9	-2.42	0.00135	0.243504	yes	DOWN	N	N	Y	Y	Y	71.1	12.52
ENSRNOG00000007839.L01	29735	Slc16a7	solute carrier family 16 (monocarboxylate transporter), member 7 [Source:RGD Symbol;Acc:3691]	11	1.4	-2.97	0.00145	0.243504	yes	DOWN	N	N	Y	Y	Y	11.31	1.36
ENSRNOG00000007183	100911252	LOC100360977	TRIMCyp-like [Source:RGD Symbol;Acc:2321083]	111	25.1	-2.14	0.00145	0.243504	yes	DOWN	N	N	Y	Y	Y	114.58	24.38
ENSRNOG00000004795.L01	302328	Pof1b	premature ovarian failure 1B [Source:RGD Symbol;Acc:1560798]	27.1	7.5	-1.86	0.0015	0.243504	yes	DOWN	N	N	Y	Y	Y	27.98	7.29
ENSRNOG00000026244.L01	292755	Nccrp1	non-specific cytotoxic cell receptor protein 1 homolog (zebrafish) [Source:RGD Symbol;Acc:1305932]	13.6	1.76	-2.95	0.0019	0.251207	yes	DOWN	N	N	Y	Y	Y	14.02	1.7
ENSRNOG00000010085.L01	290485	Cldn10	claudin 10 [Source:RGD Symbol;Acc:1308027]	60.8	16.1	-1.92	0.0023	0.287262	yes	DOWN	N	N	Y	Y	Y	62.71	15.62
ENSRNOG00000017933.L02	498795	Ccdc3	coiled-coil domain containing 3 [Source:RGD Symbol;Acc:1559473]	15.2	2.86	-2.41	0.0025	0.308479	yes	DOWN	N	N	Y	Y	Y	15.66	2.78
ENSRNOG00000020380.L01	29518	Lgals7	lectin, galactoside-binding, soluble, 7 [Source:RGD Symbol;Acc:61951]	231	64	-1.85	0.00255	0.310903	yes	DOWN	N	N	Y	Y	Y	238.29	62.06
ENSRNOG00000016632.L01	291752	Dsg3	desmoglein 3 [Source:RGD Symbol;Acc:1592103]	26.9	7.28	-1.88	0.0027	0.319677	yes	DOWN	N	N	Y	Y	Y	27.72	7.07
ENSRNOG00000009345	50555	Ugt8	UDP glycosyltransferase 8 [Source:RGD Symbol;Acc:3938]	10	2.08	-2.27	0.00285	0.329811	yes	DOWN	N	N	Y	Y	Y	10.33	2.02
ENSRNOG00000017547.L01	114492	Ccl28	chemokine (C-C motif) ligand 28 [Source:RGD Symbol;Acc:619937]	28.9	6.38	-2.18	0.00295	0.335694	yes	DOWN	N	N	Y	Y	Y	29.81	6.19
ENSRNOG00000002414.L01	304741	Tfcp2l1	transcription factor CP2-like 1 [Source:RGD Symbol;Acc:1305456]	7.41	2.11	-1.82	0.00295	0.335694	yes	DOWN	N	N	Y	Y	Y	7.64	2.04
ENSRNOG00000013304	29221	Arg1	arginase 1 [Source:RGD Symbol;Acc:2150]	76.8	22.5	-1.77	0.0032	0.358173	yes	DOWN	N	N	Y	Y	Y	79.21	21.8
ENSRNOG00000025332.L01	363104	Cd109	CD109 molecule [Source:RGD Symbol;Acc:1311287]	7.55	1.47	-2.36	0.00335	0.368914	yes	DOWN	N	N	Y	Y	Y	7.78	1.43
ENSRNOG00000008422.L01	287610	Lpo	lactoperoxidase [Source:RGD Symbol;Acc:1310051]	203	38.9	-2.39	0.00355	0.378722	yes	DOWN	N	N	Y	Y	Y	209.67	37.72
ENSRNOG00000006367.L01	500820	Slc5a8	solute carrier family 5 (sodium/monocarboxylate cotransporter), member 8 [Source:RGD Symbol;Acc:1564146]	5.63	1.2	-2.23	0.0036	0.382066	yes	DOWN	N	N	Y	Y	Y	5.81	1.16
ENSRNOG00000002640.L01	116589	Serpinb5	serpin peptidase inhibitor, clade B (ovalbumin), member 5 [Source:RGD Symbol;Acc:69342]	33.7	10.4	-1.7	0.00365	0.385376	yes	DOWN	N	N	Y	Y	Y	34.79	10.11
ENSRNOG00000003781.L01	303056	Atp10b	ATPase, class V, type 10B [Source:RGD Symbol;Acc:1565126]	5.09	0.737	-2.79	0.0037	0.388652	yes	DOWN	N	N	Y	Y	Y	5.24	0.72
ENSRNOG00000006642.L01	363476	Yipf6	Yip1 domain family, member 6 [Source:RGD Symbol;Acc:1566154]	30.5	9.21	-1.73	0.00385	0.400302	yes	DOWN	N	N	Y	Y	Y	31.45	8.95
ENSRNOG00000000800.L01	294410	Man1a1	mannosidase, alpha, class 1A, member 1 [Source:RGD Symbol;Acc:1310891]	29.9	8.86	-1.76	0.00465	0.464614	yes	DOWN	N	N	Y	Y	Y	30.87	8.6
ENSRNOG00000003468.L01	170808	Capn8	calpain 8 [Source:RGD Symbol;Acc:620085]	7.13	1.02	-2.8	0.00475	0.467761	yes	DOWN	N	N	Y	Y	Y	7.35	0.99
ENSRNOG00000002227.L01	64030	Kit	v-kit Hardy-Zuckerman 4 feline sarcoma viral oncogene homolog [Source:RGD Symbol;Acc:620568]	16.1	5.24	-1.62	0.005	0.480822	yes	DOWN	N	N	Y	Y	Y	16.63	5.09
ENSRNOG00000001162	116592	Tff2	trefoil factor 2 [Source:RGD Symbol;Acc:620709]	889	206	-2.11	0.0053	0.489616	yes	DOWN	N	N	Y	Y	Y	916.91	200.22
ENSRNOG00000025164	25334	Bhlha15	basic helix-loop-helix family, member a15 [Source:RGD Symbol;Acc:3091]	27.9	8.58	-1.7	0.0054	0.489616	yes	DOWN	N	N	Y	Y	Y	28.76	8.32
ENSRNOG00000029964.L01	289546	Tmprss11g	transmembrane protease, serine 11G [Source:RGD Symbol;Acc:1306446]	26.5	8.54	-1.64	0.0054	0.489616	yes	DOWN	N	N	Y	Y	Y	27.34	8.29
ENSRNOG00000039969.L01	291760	Dsc2	desmocollin 2 [Source:RGD Symbol;Acc:1309426]	45.1	13.8	-1.71	0.00555	0.492295	yes	DOWN	N	N	Y	Y	Y	46.48	13.42
ENSRNOG00000011160.L01	117556	Sv2b	synaptic vesicle glycoprotein 2b [Source:RGD Symbol;Acc:619716]	3.42	0.346	-3.3	0.00595	0.507808	yes	DOWN	N	N	Y	Y	Y	3.52	0.34
ENSRNOG00000027847.L01	100363350	Nxpe2	neurexophilin and PC-esterase domain family, member 2 [Source:RGD Symbol;Acc:2323193]	30.4	3.88	-2.97	0.00595	0.507808	yes	DOWN	N	N	Y	Y	Y	31.29	3.77
ENSRNOG00000009514.L01	24590	Mme	membrane metallo-endopeptidase [Source:RGD Symbol;Acc:3098]	22	5.5	-2	0.006	0.50995	yes	DOWN	N	N	Y	Y	Y	22.66	5.34
ENSRNOG00000002460.L01	60325	Serpinb2	serpin peptidase inhibitor, clade B (ovalbumin), member 2 [Source:RGD Symbol;Acc:621823]	33.5	10.7	-1.65	0.0063	0.528594	yes	DOWN	N	N	Y	Y	Y	34.51	10.35
ENSRNOG00000013213	316539	Epha4	Eph receptor A4 [Source:RGD Symbol;Acc:1560587]	6.3	1.8	-1.81	0.0064	0.528594	yes	DOWN	N	N	Y	Y	Y	6.5	1.75
ENSRNOG00000037436.L01	314539	Macc1	metastasis associated in colon cancer 1 [Source:RGD Symbol;Acc:1309838]	4.61	0.999	-2.21	0.00645	0.530436	yes	DOWN	N	N	Y	Y	Y	4.76	0.97
ENSRNOG00000025994.L01	315318	Krt80	keratin 80 [Source:RGD Symbol;Acc:1359177]	42.7	13.4	-1.67	0.0065	0.530436	yes	DOWN	N	N	Y	Y	Y	44.07	13.02
ENSRNOG00000032959	171178	Adh7	alcohol dehydrogenase 7 (class IV), mu or sigma polypeptide [Source:RGD Symbol;Acc:621638]	96.3	29.8	-1.69	0.0069	0.552081	yes	DOWN	N	N	Y	Y	Y	99.28	28.95
ENSRNOG00000007804.L01	65044	C1galt1	core 1 synthase, glycoprotein-N-acetylgalactosamine 3-beta-galactosyltransferase, 1 [Source:RGD Symbol;Acc:621105]	46.3	14.2	-1.7	0.00715	0.561124	yes	DOWN	N	N	Y	Y	Y	47.74	13.81
ENSRNOG00000018574.L01	681023	Qsox2	quiescin Q6 sulfhydryl oxidase 2 [Source:RGD Symbol;Acc:1584720]	8.18	2.25	-1.86	0.0075	0.579708	yes	DOWN	N	N	Y	Y	Y	8.43	2.18
ENSRNOG00000013057.L01	308761	Prc1	protein regulator of cytokinesis 1 [Source:RGD Symbol;Acc:1311754]	8.99	2.02	-2.15	0.0076	0.583037	yes	DOWN	N	N	Y	Y	Y	9.27	1.96
ENSRNOG00000024909	315324	Krt78	keratin 78 [Source:RGD Symbol;Acc:1591341]	6.42	1.14	-2.49	0.00785	0.589439	yes	DOWN	N	N	Y	Y	Y	6.63	1.11
ENSRNOG00000023272	362720	Rrm2	ribonucleotide reductase M2 [Source:RGD Symbol;Acc:1598310]	9.89	0.71	-3.8	0.008	0.589439	yes	DOWN	N	N	Y	Y	Y	10.2	0.69
ENSRNOG00000004626.L01	84395	Slc34a2	solute carrier family 34 (type II sodium/phosphate contransporter), member 2 [Source:RGD Symbol;Acc:620889]	5.97	1.32	-2.18	0.00825	0.601369	yes	DOWN	N	N	Y	Y	Y	6.16	1.28
ENSRNOG00000016695.L01	81686	Mmp2	matrix metallopeptidase 2 [Source:RGD Symbol;Acc:621316]	84	26.9	-1.65	0.00845	0.604075	yes	DOWN	N	N	Y	Y	Y	86.67	26.07
ENSRNOG00000020382.L01	100912863	Ltb4r2	leukotriene B4 receptor 2 [Source:RGD Symbol;Acc:621029]	4.54	0.663	-2.78	0.0085	0.604075	yes	DOWN	N	N	Y	Y	Y	4.69	0.64
ENSRNOG00000019297.L01	29547	Homer2	homer homolog 2 (Drosophila) [Source:RGD Symbol;Acc:620705]	20.5	4.55	-2.17	0.0086	0.604075	yes	DOWN	N	N	Y	Y	Y	21.18	4.41
ENSRNOG00000038916.L01	679937	Dram1	DNA-damage regulated autophagy modulator 1 [Source:RGD Symbol;Acc:1598133]	12.1	3.28	-1.88	0.00875	0.604075	yes	DOWN	N	N	Y	Y	Y	12.44	3.18
ENSRNOG00000016926.L01	499377	Plekhs1	pleckstrin homology domain containing, family S member 1 [Source:RGD Symbol;Acc:1559884]	7.35	2.23	-1.72	0.0089	0.604075	yes	DOWN	N	N	Y	Y	Y	7.58	2.16
ENSRNOG00000027089.L01	309918	Ell2	elongation factor RNA polymerase II 2 [Source:RGD Symbol;Acc:1309296]	27.9	8.21	-1.76	0.00895	0.604075	yes	DOWN	N	N	Y	Y	Y	28.76	7.97
ENSRNOG00000039906.L01	65270	Gbgt1	globoside alpha-1,3-N-acetylgalactosaminyltransferase 1 [Source:RGD Symbol;Acc:628609]	18.8	4.96	-1.92	0.009	0.604075	yes	DOWN	N	N	Y	Y	Y	19.37	4.82
ENSRNOG00000009629.L01	54231	Car2	carbonic anhydrase 2 [Source:RGD Symbol;Acc:2240]	43.3	13.1	-1.73	0.0091	0.604075	yes	DOWN	N	N	Y	Y	Y	44.68	12.68
ENSRNOG00000001514	311742	Cdca7	cell division cycle associated 7 [Source:RGD Symbol;Acc:1309363]	22.4	7.28	-1.62	0.00975	0.604075	yes	DOWN	N	N	Y	Y	Y	23.09	7.07
ENSRNOG00000009339.L01	362044	Cenpe	centromere protein E [Source:RGD Symbol;Acc:1307115]	1.35	0.2	-2.75	0.00985	0.604075	yes	DOWN	N	N	Y	Y	Y	1.39	0.19
ENSRNOG00000021274.L01	296179	Fermt1	fermitin family member 1 [Source:RGD Symbol;Acc:1306816]	9.57	3.16	-1.6	0.00995	0.604075	yes	DOWN	N	N	Y	Y	Y	9.87	3.07
ENSRNOG00000007030.L01	171287	Epha7	Eph receptor A7 [Source:RGD Symbol;Acc:70957]	8.51	2.7	-1.66	0.0102	0.604075	yes	DOWN	N	N	N	Y	Y	8.78	2.62
ENSRNOG00000014872.L01	310843	Sec24d	SEC24 family member D [Source:RGD Symbol;Acc:1311720]	21.6	7.11	-1.61	0.01055	0.604075	yes	DOWN	N	N	N	Y	Y	22.3	6.9
ENSRNOG00000018929.L01	309523	Kif20b	kinesin family member 20B [Source:RGD Symbol;Acc:1308497]	1.66	0.357	-2.22	0.01085	0.604075	yes	DOWN	N	N	N	Y	Y	1.71	0.35
ENSRNOG00000008450	100359539	LOC100359539	ribonucleotide reductase M2 polypeptide [Source:RGD Symbol;Acc:2323655]	5.66	1.2	-2.24	0.01115	0.604075	yes	DOWN	N	N	N	Y	Y	5.84	1.16
ENSRNOG00000009334	311325	Knstrn	kinetochore-localized astrin/SPAG5 binding protein [Source:RGD Symbol;Acc:1303240]	5.15	0.473	-3.45	0.01155	0.604075	yes	DOWN	N	N	N	Y	Y	5.32	0.46
ENSRNOG00000043342	290595	LOC290595	hypothetical gene supported by AF152002 [Source:RGD Symbol;Acc:1566160]	54.9	16.9	-1.7	0.01245	0.604075	yes	DOWN	N	N	N	Y	Y	56.57	16.42
ENSRNOG00000006867.L01	362733	Etv1	ets variant 1 [Source:RGD Symbol;Acc:1312007]	45.2	14.1	-1.69	0.01285	0.604075	yes	DOWN	N	N	N	Y	Y	46.62	13.66
ENSRNOG00000018276.L01	499166	Mgat4a	mannosyl (alpha-1,3-)-glycoprotein beta-1,4-N-acetylglucosaminyltransferase, isozyme A [Source:RGD Symbol;Acc:1305650]	14.7	5.36	-1.46	0.01315	0.604075	yes	DOWN	N	N	N	Y	Y	15.2	5.21
ENSRNOG00000000321	25145	Cd24	CD24 molecule [Source:RGD Symbol;Acc:2298]	264	69.1	-1.93	0.0132	0.604075	yes	DOWN	N	N	N	Y	Y	272.06	67.08
ENSRNOG00000036877.L01	499721	Clca4l	chloride channel calcium activated 4-like [Source:RGD Symbol;Acc:1591945]	5.65	0.65	-3.12	0.01335	0.604075	yes	DOWN	N	N	N	Y	Y	5.83	0.63
ENSRNOG00000020578.L01	81613	Ceacam1	carcinoembryonic antigen-related cell adhesion molecule 1 (biliary glycoprotein) [Source:RGD Symbol;Acc:67396]	20.8	7.36	-1.5	0.0134	0.604075	yes	DOWN	N	N	N	Y	Y	21.46	7.15
ENSRNOG00000003120.L01	84400	Prelp	proline/arginine-rich end leucine-rich repeat protein [Source:RGD Symbol;Acc:620226]	28.8	9.68	-1.57	0.01355	0.604075	yes	DOWN	N	N	N	Y	Y	29.75	9.4
ENSRNOG00000013028.L01	266603	Aldh1a3	aldehyde dehydrogenase 1 family, member A3 [Source:RGD Symbol;Acc:628662]	13.6	4.58	-1.57	0.0136	0.604075	yes	DOWN	N	N	N	Y	Y	14.02	4.44
ENSRNOG00000017140.L01	689949	Zfp185	zinc finger protein 185 [Source:RGD Symbol;Acc:1586351]	14.9	5.52	-1.44	0.01385	0.604075	yes	DOWN	N	N	N	Y	Y	15.41	5.36
ENSRNOG00000003038.L01	360868	Sft2d2	SFT2 domain containing 2 [Source:RGD Symbol;Acc:1310623]	49.3	15.1	-1.71	0.0139	0.604075	yes	DOWN	N	N	N	Y	Y	50.86	14.66
ENSRNOG00000002609.L01	364755	Ero1lb	ERO1-like beta (S. cerevisiae) [Source:RGD Symbol;Acc:1563548]	15.9	3.67	-2.11	0.01435	0.604075	yes	DOWN	N	N	N	Y	Y	16.35	3.56
ENSRNOG00000000924.L01	25648	Slc7a1	solute carrier family 7 (cationic amino acid transporter, y+ system), member 1 [Source:RGD Symbol;Acc:3716]	8.82	3.1	-1.51	0.0145	0.604075	yes	DOWN	N	N	N	Y	Y	9.09	3.01
ENSRNOG00000024365.L01	361921	Ect2	epithelial cell transforming 2 [Source:RGD Symbol;Acc:1308524]	4.03	0.566	-2.83	0.0147	0.604075	yes	DOWN	N	N	N	Y	Y	4.15	0.55
ENSRNOG00000046428.L01	100365744	Lrrc75b	leucine rich repeat containing 75B [Source:RGD Symbol;Acc:2318441]	8.56	2.6	-1.72	0.0148	0.604075	yes	DOWN	N	N	N	Y	Y	8.83	2.52
ENSRNOG00000013808.L01	291952	Ces2g	carboxylesterase 2G [Source:RGD Symbol;Acc:1308358]	16.3	5.28	-1.63	0.01485	0.604075	yes	DOWN	N	N	N	Y	Y	16.85	5.13
ENSRNOG00000008986.L01	290396	Diaph3	diaphanous-related formin 3 [Source:RGD Symbol;Acc:1593287]	2.85	0.643	-2.15	0.01505	0.604075	yes	DOWN	N	N	N	Y	Y	2.94	0.62
ENSRNOG00000007906.L01	171576	Bub1b	BUB1 mitotic checkpoint serine/threonine kinase B [Source:RGD Symbol;Acc:619791]	2.95	0.459	-2.69	0.01525	0.604075	yes	DOWN	N	N	N	Y	Y	3.05	0.45
ENSRNOG00000010917.L01	315824	Bmp5	bone morphogenetic protein 5 [Source:RGD Symbol;Acc:1305979]	4.8	1.19	-2.01	0.0155	0.604075	yes	DOWN	N	N	N	Y	Y	4.95	1.16
ENSRNOG00000017156.L01	361122	Ankle1	ankyrin repeat and LEM domain containing 1 [Source:RGD Symbol;Acc:1308184]	3.12	0.642	-2.28	0.01565	0.604075	yes	DOWN	N	N	N	Y	Y	3.22	0.62
ENSRNOG00000029427.L01	298555	Grhl3	grainyhead-like 3 (Drosophila) [Source:RGD Symbol;Acc:1308320]	11.2	3.59	-1.64	0.0159	0.604075	yes	DOWN	N	N	N	Y	Y	11.53	3.48
ENSRNOG00000030285.L01	29210	Epha3	Eph receptor A3 [Source:RGD Symbol;Acc:68389]	2.78	0.747	-1.9	0.0162	0.604075	yes	DOWN	N	N	N	Y	Y	2.87	0.73
ENSRNOG00000002192.L01	289635	Rell1	RELT-like 1 [Source:RGD Symbol;Acc:1307468]	19.4	6.72	-1.53	0.0163	0.604075	yes	DOWN	N	N	N	Y	Y	19.98	6.52
ENSRNOG00000014080.L01	315740	Kif23	kinesin family member 23 [Source:RGD Symbol;Acc:1308596]	11.8	4.21	-1.49	0.01645	0.604075	yes	DOWN	N	N	N	Y	Y	12.21	4.09
ENSRNOG00000013203	312273	LOC312273	Trypsin V-A [Source:RGD Symbol;Acc:1563848]	0.845	0	#NAME?	0.01665	0.604075	yes	DOWN	N	N	N	Y	Y	0.87	0
ENSRNOG00000019999.L01	60378	Lypd3	Ly6/Plaur domain containing 3 [Source:RGD Symbol;Acc:69053]	79.3	29.8	-1.41	0.01675	0.604075	yes	DOWN	N	N	N	Y	Y	81.78	28.93
ENSRNOG00000000543.L01	79209	Frk	fyn-related Src family tyrosine kinase [Source:RGD Symbol;Acc:621423]	8.67	3.05	-1.51	0.0168	0.604075	yes	DOWN	N	N	N	Y	Y	8.93	2.96
ENSRNOG00000050534.L01	64043	Gcnt1	glucosaminyl (N-acetyl) transferase 1, core 2 [Source:RGD Symbol;Acc:621370]	9.46	3.34	-1.5	0.0169	0.604075	yes	DOWN	N	N	N	Y	Y	9.76	3.24
ENSRNOG00000049410.L01	24260	Chrm3	cholinergic receptor, muscarinic 3 [Source:RGD Symbol;Acc:2343]	7.8	1.83	-2.09	0.017	0.604075	yes	DOWN	N	N	N	Y	Y	8.04	1.77
ENSRNOG00000008816.L01	113955	Gpnmb	glycoprotein (transmembrane) nmb [Source:RGD Symbol;Acc:71008]	27	10	-1.43	0.0171	0.604075	yes	DOWN	N	N	N	Y	Y	27.84	9.74
ENSRNOG00000014492	24864	Pgc	progastricsin (pepsinogen C) [Source:RGD Symbol;Acc:3943]	9.45	1.75	-2.43	0.01745	0.604786	yes	DOWN	N	N	N	Y	Y	9.74	1.7
ENSRNOG00000008282.L01	100910896	Elf5	E74-like factor 5 [Source:RGD Symbol;Acc:1305859]	38.8	11.9	-1.71	0.0176	0.608954	yes	DOWN	N	N	N	Y	Y	40.02	11.53
ENSRNOG00000018187	100909901	LOC100909901	rac GTPase-activating protein 1-like [Source:RGD Symbol;Acc:6501444]	2.92	0.354	-3.05	0.01775	0.612076	yes	DOWN	N	N	N	Y	Y	3.01	0.34
ENSRNOG00000004921.L01	311336	Nusap1	nucleolar and spindle associated protein 1 [Source:RGD Symbol;Acc:1305764]	4.84	1.13	-2.1	0.0179	0.61312	yes	DOWN	N	N	N	Y	Y	5	1.1
ENSRNOG00000017431.L01	307907	RGD1304884	similar to RIKEN cDNA 6430548M08 [Source:RGD Symbol;Acc:1304884]	32.5	11.3	-1.53	0.01795	0.613806	yes	DOWN	N	N	N	Y	Y	33.53	10.95
ENSRNOG00000029401	25365	Actg2	actin, gamma 2, smooth muscle, enteric [Source:RGD Symbol;Acc:2027]	14	3.29	-2.09	0.01805	0.61415	yes	DOWN	N	N	N	Y	Y	14.42	3.19
ENSRNOG00000011820.L01	56780	Acpp	acid phosphatase, prostate [Source:RGD Symbol;Acc:2023]	26.6	9.82	-1.44	0.01845	0.623616	yes	DOWN	N	N	N	Y	Y	27.39	9.53
ENSRNOG00000024986.L01	500152	Mmrn1	multimerin 1 [Source:RGD Symbol;Acc:1587248]	5.26	1.57	-1.75	0.0185	0.624276	yes	DOWN	N	N	N	Y	Y	5.42	1.52
ENSRNOG00000012660.L01	361945	Postn	periostin, osteoblast specific factor [Source:RGD Symbol;Acc:1305285]	23.5	9.01	-1.38	0.01855	0.624934	yes	DOWN	N	N	N	Y	Y	24.21	8.75
ENSRNOG00000017766.L01	363085	Car12	carbonic anyhydrase 12 [Source:RGD Symbol;Acc:1306612]	30.8	11.7	-1.4	0.01865	0.627271	yes	DOWN	N	N	N	Y	Y	31.73	11.33
ENSRNOG00000000545.L01	25681	Col10a1	collagen, type X, alpha 1 [Source:RGD Symbol;Acc:2371]	14.7	3.03	-2.28	0.01915	0.630746	yes	DOWN	N	N	N	Y	Y	15.18	2.94
ENSRNOG00000018113	307056	Anlnl1	anillin, actin binding protein-like 1 [Source:RGD Symbol;Acc:1566097]	2.54	0.319	-3	0.0192	0.630746	yes	DOWN	N	N	N	Y	Y	2.62	0.31
ENSRNOG00000028576.L01	364774	Calml5	calmodulin-like 5 [Source:RGD Symbol;Acc:1310047]	121	32.6	-1.9	0.0194	0.630746	yes	DOWN	N	N	N	Y	Y	125.02	31.61
ENSRNOG00000024190.L01	298138	LOC683719	similar to RAS and EF hand domain containing [Source:RGD Symbol;Acc:1583373]	11.7	4.53	-1.37	0.0195	0.632993	yes	DOWN	N	N	N	Y	Y	12.08	4.4
ENSRNOG00000018507.L01	297417	Gfpt1	glutamine fructose-6-phosphate transaminase 1 [Source:RGD Symbol;Acc:1549703]	70.4	23.4	-1.59	0.01965	0.634844	yes	DOWN	N	N	N	Y	Y	72.53	22.74
ENSRNOG00000004198.L01	362734	Stxbp6	syntaxin binding protein 6 (amisyn) [Source:RGD Symbol;Acc:1306117]	10.7	3.76	-1.5	0.01965	0.634844	yes	DOWN	N	N	N	Y	Y	11	3.65
ENSRNOG00000001928.L01	25466	Il1rap	interleukin 1 receptor accessory protein [Source:RGD Symbol;Acc:2893]	13.6	4.66	-1.55	0.0198	0.637678	yes	DOWN	N	N	N	Y	Y	14.04	4.52
ENSRNOG00000027736.L01	65204	Cnn1	calponin 1, basic, smooth muscle [Source:RGD Symbol;Acc:621883]	14	3.84	-1.87	0.0198	0.637678	yes	DOWN	N	N	N	Y	Y	14.46	3.73
ENSRNOG00000002417.L01	266775	Serpinb10	serpin peptidase inhibitor, clade B (ovalbumin), member 10 [Source:RGD Symbol;Acc:628853]	52.6	20.2	-1.38	0.0201	0.640889	yes	DOWN	N	N	N	Y	Y	54.23	19.65
ENSRNOG00000010023	64018	Slc33a1	solute carrier family 33 (acetyl-CoA transporter), member 1 [Source:RGD Symbol;Acc:620653]	28	10.6	-1.4	0.02025	0.643071	yes	DOWN	N	N	N	Y	Y	28.83	10.31
ENSRNOG00000004234	94273	Mgat2	mannosyl (alpha-1,6-)-glycoprotein beta-1,2-N-acetylglucosaminyltransferase [Source:RGD Symbol;Acc:620098]	27.2	10.4	-1.39	0.0203	0.643661	yes	DOWN	N	N	N	Y	Y	28	10.07
ENSRNOG00000005023.L01	298961	Agr2	anterior gradient 2 [Source:RGD Symbol;Acc:1304606]	460	154	-1.58	0.0205	0.64501	yes	DOWN	N	N	N	Y	Y	474.26	149.13
ENSRNOG00000006803	295690	Dnajc10	DnaJ (Hsp40) homolog, subfamily C, member 10 [Source:RGD Symbol;Acc:1307813]	78.2	27.3	-1.52	0.0207	0.649308	yes	DOWN	N	N	N	Y	Y	80.66	26.51
ENSRNOG00000013912.L01	310801	Slc30a7	solute carrier family 30 (zinc transporter), member 7 [Source:RGD Symbol;Acc:1307873]	20.1	6.51	-1.63	0.02095	0.653149	yes	DOWN	N	N	N	Y	Y	20.74	6.32
ENSRNOG00000016343.L01	171548	Dkk3	dickkopf WNT signaling pathway inhibitor 3 [Source:RGD Symbol;Acc:621846]	18.7	7.18	-1.38	0.0212	0.654962	yes	DOWN	N	N	N	Y	Y	19.3	6.97
ENSRNOG00000014511	245960	Alg10	ALG10, alpha-1,2-glucosyltransferase [Source:RGD Symbol;Acc:708500]	11.5	3.22	-1.84	0.02135	0.656625	yes	DOWN	N	N	N	Y	Y	11.9	3.13
ENSRNOG00000025115.L01	315663	Exph5	exophilin 5 [Source:RGD Symbol;Acc:1560308]	8.97	3.47	-1.37	0.0215	0.659258	yes	DOWN	N	N	N	Y	Y	9.25	3.37
ENSRNOG00000003614.L01	65271	Mgat5	mannosyl (alpha-1,6-)-glycoprotein beta-1,6-N-acetyl-glucosaminyltransferase [Source:RGD Symbol;Acc:620100]	9.23	2.83	-1.71	0.02165	0.661876	yes	DOWN	N	N	N	Y	Y	9.52	2.74
ENSRNOG00000002031.L01	289482	Naa11	N(alpha)-acetyltransferase 11, NatA catalytic subunit [Source:RGD Symbol;Acc:1564723]	2.05	0.243	-3.08	0.02185	0.663576	yes	DOWN	N	N	N	Y	Y	2.11	0.24
ENSRNOG00000004821.L01	299940	Sntb1	syntrophin, beta 1 [Source:RGD Symbol;Acc:1307728]	16.3	6.35	-1.36	0.02185	0.663576	yes	DOWN	N	N	N	Y	Y	16.86	6.17
ENSRNOG00000015898.L01	301737	Fer	fer (fps/fes related) tyrosine kinase [Source:RGD Symbol;Acc:1306273]	3.93	1.39	-1.5	0.022	0.663745	yes	DOWN	N	N	N	Y	Y	4.06	1.35
ENSRNOG00000011316.L01	498533	Fam167a	family with sequence similarity 167, member A [Source:RGD Symbol;Acc:1561302]	11	4.04	-1.44	0.02205	0.663745	yes	DOWN	N	N	N	Y	Y	11.34	3.93
ENSRNOG00000047969.L01	353251	Prss21	protease, serine, 21 [Source:RGD Symbol;Acc:727870]	3.29	0.551	-2.58	0.02235	0.668314	yes	DOWN	N	N	N	Y	Y	3.39	0.53
ENSRNOG00000016397.L01	300682	Tmprss13	transmembrane protease, serine 13 [Source:RGD Symbol;Acc:1310872]	9.66	3.12	-1.63	0.0224	0.668833	yes	DOWN	N	N	N	Y	Y	9.96	3.03
ENSRNOG00000018764.L01	290638	B3gnt3	UDP-GlcNAc:betaGal beta-1,3-N-acetylglucosaminyltransferase 3 [Source:RGD Symbol;Acc:1305151]	9.02	2.38	-1.92	0.0226	0.672843	yes	DOWN	N	N	N	Y	Y	9.3	2.31
ENSRNOG00000015957	60327	F13a1	coagulation factor XIII, A1 polypeptide [Source:RGD Symbol;Acc:621495]	4.43	1.3	-1.76	0.0229	0.677833	yes	DOWN	N	N	N	Y	Y	4.56	1.26
ENSRNOG00000027894.L01	310621	Iqgap3	IQ motif containing GTPase activating protein 3 [Source:RGD Symbol;Acc:1305951]	2.64	0.634	-2.06	0.02325	0.684189	yes	DOWN	N	N	N	Y	Y	2.72	0.62
ENSRNOG00000019184.L01	25339	Npr3	natriuretic peptide receptor 3 [Source:RGD Symbol;Acc:3196]	6.26	2.26	-1.47	0.02355	0.684189	yes	DOWN	N	N	N	Y	Y	6.46	2.2
ENSRNOG00000010555.L01	290356	LOC102551958	phytanoyl-CoA hydroxylase-interacting protein-like [Source:RGD Symbol;Acc:7719585]	22.7	9.14	-1.31	0.0236	0.684189	yes	DOWN	N	N	N	Y	Y	23.37	8.87
ENSRNOG00000007892.L01	312903	Tram1	translocation associated membrane protein 1 [Source:RGD Symbol;Acc:1359100]	109	39.1	-1.48	0.0237	0.684189	yes	DOWN	N	N	N	Y	Y	112.76	37.97
ENSRNOG00000010866.L01	361972	Tmem154	transmembrane protein 154 [Source:RGD Symbol;Acc:1563262]	18.2	5.55	-1.71	0.02425	0.685073	yes	DOWN	N	N	N	Y	Y	18.74	5.39
ENSRNOG00000011763.L01	80881	Serp1	stress-associated endoplasmic reticulum protein 1 [Source:RGD Symbol;Acc:620790]	158	45.8	-1.79	0.02455	0.685073	yes	DOWN	N	N	N	Y	Y	162.8	44.44
ENSRNOG00000012494.L01	308836	Kctd14	potassium channel tetramerization domain containing 14 [Source:RGD Symbol;Acc:1306430]	34.5	12.5	-1.47	0.02455	0.685073	yes	DOWN	N	N	N	Y	Y	35.62	12.12
ENSRNOG00000012535	501106	Gpr115	G protein-coupled receptor 115 [Source:RGD Symbol;Acc:1565216]	4.31	1.1	-1.97	0.0249	0.687368	yes	DOWN	N	N	N	Y	Y	4.44	1.07
ENSRNOG00000050806.L01	100365259	Spty2d1	SPT2, Suppressor of Ty, domain containing 1 (S. cerevisiae) [Source:RGD Symbol;Acc:2319415]	13.1	4.67	-1.49	0.025	0.688251	yes	DOWN	N	N	N	Y	Y	13.55	4.54
ENSRNOG00000002408.L01	305340	Rbm47	RNA binding motif protein 47 [Source:RGD Symbol;Acc:1359713]	22.8	9.17	-1.31	0.02505	0.688251	yes	DOWN	N	N	N	Y	Y	23.5	8.91
ENSRNOG00000010630.L01	293118	Prcp	prolylcarboxypeptidase (angiotensinase C) [Source:RGD Symbol;Acc:1307842]	12	4.21	-1.51	0.0251	0.688251	yes	DOWN	N	N	N	Y	Y	12.35	4.09
ENSRNOG00000015948	292657	Slc1a5	solute carrier family 1 (neutral amino acid transporter), member 5 [Source:RGD Symbol;Acc:708512]	25.9	10.4	-1.31	0.0252	0.689148	yes	DOWN	N	N	N	Y	Y	26.71	10.1
ENSRNOG00000009399.L01	295714	RGD1311224	similar to fatty acid desaturase 2; linoleoyl-CoA desaturase (delta-6-desaturase)-like 2; delta-6 fatty acid desaturase [Source:RGD Symbol;Acc:1311224]	15.7	5.36	-1.55	0.02545	0.692287	yes	DOWN	N	N	N	Y	Y	16.14	5.2
ENSRNOG00000019939.L01	64033	Ccnd2	cyclin D2 [Source:RGD Symbol;Acc:621083]	73.7	25.7	-1.52	0.02565	0.696314	yes	DOWN	N	N	N	Y	Y	75.98	24.96
ENSRNOG00000017713.L01	364719	Prss16	protease, serine, 16 (thymus) [Source:RGD Symbol;Acc:1306652]	2.07	0.631	-1.72	0.0257	0.696314	yes	DOWN	N	N	N	Y	Y	2.14	0.61
ENSRNOG00000016122	25675	Hmgcr	3-hydroxy-3-methylglutaryl-CoA reductase [Source:RGD Symbol;Acc:2803]	20.5	8.17	-1.33	0.0262	0.701334	yes	DOWN	N	N	N	Y	Y	21.19	7.93
ENSRNOG00000021134.L01	689830	Anxa9	annexin A9 [Source:RGD Symbol;Acc:1587550]	9.44	2.58	-1.87	0.02635	0.701334	yes	DOWN	N	N	N	Y	Y	9.73	2.51
ENSRNOG00000000632.L01	54237	Cdk1	cyclin-dependent kinase 1 [Source:RGD Symbol;Acc:2319]	10.7	2.64	-2.02	0.0265	0.701334	yes	DOWN	N	N	N	Y	Y	11.01	2.56
ENSRNOG00000006170.L01	313125	Bach2	BTB and CNC homology 1, basic leucine zipper transcription factor 2 [Source:RGD Symbol;Acc:1562865]	3.02	0.979	-1.63	0.02655	0.701334	yes	DOWN	N	N	N	Y	Y	3.11	0.95
ENSRNOG00000029055.L01	315852	Ttk	Ttk protein kinase [Source:RGD Symbol;Acc:1305558]	1.69	0.28	-2.59	0.02655	0.701334	yes	DOWN	N	N	N	Y	Y	1.74	0.27
ENSRNOG00000013452.L01	362182	Rcn1	reticulocalbin 1, EF-hand calcium binding domain [Source:RGD Symbol;Acc:1311292]	106	38.2	-1.48	0.02675	0.701334	yes	DOWN	N	N	N	Y	Y	109.86	37.08
ENSRNOG00000008305.L01	114100	Sc5d	sterol-C5-desaturase [Source:RGD Symbol;Acc:620775]	20.6	7.72	-1.42	0.02685	0.701334	yes	DOWN	N	N	N	Y	Y	21.23	7.5
ENSRNOG00000007234	25427	Cyp51	cytochrome P450, family 51 [Source:RGD Symbol;Acc:2481]	22.8	9.02	-1.34	0.0272	0.701334	yes	DOWN	N	N	N	Y	Y	23.55	8.76
ENSRNOG00000017550.L01	296145	Fbln7	fibulin 7 [Source:RGD Symbol;Acc:1310131]	3.96	1.19	-1.74	0.02725	0.701334	yes	DOWN	N	N	N	Y	Y	4.09	1.15
ENSRNOG00000031599	501869	Sh2d1b	SH2 domain containing 1B [Source:RGD Symbol;Acc:1563935]	1.87	0	#NAME?	0.0274	0.701334	yes	DOWN	N	N	N	Y	Y	1.93	0
ENSRNOG00000013443.L01	309475	Tm9sf3	transmembrane 9 superfamily member 3 [Source:RGD Symbol;Acc:1564625]	142	40.1	-1.82	0.02745	0.701334	yes	DOWN	N	N	N	Y	Y	146.54	38.98
ENSRNOG00000014960.L01	64557	Bard1	BRCA1 associated RING domain 1 [Source:RGD Symbol;Acc:621072]	1.57	0.285	-2.46	0.0275	0.701334	yes	DOWN	N	N	N	Y	Y	1.61	0.28
ENSRNOG00000012318.L01	289054	Aspm	asp (abnormal spindle) homolog, microcephaly associated (Drosophila) [Source:RGD Symbol;Acc:1307111]	2.95	1.02	-1.53	0.0276	0.701334	yes	DOWN	N	N	N	Y	Y	3.04	0.99
ENSRNOG00000021011.L01	58924	Fut2	fucosyltransferase 2 (secretor status included) [Source:RGD Symbol;Acc:2639]	28.4	11.6	-1.29	0.02765	0.701334	yes	DOWN	N	N	N	Y	Y	29.28	11.27
ENSRNOG00000010516.L01	25619	Plau	plasminogen activator, urokinase [Source:RGD Symbol;Acc:3343]	30.5	12.3	-1.31	0.0277	0.701334	yes	DOWN	N	N	N	Y	Y	31.44	11.94
ENSRNOG00000002024.L01	79208	Epha5	EPH receptor A5 [Source:RGD Symbol;Acc:620831]	2.45	0.476	-2.37	0.0278	0.70213	yes	DOWN	N	N	N	Y	Y	2.53	0.46
ENSRNOG00000028358.L01	289085	Edem3	ER degradation enhancer, mannosidase alpha-like 3 [Source:RGD Symbol;Acc:1561496]	16.9	6.9	-1.29	0.0283	0.708547	yes	DOWN	N	N	N	Y	Y	17.39	6.7
ENSRNOG00000019776.L01	81921	Sh3gl3	SH3-domain GRB2-like 3 [Source:RGD Symbol;Acc:620578]	5.22	1.16	-2.17	0.0285	0.709696	yes	DOWN	N	N	N	Y	Y	5.39	1.13
ENSRNOG00000003746.L01	29584	Gjb1	gap junction protein, beta 1 [Source:RGD Symbol;Acc:61926]	20.5	7.09	-1.53	0.02855	0.709696	yes	DOWN	N	N	N	Y	Y	21.09	6.89
ENSRNOG00000015321	294119	Moxd1	monooxygenase, DBH-like 1 [Source:RGD Symbol;Acc:1310033]	5.13	1.37	-1.9	0.0288	0.711011	yes	DOWN	N	N	N	Y	Y	5.29	1.33
ENSRNOG00000023316.L01	313993	Grhl1	grainyhead-like 1 (Drosophila) [Source:RGD Symbol;Acc:1305735]	15.7	6.6	-1.26	0.0289	0.711011	yes	DOWN	N	N	N	Y	Y	16.24	6.4
ENSRNOG00000003705.L01	367786	Bmx	BMX non-receptor tyrosine kinase [Source:RGD Symbol;Acc:1565643]	33.1	10.2	-1.69	0.0294	0.719475	yes	DOWN	N	N	N	Y	Y	34.11	9.95
ENSRNOG00000009330.L01	363103	Slc17a5	solute carrier family 17 (acidic sugar transporter), member 5 [Source:RGD Symbol;Acc:1311388]	9.57	3.33	-1.52	0.02975	0.723716	yes	DOWN	N	N	N	Y	Y	9.87	3.23
ENSRNOG00000022337	290467	Slitrk6	SLIT and NTRK-like family, member 6 [Source:RGD Symbol;Acc:1306550]	17.7	7.12	-1.31	0.02995	0.725995	yes	DOWN	N	N	N	Y	Y	18.22	6.91
ENSRNOG00000016026	363551	RGD1562673	similar to Prostatic spermine-binding protein precursor (SBP) [Source:RGD Symbol;Acc:1562673]	16	3.59	-2.16	0.03025	0.729812	yes	DOWN	N	N	N	Y	Y	16.51	3.48
ENSRNOG00000014617.L01	192152	Tgoln2	trans-golgi network protein 2 [Source:RGD Symbol;Acc:620445]	116	39.4	-1.56	0.03035	0.730504	yes	DOWN	N	N	N	Y	Y	120.1	38.28
ENSRNOG00000004332.L01	24329	Egfr	epidermal growth factor receptor [Source:RGD Symbol;Acc:2543]	8.53	3.61	-1.24	0.03065	0.73256	yes	DOWN	N	N	N	Y	Y	8.79	3.51
ENSRNOG00000014070.L01	287699	Krt13	keratin 13 [Source:RGD Symbol;Acc:1302937]	394	114	-1.79	0.0308	0.734431	yes	DOWN	N	N	N	Y	Y	406.31	110.71
ENSRNOG00000012149.L01	362021	Gpsm2	G-protein signaling modulator 2 [Source:RGD Symbol;Acc:1560967]	7.99	2.8	-1.51	0.0308	0.734431	yes	DOWN	N	N	N	Y	Y	8.24	2.72
ENSRNOG00000025603.L01	301269	Gpr111	G protein-coupled receptor 111 [Source:RGD Symbol;Acc:1306718]	1.91	0.444	-2.1	0.03085	0.734768	yes	DOWN	N	N	N	Y	Y	1.97	0.43
ENSRNOG00000002487.L01	302492	Mbnl3	muscleblind-like splicing regulator 3 [Source:RGD Symbol;Acc:1565834]	6.87	2.84	-1.27	0.03095	0.735774	yes	DOWN	N	N	N	Y	Y	7.08	2.76
ENSRNOG00000013388.L01	316400	Pgap1	post-GPI attachment to proteins 1 [Source:RGD Symbol;Acc:1303213]	3.44	1.36	-1.34	0.03135	0.741504	yes	DOWN	N	N	N	Y	Y	3.55	1.32
ENSRNOG00000002209.L01	305367	Arap2	ArfGAP with RhoGAP domain, ankyrin repeat and PH domain 2 [Source:RGD Symbol;Acc:1306452]	10.6	4.42	-1.26	0.0314	0.74183	yes	DOWN	N	N	N	Y	Y	10.92	4.29
ENSRNOG00000012197.L01	296290	Bpifb2	BPI fold containing family B, member 2 [Source:RGD Symbol;Acc:1310866]	848	138	-2.62	0.03165	0.746015	yes	DOWN	N	N	N	Y	Y	874.7	133.9
ENSRNOG00000033059.L01	100361647	Galnt6	polypeptide N-acetylgalactosaminyltransferase 6 [Source:RGD Symbol;Acc:2319726]	41.3	16.8	-1.3	0.0318	0.748689	yes	DOWN	N	N	N	Y	Y	42.59	16.32
ENSRNOG00000038068.L01	306091	Pcdh9	protocadherin 9 [Source:RGD Symbol;Acc:1306348]	2.52	0.599	-2.07	0.03185	0.749005	yes	DOWN	N	N	N	Y	Y	2.6	0.58
ENSRNOG00000027430.L01	301476	Ikzf2	IKAROS family zinc finger 2 [Source:RGD Symbol;Acc:1308686]	16.5	6.97	-1.24	0.032	0.749407	yes	DOWN	N	N	N	Y	Y	17.01	6.77
ENSRNOG00000026844.L01	691259	Lypd8	LY6/PLAUR domain containing 8 [Source:RGD Symbol;Acc:1586251]	8.34	0.621	-3.75	0.03205	0.749407	yes	DOWN	N	N	N	Y	Y	8.6	0.6
ENSRNOG00000028404	360616	Ppp1r1b	protein phosphatase 1, regulatory (inhibitor) subunit 1B [Source:RGD Symbol;Acc:621859]	50.7	21.4	-1.24	0.0326	0.757081	yes	DOWN	N	N	N	Y	Y	52.3	20.8
ENSRNOG00000015059.L01	246117	Mcfd2	multiple coagulation factor deficiency 2 [Source:RGD Symbol;Acc:628690]	89.6	29.9	-1.58	0.03295	0.760336	yes	DOWN	N	N	N	Y	Y	92.41	29.01
ENSRNOG00000012105.L01	315912	Tbc1d8b	TBC1 domain family, member 8B (with GRAM domain) [Source:RGD Symbol;Acc:1563084]	6.77	1.75	-1.95	0.0334	0.766105	yes	DOWN	N	N	N	Y	Y	6.98	1.7
ENSRNOG00000024929.L01	362906	Nudcd1	NudC domain containing 1 [Source:RGD Symbol;Acc:1310624]	8.69	3.3	-1.4	0.0336	0.766123	yes	DOWN	N	N	N	Y	Y	8.96	3.2
ENSRNOG00000018778.L01	363058	Cadm1	cell adhesion molecule 1 [Source:RGD Symbol;Acc:1310999]	5.41	1.75	-1.63	0.0336	0.766123	yes	DOWN	N	N	N	Y	Y	5.58	1.7
ENSRNOG00000005814.L01	691543	Katnbl1	katanin p80 subunit B-like 1 [Source:RGD Symbol;Acc:1582771]	5.44	1.27	-2.1	0.03365	0.766123	yes	DOWN	N	N	N	Y	Y	5.61	1.23
ENSRNOG00000006069	29702	Eif2ak3	eukaryotic translation initiation factor 2 alpha kinase 3 [Source:RGD Symbol;Acc:70884]	24.9	10.5	-1.25	0.0337	0.766123	yes	DOWN	N	N	N	Y	Y	25.64	10.17
ENSRNOG00000026143.L01	680515	Ckap2l	cytoskeleton associated protein 2-like [Source:RGD Symbol;Acc:1590645]	2.9	0.739	-1.97	0.0337	0.766123	yes	DOWN	N	N	N	Y	Y	2.99	0.72
ENSRNOG00000004951.L01	311478	Kif16b	kinesin family member 16B [Source:RGD Symbol;Acc:1310146]	8.9	3.75	-1.24	0.03375	0.766132	yes	DOWN	N	N	N	Y	Y	9.18	3.64
ENSRNOG00000013971.L01	293820	Psat1	phosphoserine aminotransferase 1 [Source:RGD Symbol;Acc:735170]	10.2	3.19	-1.67	0.03385	0.766132	yes	DOWN	N	N	N	Y	Y	10.48	3.1
ENSRNOG00000011925.L01	315829	Fam83b	family with sequence similarity 83, member B [Source:RGD Symbol;Acc:1311988]	4.36	1.7	-1.36	0.03385	0.766132	yes	DOWN	N	N	N	Y	Y	4.5	1.65
ENSRNOG00000012442.L01	308797	Cemip	cell migration inducing protein, hyaluronan binding [Source:RGD Symbol;Acc:1305254]	0.736	0.101	-2.87	0.03395	0.766424	yes	DOWN	N	N	N	Y	Y	0.76	0.1
ENSRNOG00000010887.L01	363016	RGD1309534	similar to RIKEN cDNA 4931406C07 [Source:RGD Symbol;Acc:1309534]	59.5	23.8	-1.32	0.03395	0.766424	yes	DOWN	N	N	N	Y	Y	61.38	23.1
ENSRNOG00000023828.L01	680875	LOC680875	similar to dystonin isoform 1 [Source:RGD Symbol;Acc:1587008]	19.9	6.71	-1.57	0.03405	0.766424	yes	DOWN	N	N	N	Y	Y	20.52	6.51
ENSRNOG00000013598.L01	362510	Melk	maternal embryonic leucine zipper kinase [Source:RGD Symbol;Acc:1308974]	1.57	0.25	-2.65	0.03415	0.767831	yes	DOWN	N	N	N	Y	Y	1.62	0.24
ENSRNOG00000008115.L01	296060	Arhgap11a	Rho GTPase activating protein 11A [Source:RGD Symbol;Acc:1309107]	4.15	1.39	-1.58	0.0342	0.768113	yes	DOWN	N	N	N	Y	Y	4.28	1.35
ENSRNOG00000018635.L01	25203	Ccnb1	cyclin B1 [Source:RGD Symbol;Acc:2291]	7.5	2.07	-1.86	0.03485	0.774706	yes	DOWN	N	N	N	Y	Y	7.74	2.01
ENSRNOG00000037227.L01	24884	Yes1	Yamaguchi sarcoma viral (v-yes) oncogene homolog 1 [Source:RGD Symbol;Acc:3977]	15.8	6.05	-1.39	0.0349	0.774706	yes	DOWN	N	N	N	Y	Y	16.31	5.87
ENSRNOG00000022710.L01	499847	Prrg4	proline rich Gla (G-carboxyglutamic acid) 4 (transmembrane) [Source:RGD Symbol;Acc:1560542]	10.7	4.61	-1.21	0.03495	0.774706	yes	DOWN	N	N	N	Y	Y	11.01	4.48
ENSRNOG00000018742.L01	292849	Klk11	kallikrein related-peptidase 11 [Source:RGD Symbol;Acc:1308690]	4.89	0.538	-3.18	0.03505	0.774706	yes	DOWN	N	N	N	Y	Y	5.04	0.52
ENSRNOG00000010260.L01	363062	Dixdc1	DIX domain containing 1 [Source:RGD Symbol;Acc:1309902]	9.01	3.45	-1.39	0.03525	0.774706	yes	DOWN	N	N	N	Y	Y	9.29	3.35
ENSRNOG00000007944.L01	297504	Edem1	ER degradation enhancer, mannosidase alpha-like 1 [Source:RGD Symbol;Acc:1563633]	20	8.67	-1.2	0.0354	0.776336	yes	DOWN	N	N	N	Y	Y	20.59	8.42
ENSRNOG00000022684	25236	Gpc3	glypican 3 [Source:RGD Symbol;Acc:2725]	48.6	21	-1.21	0.03555	0.77796	yes	DOWN	N	N	N	Y	Y	50.14	20.36
ENSRNOG00000017775.L01	25552	Slc5a1	solute carrier family 5 (sodium/glucose cotransporter), member 1 [Source:RGD Symbol;Acc:3713]	2.45	0.592	-2.05	0.0358	0.781761	yes	DOWN	N	N	N	Y	Y	2.53	0.57
ENSRNOG00000008209.L01	362924	St3gal1	ST3 beta-galactoside alpha-2,3-sialyltransferase 1 [Source:RGD Symbol;Acc:1309373]	44.6	11.7	-1.93	0.0362	0.786978	yes	DOWN	N	N	N	Y	Y	46.01	11.4
ENSRNOG00000032327.L01	360722	Pdia5	protein disulfide isomerase family A, member 5 [Source:RGD Symbol;Acc:1359236]	12	4.45	-1.43	0.03625	0.786978	yes	DOWN	N	N	N	Y	Y	12.35	4.32
ENSRNOG00000015921	691979	Esco2	establishment of sister chromatid cohesion N-acetyltransferase 2 [Source:RGD Symbol;Acc:1593313]	1.81	0.431	-2.07	0.0363	0.786978	yes	DOWN	N	N	N	Y	Y	1.86	0.42
ENSRNOG00000003183	64507	Fmod	fibromodulin [Source:RGD Symbol;Acc:619769]	11.4	4.46	-1.35	0.03635	0.786978	yes	DOWN	N	N	N	Y	Y	11.73	4.33
ENSRNOG00000016752.L01	171547	Crispld2	cysteine-rich secretory protein LCCL domain containing 2 [Source:RGD Symbol;Acc:620860]	24	10.2	-1.23	0.0367	0.790459	yes	DOWN	N	N	N	Y	Y	24.73	9.92
ENSRNOG00000022499.L01	363174	Sgol1	shugoshin-like 1 (S. pombe) [Source:RGD Symbol;Acc:1593238]	1.14	0.129	-3.15	0.037	0.794511	yes	DOWN	N	N	N	Y	Y	1.18	0.13
ENSRNOG00000014398.L01	305974	Scara5	scavenger receptor class A, member 5 [Source:RGD Symbol;Acc:1306539]	36.6	14.7	-1.31	0.0372	0.794511	yes	DOWN	N	N	N	Y	Y	37.77	14.29
ENSRNOG00000003508.L01	287177	Ergic1	endoplasmic reticulum-golgi intermediate compartment (ERGIC) 1 [Source:RGD Symbol;Acc:1585015]	42.3	14.9	-1.5	0.0375	0.794511	yes	DOWN	N	N	N	Y	Y	43.6	14.49
ENSRNOG00000012286.L01	308716	Il20ra	interleukin 20 receptor, alpha [Source:RGD Symbol;Acc:1307335]	8.95	2.81	-1.67	0.03825	0.794511	yes	DOWN	N	N	N	Y	Y	9.23	2.73
ENSRNOG00000013939	64389	Defb4	defensin beta 4 [Source:RGD Symbol;Acc:619944]	1.45	0	#NAME?	0.03875	0.794511	yes	DOWN	N	N	N	Y	Y	1.5	0
ENSRNOG00000015956.L01	361495	Usp29	ubiquitin specific peptidase 29 [Source:RGD Symbol;Acc:1306648]	2.79	0.734	-1.93	0.03875	0.794511	yes	DOWN	N	N	N	Y	Y	2.88	0.71
ENSRNOG00000024089.L01	294925	Fndc3b	fibronectin type III domain containing 3B [Source:RGD Symbol;Acc:1311673]	14	6.11	-1.2	0.03895	0.796674	yes	DOWN	N	N	N	Y	Y	14.45	5.93
ENSRNOG00000011377.L01	305828	Socs4	suppressor of cytokine signaling 4 [Source:RGD Symbol;Acc:1306503]	5.49	1.88	-1.55	0.039	0.796674	yes	DOWN	N	N	N	Y	Y	5.66	1.82
ENSRNOG00000000823.L01	309798	Gcc2	GRIP and coiled-coil domain containing 2 [Source:RGD Symbol;Acc:1305732]	9.56	4.27	-1.16	0.0396	0.803892	yes	DOWN	N	N	N	Y	Y	9.86	4.15
ENSRNOG00000046772.L01	683506	Fam83c	family with sequence similarity 83, member C [Source:RGD Symbol;Acc:1585687]	3.61	1.14	-1.66	0.03995	0.806099	yes	DOWN	N	N	N	Y	Y	3.73	1.11
ENSRNOG00000011284.L01	310849	Sgms2	sphingomyelin synthase 2 [Source:RGD Symbol;Acc:1305778]	3.76	1.26	-1.58	0.0404	0.806099	yes	DOWN	N	N	N	Y	Y	3.87	1.22
ENSRNOG00000009503.L01	295538	Depdc1	DEP domain containing 1 [Source:RGD Symbol;Acc:1306987]	2.2	0.202	-3.45	0.0408	0.806099	yes	DOWN	N	N	N	Y	Y	2.27	0.2
ENSRNOG00000014104.L01	25132	Myo5b	myosin Vb [Source:RGD Symbol;Acc:621347]	6.28	2.68	-1.23	0.04145	0.813238	yes	DOWN	N	N	N	Y	Y	6.47	2.6
ENSRNOG00000001730.L01	619382	Acap2	ArfGAP with coiled-coil, ankyrin repeat and PH domains 2 [Source:RGD Symbol;Acc:1562939]	9.23	3.81	-1.28	0.04145	0.813238	yes	DOWN	N	N	N	Y	Y	9.51	3.7
ENSRNOG00000032834.L01	29734	Hspa13	heat shock protein 70 family, member 13 [Source:RGD Symbol;Acc:3775]	13.1	5.8	-1.18	0.0419	0.819711	yes	DOWN	N	N	N	Y	Y	13.51	5.63
ENSRNOG00000010714	246186	Fgl1	fibrinogen-like 1 [Source:RGD Symbol;Acc:620169]	6.5	1.65	-1.98	0.04205	0.820295	yes	DOWN	N	N	N	Y	Y	6.7	1.6
ENSRNOG00000014478.L01	306022	Fndc3a	fibronectin type III domain containing 3a [Source:RGD Symbol;Acc:1304736]	15.7	6.74	-1.22	0.04205	0.820295	yes	DOWN	N	N	N	Y	Y	16.19	6.54
ENSRNOG00000009945.L01	315926	Pls1	plastin 1 [Source:RGD Symbol;Acc:1307142]	12	5.09	-1.23	0.04215	0.820677	yes	DOWN	N	N	N	Y	Y	12.35	4.95
ENSRNOG00000019328	58835	Phgdh	phosphoglycerate dehydrogenase [Source:RGD Symbol;Acc:61987]	10.8	3.54	-1.6	0.04235	0.820676	yes	DOWN	N	N	N	Y	Y	11.11	3.44
ENSRNOG00000001547	84114	Agps	alkylglycerone phosphate synthase [Source:RGD Symbol;Acc:620364]	17.9	6.46	-1.47	0.0425	0.822015	yes	DOWN	N	N	N	Y	Y	18.43	6.26
ENSRNOG00000015971.L01	83629	Slc12a2	solute carrier family 12 (sodium/potassium/chloride transporter), member 2 [Source:RGD Symbol;Acc:620809]	99.9	33.9	-1.56	0.04255	0.822015	yes	DOWN	N	N	N	Y	Y	102.95	32.97
ENSRNOG00000002331	25375	Aldh3a1	aldehyde dehydrogenase 3 family, member A1 [Source:RGD Symbol;Acc:2088]	138	56.2	-1.29	0.0427	0.822015	yes	DOWN	N	N	N	Y	Y	142	54.56
ENSRNOG00000024689.L01	171160	Hopx	HOP homeobox [Source:RGD Symbol;Acc:621841]	169	72.4	-1.22	0.0431	0.825835	yes	DOWN	N	N	N	Y	Y	174.53	70.28
ENSRNOG00000024650	691173	Ckap2	cytoskeleton associated protein 2 [Source:RGD Symbol;Acc:1311631]	4.65	1.4	-1.73	0.04335	0.8283	yes	DOWN	N	N	N	Y	Y	4.8	1.36
ENSRNOG00000018282.L01	83585	Gda	guanine deaminase [Source:RGD Symbol;Acc:621617]	110	40.1	-1.45	0.0436	0.828622	yes	DOWN	N	N	N	Y	Y	113.18	38.95
ENSRNOG00000021771.L01	300656	Trim29	tripartite motif-containing 29 [Source:RGD Symbol;Acc:1307858]	45.7	20.2	-1.17	0.04395	0.828939	yes	DOWN	N	N	N	Y	Y	47.1	19.64
ENSRNOG00000015410	306805	Aspn	asporin [Source:RGD Symbol;Acc:1549776]	4.6	1.18	-1.96	0.04465	0.833286	yes	DOWN	N	N	N	Y	Y	4.74	1.15
ENSRNOG00000043445.L01	361993	Them5	thioesterase superfamily member 5 [Source:RGD Symbol;Acc:1562059]	41.4	14.1	-1.55	0.0447	0.833286	yes	DOWN	N	N	N	Y	Y	42.73	13.69
ENSRNOG00000021589.L01	302396	RGD1561931	similar to KIAA2022 protein [Source:RGD Symbol;Acc:1561931]	1.19	0.361	-1.72	0.04475	0.833286	yes	DOWN	N	N	N	Y	Y	1.22	0.35
ENSRNOG00000015867.L01	291770	Chst9	carbohydrate (N-acetylgalactosamine 4-0) sulfotransferase 9 [Source:RGD Symbol;Acc:1307302]	18.6	8.14	-1.19	0.0448	0.833459	yes	DOWN	N	N	N	Y	Y	19.18	7.91
ENSRNOG00000015794	311598	Fam83d	family with sequence similarity 83, member D [Source:RGD Symbol;Acc:1565583]	2.76	0.507	-2.45	0.0452	0.840138	yes	DOWN	N	N	N	Y	Y	2.85	0.49
ENSRNOG00000042978.L01	553106	Ncald	neurocalcin delta [Source:RGD Symbol;Acc:1560287]	9.64	3.97	-1.28	0.04525	0.840304	yes	DOWN	N	N	N	Y	Y	9.94	3.85
ENSRNOG00000017439.L01	315795	Cgnl1	cingulin-like 1 [Source:RGD Symbol;Acc:1304623]	20.8	8.8	-1.24	0.0454	0.840803	yes	DOWN	N	N	N	Y	Y	21.41	8.54
ENSRNOG00000010996.L02	360920	Mob1b	MOB kinase activator 1B [Source:RGD Symbol;Acc:1305114]	15	6.46	-1.21	0.04585	0.846077	yes	DOWN	N	N	N	Y	Y	15.45	6.28
ENSRNOG00000004487.L01	690209	Nek2	NIMA-related kinase 2 [Source:RGD Symbol;Acc:619792]	1.57	0.237	-2.72	0.04625	0.849631	yes	DOWN	N	N	N	Y	Y	1.62	0.23
ENSRNOG00000004476.L01	114557	Wif1	Wnt inhibitory factor 1 [Source:RGD Symbol;Acc:619774]	10.7	4.07	-1.39	0.0463	0.849788	yes	DOWN	N	N	N	Y	Y	11	3.95
ENSRNOG00000012835.L01	315330	Espl1	extra spindle pole bodies homolog 1 (S. cerevisiae) [Source:RGD Symbol;Acc:1306266]	1.65	0.483	-1.77	0.04635	0.849944	yes	DOWN	N	N	N	Y	Y	1.7	0.47
ENSRNOG00000014441	303530	Krt16	keratin 16 [Source:RGD Symbol;Acc:1590901]	5.57	1.07	-2.39	0.04665	0.851633	yes	DOWN	N	N	N	Y	Y	5.75	1.03
ENSRNOG00000027447.L01	311030	Stam2	signal transducing adaptor molecule (SH3 domain and ITAM motif) 2 [Source:RGD Symbol;Acc:1311497]	13.6	5.78	-1.24	0.0468	0.852246	yes	DOWN	N	N	N	Y	Y	14.07	5.61
ENSRNOG00000034026.L01	362702	Lclat1	lysocardiolipin acyltransferase 1 [Source:RGD Symbol;Acc:1565906]	8.27	3.02	-1.45	0.04685	0.852246	yes	DOWN	N	N	N	Y	Y	8.53	2.93
ENSRNOG00000043390.L01	362910	Samd12	sterile alpha motif domain containing 12 [Source:RGD Symbol;Acc:1561402]	4.79	0.645	-2.89	0.047	0.852702	yes	DOWN	N	N	N	Y	Y	4.94	0.63
ENSRNOG00000012190.L02	300920	Cldn2	claudin 2 [Source:RGD Symbol;Acc:1560247]	16.2	2.82	-2.52	0.0471	0.853157	yes	DOWN	N	N	N	Y	Y	16.72	2.74
ENSRNOG00000036682.L01	287877	Pycr1	pyrroline-5-carboxylate reductase 1 [Source:RGD Symbol;Acc:1307863]	13.7	4.5	-1.6	0.04715	0.853157	yes	DOWN	N	N	N	Y	Y	14.11	4.37
ENSRNOG00000014259.L01	298506	Mycl	v-myc avian myelocytomatosis viral oncogene lung carcinoma derived homolog [Source:RGD Symbol;Acc:1588591]	9.57	3.83	-1.32	0.0473	0.854361	yes	DOWN	N	N	N	Y	Y	9.87	3.72
ENSRNOG00000042714.L01	501907	RGD1559459	similar to Expressed sequence AI788959 [Source:RGD Symbol;Acc:1559459]	3.79	0.904	-2.07	0.04785	0.859747	yes	DOWN	N	N	N	Y	Y	3.91	0.88
ENSRNOG00000011238.L01	310467	Tiparp	TCDD-inducible poly(ADP-ribose) polymerase [Source:RGD Symbol;Acc:1306171]	12.9	5.82	-1.14	0.0479	0.859891	yes	DOWN	N	N	N	Y	Y	13.25	5.65
ENSRNOG00000033973.L01	500686	Ccdc177	coiled-coil domain containing 177 [Source:RGD Symbol;Acc:1561115]	2.63	0.868	-1.6	0.0481	0.861971	yes	DOWN	N	N	N	Y	Y	2.72	0.84
ENSRNOG00000009613.L01	501026	Sh3bgrl2	SH3 domain binding glutamate-rich protein like 2 [Source:RGD Symbol;Acc:1591931]	29.3	13.3	-1.14	0.04825	0.863148	yes	DOWN	N	N	N	Y	Y	30.19	12.88
ENSRNOG00000012036.L01	116548	Pcsk5	proprotein convertase subtilisin/kexin type 5 [Source:RGD Symbol;Acc:620326]	1.76	0.468	-1.91	0.04875	0.865504	yes	DOWN	N	N	N	Y	Y	1.82	0.45
ENSRNOG00000021381.L01	291530	Ccdc68	coiled-coil domain containing 68 [Source:RGD Symbol;Acc:1561424]	3.8	0.8	-2.25	0.04895	0.865504	yes	DOWN	N	N	N	Y	Y	3.92	0.78
ENSRNOG00000011332.L01	100912530	Clspn	claspin [Source:RGD Symbol;Acc:1309083]	0.654	0.0899	-2.86	0.04905	0.865504	yes	DOWN	N	N	N	Y	Y	0.67	0.09
ENSRNOG00000021203.L01	309187	Atl3	atlastin GTPase 3 [Source:RGD Symbol;Acc:1309871]	21.9	9.58	-1.19	0.0491	0.865504	yes	DOWN	N	N	N	Y	Y	22.59	9.3
ENSRNOG00000022255.L01	305265	Tmprss11e	transmembrane protease, serine 11e [Source:RGD Symbol;Acc:1561698]	1.11	0.246	-2.18	0.0496	0.867598	yes	DOWN	N	N	N	Y	Y	1.15	0.24
ENSRNOG00000005336	287108	Prss27	protease, serine 27 [Source:RGD Symbol;Acc:1303256]	12.3	3.77	-1.7	0.04965	0.867731	yes	DOWN	N	N	N	Y	Y	12.67	3.66
ENSRNOG00000015086.L01	25629	Plin1	perilipin 1 [Source:RGD Symbol;Acc:3351]	0	0.954	inf	5e-05	0.0853458	yes	UP	N	Y	Y	Y	Y	0	0.93
ENSRNOG00000018598	27064	Ankrd1	ankyrin repeat domain 1 [Source:RGD Symbol;Acc:61989]	15.5	77.8	2.33	0.0002	0.215611	yes	UP	N	N	Y	Y	Y	15.94	75.51
ENSRNOG00000018978.L01	293591	Cd163l1	CD163 molecule-like 1 [Source:RGD Symbol;Acc:1307378]	2.53	20.1	2.99	0.0002	0.215611	yes	UP	N	N	Y	Y	Y	2.61	19.47
ENSRNOG00000045885	100365810	LOC100365810	40S ribosomal protein S17-like [Source:RGD Symbol;Acc:2318277]	0	10.1	inf	0.0002	0.215611	yes	UP	N	N	Y	Y	Y	0	9.78
ENSRNOG00000026493.L01	361276	Cdnf	cerebral dopamine neurotrophic factor [Source:RGD Symbol;Acc:1307600]	2.22	16.5	2.89	0.00035	0.243504	yes	UP	N	N	Y	Y	Y	2.29	16.02
ENSRNOG00000046834.L01	24232	C3	complement component 3 [Source:RGD Symbol;Acc:2232]	4.16	17.5	2.07	0.00065	0.243504	yes	UP	N	N	Y	Y	Y	4.29	16.96
ENSRNOG00000008235.L01	117558	Mylk2	myosin light chain kinase 2 [Source:RGD Symbol;Acc:620934]	6.81	30.9	2.18	0.0007	0.243504	yes	UP	N	N	Y	Y	Y	7.03	29.94
ENSRNOG00000021027.L01	24309	Dbp	D site of albumin promoter (albumin D-box) binding protein [Source:RGD Symbol;Acc:2491]	18.5	104	2.48	0.00075	0.243504	yes	UP	N	N	Y	Y	Y	19.1	100.43
ENSRNOG00000011518	501718	Dusp26	dual specificity phosphatase 26 (putative) [Source:RGD Symbol;Acc:1310090]	7.32	40.3	2.46	0.0008	0.243504	yes	UP	N	N	Y	Y	Y	7.55	39.13
ENSRNOG00000007574.L01	29511	Padi2	peptidyl arginine deiminase, type II [Source:RGD Symbol;Acc:3288]	8.37	32.5	1.96	0.0013	0.243504	yes	UP	N	N	Y	Y	Y	8.63	31.52
ENSRNOG00000008847.L01	79217	Gja3	gap junction protein, alpha 3 [Source:RGD Symbol;Acc:621820]	1.23	11.1	3.17	0.00135	0.243504	yes	UP	N	N	Y	Y	Y	1.27	10.79
ENSRNOG00000047098	361619	Hbb-b1	hemoglobin, beta adult major chain [Source:RGD Symbol;Acc:1595848]	31.5	141	2.17	0.0015	0.243504	yes	UP	N	N	Y	Y	Y	32.44	137.12
ENSRNOG00000027489.L01	498194	Mn1	meningioma 1 [Source:RGD Symbol;Acc:1565571]	3.5	13.6	1.96	0.00155	0.243504	yes	UP	N	N	Y	Y	Y	3.61	13.2
ENSRNOG00000019627.L01	292879	Mybpc2	myosin binding protein C, fast-type [Source:RGD Symbol;Acc:1311596]	24.2	127	2.38	0.0016	0.243504	yes	UP	N	N	Y	Y	Y	25.01	122.77
ENSRNOG00000006663.L01	115771	Usp2	ubiquitin specific peptidase 2 [Source:RGD Symbol;Acc:621073]	5.43	22	2.02	0.00165	0.243504	yes	UP	N	N	Y	Y	Y	5.6	21.37
ENSRNOG00000021380.L01	303671	Fads6	fatty acid desaturase 6 [Source:RGD Symbol;Acc:1311950]	1.61	10.9	2.76	0.00195	0.251207	yes	UP	N	N	Y	Y	Y	1.66	10.54
ENSRNOG00000011754.L01	306616	Myom2	myomesin 2 [Source:RGD Symbol;Acc:631437]	8.94	33.5	1.91	0.0022	0.278164	yes	UP	N	N	Y	Y	Y	9.22	32.55
ENSRNOG00000004537.L01	83574	Rxrg	retinoid X receptor gamma [Source:RGD Symbol;Acc:620046]	5.17	24.9	2.27	0.00235	0.291728	yes	UP	N	N	Y	Y	Y	5.33	24.12
ENSRNOG00000007765.L01	295691	Frzb	frizzled-related protein [Source:RGD Symbol;Acc:1311315]	6.51	24.3	1.9	0.00255	0.310903	yes	UP	N	N	Y	Y	Y	6.72	23.57
ENSRNOG00000012181	24539	Lpl	lipoprotein lipase [Source:RGD Symbol;Acc:3017]	19.8	82.5	2.06	0.0026	0.311437	yes	UP	N	N	Y	Y	Y	20.39	80.06
ENSRNOG00000010079	54232	Car3	carbonic anhydrase 3 [Source:RGD Symbol;Acc:2241]	1.31	14.8	3.5	0.0026	0.311437	yes	UP	N	N	Y	Y	Y	1.35	14.4
ENSRNOG00000026679.L01	315611	Scn4b	sodium channel, voltage-gated, type IV, beta subunit [Source:RGD Symbol;Acc:631404]	18.2	69.6	1.93	0.0026	0.311437	yes	UP	N	N	Y	Y	Y	18.81	67.56
ENSRNOG00000007628	362930	Ptp4a3	protein tyrosine phosphatase type IVA, member 3 [Source:RGD Symbol;Acc:1308687]	61.3	257	2.07	0.0028	0.329611	yes	UP	N	N	Y	Y	Y	63.18	248.95
ENSRNOG00000019390.L01	316088	Klhl40	kelch-like family member 40 [Source:RGD Symbol;Acc:1305368]	18	63.1	1.81	0.00285	0.329811	yes	UP	N	N	Y	Y	Y	18.52	61.25
ENSRNOG00000038625.L01	691411	Sbk2	SH3 domain binding kinase family, member 2 [Source:RGD Symbol;Acc:1563279]	13.7	46.3	1.76	0.00285	0.329811	yes	UP	N	N	Y	Y	Y	14.09	44.92
ENSRNOG00000018611	29268	Tpsb2	tryptase beta 2 [Source:RGD Symbol;Acc:3065]	2.95	20	2.76	0.0029	0.333712	yes	UP	N	N	Y	Y	Y	3.04	19.42
ENSRNOG00000016603.L01	308410	Rtn2	reticulon 2 [Source:RGD Symbol;Acc:1303245]	65.8	250	1.93	0.003	0.339497	yes	UP	N	N	Y	Y	Y	67.86	242.94
ENSRNOG00000032150	81636	Adcy2	adenylate cyclase 2 (brain) [Source:RGD Symbol;Acc:619965]	9.91	36.2	1.87	0.0032	0.358173	yes	UP	N	N	Y	Y	Y	10.22	35.18
ENSRNOG00000002800.L01	302421	Gdpd2	glycerophosphodiester phosphodiesterase domain containing 2 [Source:RGD Symbol;Acc:1560780]	8.34	30.3	1.86	0.0033	0.365372	yes	UP	N	N	Y	Y	Y	8.6	29.39
ENSRNOG00000022099	365377	Trim72	tripartite motif-containing 72 [Source:RGD Symbol;Acc:1562778]	28.3	99.6	1.81	0.0034	0.371928	yes	UP	N	N	Y	Y	Y	29.21	96.63
ENSRNOG00000009073.L01	29388	Tnni1	troponin I type 1 (skeletal, slow) [Source:RGD Symbol;Acc:621765]	4.51	27.6	2.61	0.00345	0.371928	yes	UP	N	N	Y	Y	Y	4.66	26.78
ENSRNOG00000019019	290223	Fitm1	fat storage-inducing transmembrane protein 1 [Source:RGD Symbol;Acc:1306911]	28.3	112	1.98	0.00345	0.371928	yes	UP	N	N	Y	Y	Y	29.23	108.36
ENSRNOG00000047860.L01	501283	Plin5	perilipin 5 [Source:RGD Symbol;Acc:1589602]	4.91	20.2	2.04	0.00345	0.371928	yes	UP	N	N	Y	Y	Y	5.07	19.56
ENSRNOG00000014641	287122	Rpl3l	ribosomal protein L3-like [Source:RGD Symbol;Acc:1306315]	72.7	283	1.96	0.00355	0.378722	yes	UP	N	N	Y	Y	Y	75.01	274.87
ENSRNOG00000003998.L01	303468	Sgca	sarcoglycan, alpha (dystrophin-associated glycoprotein) [Source:RGD Symbol;Acc:1308062]	26.3	87.7	1.74	0.00385	0.400302	yes	UP	N	N	Y	Y	Y	27.09	85.14
ENSRNOG00000006110.L01	297748	Jph1	junctophilin 1 [Source:RGD Symbol;Acc:1308789]	6.13	21.1	1.78	0.0042	0.432305	yes	UP	N	N	Y	Y	Y	6.32	20.48
ENSRNOG00000037435.L01	500750	Tmem196	transmembrane protein 196 [Source:RGD Symbol;Acc:1562527]	1.46	8.51	2.54	0.0042	0.432305	yes	UP	N	N	Y	Y	Y	1.5	8.27
ENSRNOG00000003245	29658	Cacng1	calcium channel, voltage-dependent, gamma subunit 1 [Source:RGD Symbol;Acc:2249]	17.9	61.7	1.78	0.00425	0.433098	yes	UP	N	N	Y	Y	Y	18.46	59.85
ENSRNOG00000013034	361003	Dupd1	dual specificity phosphatase and pro isomerase domain containing 1 [Source:RGD Symbol;Acc:1310229]	10.6	43.7	2.04	0.0043	0.436024	yes	UP	N	N	Y	Y	Y	10.98	42.42
ENSRNOG00000003336.L01	83708	Mybph	myosin binding protein H [Source:RGD Symbol;Acc:620287]	20.6	64.6	1.65	0.0047	0.465073	yes	UP	N	N	Y	Y	Y	21.26	62.66
ENSRNOG00000021200	310681	Hfe2	hemochromatosis type 2 (juvenile) [Source:RGD Symbol;Acc:1310195]	40.8	159	1.96	0.0047	0.465073	yes	UP	N	N	Y	Y	Y	42.06	154.21
ENSRNOG00000019057.L01	85420	Prkcq	protein kinase C, theta [Source:RGD Symbol;Acc:620968]	5.29	17	1.68	0.00495	0.478259	yes	UP	N	N	Y	Y	Y	5.46	16.45
ENSRNOG00000018989.L01	291180	Epdr1	ependymin related 1 [Source:RGD Symbol;Acc:1359161]	8.61	29.7	1.79	0.00495	0.478259	yes	UP	N	N	Y	Y	Y	8.87	28.81
ENSRNOG00000010805.L01	79451	Fabp4	fatty acid binding protein 4, adipocyte [Source:RGD Symbol;Acc:69309]	197	643	1.71	0.00505	0.483361	yes	UP	N	N	Y	Y	Y	203.37	623.92
ENSRNOG00000036794.L01	498005	Asb16	ankyrin repeat and SOCS box-containing 16 [Source:RGD Symbol;Acc:1563878]	5.36	20.6	1.94	0.00525	0.489616	yes	UP	N	N	Y	Y	Y	5.53	20.02
ENSRNOG00000012879	79131	Fabp3	fatty acid binding protein 3, muscle and heart [Source:RGD Symbol;Acc:69048]	161	766	2.25	0.0053	0.489616	yes	UP	N	N	Y	Y	Y	165.78	743.08
ENSRNOG00000002303.L01	117052	Kcnj12	potassium inwardly-rectifying channel, subfamily J, member 12 [Source:RGD Symbol;Acc:621660]	3.29	12.9	1.97	0.0053	0.489616	yes	UP	N	N	Y	Y	Y	3.39	12.53
ENSRNOG00000028041.L01	171409	Tnnt1	troponin T type 1 (skeletal, slow) [Source:RGD Symbol;Acc:621852]	58.4	205	1.81	0.00535	0.489616	yes	UP	N	N	Y	Y	Y	60.25	199.24
ENSRNOG00000000606.L01	690865	Pcdh15	protocadherin 15 [Source:RGD Symbol;Acc:1590969]	0.046	0.695	3.92	0.00535	0.489616	yes	UP	N	N	Y	Y	Y	0.05	0.67
ENSRNOG00000049942.L01	498579	RGD1564899	similar to chromosome 10 open reading frame 71 [Source:RGD Symbol;Acc:1564899]	6.53	21.6	1.73	0.0054	0.489616	yes	UP	N	N	Y	Y	Y	6.73	20.94
ENSRNOG00000031249.L01	80900	Slco1a2	solute carrier organic anion transporter family, member 1A2 [Source:RGD Symbol;Acc:70985]	5.2	18.9	1.86	0.00545	0.489616	yes	UP	N	N	Y	Y	Y	5.36	18.34
ENSRNOG00000021128.L01	83535	Kcnj11	potassium inwardly rectifying channel, subfamily J, member 11 [Source:RGD Symbol;Acc:69247]	8.26	25.2	1.61	0.00545	0.489616	yes	UP	N	N	Y	Y	Y	8.52	24.48
ENSRNOG00000048961.L01	117095	Bhlhe41	basic helix-loop-helix family, member e41 [Source:RGD Symbol;Acc:70900]	2.49	10.7	2.11	0.00545	0.489616	yes	UP	N	N	Y	Y	Y	2.56	10.41
ENSRNOG00000008170.L01	296345	Jph2	junctophilin 2 [Source:RGD Symbol;Acc:1305196]	16	51.6	1.69	0.00545	0.489616	yes	UP	N	N	Y	Y	Y	16.48	50.05
ENSRNOG00000004518.L01	50688	Cacnb1	calcium channel, voltage-dependent, beta 1 subunit [Source:RGD Symbol;Acc:68382]	5.12	16.8	1.72	0.0056	0.492295	yes	UP	N	N	Y	Y	Y	5.28	16.33
ENSRNOG00000016062.L01	362242	Snta1	syntrophin, alpha 1 [Source:RGD Symbol;Acc:1307068]	19.6	62.8	1.68	0.0056	0.492295	yes	UP	N	N	Y	Y	Y	20.27	60.9
ENSRNOG00000020779.L01	365241	Kcna7	potassium voltage-gated channel, shaker-related subfamily, member 7 [Source:RGD Symbol;Acc:1309632]	6.89	22.4	1.7	0.0056	0.492295	yes	UP	N	N	Y	Y	Y	7.11	21.74
ENSRNOG00000008050.L01	362895	Stac3	SH3 and cysteine rich domain 3 [Source:RGD Symbol;Acc:1308964]	26.5	90.8	1.77	0.00565	0.494568	yes	UP	N	N	Y	Y	Y	27.38	88.05
ENSRNOG00000009466	303373	Unc45b	unc-45 homolog B (C. elegans) [Source:RGD Symbol;Acc:1305666]	11.6	38.2	1.72	0.0057	0.496822	yes	UP	N	N	Y	Y	Y	11.99	37.06
ENSRNOG00000012477.L01	24799	Eef1a2	eukaryotic translation elongation factor 1 alpha 2 [Source:RGD Symbol;Acc:3781]	66.8	270	2.02	0.00575	0.499056	yes	UP	N	N	Y	Y	Y	68.9	261.96
ENSRNOG00000048169.L01	500377	Tuba8	tubulin, alpha 8 [Source:RGD Symbol;Acc:1566041]	25.8	83	1.69	0.0061	0.516307	yes	UP	N	N	Y	Y	Y	26.63	80.57
ENSRNOG00000020484.L01	365391	Trpm5	transient receptor potential cation channel, subfamily M, member 5 [Source:RGD Symbol;Acc:1310620]	3.96	13.3	1.74	0.00635	0.528594	yes	UP	N	N	Y	Y	Y	4.08	12.86
ENSRNOG00000001177	64304	Acads	acyl-CoA dehydrogenase, C-2 to C-3 short chain [Source:RGD Symbol;Acc:620514]	32.1	104	1.69	0.0064	0.528594	yes	UP	N	N	Y	Y	Y	33.11	100.82
ENSRNOG00000000383.L01	309760	Mypn	myopalladin [Source:RGD Symbol;Acc:1308510]	10.5	35.2	1.75	0.0064	0.528594	yes	UP	N	N	Y	Y	Y	10.79	34.15
ENSRNOG00000032951	690423	Jsrp1	junctional sarcoplasmic reticulum protein 1 [Source:RGD Symbol;Acc:1596084]	42.3	130	1.62	0.0064	0.528594	yes	UP	N	N	Y	Y	Y	43.64	126.44
ENSRNOG00000001827.L02	100910195	Masp1	mannan-binding lectin serine peptidase 1 [Source:RGD Symbol;Acc:620213]	15.2	55	1.86	0.0065	0.530436	yes	UP	N	N	Y	Y	Y	15.67	53.42
ENSRNOG00000019557.L01	316614	Asb18	ankyrin repeat and SOCS box-containing 18 [Source:RGD Symbol;Acc:1310850]	1.45	10.9	2.92	0.0066	0.53646	yes	UP	N	N	Y	Y	Y	1.5	10.62
ENSRNOG00000021088.L01	295261	Tmod4	tropomodulin 4 [Source:RGD Symbol;Acc:1308940]	64.6	222	1.78	0.0067	0.5403	yes	UP	N	N	Y	Y	Y	66.67	215.78
ENSRNOG00000006931.L01	315500	Eepd1	endonuclease/exonuclease/phosphatase family domain containing 1 [Source:RGD Symbol;Acc:1307401]	9.59	32.4	1.76	0.00685	0.55023	yes	UP	N	N	Y	Y	Y	9.89	31.45
ENSRNOG00000046276	24583	Myh3	myosin, heavy chain 3, skeletal muscle, embryonic [Source:RGD Symbol;Acc:3138]	0.387	2.14	2.47	0.00715	0.561124	yes	UP	N	N	Y	Y	Y	0.4	2.07
ENSRNOG00000006420.L01	366262	Rbm38	RNA binding motif protein 38 [Source:RGD Symbol;Acc:1308503]	22.4	71.2	1.67	0.00715	0.561124	yes	UP	N	N	Y	Y	Y	23.1	69.09
ENSRNOG00000034161	688869	LOC681754	similar to cytochrome c oxidase, subunit VIb polypeptide 1 [Source:RGD Symbol;Acc:1591649]	122	387	1.67	0.00715	0.561124	yes	UP	N	N	Y	Y	Y	125.57	375.59
ENSRNOG00000037199.L01	301016	Spink8	serine peptidase inhibitor, Kazal type 8 [Source:RGD Symbol;Acc:1307150]	6.59	41.9	2.67	0.0072	0.562892	yes	UP	N	N	Y	Y	Y	6.79	40.69
ENSRNOG00000019527.L01	54240	Chrnd	cholinergic receptor, nicotinic, delta (muscle) [Source:RGD Symbol;Acc:2352]	3.35	14.3	2.09	0.00755	0.581378	yes	UP	N	N	Y	Y	Y	3.46	13.85
ENSRNOG00000003596	317258	Itgb1bp2	integrin beta 1 binding protein 2 [Source:RGD Symbol;Acc:1565015]	26.9	82.2	1.61	0.00765	0.584683	yes	UP	N	N	Y	Y	Y	27.79	79.79
ENSRNOG00000013468.L01	362676	Fam213b	family with sequence similarity 213, member B [Source:RGD Symbol;Acc:1308251]	16.9	59.6	1.82	0.0077	0.586316	yes	UP	N	N	Y	Y	Y	17.45	57.81
ENSRNOG00000015718.L01	300990	RGD1307461	similar to RIKEN cDNA 6430571L13 gene; similar to g20 protein [Source:RGD Symbol;Acc:1307461]	3.73	12.3	1.72	0.0079	0.589439	yes	UP	N	N	Y	Y	Y	3.85	11.94
ENSRNOG00000008609.L01	29155	Capn3	calpain 3 [Source:RGD Symbol;Acc:2269]	11.7	37.5	1.68	0.00795	0.589439	yes	UP	N	N	Y	Y	Y	12.06	36.35
ENSRNOG00000008001	81755	Rab3b	RAB3B, member RAS oncogene family [Source:RGD Symbol;Acc:620922]	10.7	40	1.91	0.00795	0.589439	yes	UP	N	N	Y	Y	Y	11.01	38.82
ENSRNOG00000007185.L01	304816	Lmod1	leiomodin 1 (smooth muscle) [Source:RGD Symbol;Acc:1307236]	14.1	47.8	1.76	0.00795	0.589439	yes	UP	N	N	Y	Y	Y	14.59	46.33
ENSRNOG00000028900.L01	24299	Cyp2a3	cytochrome P450, family 2, subfamily a, polypeptide 3 [Source:RGD Symbol;Acc:2465]	50	171	1.77	0.008	0.589439	yes	UP	N	N	Y	Y	Y	51.52	165.86
ENSRNOG00000020992	140927	Selenbp1	selenium binding protein 1 [Source:RGD Symbol;Acc:620571]	19.3	59.3	1.62	0.00815	0.598339	yes	UP	N	N	Y	Y	Y	19.86	57.57
ENSRNOG00000014698	24261	Chrnb1	cholinergic receptor, nicotinic, beta 1 (muscle) [Source:RGD Symbol;Acc:2349]	9.36	27.8	1.57	0.00825	0.601369	yes	UP	N	N	Y	Y	Y	9.65	26.97
ENSRNOG00000020339.L01	309459	Neurl1	neuralized E3 ubiquitin protein ligase 1 [Source:RGD Symbol;Acc:1307021]	3.67	12	1.71	0.0084	0.604075	yes	UP	N	N	Y	Y	Y	3.78	11.67
ENSRNOG00000013766	170465	Acaa2	acetyl-CoA acyltransferase 2 [Source:RGD Symbol;Acc:620482]	56.9	199	1.8	0.00845	0.604075	yes	UP	N	N	Y	Y	Y	58.72	193
ENSRNOG00000017716.L01	25708	Ucp3	uncoupling protein 3 (mitochondrial, proton carrier) [Source:RGD Symbol;Acc:3933]	16.2	49.5	1.61	0.00875	0.604075	yes	UP	N	N	Y	Y	Y	16.67	48.05
ENSRNOG00000017311.L01	361602	Me3	malic enzyme 3, NADP(+)-dependent, mitochondrial [Source:RGD Symbol;Acc:1311070]	10.6	34.2	1.68	0.009	0.604075	yes	UP	N	N	Y	Y	Y	10.98	33.18
ENSRNOG00000015774.L01	501162	Mreg	melanoregulin [Source:RGD Symbol;Acc:1562333]	7.94	24.1	1.6	0.009	0.604075	yes	UP	N	N	Y	Y	Y	8.18	23.4
ENSRNOG00000002256	305235	Art3	ADP-ribosyltransferase 3 [Source:RGD Symbol;Acc:628833]	37.4	116	1.63	0.0091	0.604075	yes	UP	N	N	Y	Y	Y	38.6	112.62
ENSRNOG00000003452.L01	302666	Asb11	ankyrin repeat and SOCS box-containing 11 [Source:RGD Symbol;Acc:1566298]	4.23	26.5	2.64	0.00915	0.604075	yes	UP	N	N	Y	Y	Y	4.36	25.68
ENSRNOG00000007896.L01	314996	Klhl38	kelch-like family member 38 [Source:RGD Symbol;Acc:1564169]	4.15	14.6	1.81	0.00915	0.604075	yes	UP	N	N	Y	Y	Y	4.28	14.17
ENSRNOG00000031396.L01	58844	Grb14	growth factor receptor bound protein 14 [Source:RGD Symbol;Acc:61869]	33.2	113	1.76	0.0094	0.604075	yes	UP	N	N	Y	Y	Y	34.28	109.62
ENSRNOG00000010681.L01	54284	Pitx2	paired-like homeodomain 2 [Source:RGD Symbol;Acc:3331]	6.97	23.7	1.77	0.00945	0.604075	yes	UP	N	N	Y	Y	Y	7.19	23.01
ENSRNOG00000000033.L01	305095	Tmcc2	transmembrane and coiled-coil domain family 2 [Source:RGD Symbol;Acc:1311960]	3.61	11.6	1.68	0.00965	0.604075	yes	UP	N	N	Y	Y	Y	3.72	11.22
ENSRNOG00000015011.L01	309415	Fam189a2	family with sequence similarity 189, member A2 [Source:RGD Symbol;Acc:1307524]	10	29.6	1.56	0.0097	0.604075	yes	UP	N	N	Y	Y	Y	10.35	28.71
ENSRNOG00000027434	311617	Fitm2	fat storage-inducing transmembrane protein 2 [Source:RGD Symbol;Acc:1307696]	9.38	27.2	1.53	0.01055	0.604075	yes	UP	N	N	N	Y	Y	9.67	26.39
ENSRNOG00000007369.L01	360848	Shisa4	shisa family member 4 [Source:RGD Symbol;Acc:1312041]	26	74.4	1.51	0.01055	0.604075	yes	UP	N	N	N	Y	Y	26.84	72.19
ENSRNOG00000046763.L01	684425	Adssl1	adenylosuccinate synthase like 1 [Source:RGD Symbol;Acc:1590342]	105	390	1.89	0.01055	0.604075	yes	UP	N	N	N	Y	Y	108.39	378.29
ENSRNOG00000006653.L01	170573	Slc38a4	solute carrier family 38, member 4 [Source:RGD Symbol;Acc:621836]	1.58	7.56	2.26	0.01065	0.604075	yes	UP	N	N	N	Y	Y	1.63	7.34
ENSRNOG00000015976	688682	Snrpn	small nuclear ribonucleoprotein polypeptide N [Source:RGD Symbol;Acc:621306]	11.3	36.8	1.71	0.01065	0.604075	yes	UP	N	N	N	Y	Y	11.63	35.75
ENSRNOG00000015904.L01	171112	Wfdc1	WAP four-disulfide core domain 1 [Source:RGD Symbol;Acc:68938]	3.03	15.1	2.31	0.01075	0.604075	yes	UP	N	N	N	Y	Y	3.13	14.64
ENSRNOG00000032375.L01	362701	Capn13	calpain 13 [Source:RGD Symbol;Acc:1562682]	7.18	24.8	1.79	0.0108	0.604075	yes	UP	N	N	N	Y	Y	7.4	24.04
ENSRNOG00000005697.L01	79213	Slc6a11	solute carrier family 6 (neurotransmitter transporter), member 11 [Source:RGD Symbol;Acc:628737]	0.229	2.38	3.37	0.01085	0.604075	yes	UP	N	N	N	Y	Y	0.24	2.31
ENSRNOG00000020251.L01	308873	Art1	ADP-ribosyltransferase 1 [Source:RGD Symbol;Acc:1304591]	65.9	229	1.8	0.0111	0.604075	yes	UP	N	N	N	Y	Y	67.98	222.69
ENSRNOG00000007905.L01	81008	Itga7	integrin, alpha 7 [Source:RGD Symbol;Acc:71022]	14.4	41.2	1.52	0.01115	0.604075	yes	UP	N	N	N	Y	Y	14.81	39.96
ENSRNOG00000013605.L01	691161	Sh2d6	SH2 domain containing 6 [Source:RGD Symbol;Acc:1587427]	14.3	46.7	1.71	0.0112	0.604075	yes	UP	N	N	N	Y	Y	14.75	45.28
ENSRNOG00000005798	29161	Cav3	caveolin 3 [Source:RGD Symbol;Acc:2281]	21.6	62.6	1.53	0.01135	0.604075	yes	UP	N	N	N	Y	Y	22.3	60.78
ENSRNOG00000018241.L01	306570	Ank1	ankyrin 1, erythrocytic [Source:RGD Symbol;Acc:1309620]	38.4	147	1.94	0.0116	0.604075	yes	UP	N	N	N	Y	Y	39.63	143.09
ENSRNOG00000006224	315833	Klhl31	kelch-like family member 31 [Source:RGD Symbol;Acc:1560540]	10.4	33.1	1.66	0.01195	0.604075	yes	UP	N	N	N	Y	Y	10.77	32.14
ENSRNOG00000002994.L01	360718	Popdc2	popeye domain containing 2 [Source:RGD Symbol;Acc:735226]	2.5	10.6	2.09	0.012	0.604075	yes	UP	N	N	N	Y	Y	2.58	10.32
ENSRNOG00000019213	60666	Gpd1	glycerol-3-phosphate dehydrogenase 1 (soluble) [Source:RGD Symbol;Acc:621381]	20.4	57.7	1.5	0.0121	0.604075	yes	UP	N	N	N	Y	Y	21.03	55.98
ENSRNOG00000021102.L01	29686	Scn1b	sodium channel, voltage-gated, type I, beta subunit [Source:RGD Symbol;Acc:3631]	102	377	1.88	0.01215	0.604075	yes	UP	N	N	N	Y	Y	105.5	365.9
ENSRNOG00000050675	688228	Myl4	myosin, light chain 4 [Source:RGD Symbol;Acc:1591197]	14.1	46.7	1.72	0.0124	0.604075	yes	UP	N	N	N	Y	Y	14.57	45.28
ENSRNOG00000048915	684352	Twf2	twinfilin actin-binding protein 2 [Source:RGD Symbol;Acc:1591460]	28.6	82.5	1.53	0.01255	0.604075	yes	UP	N	N	N	Y	Y	29.54	80.06
ENSRNOG00000014326.L01	140727	Cacng6	calcium channel, voltage-dependent, gamma subunit 6 [Source:RGD Symbol;Acc:628806]	3.34	13.8	2.05	0.01265	0.604075	yes	UP	N	N	N	Y	Y	3.44	13.38
ENSRNOG00000004878	25714	Myf6	myogenic factor 6 [Source:RGD Symbol;Acc:3134]	18	51.1	1.51	0.0128	0.604075	yes	UP	N	N	N	Y	Y	18.51	49.55
ENSRNOG00000032443.L01	500267	Lmod3	leiomodin 3 (fetal) [Source:RGD Symbol;Acc:1564924]	27.6	85.2	1.63	0.0128	0.604075	yes	UP	N	N	N	Y	Y	28.49	82.71
ENSRNOG00000004678.L01	498284	Itln1	intelectin 1 (galactofuranose binding) [Source:RGD Symbol;Acc:1561048]	119	373	1.65	0.01315	0.604075	yes	UP	N	N	N	Y	Y	122.63	361.95
ENSRNOG00000004005.L01	24245	Camk2b	calcium/calmodulin-dependent protein kinase II beta [Source:RGD Symbol;Acc:2262]	14.2	44.7	1.65	0.0132	0.604075	yes	UP	N	N	N	Y	Y	14.64	43.36
ENSRNOG00000015283.L01	313574	Nt5c1a	5'-nucleotidase, cytosolic IA [Source:RGD Symbol;Acc:1310908]	3.65	10.2	1.48	0.0132	0.604075	yes	UP	N	N	N	Y	Y	3.76	9.88
ENSRNOG00000025781.L01	309433	Sec31b	SEC31 homolog B (S. cerevisiae) [Source:RGD Symbol;Acc:1598329]	3.86	11	1.51	0.01325	0.604075	yes	UP	N	N	N	Y	Y	3.99	10.69
ENSRNOG00000024990.L01	499818	Ppp1r1c	protein phosphatase 1, regulatory (inhibitor) subunit 1C [Source:RGD Symbol;Acc:1562095]	0.828	4.91	2.57	0.01325	0.604075	yes	UP	N	N	N	Y	Y	0.85	4.77
ENSRNOG00000002917.L01	287060	Sec14l5	SEC14-like 5 (S. cerevisiae) [Source:RGD Symbol;Acc:1564638]	5.55	16.1	1.54	0.0134	0.604075	yes	UP	N	N	N	Y	Y	5.73	15.63
ENSRNOG00000026548	287411	Dhrs7c	dehydrogenase/reductase (SDR family) member 7C [Source:RGD Symbol;Acc:1306989]	78.4	239	1.6	0.0135	0.604075	yes	UP	N	N	N	Y	Y	80.9	231.58
ENSRNOG00000009686.L01	29171	Aqp7	aquaporin 7 [Source:RGD Symbol;Acc:2145]	0.835	8.76	3.39	0.0136	0.604075	yes	UP	N	N	N	Y	Y	0.86	8.51
ENSRNOG00000028356	361824	Chchd10	coiled-coil-helix-coiled-coil-helix domain containing 10 [Source:RGD Symbol;Acc:1359417]	276	932	1.76	0.01365	0.604075	yes	UP	N	N	N	Y	Y	284.58	904.56
ENSRNOG00000001711.L01	288025	Hrasls	HRAS-like suppressor [Source:RGD Symbol;Acc:1309485]	5.05	14.9	1.57	0.0137	0.604075	yes	UP	N	N	N	Y	Y	5.2	14.52
ENSRNOG00000019780	362018	Sypl2	synaptophysin-like 2 [Source:RGD Symbol;Acc:1309907]	23.2	71.5	1.62	0.0137	0.604075	yes	UP	N	N	N	Y	Y	23.92	69.42
ENSRNOG00000015972.L01	308637	Ano5	anoctamin 5 [Source:RGD Symbol;Acc:1564265]	3.35	9.63	1.52	0.01375	0.604075	yes	UP	N	N	N	Y	Y	3.46	9.35
ENSRNOG00000047321	360504	Hba2	hemoglobin, alpha 2 [Source:RGD Symbol;Acc:1359364]	223	643	1.53	0.01375	0.604075	yes	UP	N	N	N	Y	Y	229.92	623.54
ENSRNOG00000010068.L01	296635	Ppapdc3	phosphatidic acid phosphatase type 2 domain containing 3 [Source:RGD Symbol;Acc:1305821]	18.7	52.1	1.48	0.014	0.604075	yes	UP	N	N	N	Y	Y	19.29	50.53
ENSRNOG00000028756	192255	Ubc	ubiquitin C [Source:RGD Symbol;Acc:621244]	28	79.5	1.5	0.01405	0.604075	yes	UP	N	N	N	Y	Y	28.9	77.09
ENSRNOG00000016866.L02	63839	Fhl2	four and a half LIM domains 2 [Source:RGD Symbol;Acc:61963]	9.71	33.6	1.79	0.01415	0.604075	yes	UP	N	N	N	Y	Y	10.02	32.63
ENSRNOG00000019926.L01	58965	Ramp1	receptor (G protein-coupled) activity modifying protein 1 [Source:RGD Symbol;Acc:61870]	44.3	123	1.47	0.0142	0.604075	yes	UP	N	N	N	Y	Y	45.65	119.14
ENSRNOG00000048430.L01	304551	Myo18b	myosin XVIIIb [Source:RGD Symbol;Acc:1594542]	6.76	18.7	1.47	0.0142	0.604075	yes	UP	N	N	N	Y	Y	6.97	18.15
ENSRNOG00000021096.L01	308593	Tmem143	transmembrane protein 143 [Source:RGD Symbol;Acc:1305013]	6.87	20.8	1.6	0.0143	0.604075	yes	UP	N	N	N	Y	Y	7.08	20.16
ENSRNOG00000019404.L02	301073	Hhatl	hedgehog acyltransferase-like [Source:RGD Symbol;Acc:1311911]	39.8	133	1.74	0.01435	0.604075	yes	UP	N	N	N	Y	Y	41.01	128.59
ENSRNOG00000007882.L01	360958	Ablim2	actin binding LIM protein family, member 2 [Source:RGD Symbol;Acc:1303094]	5.28	16.2	1.61	0.01465	0.604075	yes	UP	N	N	N	Y	Y	5.45	15.69
ENSRNOG00000046231.L01	682930	Cacna1s	calcium channel, voltage-dependent, L type, alpha 1S subunit [Source:RGD Symbol;Acc:70983]	23.2	85.6	1.89	0.0148	0.604075	yes	UP	N	N	N	Y	Y	23.89	83.04
ENSRNOG00000010350.L01	140666	Rcan2	regulator of calcineurin 2 [Source:RGD Symbol;Acc:69198]	16.3	43.3	1.41	0.015	0.604075	yes	UP	N	N	N	Y	Y	16.81	42.03
ENSRNOG00000004197.L01	503446	Asb12	ankyrin repeat and SOCS box-containing 12 [Source:RGD Symbol;Acc:1561142]	9.78	31.4	1.68	0.0151	0.604075	yes	UP	N	N	N	Y	Y	10.08	30.45
ENSRNOG00000024931.L01	293698	Ccdc88b	coiled-coil domain containing 88B [Source:RGD Symbol;Acc:1311475]	0.926	3.79	2.03	0.0154	0.604075	yes	UP	N	N	N	Y	Y	0.96	3.68
ENSRNOG00000017842.L01	24768	Scnn1g	sodium channel, non-voltage-gated 1, gamma subunit [Source:RGD Symbol;Acc:3641]	1.3	5.53	2.09	0.01545	0.604075	yes	UP	N	N	N	Y	Y	1.34	5.37
ENSRNOG00000001425.L01	114203	Sh2b2	SH2B adaptor protein 2 [Source:RGD Symbol;Acc:69284]	1.45	6.78	2.22	0.01545	0.604075	yes	UP	N	N	N	Y	Y	1.5	6.58
ENSRNOG00000019278.L01	308779	Fsd2	fibronectin type III and SPRY domain containing 2 [Source:RGD Symbol;Acc:1305167]	7.63	22.7	1.57	0.0158	0.604075	yes	UP	N	N	N	Y	Y	7.86	22
ENSRNOG00000033793	497796	LOC497796	hypothetical protein LOC497796 [Source:RGD Symbol;Acc:2291887]	0	0.761	inf	0.01585	0.604075	yes	UP	N	N	N	Y	Y	0	0.74
ENSRNOG00000048428	100909538	LOC100909538	dual specificity protein phosphatase isoform MDSP-like [Source:RGD Symbol;Acc:6502867]	0	1.66	inf	0.01585	0.604075	yes	UP	N	N	N	Y	Y	0	1.61
ENSRNOG00000012443.L01	25413	Cpt2	carnitine palmitoyltransferase 2 [Source:RGD Symbol;Acc:2398]	23	60.4	1.4	0.0159	0.604075	yes	UP	N	N	N	Y	Y	23.67	58.67
ENSRNOG00000004273.L01	293618	Ifitm1	interferon induced transmembrane protein 1 [Source:RGD Symbol;Acc:1307601]	54.4	165	1.6	0.0159	0.604075	yes	UP	N	N	N	Y	Y	56.15	160.22
ENSRNOG00000017226	25139	Slc2a4	solute carrier family 2 (facilitated glucose transporter), member 4 [Source:RGD Symbol;Acc:2711]	45.7	139	1.6	0.016	0.604075	yes	UP	N	N	N	Y	Y	47.09	134.57
ENSRNOG00000026238	501007	RGD1562618	similar to RIKEN cDNA 6030419C18 gene [Source:RGD Symbol;Acc:1562618]	3.13	11.7	1.9	0.016	0.604075	yes	UP	N	N	N	Y	Y	3.23	11.33
ENSRNOG00000043350.L01	116653	Cap2	CAP, adenylate cyclase-associated protein, 2 (yeast) [Source:RGD Symbol;Acc:620310]	11.1	31.2	1.49	0.01615	0.604075	yes	UP	N	N	N	Y	Y	11.44	30.31
ENSRNOG00000021174	246233	Macrod1	MACRO domain containing 1 [Source:RGD Symbol;Acc:628701]	76.7	217	1.5	0.0163	0.604075	yes	UP	N	N	N	Y	Y	79.1	210.61
ENSRNOG00000007541	313582	Fhl3	four and a half LIM domains 3 [Source:RGD Symbol;Acc:1307180]	46	123	1.42	0.0166	0.604075	yes	UP	N	N	N	Y	Y	47.45	119.43
ENSRNOG00000008949.L01	305675	Synpo2l	synaptopodin 2-like [Source:RGD Symbol;Acc:1565434]	10.6	27.9	1.39	0.0167	0.604075	yes	UP	N	N	N	Y	Y	10.96	27.03
ENSRNOG00000015538.L01	84356	Abcd2	ATP-binding cassette, subfamily D (ALD), member 2 [Source:RGD Symbol;Acc:69244]	1.41	4.89	1.8	0.0169	0.604075	yes	UP	N	N	N	Y	Y	1.45	4.75
ENSRNOG00000019504.L01	361180	Grtp1	growth hormone regulated TBC protein 1 [Source:RGD Symbol;Acc:1309210]	17.3	77.2	2.16	0.017	0.604075	yes	UP	N	N	N	Y	Y	17.85	74.96
ENSRNOG00000006146	362708	Trim54	tripartite motif-containing 54 [Source:RGD Symbol;Acc:1306453]	67	193	1.53	0.017	0.604075	yes	UP	N	N	N	Y	Y	69.15	187.13
ENSRNOG00000013194.L01	117269	Rps6ka2	ribosomal protein S6 kinase polypeptide 2 [Source:RGD Symbol;Acc:620676]	6.37	17.1	1.43	0.01725	0.604075	yes	UP	N	N	N	Y	Y	6.57	16.6
ENSRNOG00000003441	367785	Asb9	ankyrin repeat and SOCS box-containing 9 [Source:RGD Symbol;Acc:1560537]	0	0.645	inf	0.01725	0.604075	yes	UP	N	N	N	Y	Y	0	0.63
ENSRNOG00000050924.L01	684516	Kcnc4	potassium voltage gated channel, Shaw-related subfamily, member 4 [Source:RGD Symbol;Acc:1589169]	4.43	13.3	1.58	0.01735	0.604075	yes	UP	N	N	N	Y	Y	4.57	12.9
ENSRNOG00000000610.L01	294362	Cisd1	CDGSH iron sulfur domain 1 [Source:RGD Symbol;Acc:1309529]	97.4	261	1.42	0.01785	0.61312	yes	UP	N	N	N	Y	Y	100.47	253.25
ENSRNOG00000036726.L01	690076	Cd300e	Cd300e molecule [Source:RGD Symbol;Acc:1585137]	0.289	2.77	3.26	0.0179	0.61312	yes	UP	N	N	N	Y	Y	0.3	2.69
ENSRNOG00000033517	100360791	LOC100360791	tumor protein, translationally-controlled 1 [Source:RGD Symbol;Acc:2321467]	2.43	13.1	2.43	0.018	0.61415	yes	UP	N	N	N	Y	Y	2.51	12.7
ENSRNOG00000004589.L01	362760	Galnt16	polypeptide N-acetylgalactosaminyltransferase 16 [Source:RGD Symbol;Acc:1310202]	2.98	8.8	1.56	0.01805	0.61415	yes	UP	N	N	N	Y	Y	3.08	8.54
ENSRNOG00000009761.L01	25566	Tmod1	tropomodulin 1 [Source:RGD Symbol;Acc:3874]	14.7	54.1	1.88	0.0181	0.61483	yes	UP	N	N	N	Y	Y	15.19	52.56
ENSRNOG00000016692.L01	313200	Hsdl2	hydroxysteroid dehydrogenase like 2 [Source:RGD Symbol;Acc:1305387]	25.3	69.5	1.46	0.01815	0.615507	yes	UP	N	N	N	Y	Y	26.07	67.48
ENSRNOG00000007314.L01	29440	Slc26a4	solute carrier family 26 (anion exchanger), member 4 [Source:RGD Symbol;Acc:3293]	1.25	5.99	2.26	0.01845	0.623616	yes	UP	N	N	N	Y	Y	1.29	5.81
ENSRNOG00000048862.L01	294696	Mrps36	mitochondrial ribosomal protein S36 [Source:RGD Symbol;Acc:1309315]	59.5	159	1.42	0.0188	0.630746	yes	UP	N	N	N	Y	Y	61.3	154.17
ENSRNOG00000024885.L01	499972	Asb10	ankyrin repeat and SOCS box-containing 10 [Source:RGD Symbol;Acc:1562922]	5.28	18.8	1.83	0.01885	0.630746	yes	UP	N	N	N	Y	Y	5.45	18.22
ENSRNOG00000008481.L01	362384	Reep1	receptor accessory protein 1 [Source:RGD Symbol;Acc:1305230]	5.67	15.7	1.47	0.0192	0.630746	yes	UP	N	N	N	Y	Y	5.84	15.2
ENSRNOG00000013000	24534	Ldhb	lactate dehydrogenase B [Source:RGD Symbol;Acc:2997]	169	608	1.85	0.01925	0.630746	yes	UP	N	N	N	Y	Y	174.19	589.88
ENSRNOG00000005286.L01	362735	Coch	cochlin [Source:RGD Symbol;Acc:1308536]	0	1.16	inf	0.0193	0.630746	yes	UP	N	N	N	Y	Y	0	1.12
ENSRNOG00000047102.L01	641520	Popdc3	popeye domain containing 3 [Source:RGD Symbol;Acc:1590760]	9.89	29.5	1.58	0.0193	0.630746	yes	UP	N	N	N	Y	Y	10.2	28.61
ENSRNOG00000016696.L01	89805	Angpt2	angiopoietin 2 [Source:RGD Symbol;Acc:621861]	0.922	11.8	3.68	0.0194	0.630746	yes	UP	N	N	N	Y	Y	0.95	11.43
ENSRNOG00000038686.L01	302671	Ap1s2	adaptor-related protein complex 1, sigma 2 subunit [Source:RGD Symbol;Acc:1561862]	10.6	28.5	1.42	0.0194	0.630746	yes	UP	N	N	N	Y	Y	10.94	27.64
ENSRNOG00000002459.L01	363790	Fbxo40	F-box protein 40 [Source:RGD Symbol;Acc:1309781]	7.94	21.7	1.45	0.01985	0.638285	yes	UP	N	N	N	Y	Y	8.18	21.07
ENSRNOG00000005053	54702	Egln3	egl-9 family hypoxia-inducible factor 3 [Source:RGD Symbol;Acc:71019]	12.8	33.6	1.39	0.01995	0.638494	yes	UP	N	N	N	Y	Y	13.22	32.58
ENSRNOG00000014522.L01	85239	Mlycd	malonyl-CoA decarboxylase [Source:RGD Symbol;Acc:620234]	23.2	58.3	1.33	0.01995	0.638494	yes	UP	N	N	N	Y	Y	23.94	56.6
ENSRNOG00000009565	89813	Pdk4	pyruvate dehydrogenase kinase, isozyme 4 [Source:RGD Symbol;Acc:69061]	49.6	220	2.15	0.02015	0.640889	yes	UP	N	N	N	Y	Y	51.18	213.32
ENSRNOG00000008210.L01	315962	Ky	kyphoscoliosis peptidase [Source:RGD Symbol;Acc:1305407]	11.5	32.4	1.5	0.02015	0.640889	yes	UP	N	N	N	Y	Y	11.86	31.49
ENSRNOG00000016917.L01	25688	Clcn1	chloride channel, voltage-sensitive 1 [Source:RGD Symbol;Acc:2360]	12	34.8	1.53	0.0204	0.644835	yes	UP	N	N	N	Y	Y	12.42	33.77
ENSRNOG00000022610.L01	308724	Agbl1	ATP/GTP binding protein-like 1 [Source:RGD Symbol;Acc:1560280]	3.32	9.01	1.44	0.02045	0.64501	yes	UP	N	N	N	Y	Y	3.43	8.75
ENSRNOG00000018145	311849	Crat	carnitine O-acetyltransferase [Source:RGD Symbol;Acc:1303031]	59.9	201	1.75	0.0205	0.64501	yes	UP	N	N	N	Y	Y	61.81	195.29
ENSRNOG00000018286	79557	Chrna1	cholinergic receptor, nicotinic, alpha 1 (muscle) [Source:RGD Symbol;Acc:69277]	2.72	11.5	2.08	0.02065	0.648733	yes	UP	N	N	N	Y	Y	2.81	11.16
ENSRNOG00000012478.L01	25546	Shox2	short stature homeobox 2 [Source:RGD Symbol;Acc:3674]	6.51	17.8	1.46	0.0209	0.652583	yes	UP	N	N	N	Y	Y	6.71	17.32
ENSRNOG00000009063	290370	Dnajc15	DnaJ (Hsp40) homolog, subfamily C, member 15 [Source:RGD Symbol;Acc:1307154]	37.8	97.6	1.37	0.0209	0.652583	yes	UP	N	N	N	Y	Y	38.95	94.72
ENSRNOG00000009889	24645	Pgm1	phosphoglucomutase 1 [Source:RGD Symbol;Acc:3316]	40.7	120	1.56	0.021	0.653713	yes	UP	N	N	N	Y	Y	42.01	116.7
ENSRNOG00000019303.L01	293854	Srpk3	SRSF protein kinase 3 [Source:RGD Symbol;Acc:727856]	15.2	39.5	1.38	0.0212	0.654962	yes	UP	N	N	N	Y	Y	15.65	38.34
ENSRNOG00000003973	304805	Cyb5r1	cytochrome b5 reductase 1 [Source:RGD Symbol;Acc:1306084]	30.8	80.7	1.39	0.0212	0.654962	yes	UP	N	N	N	Y	Y	31.72	78.28
ENSRNOG00000014867.L01	499702	Synpo2	synaptopodin 2 [Source:RGD Symbol;Acc:1564779]	14.7	39.1	1.41	0.0213	0.656625	yes	UP	N	N	N	Y	Y	15.12	37.93
ENSRNOG00000046918	363474	Apoo	apolipoprotein O [Source:RGD Symbol;Acc:1565289]	17.6	47.4	1.43	0.02135	0.656625	yes	UP	N	N	N	Y	Y	18.15	45.99
ENSRNOG00000019082.L01	113907	Sbk1	SH3 domain binding kinase 1 [Source:RGD Symbol;Acc:628713]	7.6	19	1.32	0.02145	0.658711	yes	UP	N	N	N	Y	Y	7.84	18.45
ENSRNOG00000005491.L01	314847	Best3	bestrophin 3 [Source:RGD Symbol;Acc:1305439]	1.06	3.17	1.59	0.02165	0.661876	yes	UP	N	N	N	Y	Y	1.09	3.08
ENSRNOG00000000165.L01	24638	Pfkfb1	6-phosphofructo-2-kinase/fructose-2,6-biphosphatase 1 [Source:RGD Symbol;Acc:3307]	8.7	27.3	1.65	0.0218	0.663576	yes	UP	N	N	N	Y	Y	8.97	26.52
ENSRNOG00000018602.L01	362665	Camta1	calmodulin binding transcription activator 1 [Source:EntrezGene;Acc:362665]	1.4	4.41	1.66	0.0219	0.663576	yes	UP	N	N	N	Y	Y	1.44	4.28
ENSRNOG00000018415	291135	Acot13	acyl-CoA thioesterase 13 [Source:RGD Symbol;Acc:1306513]	39.6	104	1.4	0.0221	0.663745	yes	UP	N	N	N	Y	Y	40.88	101.24
ENSRNOG00000013548	25545	Sepw1	selenoprotein W, 1 [Source:RGD Symbol;Acc:3661]	123	437	1.83	0.02215	0.664273	yes	UP	N	N	N	Y	Y	127.14	424.44
ENSRNOG00000012303	301226	Apobec2	apolipoprotein B mRNA editing enzyme, catalytic polypeptide-like 2 [Source:RGD Symbol;Acc:1308727]	157	501	1.67	0.0223	0.667794	yes	UP	N	N	N	Y	Y	162.31	485.7
ENSRNOG00000006741.L01	288907	Podnl1	podocan-like 1 [Source:RGD Symbol;Acc:1307753]	0.161	4.54	4.82	0.0228	0.67585	yes	UP	N	N	N	Y	Y	0.17	4.41
ENSRNOG00000020164.L01	293632	Ifitm10	interferon induced transmembrane protein 10 [Source:RGD Symbol;Acc:1563319]	3.24	12.2	1.92	0.0228	0.67585	yes	UP	N	N	N	Y	Y	3.34	11.87
ENSRNOG00000014498.L01	502859	Kbtbd12	kelch repeat and BTB (POZ) domain containing 12 [Source:RGD Symbol;Acc:1585999]	3.05	7.81	1.36	0.02345	0.684189	yes	UP	N	N	N	Y	Y	3.14	7.58
ENSRNOG00000020812	690987	Gys1	glycogen synthase 1, muscle [Source:RGD Symbol;Acc:1589798]	24.1	64.8	1.43	0.02345	0.684189	yes	UP	N	N	N	Y	Y	24.87	62.92
ENSRNOG00000046731.L01	25398	Cacna1a	calcium channel, voltage-dependent, P/Q type, alpha 1A subunit [Source:EntrezGene;Acc:25398]	4.7	12.3	1.39	0.0238	0.684189	yes	UP	N	N	N	Y	Y	4.85	11.98
ENSRNOG00000009974.L01	29309	Coq3	coenzyme Q3 methyltransferase [Source:RGD Symbol;Acc:2380]	25.2	61.7	1.29	0.0238	0.684189	yes	UP	N	N	N	Y	Y	26	59.91
ENSRNOG00000012134.L01	25722	Scn4a	sodium channel, voltage-gated, type IV, alpha subunit [Source:RGD Symbol;Acc:3636]	9.79	26	1.41	0.0239	0.684189	yes	UP	N	N	N	Y	Y	10.1	25.2
ENSRNOG00000023633.L01	25061	Crabp1	cellular retinoic acid binding protein 1 [Source:RGD Symbol;Acc:2400]	11.7	36.9	1.66	0.0242	0.685073	yes	UP	N	N	N	Y	Y	12.06	35.77
ENSRNOG00000030515.L01	116690	Nfasc	neurofascin [Source:RGD Symbol;Acc:620911]	0.341	1.31	1.94	0.0243	0.685073	yes	UP	N	N	N	Y	Y	0.35	1.27
ENSRNOG00000021294	29152	Mstn	myostatin [Source:RGD Symbol;Acc:3115]	9.24	23.8	1.36	0.02455	0.685073	yes	UP	N	N	N	Y	Y	9.52	23.09
ENSRNOG00000014787.L01	365194	Cabp5	calcium binding protein 5 [Source:RGD Symbol;Acc:1308108]	0.078	1.77	4.51	0.02465	0.685073	yes	UP	N	N	N	Y	Y	0.08	1.72
ENSRNOG00000018656.L01	25028	Ampd1	adenosine monophosphate deaminase 1 [Source:RGD Symbol;Acc:2109]	46.3	128	1.47	0.0247	0.685073	yes	UP	N	N	N	Y	Y	47.72	124.56
ENSRNOG00000017873	24769	Sct	secretin [Source:RGD Symbol;Acc:3643]	0	1.27	inf	0.02475	0.685073	yes	UP	N	N	N	Y	Y	0	1.23
ENSRNOG00000030817	293597	Olr292	olfactory receptor 292 [Source:RGD Symbol;Acc:1333185]	0	0.591	inf	0.02475	0.685073	yes	UP	N	N	N	Y	Y	0	0.57
ENSRNOG00000048698	683961	LOC683961	similar to ribosomal protein S13 [Source:RGD Symbol;Acc:1596535]	0	1.52	inf	0.02475	0.685073	yes	UP	N	N	N	Y	Y	0	1.48
ENSRNOG00000033803	100365214	LOC100360841	ribosomal protein L37-like [Source:RGD Symbol;Acc:2321317]	0	2.78	inf	0.02475	0.685073	yes	UP	N	N	N	Y	Y	0	2.69
ENSRNOG00000001182.L01	64539	Ndufv3	NADH dehydrogenase (ubiquinone) flavoprotein 3 [Source:RGD Symbol;Acc:621020]	32.1	116	1.85	0.0248	0.685531	yes	UP	N	N	N	Y	Y	33.07	112.16
ENSRNOG00000019451.L01	289734	Smtn	smoothelin [Source:RGD Symbol;Acc:1310216]	21.8	62	1.51	0.0251	0.688251	yes	UP	N	N	N	Y	Y	22.53	60.15
ENSRNOG00000012659	89818	Vamp5	vesicle-associated membrane protein 5 [Source:RGD Symbol;Acc:620419]	35.8	95.3	1.41	0.0252	0.689148	yes	UP	N	N	N	Y	Y	36.9	92.42
ENSRNOG00000030743	29148	Myog	myogenin [Source:RGD Symbol;Acc:620432]	4.79	14.2	1.57	0.02525	0.689594	yes	UP	N	N	N	Y	Y	4.94	13.78
ENSRNOG00000012827.L01	310483	Mlf1	myeloid leukemia factor 1 [Source:RGD Symbol;Acc:1306854]	65.2	173	1.4	0.0254	0.692287	yes	UP	N	N	N	Y	Y	67.23	167.49
ENSRNOG00000020376.L01	294025	Obfc1	oligonucleotide/oligosaccharide-binding fold containing 1 [Source:RGD Symbol;Acc:1305637]	13	37.4	1.52	0.02545	0.692287	yes	UP	N	N	N	Y	Y	13.43	36.32
ENSRNOG00000025691.L01	301265	Pla2g7	phospholipase A2, group VII (platelet-activating factor acetylhydrolase, plasma) [Source:RGD Symbol;Acc:1310734]	15.5	38.4	1.31	0.0257	0.696314	yes	UP	N	N	N	Y	Y	16.02	37.32
ENSRNOG00000046547.L01	690139	Rbm24	RNA binding motif protein 24 [Source:RGD Symbol;Acc:1584029]	17.1	42.2	1.3	0.0258	0.6981	yes	UP	N	N	N	Y	Y	17.63	40.96
ENSRNOG00000019758.L01	116458	Ipo13	importin 13 [Source:RGD Symbol;Acc:620071]	14	34.6	1.3	0.02615	0.701334	yes	UP	N	N	N	Y	Y	14.47	33.54
ENSRNOG00000001807.L01	500364	Sspn	sarcospan [Source:RGD Symbol;Acc:1559723]	10.6	26.2	1.31	0.0264	0.701334	yes	UP	N	N	N	Y	Y	10.94	25.46
ENSRNOG00000011074.L01	171519	Calcb	calcitonin-related polypeptide, beta [Source:RGD Symbol;Acc:620997]	13	34.4	1.41	0.0265	0.701334	yes	UP	N	N	N	Y	Y	13.37	33.35
ENSRNOG00000002139.L01	289568	RGD1311575	hypothetical LOC289568 [Source:RGD Symbol;Acc:1311575]	0.778	2.61	1.75	0.02685	0.701334	yes	UP	N	N	N	Y	Y	0.8	2.53
ENSRNOG00000009864.L01	362039	Pla2g12a	phospholipase A2, group XIIA [Source:RGD Symbol;Acc:1304662]	29.7	75.2	1.34	0.0272	0.701334	yes	UP	N	N	N	Y	Y	30.63	72.97
ENSRNOG00000028238.L01	498066	Sh3bgr	SH3 domain binding glutamate-rich protein [Source:RGD Symbol;Acc:1563599]	127	374	1.56	0.0272	0.701334	yes	UP	N	N	N	Y	Y	131.12	363.17
ENSRNOG00000038074	498555	LOC498555	similar to 60S acidic ribosomal protein P2 [Source:RGD Symbol;Acc:1590791]	108	274	1.35	0.0272	0.701334	yes	UP	N	N	N	Y	Y	111.03	265.68
ENSRNOG00000000860.L01	309611	Vwa7	von Willebrand factor A domain containing 7 [Source:RGD Symbol;Acc:1303137]	3.07	11.1	1.86	0.0275	0.701334	yes	UP	N	N	N	Y	Y	3.16	10.78
ENSRNOG00000021229	24221	Avp	arginine vasopressin [Source:RGD Symbol;Acc:2184]	0	0.921	inf	0.0276	0.701334	yes	UP	N	N	N	Y	Y	0	0.89
ENSRNOG00000018624	364883	Cdx1	caudal type homeo box 1 [Source:RGD Symbol;Acc:621233]	0	0.589	inf	0.0276	0.701334	yes	UP	N	N	N	Y	Y	0	0.57
ENSRNOG00000050067	100364509	LOC100364509	ribosomal protein S9-like [Source:RGD Symbol;Acc:2320851]	0	0.786	inf	0.0276	0.701334	yes	UP	N	N	N	Y	Y	0	0.76
ENSRNOG00000003283.L01	360872	Rcsd1	RCSD domain containing 1 [Source:RGD Symbol;Acc:1304715]	11.3	27.9	1.31	0.02775	0.701732	yes	UP	N	N	N	Y	Y	11.62	27.03
ENSRNOG00000017429.L01	81511	Lat	linker for activation of T cells [Source:RGD Symbol;Acc:620802]	2.85	10.6	1.9	0.0279	0.702922	yes	UP	N	N	N	Y	Y	2.94	10.32
ENSRNOG00000037673	100362069	RGD1565183	similar to ribosomal protein L28 [Source:RGD Symbol;Acc:1565183]	4.16	26.9	2.69	0.02805	0.704967	yes	UP	N	N	N	Y	Y	4.29	26.06
ENSRNOG00000008236	117543	Decr1	2,4-dienoyl CoA reductase 1, mitochondrial [Source:RGD Symbol;Acc:70999]	57.9	139	1.27	0.02815	0.705748	yes	UP	N	N	N	Y	Y	59.7	135.13
ENSRNOG00000002827.L01	302920	Rbfox1	RNA binding protein, fox-1 homolog (C. elegans) 1 [Source:RGD Symbol;Acc:1311210]	22.7	62.9	1.47	0.02815	0.705748	yes	UP	N	N	N	Y	Y	23.41	61.13
ENSRNOG00000004901.L01	298805	Slc4a1ap	solute carrier family 4 (anion exchanger), member 1, adaptor protein [Source:RGD Symbol;Acc:1307080]	44.1	135	1.62	0.0284	0.708547	yes	UP	N	N	N	Y	Y	45.42	131.49
ENSRNOG00000016952.L01	690848	LOC686442	similar to ubiquinol-cytochrome c reductase subunit [Source:RGD Symbol;Acc:1597642]	376	964	1.36	0.0286	0.710077	yes	UP	N	N	N	Y	Y	387.69	935.46
ENSRNOG00000016543.L01	140939	Trim63	tripartite motif containing 63, E3 ubiquitin protein ligase [Source:RGD Symbol;Acc:619964]	22.1	68.5	1.63	0.02865	0.710458	yes	UP	N	N	N	Y	Y	22.78	66.44
ENSRNOG00000012852.L01	117028	Bin1	bridging integrator 1 [Source:RGD Symbol;Acc:621786]	57	171	1.59	0.02885	0.711011	yes	UP	N	N	N	Y	Y	58.8	166.1
ENSRNOG00000025300.L01	314997	Fer1l6	fer-1-like family member 6 [Source:RGD Symbol;Acc:1564703]	1.37	5.28	1.94	0.02885	0.711011	yes	UP	N	N	N	Y	Y	1.41	5.13
ENSRNOG00000042653	690871	LOC690871	hypothetical protein LOC690871 [Source:RGD Symbol;Acc:1590963]	102	248	1.28	0.0289	0.711011	yes	UP	N	N	N	Y	Y	105.45	240.7
ENSRNOG00000020288	117035	Slc25a20	solute carrier family 25 (carnitine/acylcarnitine translocase), member 20 [Source:RGD Symbol;Acc:621443]	34.1	83.1	1.28	0.02895	0.711011	yes	UP	N	N	N	Y	Y	35.19	80.69
ENSRNOG00000030238.L01	260327	Fndc5	fibronectin type III domain containing 5 [Source:RGD Symbol;Acc:708525]	13.6	38.1	1.49	0.02895	0.711011	yes	UP	N	N	N	Y	Y	13.98	36.96
ENSRNOG00000019565.L01	295315	Tbx15	T-box 15 [Source:RGD Symbol;Acc:1308094]	22.7	64.9	1.51	0.02905	0.712612	yes	UP	N	N	N	Y	Y	23.43	63
ENSRNOG00000021856.L01	317676	Lat2	linker for activation of T cells family, member 2 [Source:RGD Symbol;Acc:631397]	1.2	4.47	1.9	0.0294	0.719475	yes	UP	N	N	N	Y	Y	1.23	4.34
ENSRNOG00000042419	364224	Acyp2	acylphosphatase 2, muscle type [Source:RGD Symbol;Acc:1595836]	57.3	140	1.29	0.02945	0.719838	yes	UP	N	N	N	Y	Y	59.04	136.05
ENSRNOG00000008243.L01	311168	Slc43a1	solute carrier family 43 (amino acid system L transporter), member 1 [Source:RGD Symbol;Acc:1308229]	2.38	7.92	1.74	0.02965	0.723001	yes	UP	N	N	N	Y	Y	2.45	7.68
ENSRNOG00000027024.L01	360857	Rgs16	regulator of G-protein signaling 16 [Source:RGD Symbol;Acc:1589741]	1.06	3.9	1.87	0.02985	0.724428	yes	UP	N	N	N	Y	Y	1.1	3.79
ENSRNOG00000049766.L01	81779	Sctr	secretin receptor [Source:RGD Symbol;Acc:621342]	0.253	2.62	3.37	0.03005	0.726699	yes	UP	N	N	N	Y	Y	0.26	2.54
ENSRNOG00000008027.L01	313225	Murc	muscle-related coiled-coil protein [Source:RGD Symbol;Acc:1310395]	15.4	37	1.26	0.03005	0.726699	yes	UP	N	N	N	Y	Y	15.9	35.92
ENSRNOG00000021567	500036	Ppp1r3a	protein phosphatase 1, regulatory subunit 3A [Source:RGD Symbol;Acc:1561312]	7.94	20.1	1.34	0.0302	0.729465	yes	UP	N	N	N	Y	Y	8.19	19.52
ENSRNOG00000026419	499277	RGD1560958	similar to RIKEN cDNA 1700063I17 [Source:RGD Symbol;Acc:1560958]	0	0.854	inf	0.0303	0.730159	yes	UP	N	N	N	Y	Y	0	0.83
ENSRNOG00000031287.L01	306243	Cacna2d3	calcium channel, voltage-dependent, alpha2/delta subunit 3 [Source:RGD Symbol;Acc:631361]	2.56	7.37	1.53	0.03045	0.732051	yes	UP	N	N	N	Y	Y	2.64	7.15
ENSRNOG00000017188.L01	301517	Cyp27a1	cytochrome P450, family 27, subfamily a, polypeptide 1 [Source:RGD Symbol;Acc:727915]	15.9	38.2	1.27	0.0305	0.732393	yes	UP	N	N	N	Y	Y	16.38	37.05
ENSRNOG00000012658.L01	114108	Pdlim3	PDZ and LIM domain 3 [Source:RGD Symbol;Acc:620427]	95.9	272	1.51	0.0306	0.73256	yes	UP	N	N	N	Y	Y	98.85	264.37
ENSRNOG00000048767.L01	498519	Mcpt10	mast cell protease 10 [Source:RGD Symbol;Acc:3063]	5.52	20	1.86	0.03065	0.73256	yes	UP	N	N	N	Y	Y	5.7	19.45
ENSRNOG00000017248.L01	301518	Prkag3	protein kinase, AMP-activated, gamma 3 non-catalytic subunit [Source:RGD Symbol;Acc:1308698]	4.75	12.5	1.39	0.031	0.735774	yes	UP	N	N	N	Y	Y	4.9	12.09
ENSRNOG00000011633	362973	Parvb	parvin, beta [Source:RGD Symbol;Acc:1311485]	12.5	30.2	1.27	0.031	0.735774	yes	UP	N	N	N	Y	Y	12.93	29.32
ENSRNOG00000013653.L01	286908	Pdlim7	PDZ and LIM domain 7 [Source:RGD Symbol;Acc:628769]	67.3	230	1.77	0.0312	0.739664	yes	UP	N	N	N	Y	Y	69.39	222.65
ENSRNOG00000011541.L01	170520	Cygb	cytoglobin [Source:RGD Symbol;Acc:69415]	2.82	8.18	1.54	0.03135	0.741504	yes	UP	N	N	N	Y	Y	2.91	7.93
ENSRNOG00000003063.L01	64561	Phka1	phosphorylase kinase, alpha 1 [Source:RGD Symbol;Acc:621522]	9.82	23.7	1.27	0.03165	0.746015	yes	UP	N	N	N	Y	Y	10.13	23
ENSRNOG00000033567.L01	81725	Musk	muscle, skeletal, receptor tyrosine kinase [Source:RGD Symbol;Acc:3211]	0.526	2.05	1.96	0.03195	0.749407	yes	UP	N	N	N	Y	Y	0.54	1.99
ENSRNOG00000023389.L01	289440	Ephx4	epoxide hydrolase 4 [Source:RGD Symbol;Acc:1308891]	2.89	12.2	2.08	0.03205	0.749407	yes	UP	N	N	N	Y	Y	2.98	11.88
ENSRNOG00000007235.L01	689961	Atp5g1	ATP synthase, H+ transporting, mitochondrial Fo complex, subunit C1 (subunit 9) [Source:RGD Symbol;Acc:61933]	345	966	1.49	0.0322	0.752055	yes	UP	N	N	N	Y	Y	355.82	937.95
ENSRNOG00000018736	100911615	Pnpla2	patatin-like phospholipase domain containing 2 [Source:RGD Symbol;Acc:1309044]	18	43	1.25	0.0325	0.756474	yes	UP	N	N	N	Y	Y	18.61	41.77
ENSRNOG00000009276.L01	295105	Schip1	schwannomin interacting protein 1 [Source:RGD Symbol;Acc:1309962]	11.6	29.3	1.34	0.03255	0.756778	yes	UP	N	N	N	Y	Y	11.94	28.41
ENSRNOG00000009538	295143	Etfdh	electron-transferring-flavoprotein dehydrogenase [Source:RGD Symbol;Acc:735052]	27.5	69.2	1.33	0.0327	0.758544	yes	UP	N	N	N	Y	Y	28.32	67.19
ENSRNOG00000040122	498440	Myoz1	myozenin 1 [Source:RGD Symbol;Acc:1561064]	211	798	1.92	0.03275	0.758844	yes	UP	N	N	N	Y	Y	217.91	774.58
ENSRNOG00000023352.L01	499776	Fam78a	family with sequence similarity 78, member A [Source:RGD Symbol;Acc:1566351]	1.83	5.24	1.52	0.03285	0.760301	yes	UP	N	N	N	Y	Y	1.89	5.08
ENSRNOG00000029571.L02	362810	Coq10a	coenzyme Q10 homolog A (S. cerevisiae) [Source:RGD Symbol;Acc:1562447]	57.5	160	1.47	0.03295	0.760336	yes	UP	N	N	N	Y	Y	59.27	154.86
ENSRNOG00000014078	293991	Ndufb8	NADH dehydrogenase (ubiquinone) 1 beta subcomplex 8 [Source:RGD Symbol;Acc:1309129]	247	707	1.52	0.033	0.760336	yes	UP	N	N	N	Y	Y	255.03	686.17
ENSRNOG00000037446.L01	29533	Pxmp2	peroxisomal membrane protein 2 [Source:RGD Symbol;Acc:61812]	20.6	54.9	1.41	0.0331	0.760929	yes	UP	N	N	N	Y	Y	21.23	53.26
ENSRNOG00000009421	24513	Ivd	isovaleryl-CoA dehydrogenase [Source:RGD Symbol;Acc:2936]	54.3	135	1.31	0.0334	0.766105	yes	UP	N	N	N	Y	Y	55.97	130.67
ENSRNOG00000017646.L01	361424	RGD1309651	similar to 1190005I06Rik protein [Source:RGD Symbol;Acc:1309651]	3.17	13.6	2.11	0.03385	0.766132	yes	UP	N	N	N	Y	Y	3.27	13.23
ENSRNOG00000007407	100910710	Ndufa12	NADH dehydrogenase (ubiquinone) 1 alpha subcomplex, 12 [Source:RGD Symbol;Acc:1311462]	255	658	1.37	0.034	0.766424	yes	UP	N	N	N	Y	Y	263.52	639
ENSRNOG00000018651.L01	290986	Agtpbp1	ATP/GTP binding protein 1 [Source:RGD Symbol;Acc:1306307]	9.23	22.2	1.27	0.03405	0.766424	yes	UP	N	N	N	Y	Y	9.52	21.55
ENSRNOG00000017983.L01	362087	Ubac1	UBA domain containing 1 [Source:RGD Symbol;Acc:1359542]	28.6	69.8	1.29	0.03425	0.768393	yes	UP	N	N	N	Y	Y	29.53	67.67
ENSRNOG00000021101.L01	29744	Sema6c	sema domain, transmembrane domain (TM), and cytoplasmic domain, (semaphorin) 6C [Source:RGD Symbol;Acc:3659]	9.64	24	1.32	0.0344	0.770914	yes	UP	N	N	N	Y	Y	9.94	23.27
ENSRNOG00000042320	363985	Slc41a1	solute carrier family 41 (magnesium transporter), member 1 [Source:RGD Symbol;Acc:1311397]	13.2	31.8	1.27	0.03445	0.771191	yes	UP	N	N	N	Y	Y	13.62	30.91
ENSRNOG00000021130.L01	25559	Abcc8	ATP-binding cassette, subfamily C (CFTR/MRP), member 8 [Source:RGD Symbol;Acc:3786]	0.472	1.97	2.07	0.0348	0.774706	yes	UP	N	N	N	Y	Y	0.49	1.92
ENSRNOG00000012249.L01	308622	Txlnb	taxilin beta [Source:RGD Symbol;Acc:1307979]	21.5	56.4	1.39	0.03485	0.774706	yes	UP	N	N	N	Y	Y	22.17	54.72
ENSRNOG00000016190.L01	498909	Coq9	coenzyme Q9 [Source:RGD Symbol;Acc:1586040]	73	206	1.5	0.0349	0.774706	yes	UP	N	N	N	Y	Y	75.26	199.93
ENSRNOG00000025909	361805	Uqcc2	ubiquinol-cytochrome c reductase complex assembly factor 2 [Source:RGD Symbol;Acc:1306917]	104	250	1.26	0.03505	0.774706	yes	UP	N	N	N	Y	Y	107.48	242.58
ENSRNOG00000045821.L01	641603	Slc41a3	solute carrier family 41, member 3 [Source:RGD Symbol;Acc:1589573]	7.21	18.5	1.36	0.03505	0.774706	yes	UP	N	N	N	Y	Y	7.43	18
ENSRNOG00000013112.L01	100909469	Dusp13	dual specificity phosphatase 13 [Source:RGD Symbol;Acc:1359712]	20.8	56.8	1.45	0.0351	0.774706	yes	UP	N	N	N	Y	Y	21.44	55.11
ENSRNOG00000024508.L01	690326	LOC690326	hypothetical protein LOC690326 [Source:RGD Symbol;Acc:1597362]	0	0.776	inf	0.0352	0.774706	yes	UP	N	N	N	Y	Y	0	0.75
ENSRNOG00000009928.L01	29711	Bckdhb	branched chain keto acid dehydrogenase E1, beta polypeptide [Source:RGD Symbol;Acc:2197]	40.8	95.1	1.22	0.03525	0.774706	yes	UP	N	N	N	Y	Y	42.05	92.36
ENSRNOG00000007999	286965	Abra	actin-binding Rho activating protein [Source:RGD Symbol;Acc:708493]	23.4	55.8	1.25	0.03525	0.774706	yes	UP	N	N	N	Y	Y	24.15	54.09
ENSRNOG00000008933	297694	Plbd1	phospholipase B domain containing 1 [Source:RGD Symbol;Acc:1308734]	9.25	22.9	1.3	0.0355	0.777697	yes	UP	N	N	N	Y	Y	9.54	22.19
ENSRNOG00000000701	288740	Iscu	iron-sulfur cluster assembly enzyme [Source:RGD Symbol;Acc:1309562]	57	133	1.22	0.03565	0.779316	yes	UP	N	N	N	Y	Y	58.8	129.08
ENSRNOG00000018604	293481	Tufm	Tu translation elongation factor, mitochondrial [Source:RGD Symbol;Acc:1305501]	43.3	105	1.28	0.0364	0.786978	yes	UP	N	N	N	Y	Y	44.69	101.83
ENSRNOG00000024580.L01	691041	Mamstr	MEF2 activating motif and SAP domain containing transcriptional regulator [Source:RGD Symbol;Acc:1588652]	4.31	13.1	1.61	0.0365	0.786978	yes	UP	N	N	N	Y	Y	4.45	12.76
ENSRNOG00000015290	100911515	Tpi1	triosephosphate isomerase 1 [Source:RGD Symbol;Acc:3896]	123	372	1.6	0.0365	0.786978	yes	UP	N	N	N	Y	Y	126.77	360.75
ENSRNOG00000015318.L02	313575	Heyl	hes-related family bHLH transcription factor with YRPW motif-like [Source:RGD Symbol;Acc:1305022]	2.35	8.58	1.87	0.037	0.794511	yes	UP	N	N	N	Y	Y	2.43	8.32
ENSRNOG00000037815.L01	304500	Acad10	acyl-CoA dehydrogenase family, member 10 [Source:RGD Symbol;Acc:1310159]	9.88	22.6	1.2	0.03735	0.794511	yes	UP	N	N	N	Y	Y	10.19	21.96
ENSRNOG00000005369.L01	50599	Kcnj3	potassium inwardly-rectifying channel, subfamily J, member 3 [Source:RGD Symbol;Acc:2958]	0.217	2.14	3.3	0.03785	0.794511	yes	UP	N	N	N	Y	Y	0.22	2.08
ENSRNOG00000048673.L01	114247	Slfn3	schlafen 3 [Source:RGD Symbol;Acc:620455]	2.18	5.63	1.37	0.0381	0.794511	yes	UP	N	N	N	Y	Y	2.24	5.47
ENSRNOG00000010540.L01	287656	Mrpl45	mitochondrial ribosomal protein L45 [Source:RGD Symbol;Acc:1304913]	16.8	39.8	1.25	0.03815	0.794511	yes	UP	N	N	N	Y	Y	17.31	38.66
ENSRNOG00000012422.L01	294917	Tnik	TRAF2 and NCK interacting kinase [Source:RGD Symbol;Acc:1561817]	2.03	4.89	1.27	0.0383	0.794511	yes	UP	N	N	N	Y	Y	2.09	4.75
ENSRNOG00000030688	301033	Lrrc2	leucine rich repeat containing 2 [Source:RGD Symbol;Acc:1311716]	5.36	13.8	1.37	0.03835	0.794511	yes	UP	N	N	N	Y	Y	5.52	13.43
ENSRNOG00000028945	501129	Tmem182	transmembrane protein 182 [Source:RGD Symbol;Acc:1563696]	23.4	53.9	1.21	0.0386	0.794511	yes	UP	N	N	N	Y	Y	24.09	52.35
ENSRNOG00000013368	301173	Plcl2	phospholipase C-like 2 [Source:RGD Symbol;Acc:1305941]	1.95	5.49	1.5	0.039	0.796674	yes	UP	N	N	N	Y	Y	2.01	5.33
ENSRNOG00000015588.L01	85383	Nol3	nucleolar protein 3 (apoptosis repressor with CARD domain) [Source:RGD Symbol;Acc:708558]	30.9	71.9	1.22	0.03905	0.796674	yes	UP	N	N	N	Y	Y	31.85	69.74
ENSRNOG00000007113.L01	289785	Myo1g	myosin IG [Source:RGD Symbol;Acc:1306016]	0.612	2.75	2.17	0.03905	0.796674	yes	UP	N	N	N	Y	Y	0.63	2.67
ENSRNOG00000028047.L01	29470	Mecr	mitochondrial trans-2-enoyl-CoA reductase [Source:RGD Symbol;Acc:3208]	6.35	17.8	1.49	0.03915	0.79792	yes	UP	N	N	N	Y	Y	6.55	17.3
ENSRNOG00000008966.L01	312907	Slco5a1	solute carrier organic anion transporter family, member 5A1 [Source:RGD Symbol;Acc:1307132]	2.08	5.05	1.28	0.0392	0.798145	yes	UP	N	N	N	Y	Y	2.14	4.9
ENSRNOG00000014723.L01	361431	Cbfa2t3	core-binding factor, runt domain, alpha subunit 2; translocated to, 3 [Source:RGD Symbol;Acc:1310547]	4.27	10.6	1.31	0.03945	0.801641	yes	UP	N	N	N	Y	Y	4.4	10.27
ENSRNOG00000023452.L01	691354	LOC691354	hypothetical protein LOC691354 [Source:RGD Symbol;Acc:1585063]	4.05	10.9	1.43	0.03965	0.80411	yes	UP	N	N	N	Y	Y	4.17	10.56
ENSRNOG00000012966	25287	Acadl	acyl-CoA dehydrogenase, long chain [Source:RGD Symbol;Acc:2011]	107	315	1.56	0.0397	0.804327	yes	UP	N	N	N	Y	Y	110.35	305.66
ENSRNOG00000048797.L01	25350	Sftpd	surfactant protein D [Source:RGD Symbol;Acc:3667]	41	101	1.3	0.03985	0.805773	yes	UP	N	N	N	Y	Y	42.26	97.65
ENSRNOG00000014576.L01	315992	Dock3	dedicator of cyto-kinesis 3 [Source:RGD Symbol;Acc:1306677]	0.204	0.945	2.21	0.03995	0.806099	yes	UP	N	N	N	Y	Y	0.21	0.92
ENSRNOG00000002135.L01	680229	Sgcb	sarcoglycan, beta (dystrophin-associated glycoprotein) [Source:RGD Symbol;Acc:1594202]	15.1	36	1.25	0.04015	0.806099	yes	UP	N	N	N	Y	Y	15.59	35
ENSRNOG00000049437	58920	Gpc1	glypican 1 [Source:RGD Symbol;Acc:61853]	34.4	89.4	1.38	0.04045	0.806099	yes	UP	N	N	N	Y	Y	35.47	86.71
ENSRNOG00000015117.L01	691307	Lrrc39	leucine rich repeat containing 39 [Source:RGD Symbol;Acc:1585106]	12.9	34.9	1.43	0.04055	0.806099	yes	UP	N	N	N	Y	Y	13.35	33.84
ENSRNOG00000020165	293522	Ahsp	alpha hemoglobin stabilizing protein [Source:RGD Symbol;Acc:1306725]	0	0.722	inf	0.0408	0.806099	yes	UP	N	N	N	Y	Y	0	0.7
ENSRNOG00000020733	316010	Camp	cathelicidin antimicrobial peptide [Source:RGD Symbol;Acc:1559878]	0	0.633	inf	0.0408	0.806099	yes	UP	N	N	N	Y	Y	0	0.61
ENSRNOG00000018405	680551	Apoc4	apolipoprotein C-IV [Source:RGD Symbol;Acc:70959]	0	0.811	inf	0.0408	0.806099	yes	UP	N	N	N	Y	Y	0	0.79
ENSRNOG00000031848	100360344	LOC100360344	hypothetical protein LOC100360344 [Source:RGD Symbol;Acc:2322309]	0	1.03	inf	0.0408	0.806099	yes	UP	N	N	N	Y	Y	0	1
ENSRNOG00000030107	100362298	LOC100362298	ribosomal protein S18-like [Source:RGD Symbol;Acc:2318487]	0	0.941	inf	0.0408	0.806099	yes	UP	N	N	N	Y	Y	0	0.91
ENSRNOG00000049848	100365794	RGD1562469	similar to ribosomal protein L21 [Source:RGD Symbol;Acc:1562469]	0	0.955	inf	0.0408	0.806099	yes	UP	N	N	N	Y	Y	0	0.93
ENSRNOG00000007040	54311	Timm17a	translocase of inner mitochondrial membrane 17 homolog A (yeast) [Source:RGD Symbol;Acc:3862]	74	171	1.21	0.04085	0.806099	yes	UP	N	N	N	Y	Y	76.28	166.22
ENSRNOG00000011145.L01	64680	Crhr2	corticotropin releasing hormone receptor 2 [Source:RGD Symbol;Acc:70547]	8.08	18.7	1.21	0.04085	0.806099	yes	UP	N	N	N	Y	Y	8.33	18.14
ENSRNOG00000012175.L01	311658	Nfatc2	nuclear factor of activated T-cells, cytoplasmic, calcineurin-dependent 2 [Source:RGD Symbol;Acc:1307690]	4.02	9.94	1.31	0.0409	0.806309	yes	UP	N	N	N	Y	Y	4.14	9.65
ENSRNOG00000011659.L01	365298	Alpk3	alpha-kinase 3 [Source:RGD Symbol;Acc:1309860]	16.1	46.6	1.53	0.0411	0.807919	yes	UP	N	N	N	Y	Y	16.6	45.2
ENSRNOG00000032204	685596	Uqcrb	ubiquinol-cytochrome c reductase binding protein [Source:RGD Symbol;Acc:1311971]	51.7	128	1.31	0.0422	0.820677	yes	UP	N	N	N	Y	Y	53.33	124.11
ENSRNOG00000009715.L01	24552	Me1	malic enzyme 1, NADP(+)-dependent, cytosolic [Source:RGD Symbol;Acc:3074]	16.9	39.6	1.23	0.04225	0.820677	yes	UP	N	N	N	Y	Y	17.46	38.45
ENSRNOG00000048564	100364427	LOC100364427	ribosomal protein S12-like [Source:RGD Symbol;Acc:2321033]	1.47	26.3	4.16	0.0423	0.820677	yes	UP	N	N	N	Y	Y	1.51	25.48
ENSRNOG00000024539	297990	Ndufb6	NADH dehydrogenase (ubiquinone) 1 beta subcomplex, 6 [Source:RGD Symbol;Acc:1311354]	108	248	1.2	0.04235	0.820677	yes	UP	N	N	N	Y	Y	111.09	240.51
ENSRNOG00000026930	362440	Ndufa9	NADH dehydrogenase (ubiquinone) 1 alpha subcomplex, 9 [Source:RGD Symbol;Acc:1307307]	111	284	1.35	0.04245	0.821837	yes	UP	N	N	N	Y	Y	114.74	275.8
ENSRNOG00000017932.L01	64442	St3gal2	ST3 beta-galactoside alpha-2,3-sialyltransferase 2 [Source:RGD Symbol;Acc:68413]	6.57	16.2	1.3	0.0427	0.822015	yes	UP	N	N	N	Y	Y	6.77	15.75
ENSRNOG00000014327.L01	117505	Csrp3	cysteine and glycine-rich protein 3 (cardiac LIM protein) [Source:RGD Symbol;Acc:71092]	156	394	1.33	0.0427	0.822015	yes	UP	N	N	N	Y	Y	161.25	382.01
ENSRNOG00000003954.L01	140924	Il2rg	interleukin 2 receptor, gamma [Source:RGD Symbol;Acc:621466]	2.85	10.7	1.91	0.0427	0.822015	yes	UP	N	N	N	Y	Y	2.94	10.35
ENSRNOG00000045733.L01	298139	LOC298139	similar to RIKEN cDNA 2310003M01 [Source:RGD Symbol;Acc:1359584]	34.2	85.4	1.32	0.04285	0.823355	yes	UP	N	N	N	Y	Y	35.24	82.9
ENSRNOG00000011438.L01	100912884	Sftpa1	surfactant protein A1 [Source:RGD Symbol;Acc:3665]	2.1	7.23	1.79	0.0433	0.828118	yes	UP	N	N	N	Y	Y	2.16	7.02
ENSRNOG00000011825	100361144	LOC100361144	NADH dehydrogenase (ubiquinone) 1 beta subcomplex 3-like [Source:RGD Symbol;Acc:2320717]	215	548	1.35	0.04345	0.828622	yes	UP	N	N	N	Y	Y	222.17	531.87
ENSRNOG00000004720.L01	29712	Kcnj2	potassium inwardly-rectifying channel, subfamily J, member 2 [Source:RGD Symbol;Acc:61968]	10.4	23.8	1.19	0.04355	0.828622	yes	UP	N	N	N	Y	Y	10.75	23.09
ENSRNOG00000020607	25244	Bckdha	branched chain ketoacid dehydrogenase E1, alpha polypeptide [Source:RGD Symbol;Acc:2196]	53.2	127	1.25	0.04365	0.828622	yes	UP	N	N	N	Y	Y	54.83	123
ENSRNOG00000001431.L01	288589	Rasa4	RAS p21 protein activator 4 [Source:RGD Symbol;Acc:1565457]	11.5	26.5	1.21	0.04365	0.828622	yes	UP	N	N	N	Y	Y	11.82	25.71
ENSRNOG00000029784.L01	29431	Pak1	p21 protein (Cdc42/Rac)-activated kinase 1 [Source:RGD Symbol;Acc:3250]	2.33	6.46	1.47	0.0438	0.828939	yes	UP	N	N	N	Y	Y	2.4	6.27
ENSRNOG00000016983.L01	29557	Myh7	myosin, heavy chain 7, cardiac muscle, beta [Source:RGD Symbol;Acc:62030]	0.0676	0.766	3.5	0.0438	0.828939	yes	UP	N	N	N	Y	Y	0.07	0.74
ENSRNOG00000001873.L01	25041	P2rx6	purinergic receptor P2X, ligand-gated ion channel, 6 [Source:RGD Symbol;Acc:3243]	7.32	18.5	1.34	0.04385	0.828939	yes	UP	N	N	N	Y	Y	7.55	17.94
ENSRNOG00000027791	688386	Cox7a2	cytochrome c oxidase subunit VIIa polypeptide 2 [Source:RGD Symbol;Acc:68365]	141	323	1.2	0.0439	0.828939	yes	UP	N	N	N	Y	Y	145.19	313.47
ENSRNOG00000003895.L01	54289	Rgs1	regulator of G-protein signaling 1 [Source:RGD Symbol;Acc:3561]	1.19	5.22	2.13	0.044	0.829119	yes	UP	N	N	N	Y	Y	1.23	5.07
ENSRNOG00000020955	24585	Myl3	myosin, light chain 3, alkali; ventricular, skeletal, slow [Source:RGD Symbol;Acc:3142]	4.52	15.3	1.76	0.04405	0.829252	yes	UP	N	N	N	Y	Y	4.66	14.86
ENSRNOG00000005615	25112	Gadd45a	growth arrest and DNA-damage-inducible, alpha [Source:RGD Symbol;Acc:2654]	23.9	55	1.2	0.0441	0.829252	yes	UP	N	N	N	Y	Y	24.66	53.35
ENSRNOG00000020602	100911483	Ndufa13	NADH dehydrogenase (ubiquinone) 1 alpha subcomplex, 13 [Source:RGD Symbol;Acc:1565358]	310	740	1.25	0.0442	0.829252	yes	UP	N	N	N	Y	Y	320.25	717.91
ENSRNOG00000020105	316624	Klhl30	kelch-like family member 30 [Source:RGD Symbol;Acc:1309644]	3.28	8.93	1.45	0.04425	0.829252	yes	UP	N	N	N	Y	Y	3.38	8.67
ENSRNOG00000005269.L01	302948	Srl	sarcalumenin [Source:RGD Symbol;Acc:1306564]	42.1	125	1.57	0.0444	0.831303	yes	UP	N	N	N	Y	Y	43.42	120.99
ENSRNOG00000019850.L01	363256	Speg	SPEG complex locus [Source:RGD Symbol;Acc:2124]	9.44	24.6	1.38	0.0445	0.832414	yes	UP	N	N	N	Y	Y	9.73	23.9
ENSRNOG00000002860	360867	Ccdc181	coiled-coil domain containing 181 [Source:RGD Symbol;Acc:1309708]	19.6	43.9	1.16	0.04465	0.833286	yes	UP	N	N	N	Y	Y	20.19	42.55
ENSRNOG00000000536.L01	309659	Mdga1	MAM domain containing glycosylphosphatidylinositol anchor 1 [Source:RGD Symbol;Acc:1307031]	0.808	2.31	1.52	0.04475	0.833286	yes	UP	N	N	N	Y	Y	0.83	2.25
ENSRNOG00000016553.L01	313653	Vwa5b1	von Willebrand factor A domain containing 5B1 [Source:RGD Symbol;Acc:1308559]	0.08	0.93	3.54	0.04535	0.840803	yes	UP	N	N	N	Y	Y	0.08	0.9
ENSRNOG00000005614	79462	Txn2	thioredoxin 2 [Source:RGD Symbol;Acc:71040]	85.6	207	1.27	0.0454	0.840803	yes	UP	N	N	N	Y	Y	88.32	201.03
ENSRNOG00000024309.L01	688869	Cox6b1	cytochrome c oxidase subunit VIb polypeptide 1 [Source:RGD Symbol;Acc:1584097]	118	269	1.19	0.04545	0.840969	yes	UP	N	N	N	Y	Y	121.97	261.2
ENSRNOG00000016327	293829	Mcee	methylmalonyl CoA epimerase [Source:RGD Symbol;Acc:1309966]	29	69.1	1.25	0.04555	0.842058	yes	UP	N	N	N	Y	Y	29.87	67.04
ENSRNOG00000048476	500560	RGD1562484	similar to mitochondrial ATP synthase coupling factor 6 [Source:RGD Symbol;Acc:1562484]	23.8	69	1.54	0.0461	0.849318	yes	UP	N	N	N	Y	Y	24.53	67.02
ENSRNOG00000008279.L01	298517	Mrps15	mitochondrial ribosomal protein S15 [Source:RGD Symbol;Acc:1359675]	22.2	51.2	1.2	0.04615	0.849318	yes	UP	N	N	N	Y	Y	22.92	49.66
ENSRNOG00000013128.L01	314472	Tmem179	transmembrane protein 179 [Source:RGD Symbol;Acc:1310269]	0.522	3.01	2.53	0.04615	0.849318	yes	UP	N	N	N	Y	Y	0.54	2.92
ENSRNOG00000007137.L01	246138	Ly6i	lymphocyte antigen 6 complex, locus I [Source:RGD Symbol;Acc:628818]	0.317	8.47	4.74	0.0462	0.849475	yes	UP	N	N	N	Y	Y	0.33	8.23
ENSRNOG00000019205.L01	84470	Gnpat	glyceronephosphate O-acyltransferase [Source:RGD Symbol;Acc:620179]	24.5	55	1.17	0.04645	0.850255	yes	UP	N	N	N	Y	Y	25.24	53.41
ENSRNOG00000019745.L01	171009	Actn3	actinin alpha 3 [Source:RGD Symbol;Acc:621792]	62.6	190	1.6	0.04645	0.850255	yes	UP	N	N	N	Y	Y	64.57	183.86
ENSRNOG00000012723.L01	365751	Trim55	tripartite motif-containing 55 [Source:RGD Symbol;Acc:1306943]	9.55	24.9	1.39	0.04675	0.852246	yes	UP	N	N	N	Y	Y	9.85	24.23
ENSRNOG00000029886	25632	Hba1	hemoglobin, alpha 1 [Source:RGD Symbol;Acc:2782]	413	1100	1.41	0.04685	0.852246	yes	UP	N	N	N	Y	Y	426.35	1068
ENSRNOG00000034075	679949	Ube2ql1	ubiquitin-conjugating enzyme E2Q family-like 1 [Source:RGD Symbol;Acc:1598121]	0.457	2.36	2.37	0.0469	0.852398	yes	UP	N	N	N	Y	Y	0.47	2.29
ENSRNOG00000004532.L01	362090	Fam69b	family with sequence similarity 69, member B [Source:RGD Symbol;Acc:1308600]	4.66	12.7	1.45	0.04695	0.85255	yes	UP	N	N	N	Y	Y	4.81	12.35
ENSRNOG00000001055.L01	304469	Rilpl1	Rab interacting lysosomal protein-like 1 [Source:RGD Symbol;Acc:1307973]	40.4	145	1.84	0.04745	0.856316	yes	UP	N	N	N	Y	Y	41.71	140.39
ENSRNOG00000010666.L01	29576	Wisp2	WNT1 inducible signaling pathway protein 2 [Source:RGD Symbol;Acc:621867]	3.7	10.8	1.55	0.04785	0.859747	yes	UP	N	N	N	Y	Y	3.82	10.49
ENSRNOG00000008329	299310	Ndufb11	NADH dehydrogenase (ubiquinone) 1 beta subcomplex, 11 [Source:RGD Symbol;Acc:1563698]	192	477	1.31	0.04785	0.859747	yes	UP	N	N	N	Y	Y	197.98	462.6
ENSRNOG00000013564.L01	306760	Dok3	docking protein 3 [Source:RGD Symbol;Acc:1311840]	0.723	3.49	2.27	0.04785	0.859747	yes	UP	N	N	N	Y	Y	0.75	3.39
ENSRNOG00000028208.L01	497916	Mief2	mitochondrial elongation factor 2 [Source:RGD Symbol;Acc:1560728]	18.6	42.8	1.2	0.048	0.860932	yes	UP	N	N	N	Y	Y	19.22	41.57
ENSRNOG00000009197.L01	500017	Asb4	ankyrin repeat and SOCS box-containing 4 [Source:RGD Symbol;Acc:1563114]	0.2	1.13	2.49	0.0482	0.863008	yes	UP	N	N	N	Y	Y	0.21	1.09
ENSRNOG00000028856.L01	680549	Pknox2	PBX/knotted 1 homeobox 2 [Source:RGD Symbol;Acc:1590611]	3.01	9.37	1.64	0.04835	0.863709	yes	UP	N	N	N	Y	Y	3.11	9.09
ENSRNOG00000004980	287419	Rangrf	RAN guanine nucleotide release factor [Source:RGD Symbol;Acc:1563195]	46.3	127	1.46	0.04845	0.863709	yes	UP	N	N	N	Y	Y	47.8	123.44
ENSRNOG00000004245.L01	289197	Mgst3	microsomal glutathione S-transferase 3 [Source:RGD Symbol;Acc:1306373]	141	308	1.13	0.04845	0.863709	yes	UP	N	N	N	Y	Y	145.32	298.51
ENSRNOG00000032994.L01	313625	Myom3	myomesin 3 [Source:RGD Symbol;Acc:1310060]	28.3	81.5	1.53	0.04845	0.863709	yes	UP	N	N	N	Y	Y	29.2	79.11
ENSRNOG00000005668.L01	296658	Ndufa8	NADH dehydrogenase (ubiquinone) 1 alpha subcomplex, 8 [Source:RGD Symbol;Acc:1306283]	126	278	1.14	0.0486	0.865504	yes	UP	N	N	N	Y	Y	129.95	269.26
ENSRNOG00000001276.L01	309692	Pcnt	pericentrin [Source:RGD Symbol;Acc:1595865]	9.09	21.3	1.23	0.04865	0.865504	yes	UP	N	N	N	Y	Y	9.38	20.66
ENSRNOG00000010798.L01	364403	Blk	BLK proto-oncogene, Src family tyrosine kinase [Source:RGD Symbol;Acc:1308859]	0.521	2.69	2.37	0.04875	0.865504	yes	UP	N	N	N	Y	Y	0.54	2.61
ENSRNOG00000007475.L01	300027	Gpihbp1	glycosylphosphatidylinositol anchored high density lipoprotein binding protein 1 [Source:RGD Symbol;Acc:1564237]	3.73	13.5	1.86	0.04885	0.865504	yes	UP	N	N	N	Y	Y	3.84	13.1
ENSRNOG00000036659.L01	498034	Fn3k	fructosamine 3 kinase [Source:RGD Symbol;Acc:1559983]	10.5	26.8	1.36	0.04895	0.865504	yes	UP	N	N	N	Y	Y	10.79	25.98
ENSRNOG00000004768.L01	299766	Myf5	myogenic factor 5 [Source:RGD Symbol;Acc:1308322]	1.19	4.67	1.97	0.04905	0.865504	yes	UP	N	N	N	Y	Y	1.23	4.54
ENSRNOG00000019823	100910944	LOC100910944	reactive oxygen species modulator 1-like [Source:RGD Symbol;Acc:6496011]	126	282	1.17	0.0491	0.865504	yes	UP	N	N	N	Y	Y	129.66	273.69
ENSRNOG00000022691.L01	364901	St8sia5	ST8 alpha-N-acetyl-neuraminide alpha-2,8-sialyltransferase 5 [Source:RGD Symbol;Acc:1302934]	0.659	3.31	2.33	0.04915	0.86564	yes	UP	N	N	N	Y	Y	0.68	3.21
ENSRNOG00000005659.L01	114592	Aurkb	aurora kinase B [Source:RGD Symbol;Acc:621625]	37.1	101	1.44	0.04925	0.866588	yes	UP	N	N	N	Y	Y	38.31	98.07
ENSRNOG00000016962.L01	29204	Neu2	sialidase 2 [Source:RGD Symbol;Acc:3164]	3.73	10.8	1.54	0.04935	0.866588	yes	UP	N	N	N	Y	Y	3.84	10.52
ENSRNOG00000012095.L01	114906	Pkia	protein kinase (cAMP-dependent, catalytic) inhibitor alpha [Source:RGD Symbol;Acc:621021]	27.3	68.9	1.33	0.0495	0.866588	yes	UP	N	N	N	Y	Y	28.18	66.94
ENSRNOG00000011912.L01	306327	Tmem38a	transmembrane protein 38a [Source:RGD Symbol;Acc:1307901]	111	382	1.78	0.0495	0.866588	yes	UP	N	N	N	Y	Y	114.68	370.81
ENSRNOG00000007668.L01	366949	Mafa	v-maf avian musculoaponeurotic fibrosarcoma oncogene A [Source:RGD Symbol;Acc:1562627]	5.28	12.6	1.25	0.0495	0.866588	yes	UP	N	N	N	Y	Y	5.45	12.21
ENSRNOG00000047118.L01	683897	LOC683897	similar to Protein C6orf203 [Source:RGD Symbol;Acc:1597785]	25.5	57	1.16	0.0495	0.866588	yes	UP	N	N	N	Y	Y	26.33	55.27
ENSRNOG00000010576.L01	298496	Kcnq4	potassium voltage-gated channel, KQT-like subfamily, member 4 [Source:RGD Symbol;Acc:61799]	5.63	13.7	1.28	0.0499	0.869874	yes	UP	N	N	N	Y	Y	5.81	13.3
ENSRNOG00000010092.L01	317379	Magix	MAGI family member, X-linked [Source:RGD Symbol;Acc:1549729]	3.29	8.97	1.45	0.0499	0.869874	yes	UP	N	N	N	Y	Y	3.39	8.7

## Sheet: DEG4 Y5-8 vs O5-8
GeneAcc	EntrezGeneID	GeneName	Desc	Value_1	Value_2	log2fc	p-value	q-value	DEG:PV=0.05:SELECT	DEG:UP_DOWN	DEG:QV<=0.05	DEG:QV<=0.10	DEG:PV<=0.01	DEG:PV<=0.05	DEG:FC2>=0	EXP:Y5-8:FPKM	EXP:O5-8:FPKM
ENSRNOG00000004575.L01	24493	Il1a	interleukin 1 alpha [Source:RGD Symbol;Acc:2890]	0.766	0	#NAME?	5e-05	0.0262427	yes	DOWN	Y	Y	Y	Y	Y	0.73	0
ENSRNOG00000005003.L01	29714	Ptprn2	protein tyrosine phosphatase, receptor type, N polypeptide 2 [Source:RGD Symbol;Acc:61904]	20.7	3.02	-2.77	5e-05	0.0262427	yes	DOWN	Y	Y	Y	Y	Y	19.71	3.18
ENSRNOG00000028992.L01	58968	Acan	aggrecan [Source:RGD Symbol;Acc:68358]	6.25	0.615	-3.35	5e-05	0.0262427	yes	DOWN	Y	Y	Y	Y	Y	5.96	0.65
ENSRNOG00000039906.L01	65270	Gbgt1	globoside alpha-1,3-N-acetylgalactosaminyltransferase 1 [Source:RGD Symbol;Acc:628609]	20.3	2.63	-2.95	5e-05	0.0262427	yes	DOWN	Y	Y	Y	Y	Y	19.37	2.76
ENSRNOG00000012176.L01	84590	Rab27b	RAB27B, member RAS oncogene family [Source:RGD Symbol;Acc:620114]	17.1	5.39	-1.67	5e-05	0.0262427	yes	DOWN	Y	Y	Y	Y	Y	16.35	5.66
ENSRNOG00000033162	113901	Chia	chitinase, acidic [Source:RGD Symbol;Acc:1303058]	87.3	7.95	-3.46	5e-05	0.0262427	yes	DOWN	Y	Y	Y	Y	Y	83.23	8.36
ENSRNOG00000001162	116592	Tff2	trefoil factor 2 [Source:RGD Symbol;Acc:620709]	962	35.3	-4.77	5e-05	0.0262427	yes	DOWN	Y	Y	Y	Y	Y	916.91	37.12
ENSRNOG00000008422.L01	287610	Lpo	lactoperoxidase [Source:RGD Symbol;Acc:1310051]	220	37.7	-2.54	5e-05	0.0262427	yes	DOWN	Y	Y	Y	Y	Y	209.67	39.62
ENSRNOG00000016853.L01	291755	Dsg1	desmoglein 1 [Source:RGD Symbol;Acc:1309925]	9.36	0.841	-3.48	5e-05	0.0262427	yes	DOWN	Y	Y	Y	Y	Y	8.93	0.88
ENSRNOG00000015477.L01	305999	Nkx3-1	NK3 homeobox 1 [Source:RGD Symbol;Acc:1305369]	34	3.16	-3.42	5e-05	0.0262427	yes	DOWN	Y	Y	Y	Y	Y	32.41	3.32
ENSRNOG00000017514.L01	306956	Btn1a1	butyrophilin, subfamily 1, member A1 [Source:RGD Symbol;Acc:1306984]	13.5	1.71	-2.98	5e-05	0.0262427	yes	DOWN	Y	Y	Y	Y	Y	12.88	1.8
ENSRNOG00000016953.L01	307838	Chst4	carbohydrate (N-acetylglucosamine 6-O) sulfotransferase 4 [Source:RGD Symbol;Acc:1310798]	34.6	2.11	-4.04	5e-05	0.0262427	yes	DOWN	Y	Y	Y	Y	Y	33	2.22
ENSRNOG00000015222.L01	310721	Fam46c	family with sequence similarity 46, member C [Source:RGD Symbol;Acc:1359446]	37.3	10.5	-1.83	5e-05	0.0262427	yes	DOWN	Y	Y	Y	Y	Y	35.55	10.99
ENSRNOG00000032404.L01	360243	Top2a	topoisomerase (DNA) II alpha [Source:RGD Symbol;Acc:62048]	8.05	2.09	-1.94	5e-05	0.0262427	yes	DOWN	Y	Y	Y	Y	Y	7.68	2.2
ENSRNOG00000007183	100911252	LOC100360977	TRIMCyp-like [Source:RGD Symbol;Acc:2321083]	120	19.9	-2.59	5e-05	0.0262427	yes	DOWN	Y	Y	Y	Y	Y	114.58	20.93
ENSRNOG00000002006	64565	Tmprss11d	transmembrane protease, serine 11d [Source:RGD Symbol;Acc:620654]	0.69	0	#NAME?	0.00015	0.0632912	yes	DOWN	N	Y	Y	Y	Y	0.66	0
ENSRNOG00000027847.L01	100363350	Nxpe2	neurexophilin and PC-esterase domain family, member 2 [Source:RGD Symbol;Acc:2323193]	32.8	4.42	-2.89	0.00015	0.0632912	yes	DOWN	N	Y	Y	Y	Y	31.29	4.65
ENSRNOG00000022282	25412	Col2a1	collagen, type II, alpha 1 [Source:RGD Symbol;Acc:2375]	7.26	0.402	-4.17	0.0002	0.0755053	yes	DOWN	N	Y	Y	Y	Y	6.92	0.42
ENSRNOG00000002460.L01	60325	Serpinb2	serpin peptidase inhibitor, clade B (ovalbumin), member 2 [Source:RGD Symbol;Acc:621823]	36.2	10.3	-1.81	0.0002	0.0755053	yes	DOWN	N	Y	Y	Y	Y	34.51	10.86
ENSRNOG00000004678.L01	498284	Itln1	intelectin 1 (galactofuranose binding) [Source:RGD Symbol;Acc:1561048]	129	1.21	-6.73	0.0002	0.0755053	yes	DOWN	N	Y	Y	Y	Y	122.63	1.27
ENSRNOG00000012037.L01	29750	Galnt7	polypeptide N-acetylgalactosaminyltransferase 7 [Source:RGD Symbol;Acc:620362]	67.9	21.7	-1.65	0.00025	0.0867702	yes	DOWN	N	Y	Y	Y	Y	64.73	22.77
ENSRNOG00000009629.L01	54231	Car2	carbonic anhydrase 2 [Source:RGD Symbol;Acc:2240]	46.8	11.8	-1.98	0.00025	0.0867702	yes	DOWN	N	Y	Y	Y	Y	44.68	12.44
ENSRNOG00000012067	499322	Fam111a	family with sequence similarity 111, member A [Source:RGD Symbol;Acc:1560913]	29.1	9.76	-1.58	0.00025	0.0867702	yes	DOWN	N	Y	Y	Y	Y	27.78	10.25
ENSRNOG00000007839.L01	29735	Slc16a7	solute carrier family 16 (monocarboxylate transporter), member 7 [Source:RGD Symbol;Acc:3691]	11.9	2.61	-2.19	0.0003	0.0978136	yes	DOWN	N	Y	Y	Y	Y	11.31	2.74
ENSRNOG00000017159.L01	307563	Dsc3	desmocollin 3 [Source:RGD Symbol;Acc:1311782]	14.4	4.56	-1.66	0.0003	0.0978136	yes	DOWN	N	Y	Y	Y	Y	13.77	4.79
ENSRNOG00000006642.L01	363476	Yipf6	Yip1 domain family, member 6 [Source:RGD Symbol;Acc:1566154]	33	11.1	-1.57	0.0003	0.0978136	yes	DOWN	N	Y	Y	Y	Y	31.45	11.64
ENSRNOG00000023148.L01	25654	Col11a1	collagen, type XI, alpha 1 [Source:RGD Symbol;Acc:2372]	2	0.196	-3.35	0.00035	0.109154	yes	DOWN	N	N	Y	Y	Y	1.91	0.21
ENSRNOG00000006096	297910	Slc26a7	solute carrier family 26 (anion exchanger), member 7 [Source:RGD Symbol;Acc:1310846]	0.569	0	#NAME?	0.00035	0.109154	yes	DOWN	N	N	Y	Y	Y	0.54	0
ENSRNOG00000005023.L01	298961	Agr2	anterior gradient 2 [Source:RGD Symbol;Acc:1304606]	497	173	-1.52	0.0004	0.11955	yes	DOWN	N	N	Y	Y	Y	474.26	181.57
ENSRNOG00000011460.L01	292947	RGD1309903	similar to mKIAA1244 protein [Source:RGD Symbol;Acc:1309903]	2.96	0.652	-2.18	0.00045	0.130859	yes	DOWN	N	N	Y	Y	Y	2.82	0.68
ENSRNOG00000010085.L01	290485	Cldn10	claudin 10 [Source:RGD Symbol;Acc:1308027]	65.7	22.9	-1.52	0.0005	0.141572	yes	DOWN	N	N	Y	Y	Y	62.71	24.09
ENSRNOG00000002417.L01	266775	Serpinb10	serpin peptidase inhibitor, clade B (ovalbumin), member 10 [Source:RGD Symbol;Acc:628853]	56.8	17.8	-1.68	0.00055	0.146117	yes	DOWN	N	N	Y	Y	Y	54.23	18.67
ENSRNOG00000014070.L01	287699	Krt13	keratin 13 [Source:RGD Symbol;Acc:1302937]	426	146	-1.55	0.00055	0.146117	yes	DOWN	N	N	Y	Y	Y	406.31	153.1
ENSRNOG00000006867.L01	362733	Etv1	ets variant 1 [Source:RGD Symbol;Acc:1312007]	48.9	17.5	-1.48	0.00065	0.155415	yes	DOWN	N	N	Y	Y	Y	46.62	18.41
ENSRNOG00000004626.L01	84395	Slc34a2	solute carrier family 34 (type II sodium/phosphate contransporter), member 2 [Source:RGD Symbol;Acc:620889]	6.45	1.45	-2.16	0.0007	0.165531	yes	DOWN	N	N	Y	Y	Y	6.16	1.52
ENSRNOG00000025164	25334	Bhlha15	basic helix-loop-helix family, member a15 [Source:RGD Symbol;Acc:3091]	30.2	10.9	-1.47	0.00085	0.172428	yes	DOWN	N	N	Y	Y	Y	28.76	11.44
ENSRNOG00000001962.L01	304050	Fam3b	family with sequence similarity 3, member B [Source:RGD Symbol;Acc:1311662]	36.1	10.2	-1.82	0.00105	0.172428	yes	DOWN	N	N	Y	Y	Y	34.44	10.72
ENSRNOG00000017431.L01	307907	RGD1304884	similar to RIKEN cDNA 6430548M08 [Source:RGD Symbol;Acc:1304884]	35.2	13.3	-1.4	0.00105	0.172428	yes	DOWN	N	N	Y	Y	Y	33.53	13.98
ENSRNOG00000025332.L01	363104	Cd109	CD109 molecule [Source:RGD Symbol;Acc:1311287]	8.16	2.05	-1.99	0.00105	0.172428	yes	DOWN	N	N	Y	Y	Y	7.78	2.16
ENSRNOG00000005291.L01	170567	Slc38a1	solute carrier family 38, member 1 [Source:RGD Symbol;Acc:69645]	12.6	4.77	-1.4	0.0011	0.172428	yes	DOWN	N	N	Y	Y	Y	12.05	5.02
ENSRNOG00000045801	296504	Abo2	histo-blood group ABO system transferase 2 [Source:RGD Symbol;Acc:1311152]	0.614	0	#NAME?	0.0011	0.172428	yes	DOWN	N	N	Y	Y	Y	0.59	0
ENSRNOG00000012197.L01	296290	Bpifb2	BPI fold containing family B, member 2 [Source:RGD Symbol;Acc:1310866]	917	221	-2.06	0.00115	0.172428	yes	DOWN	N	N	Y	Y	Y	874.7	231.71
ENSRNOG00000014617.L01	192152	Tgoln2	trans-golgi network protein 2 [Source:RGD Symbol;Acc:620445]	126	42.7	-1.56	0.0012	0.172428	yes	DOWN	N	N	Y	Y	Y	120.1	44.87
ENSRNOG00000003183	64507	Fmod	fibromodulin [Source:RGD Symbol;Acc:619769]	12.3	3.34	-1.88	0.00125	0.172428	yes	DOWN	N	N	Y	Y	Y	11.73	3.51
ENSRNOG00000002227.L01	64030	Kit	v-kit Hardy-Zuckerman 4 feline sarcoma viral oncogene homolog [Source:RGD Symbol;Acc:620568]	17.4	6.92	-1.33	0.0013	0.177055	yes	DOWN	N	N	Y	Y	Y	16.63	7.28
ENSRNOG00000019999.L01	60378	Lypd3	Ly6/Plaur domain containing 3 [Source:RGD Symbol;Acc:69053]	85.8	35	-1.29	0.0014	0.186581	yes	DOWN	N	N	Y	Y	Y	81.78	36.81
ENSRNOG00000006803	295690	Dnajc10	DnaJ (Hsp40) homolog, subfamily C, member 10 [Source:RGD Symbol;Acc:1307813]	84.5	31.9	-1.41	0.0014	0.186581	yes	DOWN	N	N	Y	Y	Y	80.66	33.48
ENSRNOG00000007030.L01	171287	Epha7	Eph receptor A7 [Source:RGD Symbol;Acc:70957]	9.2	3.37	-1.45	0.0016	0.196745	yes	DOWN	N	N	Y	Y	Y	8.78	3.55
ENSRNOG00000012821.L01	81512	Lect1	leukocyte cell derived chemotaxin 1 [Source:RGD Symbol;Acc:620176]	9.55	1.07	-3.15	0.0017	0.20437	yes	DOWN	N	N	Y	Y	Y	9.11	1.13
ENSRNOG00000020578.L01	81613	Ceacam1	carcinoembryonic antigen-related cell adhesion molecule 1 (biliary glycoprotein) [Source:RGD Symbol;Acc:67396]	22.5	8.57	-1.39	0.0017	0.20437	yes	DOWN	N	N	Y	Y	Y	21.46	9.01
ENSRNOG00000003745.L01	25389	Atf3	activating transcription factor 3 [Source:RGD Symbol;Acc:2165]	27.4	9.58	-1.51	0.00175	0.206913	yes	DOWN	N	N	Y	Y	Y	26.09	10.07
ENSRNOG00000011160.L01	117556	Sv2b	synaptic vesicle glycoprotein 2b [Source:RGD Symbol;Acc:619716]	3.69	0.391	-3.24	0.00185	0.214033	yes	DOWN	N	N	Y	Y	Y	3.52	0.41
ENSRNOG00000018507.L01	297417	Gfpt1	glutamine fructose-6-phosphate transaminase 1 [Source:RGD Symbol;Acc:1549703]	76	28.1	-1.44	0.00195	0.224396	yes	DOWN	N	N	Y	Y	Y	72.53	29.48
ENSRNOG00000016552.L01	29637	Hmgcs1	3-hydroxy-3-methylglutaryl-CoA synthase 1 (soluble) [Source:RGD Symbol;Acc:70970]	28.7	11.7	-1.3	0.00215	0.240968	yes	DOWN	N	N	Y	Y	Y	27.36	12.26
ENSRNOG00000009345	50555	Ugt8	UDP glycosyltransferase 8 [Source:RGD Symbol;Acc:3938]	10.8	3.05	-1.83	0.00215	0.240968	yes	DOWN	N	N	Y	Y	Y	10.33	3.2
ENSRNOG00000018485.L01	311730	Gpr155	G protein-coupled receptor 155 [Source:RGD Symbol;Acc:1309162]	44.9	18.6	-1.27	0.00215	0.240968	yes	DOWN	N	N	Y	Y	Y	42.81	19.49
ENSRNOG00000022353.L01	292848	Klk13	kallikrein related-peptidase 13 [Source:RGD Symbol;Acc:1309337]	7.05	0.704	-3.32	0.0023	0.255122	yes	DOWN	N	N	Y	Y	Y	6.72	0.74
ENSRNOG00000007657.L01	298101	Col27a1	collagen, type XXVII, alpha 1 [Source:RGD Symbol;Acc:735115]	11.3	4.42	-1.36	0.0023	0.255122	yes	DOWN	N	N	Y	Y	Y	10.81	4.64
ENSRNOG00000011763.L01	80881	Serp1	stress-associated endoplasmic reticulum protein 1 [Source:RGD Symbol;Acc:620790]	171	59.6	-1.52	0.00255	0.279967	yes	DOWN	N	N	Y	Y	Y	162.8	62.62
ENSRNOG00000013304	29221	Arg1	arginase 1 [Source:RGD Symbol;Acc:2150]	83	34.3	-1.27	0.00265	0.288007	yes	DOWN	N	N	Y	Y	Y	79.21	36.08
ENSRNOG00000043445.L01	361993	Them5	thioesterase superfamily member 5 [Source:RGD Symbol;Acc:1562059]	44.8	12.7	-1.81	0.0027	0.290507	yes	DOWN	N	N	Y	Y	Y	42.73	13.39
ENSRNOG00000026371	287702	Krt17	keratin 17 [Source:RGD Symbol;Acc:1303181]	85.3	34.5	-1.31	0.0028	0.295359	yes	DOWN	N	N	Y	Y	Y	81.34	36.24
ENSRNOG00000017369	290553	Mustn1	musculoskeletal, embryonic nuclear protein 1 [Source:RGD Symbol;Acc:727804]	90.9	37.6	-1.27	0.0028	0.295359	yes	DOWN	N	N	Y	Y	Y	86.68	39.48
ENSRNOG00000026244.L01	292755	Nccrp1	non-specific cytotoxic cell receptor protein 1 homolog (zebrafish) [Source:RGD Symbol;Acc:1305932]	14.7	4.51	-1.71	0.0029	0.301474	yes	DOWN	N	N	Y	Y	Y	14.02	4.74
ENSRNOG00000000321	25145	Cd24	CD24 molecule [Source:RGD Symbol;Acc:2298]	285	105	-1.44	0.00305	0.312538	yes	DOWN	N	N	Y	Y	Y	272.06	110.6
ENSRNOG00000013443.L01	309475	Tm9sf3	transmembrane 9 superfamily member 3 [Source:RGD Symbol;Acc:1564625]	154	55.1	-1.48	0.00305	0.312538	yes	DOWN	N	N	Y	Y	Y	146.54	57.85
ENSRNOG00000013213	316539	Epha4	Eph receptor A4 [Source:RGD Symbol;Acc:1560587]	6.82	2.52	-1.43	0.00325	0.328342	yes	DOWN	N	N	Y	Y	Y	6.5	2.65
ENSRNOG00000021140.L01	116489	Kcnk4	potassium channel, subfamily K, member 4 [Source:RGD Symbol;Acc:621449]	12.7	4.67	-1.45	0.0033	0.330292	yes	DOWN	N	N	Y	Y	Y	12.13	4.9
ENSRNOG00000049410.L01	24260	Chrm3	cholinergic receptor, muscarinic 3 [Source:RGD Symbol;Acc:2343]	8.43	2.15	-1.97	0.00335	0.330682	yes	DOWN	N	N	Y	Y	Y	8.04	2.26
ENSRNOG00000029427.L01	298555	Grhl3	grainyhead-like 3 (Drosophila) [Source:RGD Symbol;Acc:1308320]	12.1	4.27	-1.5	0.00335	0.330682	yes	DOWN	N	N	Y	Y	Y	11.53	4.49
ENSRNOG00000033059.L01	100361647	Galnt6	polypeptide N-acetylgalactosaminyltransferase 6 [Source:RGD Symbol;Acc:2319726]	44.7	19.2	-1.22	0.00335	0.330682	yes	DOWN	N	N	Y	Y	Y	42.59	20.19
ENSRNOG00000012238.L01	365009	Clec3a	C-type lectin domain family 3, member A [Source:RGD Symbol;Acc:1306295]	8.13	2.19	-1.89	0.00345	0.337457	yes	DOWN	N	N	Y	Y	Y	7.76	2.3
ENSRNOG00000009531.L01	362285	Col9a3	collagen, type IX, alpha 3 [Source:RGD Symbol;Acc:1310255]	10.4	3.51	-1.56	0.00355	0.345667	yes	DOWN	N	N	Y	Y	Y	9.88	3.69
ENSRNOG00000000800.L01	294410	Man1a1	mannosidase, alpha, class 1A, member 1 [Source:RGD Symbol;Acc:1310891]	32.4	13.9	-1.22	0.00365	0.353803	yes	DOWN	N	N	Y	Y	Y	30.87	14.62
ENSRNOG00000002024.L01	79208	Epha5	EPH receptor A5 [Source:RGD Symbol;Acc:620831]	2.65	0.299	-3.15	0.00385	0.369858	yes	DOWN	N	N	Y	Y	Y	2.53	0.31
ENSRNOG00000013057.L01	308761	Prc1	protein regulator of cytokinesis 1 [Source:RGD Symbol;Acc:1311754]	9.72	2.99	-1.7	0.0039	0.372996	yes	DOWN	N	N	Y	Y	Y	9.27	3.14
ENSRNOG00000009399.L01	295714	RGD1311224	similar to fatty acid desaturase 2; linoleoyl-CoA desaturase (delta-6-desaturase)-like 2; delta-6 fatty acid desaturase [Source:RGD Symbol;Acc:1311224]	16.9	5.54	-1.61	0.00415	0.380911	yes	DOWN	N	N	Y	Y	Y	16.14	5.82
ENSRNOG00000004795.L01	302328	Pof1b	premature ovarian failure 1B [Source:RGD Symbol;Acc:1560798]	29.3	12.9	-1.19	0.00425	0.380911	yes	DOWN	N	N	Y	Y	Y	27.98	13.53
ENSRNOG00000018797.L01	360034	Myrip	myosin VIIA and Rab interacting protein [Source:RGD Symbol;Acc:727731]	12.8	5.49	-1.22	0.00425	0.380911	yes	DOWN	N	N	Y	Y	Y	12.21	5.77
ENSRNOG00000015321	294119	Moxd1	monooxygenase, DBH-like 1 [Source:RGD Symbol;Acc:1310033]	5.55	1.12	-2.31	0.00435	0.380911	yes	DOWN	N	N	Y	Y	Y	5.29	1.17
ENSRNOG00000019297.L01	29547	Homer2	homer homolog 2 (Drosophila) [Source:RGD Symbol;Acc:620705]	22.2	6.99	-1.67	0.0045	0.380911	yes	DOWN	N	N	Y	Y	Y	21.18	7.35
ENSRNOG00000012190.L02	300920	Cldn2	claudin 2 [Source:RGD Symbol;Acc:1560247]	17.5	3.14	-2.48	0.0045	0.380911	yes	DOWN	N	N	Y	Y	Y	16.72	3.3
ENSRNOG00000027089.L01	309918	Ell2	elongation factor RNA polymerase II 2 [Source:RGD Symbol;Acc:1309296]	30.1	12	-1.32	0.0045	0.380911	yes	DOWN	N	N	Y	Y	Y	28.76	12.66
ENSRNOG00000010887.L01	363016	RGD1309534	similar to RIKEN cDNA 4931406C07 [Source:RGD Symbol;Acc:1309534]	64.3	28.5	-1.18	0.00505	0.380911	yes	DOWN	N	N	Y	Y	Y	61.38	29.91
ENSRNOG00000029401	25365	Actg2	actin, gamma 2, smooth muscle, enteric [Source:RGD Symbol;Acc:2027]	15.1	3.75	-2.01	0.00525	0.380911	yes	DOWN	N	N	Y	Y	Y	14.42	3.95
ENSRNOG00000007804.L01	65044	C1galt1	core 1 synthase, glycoprotein-N-acetylgalactosamine 3-beta-galactosyltransferase, 1 [Source:RGD Symbol;Acc:621105]	50	21.6	-1.21	0.0053	0.380911	yes	DOWN	N	N	Y	Y	Y	47.74	22.73
ENSRNOG00000002031.L01	289482	Naa11	N(alpha)-acetyltransferase 11, NatA catalytic subunit [Source:RGD Symbol;Acc:1564723]	2.22	0.28	-2.98	0.0054	0.380911	yes	DOWN	N	N	Y	Y	Y	2.11	0.29
ENSRNOG00000023272	362720	Rrm2	ribonucleotide reductase M2 [Source:RGD Symbol;Acc:1598310]	10.7	1.87	-2.52	0.0054	0.380911	yes	DOWN	N	N	Y	Y	Y	10.2	1.96
ENSRNOG00000007636.L01	312166	Cadps2	Ca++-dependent secretion activator 2 [Source:RGD Symbol;Acc:1559440]	7.39	2.9	-1.35	0.00555	0.380911	yes	DOWN	N	N	Y	Y	Y	7.05	3.05
ENSRNOG00000020380.L01	29518	Lgals7	lectin, galactoside-binding, soluble, 7 [Source:RGD Symbol;Acc:61951]	250	110	-1.18	0.0058	0.380911	yes	DOWN	N	N	Y	Y	Y	238.29	115.93
ENSRNOG00000013932.L01	24710	Rbp2	retinol binding protein 2, cellular [Source:RGD Symbol;Acc:3544]	12.6	2.28	-2.47	0.00585	0.380911	yes	DOWN	N	N	Y	Y	Y	12	2.39
ENSRNOG00000016632.L01	291752	Dsg3	desmoglein 3 [Source:RGD Symbol;Acc:1592103]	29.1	13	-1.16	0.00595	0.380911	yes	DOWN	N	N	Y	Y	Y	27.72	13.69
ENSRNOG00000014441	303530	Krt16	keratin 16 [Source:RGD Symbol;Acc:1590901]	6.03	0.434	-3.8	0.00605	0.380911	yes	DOWN	N	N	Y	Y	Y	5.75	0.46
ENSRNOG00000010932	297894	Matn1	matrilin 1, cartilage matrix protein [Source:RGD Symbol;Acc:1359410]	4.59	0.345	-3.73	0.0061	0.380911	yes	DOWN	N	N	Y	Y	Y	4.37	0.36
ENSRNOG00000025603.L01	301269	Gpr111	G protein-coupled receptor 111 [Source:RGD Symbol;Acc:1306718]	2.06	0.47	-2.13	0.00615	0.380911	yes	DOWN	N	N	Y	Y	Y	1.97	0.49
ENSRNOG00000003468.L01	170808	Capn8	calpain 8 [Source:RGD Symbol;Acc:620085]	7.71	2.22	-1.8	0.00625	0.380911	yes	DOWN	N	N	Y	Y	Y	7.35	2.33
ENSRNOG00000011474.L01	192280	Ppp1r3b	protein phosphatase 1, regulatory subunit 3B [Source:RGD Symbol;Acc:621600]	8.57	3.29	-1.38	0.00625	0.380911	yes	DOWN	N	N	Y	Y	Y	8.17	3.46
ENSRNOG00000009334	311325	Knstrn	kinetochore-localized astrin/SPAG5 binding protein [Source:RGD Symbol;Acc:1303240]	5.58	1.02	-2.45	0.0063	0.380911	yes	DOWN	N	N	Y	Y	Y	5.32	1.07
ENSRNOG00000007892.L01	312903	Tram1	translocation associated membrane protein 1 [Source:RGD Symbol;Acc:1359100]	118	52.2	-1.18	0.00645	0.380911	yes	DOWN	N	N	Y	Y	Y	112.76	54.87
ENSRNOG00000037436.L01	314539	Macc1	metastasis associated in colon cancer 1 [Source:RGD Symbol;Acc:1309838]	4.99	1.64	-1.6	0.0066	0.380911	yes	DOWN	N	N	Y	Y	Y	4.76	1.73
ENSRNOG00000002640.L01	116589	Serpinb5	serpin peptidase inhibitor, clade B (ovalbumin), member 5 [Source:RGD Symbol;Acc:69342]	36.5	16.2	-1.17	0.00685	0.380911	yes	DOWN	N	N	Y	Y	Y	34.79	17.02
ENSRNOG00000017605.L01	291095	Gmds	GDP-mannose 4, 6-dehydratase [Source:RGD Symbol;Acc:1311008]	80.5	30.4	-1.41	0.007	0.380911	yes	DOWN	N	N	Y	Y	Y	76.76	31.9
ENSRNOG00000012920.L01	305104	Col9a1	collagen, type IX, alpha 1 [Source:RGD Symbol;Acc:1309425]	3.77	0.187	-4.33	0.00715	0.380911	yes	DOWN	N	N	Y	Y	Y	3.59	0.2
ENSRNOG00000004234	94273	Mgat2	mannosyl (alpha-1,6-)-glycoprotein beta-1,2-N-acetylglucosaminyltransferase [Source:RGD Symbol;Acc:620098]	29.4	12.8	-1.2	0.0072	0.380911	yes	DOWN	N	N	Y	Y	Y	28	13.45
ENSRNOG00000036877.L01	499721	Clca4l	chloride channel calcium activated 4-like [Source:RGD Symbol;Acc:1591945]	6.11	1.69	-1.86	0.0073	0.380911	yes	DOWN	N	N	Y	Y	Y	5.83	1.77
ENSRNOG00000004198.L01	362734	Stxbp6	syntaxin binding protein 6 (amisyn) [Source:RGD Symbol;Acc:1306117]	11.5	4.62	-1.32	0.0075	0.380911	yes	DOWN	N	N	Y	Y	Y	11	4.85
ENSRNOG00000008209.L01	362924	St3gal1	ST3 beta-galactoside alpha-2,3-sialyltransferase 1 [Source:RGD Symbol;Acc:1309373]	48.2	14.4	-1.74	0.00755	0.380911	yes	DOWN	N	N	Y	Y	Y	46.01	15.17
ENSRNOG00000014039	408199	Sucnr1	succinate receptor 1 [Source:RGD Symbol;Acc:1303193]	0.747	0	#NAME?	0.0077	0.380911	yes	DOWN	N	N	Y	Y	Y	0.71	0
ENSRNOG00000008450	100359539	LOC100359539	ribonucleotide reductase M2 polypeptide [Source:RGD Symbol;Acc:2323655]	6.12	1.58	-1.95	0.0077	0.380911	yes	DOWN	N	N	Y	Y	Y	5.84	1.66
ENSRNOG00000010023	64018	Slc33a1	solute carrier family 33 (acetyl-CoA transporter), member 1 [Source:RGD Symbol;Acc:620653]	30.2	13.4	-1.17	0.00775	0.38163	yes	DOWN	N	N	Y	Y	Y	28.83	14.11
ENSRNOG00000038933.L01	680782	Spcs3	signal peptidase complex subunit 3 homolog (S. cerevisiae) [Source:RGD Symbol;Acc:1588184]	54.7	25.7	-1.09	0.0082	0.399221	yes	DOWN	N	N	Y	Y	Y	52.22	27.02
ENSRNOG00000012318.L01	289054	Aspm	asp (abnormal spindle) homolog, microcephaly associated (Drosophila) [Source:RGD Symbol;Acc:1307111]	3.18	1.21	-1.4	0.0084	0.407116	yes	DOWN	N	N	Y	Y	Y	3.04	1.27
ENSRNOG00000018929.L01	309523	Kif20b	kinesin family member 20B [Source:RGD Symbol;Acc:1308497]	1.79	0.432	-2.05	0.00865	0.416419	yes	DOWN	N	N	Y	Y	Y	1.71	0.45
ENSRNOG00000028576.L01	364774	Calml5	calmodulin-like 5 [Source:RGD Symbol;Acc:1310047]	131	43.8	-1.58	0.00865	0.416419	yes	DOWN	N	N	Y	Y	Y	125.02	46.05
ENSRNOG00000006367.L01	500820	Slc5a8	solute carrier family 5 (sodium/monocarboxylate cotransporter), member 8 [Source:RGD Symbol;Acc:1564146]	6.09	2.28	-1.42	0.0087	0.416574	yes	DOWN	N	N	Y	Y	Y	5.81	2.39
ENSRNOG00000027736.L01	65204	Cnn1	calponin 1, basic, smooth muscle [Source:RGD Symbol;Acc:621883]	15.2	5.21	-1.54	0.00915	0.432745	yes	DOWN	N	N	Y	Y	Y	14.46	5.48
ENSRNOG00000018764.L01	290638	B3gnt3	UDP-GlcNAc:betaGal beta-1,3-N-acetylglucosaminyltransferase 3 [Source:RGD Symbol;Acc:1305151]	9.76	3.19	-1.61	0.0092	0.433205	yes	DOWN	N	N	Y	Y	Y	9.3	3.35
ENSRNOG00000016810.L01	303471	Stmn1	stathmin 1 [Source:RGD Symbol;Acc:2992]	58.6	25.9	-1.18	0.0093	0.435058	yes	DOWN	N	N	Y	Y	Y	55.9	27.24
ENSRNOG00000004921.L01	311336	Nusap1	nucleolar and spindle associated protein 1 [Source:RGD Symbol;Acc:1305764]	5.24	1.62	-1.69	0.00935	0.436448	yes	DOWN	N	N	Y	Y	Y	5	1.7
ENSRNOG00000014518.L01	290344	Adam28	ADAM metallopeptidase domain 28 [Source:RGD Symbol;Acc:727820]	24	10.8	-1.15	0.00975	0.449272	yes	DOWN	N	N	Y	Y	Y	22.89	11.34
ENSRNOG00000024661	360492	Hn1l	hematological and neurological expressed 1-like [Source:RGD Symbol;Acc:1305117]	30.9	14.1	-1.13	0.00975	0.449272	yes	DOWN	N	N	Y	Y	Y	29.5	14.8
ENSRNOG00000026053	50566	Grem1	gremlin 1 [Source:RGD Symbol;Acc:2359]	5.26	1.36	-1.96	0.0099	0.454239	yes	DOWN	N	N	Y	Y	Y	5.02	1.43
ENSRNOG00000003038.L01	360868	Sft2d2	SFT2 domain containing 2 [Source:RGD Symbol;Acc:1310623]	53.3	18.2	-1.55	0.01	0.457851	yes	DOWN	N	N	Y	Y	Y	50.86	19.14
ENSRNOG00000011907.L01	287678	Krt23	keratin 23 (histone deacetylase inducible) [Source:RGD Symbol;Acc:1308838]	76.3	27.3	-1.48	0.01055	0.473066	yes	DOWN	N	N	N	Y	Y	72.72	28.74
ENSRNOG00000028358.L01	289085	Edem3	ER degradation enhancer, mannosidase alpha-like 3 [Source:RGD Symbol;Acc:1561496]	18.2	8.5	-1.1	0.01085	0.476492	yes	DOWN	N	N	N	Y	Y	17.39	8.93
ENSRNOG00000029223.L01	302970	Prss32	protease, serine, 32 [Source:RGD Symbol;Acc:1311905]	4.34	0.952	-2.19	0.01095	0.479904	yes	DOWN	N	N	N	Y	Y	4.14	1
ENSRNOG00000011921.L01	60587	Dusp4	dual specificity phosphatase 4 [Source:RGD Symbol;Acc:620625]	4.38	1.48	-1.56	0.01105	0.483303	yes	DOWN	N	N	N	Y	Y	4.18	1.56
ENSRNOG00000021274.L01	296179	Fermt1	fermitin family member 1 [Source:RGD Symbol;Acc:1306816]	10.3	4.67	-1.15	0.0112	0.48887	yes	DOWN	N	N	N	Y	Y	9.87	4.91
ENSRNOG00000050534.L01	64043	Gcnt1	glucosaminyl (N-acetyl) transferase 1, core 2 [Source:RGD Symbol;Acc:621370]	10.2	4.53	-1.17	0.0115	0.498928	yes	DOWN	N	N	N	Y	Y	9.76	4.76
ENSRNOG00000002408.L01	305340	Rbm47	RNA binding motif protein 47 [Source:RGD Symbol;Acc:1359713]	24.6	11.7	-1.08	0.0118	0.509888	yes	DOWN	N	N	N	Y	Y	23.5	12.25
ENSRNOG00000008165.L01	311546	Tpx2	TPX2, microtubule-associated [Source:RGD Symbol;Acc:1311894]	5.46	1.46	-1.9	0.01185	0.511022	yes	DOWN	N	N	N	Y	Y	5.21	1.53
ENSRNOG00000014872.L01	310843	Sec24d	SEC24 family member D [Source:RGD Symbol;Acc:1311720]	23.4	11.3	-1.06	0.0119	0.512152	yes	DOWN	N	N	N	Y	Y	22.3	11.83
ENSRNOG00000013912.L01	310801	Slc30a7	solute carrier family 30 (zinc transporter), member 7 [Source:RGD Symbol;Acc:1307873]	21.7	9.01	-1.27	0.01195	0.513278	yes	DOWN	N	N	N	Y	Y	20.74	9.46
ENSRNOG00000013874	100360522	Rplp1	ribosomal protein, large, P1 [Source:RGD Symbol;Acc:621774]	2320	1000	-1.21	0.01205	0.514492	yes	DOWN	N	N	N	Y	Y	2214.64	1052.95
ENSRNOG00000007906.L01	171576	Bub1b	BUB1 mitotic checkpoint serine/threonine kinase B [Source:RGD Symbol;Acc:619791]	3.19	0.861	-1.89	0.0121	0.514585	yes	DOWN	N	N	N	Y	Y	3.05	0.91
ENSRNOG00000012535	501106	Gpr115	G protein-coupled receptor 115 [Source:RGD Symbol;Acc:1565216]	4.66	1.2	-1.96	0.01215	0.515692	yes	DOWN	N	N	N	Y	Y	4.44	1.26
ENSRNOG00000043342	290595	LOC290595	hypothetical gene supported by AF152002 [Source:RGD Symbol;Acc:1566160]	59.3	24.4	-1.28	0.0125	0.527426	yes	DOWN	N	N	N	Y	Y	56.57	25.6
ENSRNOG00000012494.L01	308836	Kctd14	potassium channel tetramerization domain containing 14 [Source:RGD Symbol;Acc:1306430]	37.4	16.3	-1.19	0.0131	0.533915	yes	DOWN	N	N	N	Y	Y	35.62	17.17
ENSRNOG00000016207.L01	79214	Galnt1	polypeptide N-acetylgalactosaminyltransferase 1 [Source:RGD Symbol;Acc:620358]	29.6	14.5	-1.03	0.01315	0.533915	yes	DOWN	N	N	N	Y	Y	28.27	15.2
ENSRNOG00000026844.L01	691259	Lypd8	LY6/PLAUR domain containing 8 [Source:RGD Symbol;Acc:1586251]	9.02	1.57	-2.53	0.01345	0.542005	yes	DOWN	N	N	N	Y	Y	8.6	1.65
ENSRNOG00000015275.L01	291441	Ska1	spindle and kinetochore associated complex subunit 1 [Source:RGD Symbol;Acc:1310784]	2.32	0.329	-2.82	0.0135	0.543003	yes	DOWN	N	N	N	Y	Y	2.21	0.35
ENSRNOG00000017766.L01	363085	Car12	carbonic anyhydrase 12 [Source:RGD Symbol;Acc:1306612]	33.3	16.4	-1.02	0.01375	0.549974	yes	DOWN	N	N	N	Y	Y	31.73	17.22
ENSRNOG00000024650	691173	Ckap2	cytoskeleton associated protein 2 [Source:RGD Symbol;Acc:1311631]	5.03	1.55	-1.69	0.01375	0.549974	yes	DOWN	N	N	N	Y	Y	4.8	1.63
ENSRNOG00000007755.L01	313130	Pm20d2	peptidase M20 domain containing 2 [Source:RGD Symbol;Acc:1307853]	7.65	3.42	-1.16	0.01405	0.560931	yes	DOWN	N	N	N	Y	Y	7.3	3.59
ENSRNOG00000004487.L01	690209	Nek2	NIMA-related kinase 2 [Source:RGD Symbol;Acc:619792]	1.69	0.214	-2.98	0.0143	0.569737	yes	DOWN	N	N	N	Y	Y	1.62	0.22
ENSRNOG00000002609.L01	364755	Ero1lb	ERO1-like beta (S. cerevisiae) [Source:RGD Symbol;Acc:1563548]	17.1	6.01	-1.51	0.01435	0.569737	yes	DOWN	N	N	N	Y	Y	16.35	6.32
ENSRNOG00000042978.L01	553106	Ncald	neurocalcin delta [Source:RGD Symbol;Acc:1560287]	10.4	4.56	-1.19	0.01435	0.569737	yes	DOWN	N	N	N	Y	Y	9.94	4.79
ENSRNOG00000015059.L01	246117	Mcfd2	multiple coagulation factor deficiency 2 [Source:RGD Symbol;Acc:628690]	96.9	34.8	-1.48	0.01445	0.572651	yes	DOWN	N	N	N	Y	Y	92.41	36.55
ENSRNOG00000013388.L01	316400	Pgap1	post-GPI attachment to proteins 1 [Source:RGD Symbol;Acc:1303213]	3.72	1.65	-1.17	0.0146	0.576472	yes	DOWN	N	N	N	Y	Y	3.55	1.74
ENSRNOG00000008676.L01	25314	Emp1	epithelial membrane protein 1 [Source:RGD Symbol;Acc:2552]	341	144	-1.25	0.0147	0.579207	yes	DOWN	N	N	N	Y	Y	325.59	150.81
ENSRNOG00000008945.L01	298071	Nans	N-acetylneuraminic acid synthase [Source:RGD Symbol;Acc:1311943]	84.1	42.7	-0.977	0.01485	0.581013	yes	DOWN	N	N	N	Y	N	80.21	44.9
ENSRNOG00000004821.L01	299940	Sntb1	syntrophin, beta 1 [Source:RGD Symbol;Acc:1307728]	17.7	8.46	-1.06	0.01505	0.584587	yes	DOWN	N	N	N	Y	Y	16.86	8.89
ENSRNOG00000009797	65133	Aqp3	aquaporin 3 [Source:RGD Symbol;Acc:68428]	384	167	-1.2	0.0152	0.588289	yes	DOWN	N	N	N	Y	Y	366	175.75
ENSRNOG00000021771.L01	300656	Trim29	tripartite motif-containing 29 [Source:RGD Symbol;Acc:1307858]	49.4	25.1	-0.977	0.01555	0.598605	yes	DOWN	N	N	N	Y	N	47.1	26.37
ENSRNOG00000017547.L01	114492	Ccl28	chemokine (C-C motif) ligand 28 [Source:RGD Symbol;Acc:619937]	31.3	14	-1.16	0.01595	0.608311	yes	DOWN	N	N	N	Y	Y	29.81	14.72
ENSRNOG00000001514	311742	Cdca7	cell division cycle associated 7 [Source:RGD Symbol;Acc:1309363]	24.2	11.5	-1.08	0.01595	0.608311	yes	DOWN	N	N	N	Y	Y	23.09	12.05
ENSRNOG00000002192.L01	289635	Rell1	RELT-like 1 [Source:RGD Symbol;Acc:1307468]	20.9	9.36	-1.16	0.016	0.608311	yes	DOWN	N	N	N	Y	Y	19.98	9.83
ENSRNOG00000010996.L02	360920	Mob1b	MOB kinase activator 1B [Source:RGD Symbol;Acc:1305114]	16.2	7.74	-1.06	0.016	0.608311	yes	DOWN	N	N	N	Y	Y	15.45	8.13
ENSRNOG00000014960.L01	64557	Bard1	BRCA1 associated RING domain 1 [Source:RGD Symbol;Acc:621072]	1.69	0.43	-1.98	0.01615	0.612931	yes	DOWN	N	N	N	Y	Y	1.61	0.45
ENSRNOG00000002164.L01	63887	Nmu	neuromedin U [Source:RGD Symbol;Acc:68388]	13.3	2.74	-2.28	0.01625	0.614558	yes	DOWN	N	N	N	Y	Y	12.67	2.88
ENSRNOG00000018742.L01	292849	Klk11	kallikrein related-peptidase 11 [Source:RGD Symbol;Acc:1308690]	5.29	0.339	-3.97	0.01635	0.617256	yes	DOWN	N	N	N	Y	Y	5.04	0.36
ENSRNOG00000011925.L01	315829	Fam83b	family with sequence similarity 83, member B [Source:RGD Symbol;Acc:1311988]	4.72	2.07	-1.19	0.01645	0.619943	yes	DOWN	N	N	N	Y	Y	4.5	2.18
ENSRNOG00000029055.L01	315852	Ttk	Ttk protein kinase [Source:RGD Symbol;Acc:1305558]	1.82	0.343	-2.41	0.0166	0.623413	yes	DOWN	N	N	N	Y	Y	1.74	0.36
ENSRNOG00000015921	691979	Esco2	establishment of sister chromatid cohesion N-acetyltransferase 2 [Source:RGD Symbol;Acc:1593313]	1.95	0.46	-2.08	0.0169	0.632471	yes	DOWN	N	N	N	Y	Y	1.86	0.48
ENSRNOG00000005853.L01	24807	Tacr1	tachykinin receptor 1 [Source:RGD Symbol;Acc:3811]	15.7	7.73	-1.02	0.01705	0.636977	yes	DOWN	N	N	N	Y	Y	14.94	8.13
ENSRNOG00000037085.L01	100910104	LOC100910104	xin actin-binding repeat-containing protein 1-like [Source:RGD Symbol;Acc:6500102]	11.8	5.84	-1.02	0.0172	0.641468	yes	DOWN	N	N	N	Y	Y	11.28	6.14
ENSRNOG00000032959	171178	Adh7	alcohol dehydrogenase 7 (class IV), mu or sigma polypeptide [Source:RGD Symbol;Acc:621638]	104	52	-1	0.01725	0.642219	yes	DOWN	N	N	N	Y	N	99.28	54.68
ENSRNOG00000011575.L01	361412	Adamts18	ADAM metallopeptidase with thrombospondin type 1 motif, 18 [Source:RGD Symbol;Acc:1560118]	3.41	0.263	-3.69	0.0174	0.646685	yes	DOWN	N	N	N	Y	Y	3.25	0.28
ENSRNOG00000012864.L01	498013	Ern1	endoplasmic reticulum to nucleus signaling 1 [Source:RGD Symbol;Acc:1559716]	24	12.3	-0.966	0.01755	0.651135	yes	DOWN	N	N	N	Y	N	22.87	12.9
ENSRNOG00000006069	29702	Eif2ak3	eukaryotic translation initiation factor 2 alpha kinase 3 [Source:RGD Symbol;Acc:70884]	26.9	13.4	-1	0.01765	0.652203	yes	DOWN	N	N	N	Y	Y	25.64	14.11
ENSRNOG00000015867.L01	291770	Chst9	carbohydrate (N-acetylgalactosamine 4-0) sulfotransferase 9 [Source:RGD Symbol;Acc:1307302]	20.1	10	-1.01	0.0177	0.652203	yes	DOWN	N	N	N	Y	Y	19.18	10.52
ENSRNOG00000027730.L01	500992	RGD1566243	similar to protein of unknown function [Source:RGD Symbol;Acc:1566243]	36.6	13.8	-1.41	0.0177	0.652203	yes	DOWN	N	N	N	Y	Y	34.93	14.46
ENSRNOG00000002771.L01	59325	Ereg	epiregulin [Source:RGD Symbol;Acc:620299]	1.37	0.122	-3.49	0.0178	0.654766	yes	DOWN	N	N	N	Y	Y	1.3	0.13
ENSRNOG00000010866.L01	361972	Tmem154	transmembrane protein 154 [Source:RGD Symbol;Acc:1563262]	19.6	7.41	-1.41	0.01825	0.662959	yes	DOWN	N	N	N	Y	Y	18.74	7.79
ENSRNOG00000003781.L01	303056	Atp10b	ATPase, class V, type 10B [Source:RGD Symbol;Acc:1565126]	5.5	2.3	-1.25	0.0183	0.662959	yes	DOWN	N	N	N	Y	Y	5.24	2.42
ENSRNOG00000015971.L01	83629	Slc12a2	solute carrier family 12 (sodium/potassium/chloride transporter), member 2 [Source:RGD Symbol;Acc:620809]	108	48.6	-1.15	0.0187	0.672919	yes	DOWN	N	N	N	Y	Y	102.95	51.1
ENSRNOG00000026951.L01	301039	Susd5	sushi domain containing 5 [Source:RGD Symbol;Acc:1561132]	3.28	1.09	-1.59	0.01895	0.680776	yes	DOWN	N	N	N	Y	Y	3.12	1.14
ENSRNOG00000006170.L01	313125	Bach2	BTB and CNC homology 1, basic leucine zipper transcription factor 2 [Source:RGD Symbol;Acc:1562865]	3.26	1.38	-1.24	0.0191	0.685021	yes	DOWN	N	N	N	Y	Y	3.11	1.45
ENSRNOG00000005599.L01	297572	Cpamd8	C3 and PZP-like, alpha-2-macroglobulin domain containing 8 [Source:EntrezGene;Acc:297572]	1.47	0.0769	-4.25	0.0194	0.694623	yes	DOWN	N	N	N	Y	Y	1.4	0.08
ENSRNOG00000001953.L01	288227	Bace2	beta-site APP-cleaving enzyme 2 [Source:RGD Symbol;Acc:1303241]	72.6	33.5	-1.12	0.0196	0.699457	yes	DOWN	N	N	N	Y	Y	69.24	35.17
ENSRNOG00000039969.L01	291760	Dsc2	desmocollin 2 [Source:RGD Symbol;Acc:1309426]	48.7	25	-0.964	0.0197	0.699545	yes	DOWN	N	N	N	Y	N	46.48	26.24
ENSRNOG00000004951.L01	311478	Kif16b	kinesin family member 16B [Source:RGD Symbol;Acc:1310146]	9.62	4.81	-1	0.0198	0.701938	yes	DOWN	N	N	N	Y	Y	9.18	5.05
ENSRNOG00000003873.L01	25306	Cpd	carboxypeptidase D [Source:RGD Symbol;Acc:2393]	53.8	23.8	-1.18	0.02035	0.719067	yes	DOWN	N	N	N	Y	Y	51.31	25
ENSRNOG00000010298	289754	Xbp1	X-box binding protein 1 [Source:RGD Symbol;Acc:1303073]	381	175	-1.12	0.0205	0.721996	yes	DOWN	N	N	N	Y	Y	363.68	184.1
ENSRNOG00000018635.L01	25203	Ccnb1	cyclin B1 [Source:RGD Symbol;Acc:2291]	8.11	2.73	-1.57	0.0209	0.72423	yes	DOWN	N	N	N	Y	Y	7.74	2.87
ENSRNOG00000019776.L01	81921	Sh3gl3	SH3-domain GRB2-like 3 [Source:RGD Symbol;Acc:620578]	5.65	1.67	-1.76	0.0211	0.72704	yes	DOWN	N	N	N	Y	Y	5.39	1.76
ENSRNOG00000016122	25675	Hmgcr	3-hydroxy-3-methylglutaryl-CoA reductase [Source:RGD Symbol;Acc:2803]	22.2	11.4	-0.965	0.02135	0.729804	yes	DOWN	N	N	N	Y	N	21.19	11.95
ENSRNOG00000002488.L01	170501	Galnt10	polypeptide N-acetylgalactosaminyltransferase 10 [Source:RGD Symbol;Acc:69409]	10.7	5.04	-1.09	0.0214	0.729804	yes	DOWN	N	N	N	Y	Y	10.23	5.3
ENSRNOG00000018525.L01	266612	Slc4a9	solute carrier family 4, sodium bicarbonate cotransporter, member 9 [Source:RGD Symbol;Acc:628811]	2.45	0.605	-2.02	0.0217	0.734217	yes	DOWN	N	N	N	Y	Y	2.34	0.64
ENSRNOG00000024089.L01	294925	Fndc3b	fibronectin type III domain containing 3B [Source:RGD Symbol;Acc:1311673]	15.2	7.86	-0.946	0.02225	0.749292	yes	DOWN	N	N	N	Y	N	14.45	8.26
ENSRNOG00000011068.L01	294103	Papss2	3'-phosphoadenosine 5'-phosphosulfate synthase 2 [Source:RGD Symbol;Acc:1307012]	33	17.2	-0.94	0.02255	0.753499	yes	DOWN	N	N	N	Y	N	31.5	18.09
ENSRNOG00000026143.L01	680515	Ckap2l	cytoskeleton associated protein 2-like [Source:RGD Symbol;Acc:1590645]	3.14	0.981	-1.68	0.02255	0.753499	yes	DOWN	N	N	N	Y	Y	2.99	1.03
ENSRNOG00000015794	311598	Fam83d	family with sequence similarity 83, member D [Source:RGD Symbol;Acc:1565583]	2.99	0.796	-1.91	0.02285	0.75881	yes	DOWN	N	N	N	Y	Y	2.85	0.84
ENSRNOG00000016690.L01	89784	Idi1	isopentenyl-diphosphate delta isomerase 1 [Source:RGD Symbol;Acc:621835]	10	4.33	-1.21	0.02325	0.768536	yes	DOWN	N	N	N	Y	Y	9.55	4.54
ENSRNOG00000024657.L01	498228	Mfsd4	major facilitator superfamily domain containing 4 [Source:RGD Symbol;Acc:1566090]	95	40.9	-1.22	0.02355	0.774881	yes	DOWN	N	N	N	Y	Y	90.63	42.97
ENSRNOG00000009339.L01	362044	Cenpe	centromere protein E [Source:RGD Symbol;Acc:1307115]	1.46	0.53	-1.46	0.0242	0.787083	yes	DOWN	N	N	N	Y	Y	1.39	0.56
ENSRNOG00000024689.L01	171160	Hopx	HOP homeobox [Source:RGD Symbol;Acc:621841]	183	95.3	-0.941	0.02425	0.787083	yes	DOWN	N	N	N	Y	N	174.53	100.17
ENSRNOG00000022710.L01	499847	Prrg4	proline rich Gla (G-carboxyglutamic acid) 4 (transmembrane) [Source:RGD Symbol;Acc:1560542]	11.5	5.99	-0.948	0.0244	0.789569	yes	DOWN	N	N	N	Y	N	11.01	6.29
ENSRNOG00000020468.L01	291699	Stard4	StAR-related lipid transfer (START) domain containing 4 [Source:RGD Symbol;Acc:1309475]	5.41	2.09	-1.37	0.02445	0.789999	yes	DOWN	N	N	N	Y	Y	5.16	2.19
ENSRNOG00000008282.L01	100910896	Elf5	E74-like factor 5 [Source:RGD Symbol;Acc:1305859]	42	19.6	-1.1	0.0247	0.795688	yes	DOWN	N	N	N	Y	Y	40.02	20.57
ENSRNOG00000012663.L01	301388	Mfsd6	major facilitator superfamily domain containing 6 [Source:RGD Symbol;Acc:1562317]	20.8	11	-0.927	0.0249	0.797356	yes	DOWN	N	N	N	Y	N	19.89	11.52
ENSRNOG00000016397.L01	300682	Tmprss13	transmembrane protease, serine 13 [Source:RGD Symbol;Acc:1310872]	10.4	4.98	-1.07	0.0251	0.801375	yes	DOWN	N	N	N	Y	Y	9.96	5.24
ENSRNOG00000033618.L01	312115	Col28a1	collagen, type XXVIII, alpha 1 [Source:RGD Symbol;Acc:1564680]	2.66	0.891	-1.58	0.0251	0.801375	yes	DOWN	N	N	N	Y	Y	2.54	0.94
ENSRNOG00000014511	245960	Alg10	ALG10, alpha-1,2-glucosyltransferase [Source:RGD Symbol;Acc:708500]	12.5	5.21	-1.26	0.02535	0.804582	yes	DOWN	N	N	N	Y	Y	11.9	5.47
ENSRNOG00000009503.L01	295538	Depdc1	DEP domain containing 1 [Source:RGD Symbol;Acc:1306987]	2.38	0.542	-2.13	0.0254	0.804982	yes	DOWN	N	N	N	Y	Y	2.27	0.57
ENSRNOG00000011213.L01	308755	Blm	Bloom syndrome, RecQ helicase-like [Source:RGD Symbol;Acc:1308810]	7.77	3.27	-1.25	0.02545	0.80538	yes	DOWN	N	N	N	Y	Y	7.41	3.44
ENSRNOG00000013823.L01	499174	Cers3	ceramide synthase 3 [Source:RGD Symbol;Acc:1564356]	2.76	0.749	-1.88	0.0256	0.805389	yes	DOWN	N	N	N	Y	Y	2.63	0.79
ENSRNOG00000046005	100912469	LOC100912469	acyl-CoA desaturase 2-like [Source:RGD Symbol;Acc:6486472]	78.7	39.5	-0.994	0.0257	0.807355	yes	DOWN	N	N	N	Y	N	75.06	41.51
ENSRNOG00000000632.L01	54237	Cdk1	cyclin-dependent kinase 1 [Source:RGD Symbol;Acc:2319]	11.5	4	-1.53	0.026	0.813218	yes	DOWN	N	N	N	Y	Y	11.01	4.2
ENSRNOG00000016076	64673	Pip	prolactin induced protein [Source:RGD Symbol;Acc:70946]	31.1	1.05	-4.89	0.02615	0.816723	yes	DOWN	N	N	N	Y	Y	29.71	1.1
ENSRNOG00000018187	100909901	LOC100909901	rac GTPase-activating protein 1-like [Source:RGD Symbol;Acc:6501444]	3.16	0.883	-1.84	0.02635	0.820587	yes	DOWN	N	N	N	Y	Y	3.01	0.93
ENSRNOG00000011777	252918	Spag5	sperm associated antigen 5 [Source:RGD Symbol;Acc:620152]	2.48	0.864	-1.52	0.0264	0.820956	yes	DOWN	N	N	N	Y	Y	2.36	0.91
ENSRNOG00000027447.L01	311030	Stam2	signal transducing adaptor molecule (SH3 domain and ITAM motif) 2 [Source:RGD Symbol;Acc:1311497]	14.7	7.42	-0.992	0.02685	0.832543	yes	DOWN	N	N	N	Y	N	14.07	7.79
ENSRNOG00000014901.L01	171129	Uggt1	UDP-glucose glycoprotein glucosyltransferase 1 [Source:RGD Symbol;Acc:619710]	18.8	10.1	-0.904	0.0274	0.847156	yes	DOWN	N	N	N	Y	N	17.97	10.58
ENSRNOG00000003464.L01	287822	Hid1	HID1 domain containing [Source:RGD Symbol;Acc:1311422]	36.3	19.3	-0.911	0.02755	0.850572	yes	DOWN	N	N	N	Y	N	34.66	20.31
ENSRNOG00000003705.L01	367786	Bmx	BMX non-receptor tyrosine kinase [Source:RGD Symbol;Acc:1565643]	35.7	15.7	-1.19	0.0282	0.863209	yes	DOWN	N	N	N	Y	Y	34.11	16.48
ENSRNOG00000011377.L01	305828	Socs4	suppressor of cytokine signaling 4 [Source:RGD Symbol;Acc:1306503]	5.93	2.39	-1.31	0.0284	0.865934	yes	DOWN	N	N	N	Y	Y	5.66	2.51
ENSRNOG00000013452.L01	362182	Rcn1	reticulocalbin 1, EF-hand calcium binding domain [Source:RGD Symbol;Acc:1311292]	115	58.2	-0.986	0.02845	0.865934	yes	DOWN	N	N	N	Y	N	109.86	61.14
ENSRNOG00000001964.L01	29364	Cd47	Cd47 molecule [Source:RGD Symbol;Acc:2308]	49.8	22.4	-1.15	0.0287	0.86892	yes	DOWN	N	N	N	Y	Y	47.51	23.55
ENSRNOG00000030676.L01	502412	RGD1562885	similar to RIKEN cDNA 2300002M23 [Source:RGD Symbol;Acc:1562885]	18	7.98	-1.18	0.0287	0.86892	yes	DOWN	N	N	N	Y	Y	17.19	8.38
ENSRNOG00000032659.L01	84587	Plcl1	phospholipase C-like 1 [Source:RGD Symbol;Acc:708420]	3.18	1.3	-1.29	0.02875	0.86892	yes	DOWN	N	N	N	Y	Y	3.04	1.37
ENSRNOG00000011381	171410	Acsbg1	acyl-CoA synthetase bubblegum family member 1 [Source:RGD Symbol;Acc:708557]	6.19	2.3	-1.43	0.02875	0.86892	yes	DOWN	N	N	N	Y	Y	5.9	2.42
ENSRNOG00000012068.L01	685849	LOC685849	hypothetical protein LOC685849 [Source:RGD Symbol;Acc:1589037]	15.1	7.56	-0.995	0.02875	0.86892	yes	DOWN	N	N	N	Y	N	14.37	7.94
ENSRNOG00000030281.L01	292850	Klk10	kallikrein related-peptidase 10 [Source:RGD Symbol;Acc:1303242]	3.02	0.396	-2.93	0.0288	0.869211	yes	DOWN	N	N	N	Y	Y	2.88	0.42
ENSRNOG00000025994.L01	315318	Krt80	keratin 80 [Source:RGD Symbol;Acc:1359177]	46.2	24.2	-0.933	0.02895	0.870364	yes	DOWN	N	N	N	Y	N	44.07	25.44
ENSRNOG00000009946.L01	300438	Ldlr	low density lipoprotein receptor [Source:RGD Symbol;Acc:2998]	24	12.9	-0.898	0.02905	0.87065	yes	DOWN	N	N	N	Y	N	22.92	13.56
ENSRNOG00000007234	25427	Cyp51	cytochrome P450, family 51 [Source:RGD Symbol;Acc:2481]	24.7	13	-0.93	0.0293	0.874768	yes	DOWN	N	N	N	Y	N	23.55	13.62
ENSRNOG00000000029.L01	24582	Myh11	myosin, heavy chain 11, smooth muscle [Source:RGD Symbol;Acc:3136]	27.2	14.6	-0.899	0.0295	0.878023	yes	DOWN	N	N	N	Y	N	25.9	15.31
ENSRNOG00000013598.L01	362510	Melk	maternal embryonic leucine zipper kinase [Source:RGD Symbol;Acc:1308974]	1.7	0.386	-2.14	0.0299	0.883816	yes	DOWN	N	N	N	Y	Y	1.62	0.41
ENSRNOG00000037227.L01	24884	Yes1	Yamaguchi sarcoma viral (v-yes) oncogene homolog 1 [Source:RGD Symbol;Acc:3977]	17.1	8.59	-0.993	0.0301	0.886076	yes	DOWN	N	N	N	Y	N	16.31	9.03
ENSRNOG00000008115.L01	296060	Arhgap11a	Rho GTPase activating protein 11A [Source:RGD Symbol;Acc:1309107]	4.49	1.95	-1.21	0.0301	0.886076	yes	DOWN	N	N	N	Y	Y	4.28	2.04
ENSRNOG00000050675	688228	Myl4	myosin, light chain 4 [Source:RGD Symbol;Acc:1591197]	15.3	4.85	-1.66	0.03045	0.892716	yes	DOWN	N	N	N	Y	Y	14.57	5.09
ENSRNOG00000025115.L01	315663	Exph5	exophilin 5 [Source:RGD Symbol;Acc:1560308]	9.7	5.28	-0.878	0.0305	0.892965	yes	DOWN	N	N	N	Y	N	9.25	5.55
ENSRNOG00000018276.L01	499166	Mgat4a	mannosyl (alpha-1,3-)-glycoprotein beta-1,4-N-acetylglucosaminyltransferase, isozyme A [Source:RGD Symbol;Acc:1305650]	15.9	8.66	-0.881	0.0309	0.903447	yes	DOWN	N	N	N	Y	N	15.2	9.09
ENSRNOG00000049414.L01	683007	Mia3	melanoma inhibitory activity family, member 3 [Source:RGD Symbol;Acc:1591600]	43.6	23.6	-0.889	0.03095	0.903681	yes	DOWN	N	N	N	Y	N	41.6	24.75
ENSRNOG00000015308	290326	Pbk	PDZ binding kinase [Source:RGD Symbol;Acc:1309565]	2.75	0.654	-2.07	0.03115	0.908288	yes	DOWN	N	N	N	Y	Y	2.63	0.69
ENSRNOG00000047620.L01	310669	Golph3l	golgi phosphoprotein 3-like [Source:RGD Symbol;Acc:1359281]	19.5	10	-0.961	0.03125	0.908742	yes	DOWN	N	N	N	Y	N	18.62	10.54
ENSRNOG00000023322.L01	362040	Ostc	oligosaccharyltransferase complex subunit (non-catalytic) [Source:RGD Symbol;Acc:1560708]	130	66.1	-0.972	0.03125	0.908742	yes	DOWN	N	N	N	Y	N	123.56	69.42
ENSRNOG00000016926.L01	499377	Plekhs1	pleckstrin homology domain containing, family S member 1 [Source:RGD Symbol;Acc:1559884]	7.94	3.89	-1.03	0.0314	0.910642	yes	DOWN	N	N	N	Y	Y	7.58	4.09
ENSRNOG00000047969.L01	353251	Prss21	protease, serine, 21 [Source:RGD Symbol;Acc:727870]	3.56	0.857	-2.05	0.0315	0.912313	yes	DOWN	N	N	N	Y	Y	3.39	0.9
ENSRNOG00000024365.L01	361921	Ect2	epithelial cell transforming 2 [Source:RGD Symbol;Acc:1308524]	4.36	1.02	-2.09	0.03175	0.91463	yes	DOWN	N	N	N	Y	Y	4.15	1.08
ENSRNOG00000019779.L01	307940	Disc1	disrupted in schizophrenia 1 [Source:RGD Symbol;Acc:631359]	4.51	2.06	-1.13	0.03185	0.91506	yes	DOWN	N	N	N	Y	Y	4.3	2.17
ENSRNOG00000037304.L01	100911204	Casc5	cancer susceptibility candidate 5 [Source:RGD Symbol;Acc:1307498]	1.75	0.301	-2.54	0.0321	0.919787	yes	DOWN	N	N	N	Y	Y	1.67	0.32
ENSRNOG00000019440.L01	65206	Kcnn4	potassium intermediate/small conductance calcium-activated channel, subfamily N, member 4 [Source:RGD Symbol;Acc:621476]	61.4	31.5	-0.96	0.03265	0.929553	yes	DOWN	N	N	N	Y	N	58.5	33.16
ENSRNOG00000033119.L01	25031	Plcb4	phospholipase C, beta 4 [Source:RGD Symbol;Acc:3345]	16.3	8.6	-0.918	0.0327	0.929553	yes	DOWN	N	N	N	Y	N	15.5	9.04
ENSRNOG00000007484.L01	295965	Ehf	ets homologous factor [Source:RGD Symbol;Acc:1310282]	115	57.2	-1	0.0328	0.931165	yes	DOWN	N	N	N	Y	Y	109.36	60.07
ENSRNOG00000039924.L01	500413	Triqk	triple QxxK/R motif containing [Source:RGD Symbol;Acc:1561260]	8.99	3.49	-1.36	0.03315	0.937391	yes	DOWN	N	N	N	Y	Y	8.57	3.67
ENSRNOG00000011582.L01	140665	Rab3d	RAB3D, member RAS oncogene family [Source:RGD Symbol;Acc:620924]	76.9	40.7	-0.918	0.03345	0.940408	yes	DOWN	N	N	N	Y	N	73.38	42.8
ENSRNOG00000003403.L01	288993	Slc35f5	solute carrier family 35, member F5 [Source:RGD Symbol;Acc:1308125]	36.1	19.8	-0.87	0.0336	0.940408	yes	DOWN	N	N	N	Y	N	34.46	20.77
ENSRNOG00000033933	288075	Stfa3	stefin A3 [Source:RGD Symbol;Acc:1307831]	28.3	7.15	-1.98	0.03365	0.940408	yes	DOWN	N	N	N	Y	Y	26.95	7.52
ENSRNOG00000019414.L01	310626	Tmem79	transmembrane protein 79 [Source:RGD Symbol;Acc:1309886]	14.7	7.24	-1.02	0.03385	0.941109	yes	DOWN	N	N	N	Y	Y	14.01	7.61
ENSRNOG00000003746.L01	29584	Gjb1	gap junction protein, beta 1 [Source:RGD Symbol;Acc:61926]	22.1	10.2	-1.11	0.03415	0.948224	yes	DOWN	N	N	N	Y	Y	21.09	10.74
ENSRNOG00000001792.L01	266733	Slc12a8	solute carrier family 12, member 8 [Source:RGD Symbol;Acc:628730]	6.89	2.69	-1.35	0.03425	0.949775	yes	DOWN	N	N	N	Y	Y	6.57	2.83
ENSRNOG00000010895.L01	300857	Tmem30a	transmembrane protein 30A [Source:RGD Symbol;Acc:1303315]	57	29.1	-0.97	0.0343	0.949938	yes	DOWN	N	N	N	Y	N	54.34	30.56
ENSRNOG00000020669.L02	309164	Ovol1	ovo-like zinc finger 1 [Source:RGD Symbol;Acc:1306956]	17.9	7.39	-1.27	0.03445	0.950583	yes	DOWN	N	N	N	Y	Y	17.03	7.77
ENSRNOG00000025764	100362769	Mt1	metallothionein 1 [Source:RGD Symbol;Acc:3117]	404	216	-0.903	0.03445	0.950583	yes	DOWN	N	N	N	Y	N	384.78	226.85
ENSRNOG00000017912.L01	25391	Atp2a3	ATPase, Ca++ transporting, ubiquitous [Source:RGD Symbol;Acc:2175]	416	157	-1.41	0.03495	0.957008	yes	DOWN	N	N	N	Y	Y	396.45	164.53
ENSRNOG00000024190.L01	298138	LOC683719	similar to RAS and EF hand domain containing [Source:RGD Symbol;Acc:1583373]	12.7	6.86	-0.885	0.03515	0.958673	yes	DOWN	N	N	N	Y	N	12.08	7.2
ENSRNOG00000011820.L01	56780	Acpp	acid phosphatase, prostate [Source:RGD Symbol;Acc:2023]	28.7	14.9	-0.942	0.03575	0.967687	yes	DOWN	N	N	N	Y	N	27.39	15.71
ENSRNOG00000015716	171459	Gp2	glycoprotein 2 (zymogen granule membrane) [Source:RGD Symbol;Acc:621695]	755	323	-1.22	0.03575	0.967687	yes	DOWN	N	N	N	Y	Y	719.98	339.5
ENSRNOG00000003208	317252	Ercc6l	excision repair cross-complementation group 6-like [Source:RGD Symbol;Acc:1565734]	0.786	0.154	-2.35	0.03595	0.967687	yes	DOWN	N	N	N	Y	Y	0.75	0.16
ENSRNOG00000046878.L01	364648	Shcbp1	Shc SH2-domain binding protein 1 [Source:RGD Symbol;Acc:1590844]	1.54	0.221	-2.8	0.036	0.967687	yes	DOWN	N	N	N	Y	Y	1.47	0.23
ENSRNOG00000018113	307056	Anlnl1	anillin, actin binding protein-like 1 [Source:RGD Symbol;Acc:1566097]	2.75	0.943	-1.54	0.03665	0.973794	yes	DOWN	N	N	N	Y	Y	2.62	0.99
ENSRNOG00000046252.L01	686610	Tbl2	transducin (beta)-like 2 [Source:RGD Symbol;Acc:1595038]	8.62	4.42	-0.965	0.03665	0.973794	yes	DOWN	N	N	N	Y	N	8.23	4.64
ENSRNOG00000018082.L01	117267	Slc26a2	solute carrier family 26 (anion exchanger), member 2 [Source:RGD Symbol;Acc:620622]	8.14	4.37	-0.899	0.0367	0.973794	yes	DOWN	N	N	N	Y	N	7.77	4.59
ENSRNOG00000002280.L01	302363	Sh3bgrl	SH3 domain binding glutamate-rich protein like [Source:RGD Symbol;Acc:1560520]	63.1	34.3	-0.877	0.0367	0.973794	yes	DOWN	N	N	N	Y	N	60.19	36.08
ENSRNOG00000012623	79120	Arf4	ADP-ribosylation factor 4 [Source:RGD Symbol;Acc:621275]	176	94.9	-0.895	0.0368	0.974046	yes	DOWN	N	N	N	Y	N	168.33	99.72
ENSRNOG00000010238	361916	Chmp4c	charged multivesicular body protein 4C [Source:RGD Symbol;Acc:1564543]	37.1	19.4	-0.931	0.03685	0.974171	yes	DOWN	N	N	N	Y	N	35.35	20.42
ENSRNOG00000028261.L01	361466	Tppp	tubulin polymerization promoting protein [Source:RGD Symbol;Acc:1310121]	23.4	12.3	-0.928	0.03695	0.975616	yes	DOWN	N	N	N	Y	N	22.34	12.94
ENSRNOG00000027894.L01	310621	Iqgap3	IQ motif containing GTPase activating protein 3 [Source:RGD Symbol;Acc:1305951]	2.86	1.19	-1.26	0.03715	0.978496	yes	DOWN	N	N	N	Y	Y	2.72	1.26
ENSRNOG00000021134.L01	689830	Anxa9	annexin A9 [Source:RGD Symbol;Acc:1587550]	10.2	4.44	-1.2	0.03715	0.978496	yes	DOWN	N	N	N	Y	Y	9.73	4.66
ENSRNOG00000019902.L01	171049	Folr1	folate receptor 1 (adult) [Source:RGD Symbol;Acc:71032]	4.46	1.1	-2.02	0.0372	0.978615	yes	DOWN	N	N	N	Y	Y	4.26	1.16
ENSRNOG00000036682.L01	287877	Pycr1	pyrroline-5-carboxylate reductase 1 [Source:RGD Symbol;Acc:1307863]	14.8	5.84	-1.34	0.0379	0.992178	yes	DOWN	N	N	N	Y	Y	14.11	6.14
ENSRNOG00000032834.L01	29734	Hspa13	heat shock protein 70 family, member 13 [Source:RGD Symbol;Acc:3775]	14.2	7.53	-0.911	0.038	0.993587	yes	DOWN	N	N	N	Y	N	13.51	7.91
ENSRNOG00000024470.L01	116666	Lman1	lectin, mannose-binding, 1 [Source:RGD Symbol;Acc:71020]	43.7	24.4	-0.842	0.03855	0.995127	yes	DOWN	N	N	N	Y	N	41.72	25.63
ENSRNOG00000019422	24330	Egr1	early growth response 1 [Source:RGD Symbol;Acc:2544]	32.5	17.9	-0.862	0.0386	0.995127	yes	DOWN	N	N	N	Y	N	30.96	18.77
ENSRNOG00000011284.L01	310849	Sgms2	sphingomyelin synthase 2 [Source:RGD Symbol;Acc:1305778]	4.06	1.68	-1.27	0.03885	0.995127	yes	DOWN	N	N	N	Y	Y	3.87	1.76
ENSRNOG00000030170.L01	450225	Krt10	keratin 10 [Source:RGD Symbol;Acc:1359092]	6.93	3.15	-1.14	0.03885	0.995127	yes	DOWN	N	N	N	Y	Y	6.61	3.31
ENSRNOG00000013939	64389	Defb4	defensin beta 4 [Source:RGD Symbol;Acc:619944]	1.57	0	#NAME?	0.03925	0.995127	yes	DOWN	N	N	N	Y	Y	1.5	0
ENSRNOG00000005447.L01	360590	Ypel2	yippee-like 2 (Drosophila) [Source:RGD Symbol;Acc:1311564]	8.02	4.2	-0.933	0.03925	0.995127	yes	DOWN	N	N	N	Y	N	7.65	4.41
ENSRNOG00000004968.L01	362798	Ncapg2	non-SMC condensin II complex, subunit G2 [Source:RGD Symbol;Acc:1308406]	2.37	0.978	-1.27	0.0394	0.995127	yes	DOWN	N	N	N	Y	Y	2.26	1.03
ENSRNOG00000012186.L01	78961	Golph3	golgi phosphoprotein 3 (coat-protein) [Source:RGD Symbol;Acc:621226]	112	56.6	-0.982	0.03965	0.997192	yes	DOWN	N	N	N	Y	N	106.61	59.5
ENSRNOG00000008040	360559	Fam64a	family with sequence similarity 64, member A [Source:RGD Symbol;Acc:1308747]	3.17	0.812	-1.96	0.0397	0.997192	yes	DOWN	N	N	N	Y	Y	3.02	0.85
ENSRNOG00000012294.L01	117240	Heph	hephaestin [Source:RGD Symbol;Acc:71060]	10.9	5.85	-0.898	0.0402	0.997192	yes	DOWN	N	N	N	Y	N	10.4	6.15
ENSRNOG00000010944.L01	192235	Hyou1	hypoxia up-regulated 1 [Source:RGD Symbol;Acc:621146]	44.3	24.8	-0.838	0.0403	0.997192	yes	DOWN	N	N	N	Y	N	42.3	26.07
ENSRNOG00000010543.L01	315548	Srpr	signal recognition particle receptor ('docking protein') [Source:RGD Symbol;Acc:1311504]	113	60.6	-0.903	0.0403	0.997192	yes	DOWN	N	N	N	Y	N	107.95	63.63
ENSRNOG00000018574.L01	681023	Qsox2	quiescin Q6 sulfhydryl oxidase 2 [Source:RGD Symbol;Acc:1584720]	8.84	4.58	-0.947	0.04035	0.997192	yes	DOWN	N	N	N	Y	N	8.43	4.82
ENSRNOG00000047314.L01	24834	Tk1	thymidine kinase 1, soluble [Source:RGD Symbol;Acc:621014]	9.74	3.49	-1.48	0.0404	0.997192	yes	DOWN	N	N	N	Y	Y	9.29	3.67
ENSRNOG00000002302.L01	289596	Corin	corin, serine peptidase [Source:RGD Symbol;Acc:727887]	1.54	0.486	-1.67	0.0404	0.997192	yes	DOWN	N	N	N	Y	Y	1.47	0.51
ENSRNOG00000028415	64515	Cdc20	cell division cycle 20 [Source:RGD Symbol;Acc:620477]	7.68	3.12	-1.3	0.04045	0.997192	yes	DOWN	N	N	N	Y	Y	7.32	3.28
ENSRNOG00000013167	100912122	Hmgb2	high mobility group box 2 [Source:RGD Symbol;Acc:69291]	58.4	31.5	-0.89	0.04055	0.997192	yes	DOWN	N	N	N	Y	N	55.72	33.14
ENSRNOG00000005115	304648	Asf1b	anti-silencing function 1B histone chaperone [Source:RGD Symbol;Acc:1304918]	2.98	0.759	-1.97	0.0409	0.997192	yes	DOWN	N	N	N	Y	Y	2.84	0.8
ENSRNOG00000038297.L01	500685	Plekhd1	pleckstrin homology domain containing, family D (with coiled-coil domains) member 1 [Source:RGD Symbol;Acc:1566112]	3.52	1.29	-1.45	0.0413	0.997192	yes	DOWN	N	N	N	Y	Y	3.36	1.36
ENSRNOG00000048953.L01	100911797	Spink5	serine peptidase inhibitor, Kazal type 5 [Source:RGD Symbol;Acc:1306540]	1.62	0.566	-1.51	0.04145	0.997192	yes	DOWN	N	N	N	Y	Y	1.54	0.6
ENSRNOG00000008173.L01	315427	Sesn3	sestrin 3 [Source:RGD Symbol;Acc:1309470]	36.5	18	-1.02	0.04165	0.997192	yes	DOWN	N	N	N	Y	Y	34.81	18.92
ENSRNOG00000015465.L01	308064	Cep72	centrosomal protein 72 [Source:RGD Symbol;Acc:1566336]	2.03	0.637	-1.67	0.042	0.997192	yes	DOWN	N	N	N	Y	Y	1.93	0.67
ENSRNOG00000018580.L01	308565	Klk8	kallikrein related-peptidase 8 [Source:RGD Symbol;Acc:1305998]	1.64	0.201	-3.03	0.042	0.997192	yes	DOWN	N	N	N	Y	Y	1.56	0.21
ENSRNOG00000005660.L01	500638	Fam110c	family with sequence similarity 110, member C [Source:RGD Symbol;Acc:1564713]	18.8	10.3	-0.872	0.04235	0.997192	yes	DOWN	N	N	N	Y	N	17.93	10.79
ENSRNOG00000024535.L01	287476	Zzef1	zinc finger, ZZ-type with EF hand domain 1 [Source:RGD Symbol;Acc:1311189]	74	37.3	-0.988	0.0426	0.997192	yes	DOWN	N	N	N	Y	N	70.57	39.2
ENSRNOG00000002711.L01	304951	Nuf2	NUF2, NDC80 kinetochore complex component [Source:RGD Symbol;Acc:1307952]	4.06	1.35	-1.59	0.0427	0.997192	yes	DOWN	N	N	N	Y	Y	3.87	1.42
ENSRNOG00000004275.L01	317470	Egfl6	EGF-like-domain, multiple 6 [Source:RGD Symbol;Acc:1563321]	21	11.5	-0.87	0.0427	0.997192	yes	DOWN	N	N	N	Y	N	20.04	12.08
ENSRNOG00000007944.L01	297504	Edem1	ER degradation enhancer, mannosidase alpha-like 1 [Source:RGD Symbol;Acc:1563633]	21.6	12.2	-0.824	0.04295	0.997192	yes	DOWN	N	N	N	Y	N	20.59	12.81
ENSRNOG00000003613.L02	54252	Mid1	midline 1 [Source:RGD Symbol;Acc:2640]	7.7	3.93	-0.97	0.043	0.997192	yes	DOWN	N	N	N	Y	N	7.35	4.13
ENSRNOG00000007533.L01	50645	Rab27a	RAB27A, member RAS oncogene family [Source:RGD Symbol;Acc:620918]	40	22.5	-0.831	0.04315	0.997192	yes	DOWN	N	N	N	Y	N	38.15	23.63
ENSRNOG00000031896	500972	Stt3a	STT3A, subunit of the oligosaccharyltransferase complex (catalytic) [Source:RGD Symbol;Acc:1565793]	32	17.9	-0.84	0.0432	0.997192	yes	DOWN	N	N	N	Y	N	30.52	18.78
ENSRNOG00000014478.L01	306022	Fndc3a	fibronectin type III domain containing 3a [Source:RGD Symbol;Acc:1304736]	17	9.49	-0.839	0.0433	0.997192	yes	DOWN	N	N	N	Y	N	16.19	9.96
ENSRNOG00000005715.L01	286994	Lgr4	leucine-rich repeat-containing G protein-coupled receptor 4 [Source:RGD Symbol;Acc:628615]	38.2	21.4	-0.839	0.0438	0.997192	yes	DOWN	N	N	N	Y	N	36.47	22.45
ENSRNOG00000012442.L01	308797	Cemip	cell migration inducing protein, hyaluronan binding [Source:RGD Symbol;Acc:1305254]	0.796	0.226	-1.82	0.04385	0.997192	yes	DOWN	N	N	N	Y	Y	0.76	0.24
ENSRNOG00000007320.L01	289949	Fam3d	family with sequence similarity 3, member D [Source:RGD Symbol;Acc:1305512]	121	61	-0.987	0.0439	0.997192	yes	DOWN	N	N	N	Y	N	115.29	64.11
ENSRNOG00000013296	295037	Mgst2	microsomal glutathione S-transferase 2 [Source:RGD Symbol;Acc:1311218]	161	87.7	-0.872	0.0439	0.997192	yes	DOWN	N	N	N	Y	N	153.15	92.18
ENSRNOG00000001928.L01	25466	Il1rap	interleukin 1 receptor accessory protein [Source:RGD Symbol;Acc:2893]	14.7	7.45	-0.982	0.0441	0.997192	yes	DOWN	N	N	N	Y	N	14.04	7.83
ENSRNOG00000037562.L01	691556	Zbtb42	zinc finger and BTB domain containing 42 [Source:RGD Symbol;Acc:1582758]	10.3	5.22	-0.976	0.04445	0.997192	yes	DOWN	N	N	N	Y	N	9.78	5.48
ENSRNOG00000010630.L01	293118	Prcp	prolylcarboxypeptidase (angiotensinase C) [Source:RGD Symbol;Acc:1307842]	12.9	6.51	-0.993	0.0445	0.997192	yes	DOWN	N	N	N	Y	N	12.35	6.84
ENSRNOG00000010352.L01	63880	Dnajc3	DnaJ (Hsp40) homolog, subfamily C, member 3 [Source:RGD Symbol;Acc:708518]	43.7	22.2	-0.975	0.04475	0.997192	yes	DOWN	N	N	N	Y	N	41.68	23.38
ENSRNOG00000007805.L01	296344	Mybl2	myeloblastosis oncogene-like 2 [Source:RGD Symbol;Acc:1308474]	2.63	0.896	-1.55	0.045	0.997192	yes	DOWN	N	N	N	Y	Y	2.51	0.94
ENSRNOG00000025121	289733	Pla2g3	phospholipase A2, group III [Source:RGD Symbol;Acc:1305323]	1.08	0.228	-2.24	0.0462	0.997192	yes	DOWN	N	N	N	Y	Y	1.03	0.24
ENSRNOG00000001912.L01	364134	Tecrl	trans-2,3-enoyl-CoA reductase-like [Source:RGD Symbol;Acc:1304608]	1.53	0.41	-1.9	0.04625	0.997192	yes	DOWN	N	N	N	Y	Y	1.46	0.43
ENSRNOG00000025581.L01	307988	Vwa2	von Willebrand factor A domain containing 2 [Source:RGD Symbol;Acc:1562000]	5.94	2.85	-1.06	0.04645	0.997192	yes	DOWN	N	N	N	Y	Y	5.67	2.99
ENSRNOG00000014130	498709	LOC100362620	CDC28 protein kinase regulatory subunit 2 [Source:RGD Symbol;Acc:2324338]	18.9	6.8	-1.47	0.0465	0.997192	yes	DOWN	N	N	N	Y	Y	18.01	7.14
ENSRNOG00000000543.L01	79209	Frk	fyn-related Src family tyrosine kinase [Source:RGD Symbol;Acc:621423]	9.36	5.1	-0.877	0.04655	0.997192	yes	DOWN	N	N	N	Y	N	8.93	5.36
ENSRNOG00000018646	25433	Hbegf	heparin-binding EGF-like growth factor [Source:RGD Symbol;Acc:2526]	8.16	3.12	-1.39	0.04705	0.997192	yes	DOWN	N	N	N	Y	Y	7.79	3.28
ENSRNOG00000012054.L02	313564	Zmpste24	zinc metallopeptidase STE24 [Source:RGD Symbol;Acc:1305570]	19.5	10.3	-0.922	0.04725	0.997192	yes	DOWN	N	N	N	Y	N	18.65	10.84
ENSRNOG00000016456.L01	361749	Il33	interleukin 33 [Source:RGD Symbol;Acc:1311155]	23.7	13.2	-0.842	0.0473	0.997192	yes	DOWN	N	N	N	Y	N	22.63	13.9
ENSRNOG00000001628	25510	Pcp4	Purkinje cell protein 4 [Source:RGD Symbol;Acc:3271]	49.7	21.6	-1.2	0.0476	0.997192	yes	DOWN	N	N	N	Y	Y	47.44	22.68
ENSRNOG00000043390.L01	362910	Samd12	sterile alpha motif domain containing 12 [Source:RGD Symbol;Acc:1561402]	5.18	0.933	-2.47	0.0481	0.997192	yes	DOWN	N	N	N	Y	Y	4.94	0.98
ENSRNOG00000021011.L01	58924	Fut2	fucosyltransferase 2 (secretor status included) [Source:RGD Symbol;Acc:2639]	30.7	17.3	-0.825	0.0482	0.997192	yes	DOWN	N	N	N	Y	N	29.28	18.22
ENSRNOG00000012655.L01	361886	Adamts6	ADAM metallopeptidase with thrombospondin type 1 motif, 6 [Source:RGD Symbol;Acc:1307678]	2.66	0.855	-1.64	0.04825	0.997192	yes	DOWN	N	N	N	Y	Y	2.53	0.9
ENSRNOG00000007546.L01	25612	Asns	asparagine synthetase (glutamine-hydrolyzing) [Source:RGD Symbol;Acc:2162]	59.4	32.6	-0.866	0.04855	0.997192	yes	DOWN	N	N	N	Y	N	56.63	34.24
ENSRNOG00000008986.L01	290396	Diaph3	diaphanous-related formin 3 [Source:RGD Symbol;Acc:1593287]	3.08	1.27	-1.27	0.04865	0.997192	yes	DOWN	N	N	N	Y	Y	2.94	1.34
ENSRNOG00000010274.L01	295107	Smc4	structural maintenance of chromosomes 4 [Source:RGD Symbol;Acc:1306680]	12.7	6.6	-0.942	0.0487	0.997192	yes	DOWN	N	N	N	Y	N	12.1	6.93
ENSRNOG00000006058	300017	Lypd2	Ly6/Plaur domain containing 2 [Source:RGD Symbol;Acc:1307892]	369	161	-1.2	0.04945	0.997192	yes	DOWN	N	N	N	Y	Y	352.27	169.48
ENSRNOG00000031040.L01	100912795	Troap	trophinin associated protein [Source:RGD Symbol;Acc:1306870]	3.13	0.989	-1.66	0.04955	0.997192	yes	DOWN	N	N	N	Y	Y	2.99	1.04
ENSRNOG00000019939.L01	64033	Ccnd2	cyclin D2 [Source:RGD Symbol;Acc:621083]	79.7	42.6	-0.902	0.04965	0.997192	yes	DOWN	N	N	N	Y	N	75.98	44.79
ENSRNOG00000004959.L01	289820	Actr2	ARP2 actin-related protein 2 homolog (yeast) [Source:RGD Symbol;Acc:1310826]	77.4	42.8	-0.855	0.04985	0.997192	yes	DOWN	N	N	N	Y	N	73.85	45
ENSRNOG00000046834.L01	24232	C3	complement component 3 [Source:RGD Symbol;Acc:2232]	4.5	26.7	2.57	5e-05	0.0262427	yes	UP	Y	Y	Y	Y	Y	4.29	28.03
ENSRNOG00000021027.L01	24309	Dbp	D site of albumin promoter (albumin D-box) binding protein [Source:RGD Symbol;Acc:2491]	20	93	2.22	5e-05	0.0262427	yes	UP	Y	Y	Y	Y	Y	19.1	97.78
ENSRNOG00000029886	25632	Hba1	hemoglobin, alpha 1 [Source:RGD Symbol;Acc:2782]	447	1950	2.13	5e-05	0.0262427	yes	UP	Y	Y	Y	Y	Y	426.35	2052.49
ENSRNOG00000006120.L01	29499	Shh	sonic hedgehog [Source:RGD Symbol;Acc:3673]	0	0.905	inf	5e-05	0.0262427	yes	UP	Y	Y	Y	Y	Y	0	0.95
ENSRNOG00000010665.L01	287673	Ccr7	chemokine (C-C motif) receptor 7 [Source:RGD Symbol;Acc:735151]	0	1.07	inf	5e-05	0.0262427	yes	UP	Y	Y	Y	Y	Y	0	1.13
ENSRNOG00000019627.L01	292879	Mybpc2	myosin binding protein C, fast-type [Source:RGD Symbol;Acc:1311596]	26.2	95.8	1.87	5e-05	0.0262427	yes	UP	Y	Y	Y	Y	Y	25.01	100.67
ENSRNOG00000018978.L01	293591	Cd163l1	CD163 molecule-like 1 [Source:RGD Symbol;Acc:1307378]	2.74	22.9	3.06	5e-05	0.0262427	yes	UP	Y	Y	Y	Y	Y	2.61	24.02
ENSRNOG00000047321	360504	Hba2	hemoglobin, alpha 2 [Source:RGD Symbol;Acc:1359364]	241	953	1.98	5e-05	0.0262427	yes	UP	Y	Y	Y	Y	Y	229.92	1001.91
ENSRNOG00000047098	361619	Hbb-b1	hemoglobin, beta adult major chain [Source:RGD Symbol;Acc:1595848]	34	191	2.49	5e-05	0.0262427	yes	UP	Y	Y	Y	Y	Y	32.44	201.11
ENSRNOG00000045885	100365810	LOC100365810	40S ribosomal protein S17-like [Source:RGD Symbol;Acc:2318277]	0	17.4	inf	5e-05	0.0262427	yes	UP	Y	Y	Y	Y	Y	0	18.25
ENSRNOG00000031249.L01	80900	Slco1a2	solute carrier organic anion transporter family, member 1A2 [Source:RGD Symbol;Acc:70985]	5.62	25.7	2.19	0.0001	0.04782	yes	UP	Y	Y	Y	Y	Y	5.36	26.98
ENSRNOG00000028041.L01	171409	Tnnt1	troponin T type 1 (skeletal, slow) [Source:RGD Symbol;Acc:621852]	63.2	184	1.54	0.00015	0.0632912	yes	UP	N	Y	Y	Y	Y	60.25	193.77
ENSRNOG00000024508.L01	690326	LOC690326	hypothetical protein LOC690326 [Source:RGD Symbol;Acc:1597362]	0	1.79	inf	0.00015	0.0632912	yes	UP	N	Y	Y	Y	Y	0	1.88
ENSRNOG00000048673.L01	114247	Slfn3	schlafen 3 [Source:RGD Symbol;Acc:620455]	2.35	8.69	1.89	0.0002	0.0755053	yes	UP	N	Y	Y	Y	Y	2.24	9.13
ENSRNOG00000026493.L01	361276	Cdnf	cerebral dopamine neurotrophic factor [Source:RGD Symbol;Acc:1307600]	2.4	12.4	2.37	0.0002	0.0755053	yes	UP	N	Y	Y	Y	Y	2.29	13.02
ENSRNOG00000028656.L01	301521	Ccdc108	coiled-coil domain containing 108 [Source:RGD Symbol;Acc:1563002]	8.15	24.3	1.57	0.00025	0.0867702	yes	UP	N	Y	Y	Y	Y	7.78	25.53
ENSRNOG00000005659.L01	114592	Aurkb	aurora kinase B [Source:RGD Symbol;Acc:621625]	40.2	121	1.59	0.00055	0.146117	yes	UP	N	N	Y	Y	Y	38.31	127.21
ENSRNOG00000004273.L01	293618	Ifitm1	interferon induced transmembrane protein 1 [Source:RGD Symbol;Acc:1307601]	58.9	193	1.71	0.00055	0.146117	yes	UP	N	N	Y	Y	Y	56.15	202.33
ENSRNOG00000047551	100911615	Pnpla2	patatin-like phospholipase domain containing 2 [Source:RGD Symbol;Acc:1309044]	0	0.768	inf	0.0006	0.153707	yes	UP	N	N	Y	Y	Y	0	0.81
ENSRNOG00000020484.L01	365391	Trpm5	transient receptor potential cation channel, subfamily M, member 5 [Source:RGD Symbol;Acc:1310620]	4.28	13	1.61	0.00065	0.155415	yes	UP	N	N	Y	Y	Y	4.08	13.68
ENSRNOG00000038775.L01	499065	Tarm1	T cell-interacting, activating receptor on myeloid cells 1 [Source:RGD Symbol;Acc:1564272]	0	0.818	inf	0.00065	0.155415	yes	UP	N	N	Y	Y	Y	0	0.86
ENSRNOG00000005947	114248	Pde6h	phosphodiesterase 6H, cGMP-specific, cone, gamma [Source:RGD Symbol;Acc:70933]	0	2.73	inf	0.00105	0.172428	yes	UP	N	N	Y	Y	Y	0	2.87
ENSRNOG00000020165	293522	Ahsp	alpha hemoglobin stabilizing protein [Source:RGD Symbol;Acc:1306725]	0	2.14	inf	0.00105	0.172428	yes	UP	N	N	Y	Y	Y	0	2.25
ENSRNOG00000020254.L01	63840	Per2	period circadian clock 2 [Source:RGD Symbol;Acc:61945]	7	19.3	1.46	0.00125	0.172428	yes	UP	N	N	Y	Y	Y	6.68	20.3
ENSRNOG00000013605.L01	691161	Sh2d6	SH2 domain containing 6 [Source:RGD Symbol;Acc:1587427]	15.5	47.8	1.63	0.00135	0.182708	yes	UP	N	N	Y	Y	Y	14.75	50.28
ENSRNOG00000015331.L01	500311	Gdf3	growth differentiation factor 3 [Source:RGD Symbol;Acc:1564178]	0	2.69	inf	0.00165	0.201741	yes	UP	N	N	Y	Y	Y	0	2.83
ENSRNOG00000019120.L01	24450	Hmgcs2	3-hydroxy-3-methylglutaryl-CoA synthase 2 (mitochondrial) [Source:RGD Symbol;Acc:2804]	4.21	15.9	1.92	0.00175	0.206913	yes	UP	N	N	Y	Y	Y	4.02	16.72
ENSRNOG00000002800.L01	302421	Gdpd2	glycerophosphodiester phosphodiesterase domain containing 2 [Source:RGD Symbol;Acc:1560780]	9.01	25.6	1.51	0.002	0.227714	yes	UP	N	N	Y	Y	Y	8.6	26.93
ENSRNOG00000047307.L01	313173	Cntfr	ciliary neurotrophic factor receptor [Source:RGD Symbol;Acc:1303100]	5.01	16.2	1.69	0.0027	0.290507	yes	UP	N	N	Y	Y	Y	4.77	17.02
ENSRNOG00000028900.L01	24299	Cyp2a3	cytochrome P450, family 2, subfamily a, polypeptide 3 [Source:RGD Symbol;Acc:2465]	54	143	1.41	0.00275	0.294414	yes	UP	N	N	Y	Y	Y	51.52	150.35
ENSRNOG00000017842.L01	24768	Scnn1g	sodium channel, non-voltage-gated 1, gamma subunit [Source:RGD Symbol;Acc:3641]	1.4	6.12	2.12	0.00285	0.297714	yes	UP	N	N	Y	Y	Y	1.34	6.44
ENSRNOG00000007574.L01	29511	Padi2	peptidyl arginine deiminase, type II [Source:RGD Symbol;Acc:3288]	9.05	21.8	1.27	0.00285	0.297714	yes	UP	N	N	Y	Y	Y	8.63	22.86
ENSRNOG00000045989	287167	LOC287167	globin, alpha [Source:RGD Symbol;Acc:1359209]	10.2	52.4	2.36	0.0032	0.324815	yes	UP	N	N	Y	Y	Y	9.72	55.09
ENSRNOG00000006110.L01	297748	Jph1	junctophilin 1 [Source:RGD Symbol;Acc:1308789]	6.63	17.2	1.38	0.0033	0.330292	yes	UP	N	N	Y	Y	Y	6.32	18.12
ENSRNOG00000001036.L01	288478	Rsph10b	radial spoke head 10 homolog B (Chlamydomonas) [Source:RGD Symbol;Acc:1311893]	3.38	10.3	1.6	0.0038	0.366691	yes	UP	N	N	Y	Y	Y	3.22	10.8
ENSRNOG00000018413.L01	78962	Per3	period circadian clock 3 [Source:RGD Symbol;Acc:621581]	12.8	29.1	1.19	0.0045	0.380911	yes	UP	N	N	Y	Y	Y	12.2	30.59
ENSRNOG00000006663.L01	115771	Usp2	ubiquitin specific peptidase 2 [Source:RGD Symbol;Acc:621073]	5.88	14.8	1.33	0.0045	0.380911	yes	UP	N	N	Y	Y	Y	5.6	15.56
ENSRNOG00000011518	501718	Dusp26	dual specificity phosphatase 26 (putative) [Source:RGD Symbol;Acc:1310090]	7.92	22.9	1.53	0.0049	0.380911	yes	UP	N	N	Y	Y	Y	7.55	24.04
ENSRNOG00000009565	89813	Pdk4	pyruvate dehydrogenase kinase, isozyme 4 [Source:RGD Symbol;Acc:69061]	53.7	124	1.21	0.0052	0.380911	yes	UP	N	N	Y	Y	Y	51.18	130.81
ENSRNOG00000025860.L01	291853	Ccdc135	coiled-coil domain containing 135 [Source:RGD Symbol;Acc:1565601]	1.7	6.85	2.01	0.0052	0.380911	yes	UP	N	N	Y	Y	Y	1.62	7.2
ENSRNOG00000024931.L01	293698	Ccdc88b	coiled-coil domain containing 88B [Source:RGD Symbol;Acc:1311475]	1	3.52	1.81	0.0052	0.380911	yes	UP	N	N	Y	Y	Y	0.96	3.7
ENSRNOG00000010165.L01	299339	Tnfaip2	tumor necrosis factor, alpha-induced protein 2 [Source:RGD Symbol;Acc:1594556]	9.7	23.1	1.25	0.00555	0.380911	yes	UP	N	N	Y	Y	Y	9.26	24.31
ENSRNOG00000033110.L01	685899	Svep1	sushi, von Willebrand factor type A, EGF and pentraxin domain containing 1 [Source:RGD Symbol;Acc:1588987]	2.46	5.71	1.22	0.00555	0.380911	yes	UP	N	N	Y	Y	Y	2.34	6
ENSRNOG00000025110.L01	293449	Vwa3a	von Willebrand factor A domain containing 3A [Source:RGD Symbol;Acc:1311670]	5.31	12.9	1.28	0.0057	0.380911	yes	UP	N	N	Y	Y	Y	5.07	13.57
ENSRNOG00000048961.L01	117095	Bhlhe41	basic helix-loop-helix family, member e41 [Source:RGD Symbol;Acc:70900]	2.69	8	1.57	0.0058	0.380911	yes	UP	N	N	Y	Y	Y	2.56	8.41
ENSRNOG00000003336.L01	83708	Mybph	myosin binding protein H [Source:RGD Symbol;Acc:620287]	22.3	49	1.14	0.0063	0.380911	yes	UP	N	N	Y	Y	Y	21.26	51.53
ENSRNOG00000008847.L01	79217	Gja3	gap junction protein, alpha 3 [Source:RGD Symbol;Acc:621820]	1.33	5.21	1.97	0.00655	0.380911	yes	UP	N	N	Y	Y	Y	1.27	5.48
ENSRNOG00000007113.L01	289785	Myo1g	myosin IG [Source:RGD Symbol;Acc:1306016]	0.662	3.24	2.29	0.0066	0.380911	yes	UP	N	N	Y	Y	Y	0.63	3.41
ENSRNOG00000021380.L01	303671	Fads6	fatty acid desaturase 6 [Source:RGD Symbol;Acc:1311950]	1.74	5.94	1.77	0.007	0.380911	yes	UP	N	N	Y	Y	Y	1.66	6.24
ENSRNOG00000040171.L01	681383	LOC681383	similar to Protein C10orf11 homolog [Source:RGD Symbol;Acc:1596707]	4.6	26	2.5	0.0072	0.380911	yes	UP	N	N	Y	Y	Y	4.39	27.36
ENSRNOG00000048769.L01	685440	Nek5	NIMA-related kinase 5 [Source:RGD Symbol;Acc:1593817]	2.94	8.2	1.48	0.00755	0.380911	yes	UP	N	N	Y	Y	Y	2.8	8.62
ENSRNOG00000007545.L01	362850	Angptl4	angiopoietin-like 4 [Source:RGD Symbol;Acc:735058]	2.41	9.17	1.93	0.0077	0.380911	yes	UP	N	N	Y	Y	Y	2.3	9.64
ENSRNOG00000037289	503227	Iqcf1	IQ motif containing F1 [Source:RGD Symbol;Acc:1565640]	0	1.15	inf	0.0077	0.380911	yes	UP	N	N	Y	Y	Y	0	1.21
ENSRNOG00000046276	24583	Myh3	myosin, heavy chain 3, skeletal muscle, embryonic [Source:RGD Symbol;Acc:3138]	0.419	1.73	2.05	0.00775	0.38163	yes	UP	N	N	Y	Y	Y	0.4	1.82
ENSRNOG00000038074	498555	LOC498555	similar to 60S acidic ribosomal protein P2 [Source:RGD Symbol;Acc:1590791]	116	267	1.2	0.00785	0.385672	yes	UP	N	N	Y	Y	Y	111.03	280.85
ENSRNOG00000008235.L01	117558	Mylk2	myosin light chain kinase 2 [Source:RGD Symbol;Acc:620934]	7.37	16.8	1.18	0.0079	0.387244	yes	UP	N	N	Y	Y	Y	7.03	17.61
ENSRNOG00000015718.L01	300990	RGD1307461	similar to RIKEN cDNA 6430571L13 gene; similar to g20 protein [Source:RGD Symbol;Acc:1307461]	4.04	9.79	1.28	0.00835	0.405606	yes	UP	N	N	Y	Y	Y	3.85	10.29
ENSRNOG00000010079	54232	Car3	carbonic anhydrase 3 [Source:RGD Symbol;Acc:2241]	1.41	7.01	2.31	0.00865	0.416419	yes	UP	N	N	Y	Y	Y	1.35	7.37
ENSRNOG00000017395.L01	79107	Duox2	dual oxidase 2 [Source:RGD Symbol;Acc:628761]	26.4	60.8	1.21	0.0088	0.417108	yes	UP	N	N	Y	Y	Y	25.15	63.94
ENSRNOG00000022523.L01	361810	Fkbp5	FK506 binding protein 5 [Source:RGD Symbol;Acc:1309155]	3.39	9.18	1.44	0.00925	0.433662	yes	UP	N	N	Y	Y	Y	3.24	9.65
ENSRNOG00000037673	100362069	RGD1565183	similar to ribosomal protein L28 [Source:RGD Symbol;Acc:1565183]	4.5	28.9	2.68	0.00925	0.433662	yes	UP	N	N	Y	Y	Y	4.29	30.43
ENSRNOG00000008168.L01	282582	Wnt5b	wingless-type MMTV integration site family, member 5B [Source:RGD Symbol;Acc:628850]	5.51	13.8	1.33	0.0094	0.437832	yes	UP	N	N	Y	Y	Y	5.25	14.54
ENSRNOG00000006930.L01	686019	Casq1	calsequestrin 1 (fast-twitch, skeletal muscle) [Source:RGD Symbol;Acc:1586677]	132	299	1.18	0.00965	0.446577	yes	UP	N	N	Y	Y	Y	125.52	314.25
ENSRNOG00000027489.L01	498194	Mn1	meningioma 1 [Source:RGD Symbol;Acc:1565571]	3.78	8.19	1.11	0.0098	0.450612	yes	UP	N	N	Y	Y	Y	3.61	8.61
ENSRNOG00000006741.L01	288907	Podnl1	podocan-like 1 [Source:RGD Symbol;Acc:1307753]	0.174	3.55	4.35	0.0101	0.46047	yes	UP	N	N	N	Y	Y	0.17	3.73
ENSRNOG00000022178.L01	295980	Dcdc5	doublecortin domain containing 5 [Source:RGD Symbol;Acc:1562221]	1.81	7.08	1.97	0.0101	0.46047	yes	UP	N	N	N	Y	Y	1.72	7.44
ENSRNOG00000033266.L02	287106	Prss30	protease, serine, 30 [Source:RGD Symbol;Acc:735142]	4.11	12.4	1.59	0.0107	0.473066	yes	UP	N	N	N	Y	Y	3.92	13.05
ENSRNOG00000011205	25542	Ccl3	chemokine (C-C motif) ligand 3 [Source:RGD Symbol;Acc:3647]	0	0.606	inf	0.01075	0.473066	yes	UP	N	N	N	Y	Y	0	0.64
ENSRNOG00000020733	316010	Camp	cathelicidin antimicrobial peptide [Source:RGD Symbol;Acc:1559878]	0	0.922	inf	0.01075	0.473066	yes	UP	N	N	N	Y	Y	0	0.97
ENSRNOG00000027550.L01	361508	Mzf1	myeloid zinc finger 1 [Source:RGD Symbol;Acc:1308391]	2.11	5.95	1.49	0.01125	0.490058	yes	UP	N	N	N	Y	Y	2.02	6.25
ENSRNOG00000011754.L01	306616	Myom2	myomesin 2 [Source:RGD Symbol;Acc:631437]	9.67	19.9	1.04	0.0115	0.498928	yes	UP	N	N	N	Y	Y	9.22	20.96
ENSRNOG00000003217.L01	245955	Lgals3bp	lectin, galactoside-binding, soluble, 3 binding protein [Source:RGD Symbol;Acc:620837]	17.6	36.9	1.06	0.01175	0.508749	yes	UP	N	N	N	Y	Y	16.83	38.78
ENSRNOG00000003221.L01	81523	Myoc	myocilin, trabecular meshwork inducible glucocorticoid response [Source:RGD Symbol;Acc:620430]	36.1	82.3	1.19	0.012	0.513376	yes	UP	N	N	N	Y	Y	34.38	86.47
ENSRNOG00000019745.L01	171009	Actn3	actinin alpha 3 [Source:RGD Symbol;Acc:621792]	67.7	149	1.14	0.0122	0.516795	yes	UP	N	N	N	Y	Y	64.57	156.33
ENSRNOG00000007765.L01	295691	Frzb	frizzled-related protein [Source:RGD Symbol;Acc:1311315]	7.04	16.2	1.2	0.0126	0.528574	yes	UP	N	N	N	Y	Y	6.72	17.05
ENSRNOG00000017178	292017	Hydin	Hydin, axonemal central pair apparatus protein [Source:RGD Symbol;Acc:1562254]	0.923	2.4	1.38	0.0131	0.533915	yes	UP	N	N	N	Y	Y	0.88	2.53
ENSRNOG00000025014	303815	RGD1563956	similar to 60S ribosomal protein L12 [Source:RGD Symbol;Acc:1563956]	0	0.873	inf	0.0131	0.533915	yes	UP	N	N	N	Y	Y	0	0.92
ENSRNOG00000049541	65155	Alas1	aminolevulinate, delta-, synthase 1 [Source:RGD Symbol;Acc:68392]	45.5	96	1.08	0.01315	0.533915	yes	UP	N	N	N	Y	Y	43.43	100.87
ENSRNOG00000033517	100360791	LOC100360791	tumor protein, translationally-controlled 1 [Source:RGD Symbol;Acc:2321467]	2.63	11.6	2.14	0.01315	0.533915	yes	UP	N	N	N	Y	Y	2.51	12.25
ENSRNOG00000022242.L01	246759	Cxcl9	chemokine (C-X-C motif) ligand 9 [Source:RGD Symbol;Acc:628798]	0.518	4.12	2.99	0.01325	0.536962	yes	UP	N	N	N	Y	Y	0.49	4.33
ENSRNOG00000020992	140927	Selenbp1	selenium binding protein 1 [Source:RGD Symbol;Acc:620571]	20.8	43.6	1.07	0.01335	0.539997	yes	UP	N	N	N	Y	Y	19.86	45.81
ENSRNOG00000046299.L01	100911417	Atp5f1	ATP synthase, H+ transporting, mitochondrial Fo complex, subunit B1 [Source:RGD Symbol;Acc:620041]	0	0.739	inf	0.0137	0.549974	yes	UP	N	N	N	Y	Y	0	0.78
ENSRNOG00000012464.L01	24172	Adh1	alcohol dehydrogenase 1 (class I) [Source:RGD Symbol;Acc:2044]	9.02	21.8	1.27	0.01475	0.579207	yes	UP	N	N	N	Y	Y	8.6	22.86
ENSRNOG00000017212.L01	313722	Spsb1	splA/ryanodine receptor domain and SOCS box containing 1 [Source:RGD Symbol;Acc:1309319]	6.38	14.2	1.15	0.0148	0.580111	yes	UP	N	N	N	Y	Y	6.08	14.88
ENSRNOG00000019342	83783	Sult1a1	sulfotransferase family, cytosolic, 1A, phenol-preferring, member 1 [Source:RGD Symbol;Acc:3767]	20	45.2	1.18	0.0152	0.588289	yes	UP	N	N	N	Y	Y	19.07	47.55
ENSRNOG00000006767.L01	296257	Cst7	cystatin F (leukocystatin) [Source:RGD Symbol;Acc:1309154]	0.891	4.74	2.41	0.01545	0.596891	yes	UP	N	N	N	Y	Y	0.85	4.98
ENSRNOG00000021789	691300	RGD1565323	similar to OTTMUSP00000000621 [Source:RGD Symbol;Acc:1565323]	2.85	15.3	2.42	0.01555	0.598605	yes	UP	N	N	N	Y	Y	2.72	16.05
ENSRNOG00000050979.L01	691572	Ubap1l	ubiquitin associated protein 1-like [Source:RGD Symbol;Acc:1582742]	0.558	3.74	2.74	0.0156	0.599458	yes	UP	N	N	N	Y	Y	0.53	3.93
ENSRNOG00000046231.L01	682930	Cacna1s	calcium channel, voltage-dependent, L type, alpha 1S subunit [Source:RGD Symbol;Acc:70983]	25	50.6	1.01	0.0158	0.606061	yes	UP	N	N	N	Y	Y	23.89	53.19
ENSRNOG00000028077.L01	363782	Cfap44	cilia and flagella associated protein 44 [Source:RGD Symbol;Acc:1559942]	3.66	12.6	1.78	0.0162	0.613746	yes	UP	N	N	N	Y	Y	3.49	13.22
ENSRNOG00000012181	24539	Lpl	lipoprotein lipase [Source:RGD Symbol;Acc:3017]	21.4	43.2	1.01	0.01685	0.631699	yes	UP	N	N	N	Y	Y	20.39	45.39
ENSRNOG00000001873.L01	25041	P2rx6	purinergic receptor P2X, ligand-gated ion channel, 6 [Source:RGD Symbol;Acc:3243]	7.92	18.1	1.2	0.0176	0.651866	yes	UP	N	N	N	Y	Y	7.55	19.06
ENSRNOG00000024331.L01	365227	Upk1a	uroplakin 1A [Source:RGD Symbol;Acc:1309849]	7.38	19.3	1.39	0.01805	0.6617	yes	UP	N	N	N	Y	Y	7.03	20.28
ENSRNOG00000031230	100134871	LOC100134871	beta globin minor gene [Source:RGD Symbol;Acc:2290038]	3.94	20.1	2.35	0.0181	0.662405	yes	UP	N	N	N	Y	Y	3.76	21.17
ENSRNOG00000007957.L01	287609	Bzrap1	benzodiazepine receptor (peripheral) associated protein 1 [Source:RGD Symbol;Acc:708563]	3.1	6.52	1.07	0.0182	0.662959	yes	UP	N	N	N	Y	Y	2.95	6.85
ENSRNOG00000021855.L01	296952	Kcp	kielin/chordin-like protein [Source:RGD Symbol;Acc:1561119]	4.3	12.8	1.58	0.01825	0.662959	yes	UP	N	N	N	Y	Y	4.1	13.48
ENSRNOG00000021200	310681	Hfe2	hemochromatosis type 2 (juvenile) [Source:RGD Symbol;Acc:1310195]	44.1	86.1	0.965	0.0183	0.662959	yes	UP	N	N	N	Y	N	42.06	90.46
ENSRNOG00000048564	100364427	LOC100364427	ribosomal protein S12-like [Source:RGD Symbol;Acc:2321033]	1.59	24.8	3.96	0.0183	0.662959	yes	UP	N	N	N	Y	Y	1.51	26.03
ENSRNOG00000010798.L01	364403	Blk	BLK proto-oncogene, Src family tyrosine kinase [Source:RGD Symbol;Acc:1308859]	0.563	2.89	2.36	0.01855	0.669761	yes	UP	N	N	N	Y	Y	0.54	3.04
ENSRNOG00000043451	25353	Spp1	secreted phosphoprotein 1 [Source:RGD Symbol;Acc:3752]	10.2	23.1	1.18	0.01865	0.672243	yes	UP	N	N	N	Y	Y	9.71	24.24
ENSRNOG00000043186.L01	685567	Ppil6	peptidylprolyl isomerase (cyclophilin)-like 6 [Source:RGD Symbol;Acc:1592581]	1.87	5.61	1.58	0.0195	0.697044	yes	UP	N	N	N	Y	Y	1.79	5.89
ENSRNOG00000050430.L01	25156	Vav1	vav 1 guanine nucleotide exchange factor [Source:RGD Symbol;Acc:3951]	1.22	3.39	1.48	0.0197	0.699545	yes	UP	N	N	N	Y	Y	1.16	3.56
ENSRNOG00000001311.L01	690407	Rab36	RAB36, member RAS oncogene family [Source:RGD Symbol;Acc:1596098]	2.43	7.76	1.68	0.0204	0.719652	yes	UP	N	N	N	Y	Y	2.31	8.16
ENSRNOG00000019213	60666	Gpd1	glycerol-3-phosphate dehydrogenase 1 (soluble) [Source:RGD Symbol;Acc:621381]	22	43.6	0.984	0.02055	0.722574	yes	UP	N	N	N	Y	N	21.03	45.83
ENSRNOG00000019472.L01	140473	Ackr2	atypical chemokine receptor 2 [Source:RGD Symbol;Acc:620323]	0.721	3.18	2.14	0.0206	0.723094	yes	UP	N	N	N	Y	Y	0.69	3.34
ENSRNOG00000018911.L01	117276	Pfkfb3	6-phosphofructo-2-kinase/fructose-2,6-biphosphatase 3 [Source:RGD Symbol;Acc:619776]	2.36	5.29	1.16	0.02075	0.723094	yes	UP	N	N	N	Y	Y	2.26	5.56
ENSRNOG00000024523.L01	360654	Dnai2	dynein, axonemal, intermediate chain 2 [Source:RGD Symbol;Acc:1359602]	1.46	4.3	1.56	0.02075	0.723094	yes	UP	N	N	N	Y	Y	1.4	4.52
ENSRNOG00000026679.L01	315611	Scn4b	sodium channel, voltage-gated, type IV, beta subunit [Source:RGD Symbol;Acc:631404]	19.7	38.4	0.961	0.0208	0.723094	yes	UP	N	N	N	Y	N	18.81	40.34
ENSRNOG00000023548.L01	316638	Sned1	sushi, nidogen and EGF-like domains 1 [Source:RGD Symbol;Acc:1566079]	10.8	24.6	1.19	0.021	0.72536	yes	UP	N	N	N	Y	Y	10.31	25.9
ENSRNOG00000019565.L01	295315	Tbx15	T-box 15 [Source:RGD Symbol;Acc:1308094]	24.6	52.1	1.08	0.02125	0.729312	yes	UP	N	N	N	Y	Y	23.43	54.73
ENSRNOG00000015581.L01	117250	Dnah6	dynein, axonemal, heavy chain 6 [Source:RGD Symbol;Acc:621797]	1.2	3.06	1.35	0.02135	0.729804	yes	UP	N	N	N	Y	Y	1.15	3.21
ENSRNOG00000012932.L01	499980	Ccdc146	coiled-coil domain containing 146 [Source:RGD Symbol;Acc:1559535]	2.72	7.02	1.37	0.0215	0.732055	yes	UP	N	N	N	Y	Y	2.6	7.38
ENSRNOG00000007332	171044	Sstr3	somatostatin receptor 3 [Source:RGD Symbol;Acc:620308]	0.26	1.23	2.24	0.0217	0.734217	yes	UP	N	N	N	Y	Y	0.25	1.29
ENSRNOG00000020339.L01	309459	Neurl1	neuralized E3 ubiquitin protein ligase 1 [Source:RGD Symbol;Acc:1307021]	3.97	8.83	1.15	0.0217	0.734217	yes	UP	N	N	N	Y	Y	3.78	9.28
ENSRNOG00000022957.L01	100188934	Ctxn3	cortexin 3 [Source:RGD Symbol;Acc:2300148]	0.391	3.14	3.01	0.0217	0.734217	yes	UP	N	N	N	Y	Y	0.37	3.3
ENSRNOG00000011250	368066	Inmt	indolethylamine N-methyltransferase [Source:RGD Symbol;Acc:1597087]	17.6	39	1.15	0.02205	0.743721	yes	UP	N	N	N	Y	Y	16.81	40.99
ENSRNOG00000008057.L01	300242	Krt7	keratin 7 [Source:RGD Symbol;Acc:1310865]	20.4	41.7	1.03	0.0223	0.749803	yes	UP	N	N	N	Y	Y	19.45	43.83
ENSRNOG00000012972.L01	25290	Alox5	arachidonate 5-lipoxygenase [Source:RGD Symbol;Acc:2096]	4.11	9.91	1.27	0.0224	0.75199	yes	UP	N	N	N	Y	Y	3.92	10.42
ENSRNOG00000021267.L01	362219	Gpcpd1	glycerophosphocholine phosphodiesterase GDE1 homolog (S. cerevisiae) [Source:RGD Symbol;Acc:735140]	18	36.3	1.01	0.02245	0.752495	yes	UP	N	N	N	Y	Y	17.2	38.1
ENSRNOG00000027630.L01	297720	Casc1	cancer susceptibility candidate 1 [Source:RGD Symbol;Acc:1311213]	8.08	18.1	1.16	0.02265	0.754497	yes	UP	N	N	N	Y	Y	7.71	19
ENSRNOG00000025479.L01	313149	Cfap221	cilia and flagella associated protein 221 [Source:RGD Symbol;Acc:1584968]	0.533	2.25	2.08	0.02265	0.754497	yes	UP	N	N	N	Y	Y	0.51	2.37
ENSRNOG00000017413.L01	100911254	LOC100911254	interleukin-7 receptor subunit alpha-like [Source:RGD Symbol;Acc:6493735]	1.03	2.97	1.53	0.0228	0.75832	yes	UP	N	N	N	Y	Y	0.98	3.12
ENSRNOG00000025287	497957	RGD1565611	RGD1565611 [Source:RGD Symbol;Acc:1565611]	3.26	10.7	1.72	0.02315	0.766407	yes	UP	N	N	N	Y	Y	3.11	11.26
ENSRNOG00000042741.L01	292477	Adgb	androglobin [Source:RGD Symbol;Acc:1564259]	0.921	2.52	1.45	0.02335	0.770657	yes	UP	N	N	N	Y	Y	0.88	2.65
ENSRNOG00000006471.L01	25269	Pvalb	parvalbumin [Source:RGD Symbol;Acc:3457]	364	818	1.17	0.02345	0.772773	yes	UP	N	N	N	Y	Y	347.52	860.14
ENSRNOG00000015416.L01	363227	Nabp1	nucleic acid binding protein 1 [Source:RGD Symbol;Acc:1306658]	6.51	13.6	1.06	0.02365	0.776256	yes	UP	N	N	N	Y	Y	6.21	14.3
ENSRNOG00000009686.L01	29171	Aqp7	aquaporin 7 [Source:RGD Symbol;Acc:2145]	0.903	4.16	2.2	0.0237	0.776256	yes	UP	N	N	N	Y	Y	0.86	4.37
ENSRNOG00000050151.L01	287867	Ccdc40	coiled-coil domain containing 40 [Source:RGD Symbol;Acc:1592118]	1.17	2.93	1.33	0.0237	0.776256	yes	UP	N	N	N	Y	Y	1.11	3.08
ENSRNOG00000023216.L01	500528	Ccdc17	coiled-coil domain containing 17 [Source:RGD Symbol;Acc:1598211]	58.3	113	0.958	0.02395	0.783252	yes	UP	N	N	N	Y	N	55.63	119.07
ENSRNOG00000022099	365377	Trim72	tripartite motif-containing 72 [Source:RGD Symbol;Acc:1562778]	30.6	58.9	0.943	0.02405	0.785329	yes	UP	N	N	N	Y	N	29.21	61.9
ENSRNOG00000017959.L01	297444	Ccdc37	coiled-coil domain containing 37 [Source:RGD Symbol;Acc:1305768]	9.06	21	1.21	0.02415	0.787083	yes	UP	N	N	N	Y	Y	8.64	22.07
ENSRNOG00000034089.L01	301065	Ttc21a	tetratricopeptide repeat domain 21A [Source:RGD Symbol;Acc:1308806]	1.38	3.84	1.48	0.02425	0.787083	yes	UP	N	N	N	Y	Y	1.32	4.04
ENSRNOG00000020539.L01	24571	Muc1	mucin 1, cell surface associated [Source:RGD Symbol;Acc:3122]	26.4	50.2	0.924	0.02435	0.789138	yes	UP	N	N	N	Y	N	25.22	52.69
ENSRNOG00000039086.L01	300663	Ccdc153	coiled-coil domain containing 153 [Source:RGD Symbol;Acc:1305351]	11.8	24.9	1.08	0.02485	0.797356	yes	UP	N	N	N	Y	Y	11.21	26.17
ENSRNOG00000021109.L01	308594	Ccdc114	coiled-coil domain containing 114 [Source:RGD Symbol;Acc:1308141]	2.93	7	1.26	0.02485	0.797356	yes	UP	N	N	N	Y	Y	2.79	7.36
ENSRNOG00000013053.L01	293874	Trpm6	transient receptor potential cation channel, subfamily M, member 6 [Source:RGD Symbol;Acc:1309942]	0.484	3.03	2.65	0.0249	0.797356	yes	UP	N	N	N	Y	Y	0.46	3.19
ENSRNOG00000016553.L01	313653	Vwa5b1	von Willebrand factor A domain containing 5B1 [Source:RGD Symbol;Acc:1308559]	0.0866	0.96	3.47	0.02515	0.801782	yes	UP	N	N	N	Y	Y	0.08	1.01
ENSRNOG00000009329.L01	252917	Nr1d1	nuclear receptor subfamily 1, group D, member 1 [Source:RGD Symbol;Acc:628827]	26.6	66.2	1.31	0.02535	0.804582	yes	UP	N	N	N	Y	Y	25.41	69.56
ENSRNOG00000008560.L01	362580	Ccdc30	coiled-coil domain containing 30 [Source:RGD Symbol;Acc:1305604]	3.76	9.95	1.4	0.02555	0.805389	yes	UP	N	N	N	Y	Y	3.59	10.46
ENSRNOG00000020459.L01	54291	Rgs11	regulator of G-protein signaling 11 [Source:RGD Symbol;Acc:3563]	13	25.7	0.984	0.0256	0.805389	yes	UP	N	N	N	Y	N	12.4	27.02
ENSRNOG00000008170.L01	296345	Jph2	junctophilin 2 [Source:RGD Symbol;Acc:1305196]	17.3	33.6	0.96	0.0256	0.805389	yes	UP	N	N	N	Y	N	16.48	35.32
ENSRNOG00000003510.L01	246245	Fmo2	flavin containing monooxygenase 2 [Source:RGD Symbol;Acc:628600]	6.65	14.6	1.14	0.0259	0.812452	yes	UP	N	N	N	Y	Y	6.34	15.37
ENSRNOG00000021795.L01	300074	Fam227a	family with sequence similarity 227, member A [Source:RGD Symbol;Acc:1305939]	4.42	9.3	1.07	0.0268	0.832192	yes	UP	N	N	N	Y	Y	4.22	9.77
[truncated: 91 more rows]

## Sheet: DEG5 Y1-4&Y5-8 vs O1-4&O5-8
GeneAcc	EntrezGeneID	GeneName	Desc	Value_1	Value_2	log2fc	p-value	q-value	DEG:PV=0.05:SELECT	DEG:UP_DOWN	DEG:QV<=0.05	DEG:QV<=0.10	DEG:PV<=0.01	DEG:PV<=0.05	DEG:FC2>=0	EXP:Y1-4:FPKM	EXP:Y5-8:FPKM	EXP:O1-4:FPKM	EXP:O5-8:FPKM
[truncated: 2,570 more rows]
