# Supplementary material for: Increased calcium channel in the lamina propria of aging rat
Source: Aging (Albany NY). 2019 Oct 31;11(20):8810–24. doi: 10.18632/aging.102284 (PMC6834399; doi:10.18632/aging.102284)
Supplement: Supplementary data for Table 3 [file aging-11-102284-s001.xlsx]

## Sheet: Up
EntrezGeneID	GeneName	Desc	DEG1 Y1-4 vs O1-4								DEG2 Y1-4 vs O5-8								DEG3 Y5-8 vs O1-4								DEG4 Y5-8 vs O5-8								DEG5 Y1-4&Y5-8 vs O1-4&O5-8
			Value_1	Value_2	log2fc	p-value	q-value	DEG:UP_DOWN	EXP:Y1-4:FPKM	EXP:O1-4:FPKM	Value_1	Value_2	log2fc	p-value	q-value	DEG:UP_DOWN	EXP:Y1-4:FPKM	EXP:O5-8:FPKM	Value_1	Value_2	log2fc	p-value	q-value	DEG:UP_DOWN	EXP:Y5-8:FPKM	EXP:O1-4:FPKM	Value_1	Value_2	log2fc	p-value	q-value	DEG:UP_DOWN	EXP:Y5-8:FPKM	EXP:O5-8:FPKM	Value_1	Value_2	log2fc	p-value	q-value	DEG:UP_DOWN	EXP:Y1-4:FPKM	EXP:Y5-8:FPKM	EXP:O1-4:FPKM	EXP:O5-8:FPKM
24232	C3	complement component 3 [Source:RGD Symbol;Acc:2232]	5.22	18.2	1.81	0.0096	0.314432	UP	5.64	16.96	5.61	28.2	2.33	5e-05	0.0277683	UP	5.64	28.03
24299	Cyp2a3	cytochrome P450, family 2, subfamily a, polypeptide 3 [Source:RGD Symbol;Acc:2465]	47.4	178	1.91	0.01285	0.397001	UP	51.19	165.86	50.9	151	1.57	0.0037	0.369513	UP	51.19	150.35
24309	Dbp	D site of albumin promoter (albumin D-box) binding protein [Source:RGD Symbol;Acc:2491]	18.1	108	2.58	0.0059	0.258627	UP	19.56	100.43	19.5	98.3	2.34	0.00055	0.109296	UP	19.56	97.78
25041	P2rx6	purinergic receptor P2X, ligand-gated ion channel, 6 [Source:RGD Symbol;Acc:3243]	5.91	19.3	1.71	0.04095	0.792474	UP	6.39	17.94	6.36	19.2	1.59	0.0172	0.524289	UP	6.39	19.06	7.32	18.5	1.34	0.04385	0.828939	UP	7.55	17.94	7.92	18.1	1.2	0.0176	0.651866	UP	7.55	19.06	6.96	18.9	1.44	0.0001	0.00567772	UP	6.39	7.55	17.94	19.06
25350	Sftpd	surfactant protein D [Source:RGD Symbol;Acc:3667]	25.6	105	2.04	0.0085	0.285708	UP	27.69	97.65	27.6	89	1.69	0.0025	0.291776	UP	27.69	88.55
29511	Padi2	peptidyl arginine deiminase, type II [Source:RGD Symbol;Acc:3288]	4.79	33.9	2.82	0.00055	0.258627	UP	5.18	31.52	5.15	23	2.16	0.00015	0.0644434	UP	5.18	22.86
29658	Cacng1	calcium channel, voltage-dependent, gamma subunit 1 [Source:RGD Symbol;Acc:2249]	15	64.3	2.1	0.00515	0.258627	UP	16.2	59.85	16.1	38.9	1.27	0.0312	0.747815	UP	16.2	38.7
50688	Cacnb1	calcium channel, voltage-dependent, beta 1 subunit [Source:RGD Symbol;Acc:68382]	3.93	17.6	2.16	0.0049	0.258627	UP	4.25	16.33	4.23	11.3	1.42	0.02085	0.589706	UP	4.25	11.25
60666	Gpd1	glycerol-3-phosphate dehydrogenase 1 (soluble) [Source:RGD Symbol;Acc:621381]	10.3	60.2	2.55	0.00115	0.258627	UP	11.13	55.98	11.1	46.1	2.06	0.0003	0.09108	UP	11.13	45.83
79131	Fabp3	fatty acid binding protein 3, muscle and heart [Source:RGD Symbol;Acc:69048]	128	799	2.64	0.0026	0.258627	UP	138.58	743.08	138	376	1.45	0.0141	0.469382	UP	138.58	374.23
80900	Slco1a2	solute carrier organic anion transporter family, member 1A2 [Source:RGD Symbol;Acc:70985]	5.06	19.7	1.96	0.0174	0.486508	UP	5.47	18.34	5.44	27.1	2.32	0.00025	0.0837132	UP	5.47	26.98
83708	Mybph	myosin binding protein H [Source:RGD Symbol;Acc:620287]	9.69	67.4	2.8	5e-05	0.0726033	UP	10.47	62.66	10.4	51.8	2.31	5e-05	0.0277683	UP	10.47	51.53
89813	Pdk4	pyruvate dehydrogenase kinase, isozyme 4 [Source:RGD Symbol;Acc:69061]	41.6	229	2.46	0.02735	0.641991	UP	44.96	213.32	44.7	131	1.55	0.0061	0.422771	UP	44.96	130.81	49.6	220	2.15	0.02015	0.640889	UP	51.18	213.32	53.7	124	1.21	0.0052	0.380911	UP	51.18	130.81	47.9	183	1.93	5e-05	0.00322294	UP	44.96	51.18	213.32	130.81
114592	Aurkb	aurora kinase B [Source:RGD Symbol;Acc:621625]	23.4	105	2.17	0.0133	0.406864	UP	25.24	98.07	25.1	128	2.35	5e-05	0.0277683	UP	25.24	127.21
115771	Usp2	ubiquitin specific peptidase 2 [Source:RGD Symbol;Acc:621073]	5.56	23	2.05	0.00775	0.268794	UP	6.01	21.37	5.98	15.6	1.39	0.01315	0.446904	UP	6.01	15.56
117095	Bhlhe41	basic helix-loop-helix family, member e41 [Source:RGD Symbol;Acc:70900]	3.04	11.2	1.88	0.01305	0.400906	UP	3.29	10.41	3.27	8.45	1.37	0.0432	0.908277	UP	3.29	8.41
117558	Mylk2	myosin light chain kinase 2 [Source:RGD Symbol;Acc:620934]	4.87	32.2	2.73	0.00065	0.258627	UP	5.26	29.94	5.23	17.7	1.76	0.0022	0.263653	UP	5.26	17.61
140927	Selenbp1	selenium binding protein 1 [Source:RGD Symbol;Acc:620571]	18.9	61.9	1.71	0.0134	0.408203	UP	20.41	57.57	20.3	46	1.18	0.02625	0.6731	UP	20.41	45.81
171009	Actn3	actinin alpha 3 [Source:RGD Symbol;Acc:621792]	0.658	198	8.23	0.0119	0.376189	UP	0.71	183.86	0.708	157	7.79	0.00145	0.185486	UP	0.71	156.33
292879	Mybpc2	myosin binding protein C, fast-type [Source:RGD Symbol;Acc:1311596]	10.2	132	3.7	0.0005	0.258627	UP	10.99	122.77	10.9	101	3.21	5e-05	0.0277683	UP	10.99	100.67
293591	Cd163l1	CD163 molecule-like 1 [Source:RGD Symbol;Acc:1307378]	3.17	20.9	2.72	0.0023	0.258627	UP	3.43	19.47	3.41	24.1	2.82	5e-05	0.0277683	UP	3.43	24.02
296345	Jph2	junctophilin 2 [Source:RGD Symbol;Acc:1305196]	13	53.8	2.05	0.00905	0.301865	UP	14.08	50.05	14	35.5	1.34	0.0108	0.422771	UP	14.08	35.32
297748	Jph1	junctophilin 1 [Source:RGD Symbol;Acc:1308789]	7.46	22	1.56	0.0303	0.678278	UP	8.06	20.48	8.03	18.2	1.18	0.03195	0.757814	UP	8.06	18.12
300990	RGD1307461	similar to RIKEN cDNA 6430571L13 gene; similar to g20 protein [Source:RGD Symbol;Acc:1307461]	3.02	12.8	2.09	0.01295	0.398395	UP	3.27	11.94	3.25	10.3	1.67	0.01315	0.446904	UP	3.27	10.29
301518	Prkag3	protein kinase, AMP-activated, gamma 3 non-catalytic subunit [Source:RGD Symbol;Acc:1308698]	4.04	13	1.69	0.03335	0.714957	UP	4.36	12.09	4.34	10.6	1.28	0.04825	0.965424	UP	4.36	10.52
306570	Ank1	ankyrin 1, erythrocytic [Source:RGD Symbol;Acc:1309620]	33.1	154	2.21	0.0052	0.258627	UP	35.81	143.09	35.6	82.9	1.22	0.01945	0.564893	UP	35.81	82.54
306616	Myom2	myomesin 2 [Source:RGD Symbol;Acc:631437]	4.7	35	2.89	0.0003	0.21781	UP	5.08	32.55	5.06	21.1	2.06	0.00025	0.0837132	UP	5.08	20.96
308410	Rtn2	reticulon 2 [Source:RGD Symbol;Acc:1303245]	51.2	261	2.35	0.00205	0.258627	UP	55.4	242.94	55.1	134	1.28	0.01495	0.485608	UP	55.4	132.99
309459	Neurl1	neuralized E3 ubiquitin protein ligase 1 [Source:RGD Symbol;Acc:1307021]	3.58	12.6	1.81	0.01645	0.473312	UP	3.87	11.67	3.85	9.33	1.28	0.0357	0.808041	UP	3.87	9.28
310681	Hfe2	hemochromatosis type 2 (juvenile) [Source:RGD Symbol;Acc:1310195]	39.9	166	2.06	0.0093	0.307847	UP	43.12	154.21	42.9	90.9	1.08	0.0339	0.783658	UP	43.12	90.46
361276	Cdnf	cerebral dopamine neurotrophic factor [Source:RGD Symbol;Acc:1307600]	4	17.2	2.11	0.0092	0.306399	UP	4.32	16.02	4.3	13.1	1.6	0.04245	0.897481	UP	4.32	13.02
362676	Fam213b	family with sequence similarity 213, member B [Source:RGD Symbol;Acc:1308251]	11.4	62.1	2.45	0.01215	0.381324	UP	12.3	57.81	12.2	41.1	1.75	0.0168	0.514853	UP	12.3	40.94
364403	Blk	BLK proto-oncogene, Src family tyrosine kinase [Source:RGD Symbol;Acc:1308859]	0.335	2.8	3.07	0.04045	0.790707	UP	0.36	2.61	0.36	3.06	3.09	0.0151	0.487698	UP	0.36	3.04	0.521	2.69	2.37	0.04875	0.865504	UP	0.54	2.61	0.563	2.89	2.36	0.01855	0.669761	UP	0.54	3.04	0.456	2.88	2.66	0.00045	0.0169163	UP	0.36	0.54	2.61	3.04
365391	Trpm5	transient receptor potential cation channel, subfamily M, member 5 [Source:RGD Symbol;Acc:1310620]	4.23	13.8	1.71	0.021	0.553085	UP	4.57	12.86	4.55	13.7	1.59	0.00555	0.422771	UP	4.57	13.68
498555	LOC498555	similar to 60S acidic ribosomal protein P2 [Source:RGD Symbol;Acc:1590791]	107	286	1.42	0.04065	0.79124	UP	115.75	265.68	115	282	1.29	0.0185	0.548496	UP	115.75	280.85
501718	Dusp26	dual specificity phosphatase 26 (putative) [Source:RGD Symbol;Acc:1310090]	4.86	42.1	3.11	0.00145	0.258627	UP	5.26	39.13	5.23	24.2	2.21	0.00385	0.38115	UP	5.26	24.04
682930	Cacna1s	calcium channel, voltage-dependent, L type, alpha 1S subunit [Source:RGD Symbol;Acc:70983]	20.7	89.3	2.11	0.0104	0.337087	UP	22.41	83.04	22.3	53.5	1.26	0.01565	0.49356	UP	22.41	53.19
684516	Kcnc4	potassium voltage gated channel, Shaw-related subfamily, member 4 [Source:RGD Symbol;Acc:1589169]	3.61	13.9	1.94	0.02565	0.624925	UP	3.9	12.9	3.88	10.7	1.47	0.0292	0.719571	UP	3.9	10.68
690326	LOC690326	hypothetical protein LOC690326 [Source:RGD Symbol;Acc:1597362]	0	0.809	inf	0.0374	0.762029	UP	0	0.75	0	1.89	inf	0.00015	0.0644434	UP	0	1.88
691161	Sh2d6	SH2 domain containing 6 [Source:RGD Symbol;Acc:1587427]	17.1	48.7	1.5	0.04565	0.839074	UP	18.54	45.28	18.4	50.5	1.45	0.0065	0.422771	UP	18.54	50.28

## Sheet: Down
EntrezGeneID	GeneName	Desc	DEG1 Y1-4 vs O1-4								DEG2 Y1-4 vs O5-8								DEG3 Y5-8 vs O1-4								DEG4 Y5-8 vs O5-8								DEG5 Y1-4&Y5-8 vs O1-4&O5-8
			Value_1	Value_2	log2fc	p-value	q-value	DEG:UP_DOWN	EXP:Y1-4:FPKM	EXP:O1-4:FPKM	Value_1	Value_2	log2fc	p-value	q-value	DEG:UP_DOWN	EXP:Y1-4:FPKM	EXP:O5-8:FPKM	Value_1	Value_2	log2fc	p-value	q-value	DEG:UP_DOWN	EXP:Y5-8:FPKM	EXP:O1-4:FPKM	Value_1	Value_2	log2fc	p-value	q-value	DEG:UP_DOWN	EXP:Y5-8:FPKM	EXP:O5-8:FPKM	Value_1	Value_2	log2fc	p-value	q-value	DEG:UP_DOWN	EXP:Y1-4:FPKM	EXP:Y5-8:FPKM	EXP:O1-4:FPKM	EXP:O5-8:FPKM
24884	Yes1	Yamaguchi sarcoma viral (v-yes) oncogene homolog 1 [Source:RGD Symbol;Acc:3977]	20.1	6.3	-1.67	0.03125	0.692428	DOWN	21.71	5.87
25203	Ccnb1	cyclin B1 [Source:RGD Symbol;Acc:2291]	12.6	2.16	-2.55	0.01725	0.484178	DOWN	13.62	2.01
25427	Cyp51	cytochrome P450, family 51 [Source:RGD Symbol;Acc:2481]	26.9	9.41	-1.52	0.03015	0.67631	DOWN	29.07	8.76
25675	Hmgcr	3-hydroxy-3-methylglutaryl-CoA reductase [Source:RGD Symbol;Acc:2803]	27.5	8.52	-1.69	0.0167	0.476727	DOWN	29.72	7.93
29518	Lgals7	lectin, galactoside-binding, soluble, 7 [Source:RGD Symbol;Acc:61951]	588	66.7	-3.14	5e-05	0.0726033	DOWN	635.49	62.06
54237	Cdk1	cyclin-dependent kinase 1 [Source:RGD Symbol;Acc:2319]	15.1	2.75	-2.46	0.02645	0.633085	DOWN	16.31	2.56
60325	Serpinb2	serpin peptidase inhibitor, clade B (ovalbumin), member 2 [Source:RGD Symbol;Acc:621823]	68.7	11.1	-2.63	0.0006	0.258627	DOWN	74.13	10.35
60378	Lypd3	Ly6/Plaur domain containing 3 [Source:RGD Symbol;Acc:69053]	139	31.1	-2.16	0.00335	0.258627	DOWN	150.38	28.93
64030	Kit	v-kit Hardy-Zuckerman 4 feline sarcoma viral oncogene homolog [Source:RGD Symbol;Acc:620568]	16.7	5.47	-1.61	0.0201	0.539825	DOWN	18	5.09
64033	Ccnd2	cyclin D2 [Source:RGD Symbol;Acc:621083]	130	26.8	-2.28	0.01065	0.344166	DOWN	140.49	24.96
64507	Fmod	fibromodulin [Source:RGD Symbol;Acc:619769]	23.8	4.66	-2.35	0.0052	0.258627	DOWN	25.71	4.33
64557	Bard1	BRCA1 associated RING domain 1 [Source:RGD Symbol;Acc:621072]	1.72	0.297	-2.53	0.04885	0.850366	DOWN	1.86	0.28
84590	Rab27b	RAB27B, member RAS oncogene family [Source:RGD Symbol;Acc:620114]	18.1	3.33	-2.44	0.0014	0.258627	DOWN	19.5	3.1
116589	Serpinb5	serpin peptidase inhibitor, clade B (ovalbumin), member 5 [Source:RGD Symbol;Acc:69342]	67.5	10.8	-2.64	0.00075	0.258627	DOWN	72.83	10.11
117556	Sv2b	synaptic vesicle glycoprotein 2b [Source:RGD Symbol;Acc:619716]	3.95	0.361	-3.45	0.0183	0.507115	DOWN	4.27	0.34
171160	Hopx	HOP homeobox [Source:RGD Symbol;Acc:621841]	368	75.5	-2.29	0.00265	0.258627	DOWN	397.75	70.28
171178	Adh7	alcohol dehydrogenase 7 (class IV), mu or sigma polypeptide [Source:RGD Symbol;Acc:621638]	184	31.1	-2.57	0.0011	0.258627	DOWN	198.77	28.95
171287	Epha7	Eph receptor A7 [Source:RGD Symbol;Acc:70957]	9.12	2.81	-1.7	0.02	0.538467	DOWN	9.85	2.62
171576	Bub1b	BUB1 mitotic checkpoint serine/threonine kinase B [Source:RGD Symbol;Acc:619791]	5.34	0.478	-3.48	0.0146	0.43562	DOWN	5.77	0.45
266775	Serpinb10	serpin peptidase inhibitor, clade B (ovalbumin), member 10 [Source:RGD Symbol;Acc:628853]	89	21.1	-2.08	0.00555	0.258627	DOWN	96.08	19.65
287699	Krt13	keratin 13 [Source:RGD Symbol;Acc:1302937]	894	119	-2.91	0.0201	0.539825	DOWN	965.93	110.71
289054	Aspm	asp (abnormal spindle) homolog, microcephaly associated (Drosophila) [Source:RGD Symbol;Acc:1307111]	4.85	1.06	-2.19	0.00945	0.310922	DOWN	5.24	0.99
290595	LOC290595	hypothetical gene supported by AF152002 [Source:RGD Symbol;Acc:1566160]	169	17.7	-3.26	0.00015	0.136131	DOWN	182.1	16.42
291752	Dsg3	desmoglein 3 [Source:RGD Symbol;Acc:1592103]	62.7	7.59	-3.05	0.00035	0.245915	DOWN	67.7	7.07
291755	Dsg1	desmoglein 1 [Source:RGD Symbol;Acc:1309925]	25.1	0.978	-4.68	5e-05	0.0726033	DOWN	27.08	0.91
291760	Dsc2	desmocollin 2 [Source:RGD Symbol;Acc:1309426]	81.5	14.4	-2.5	0.0018	0.258627	DOWN	88.04	13.42
292755	Nccrp1	non-specific cytotoxic cell receptor protein 1 homolog (zebrafish) [Source:RGD Symbol;Acc:1305932]	60.5	1.83	-5.05	0.00075	0.258627	DOWN	65.43	1.7
292849	Klk11	kallikrein related-peptidase 11 [Source:RGD Symbol;Acc:1308690]	14.2	0.561	-4.66	0.02745	0.641991	DOWN	15.37	0.52
294119	Moxd1	monooxygenase, DBH-like 1 [Source:RGD Symbol;Acc:1310033]	9.94	1.43	-2.8	0.00445	0.258627	DOWN	10.74	1.33
295714	RGD1311224	similar to fatty acid desaturase 2; linoleoyl-CoA desaturase (delta-6-desaturase)-like 2; delta-6 fatty acid desaturase [Source:RGD Symbol;Acc:1311224]	33.7	5.59	-2.59	0.00345	0.258627	DOWN	36.4	5.2
296060	Arhgap11a	Rho GTPase activating protein 11A [Source:RGD Symbol;Acc:1309107]	6.33	1.44	-2.13	0.01705	0.482921	DOWN	6.83	1.35
296179	Fermt1	fermitin family member 1 [Source:RGD Symbol;Acc:1306816]	13	3.29	-1.98	0.007	0.258627	DOWN	14.08	3.07
298555	Grhl3	grainyhead-like 3 (Drosophila) [Source:RGD Symbol;Acc:1308320]	25.4	3.74	-2.76	0.00055	0.258627	DOWN	27.42	3.48
300656	Trim29	tripartite motif-containing 29 [Source:RGD Symbol;Acc:1307858]	91	21.1	-2.11	0.0045	0.258627	DOWN	98.34	19.64
300682	Tmprss13	transmembrane protease, serine 13 [Source:RGD Symbol;Acc:1310872]	19	3.25	-2.54	0.00475	0.258627	DOWN	20.49	3.03
301269	Gpr111	G protein-coupled receptor 111 [Source:RGD Symbol;Acc:1306718]	5.31	0.463	-3.52	0.0035	0.258627	DOWN	5.74	0.43
302328	Pof1b	premature ovarian failure 1B [Source:RGD Symbol;Acc:1560798]	48.1	7.82	-2.62	0.00095	0.258627	DOWN	51.94	7.29
303530	Krt16	keratin 16 [Source:RGD Symbol;Acc:1590901]	10.5	1.11	-3.23	0.03845	0.774727	DOWN	11.3	1.03
307056	Anlnl1	anillin, actin binding protein-like 1 [Source:RGD Symbol;Acc:1566097]	3.98	0.332	-3.58	0.02655	0.633391	DOWN	4.3	0.31
307563	Dsc3	desmocollin 3 [Source:RGD Symbol;Acc:1311782]	26.1	3	-3.12	5e-05	0.0726033	DOWN	28.21	2.79
307838	Chst4	carbohydrate (N-acetylglucosamine 6-O) sulfotransferase 4 [Source:RGD Symbol;Acc:1310798]	5.95	1.59	-1.91	0.03835	0.773427	DOWN	6.43	1.48
308761	Prc1	protein regulator of cytokinesis 1 [Source:RGD Symbol;Acc:1311754]	15.6	2.11	-2.89	0.00675	0.258627	DOWN	16.84	1.96
308797	Cemip	cell migration inducing protein, hyaluronan binding [Source:RGD Symbol;Acc:1305254]	2.01	0.105	-4.26	0.0281	0.648134	DOWN	2.17	0.1
308836	Kctd14	potassium channel tetramerization domain containing 14 [Source:RGD Symbol;Acc:1306430]	40.8	13	-1.65	0.0218	0.563257	DOWN	44.09	12.12
309523	Kif20b	kinesin family member 20B [Source:RGD Symbol;Acc:1308497]	2.33	0.372	-2.65	0.0208	0.549812	DOWN	2.51	0.35
310621	Iqgap3	IQ motif containing GTPase activating protein 3 [Source:RGD Symbol;Acc:1305951]	3.34	0.661	-2.34	0.01565	0.455104	DOWN	3.61	0.62
311325	Knstrn	kinetochore-localized astrin/SPAG5 binding protein [Source:RGD Symbol;Acc:1303240]	7.86	0.493	-3.99	0.0196	0.53098	DOWN	8.49	0.46
311336	Nusap1	nucleolar and spindle associated protein 1 [Source:RGD Symbol;Acc:1305764]	7.06	1.18	-2.58	0.01865	0.512899	DOWN	7.62	1.1
311742	Cdca7	cell division cycle associated 7 [Source:RGD Symbol;Acc:1309363]	31.3	7.59	-2.04	0.00575	0.258627	DOWN	33.84	7.07
313125	Bach2	BTB and CNC homology 1, basic leucine zipper transcription factor 2 [Source:RGD Symbol;Acc:1562865]	3.42	1.02	-1.75	0.0398	0.785496	DOWN	3.7	0.95
314539	Macc1	metastasis associated in colon cancer 1 [Source:RGD Symbol;Acc:1309838]	4.4	1.04	-2.08	0.0278	0.64395	DOWN	4.75	0.97
315318	Krt80	keratin 80 [Source:RGD Symbol;Acc:1359177]	105	14	-2.91	0.0004	0.258627	DOWN	113.47	13.02
315663	Exph5	exophilin 5 [Source:RGD Symbol;Acc:1560308]	10.8	3.61	-1.57	0.02175	0.563257	DOWN	11.63	3.37
315829	Fam83b	family with sequence similarity 83, member B [Source:RGD Symbol;Acc:1311988]	8.72	1.77	-2.3	0.0024	0.258627	DOWN	9.42	1.65
315852	Ttk	Ttk protein kinase [Source:RGD Symbol;Acc:1305558]	2.57	0.292	-3.14	0.02905	0.659789	DOWN	2.77	0.27
316539	Epha4	Eph receptor A4 [Source:RGD Symbol;Acc:1560587]	5.68	1.88	-1.59	0.0389	0.778036	DOWN	6.13	1.75
360243	Top2a	topoisomerase (DNA) II alpha [Source:RGD Symbol;Acc:62048]	12.7	1.29	-3.29	0.0009	0.258627	DOWN	13.69	1.2
360868	Sft2d2	SFT2 domain containing 2 [Source:RGD Symbol;Acc:1310623]	60.8	15.7	-1.95	0.0172	0.484178	DOWN	65.73	14.66
361972	Tmem154	transmembrane protein 154 [Source:RGD Symbol;Acc:1563262]	26.8	5.78	-2.21	0.00505	0.258627	DOWN	28.92	5.39
361993	Them5	thioesterase superfamily member 5 [Source:RGD Symbol;Acc:1562059]	100	14.7	-2.77	0.01505	0.444782	DOWN	108.22	13.69
362044	Cenpe	centromere protein E [Source:RGD Symbol;Acc:1307115]	2.23	0.209	-3.42	0.0049	0.258627	DOWN	2.41	0.19
362510	Melk	maternal embryonic leucine zipper kinase [Source:RGD Symbol;Acc:1308974]	2.82	0.261	-3.43	0.0332	0.713145	DOWN	3.05	0.24
362720	Rrm2	ribonucleotide reductase M2 [Source:RGD Symbol;Acc:1598310]	11.5	0.741	-3.96	0.0196	0.53098	DOWN	12.45	0.69
363104	Cd109	CD109 molecule [Source:RGD Symbol;Acc:1311287]	11.7	1.54	-2.93	0.0027	0.258627	DOWN	12.62	1.43
364774	Calml5	calmodulin-like 5 [Source:RGD Symbol;Acc:1310047]	291	34	-3.1	0.0029	0.258627	DOWN	314.38	31.61
367786	Bmx	BMX non-receptor tyrosine kinase [Source:RGD Symbol;Acc:1565643]	50.1	10.7	-2.23	0.01075	0.346369	DOWN	54.13	9.95
499166	Mgat4a	mannosyl (alpha-1,3-)-glycoprotein beta-1,4-N-acetylglucosaminyltransferase, isozyme A [Source:RGD Symbol;Acc:1305650]	22.2	5.59	-1.99	0.007	0.258627	DOWN	23.97	5.21
499721	Clca4l	chloride channel calcium activated 4-like [Source:RGD Symbol;Acc:1591945]	28.7	0.677	-5.4	0.0021	0.258627	DOWN	30.98	0.63
499847	Prrg4	proline rich Gla (G-carboxyglutamic acid) 4 (transmembrane) [Source:RGD Symbol;Acc:1560542]	17.8	4.8	-1.89	0.0102	0.331591	DOWN	19.28	4.48
501106	Gpr115	G protein-coupled receptor 115 [Source:RGD Symbol;Acc:1565216]	14.6	1.15	-3.67	0.00665	0.258627	DOWN	15.73	1.07
680515	Ckap2l	cytoskeleton associated protein 2-like [Source:RGD Symbol;Acc:1590645]	4.89	0.77	-2.67	0.01545	0.452554	DOWN	5.28	0.72
689830	Anxa9	annexin A9 [Source:RGD Symbol;Acc:1587550]	25.1	2.69	-3.22	0.00315	0.258627	DOWN	27.14	2.51
690209	Nek2	NIMA-related kinase 2 [Source:RGD Symbol;Acc:619792]	2.31	0.247	-3.22	0.03425	0.725681	DOWN	2.5	0.23
691173	Ckap2	cytoskeleton associated protein 2 [Source:RGD Symbol;Acc:1311631]	6.24	1.46	-2.09	0.02645	0.633085	DOWN	6.74	1.36
691259	Lypd8	LY6/PLAUR domain containing 8 [Source:RGD Symbol;Acc:1586251]	35.1	0.647	-5.76	0.0085	0.285708	DOWN	37.86	0.6
691979	Esco2	establishment of sister chromatid cohesion N-acetyltransferase 2 [Source:RGD Symbol;Acc:1593313]	2.83	0.449	-2.66	0.02155	0.56146	DOWN	3.05	0.42
100359539	LOC100359539	ribonucleotide reductase M2 polypeptide [Source:RGD Symbol;Acc:2323655]	7.61	1.25	-2.61	0.02475	0.609525	DOWN	8.22	1.16
100909901	LOC100909901	rac GTPase-activating protein 1-like [Source:RGD Symbol;Acc:6501444]	4.25	0.369	-3.53	0.02355	0.593683	DOWN	4.59	0.34
100911252	LOC100360977	TRIMCyp-like [Source:RGD Symbol;Acc:2321083]	147	26.2	-2.49	0.00085	0.258627	DOWN	159.13	24.38
